# Supplementary material
Source: PubMed Central journal article supplement (PMC6319954)

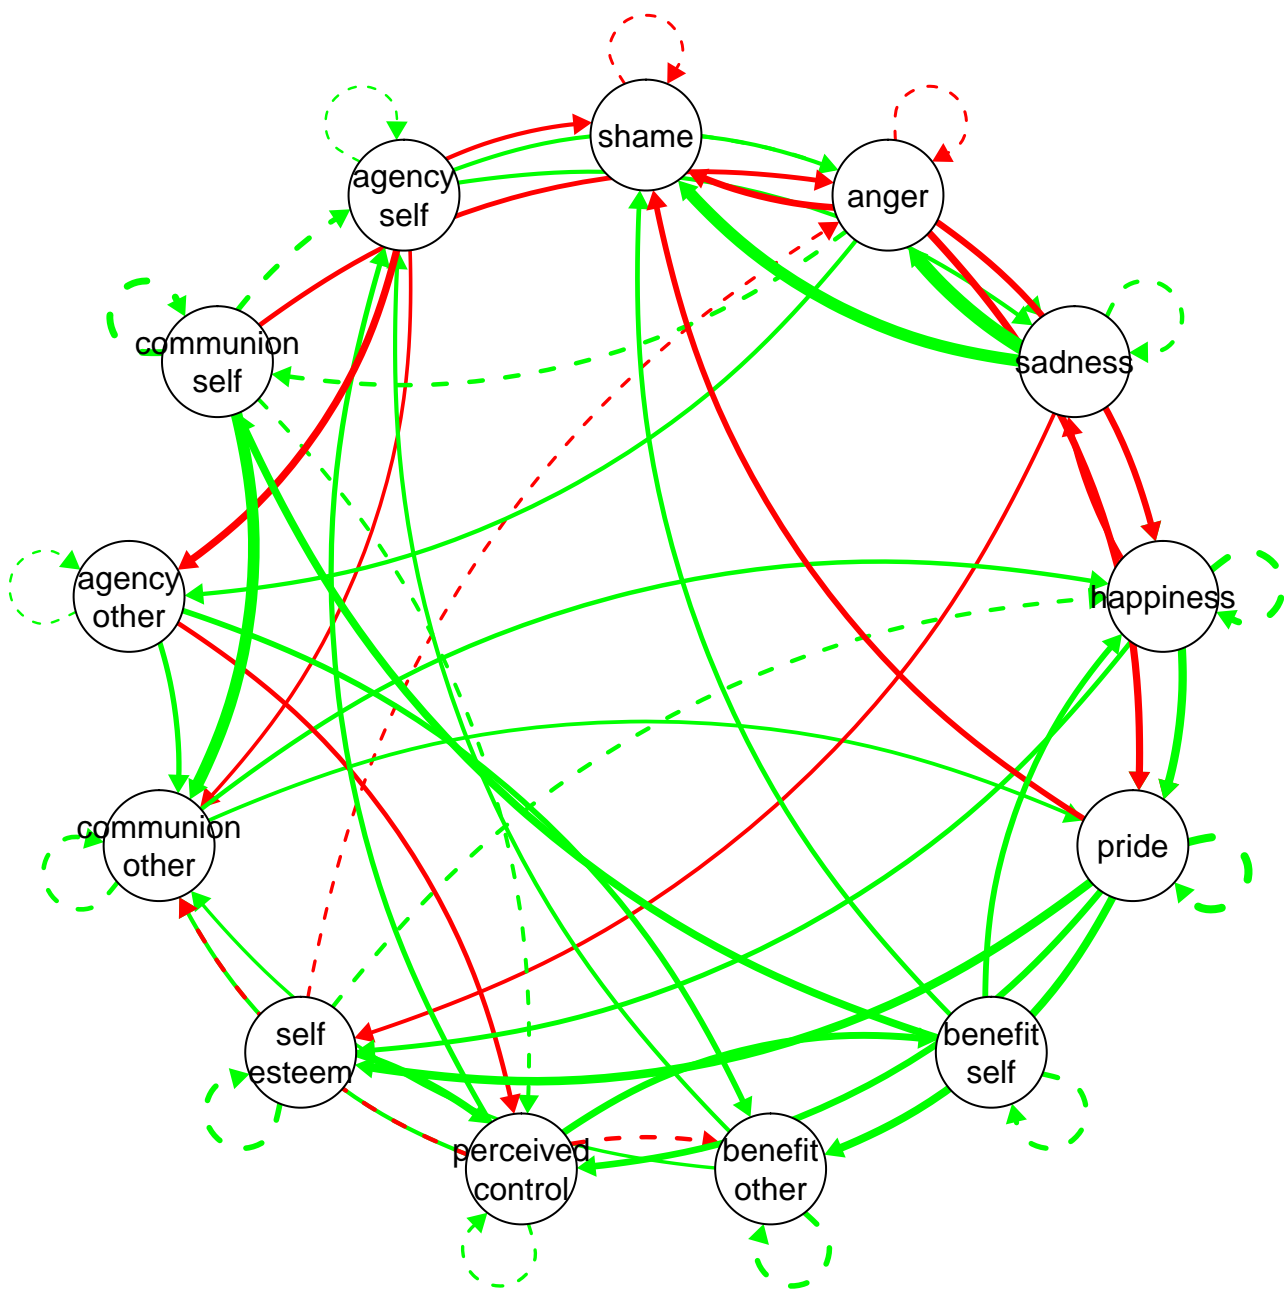



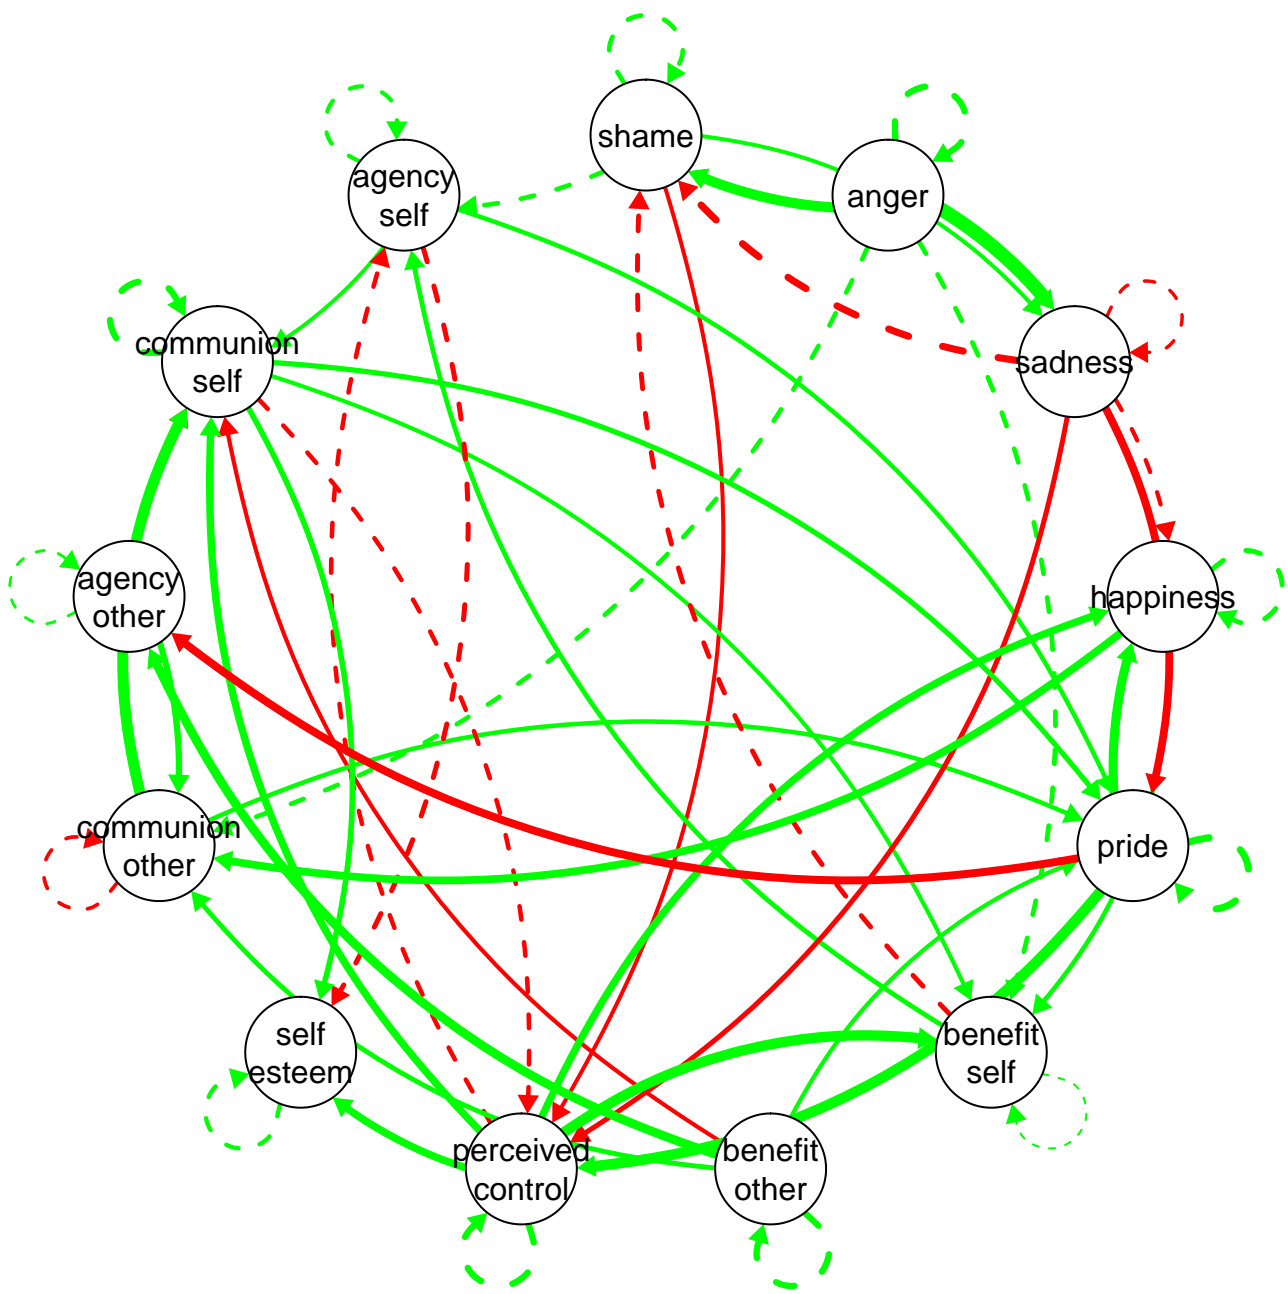

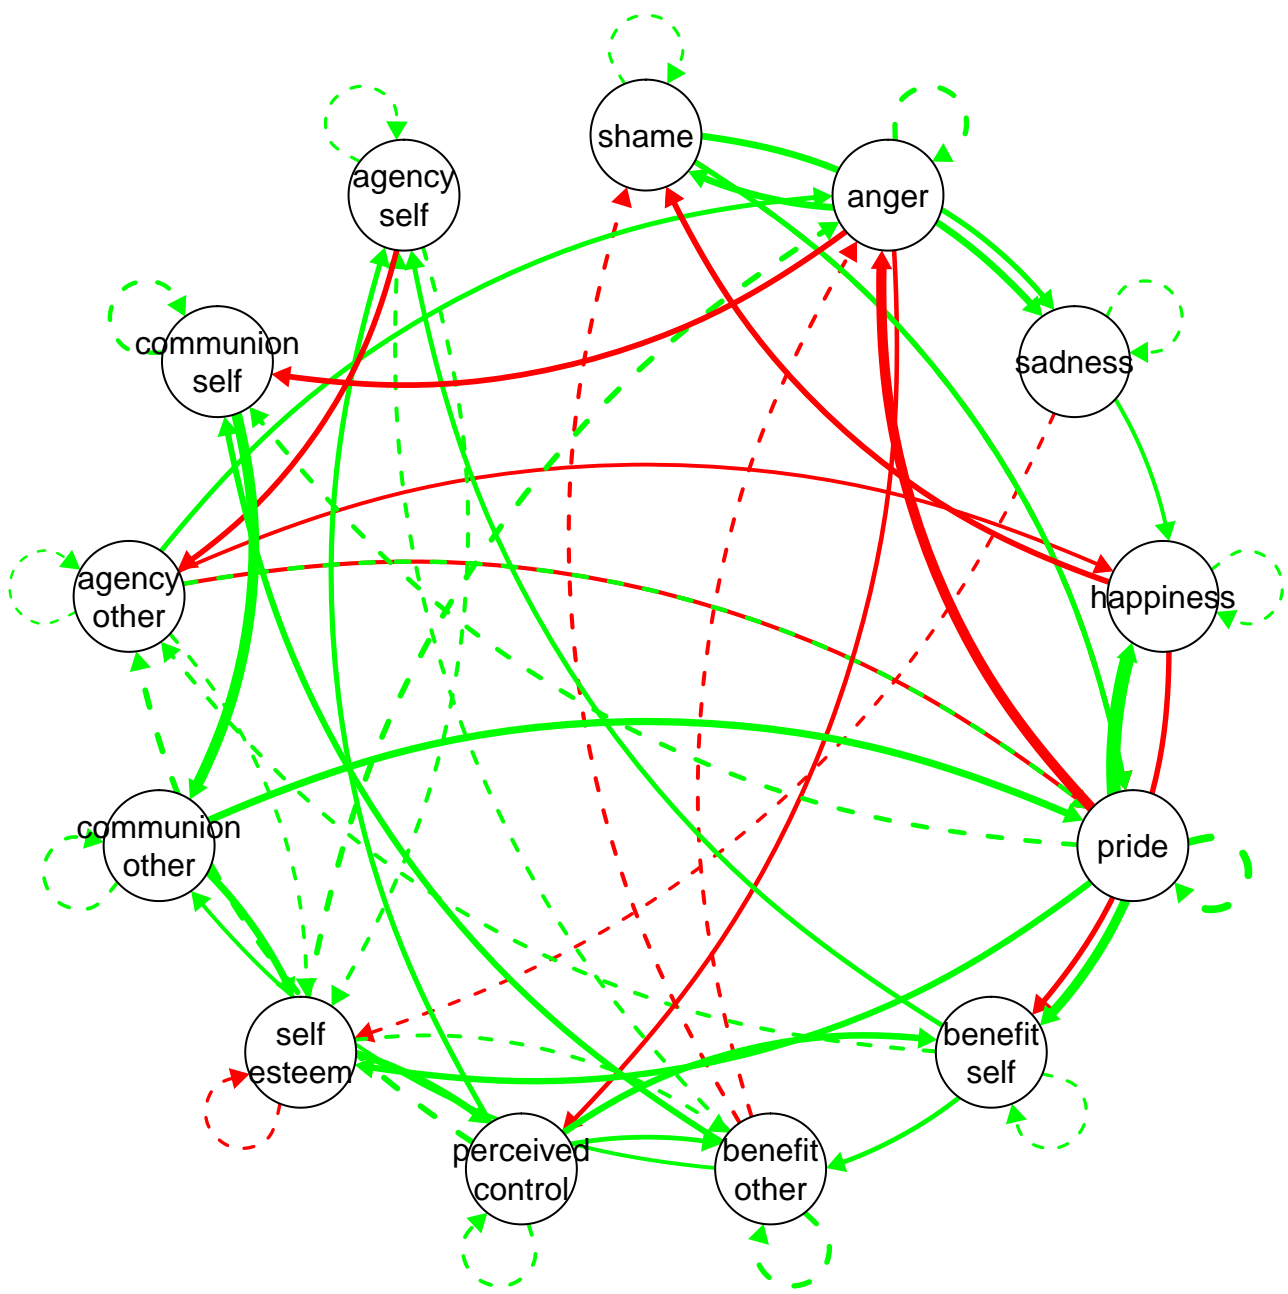



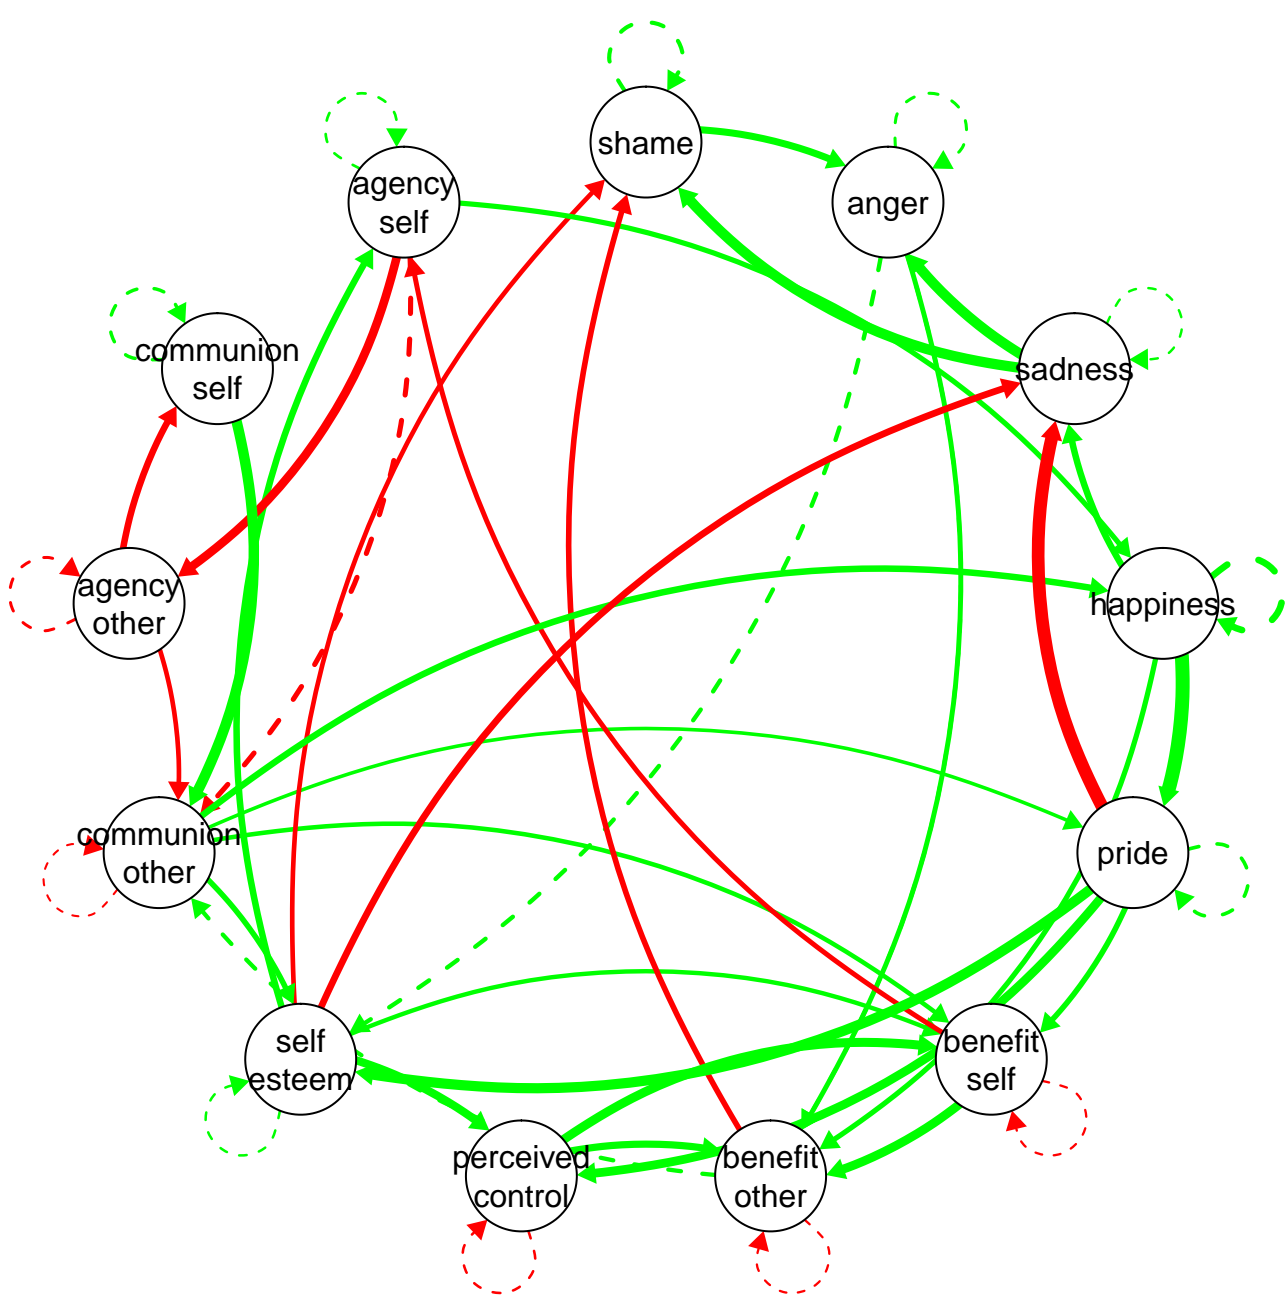

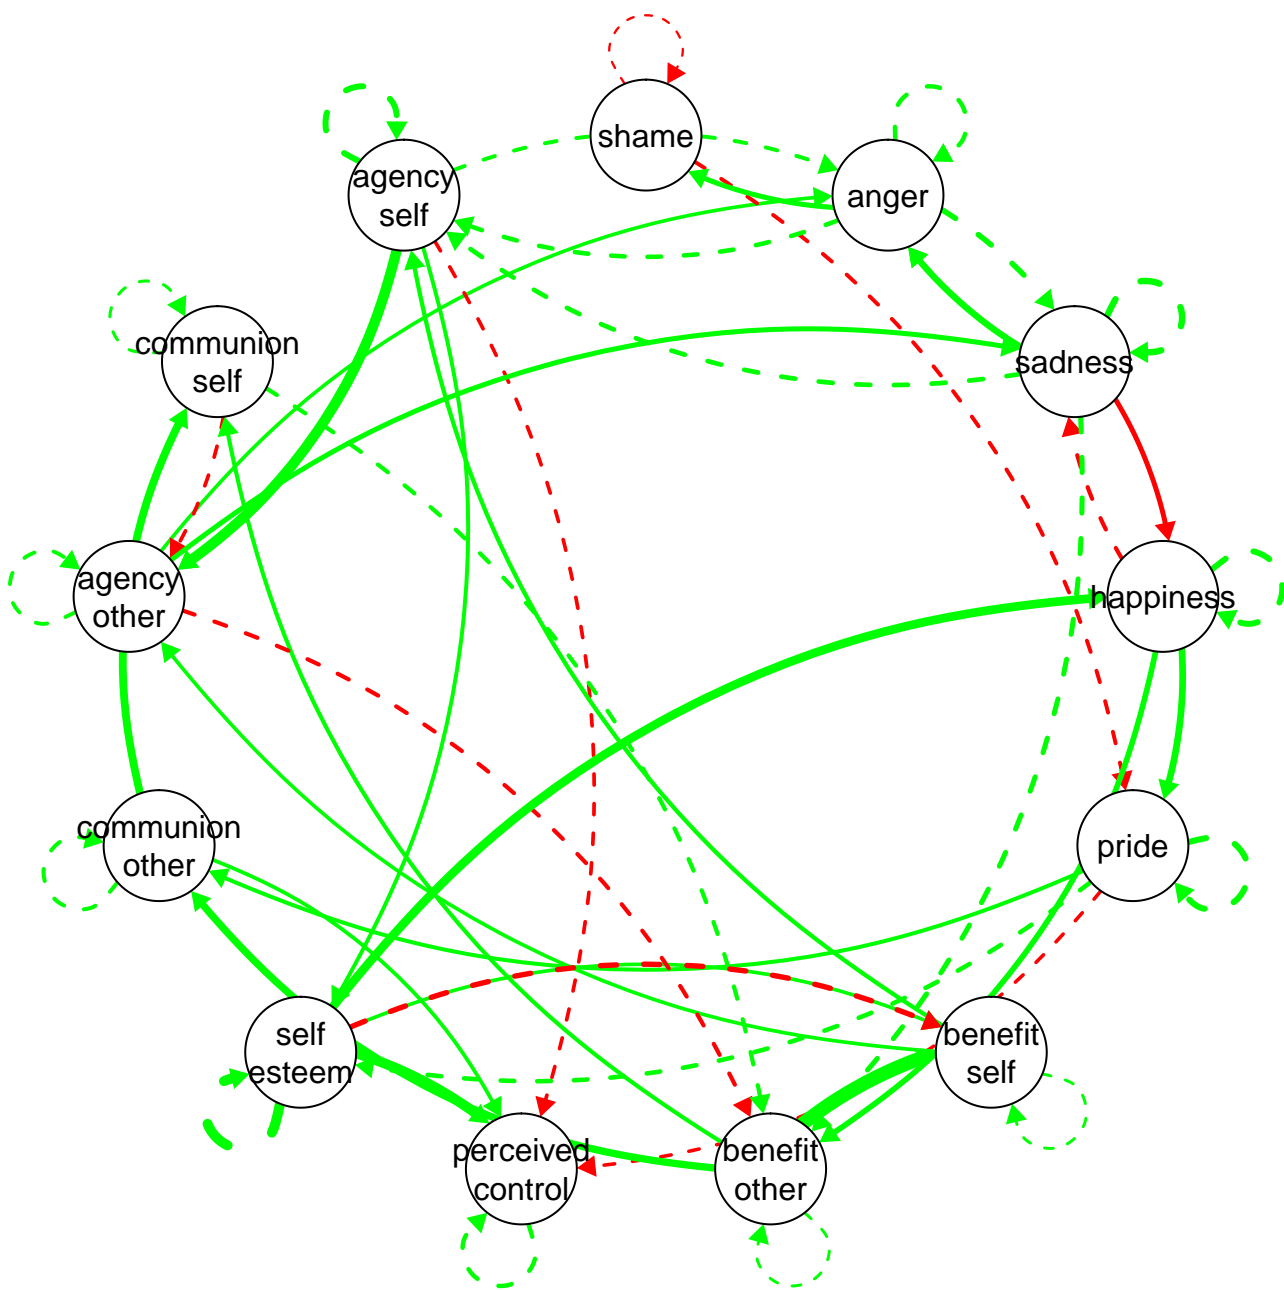

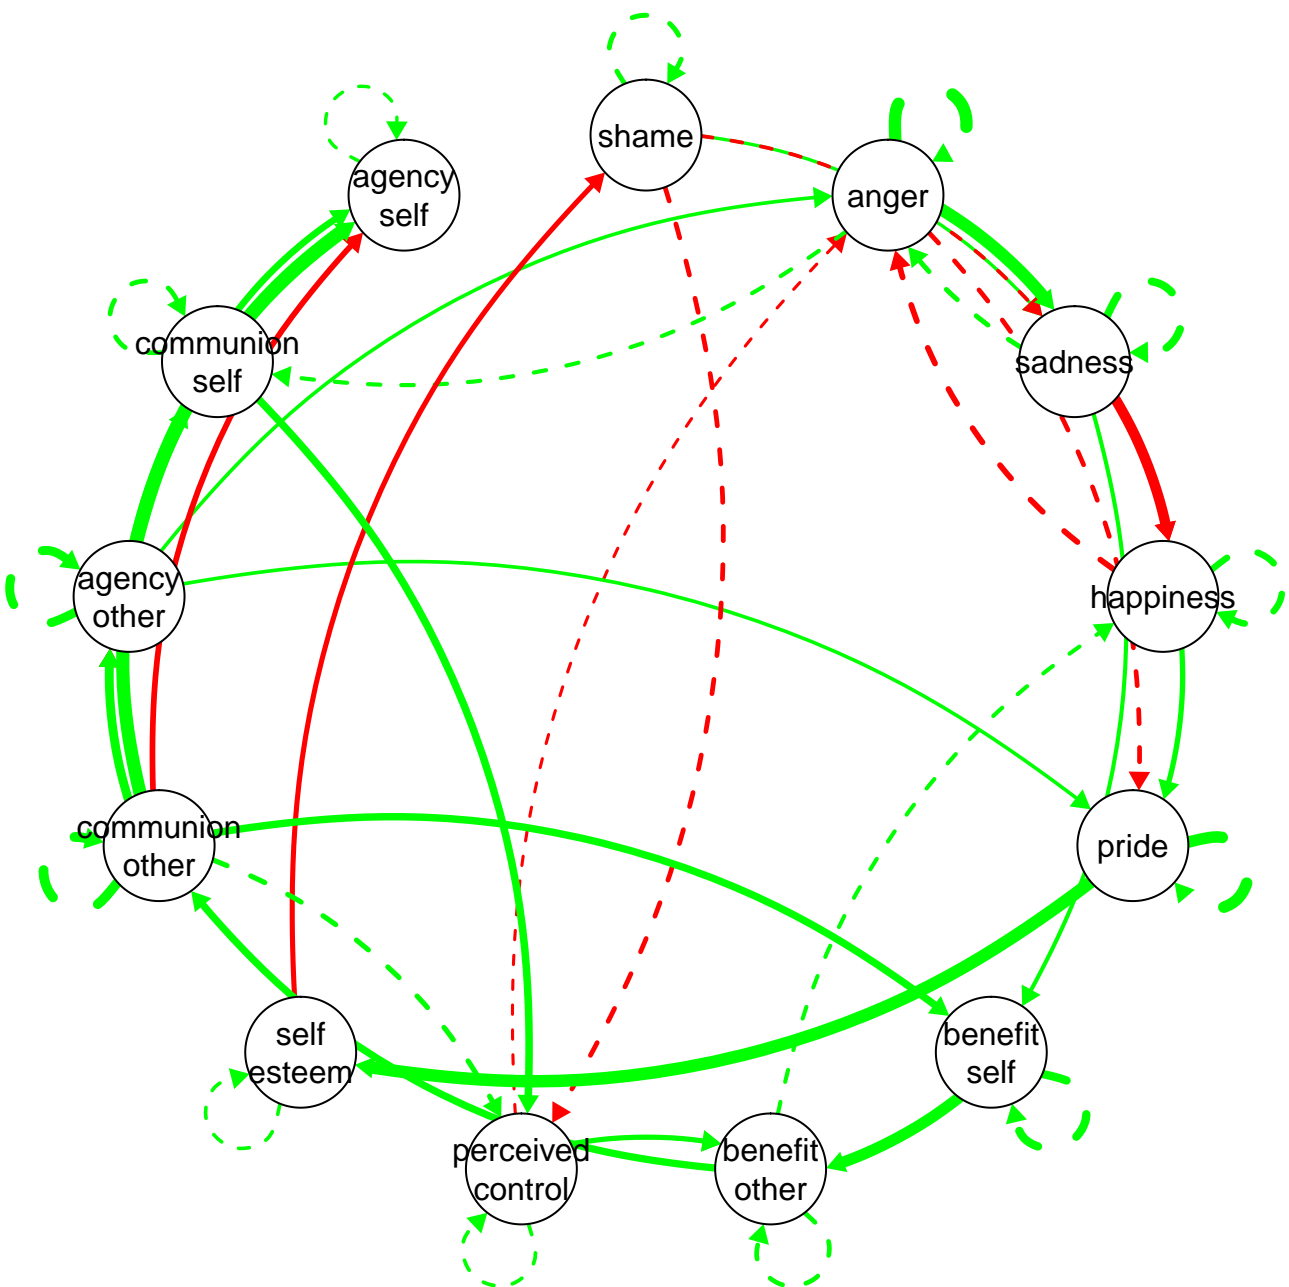



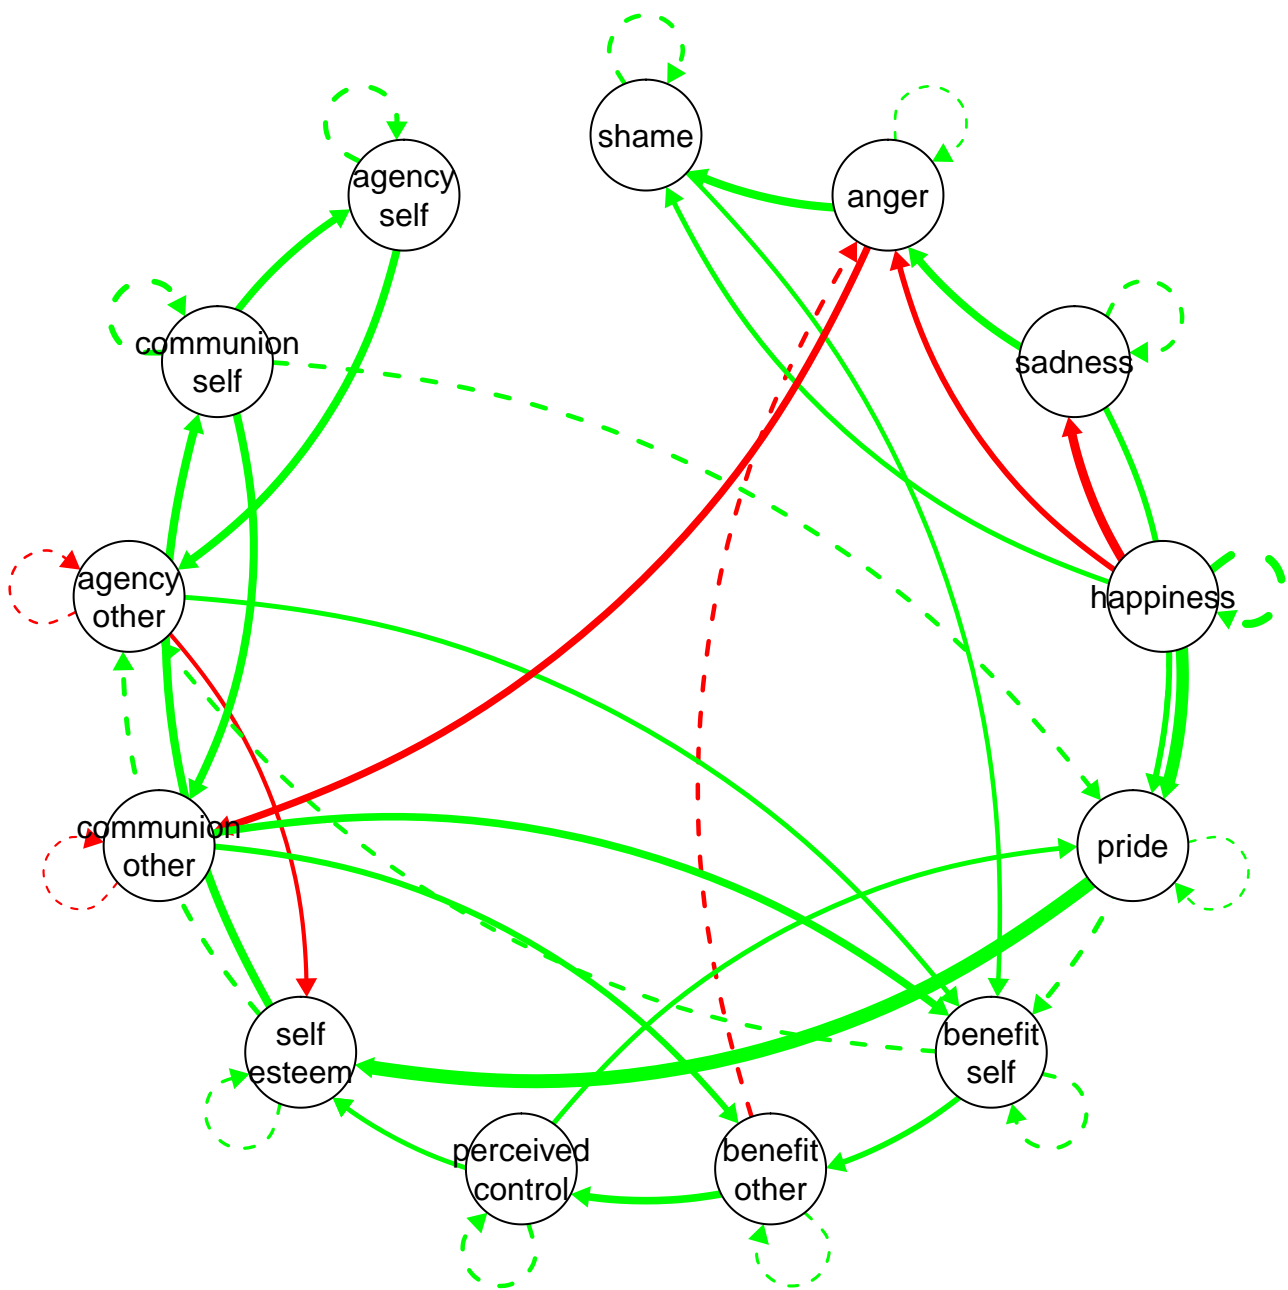

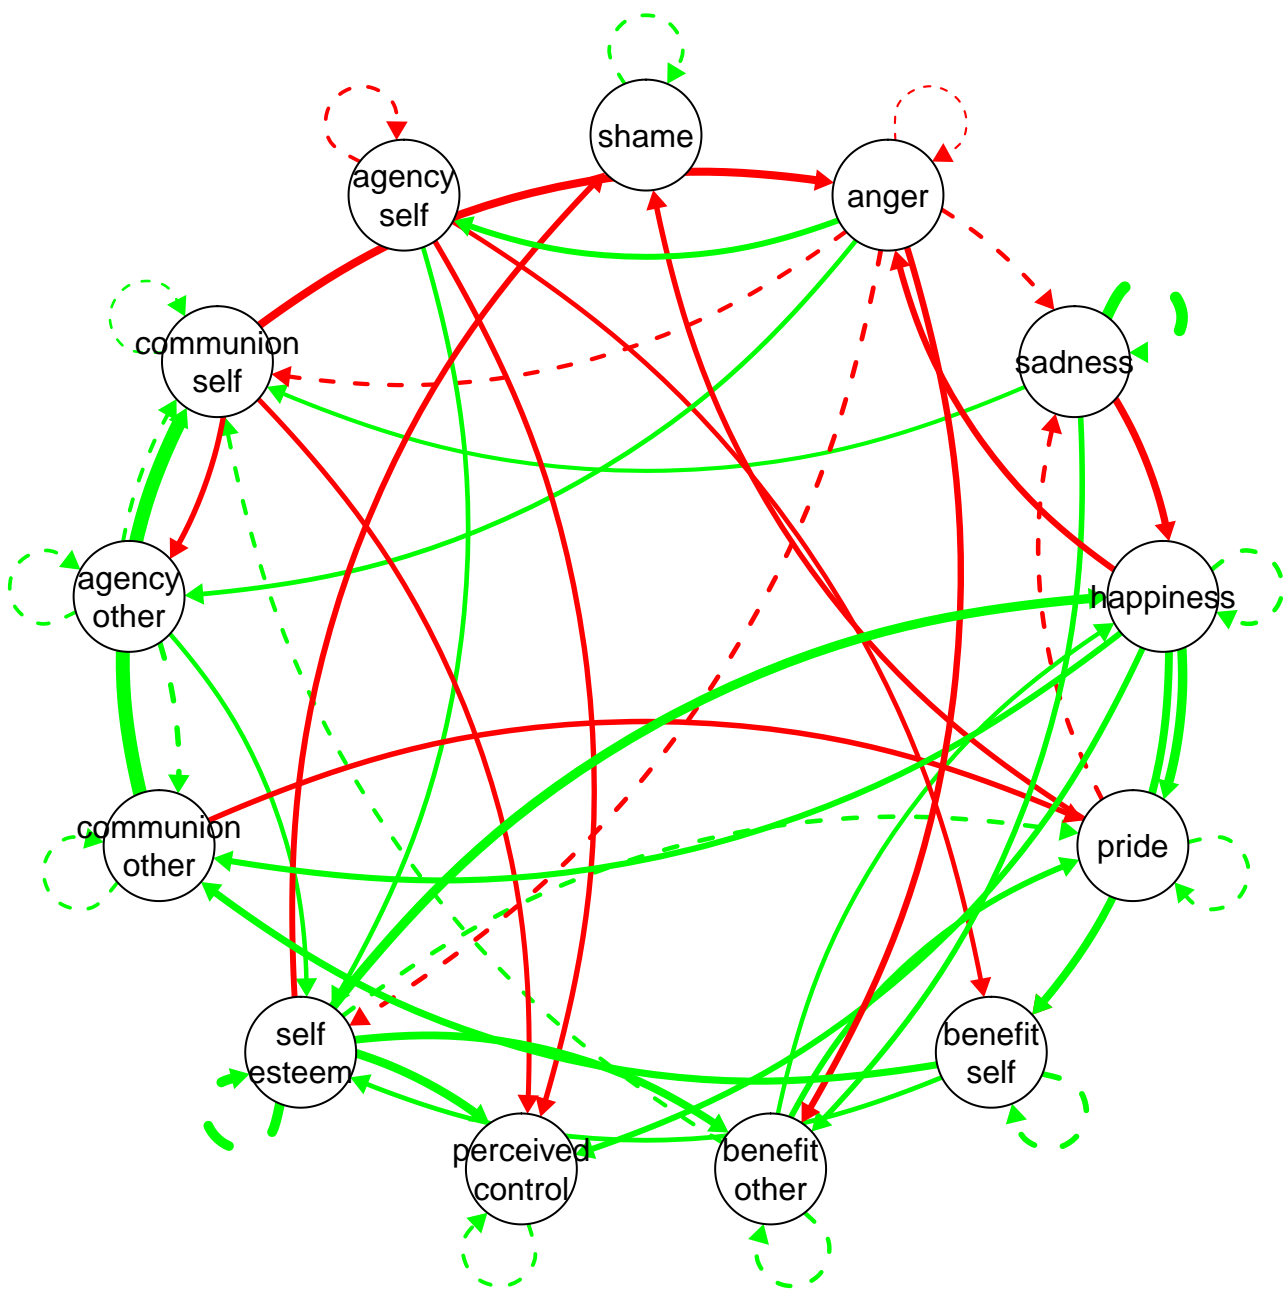

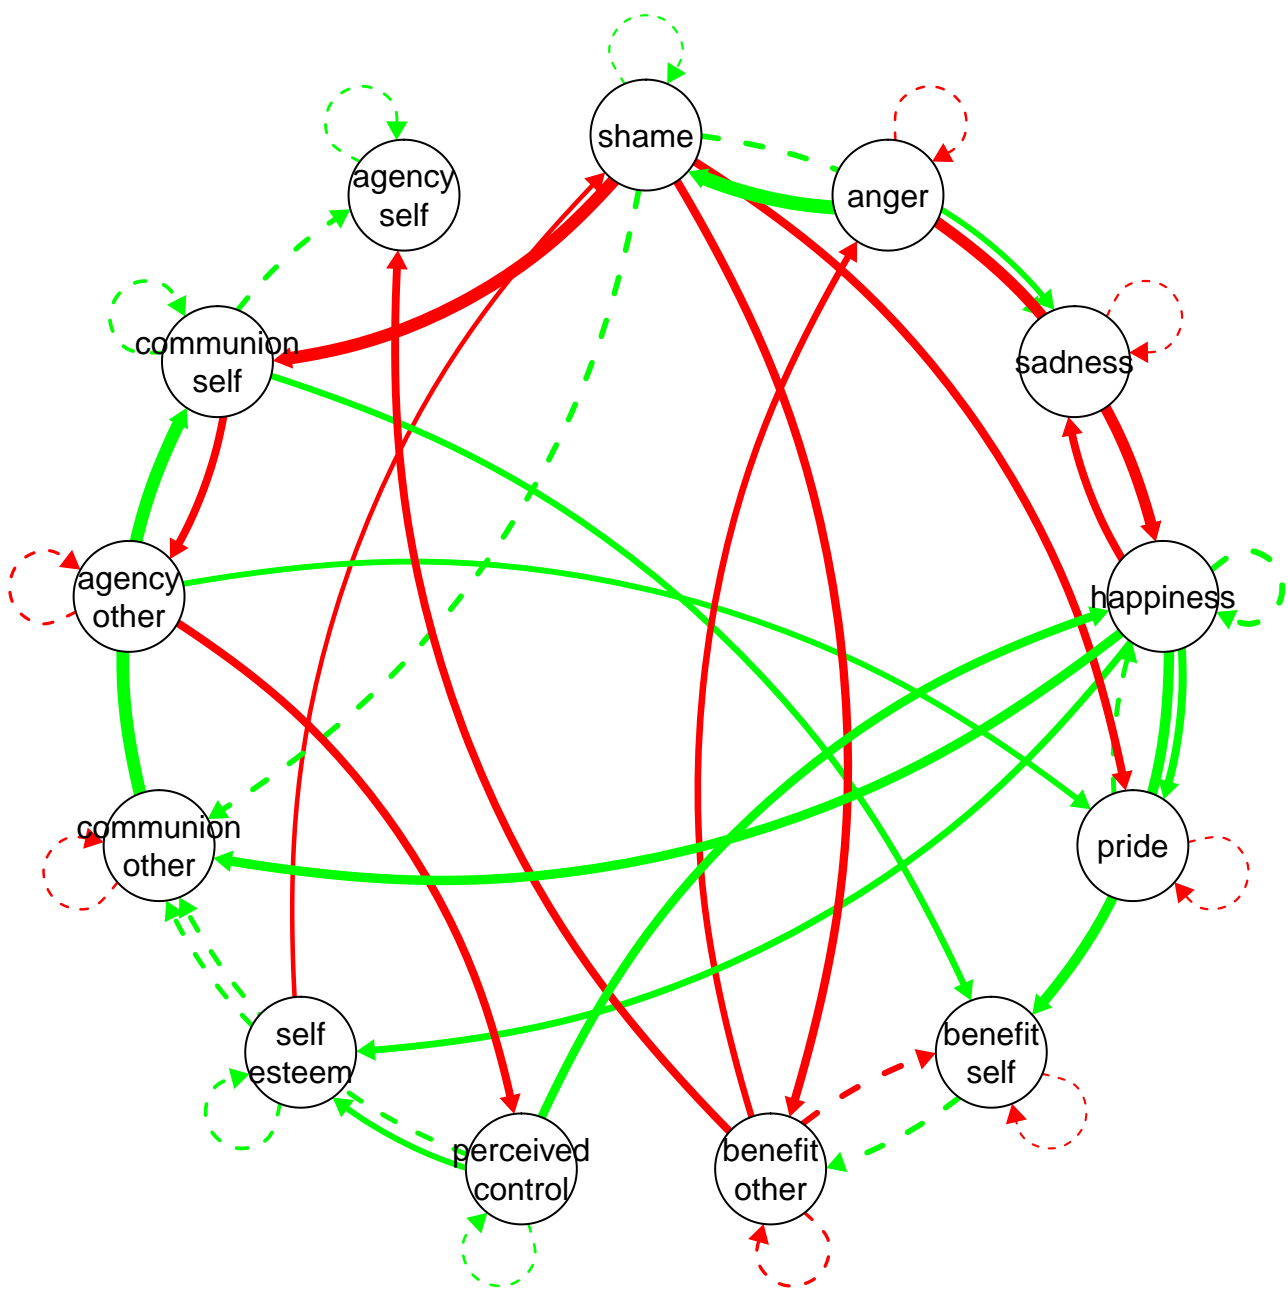

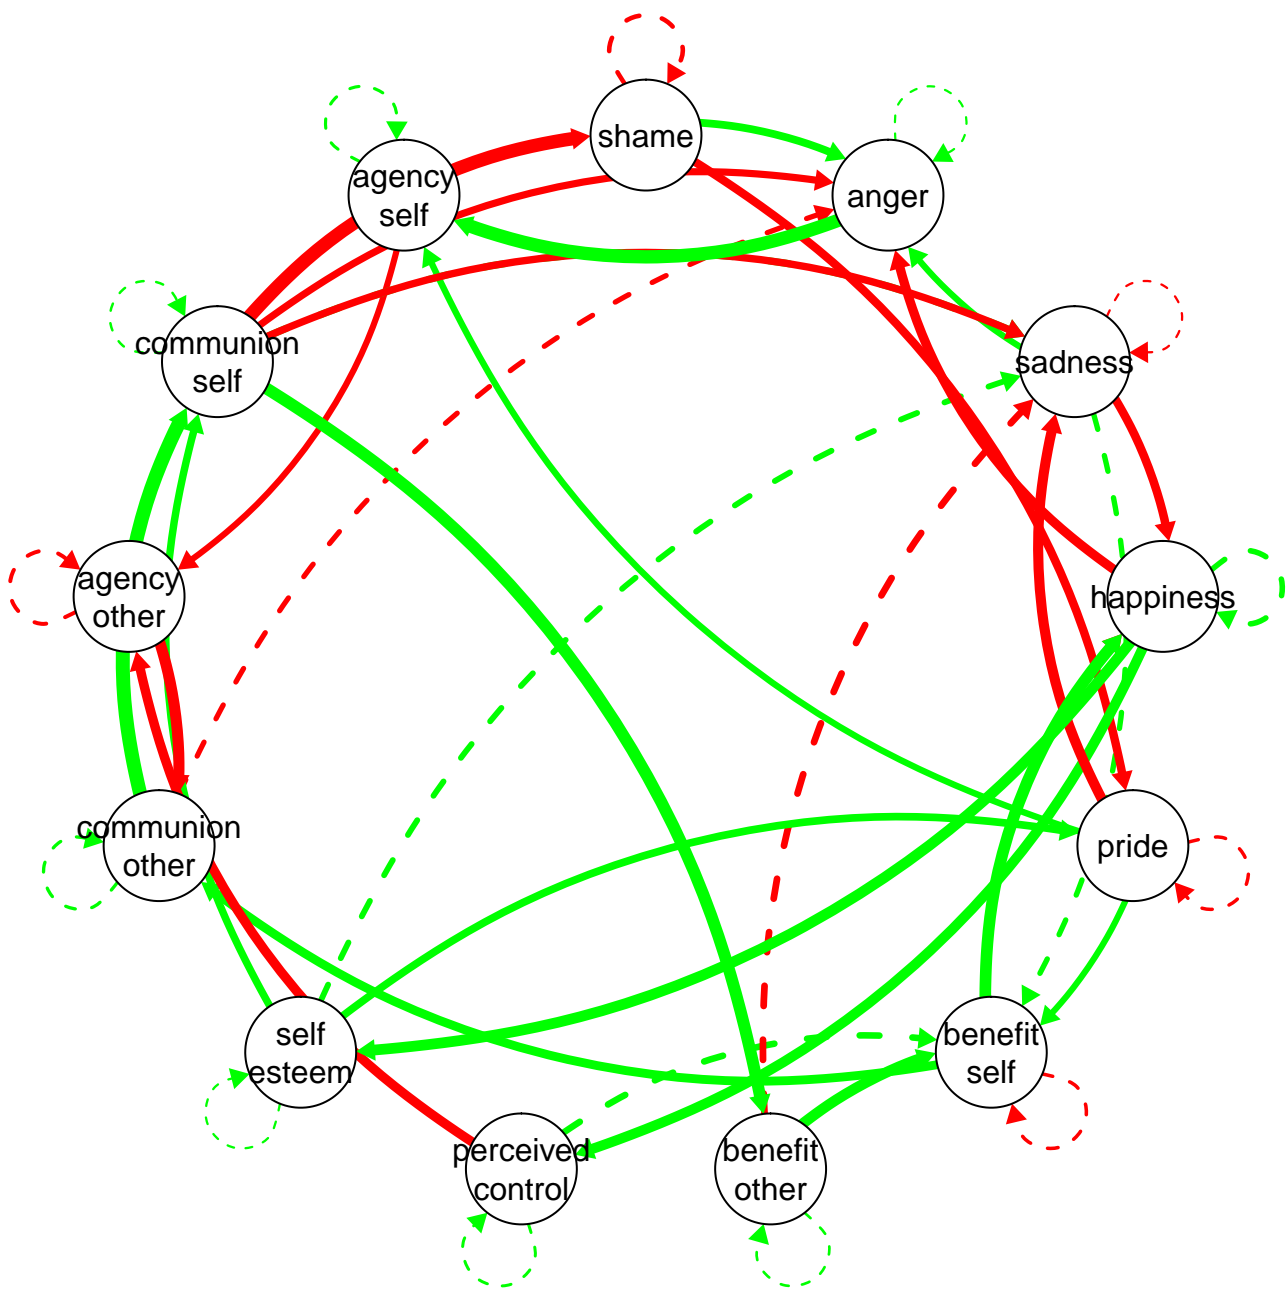



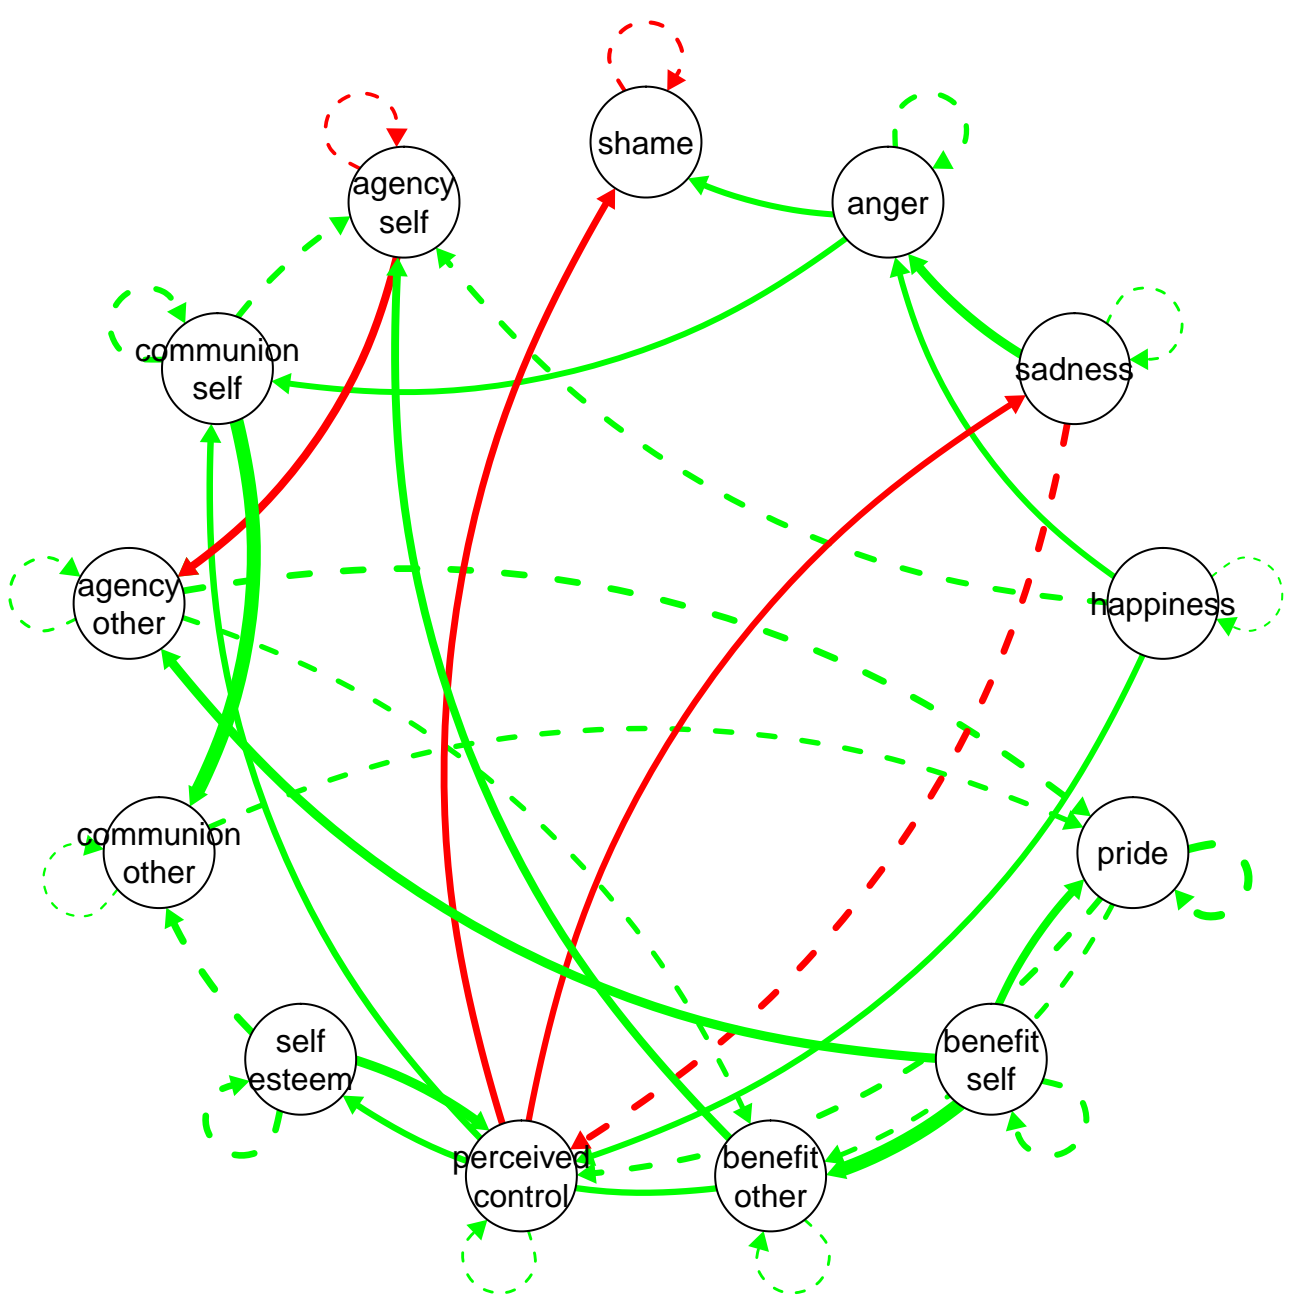



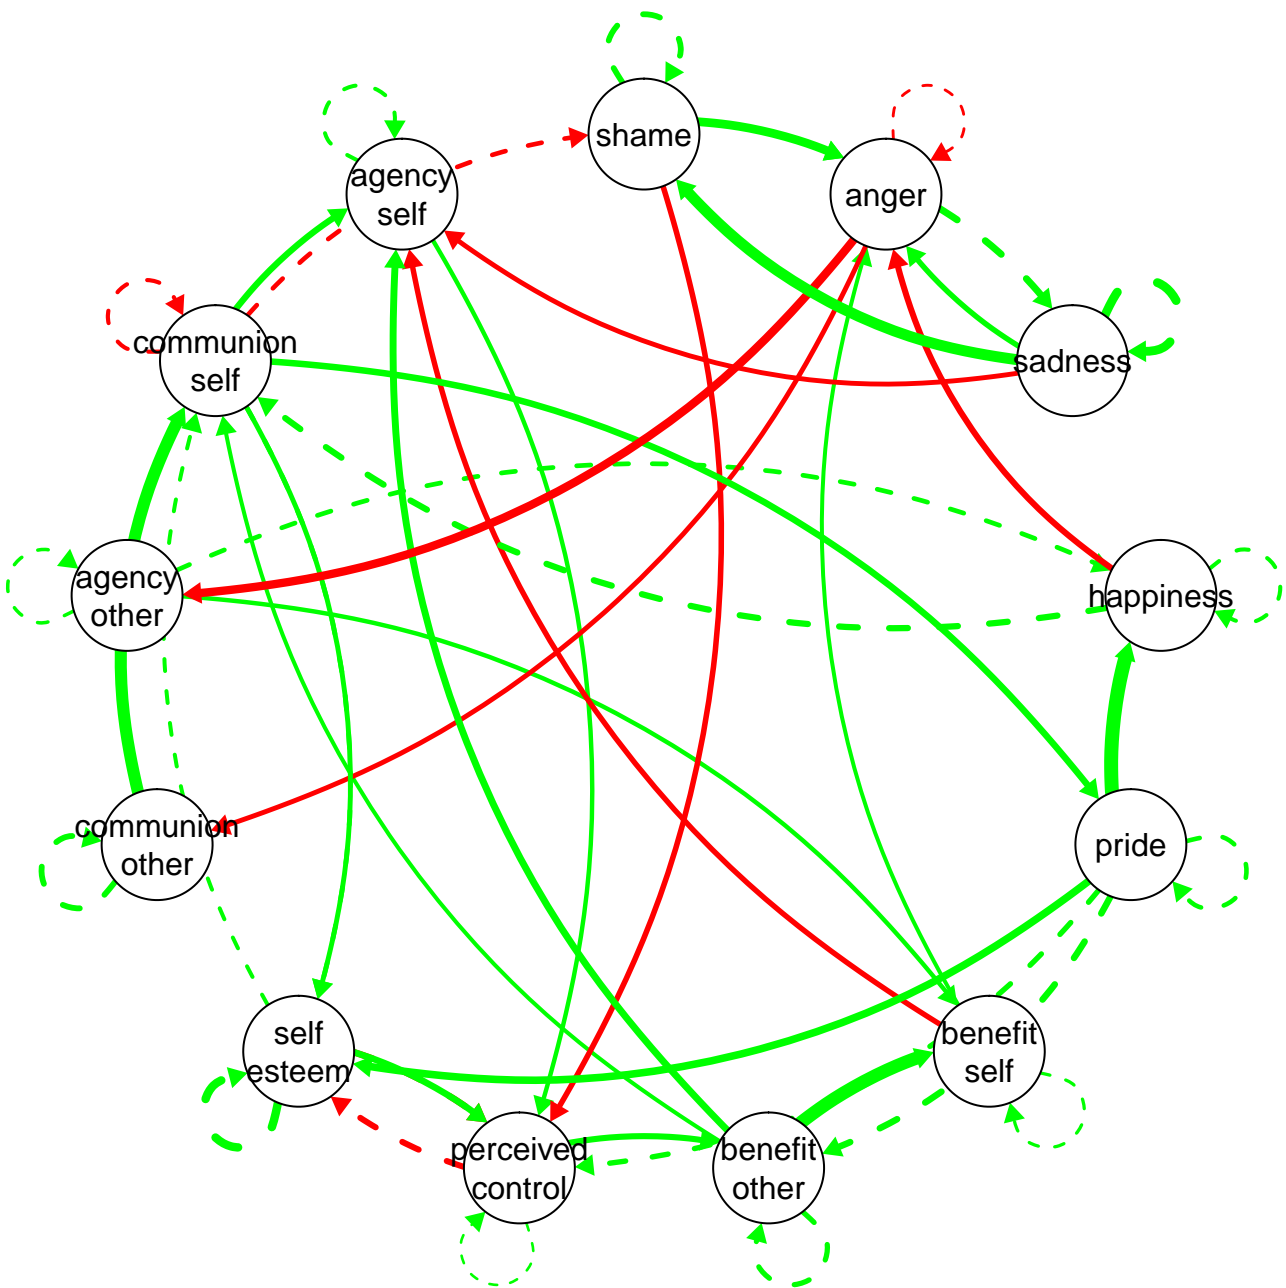



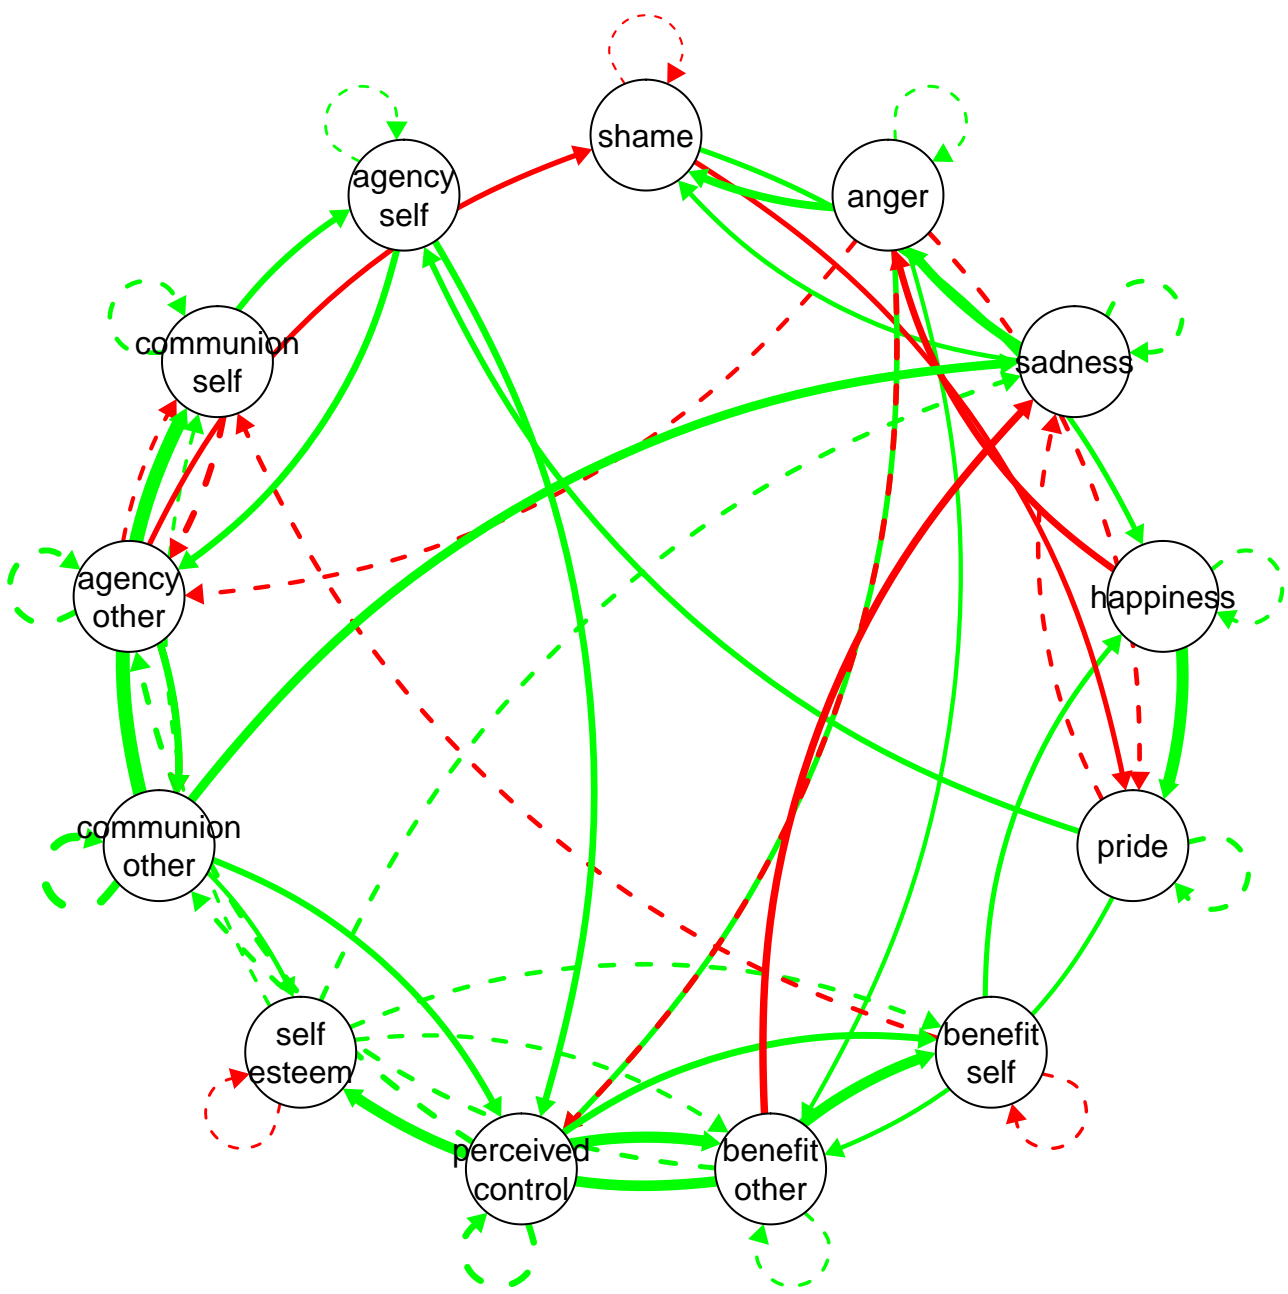

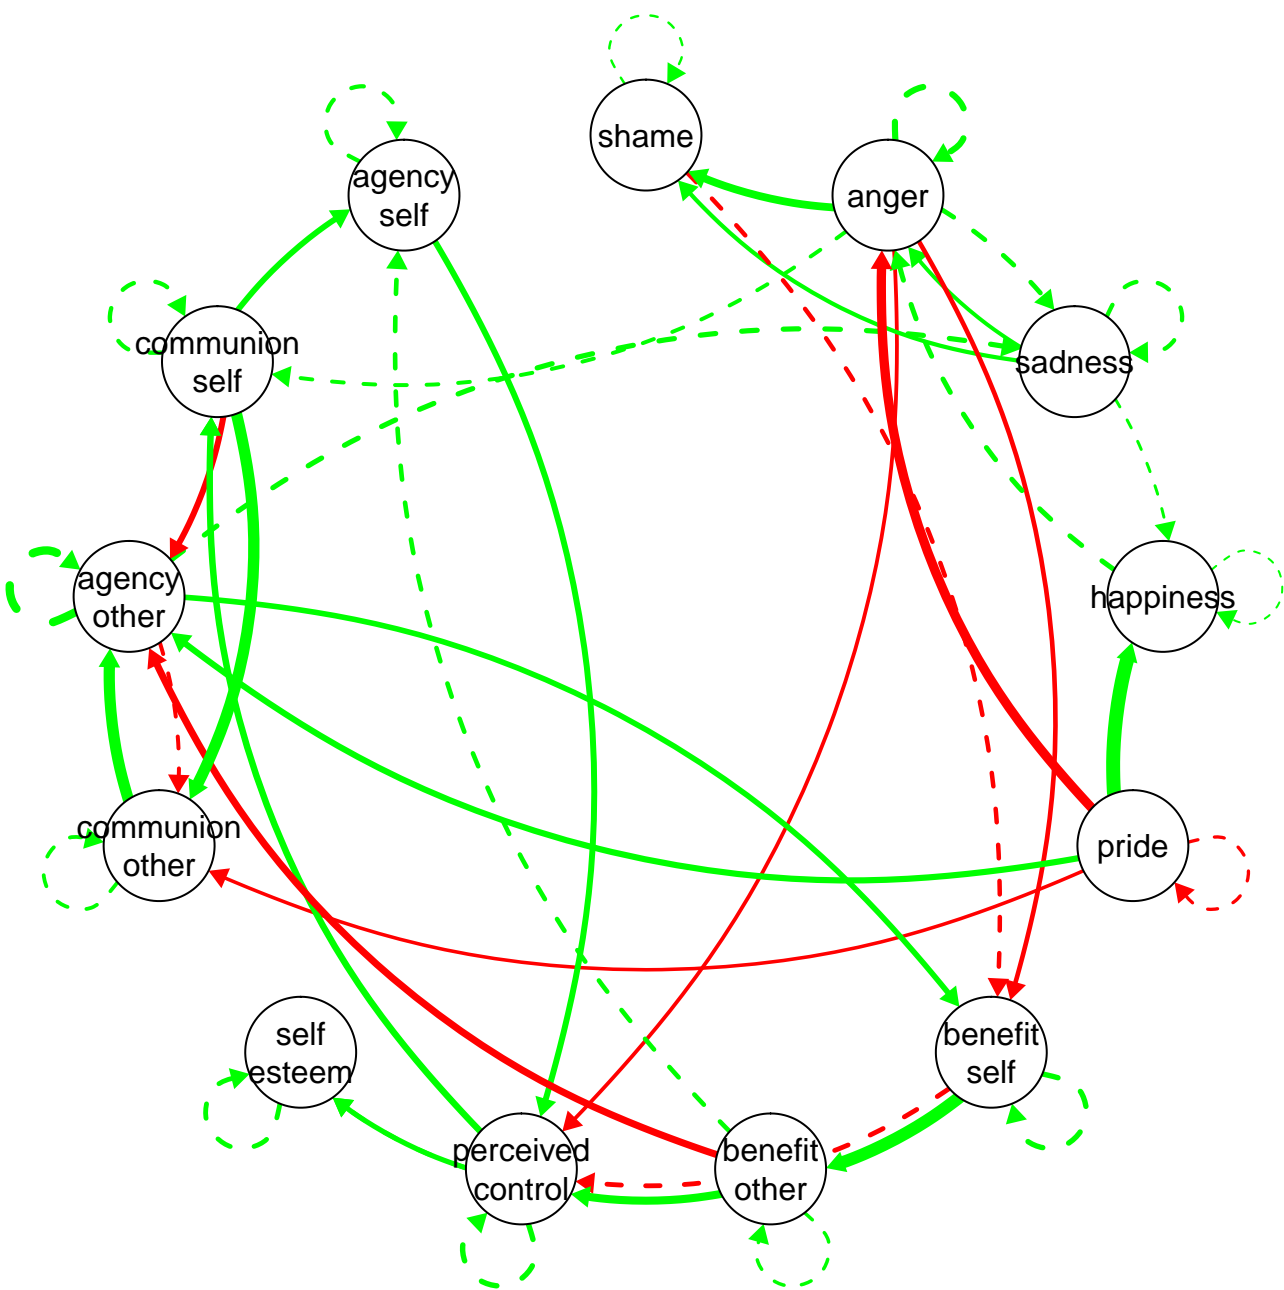



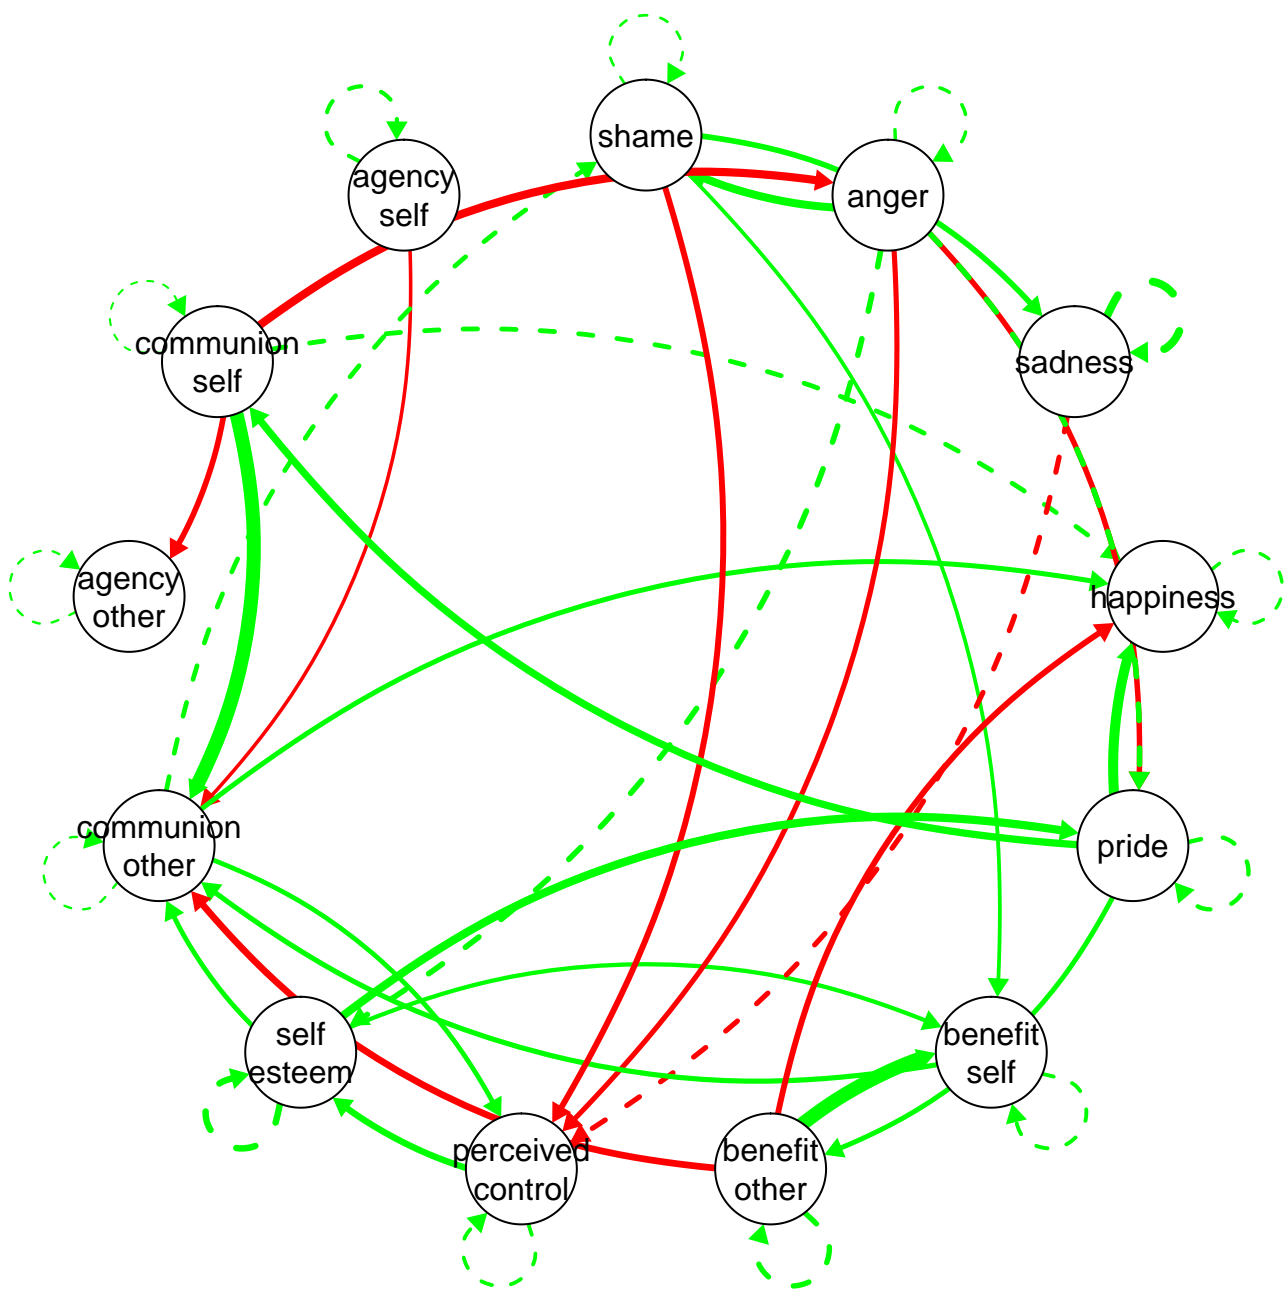

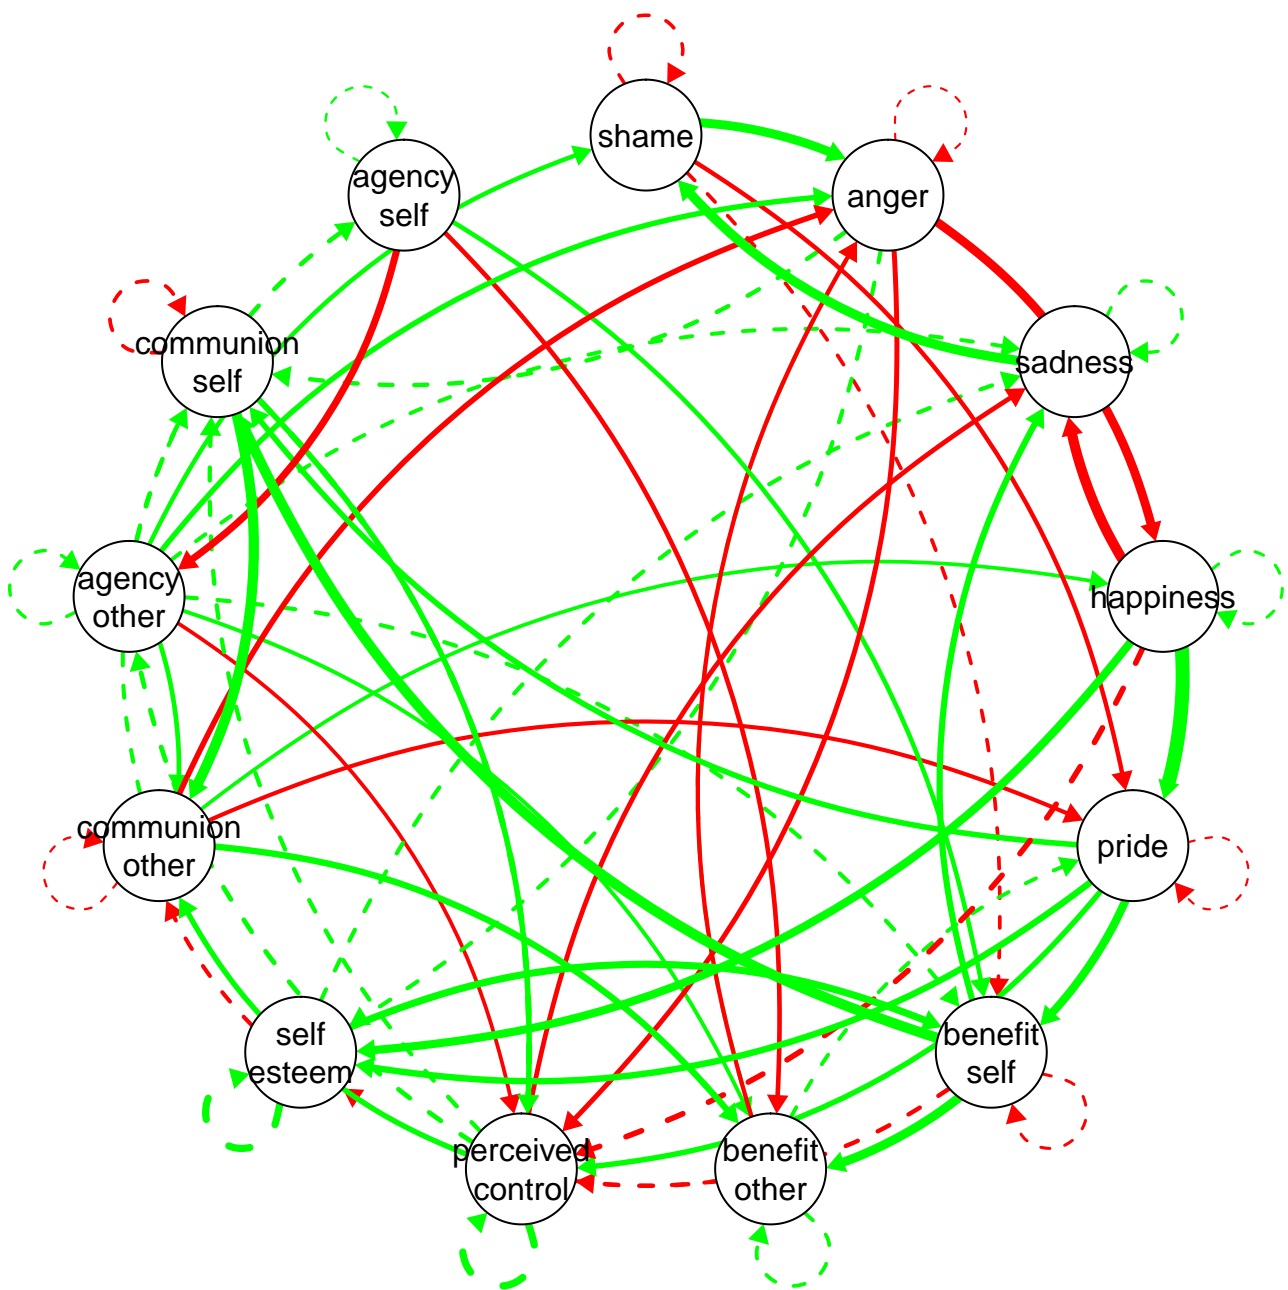

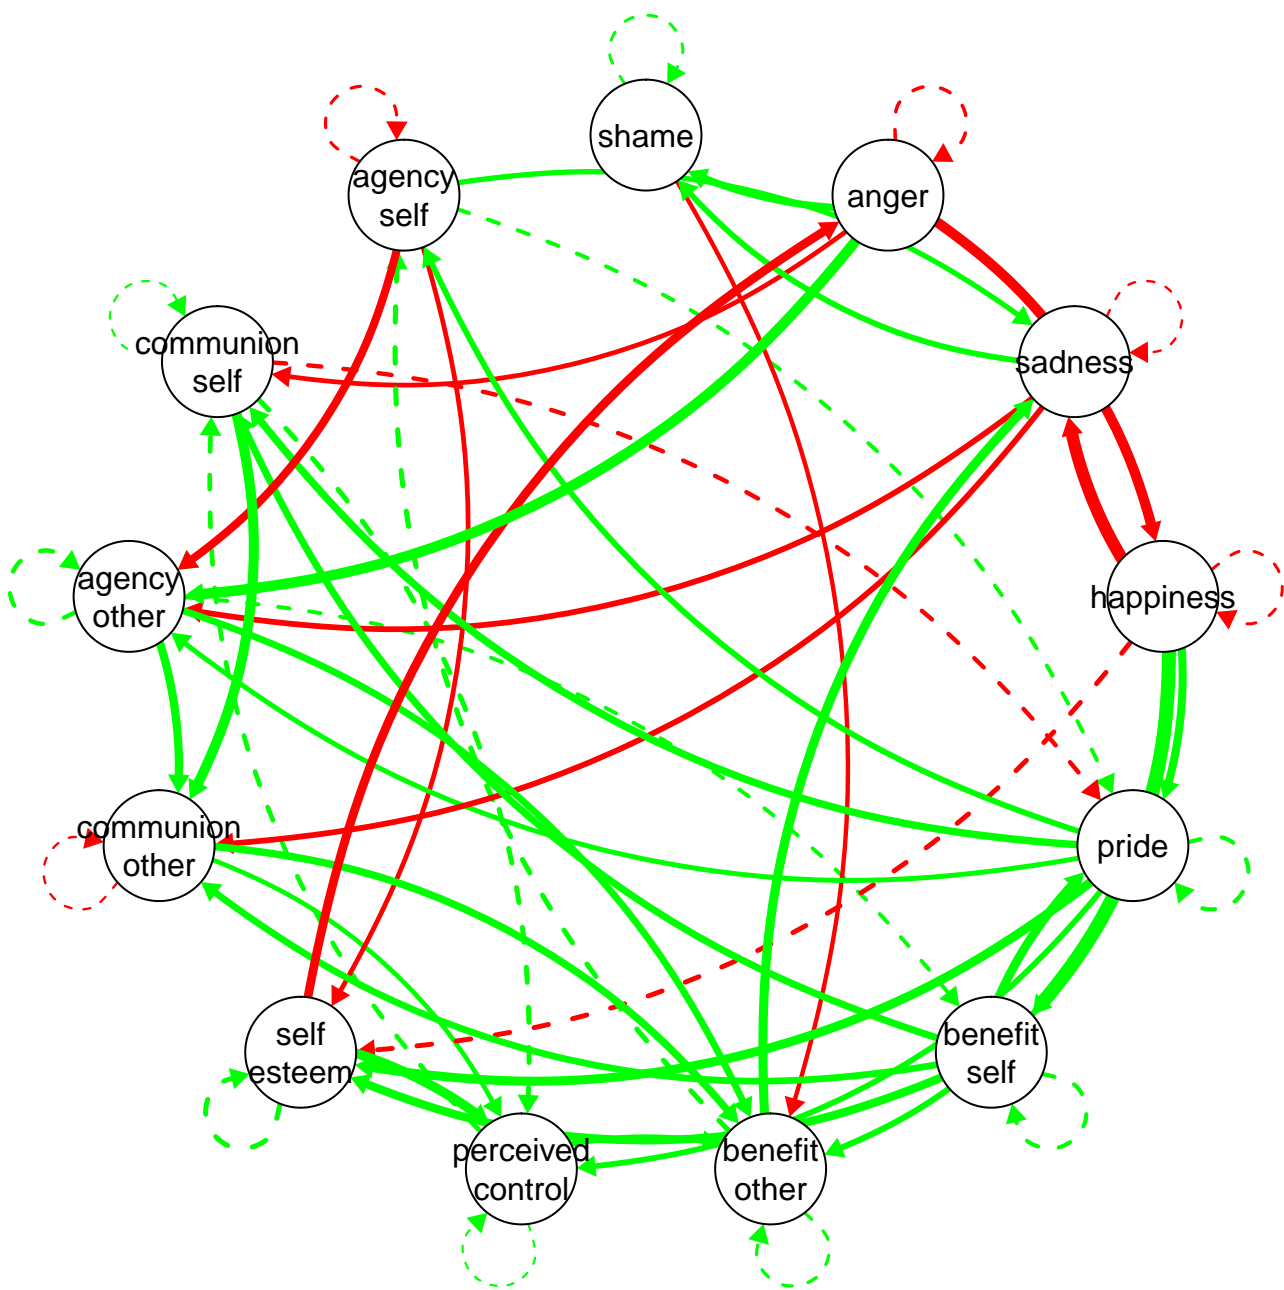

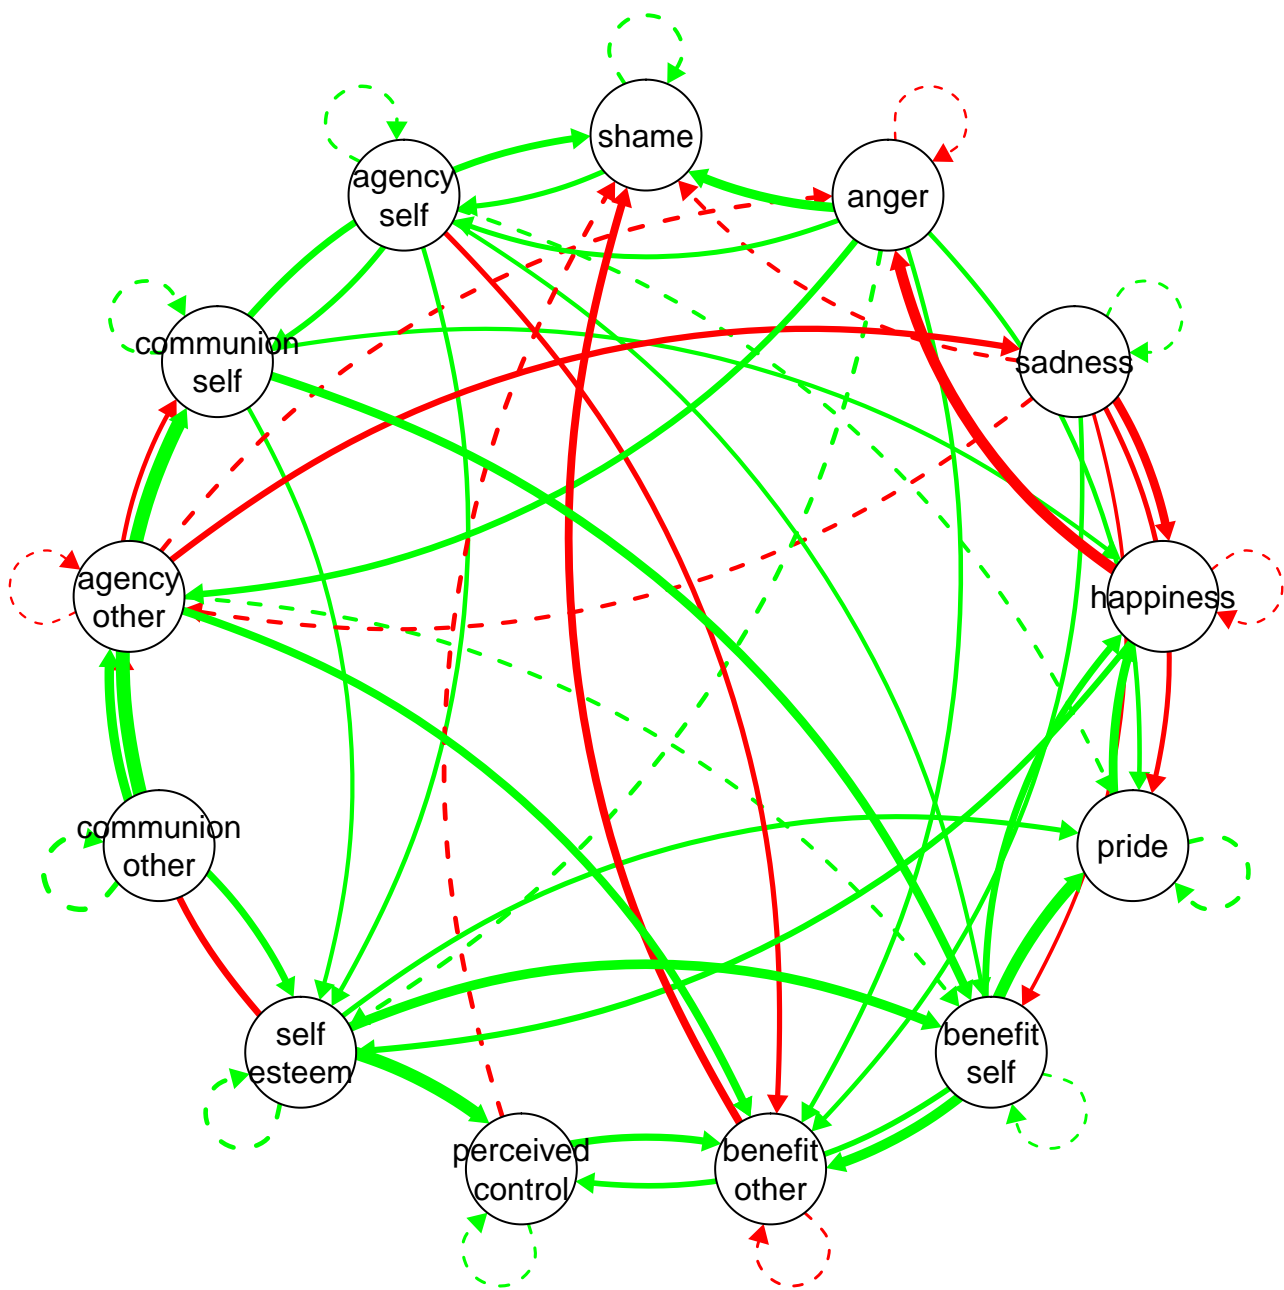

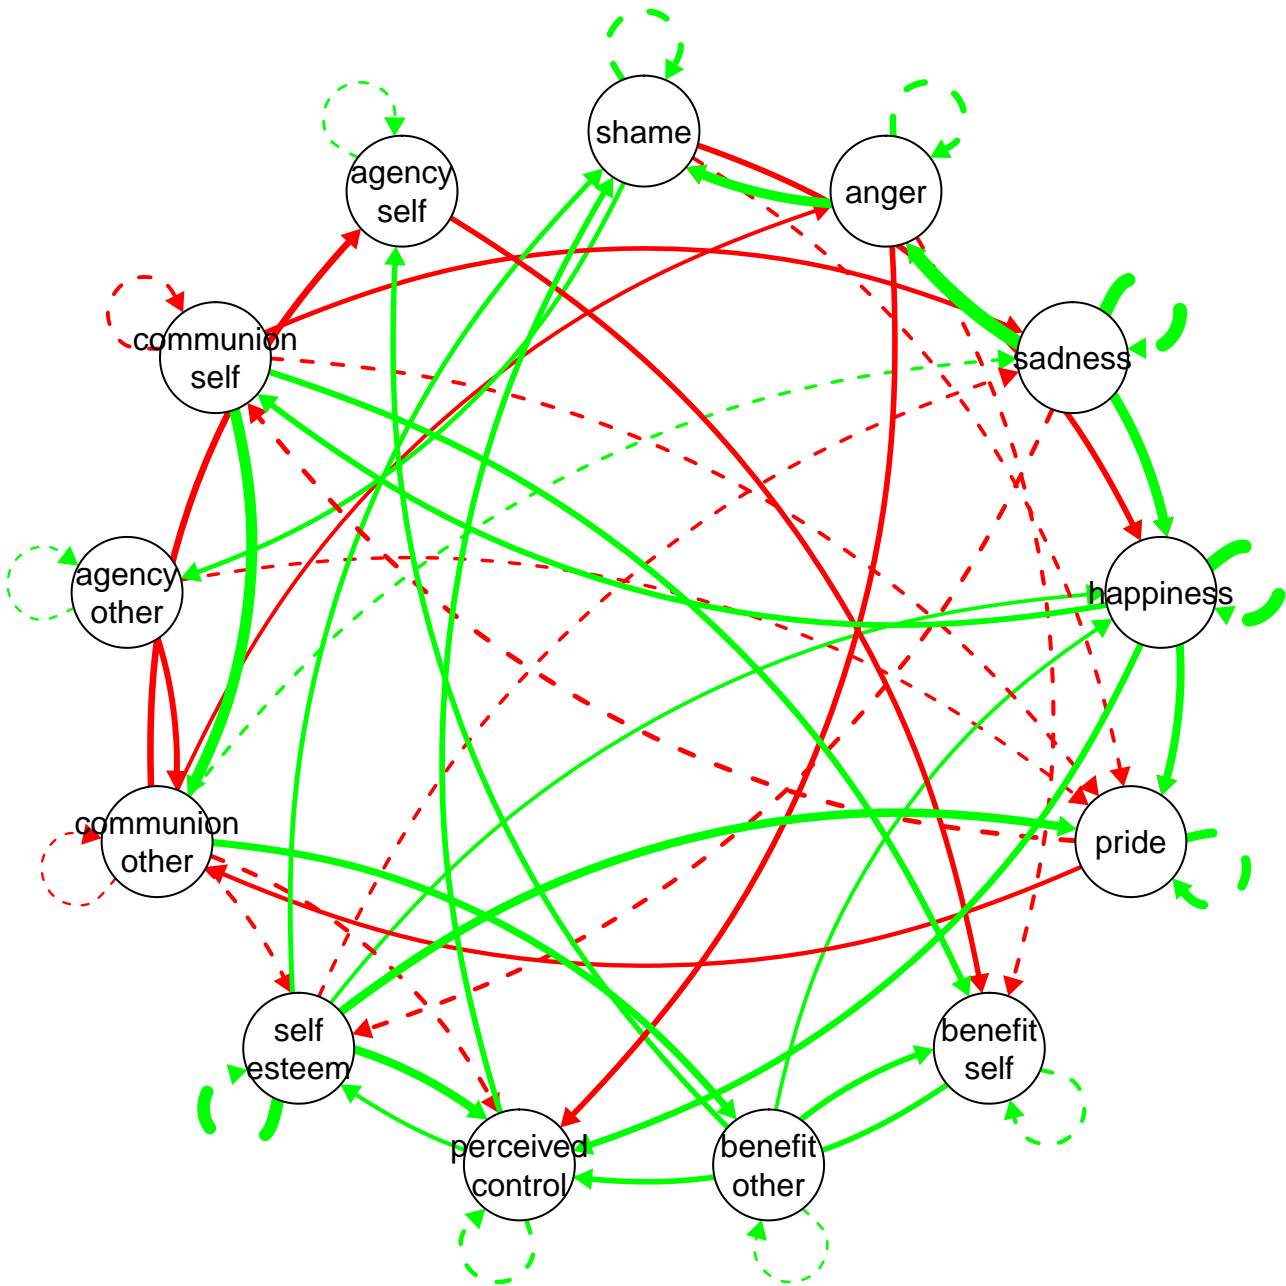





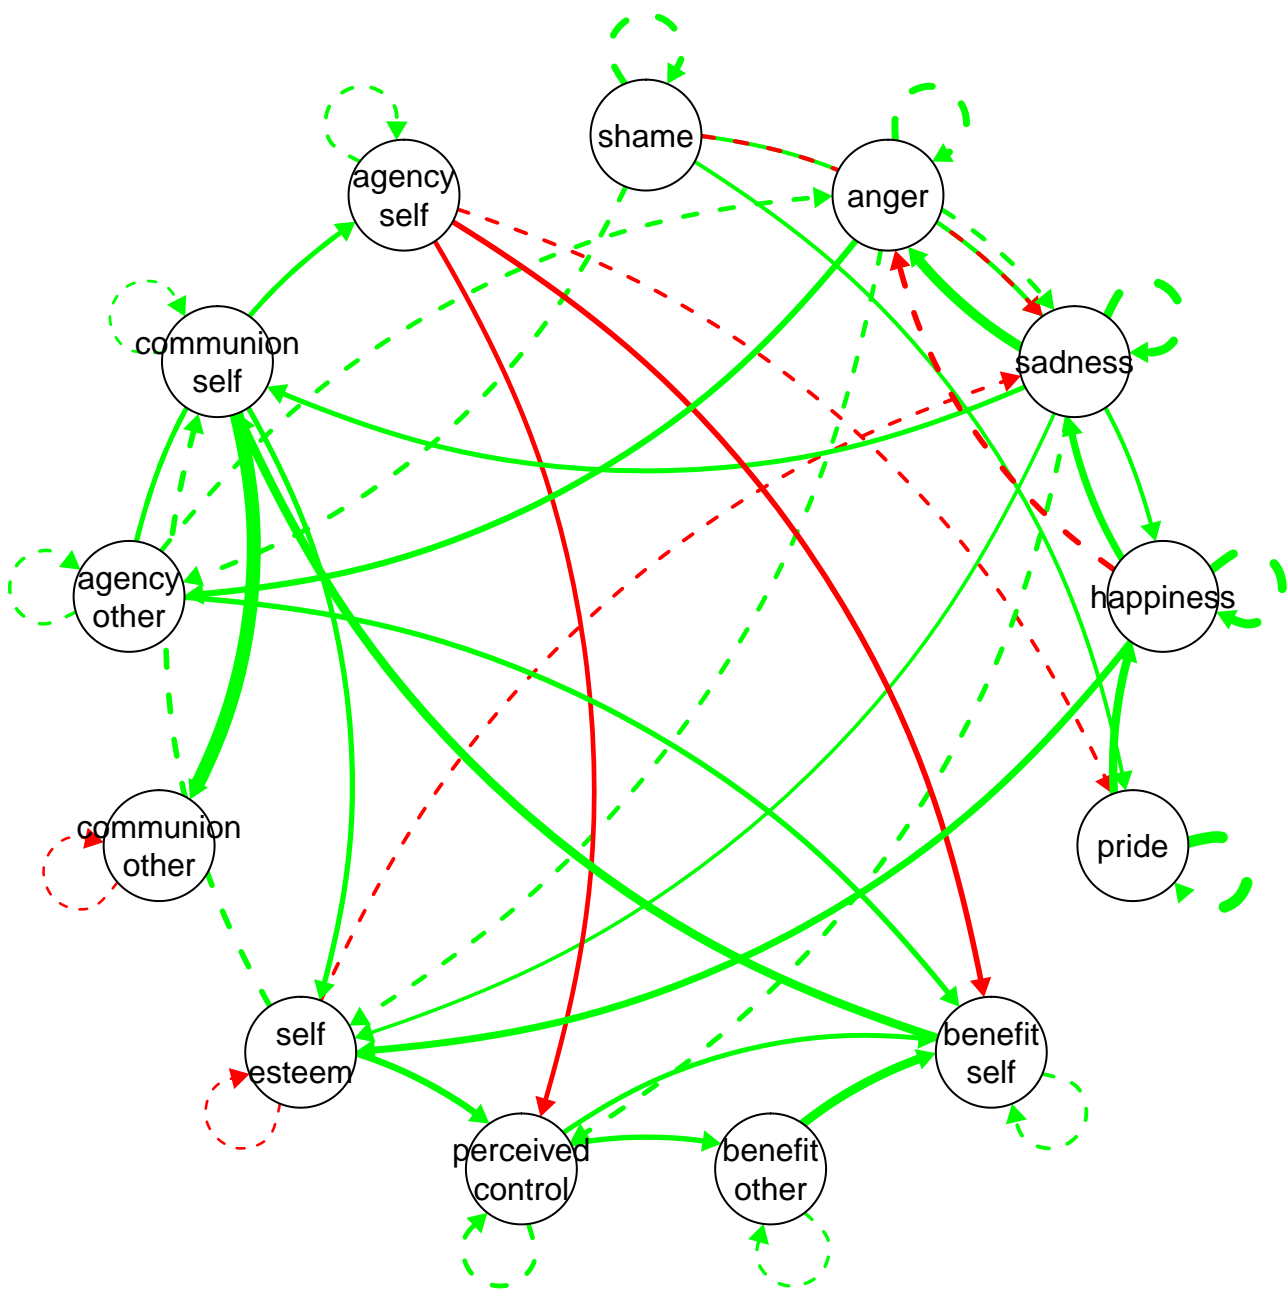



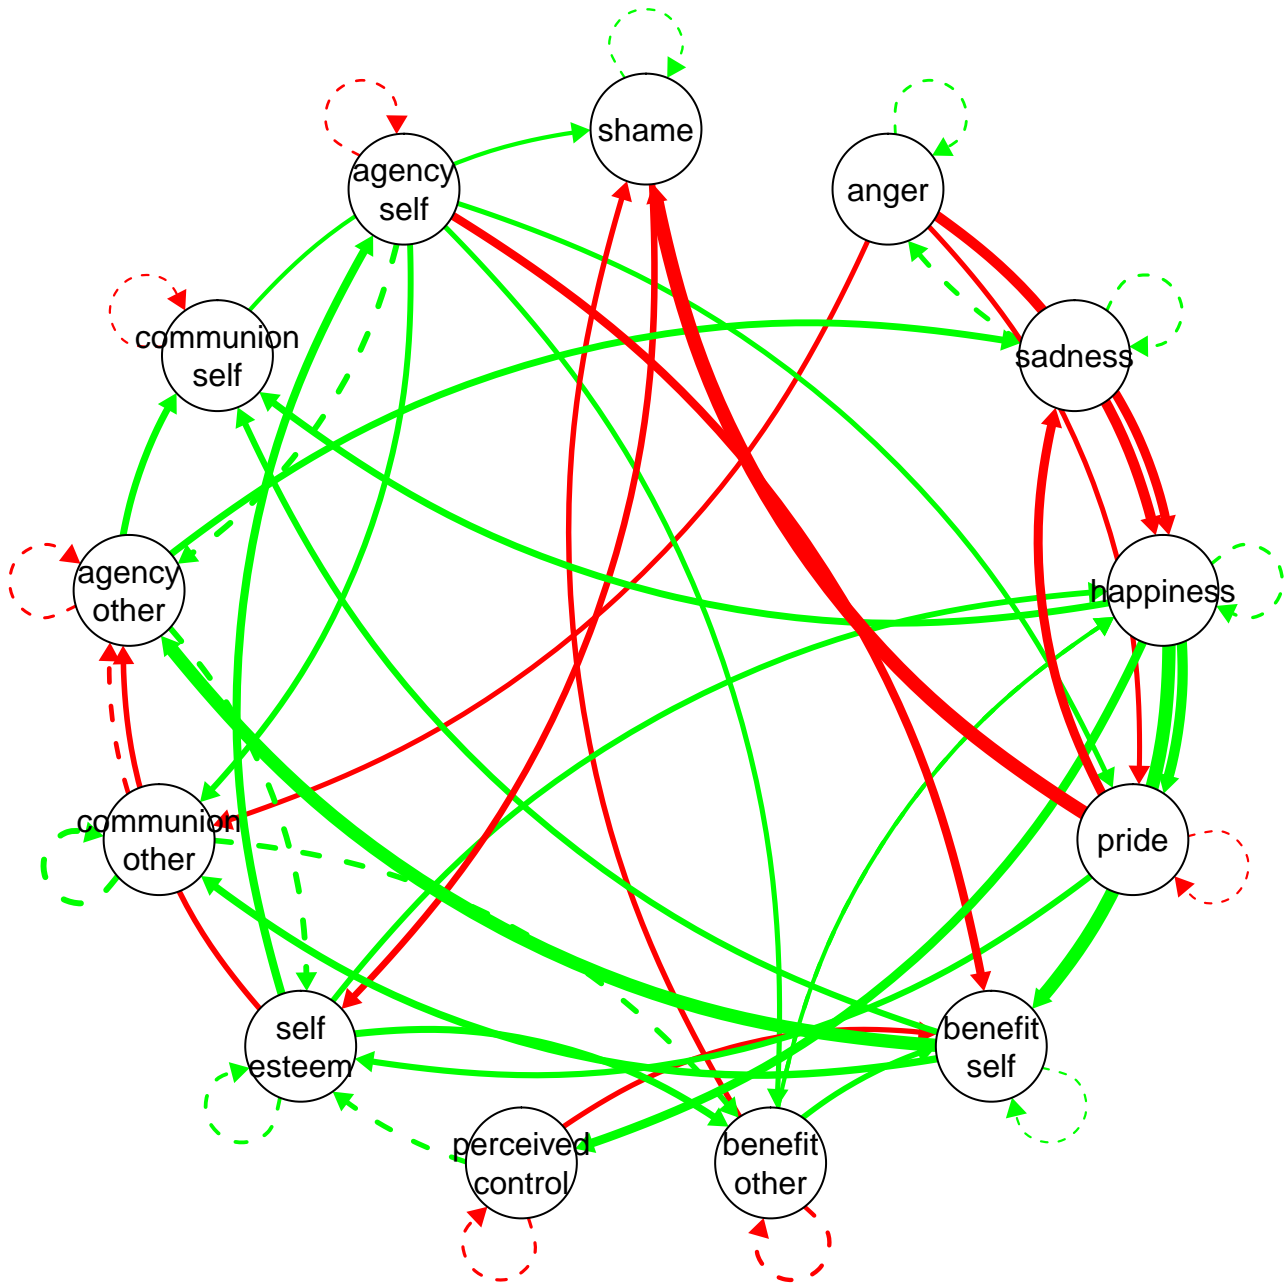

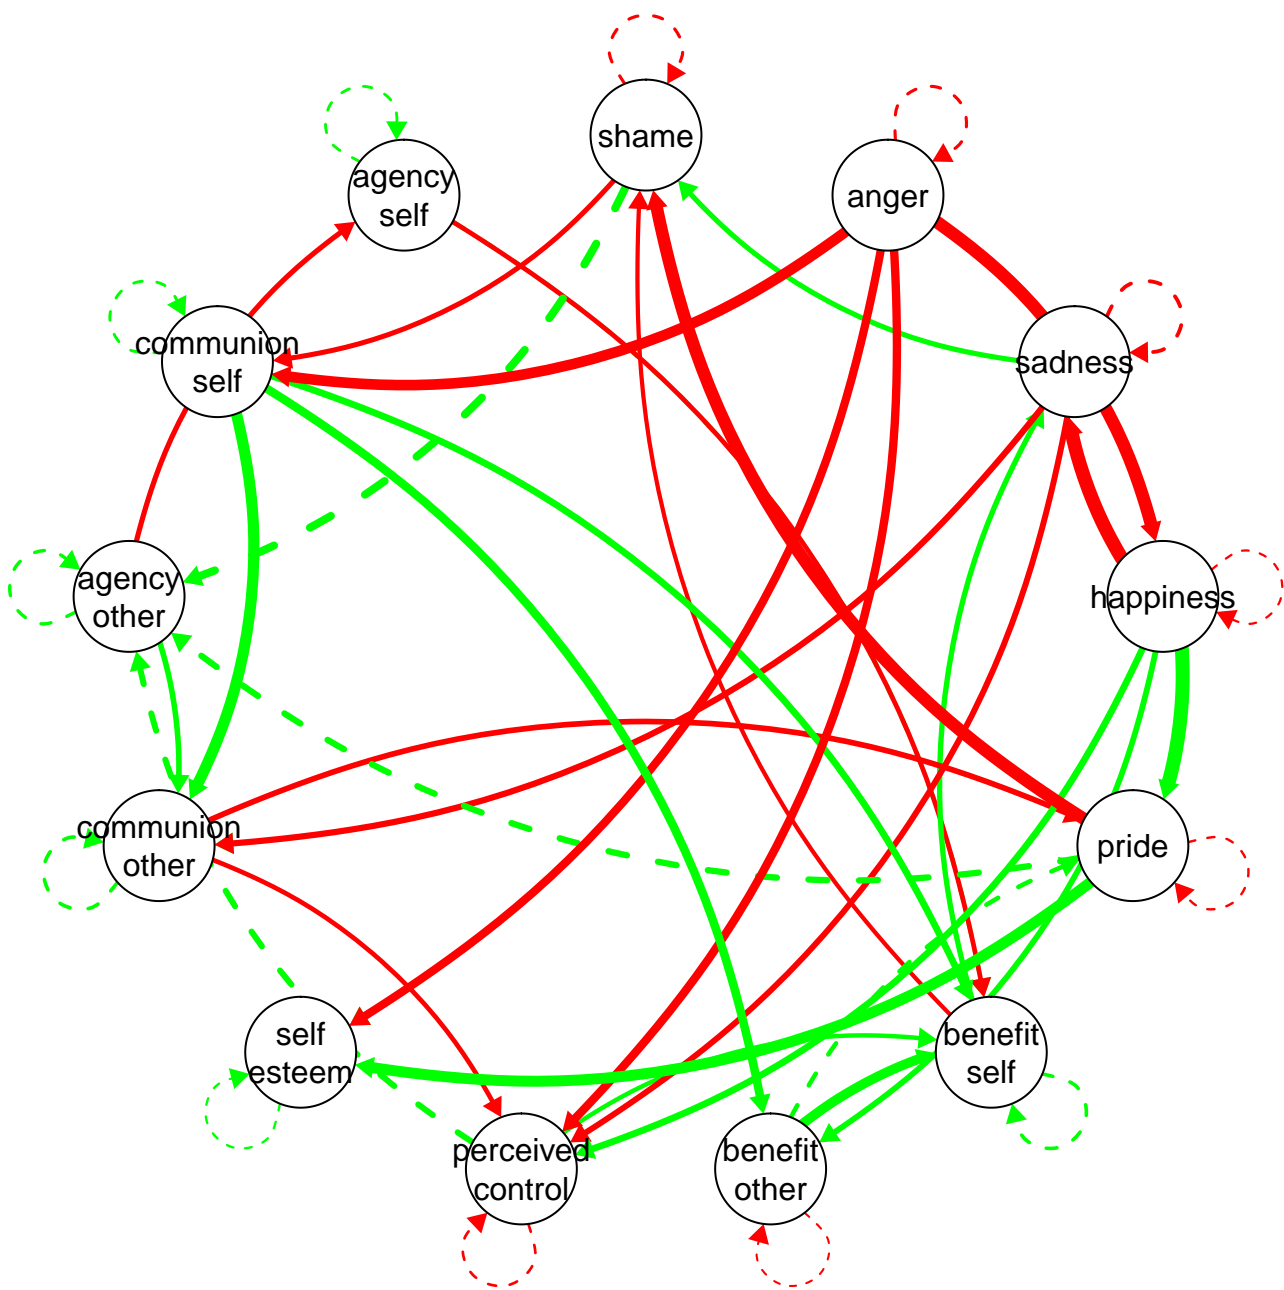

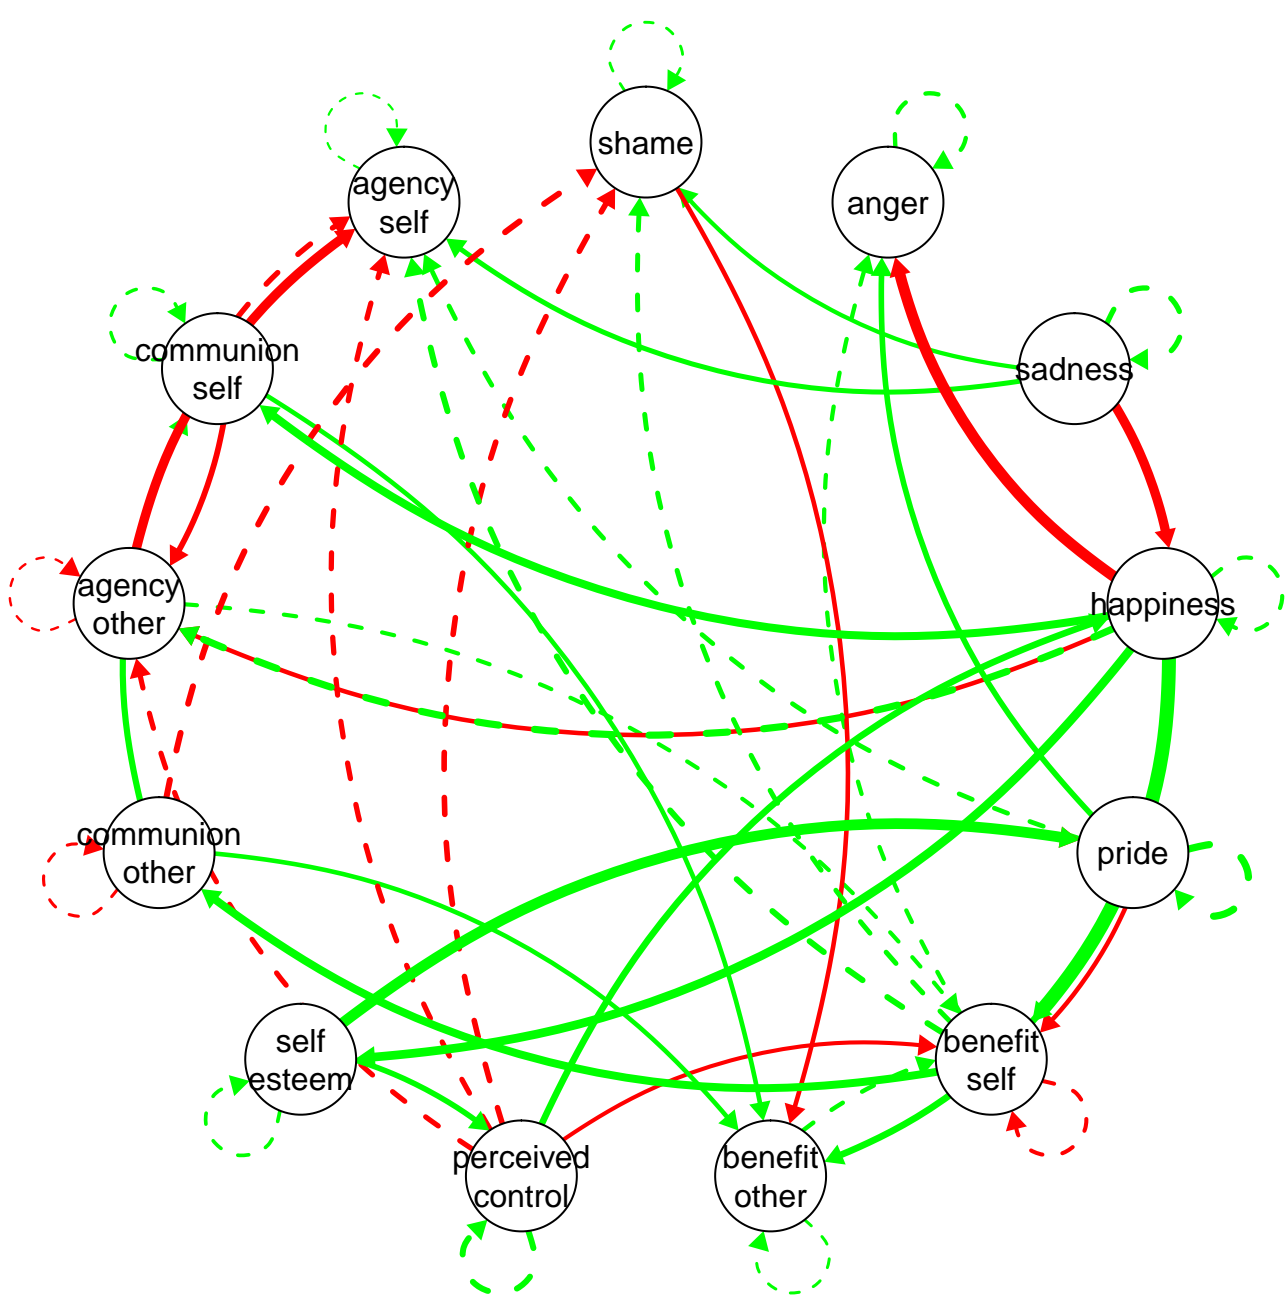



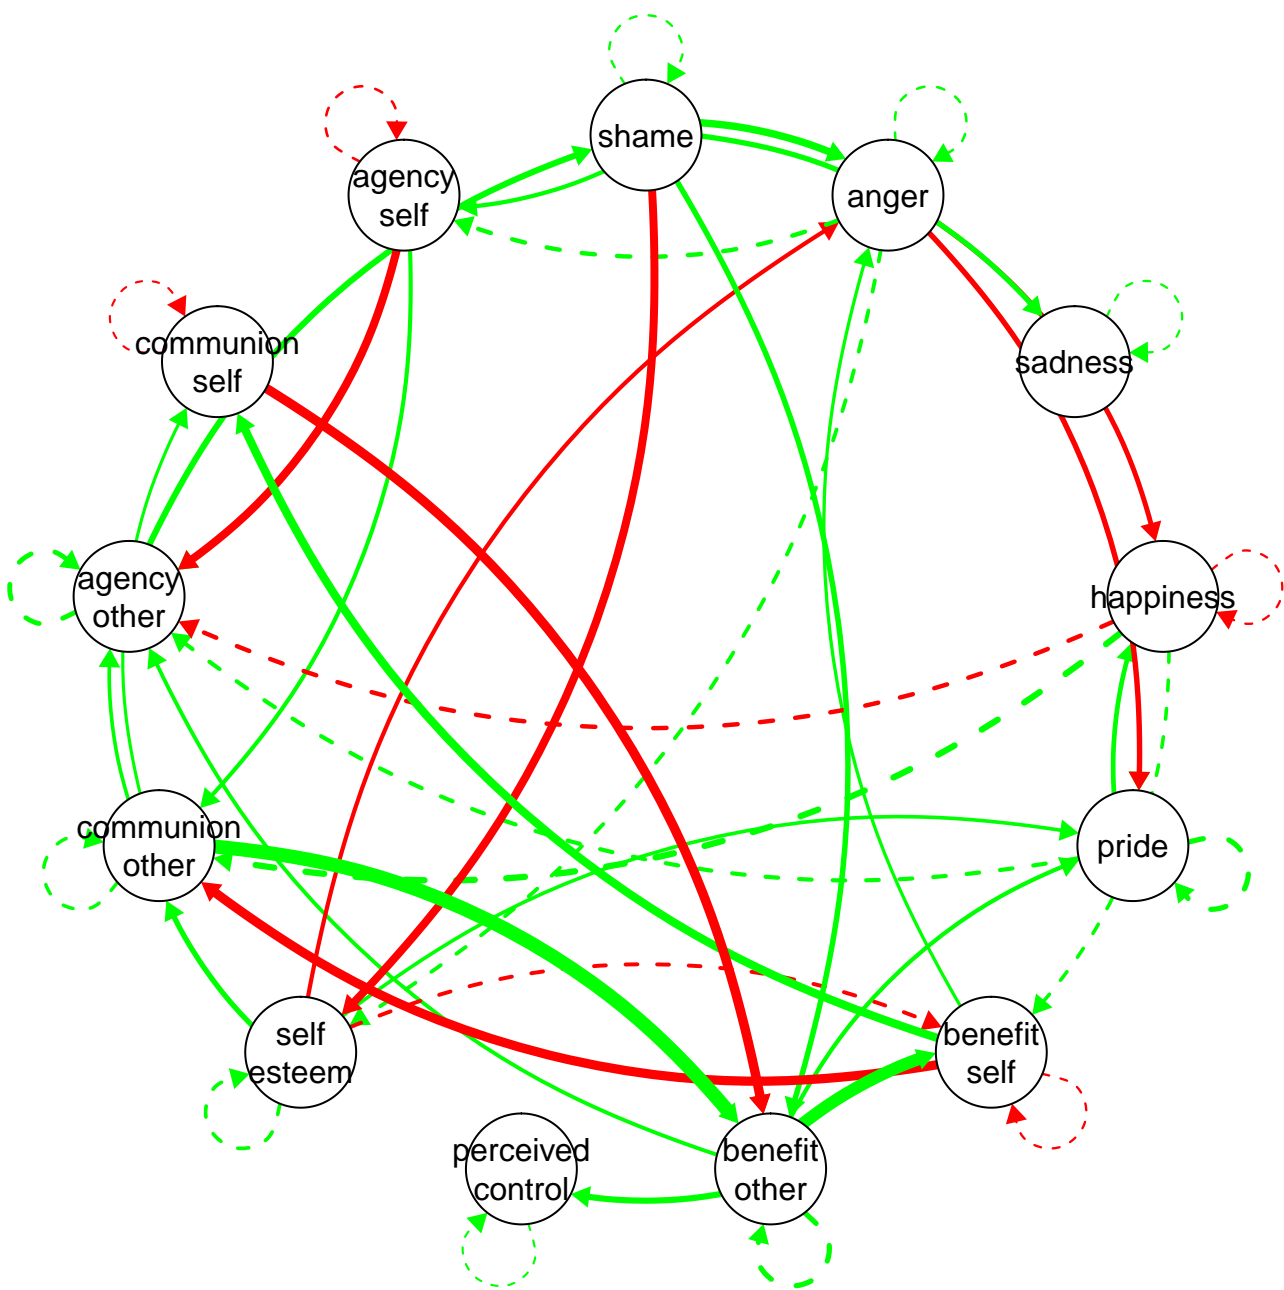



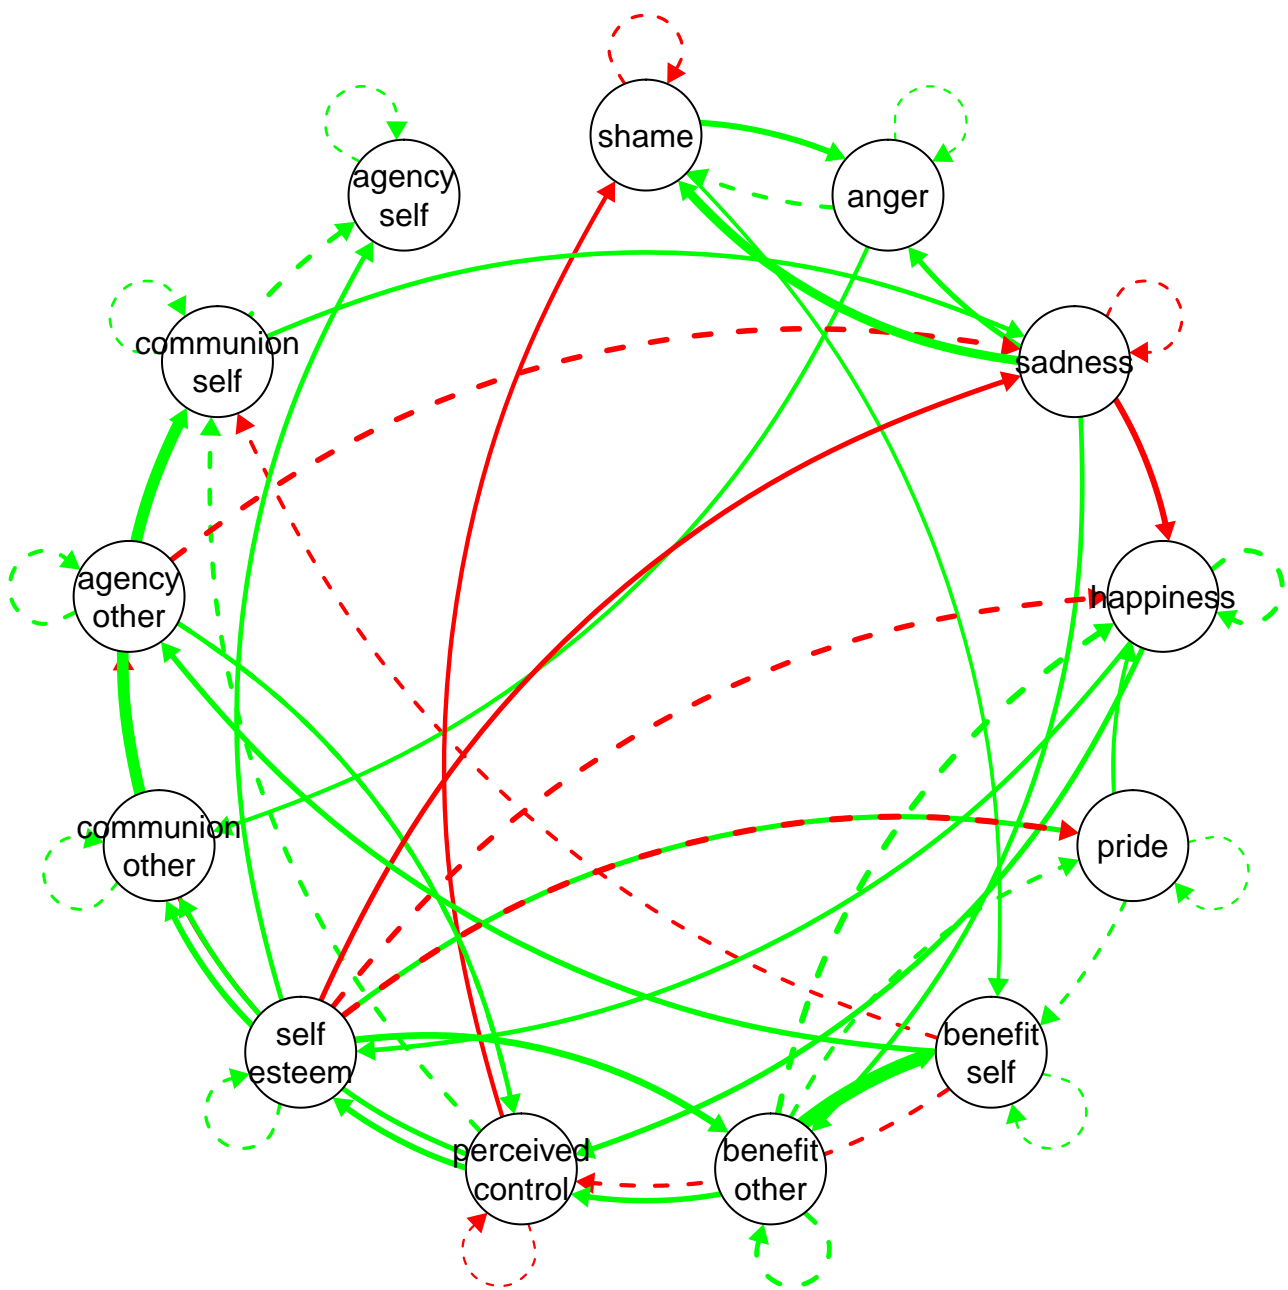

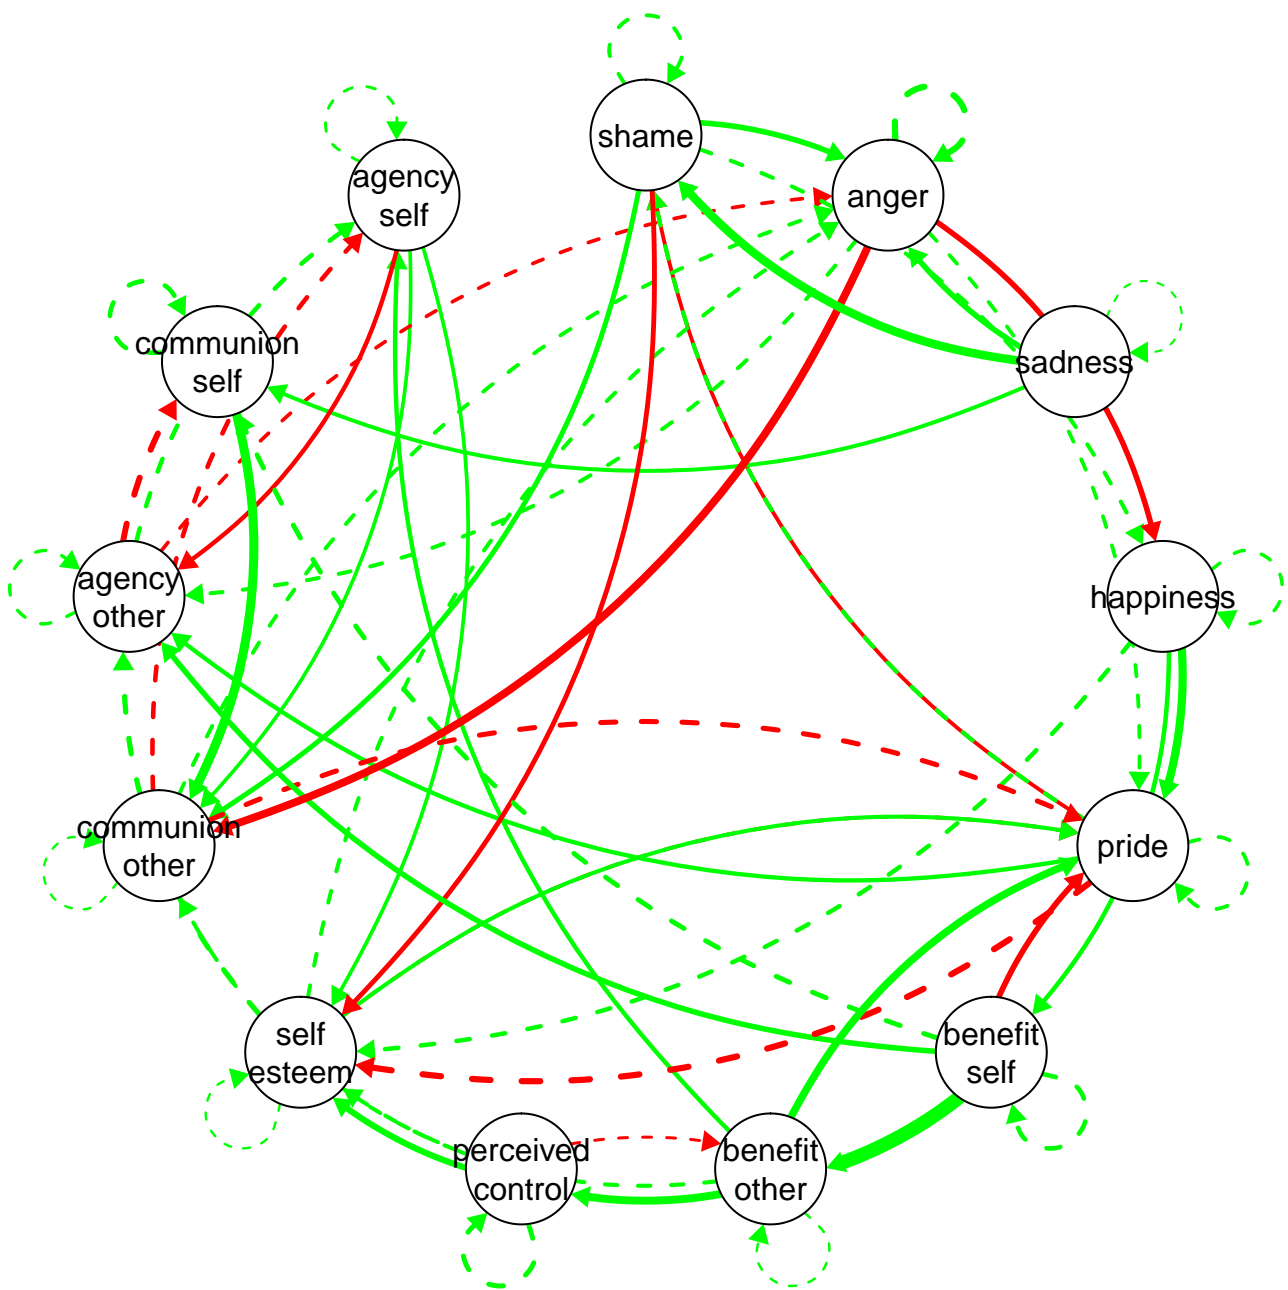



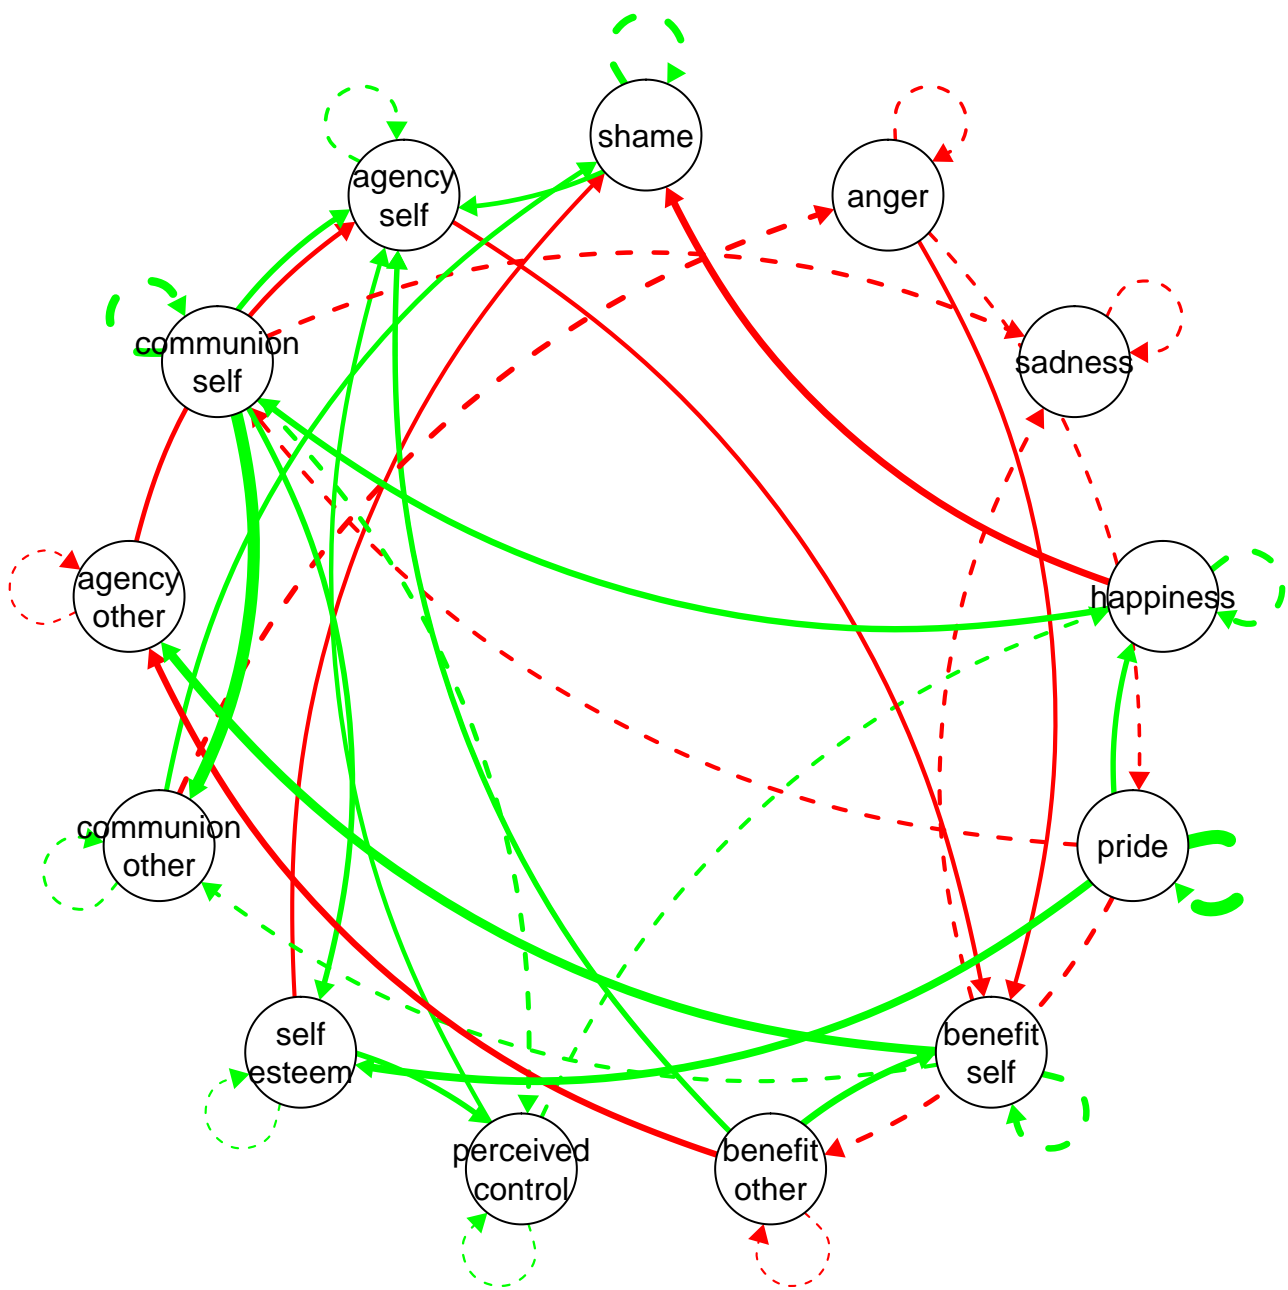

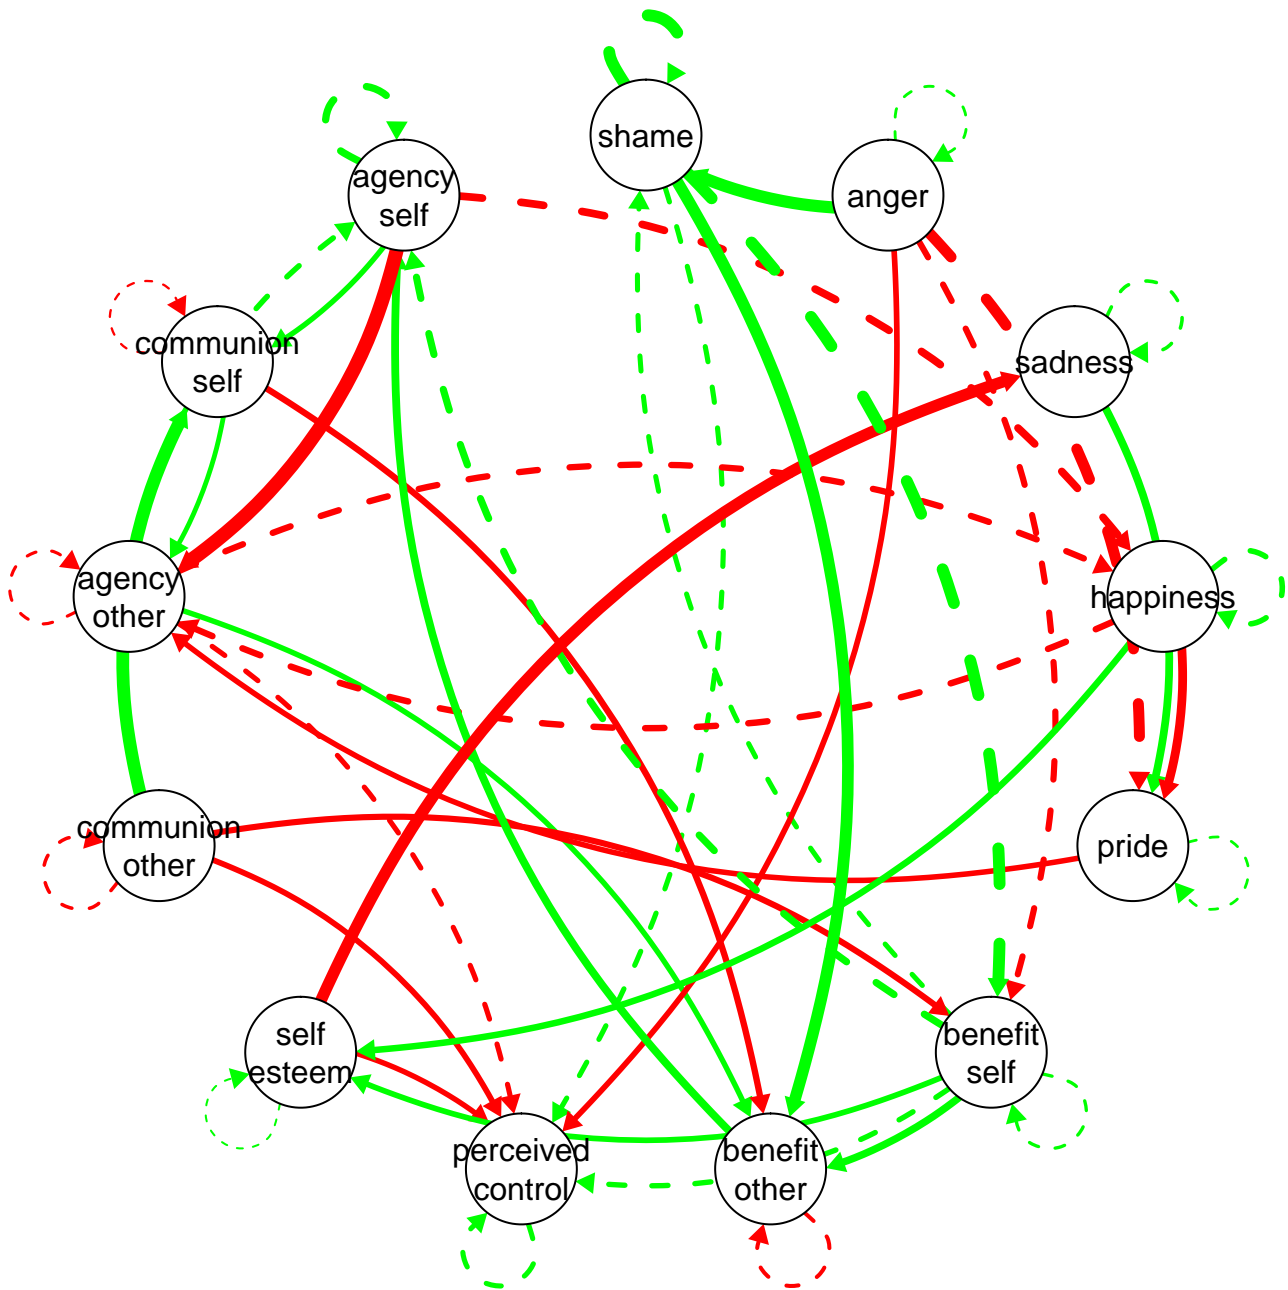

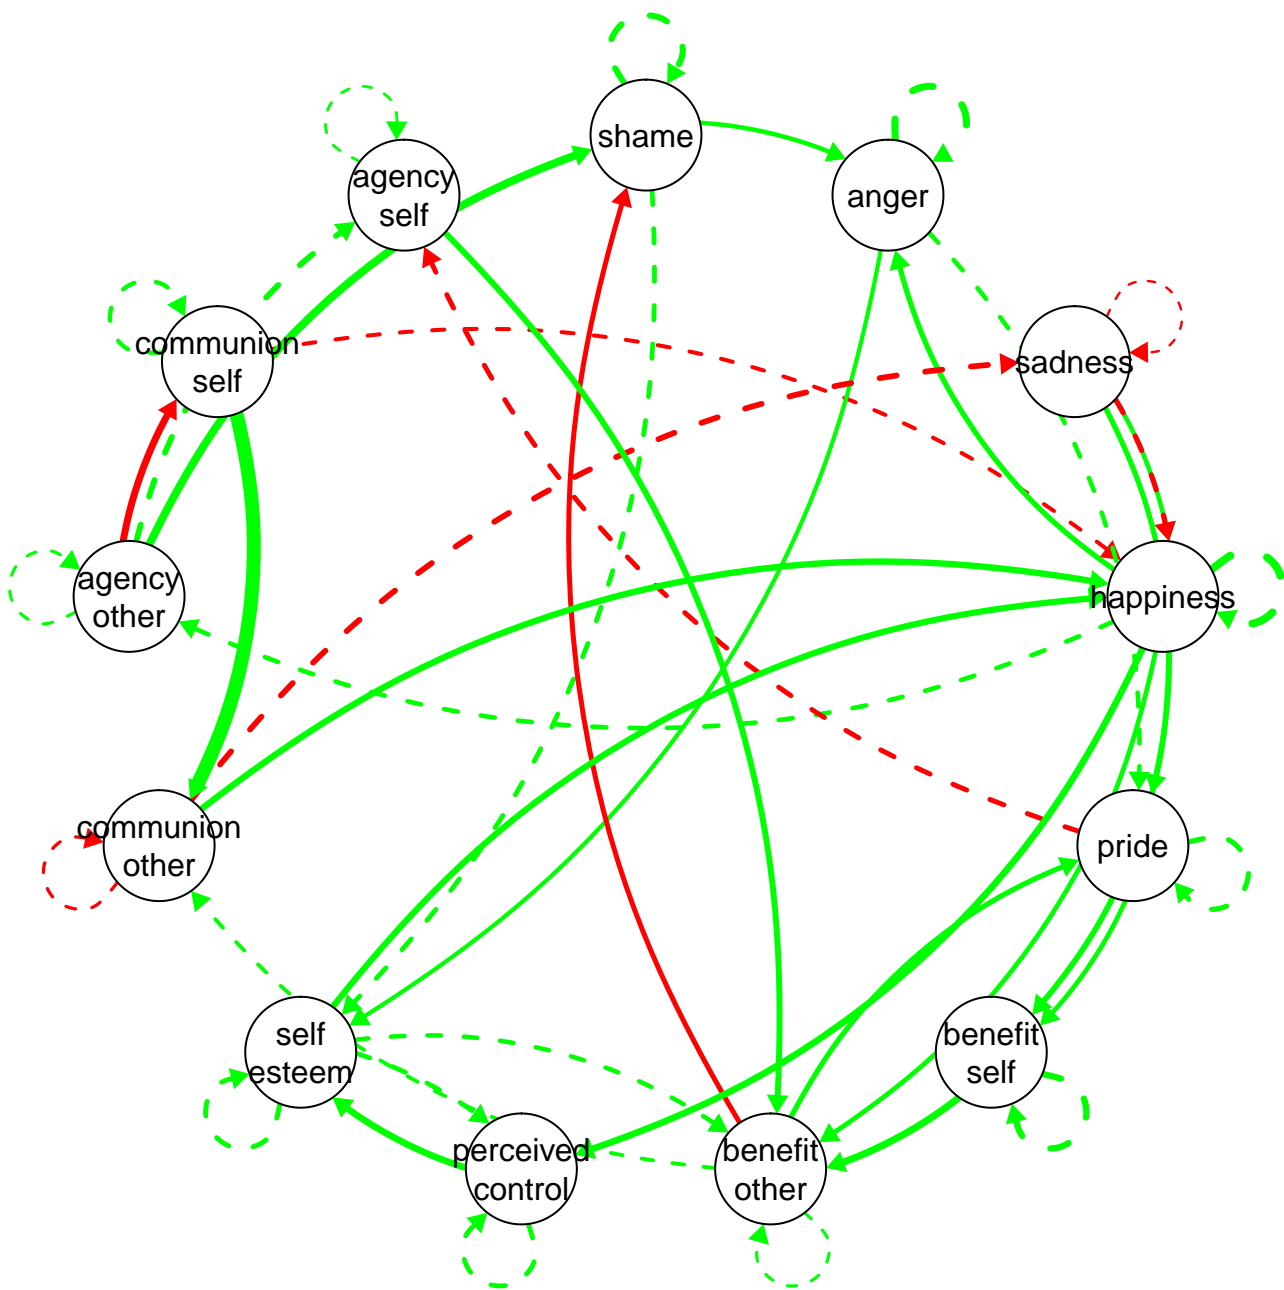

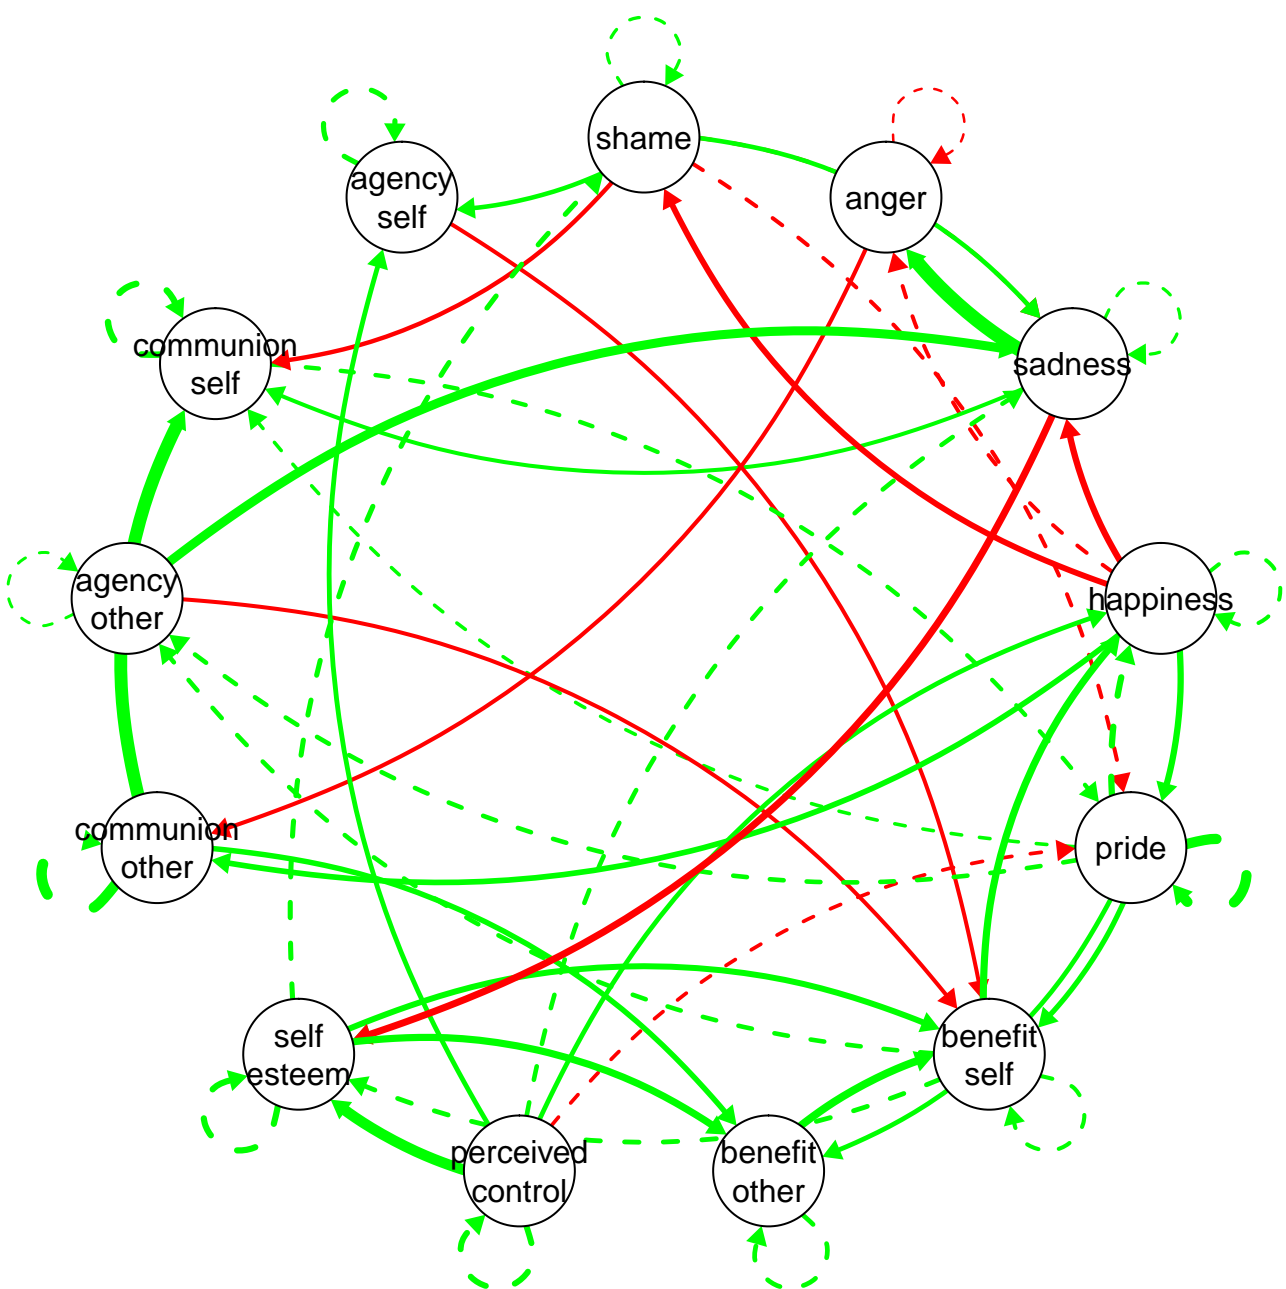

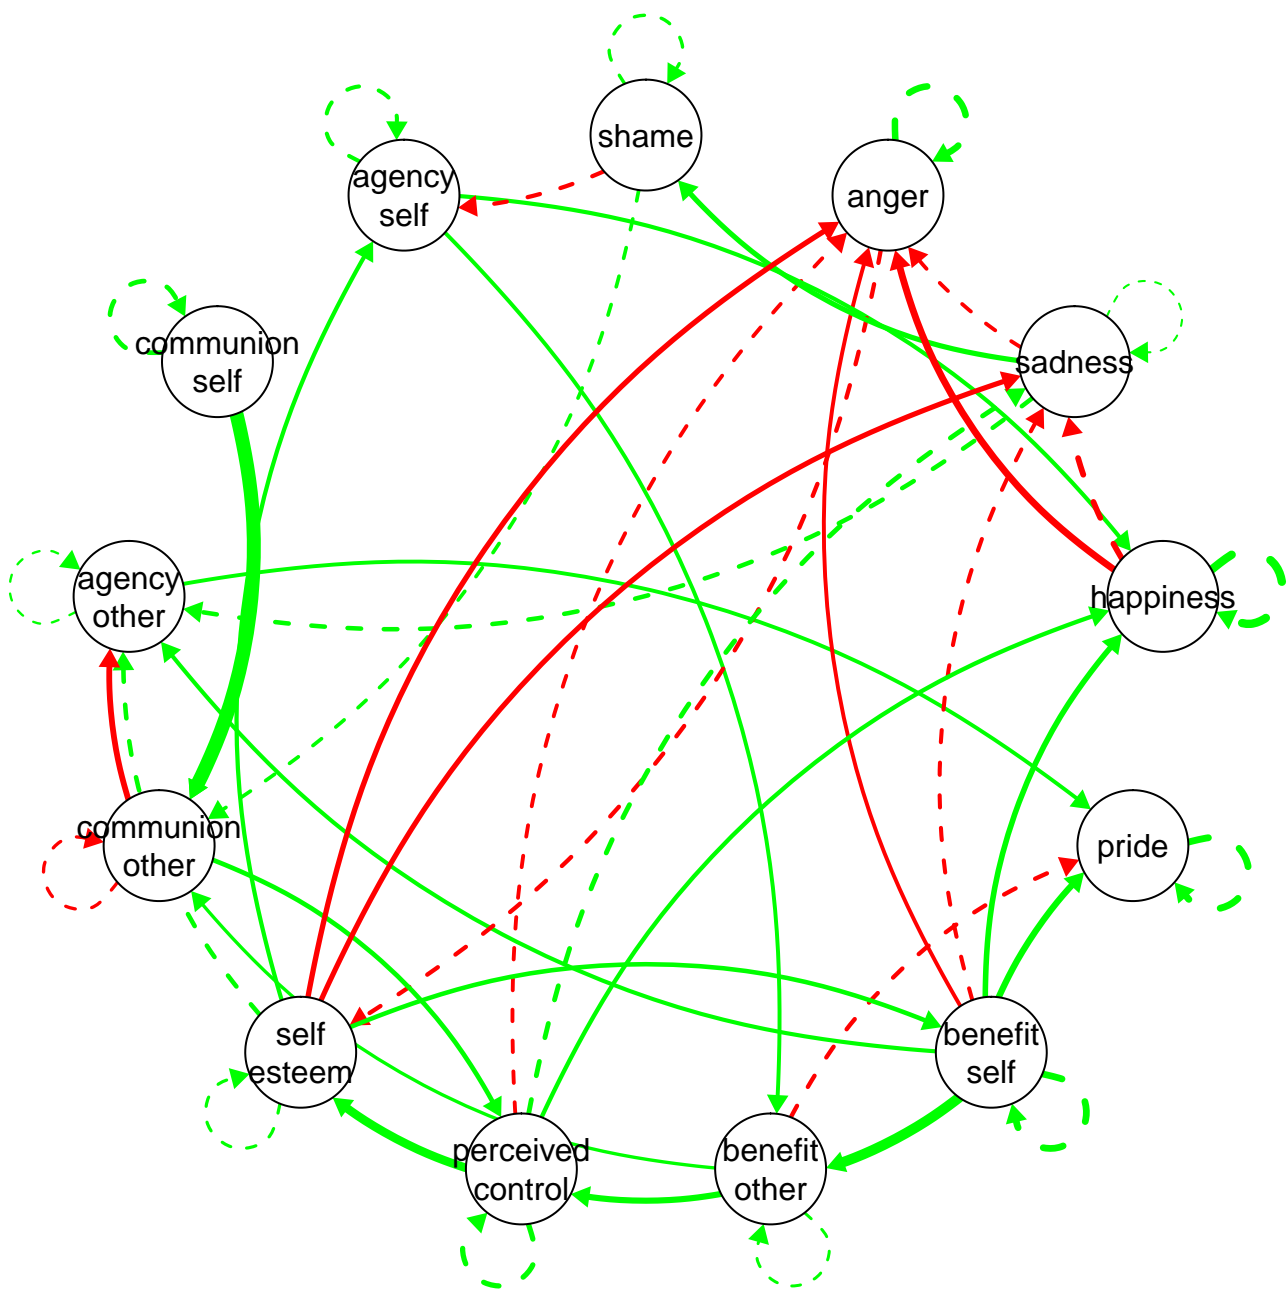



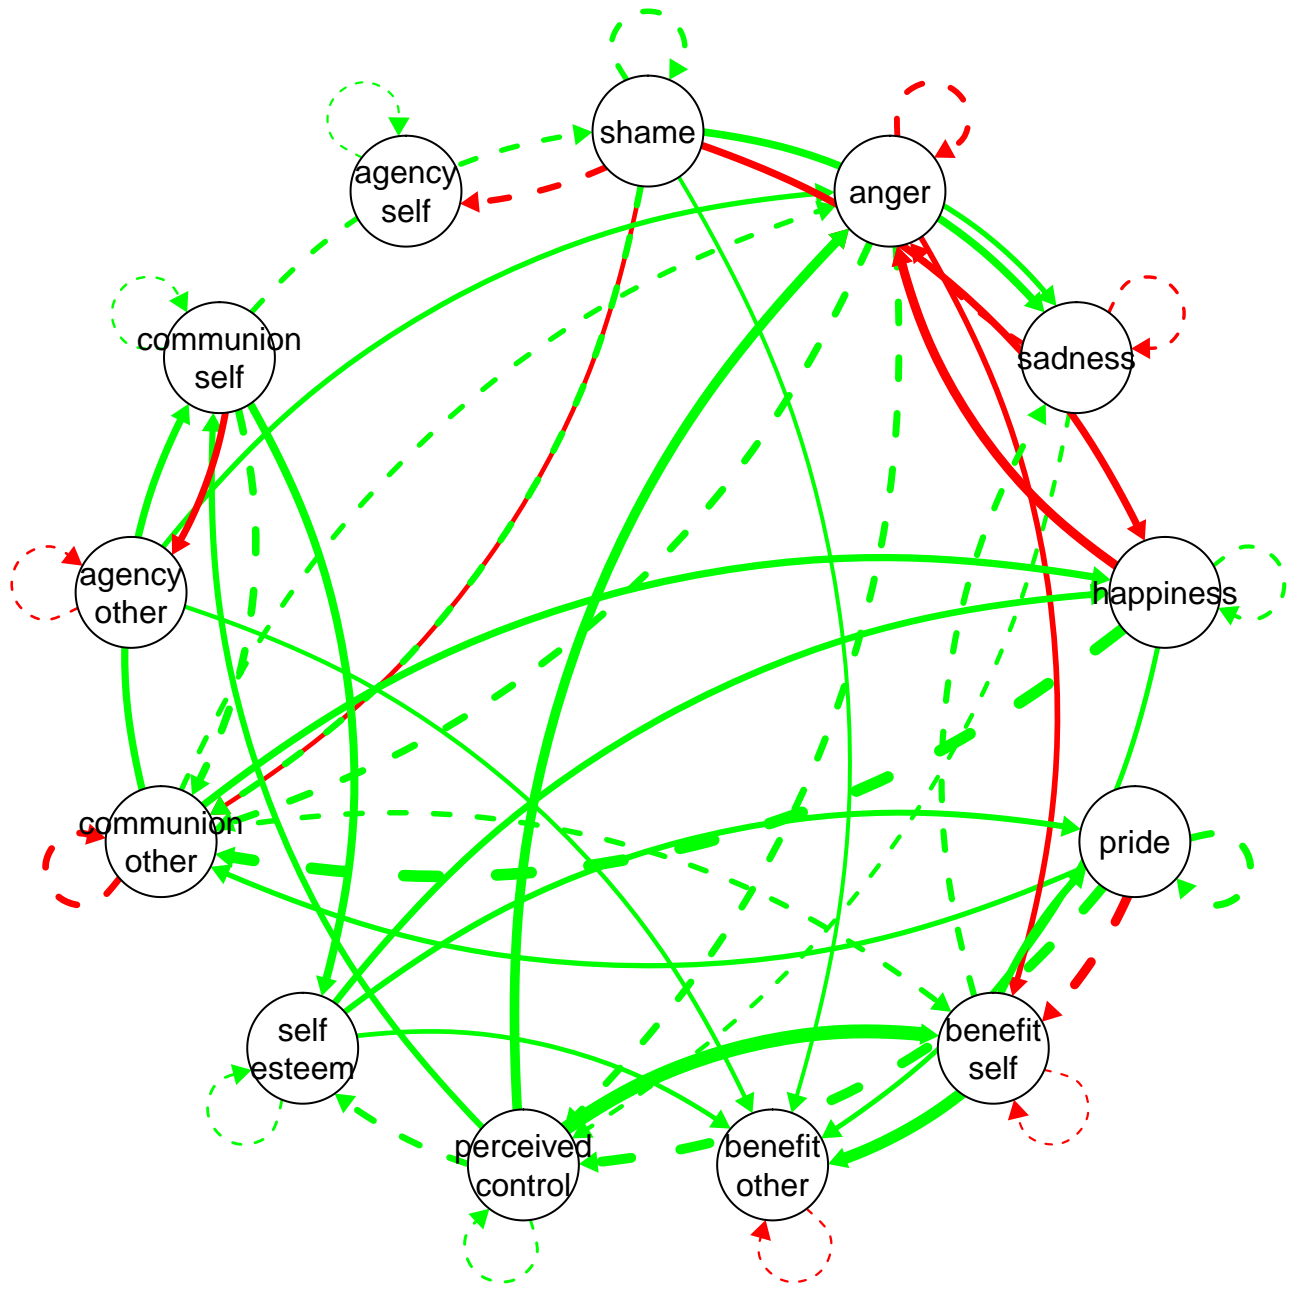

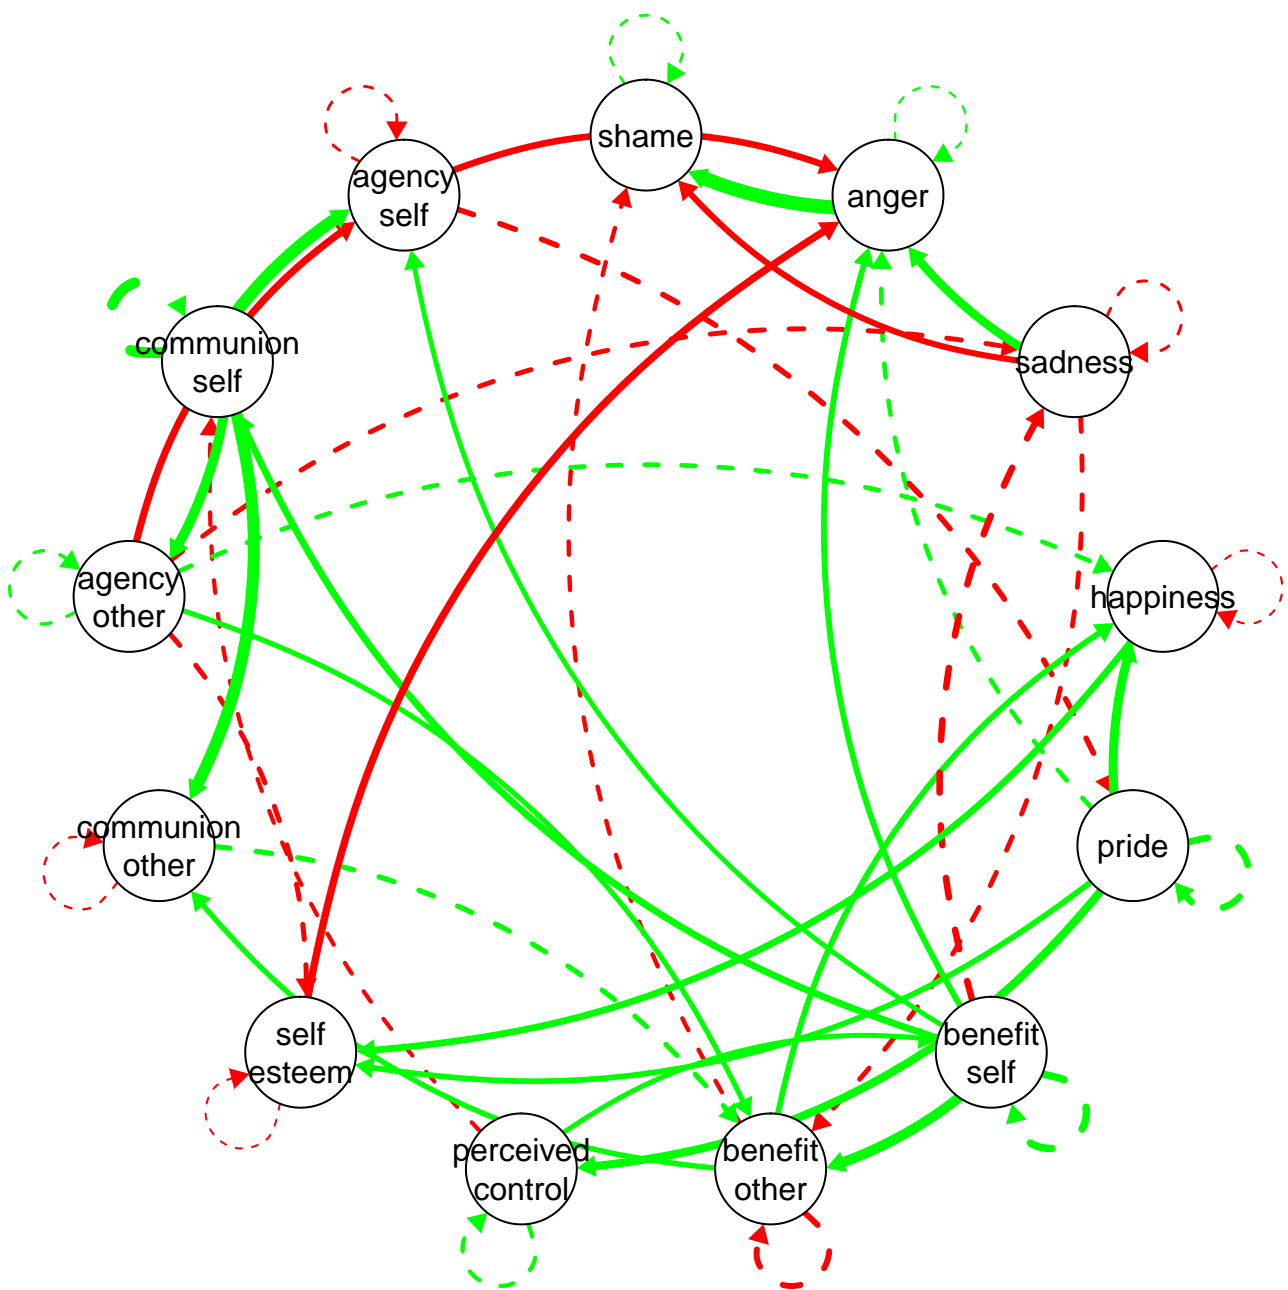

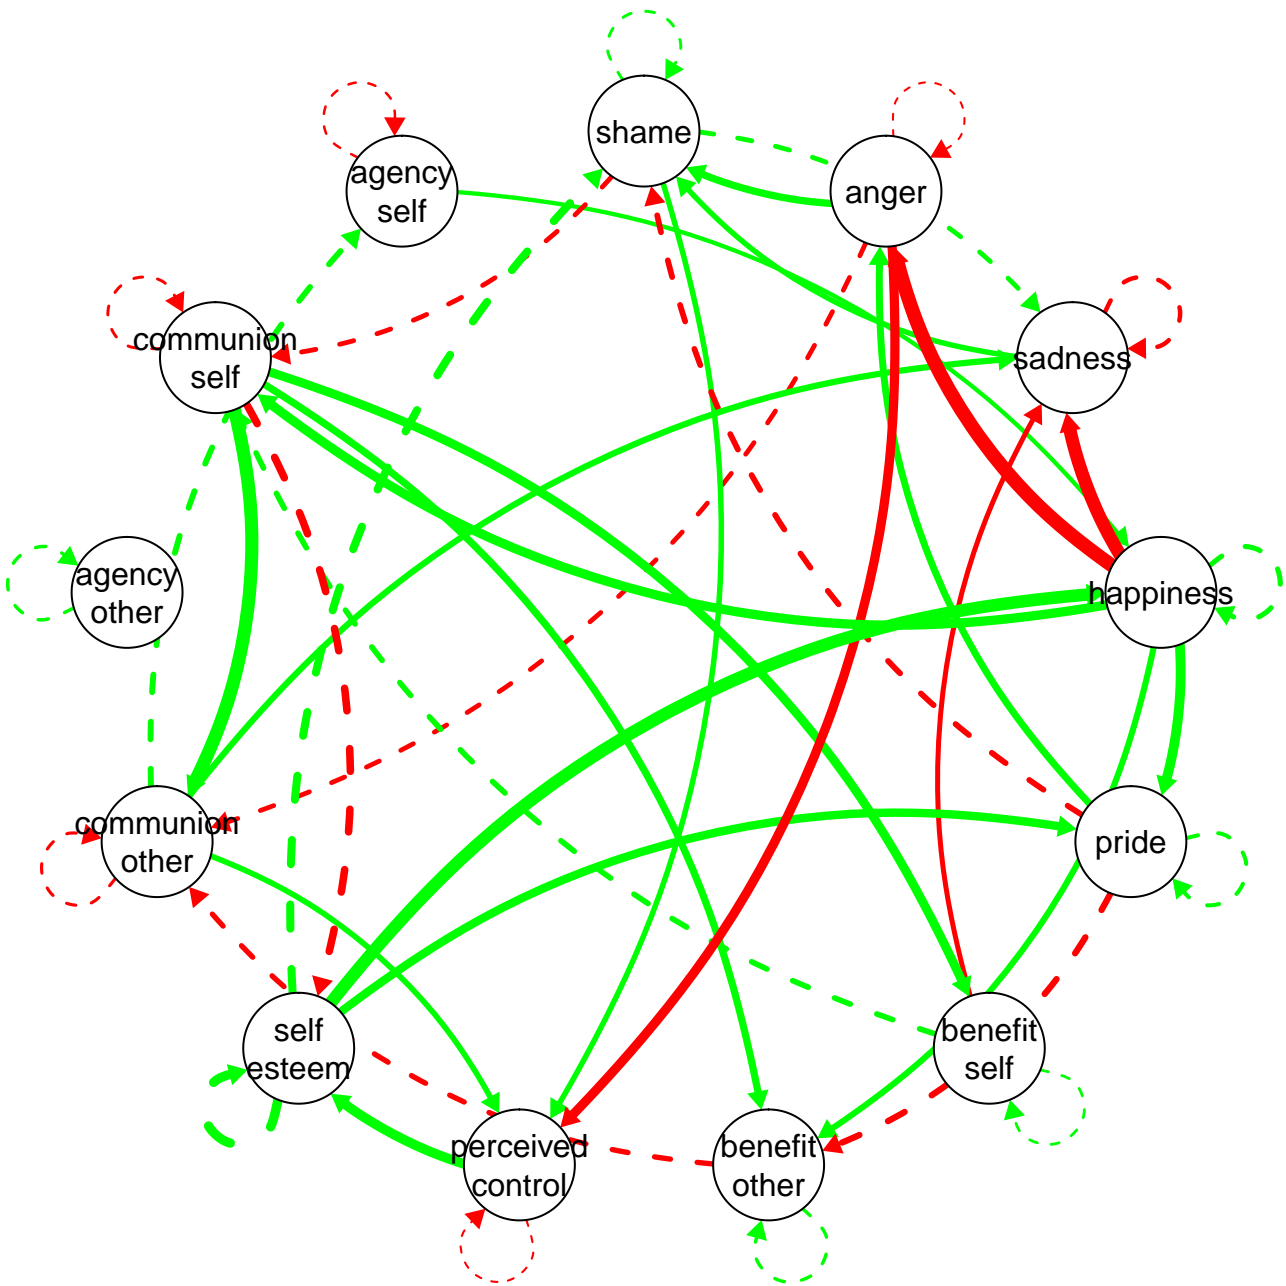



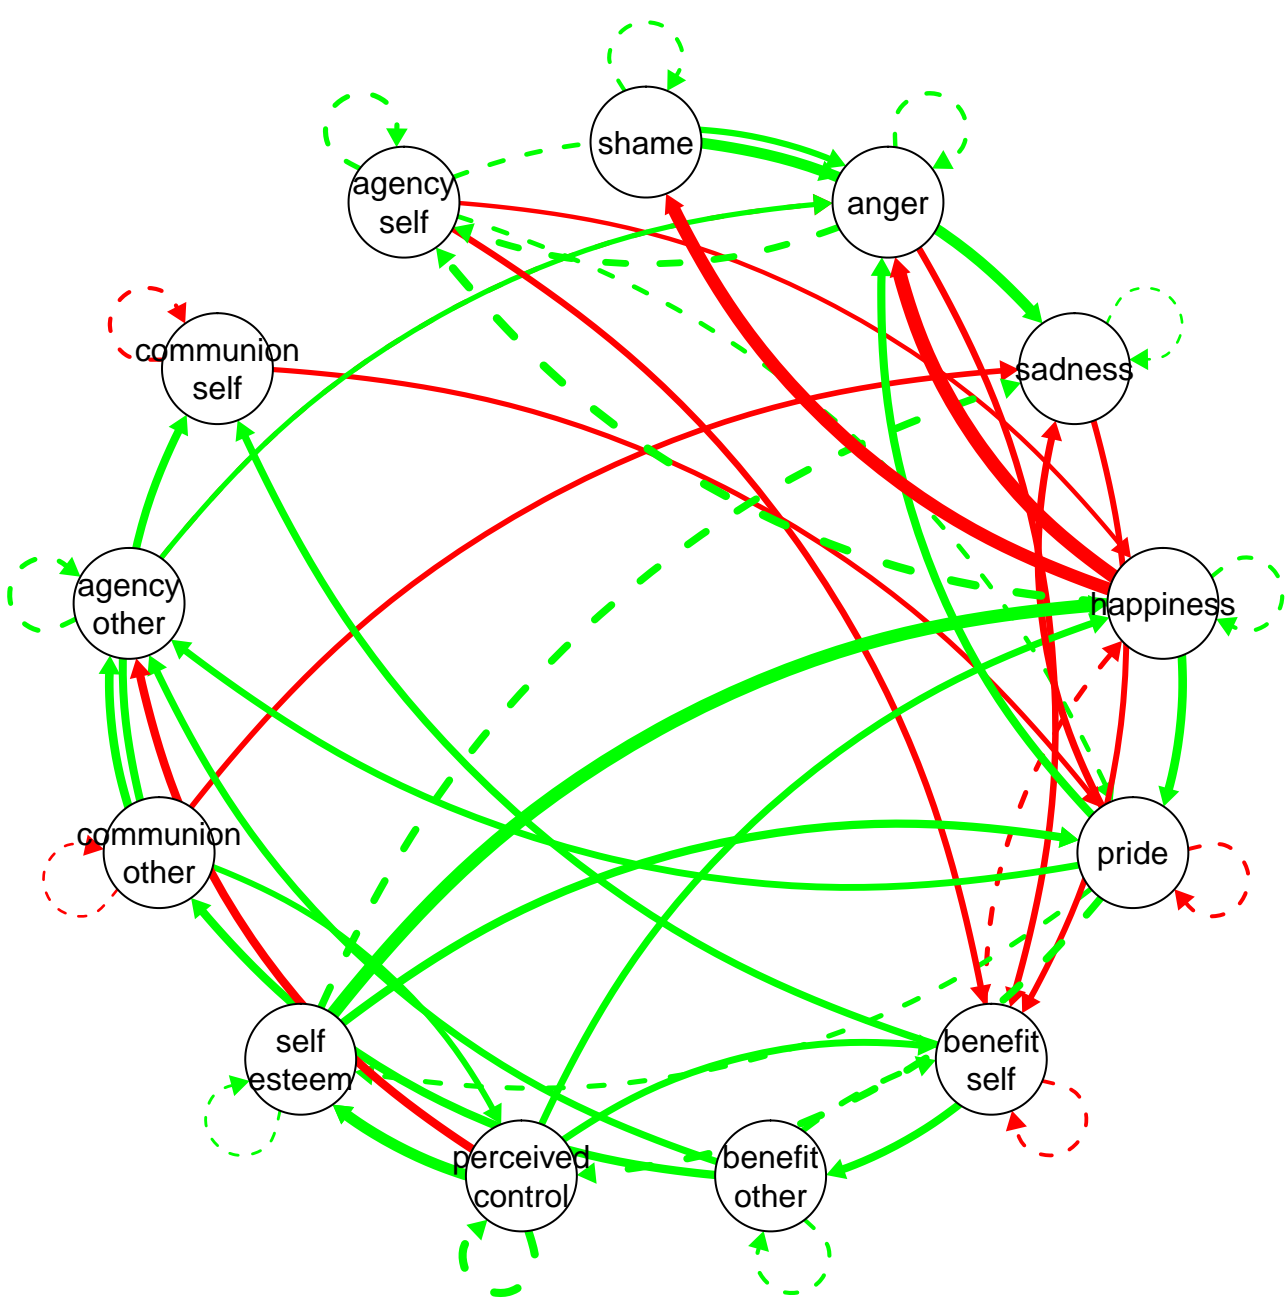

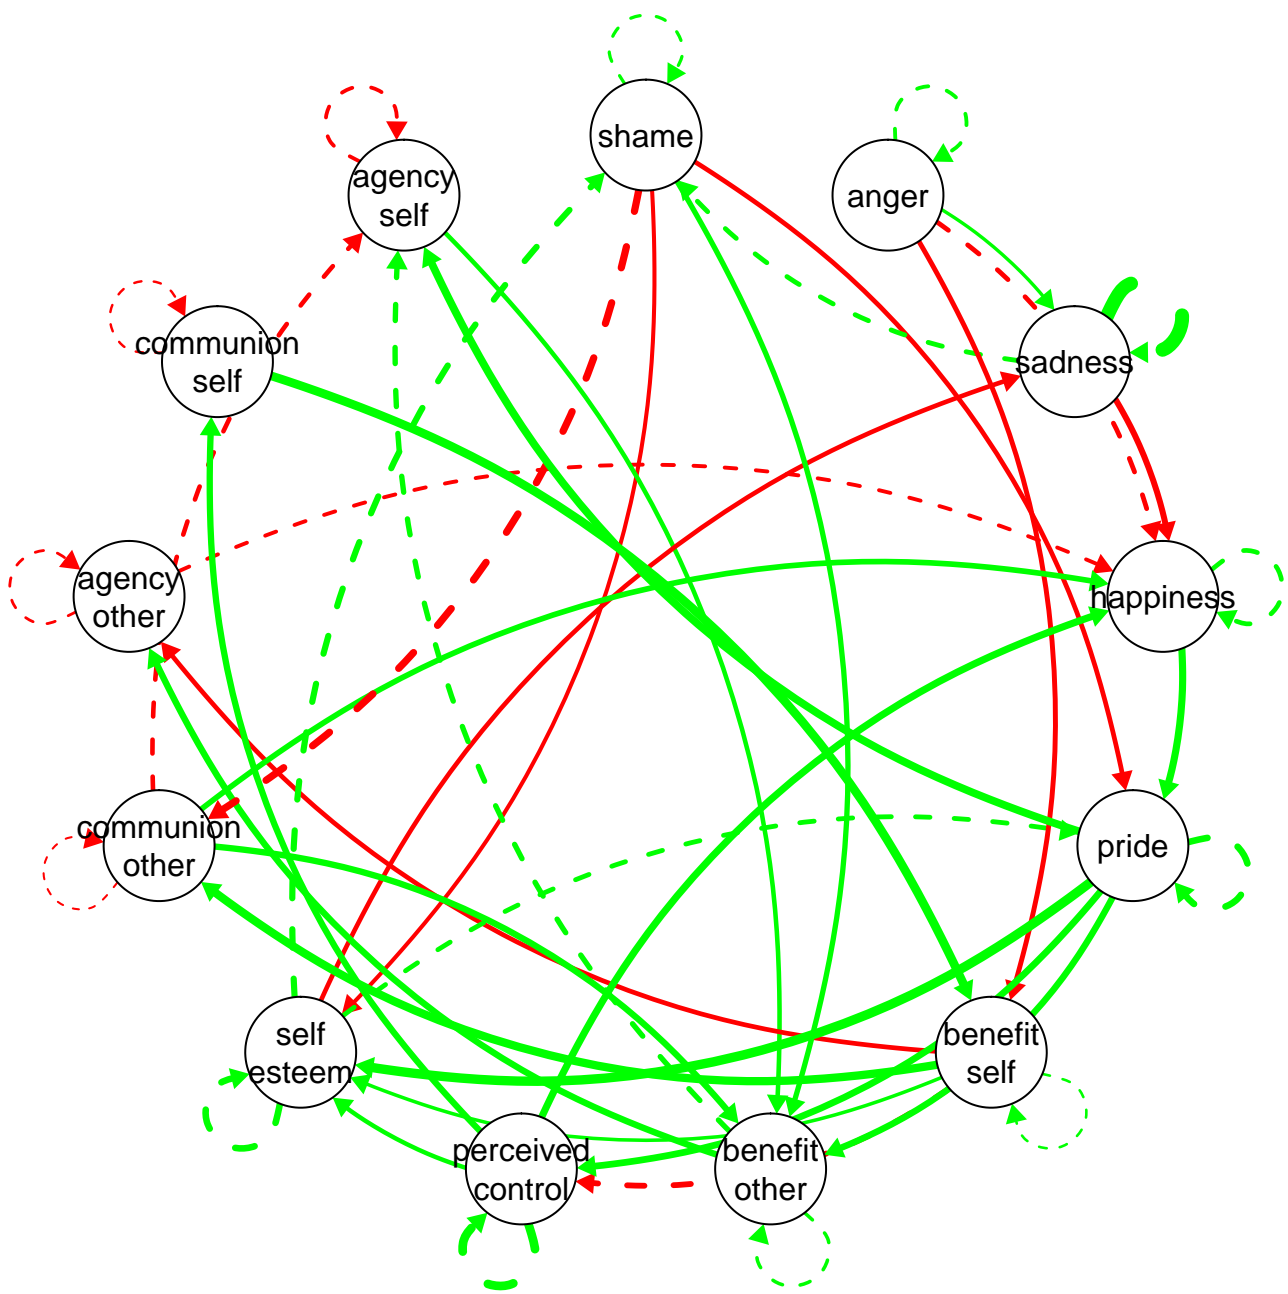

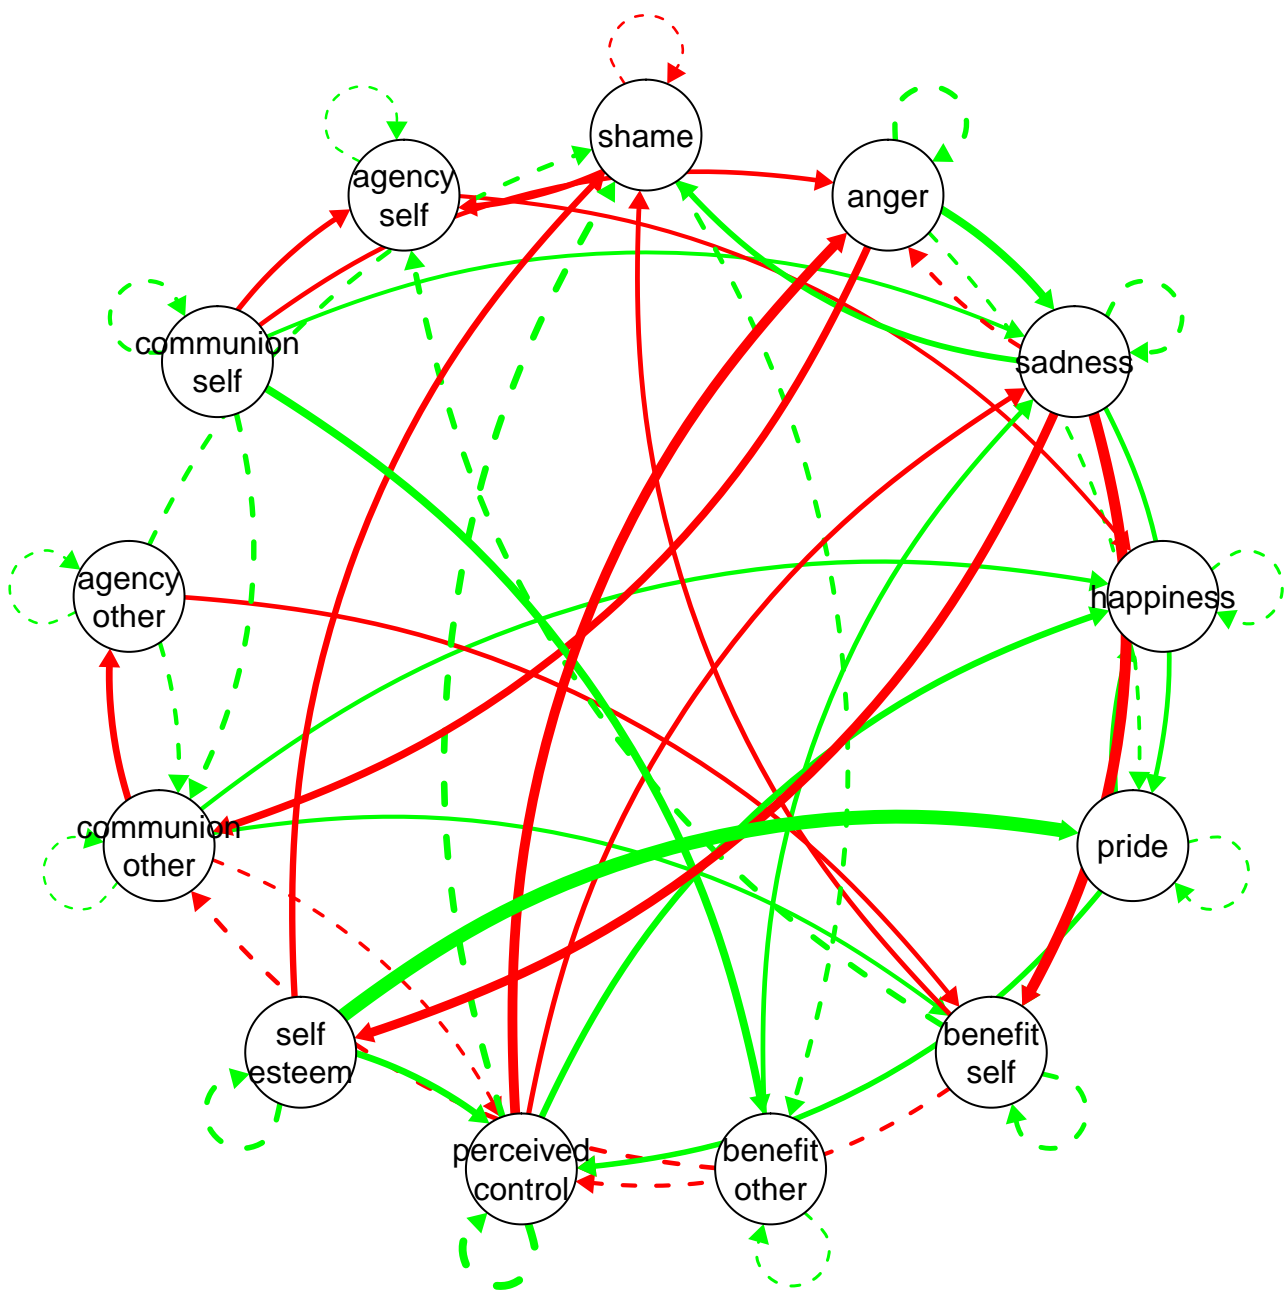

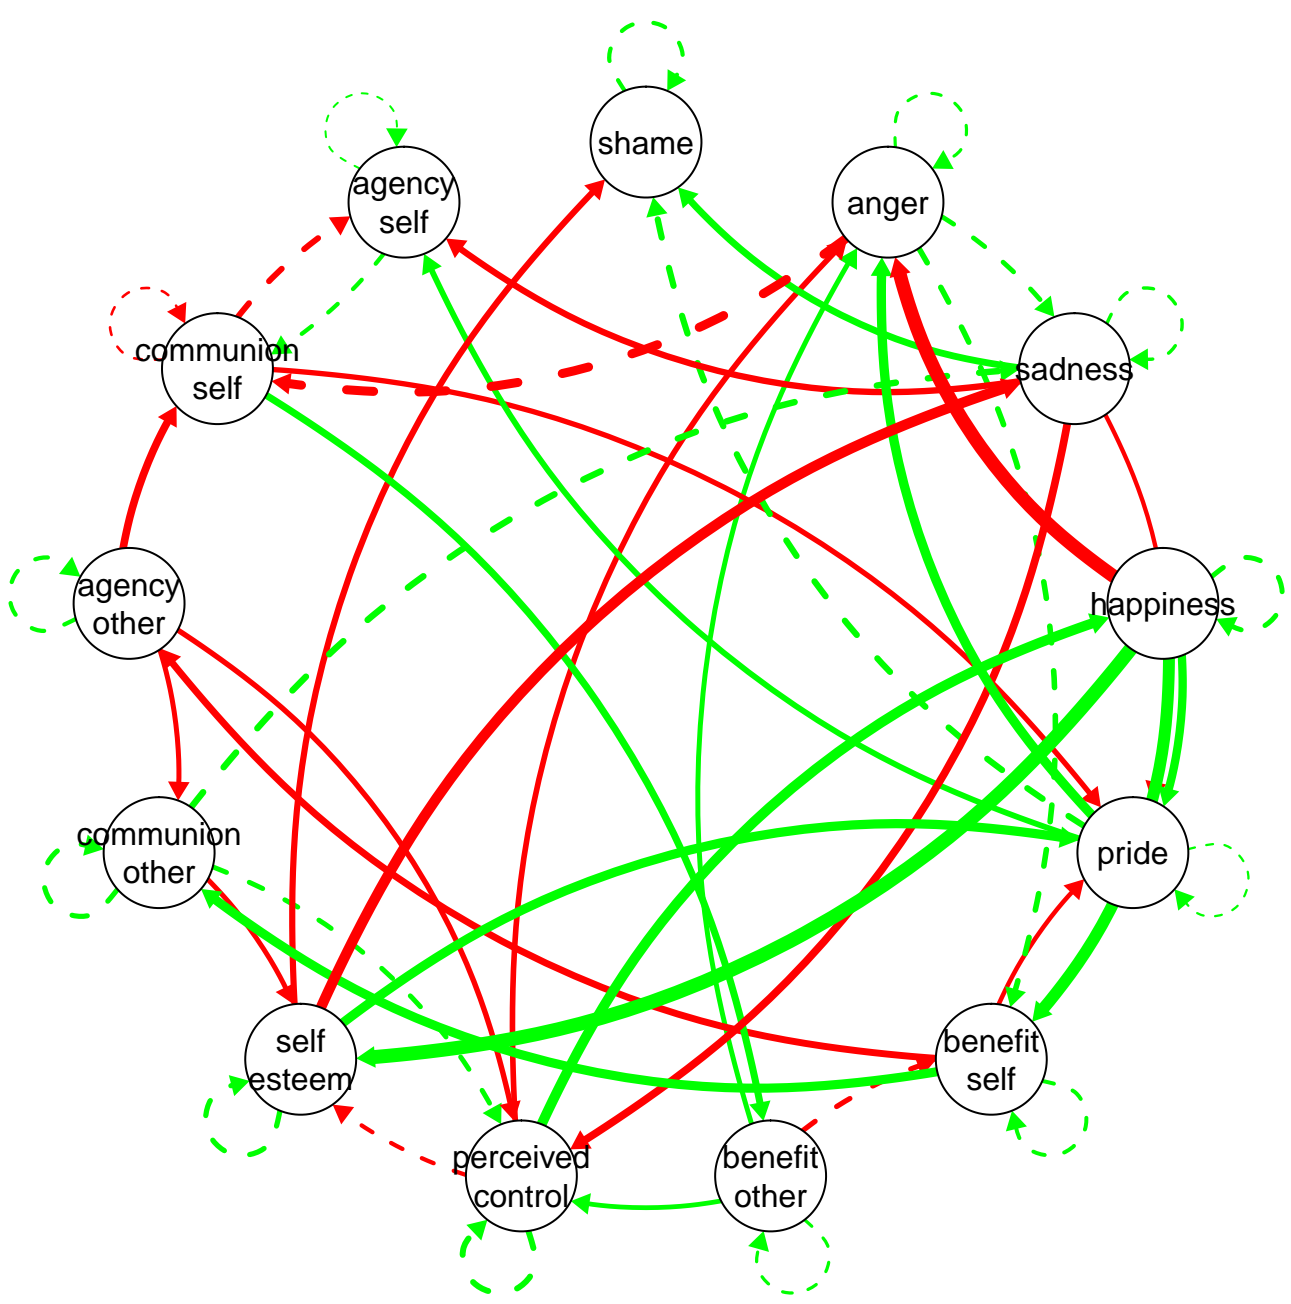



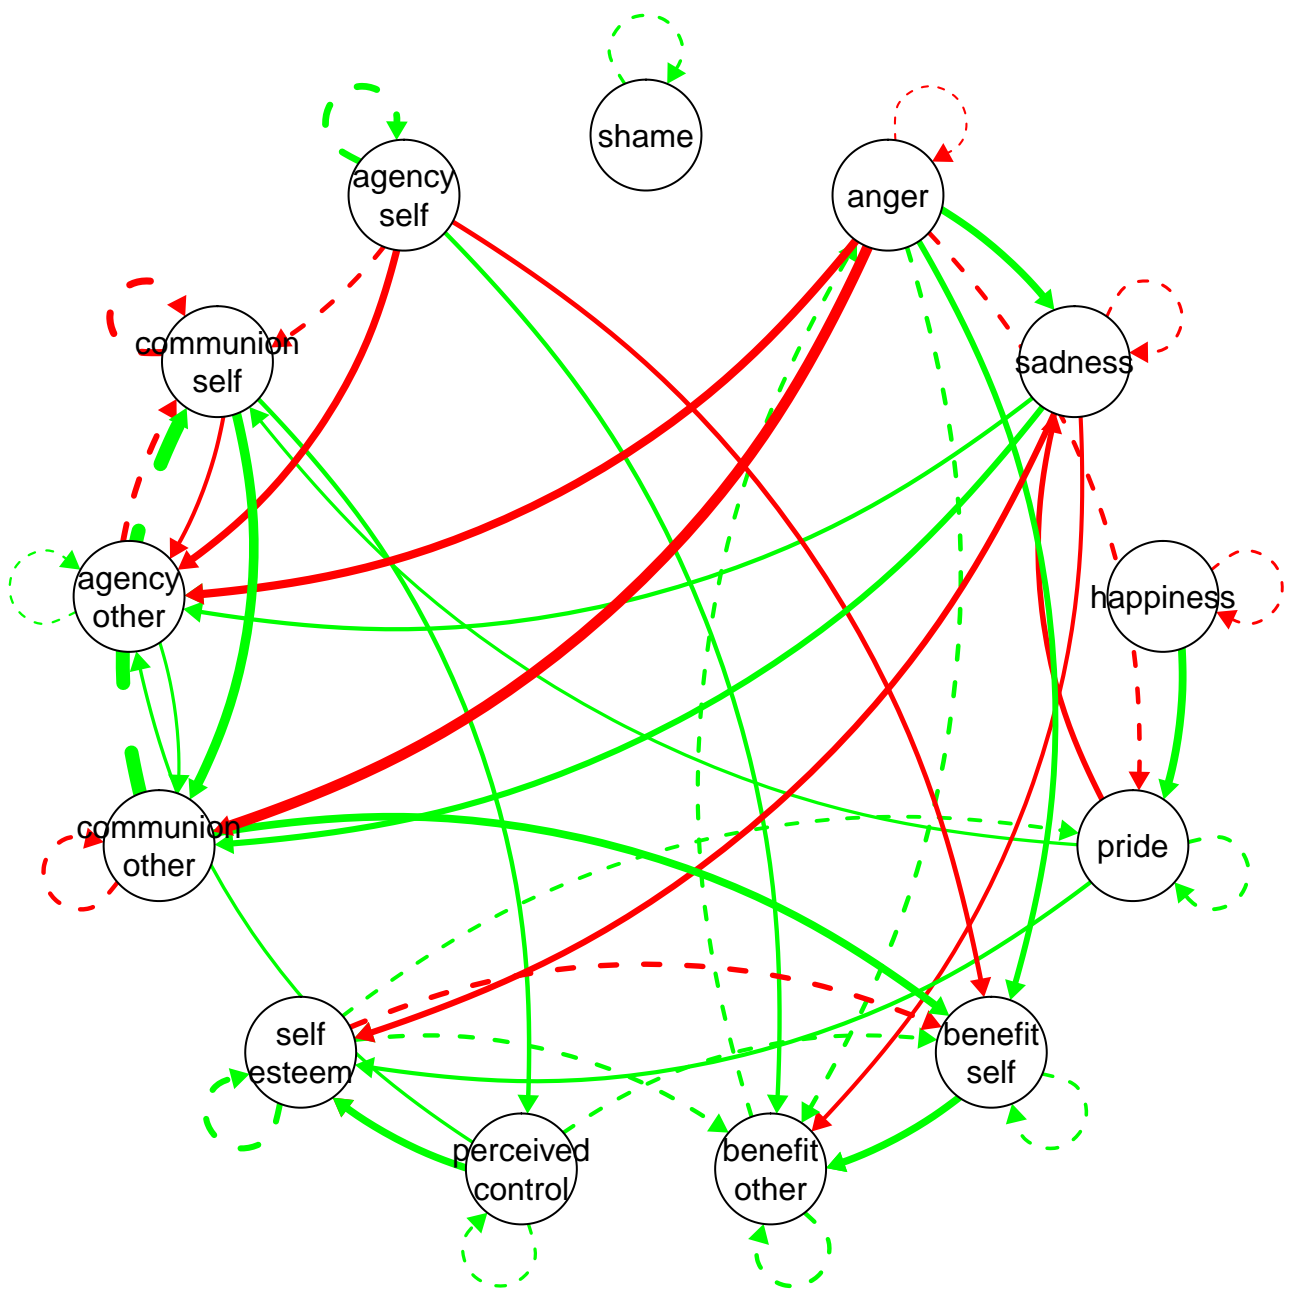

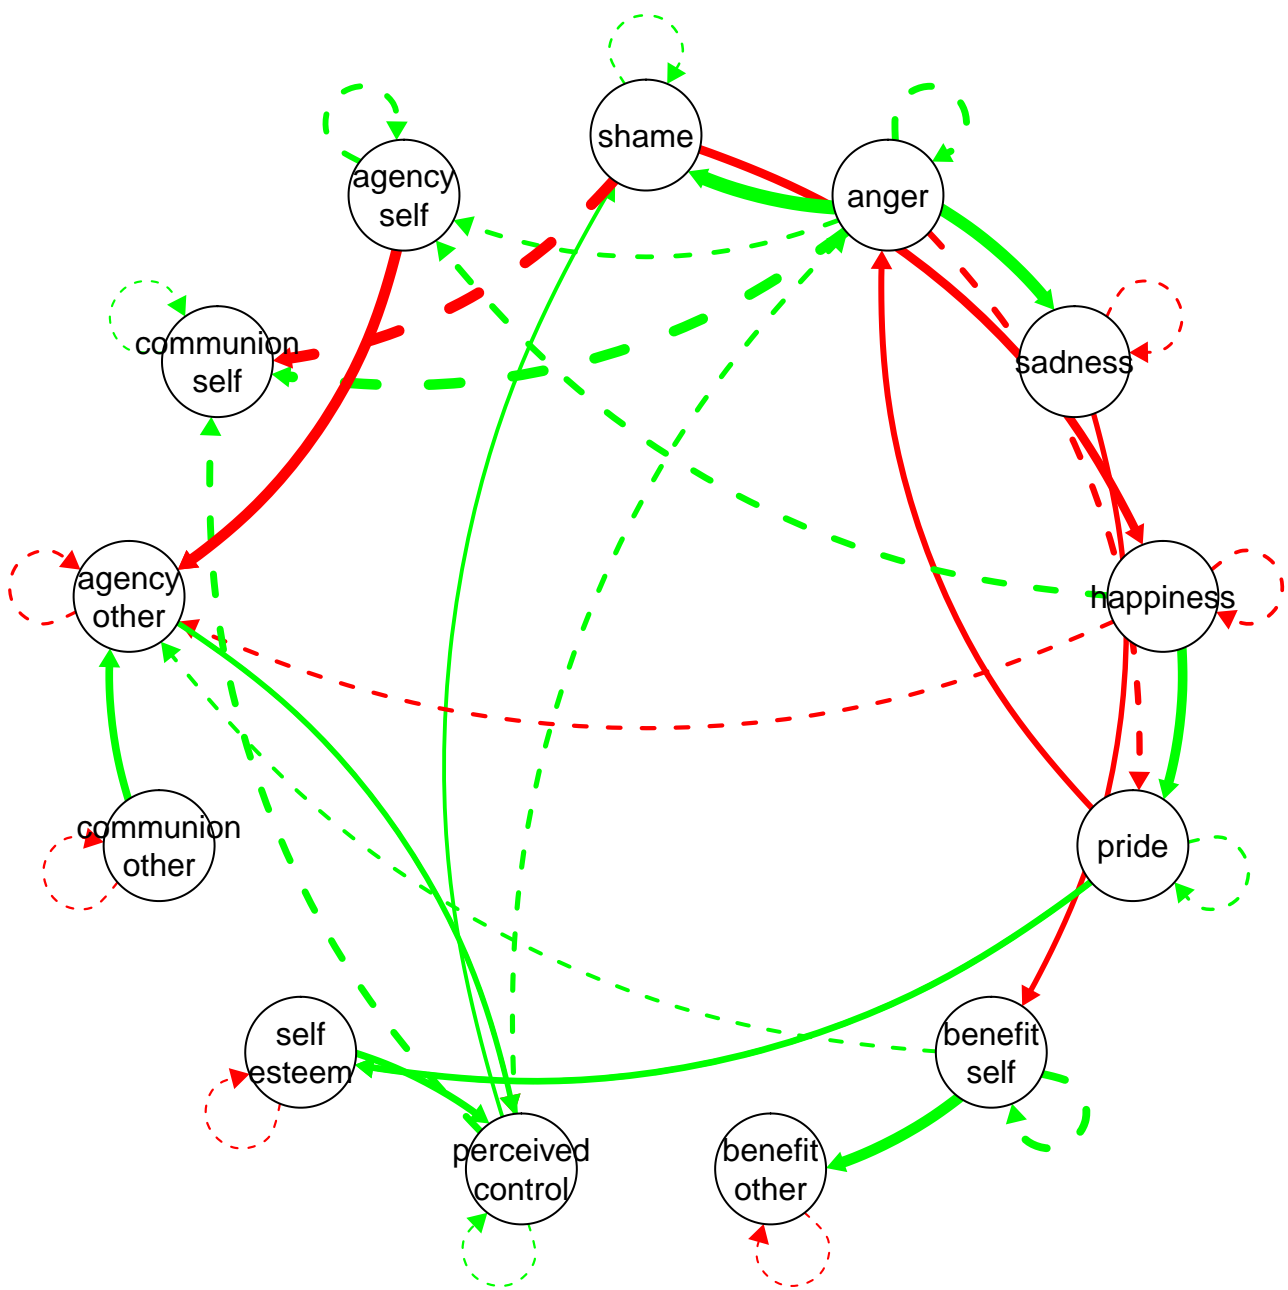

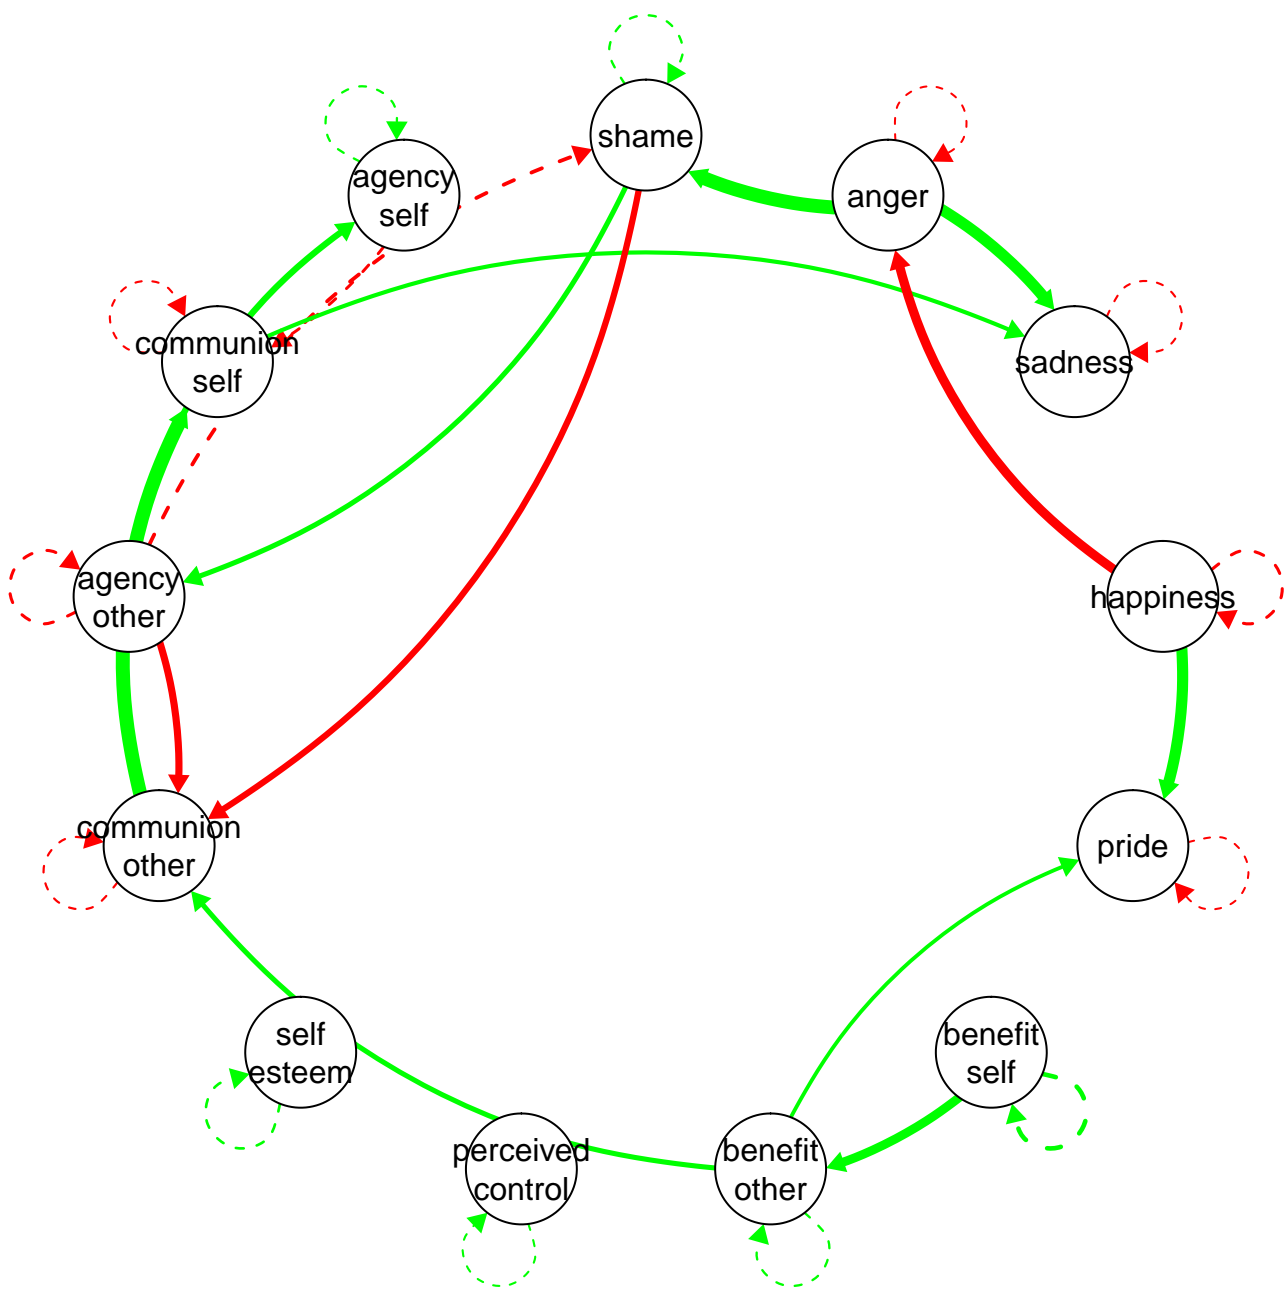

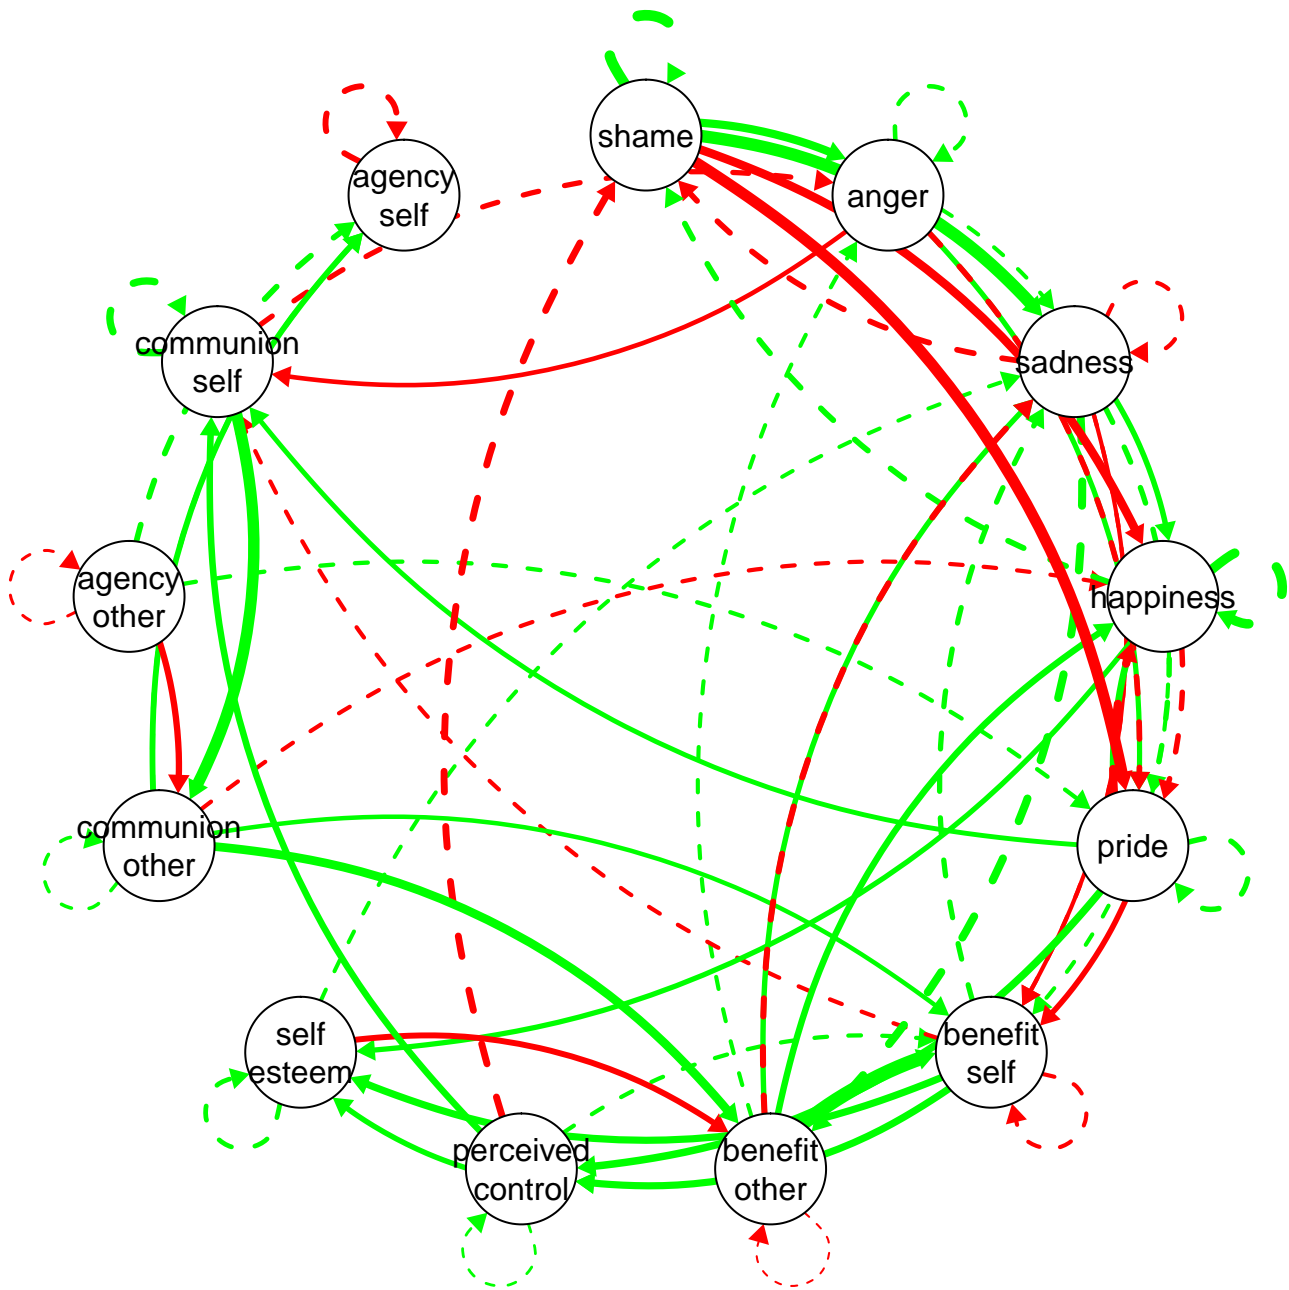

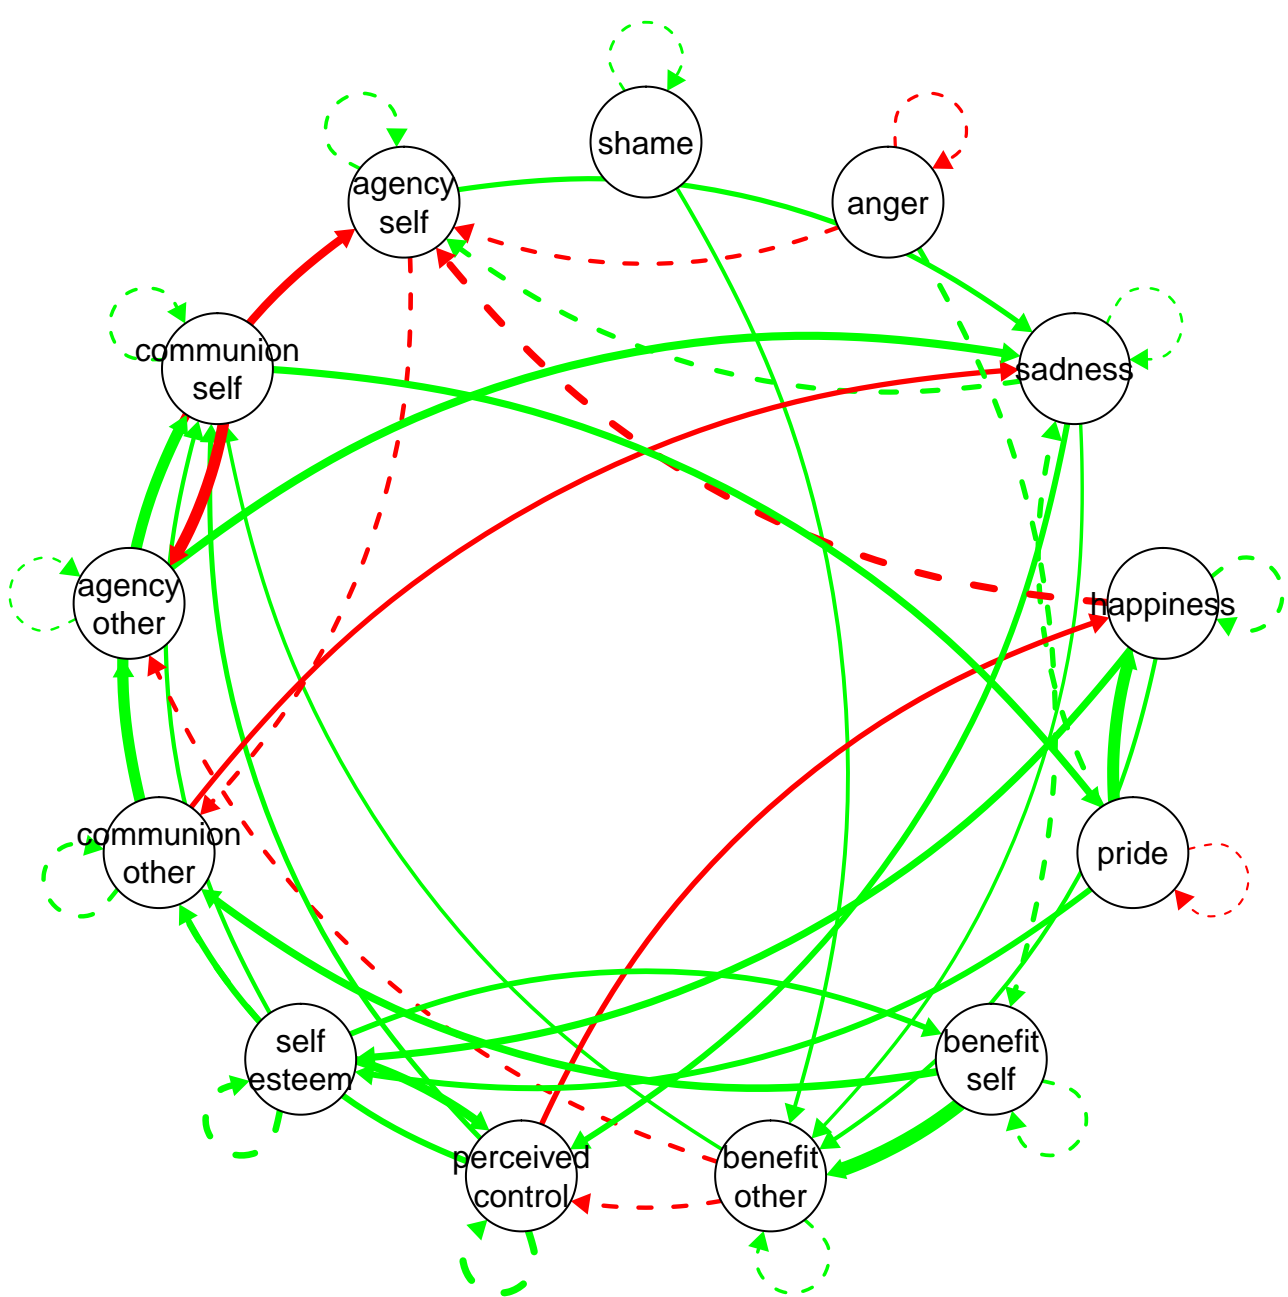

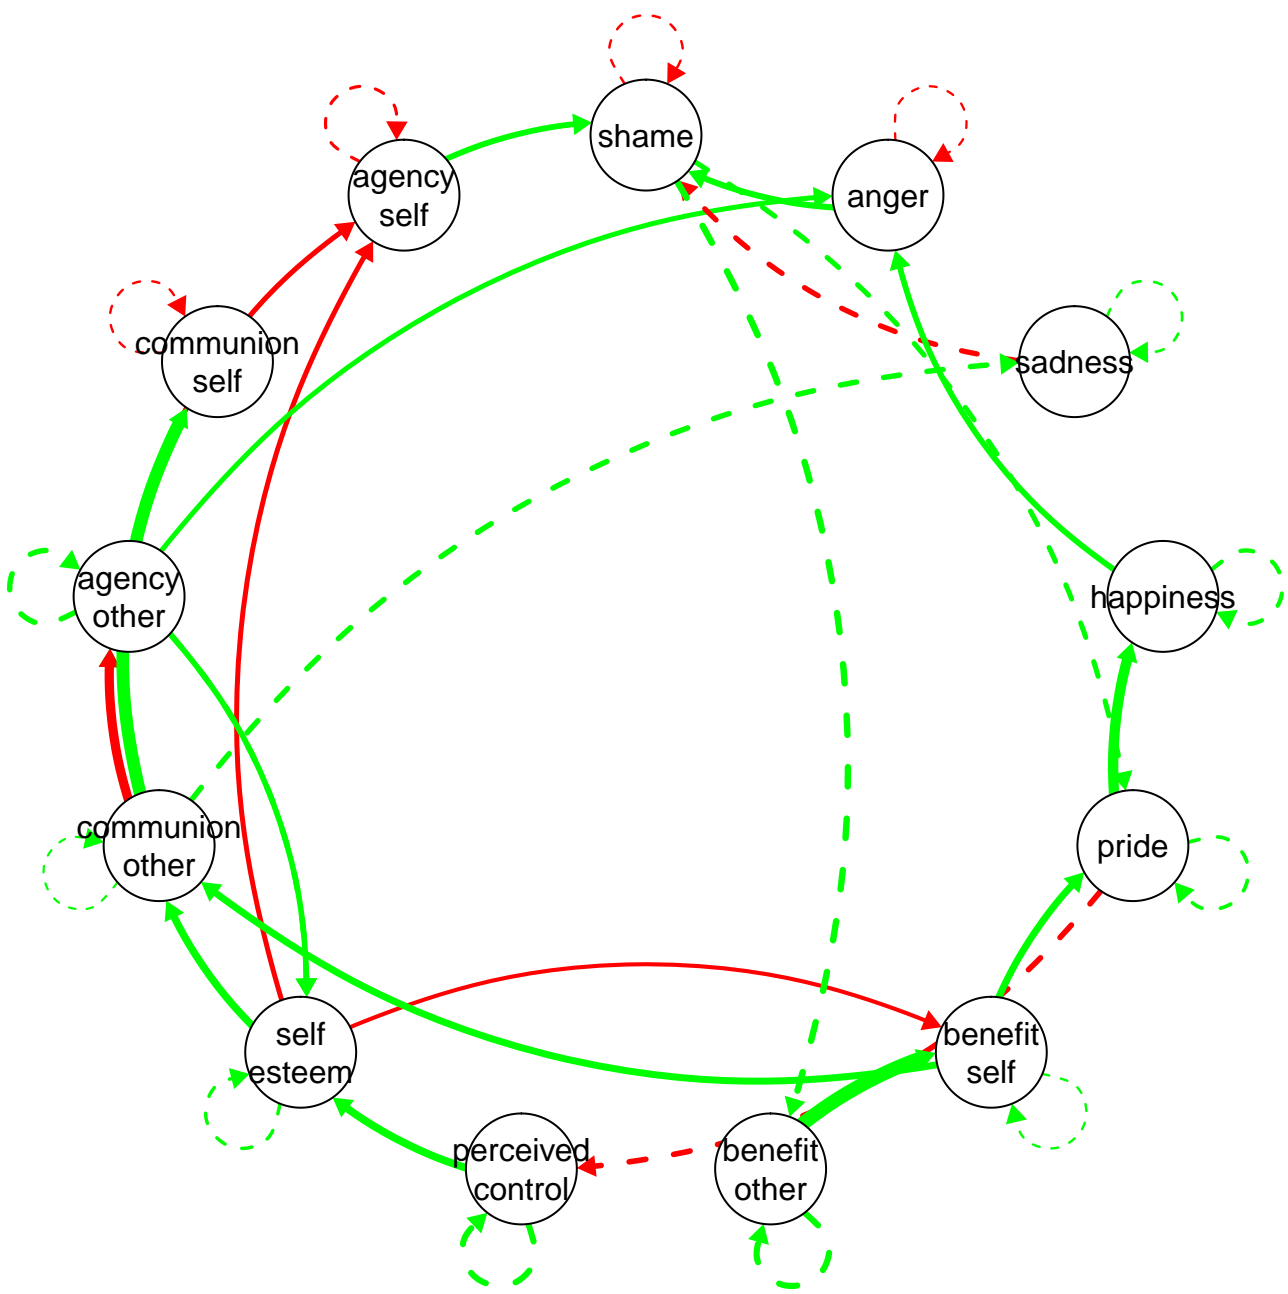



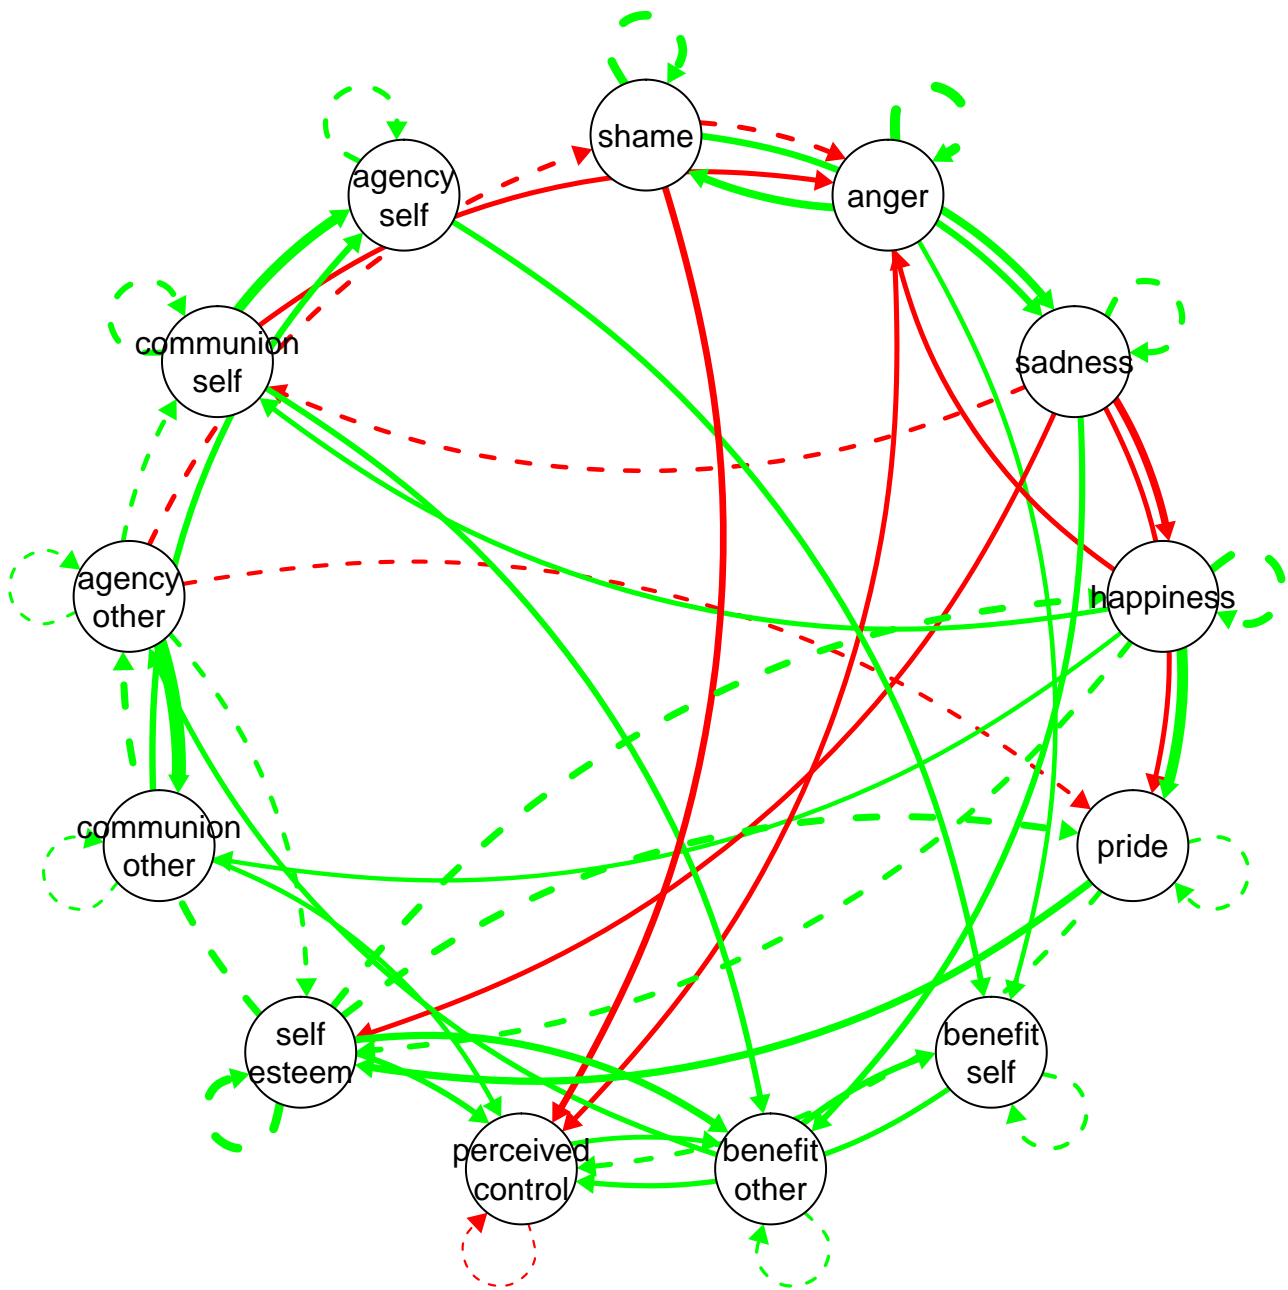



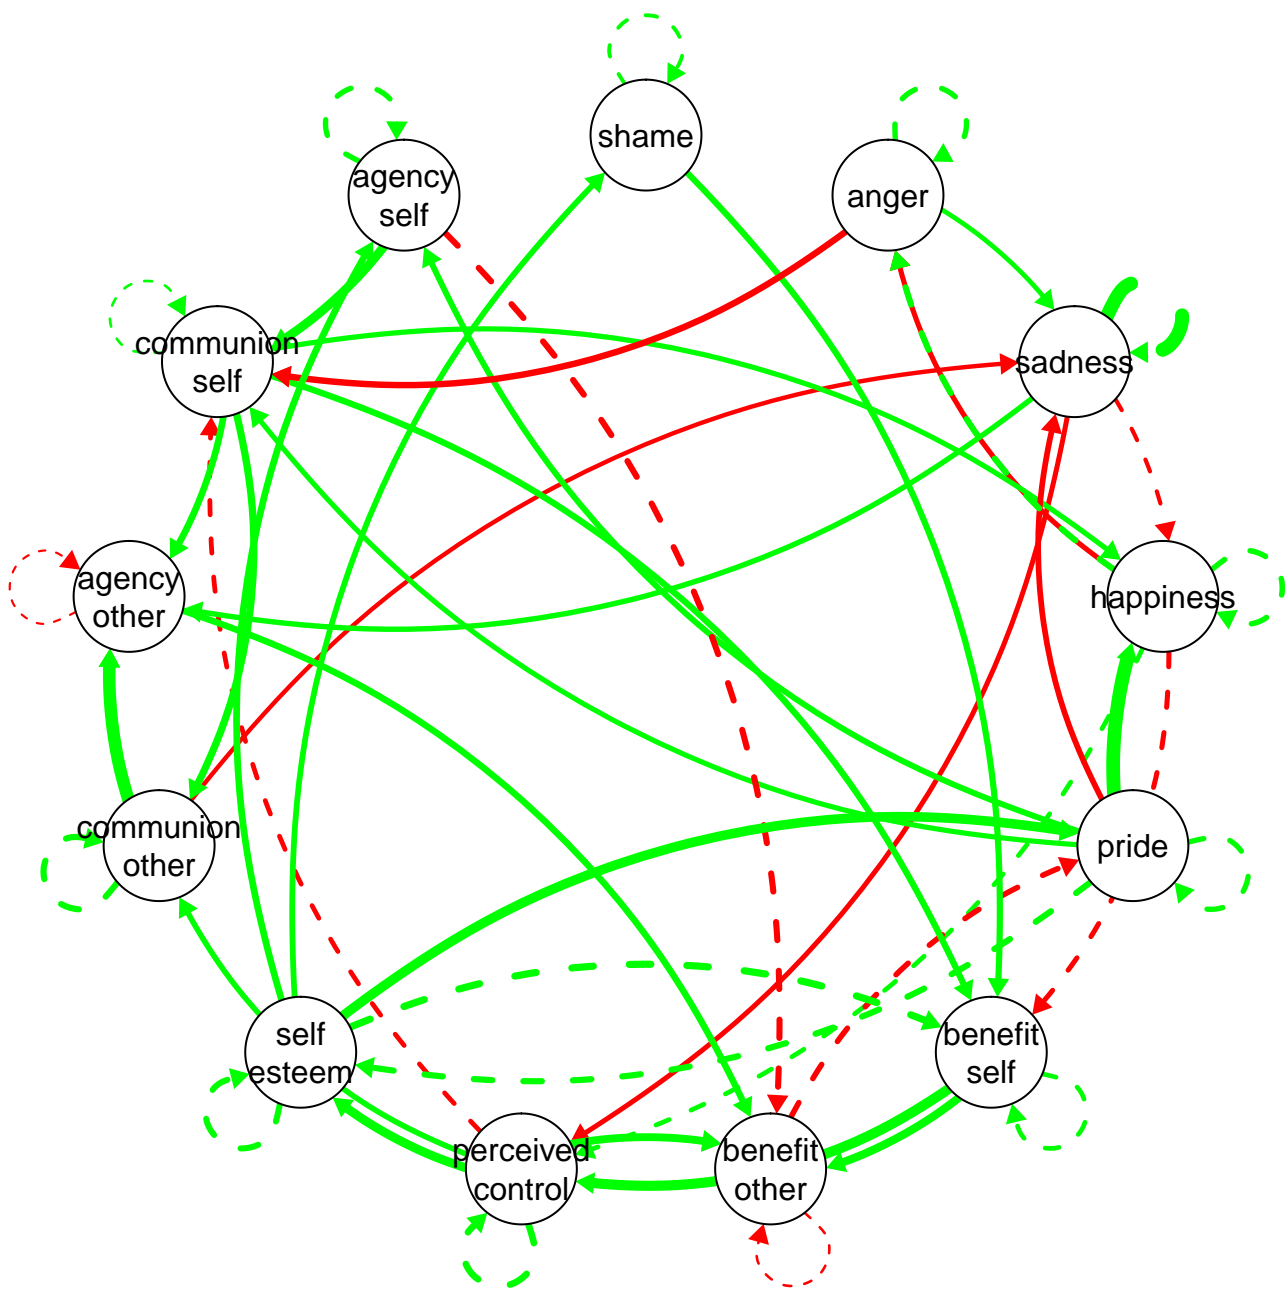

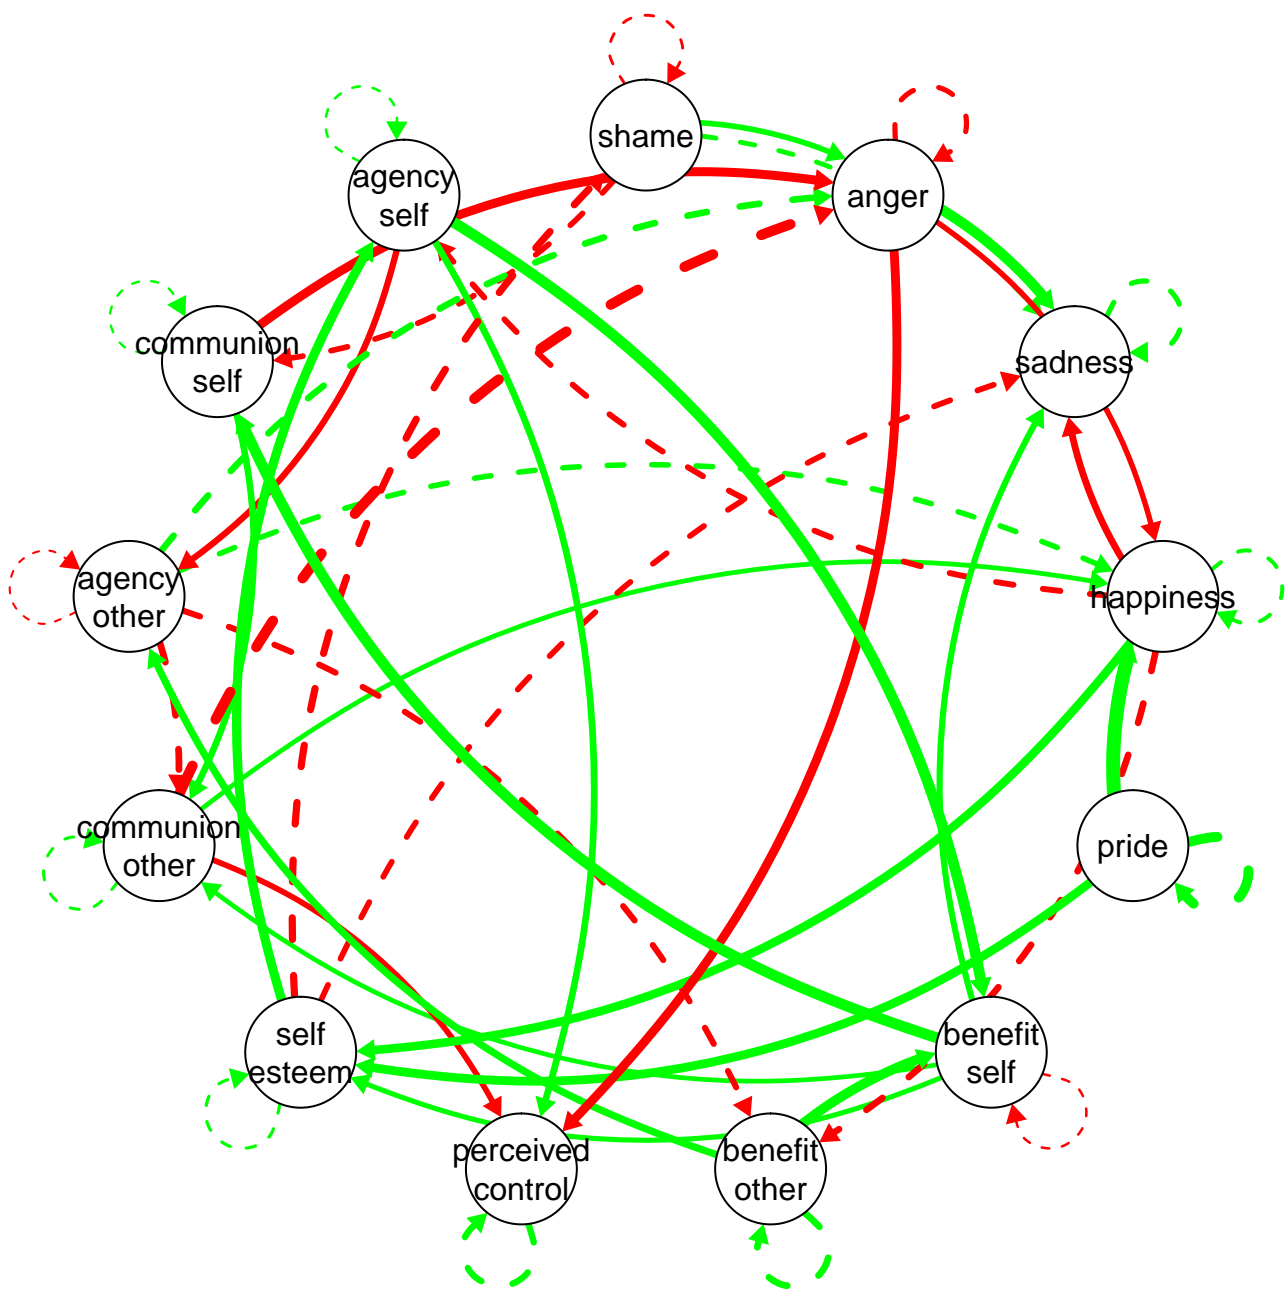





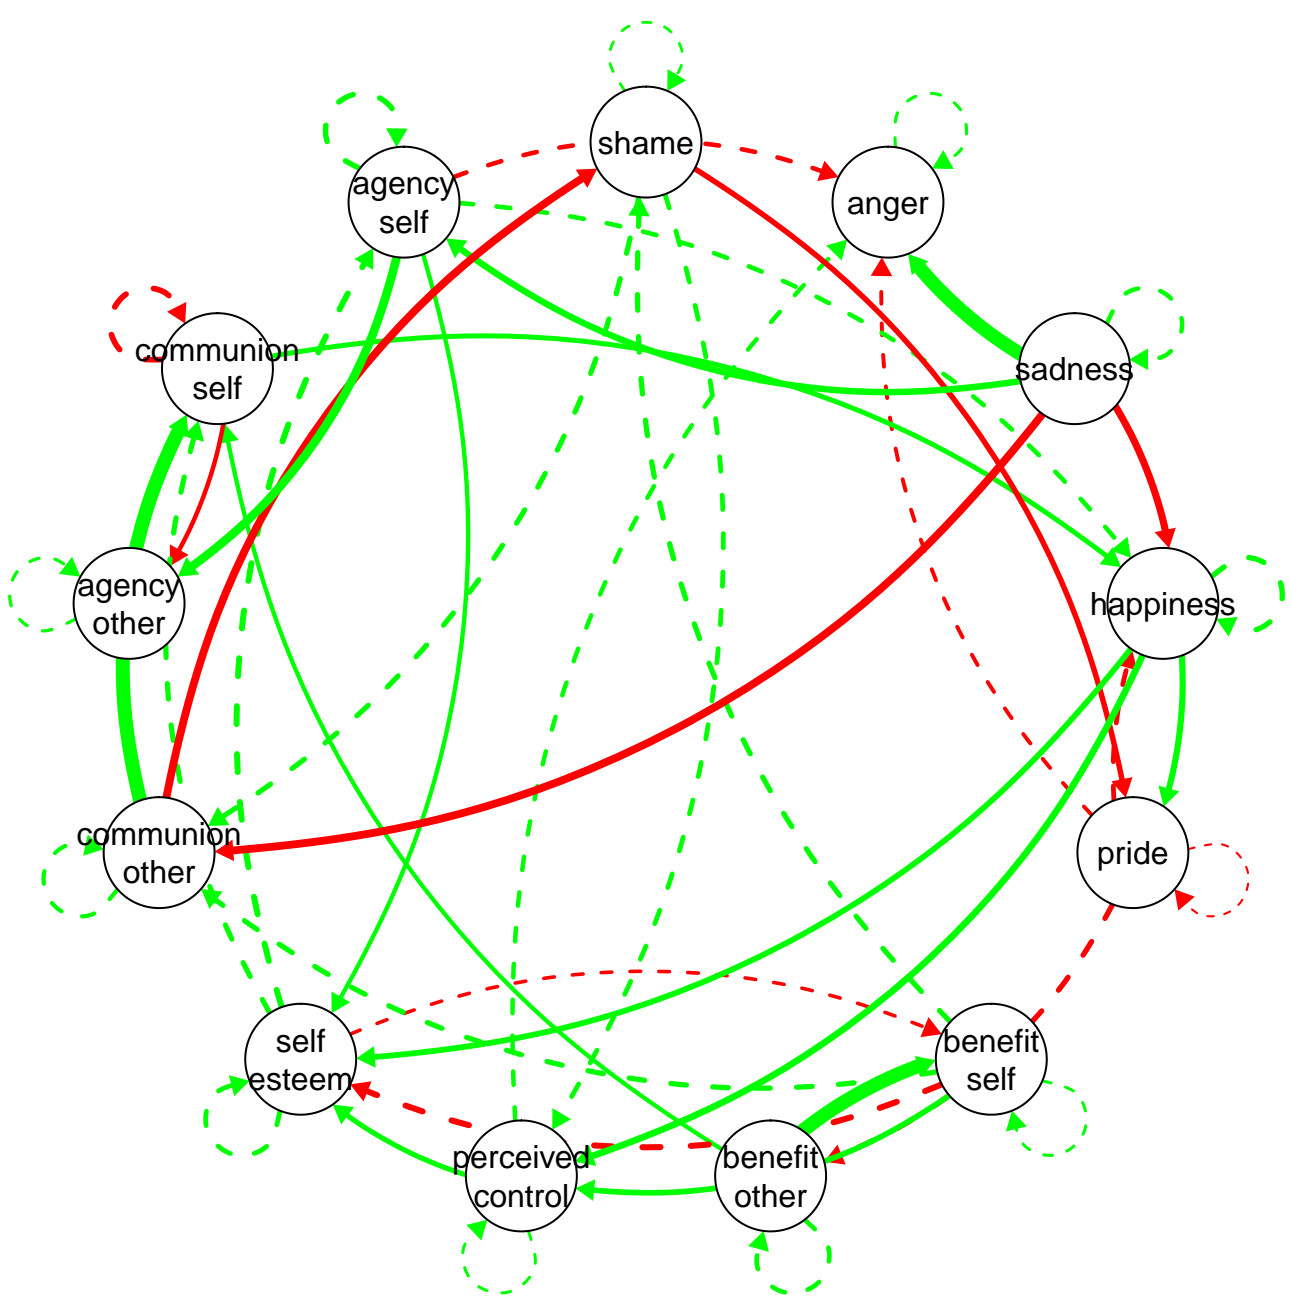

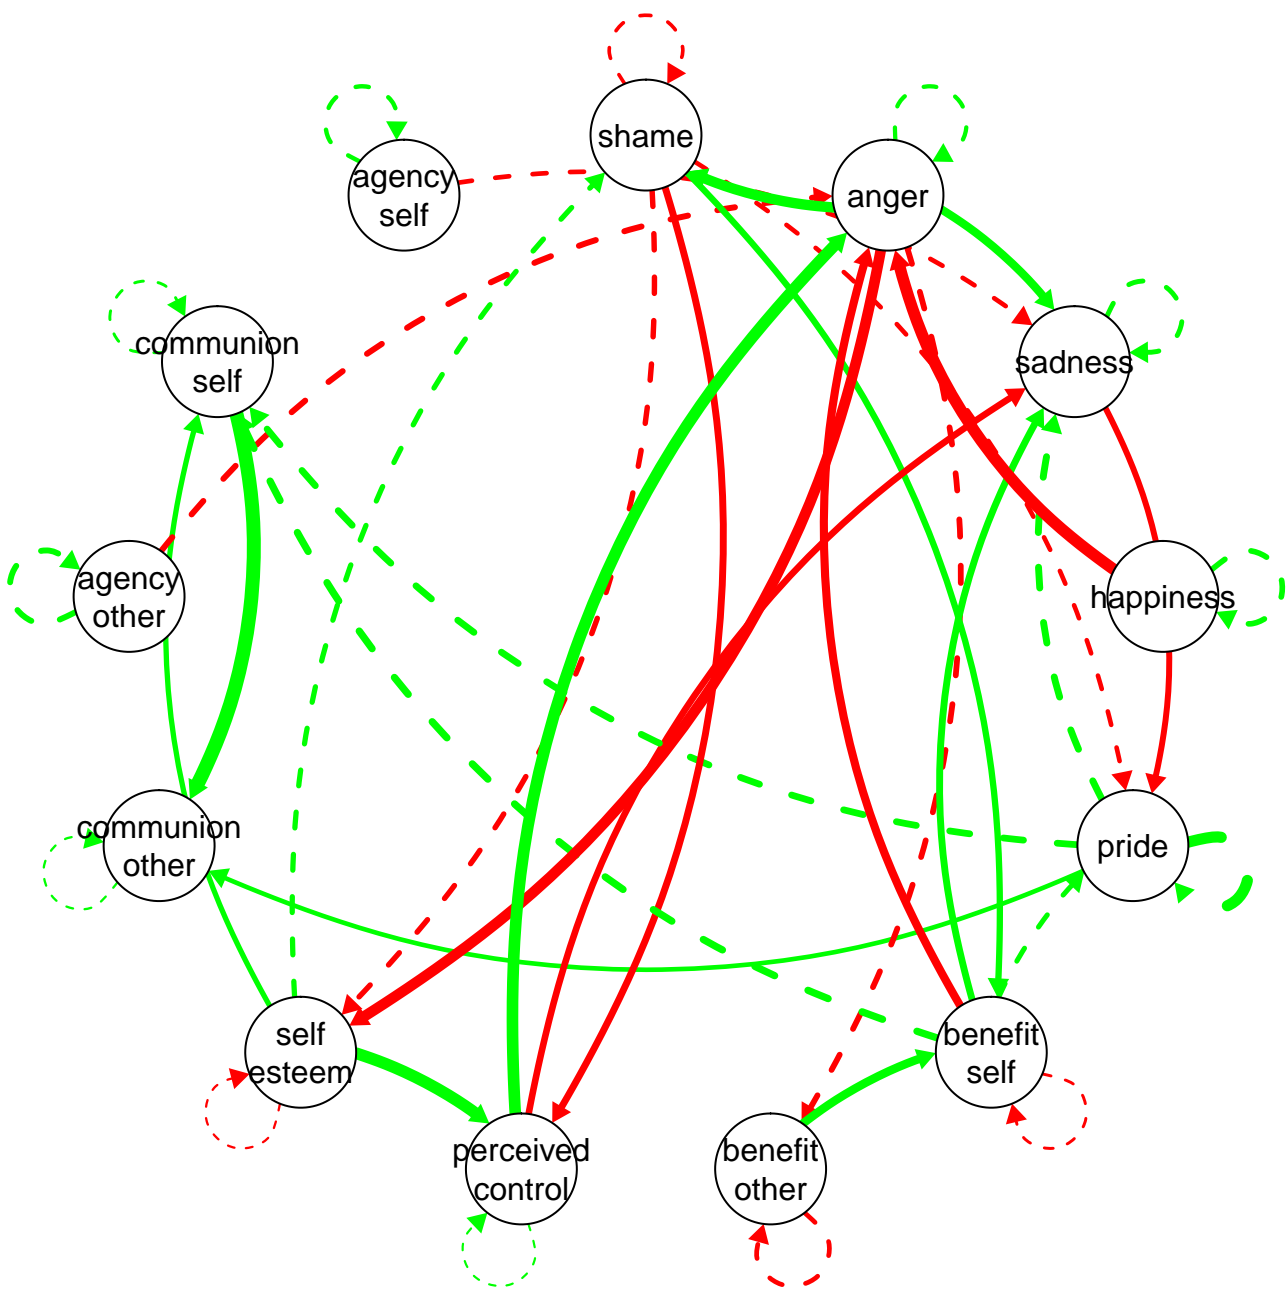

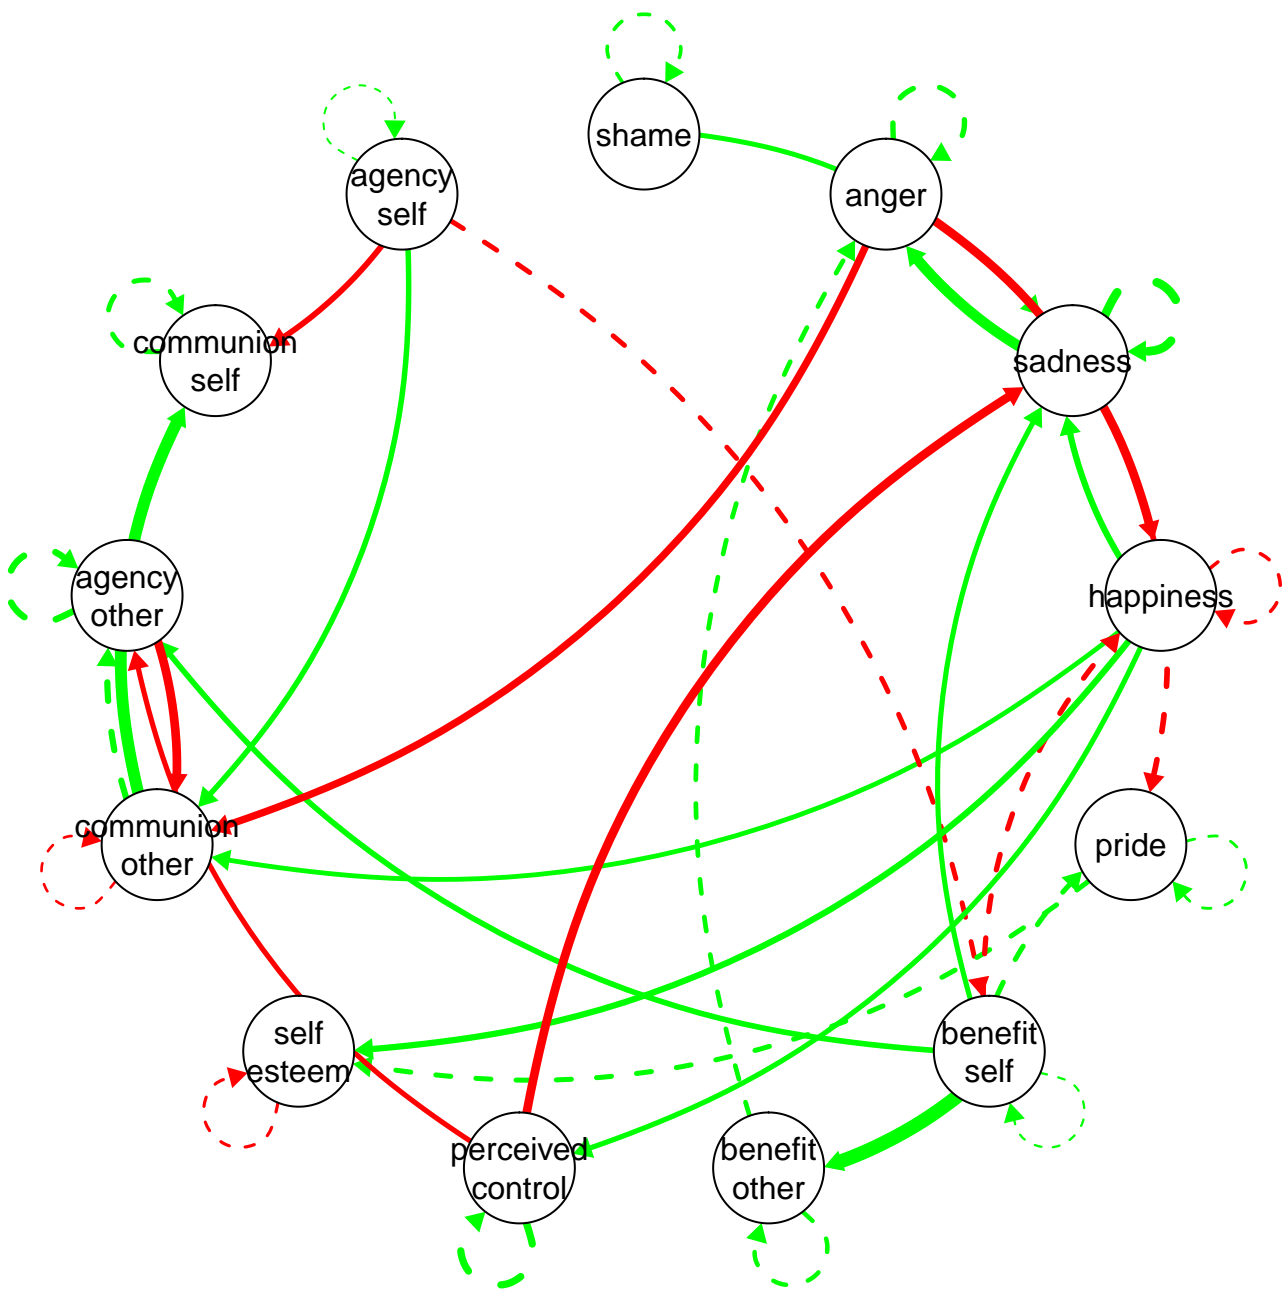

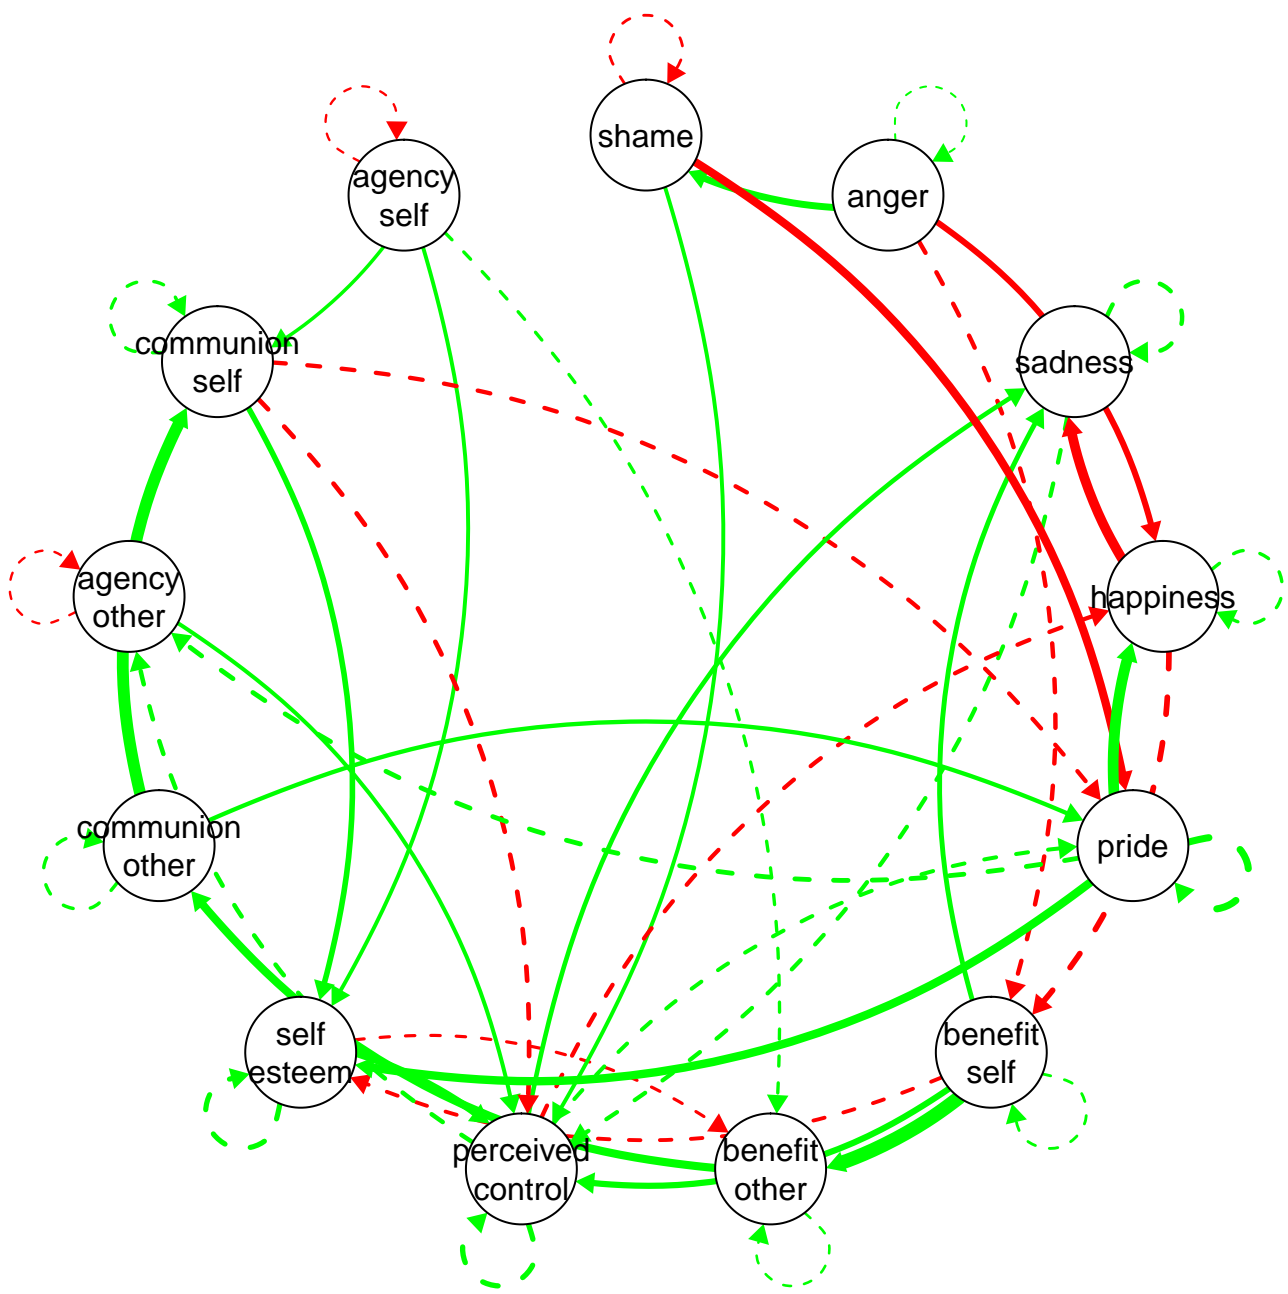



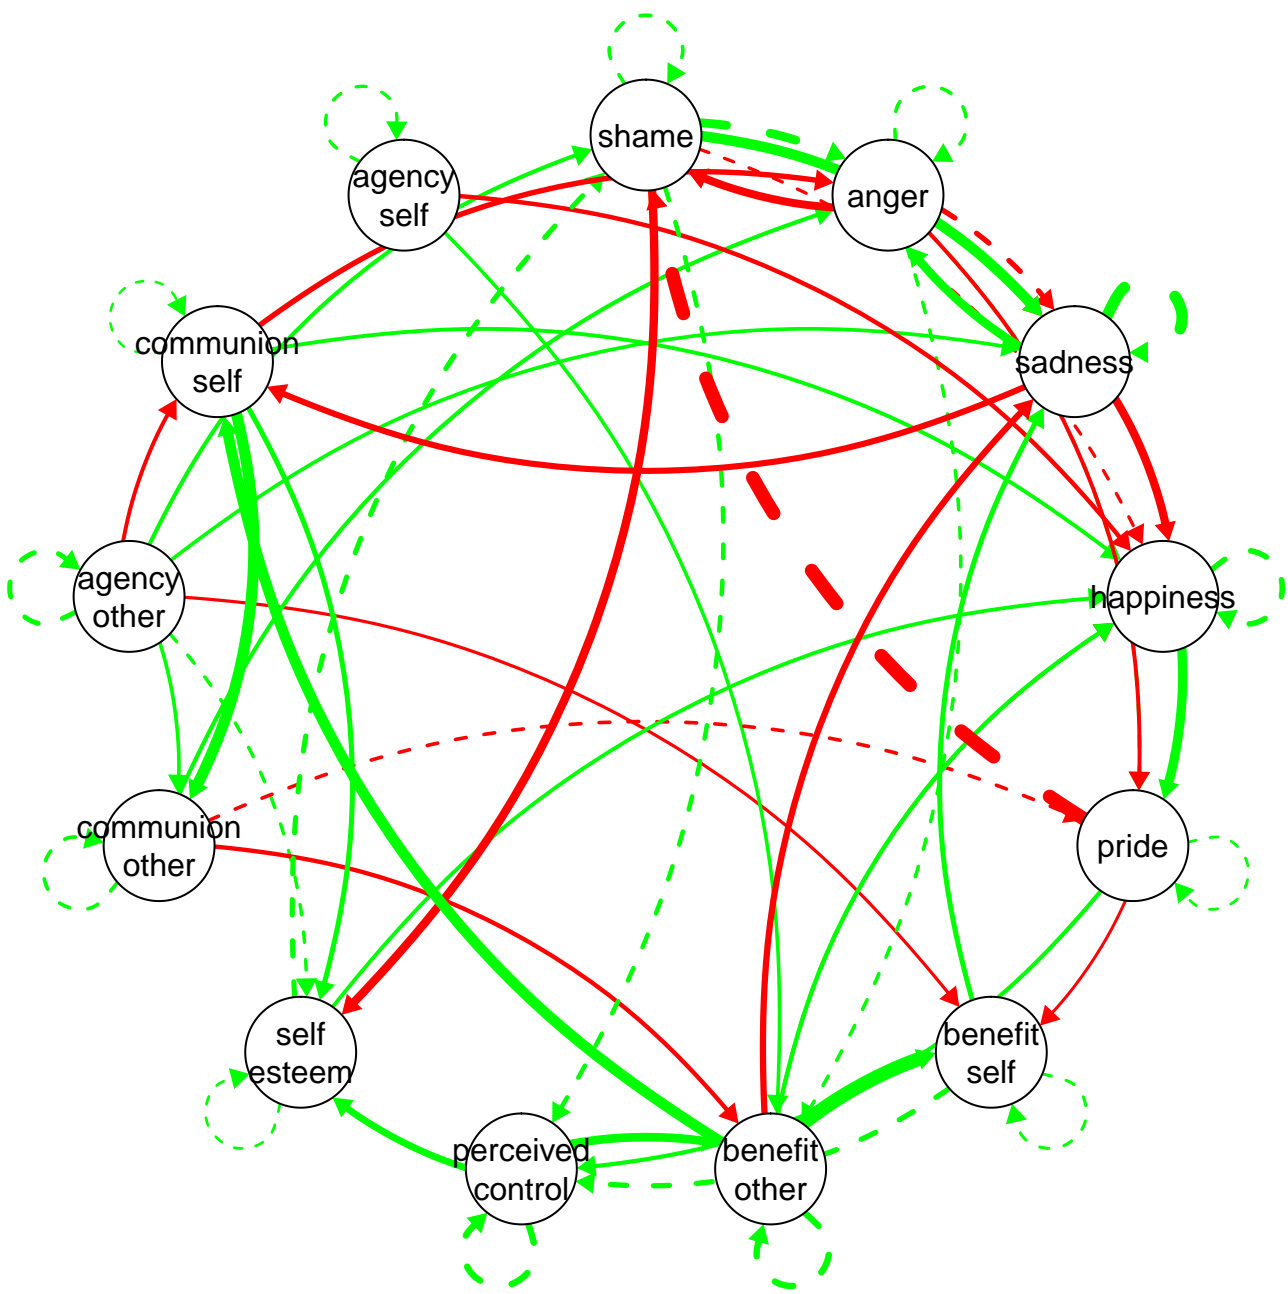

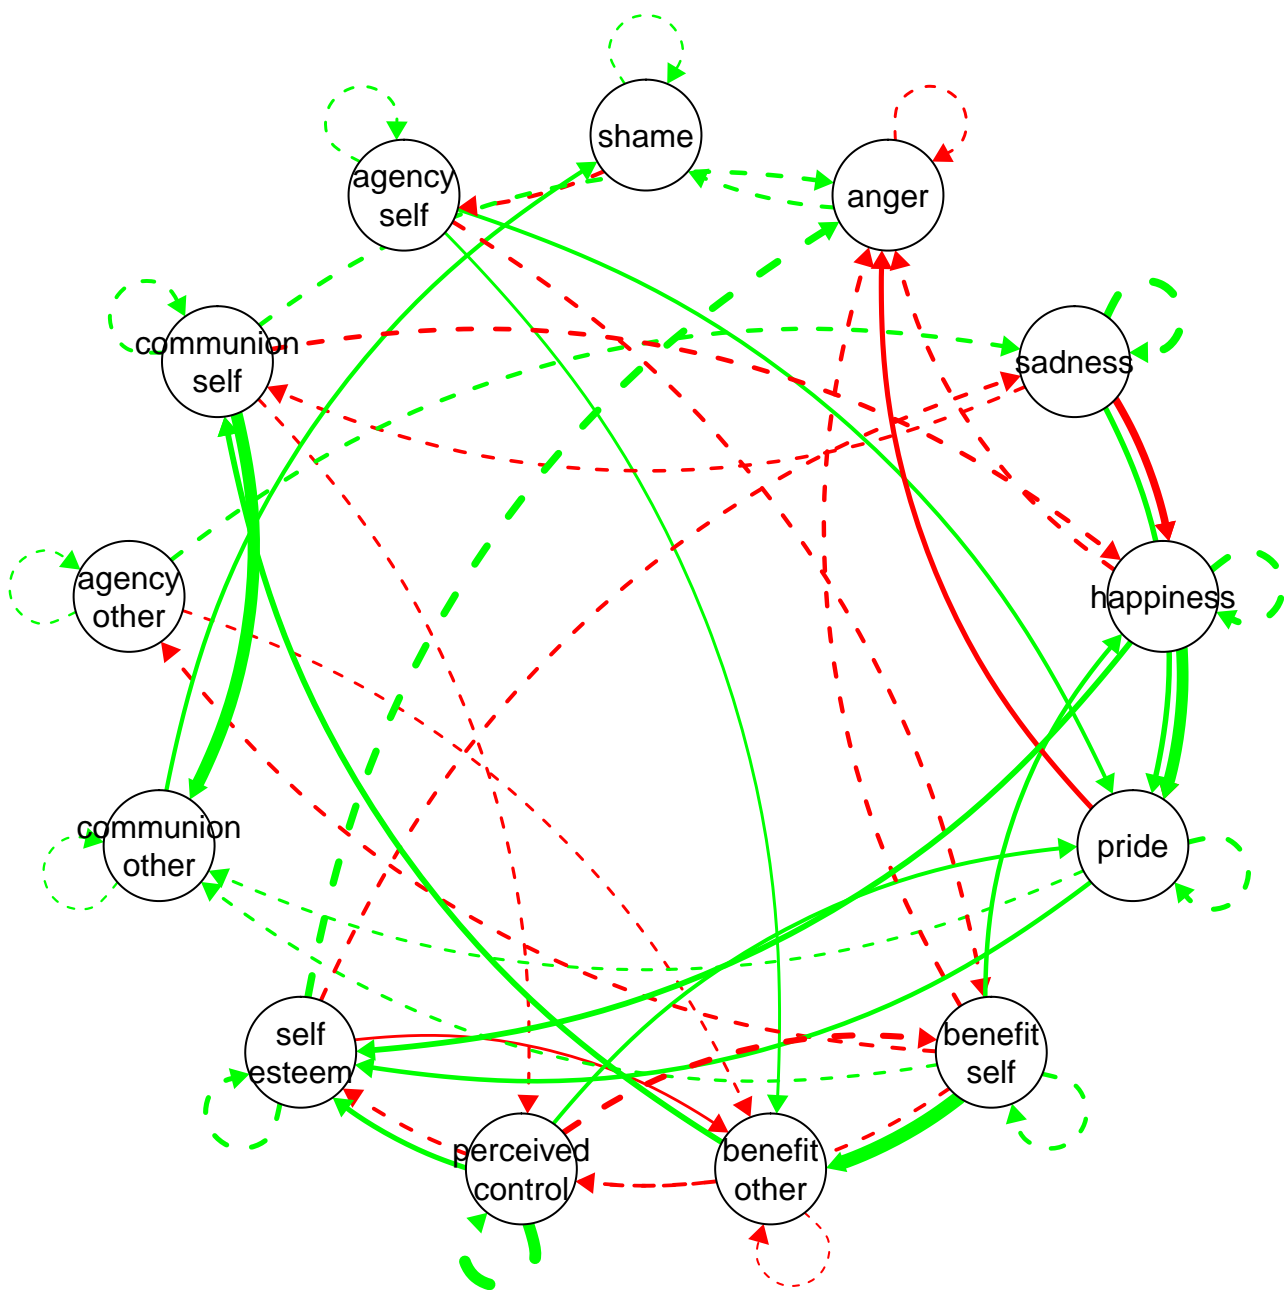



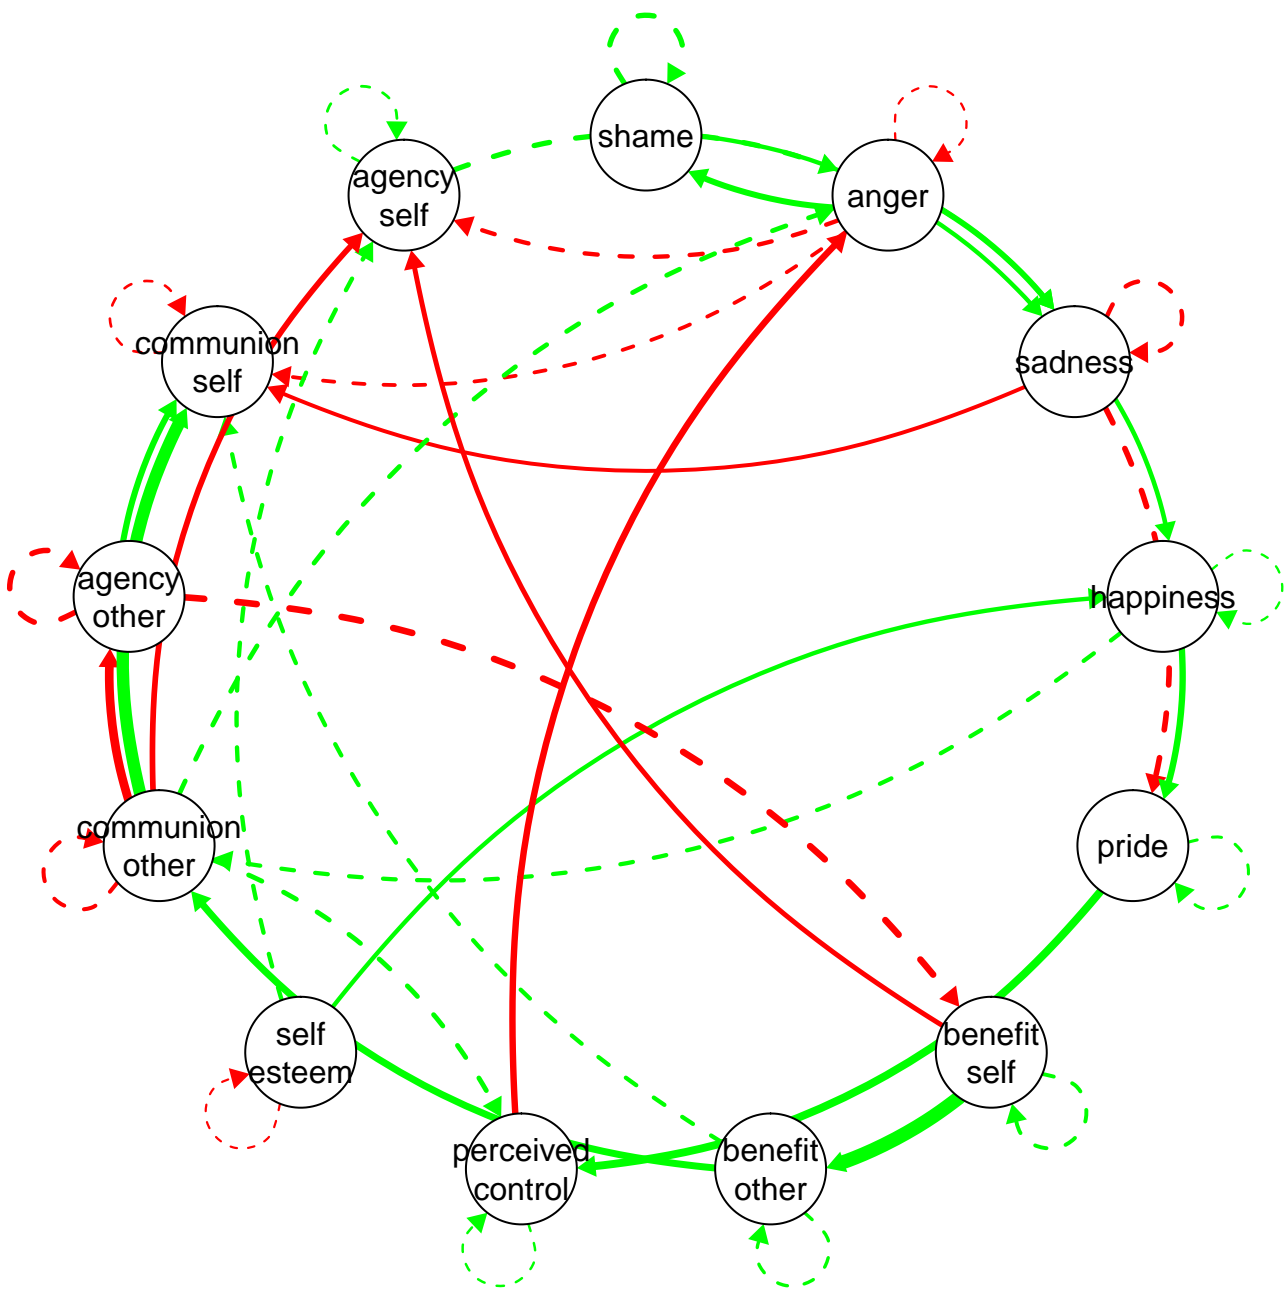

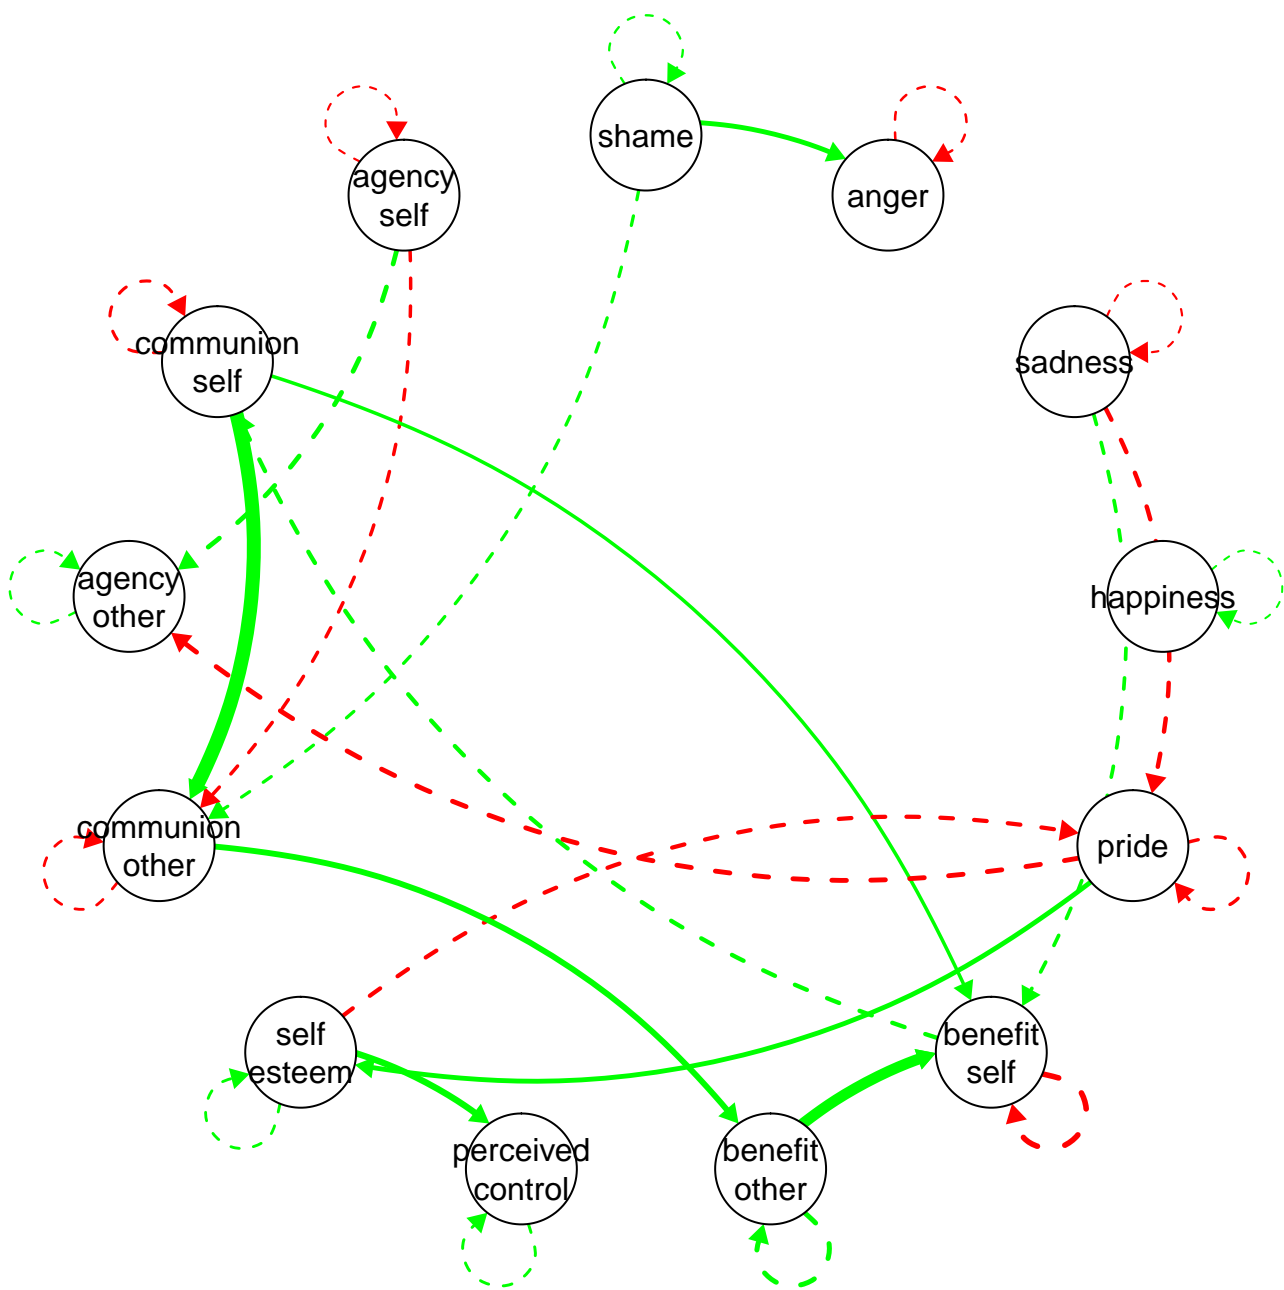



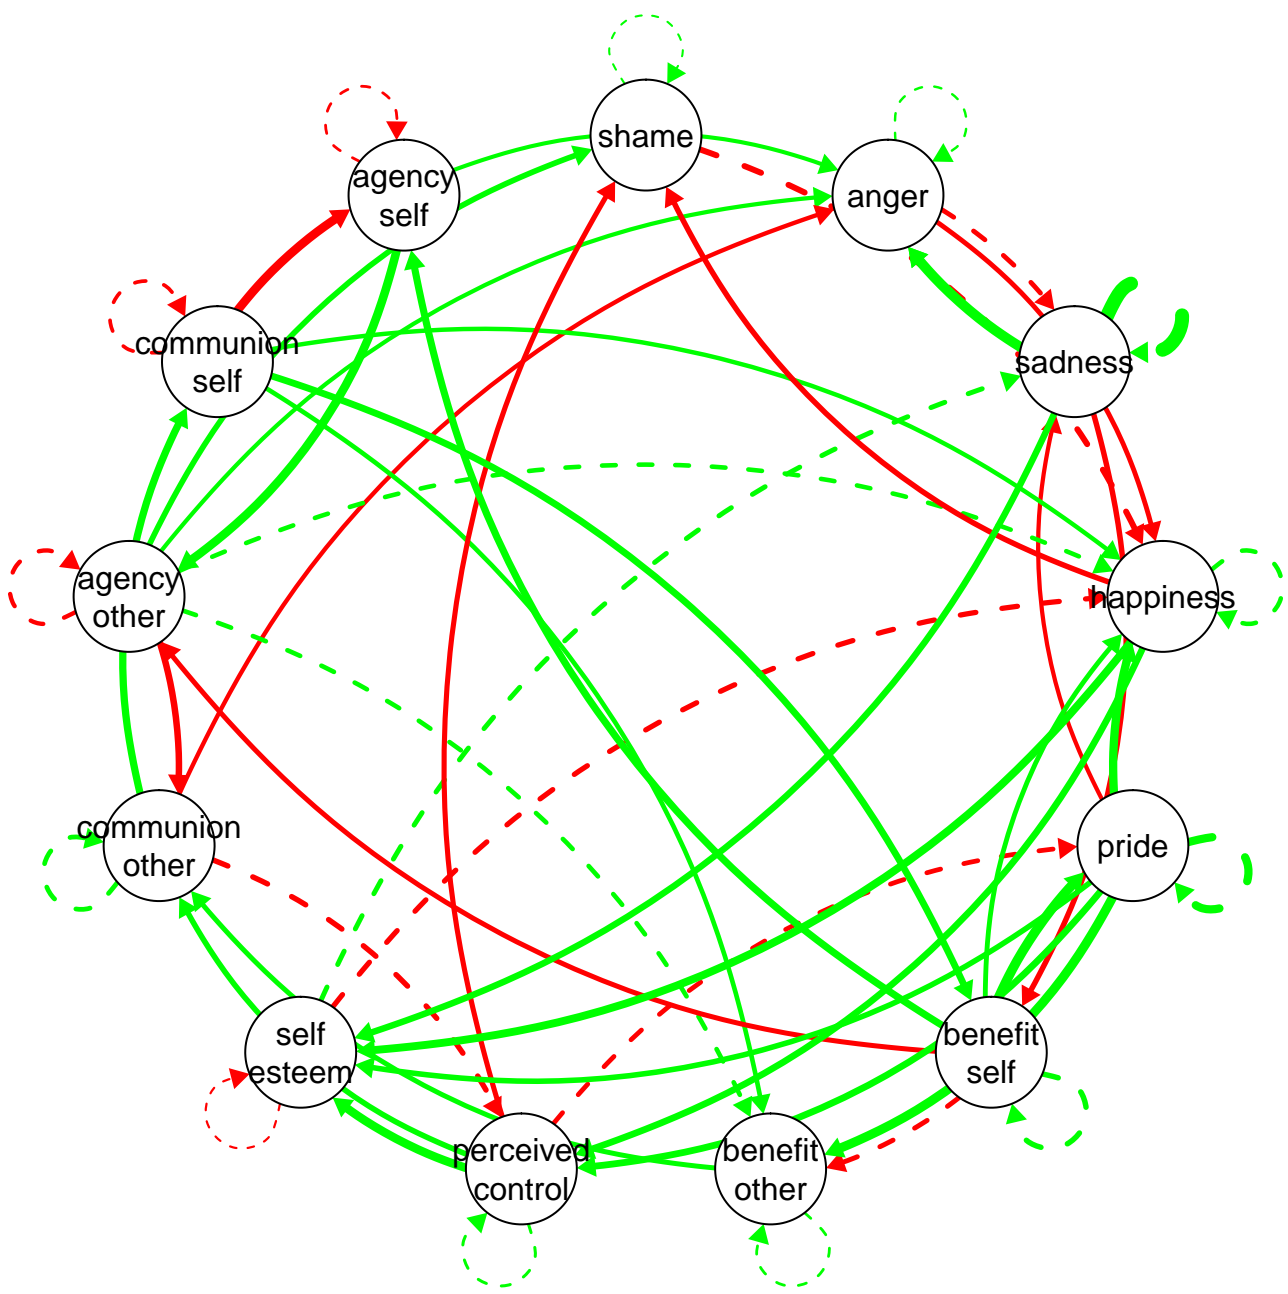

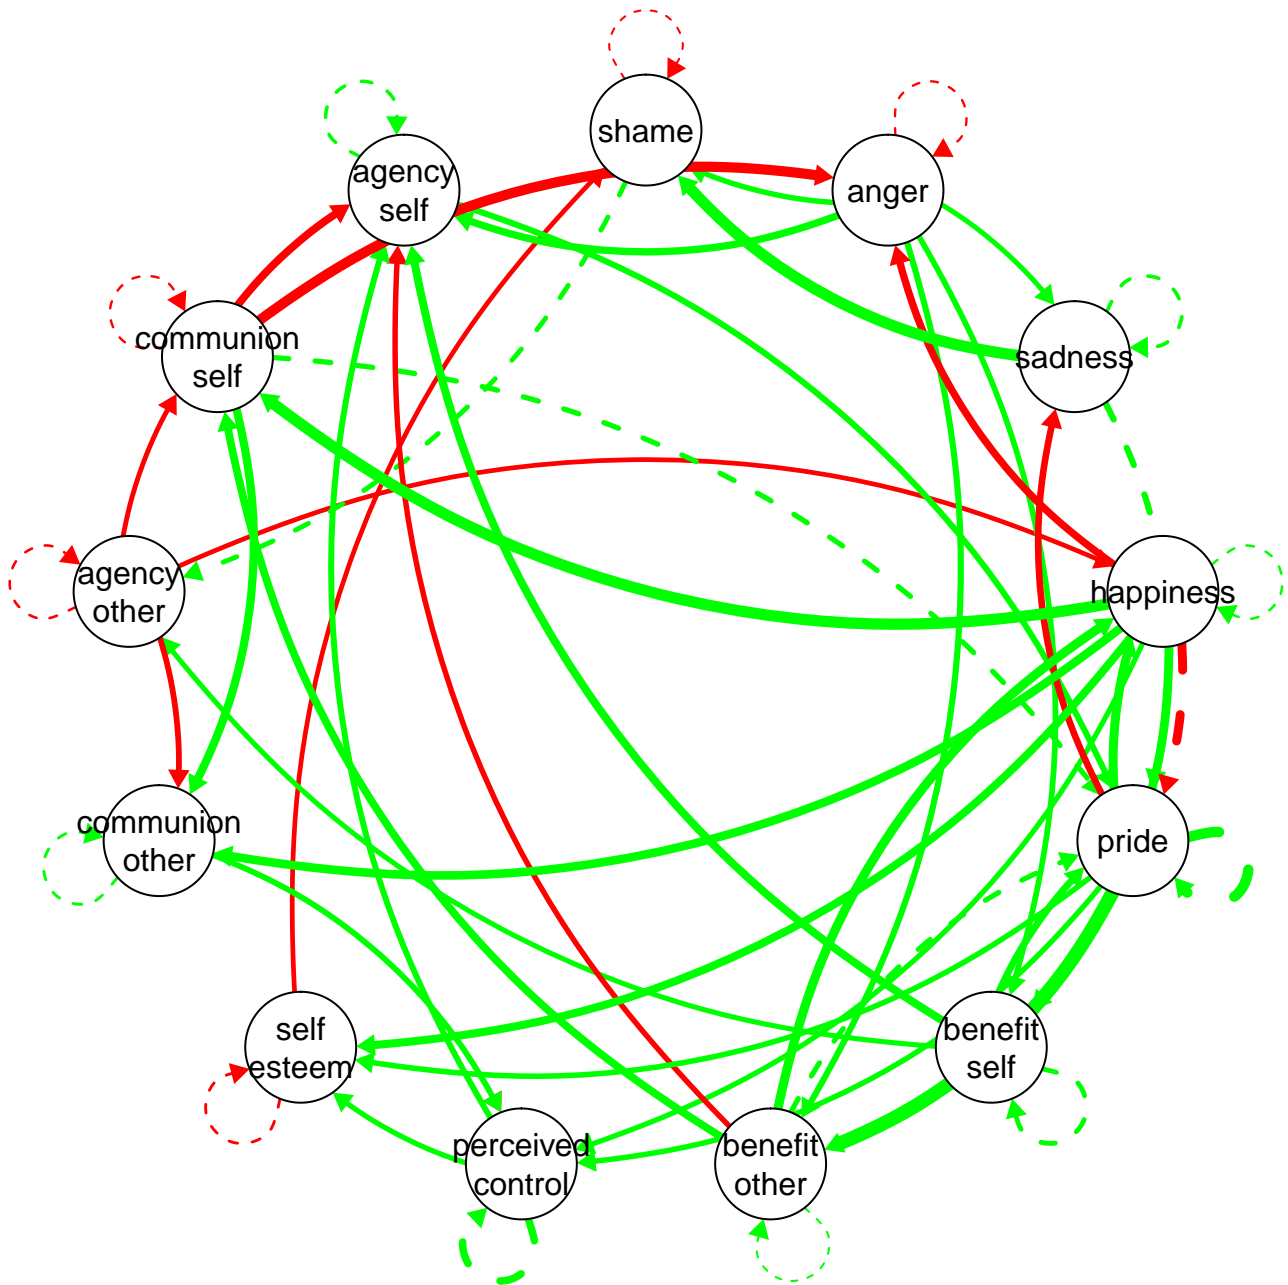



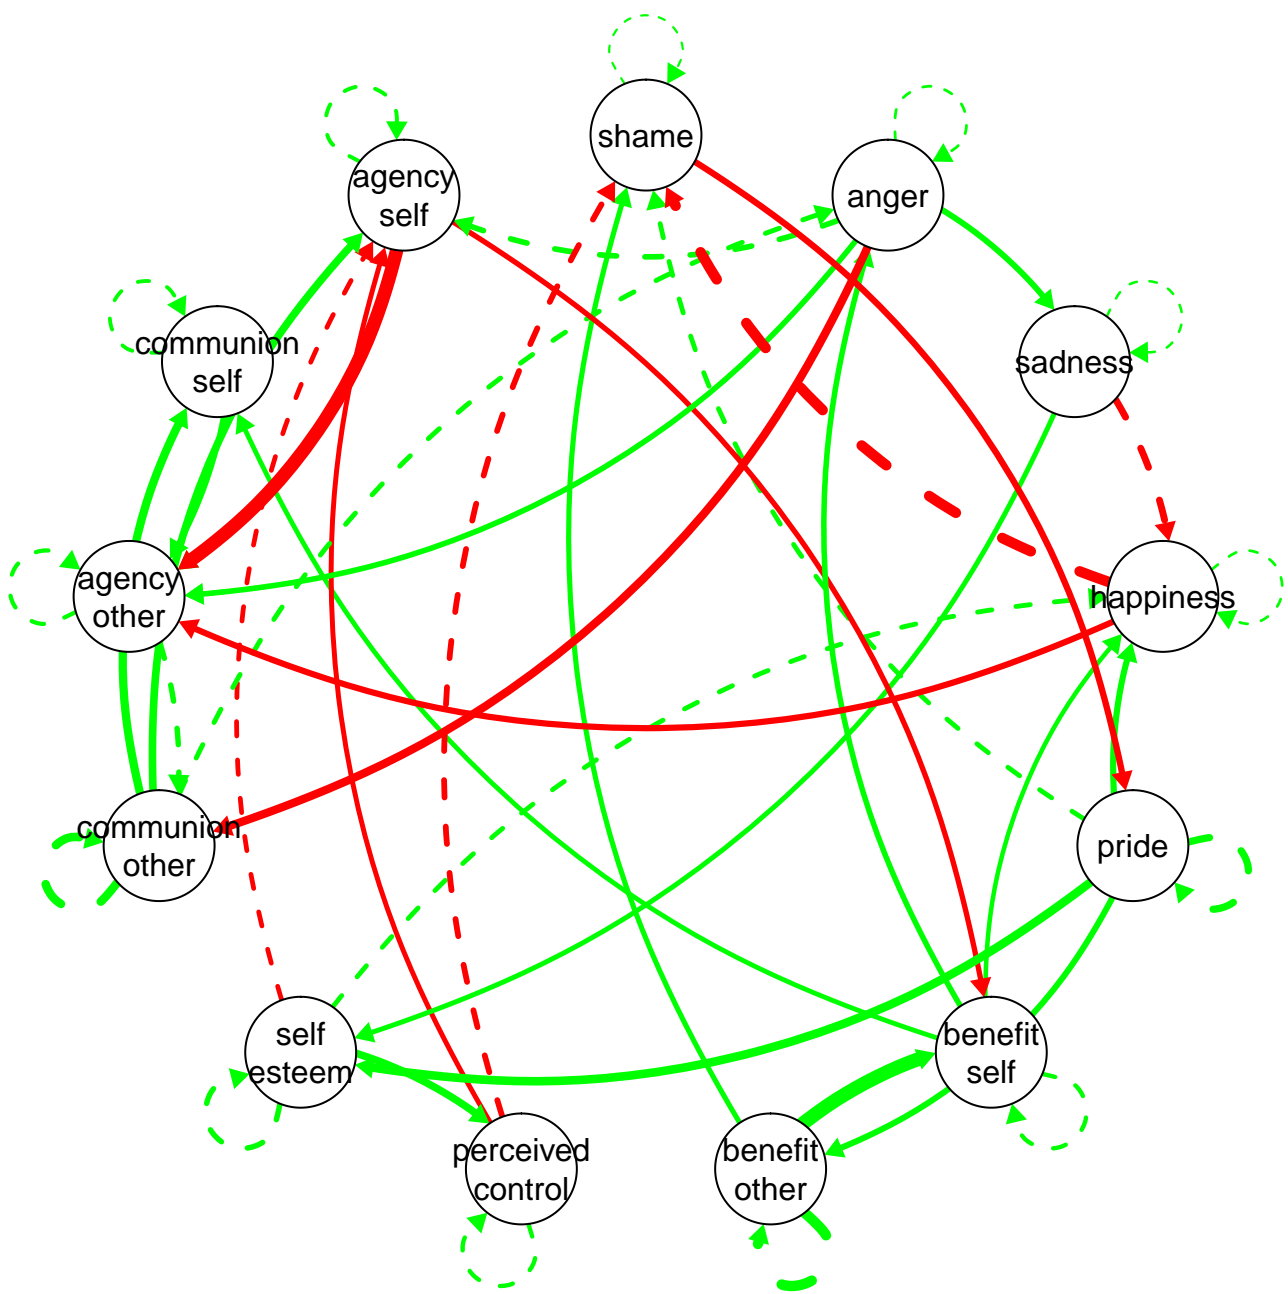

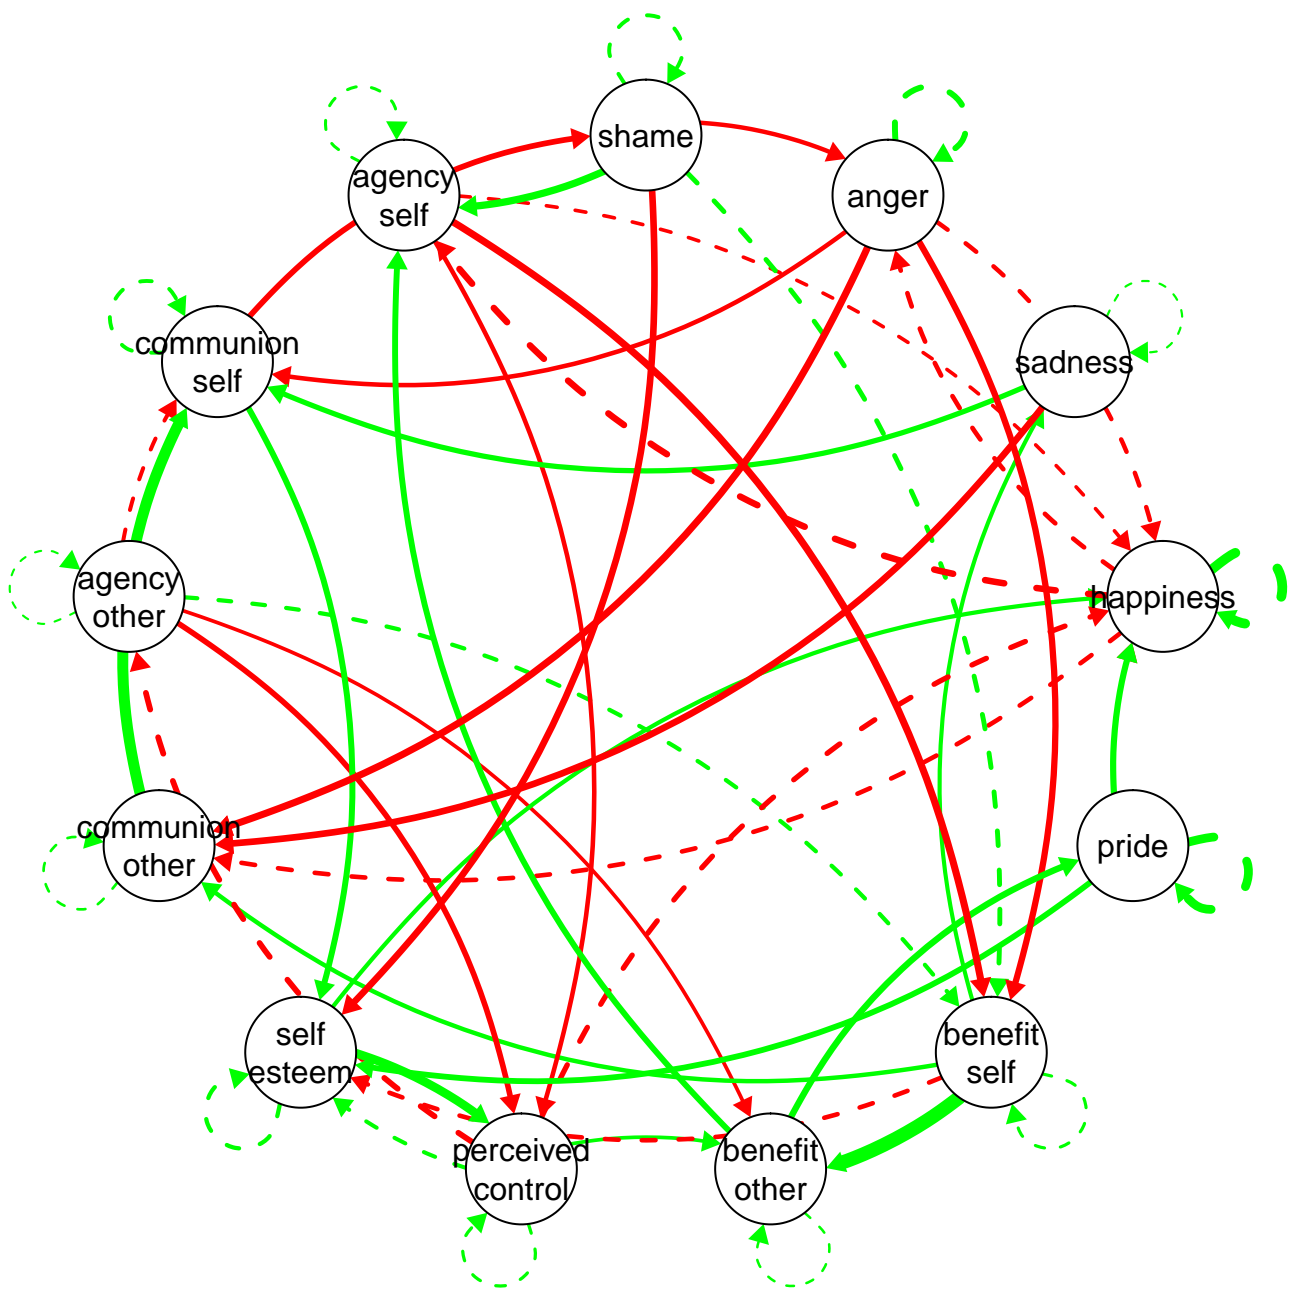

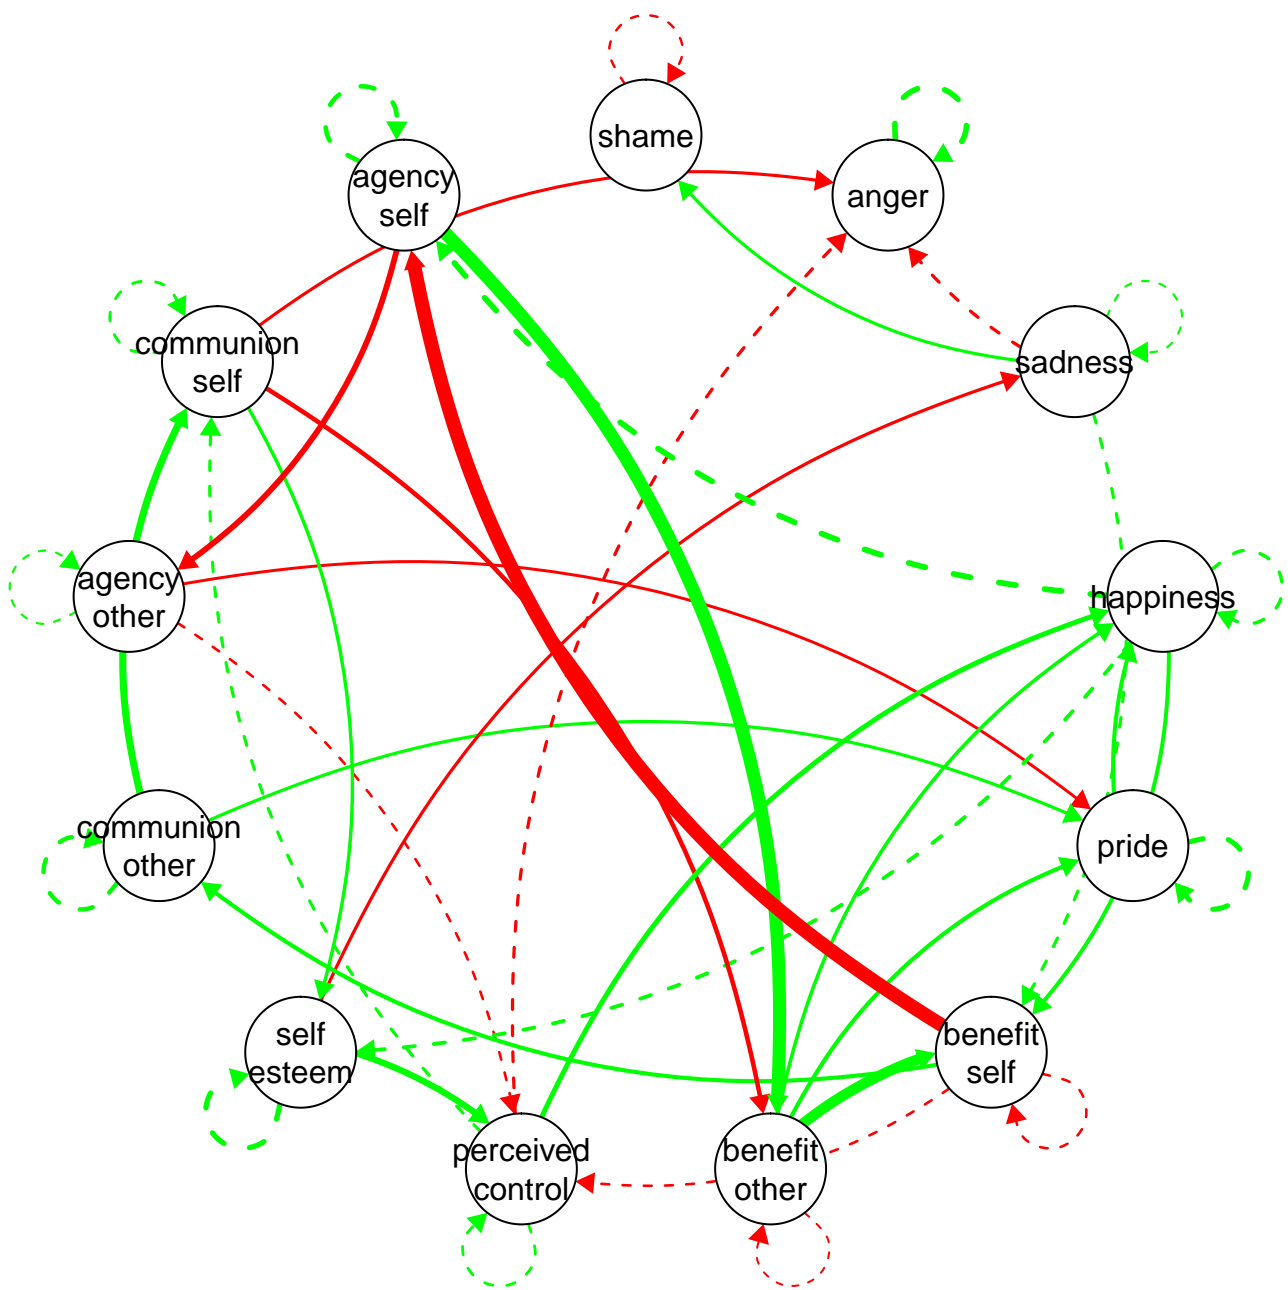

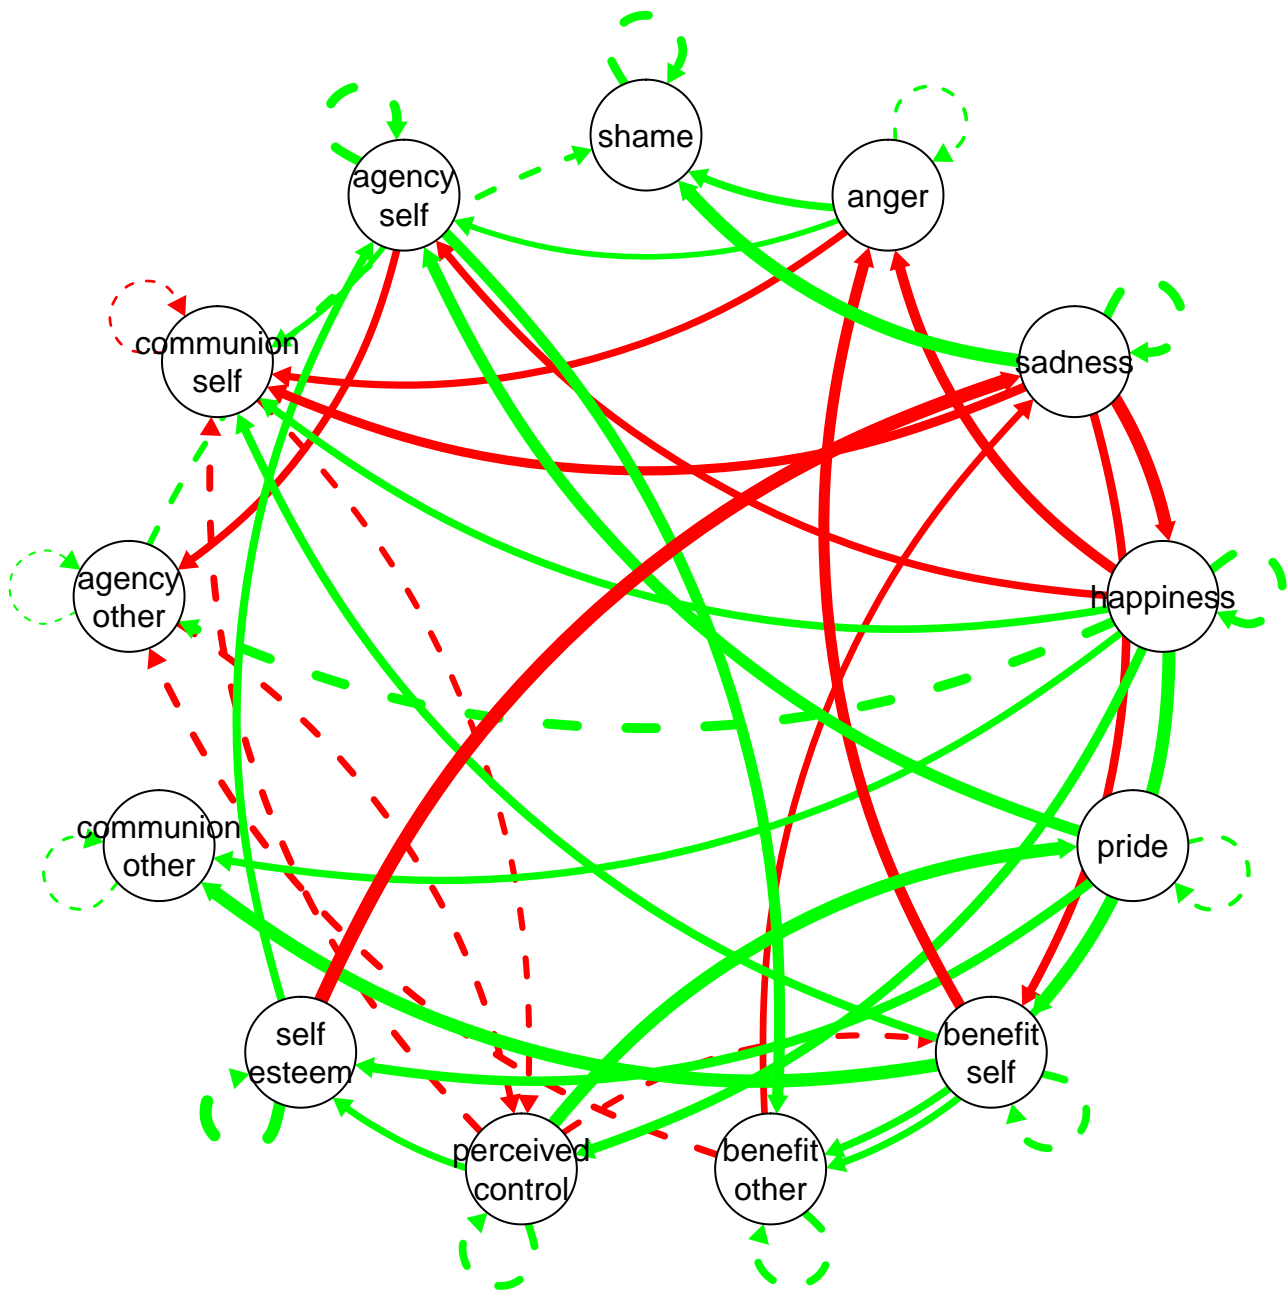

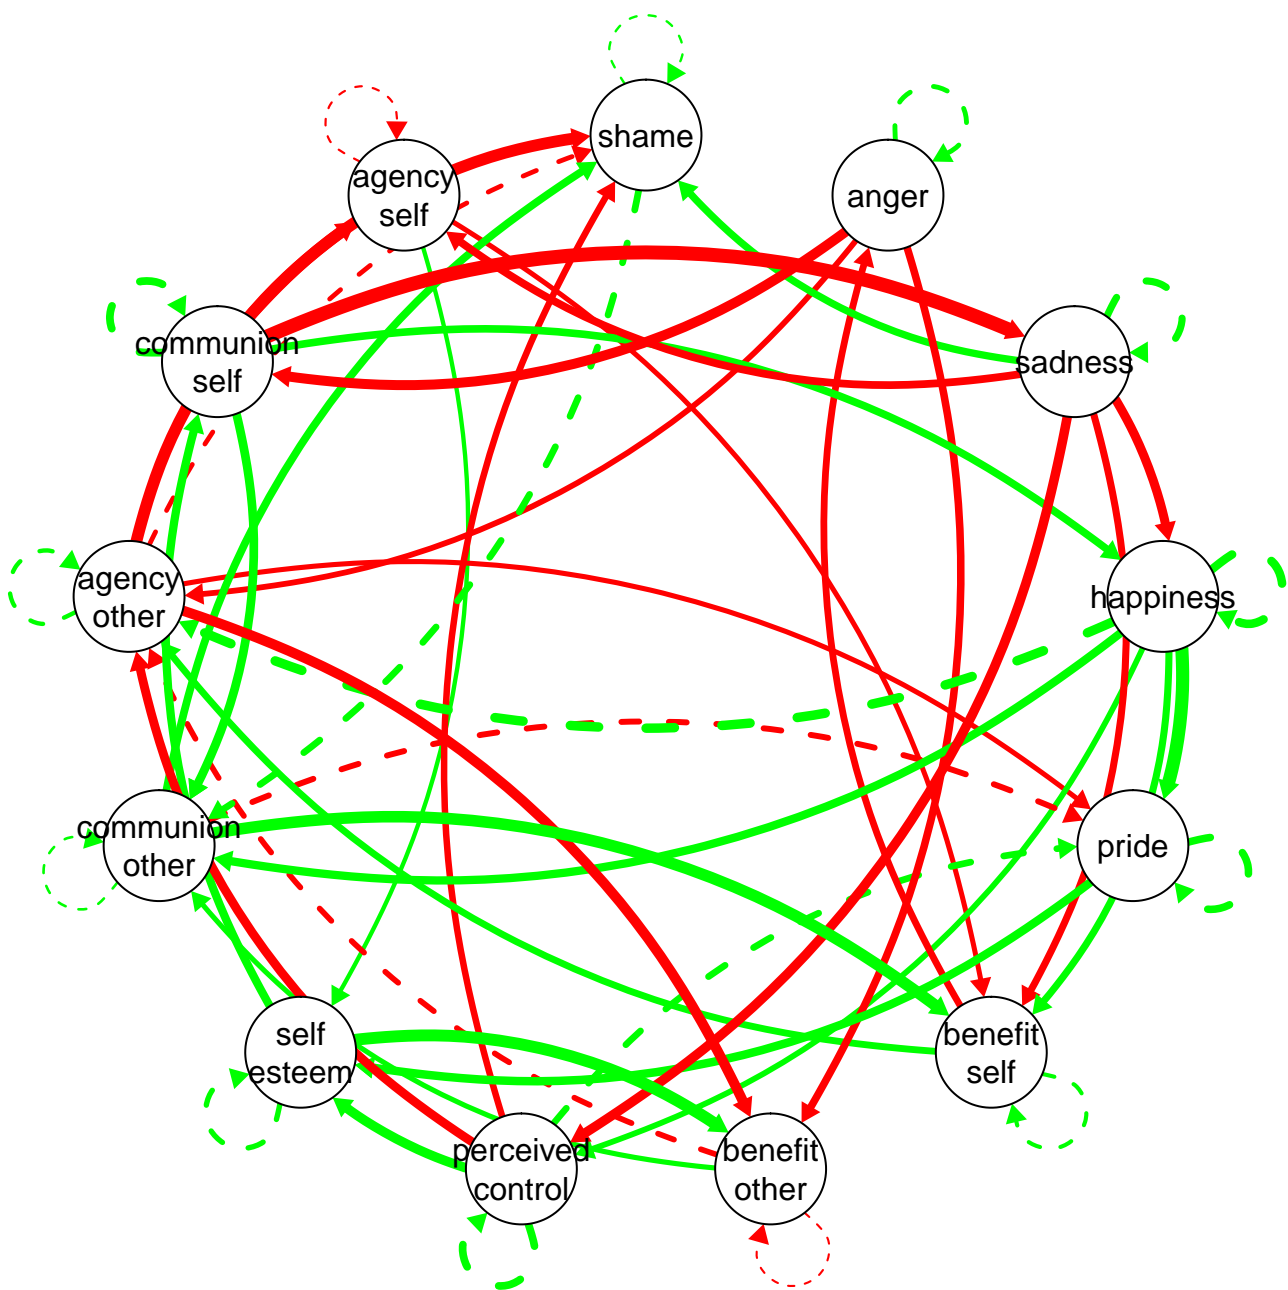

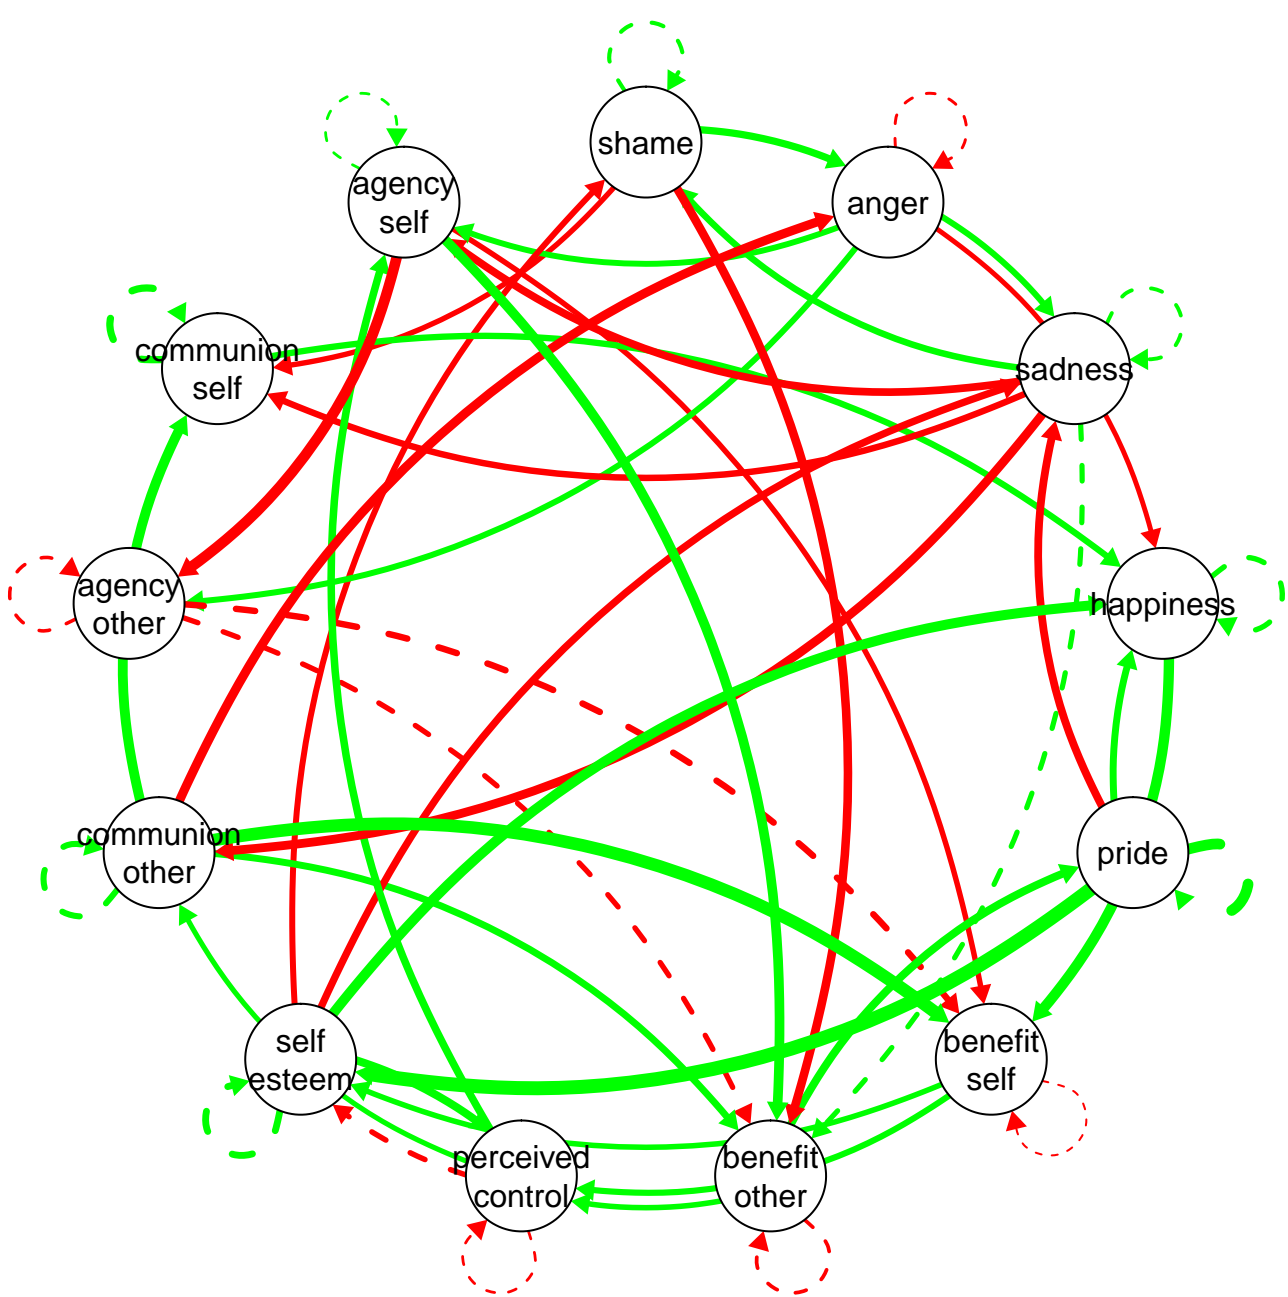

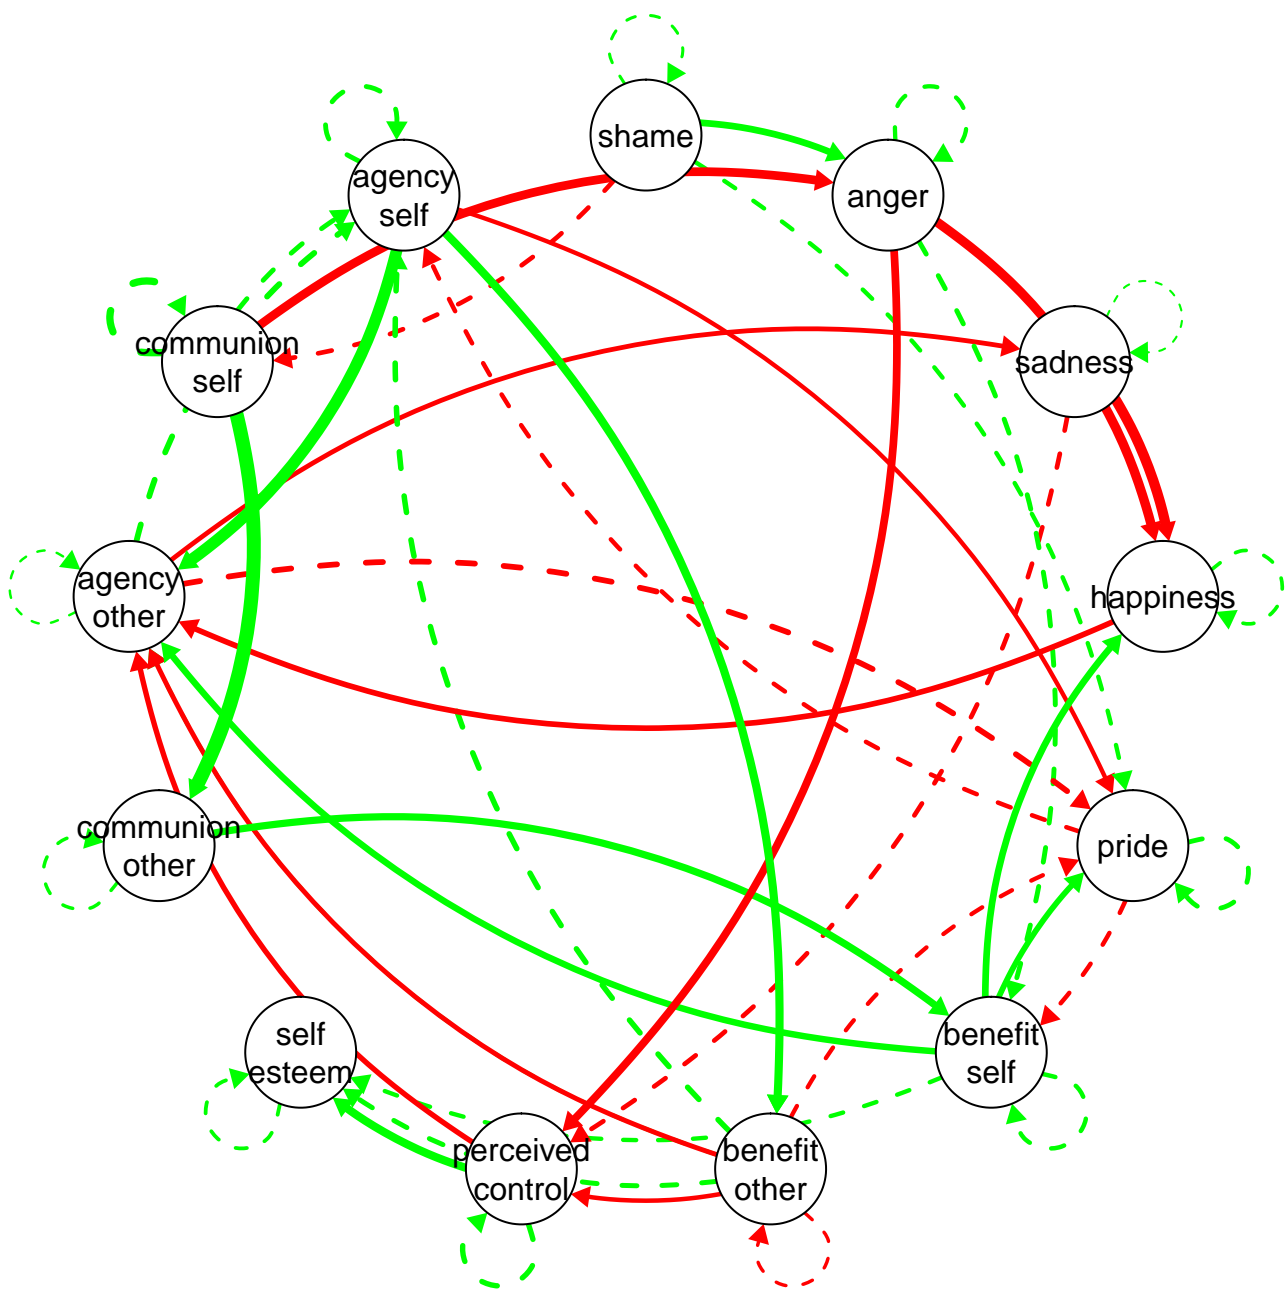

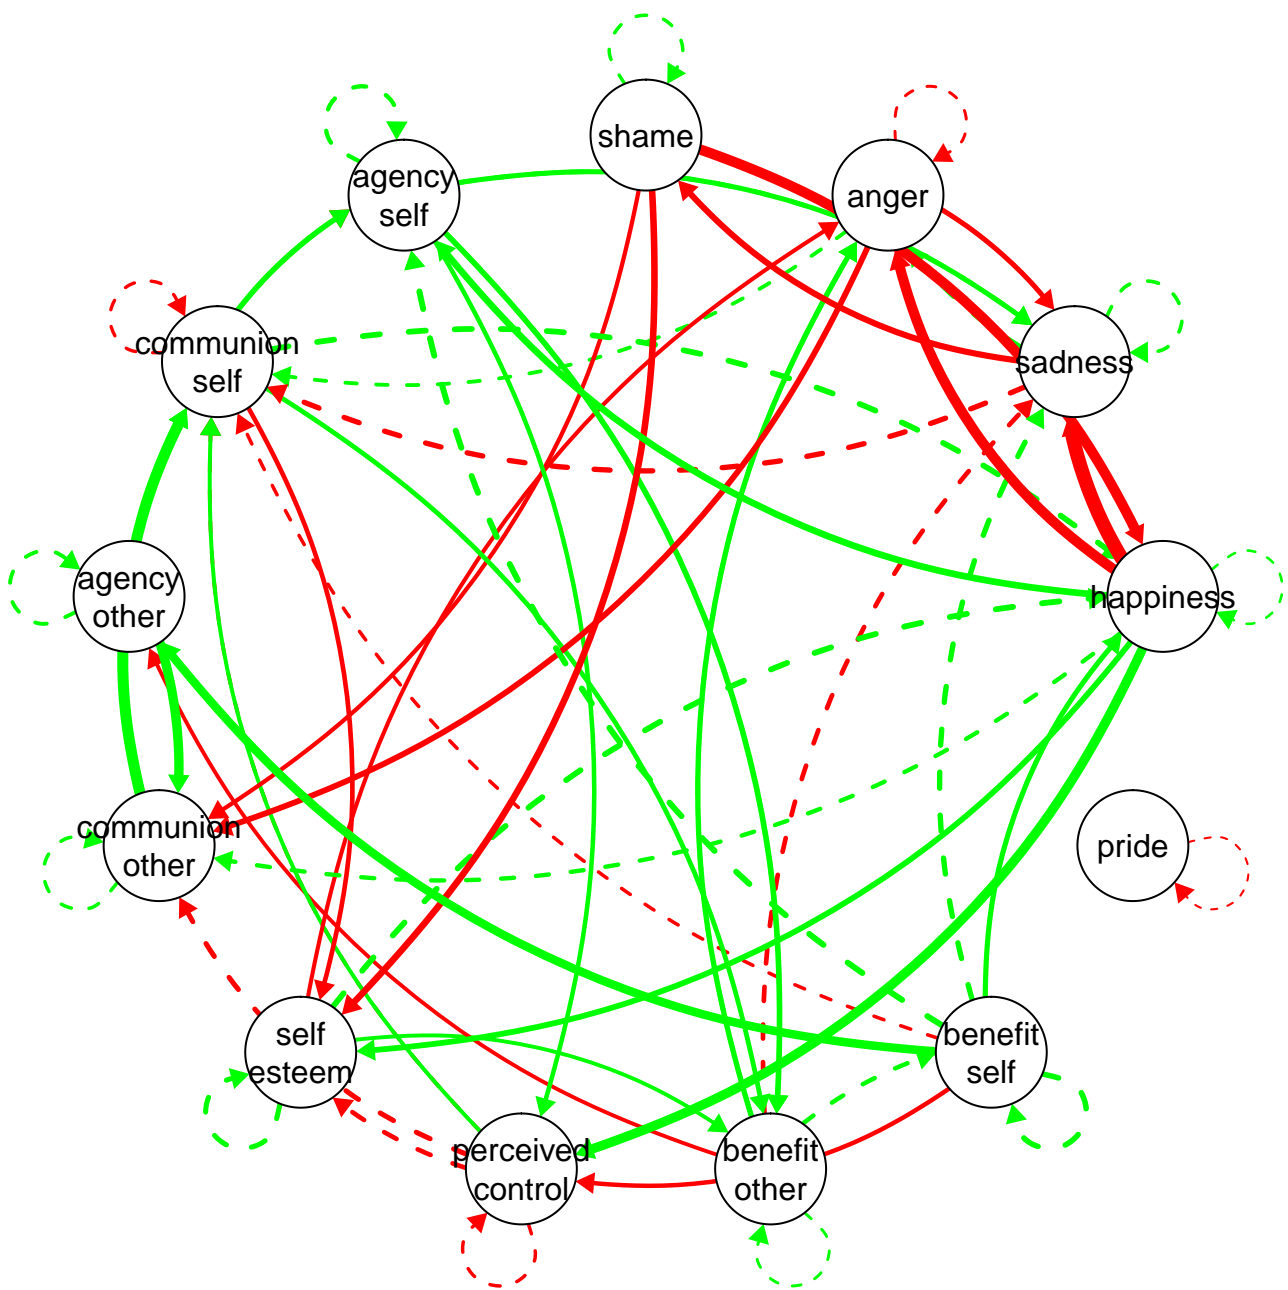





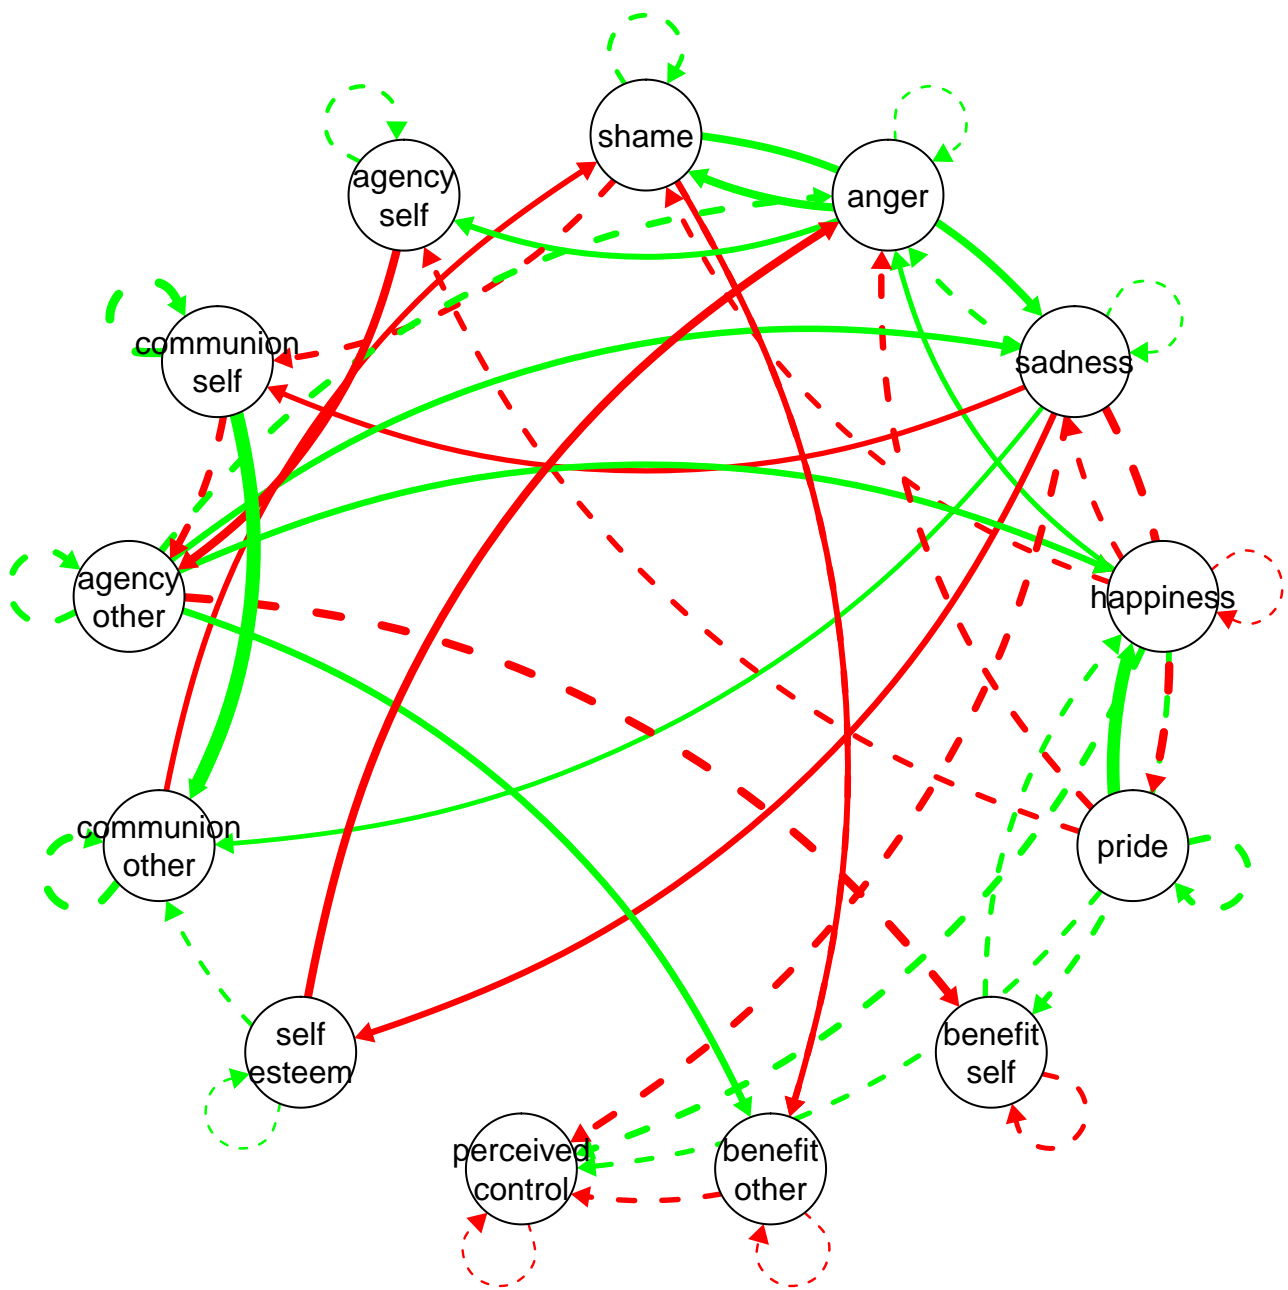

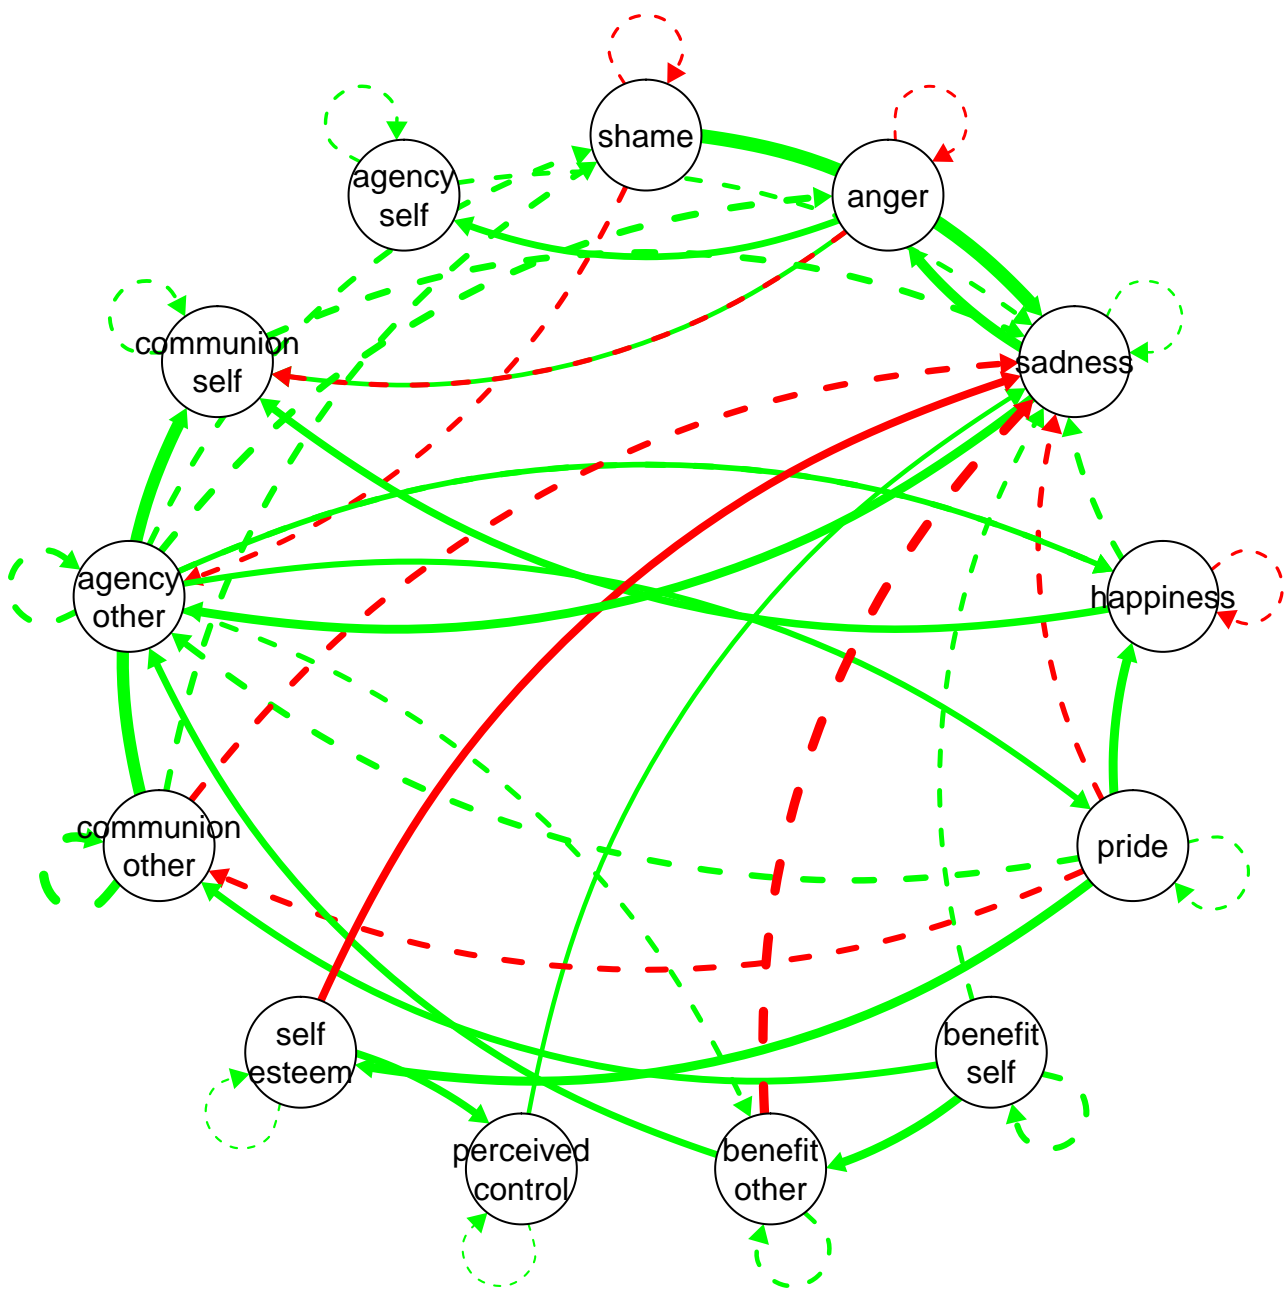

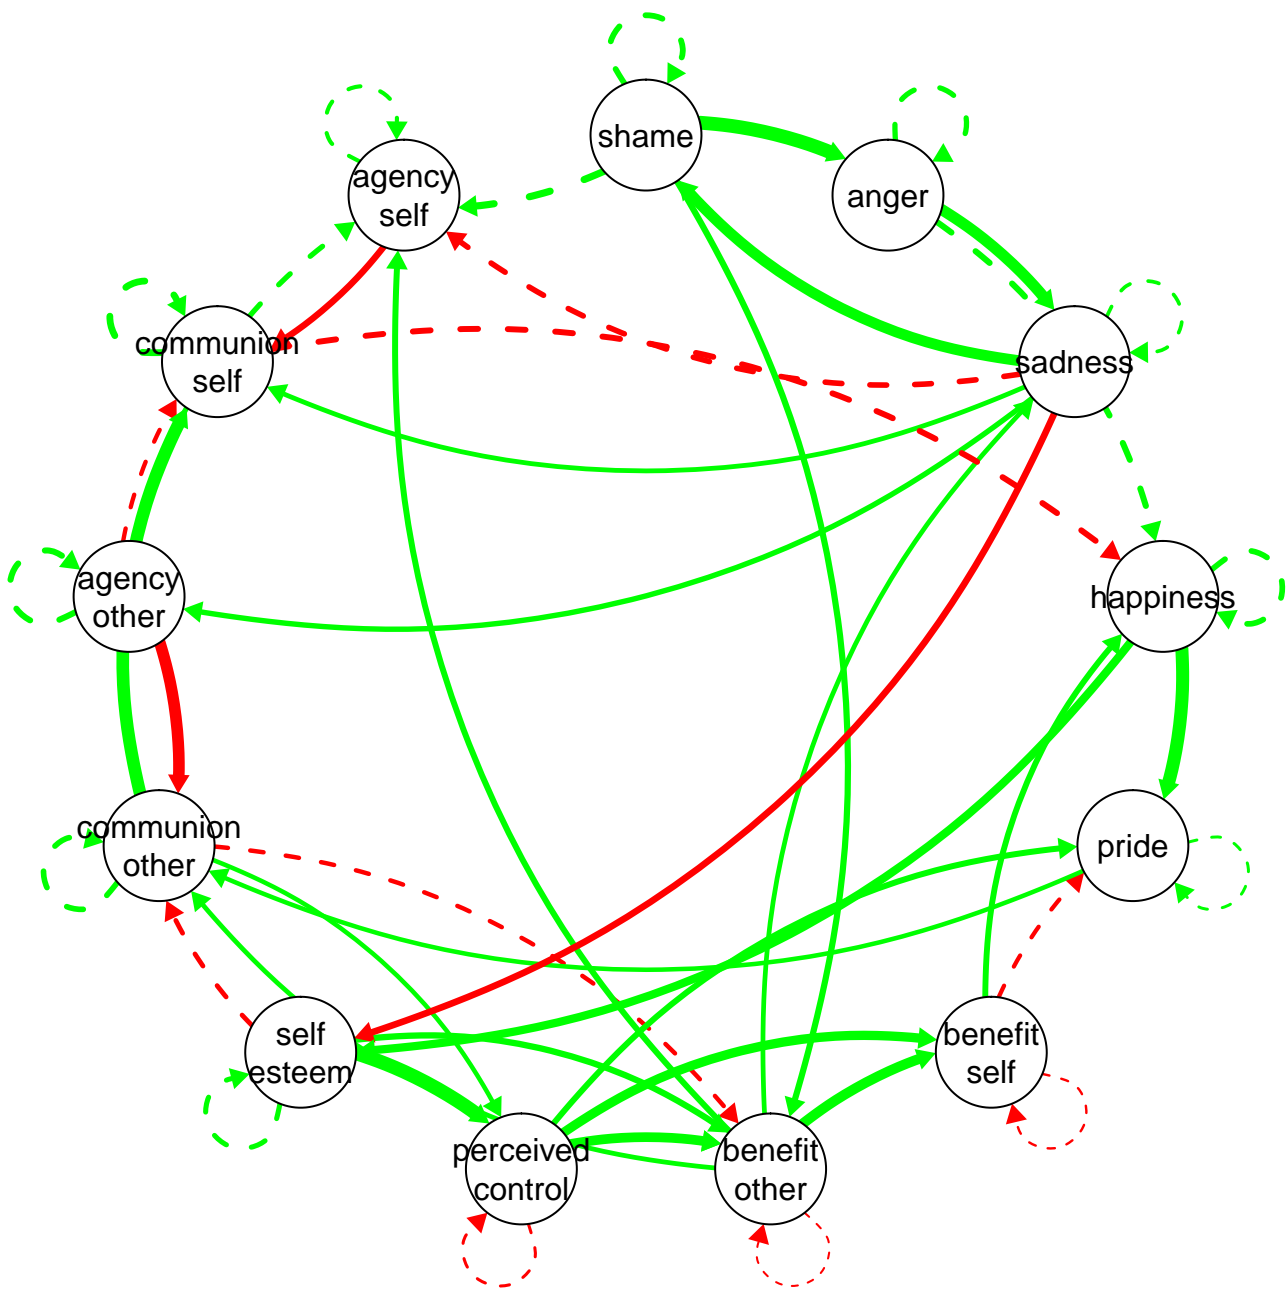

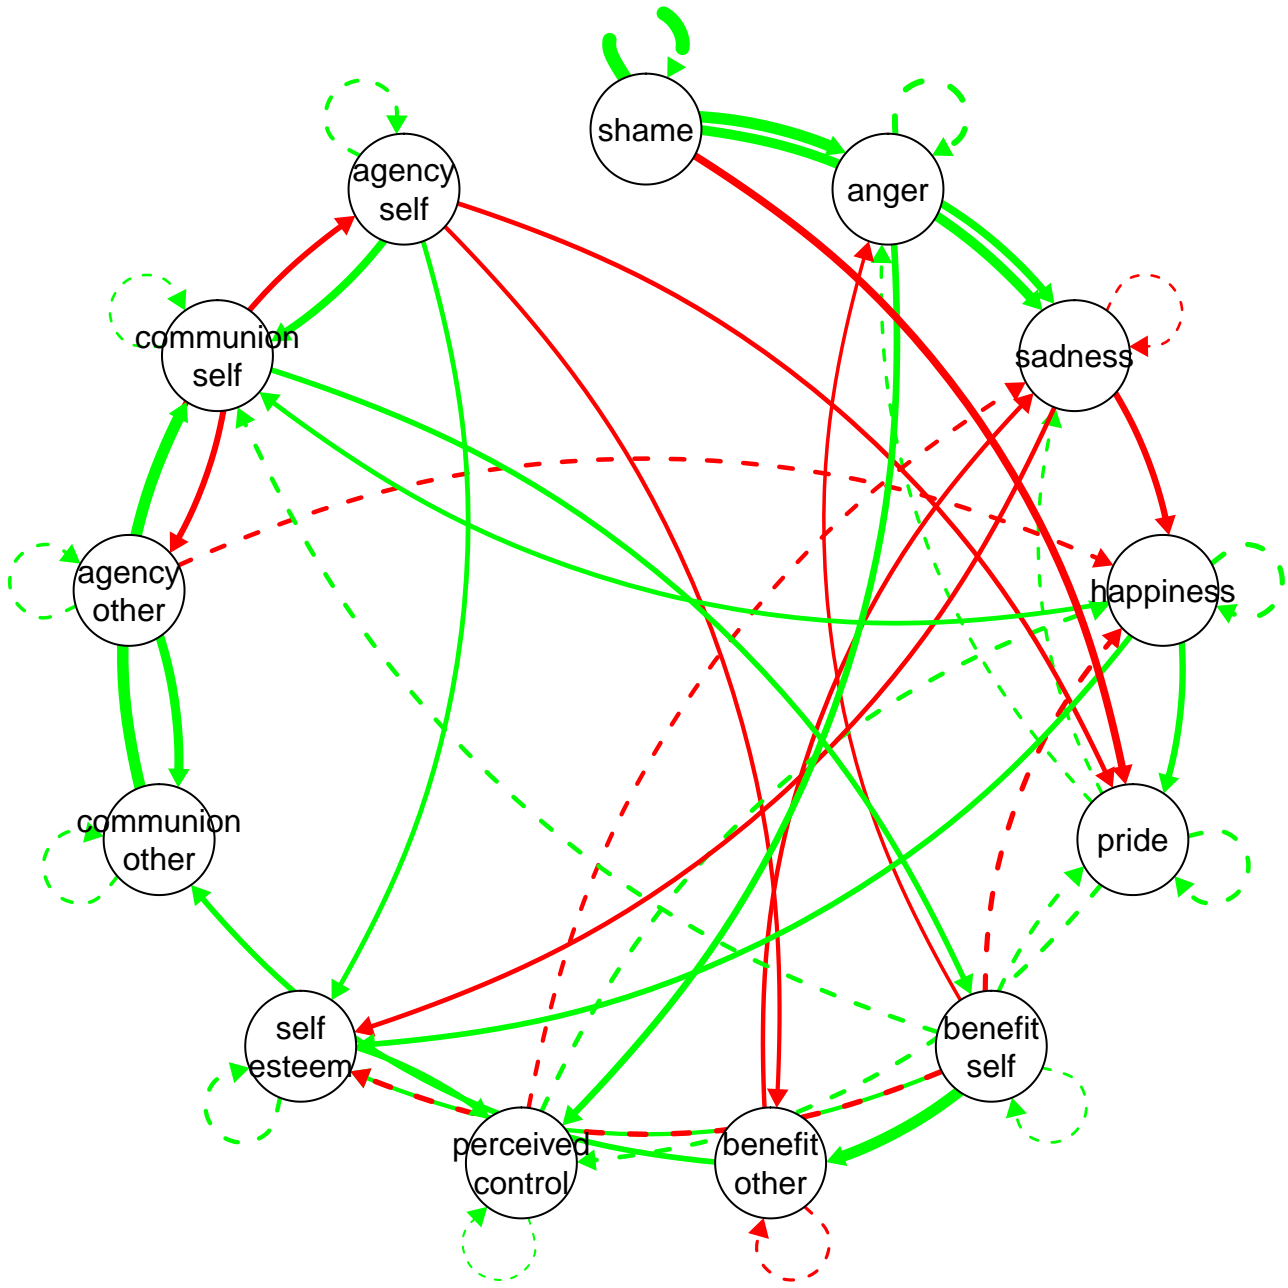

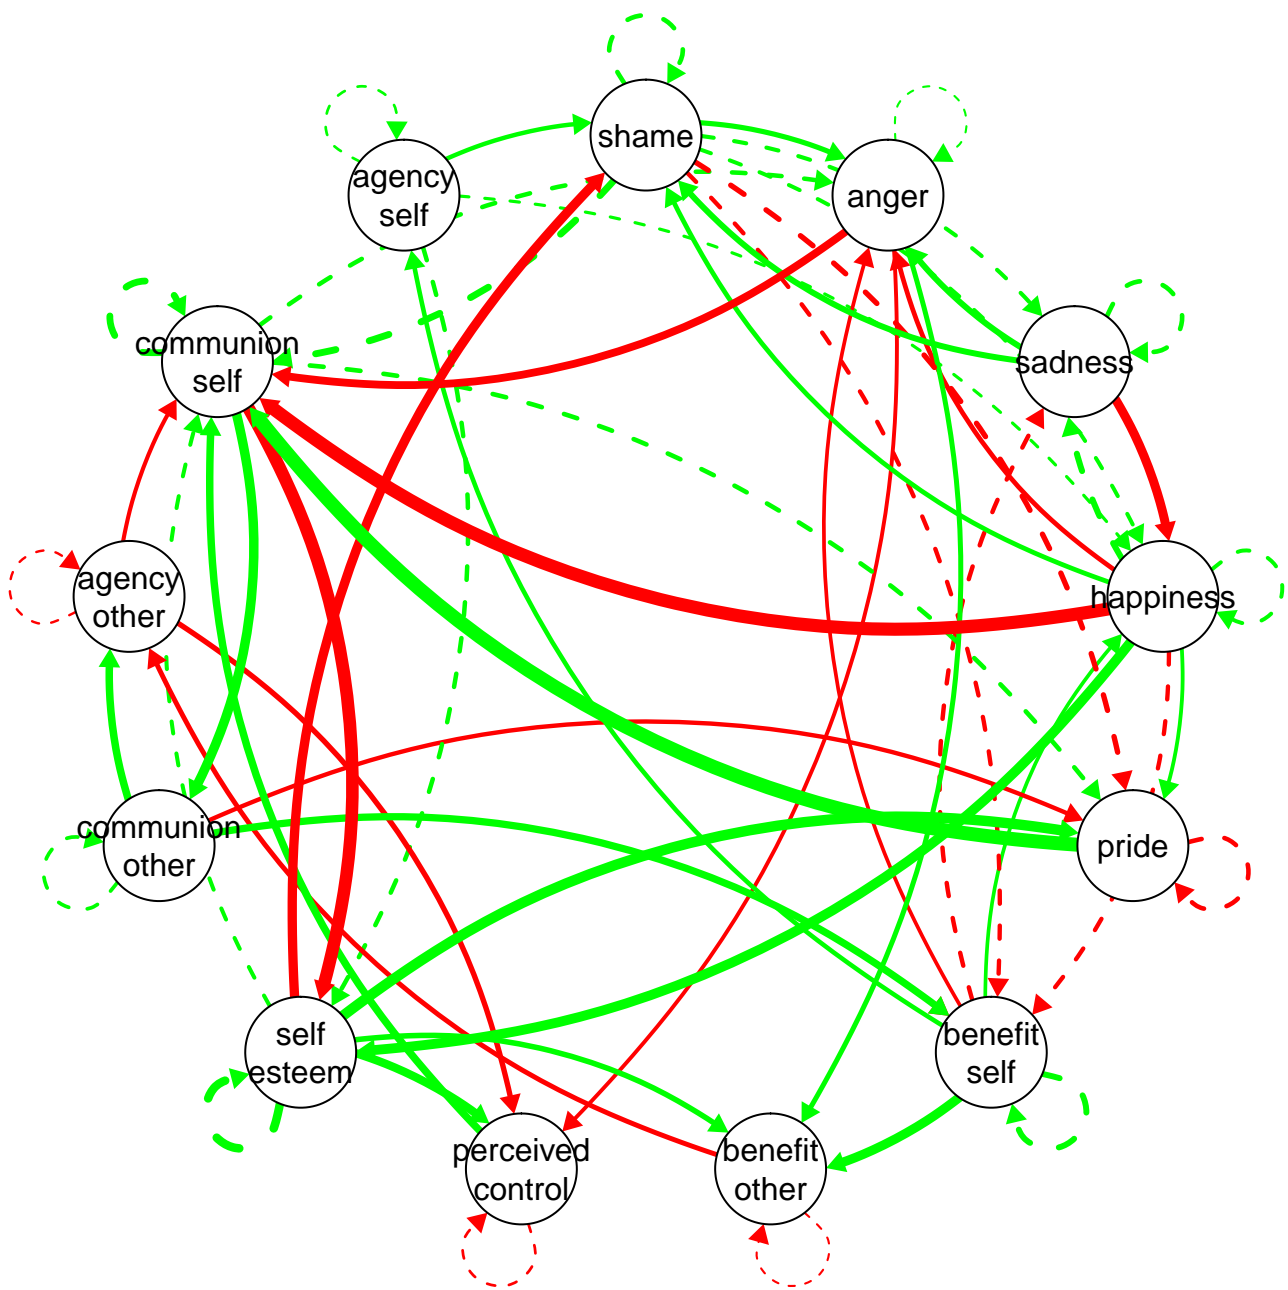

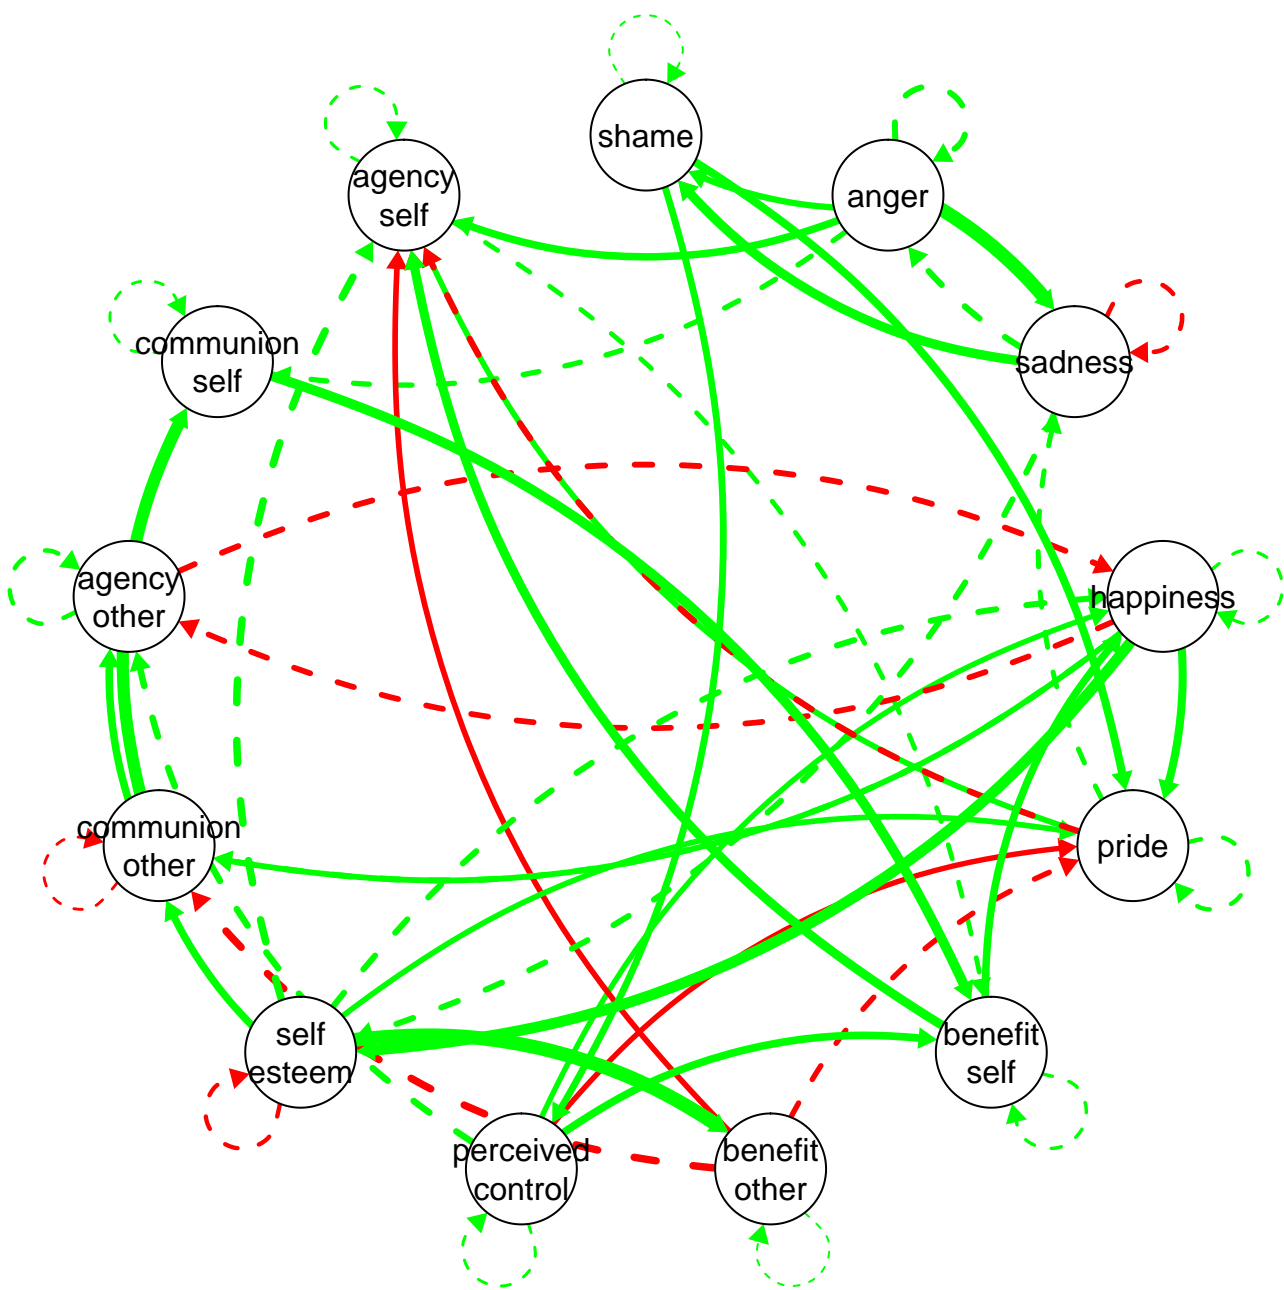

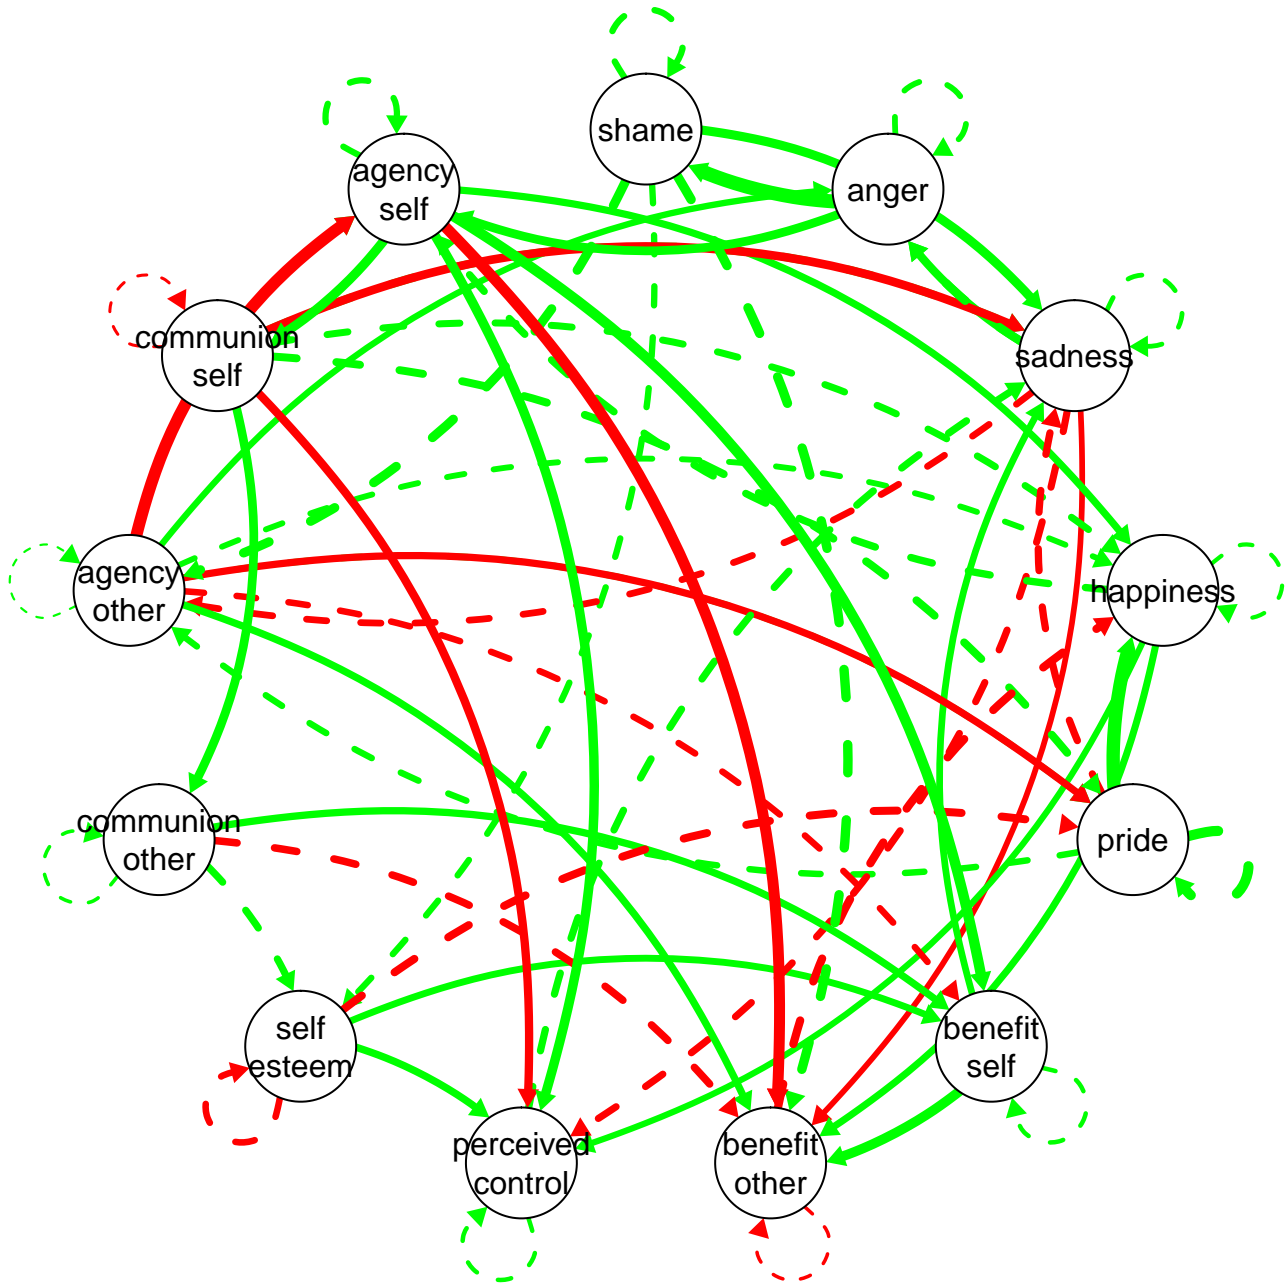



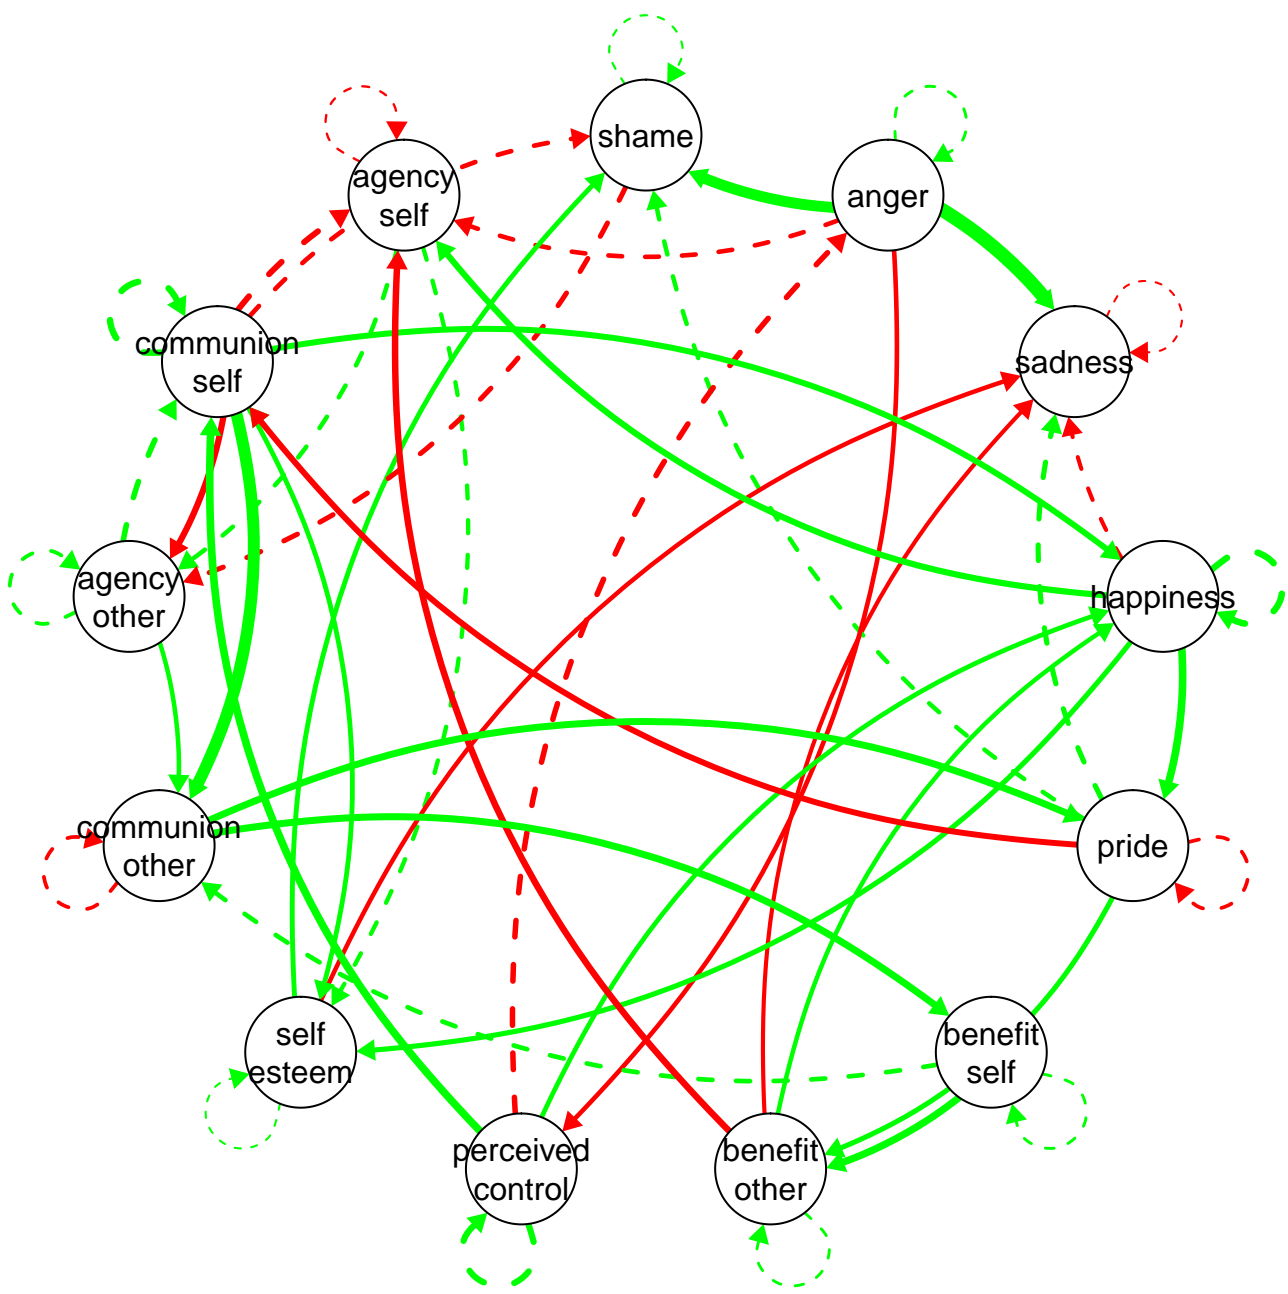

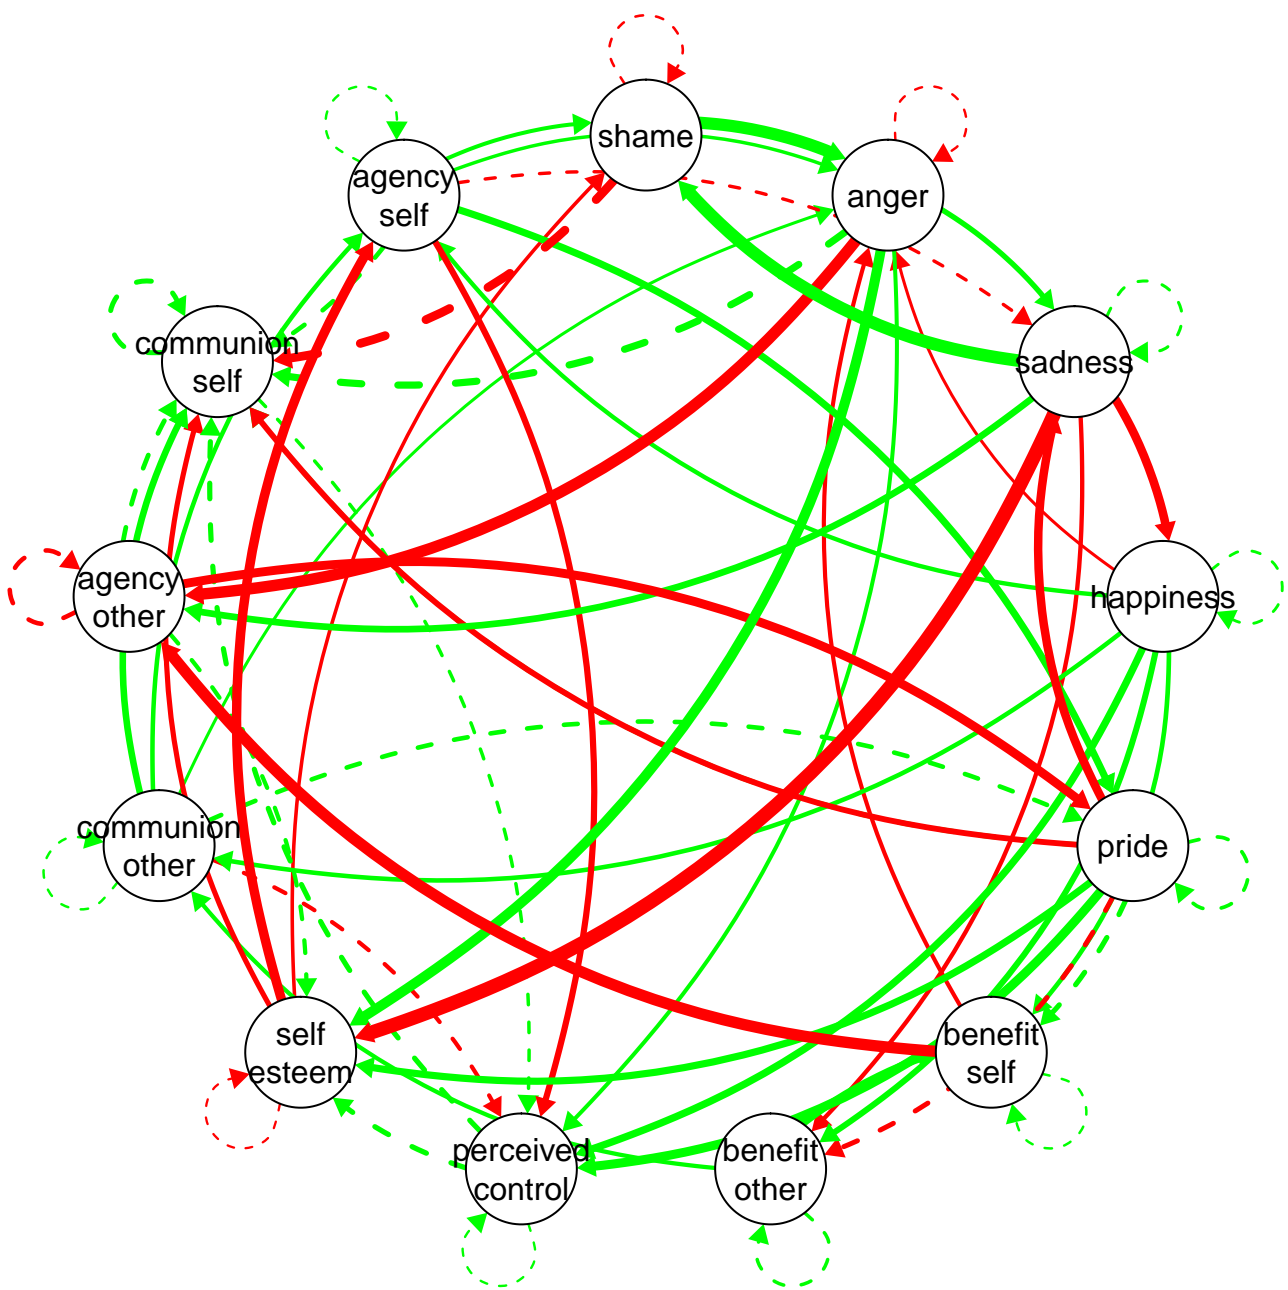

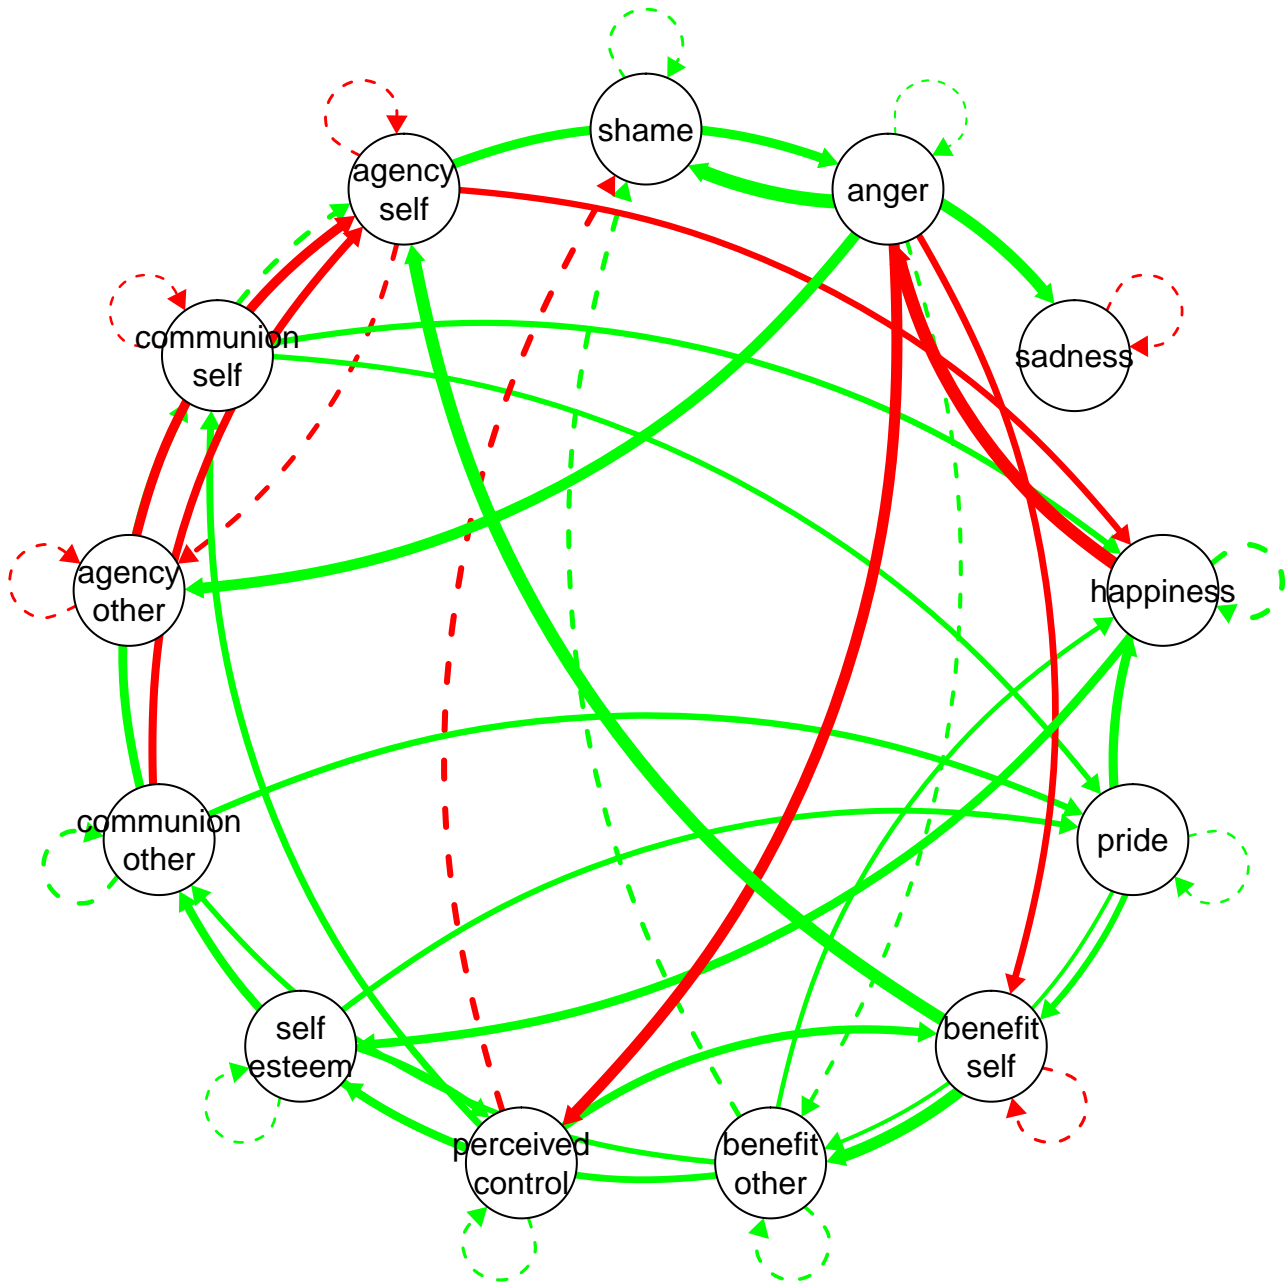

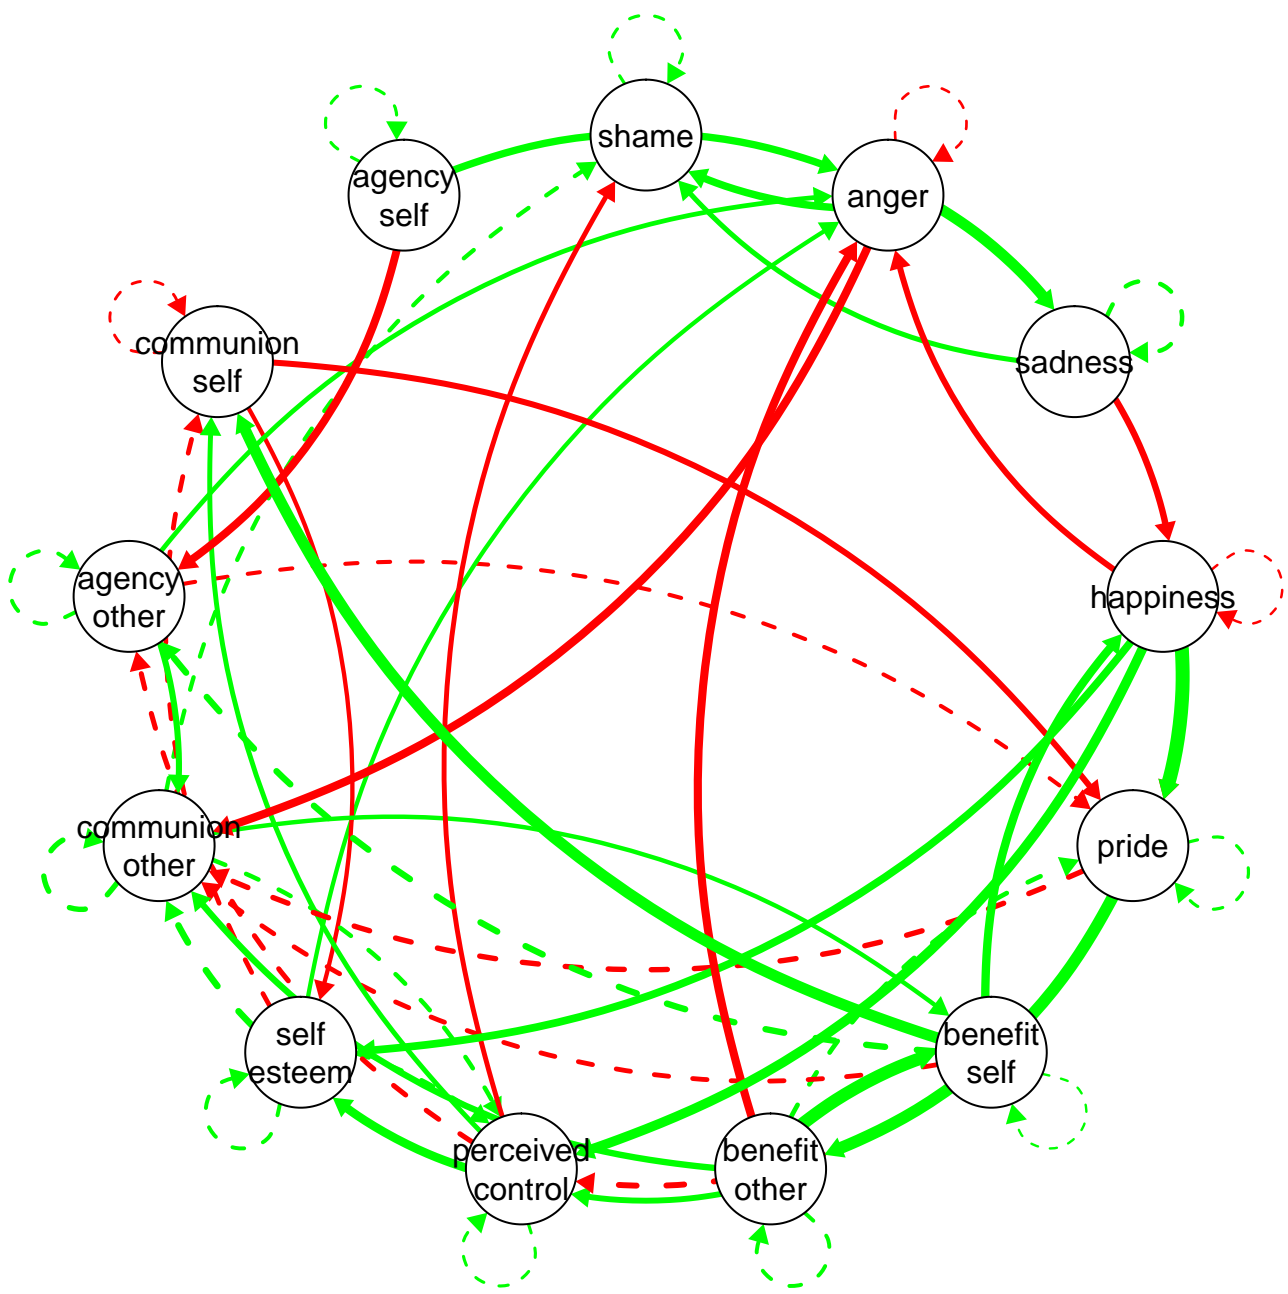

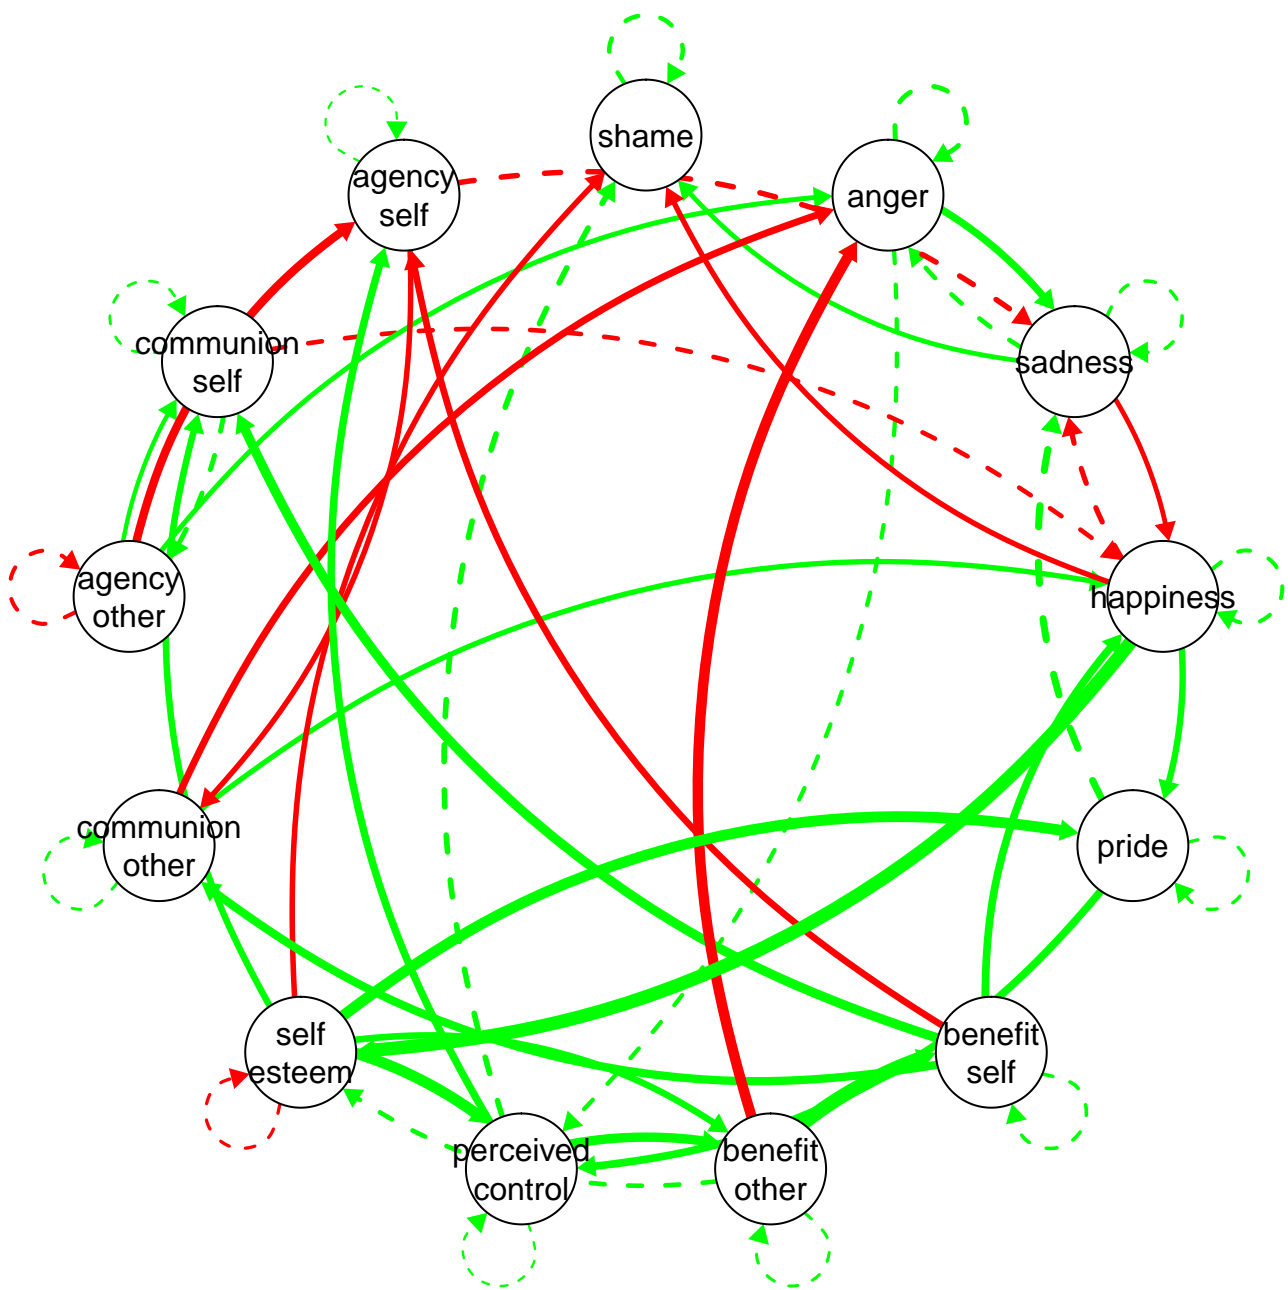

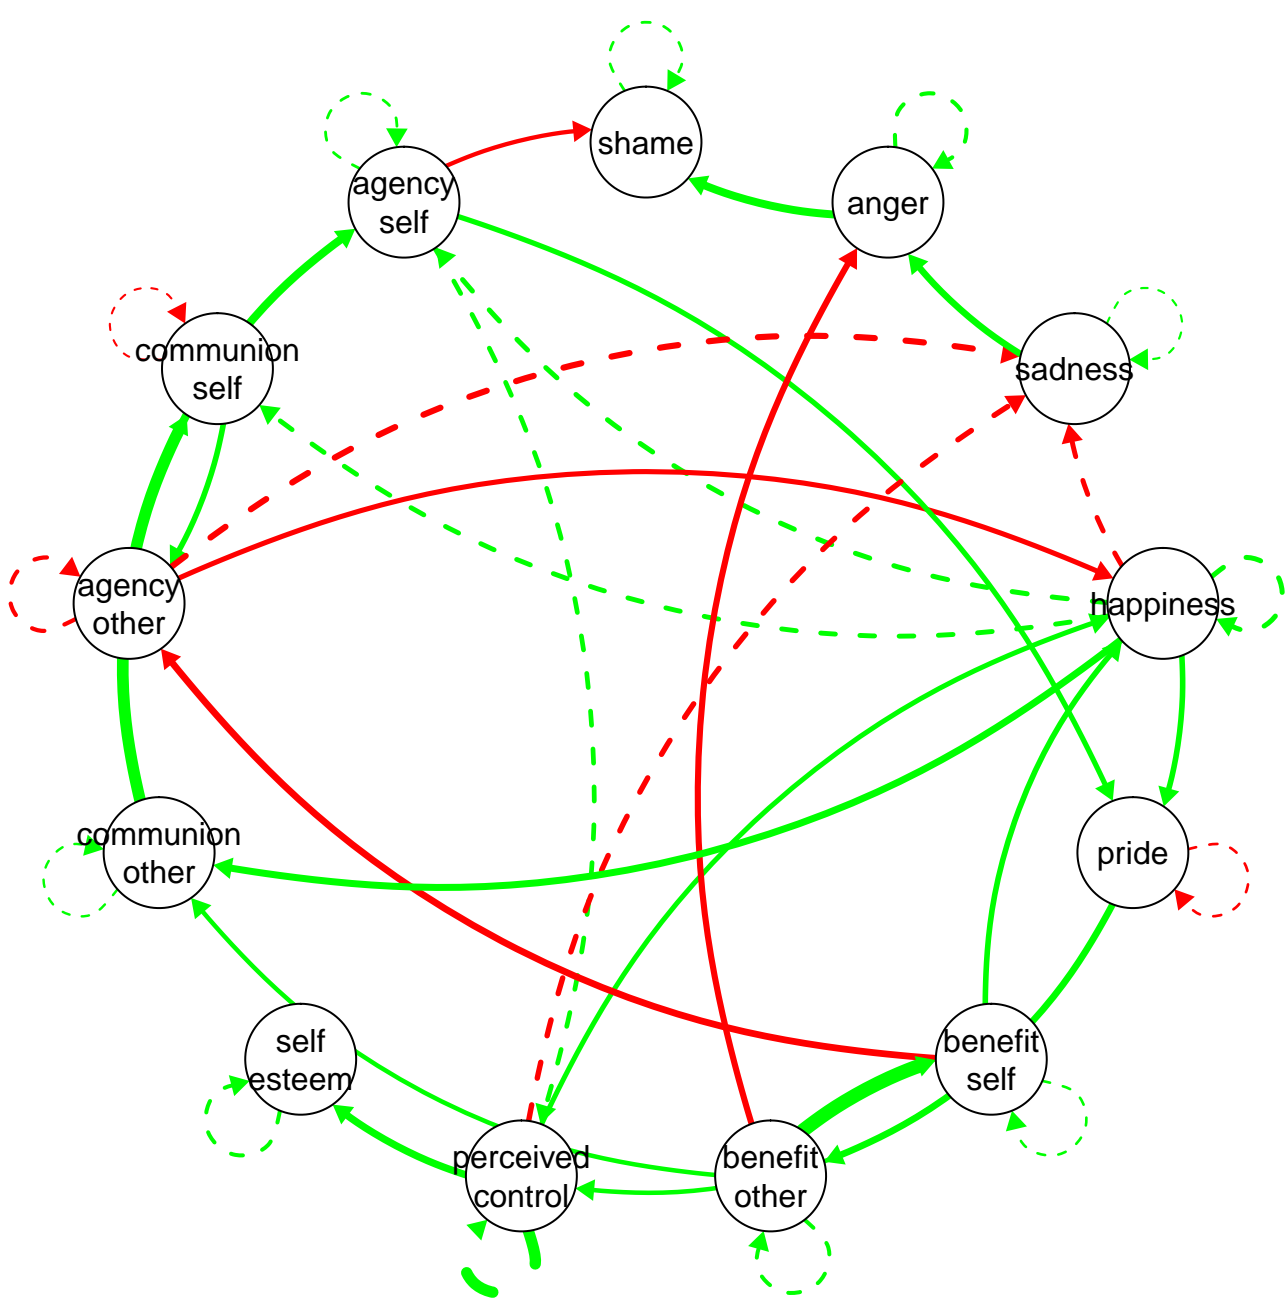

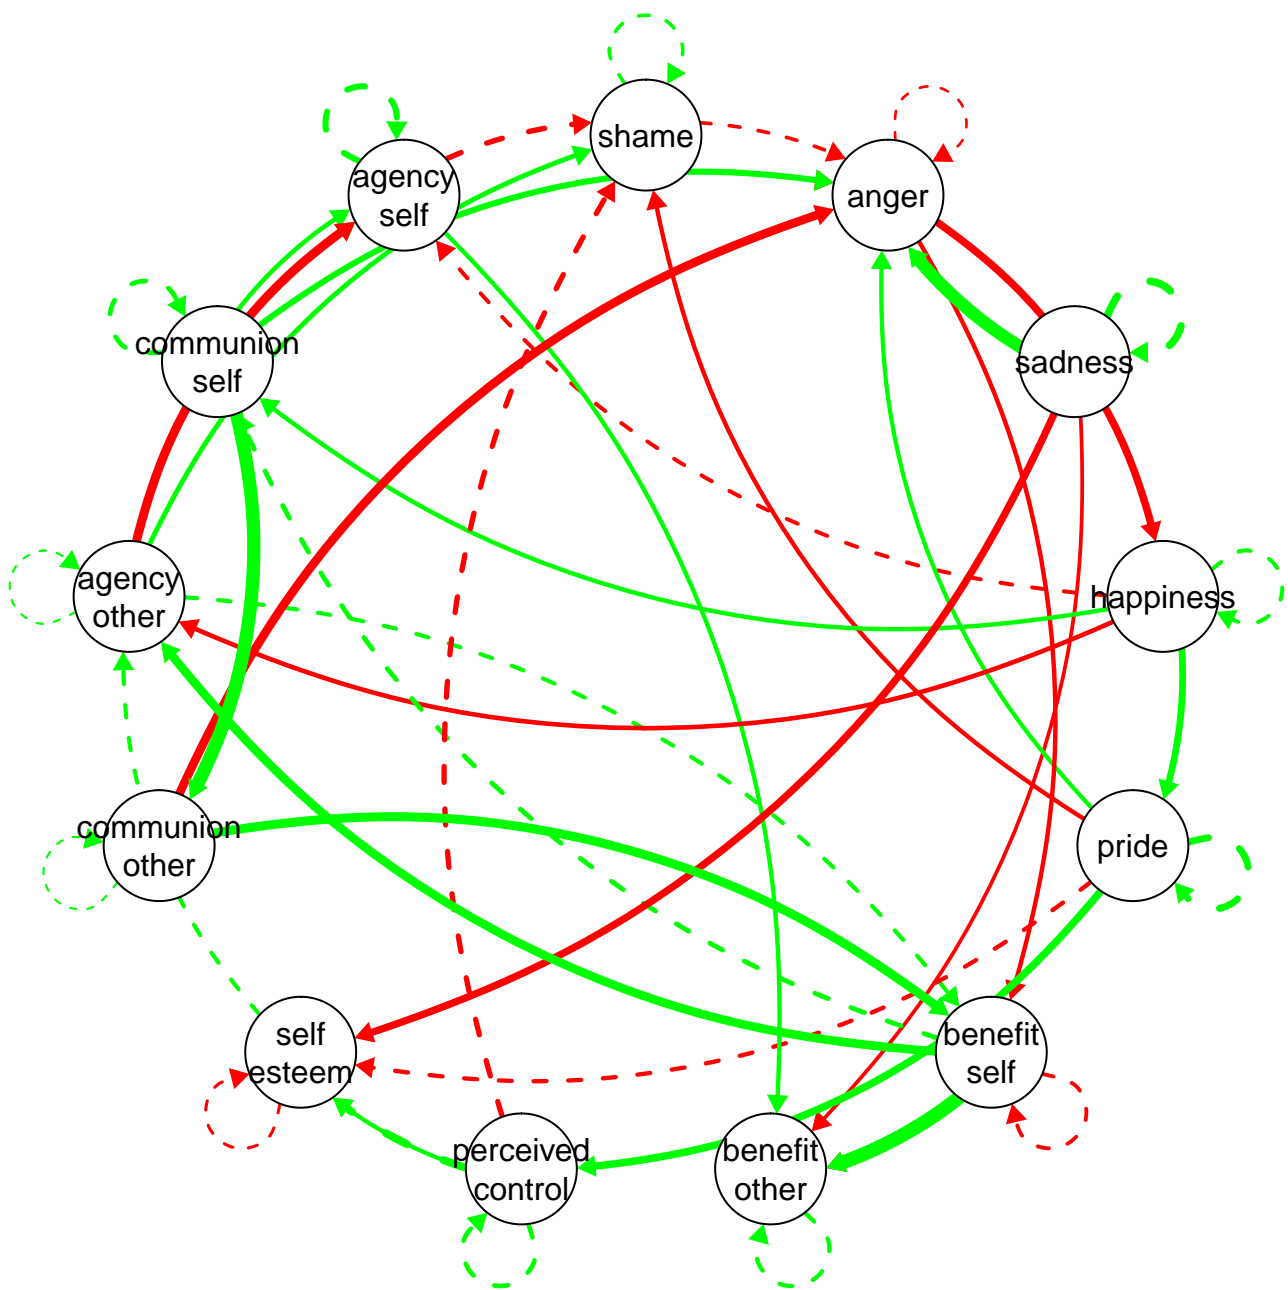

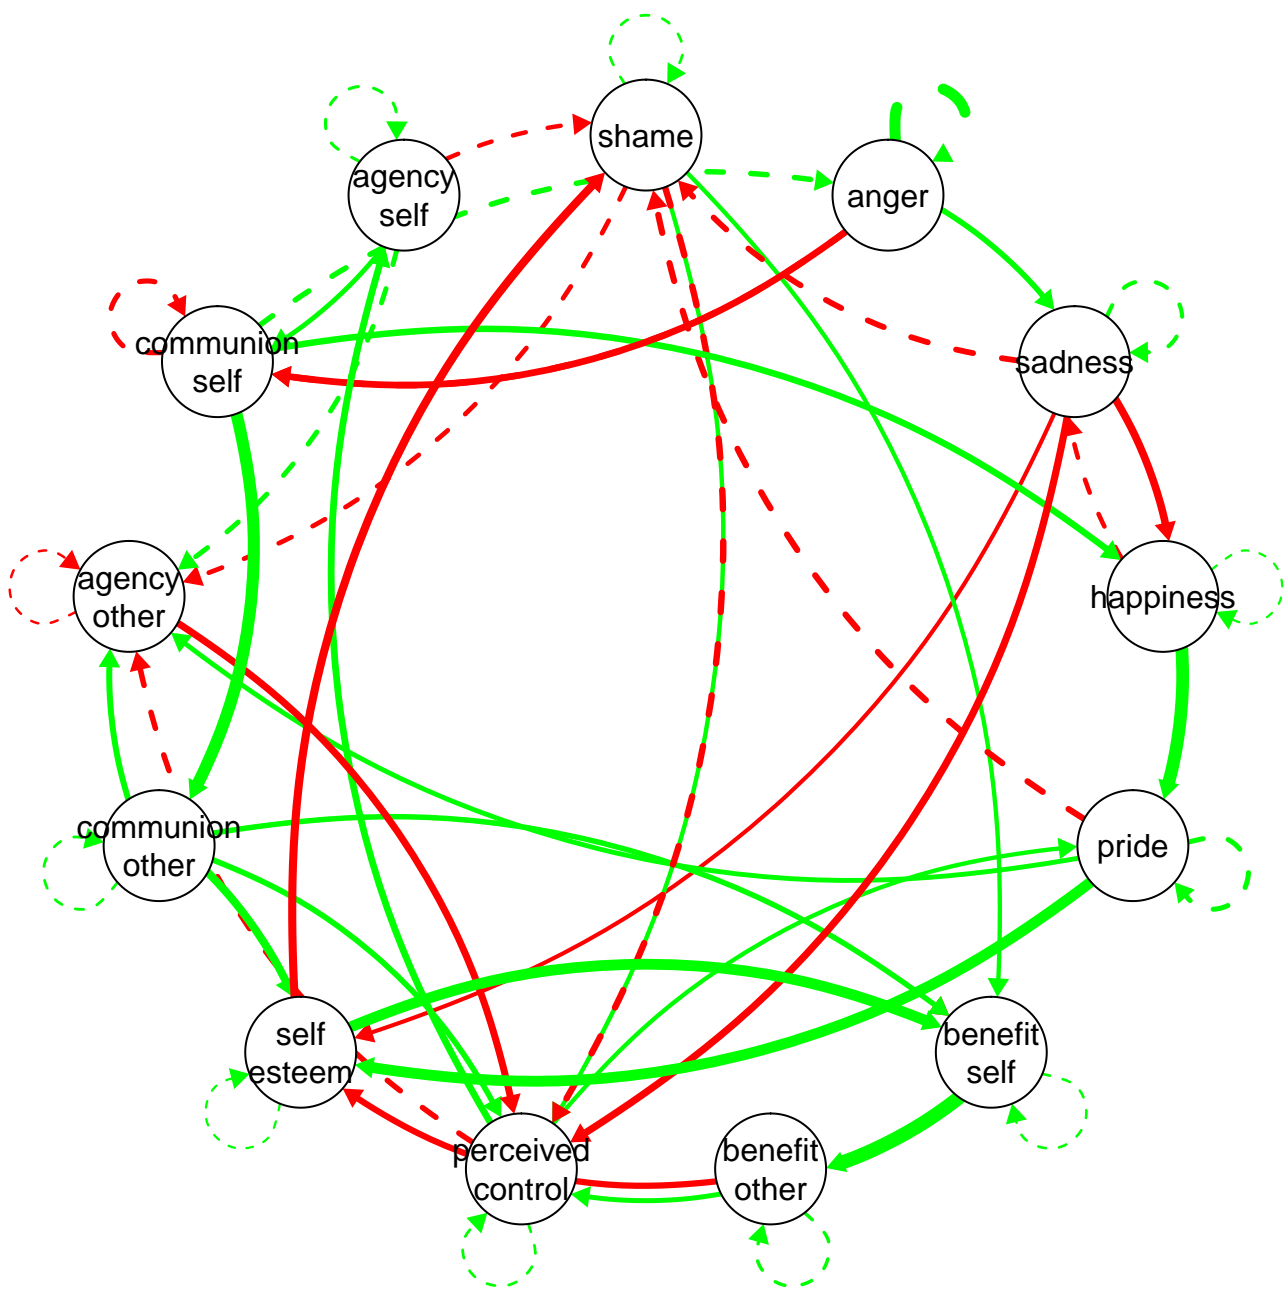



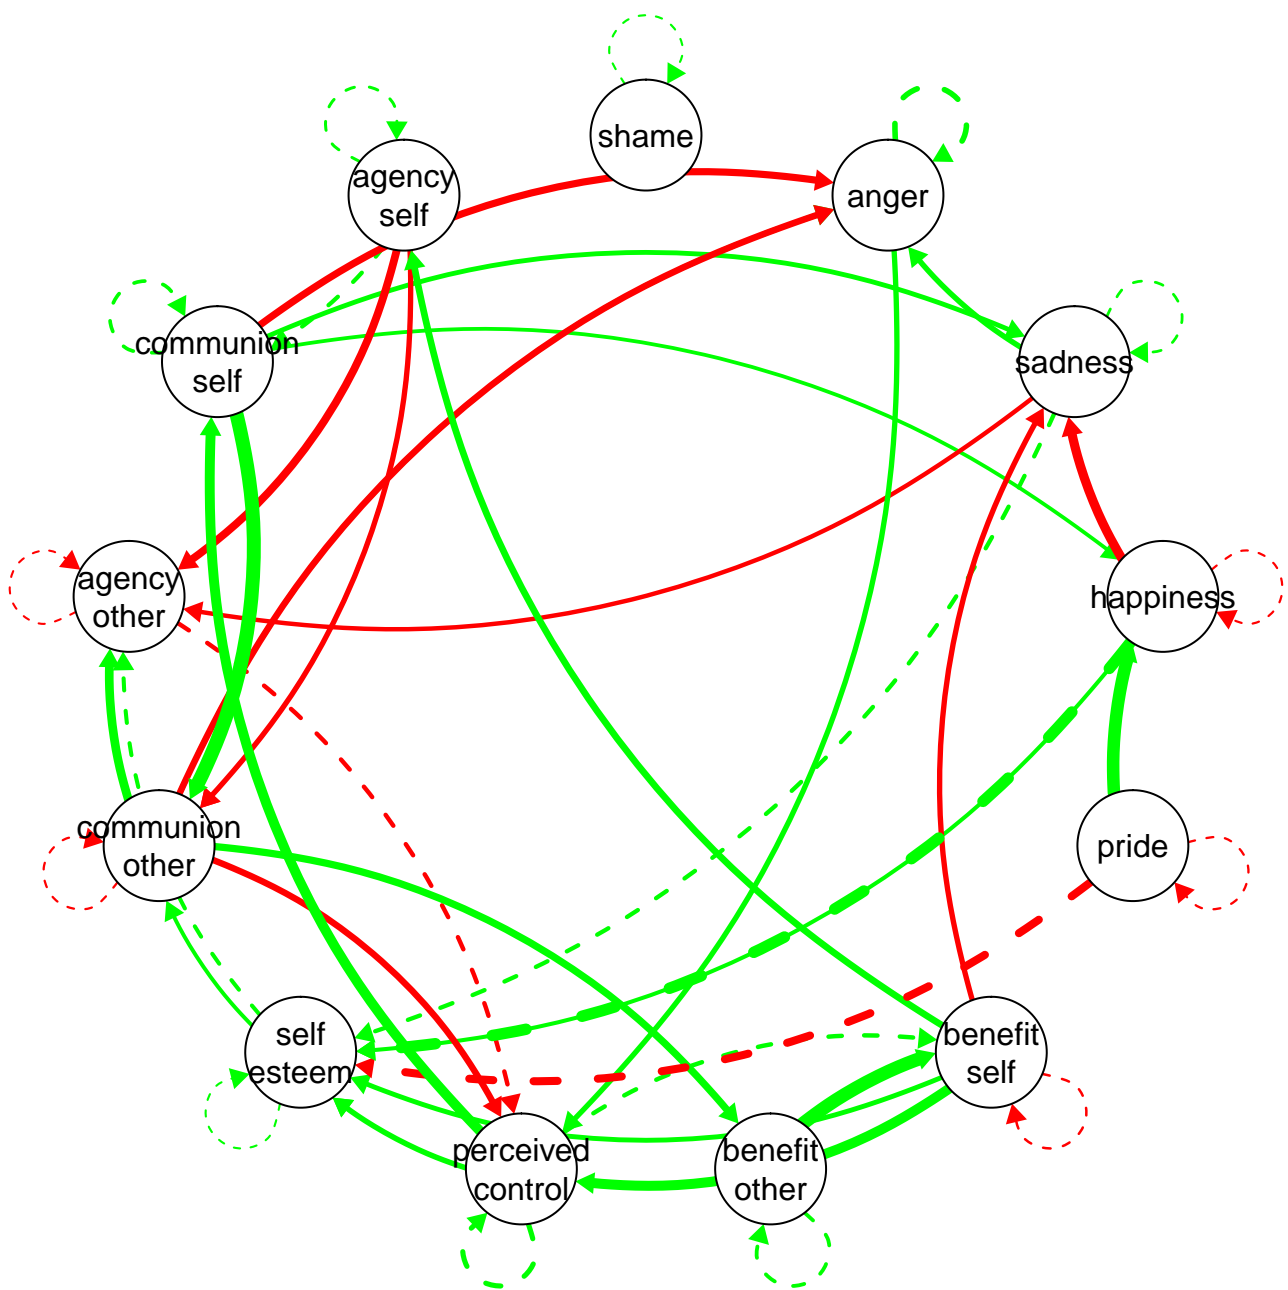

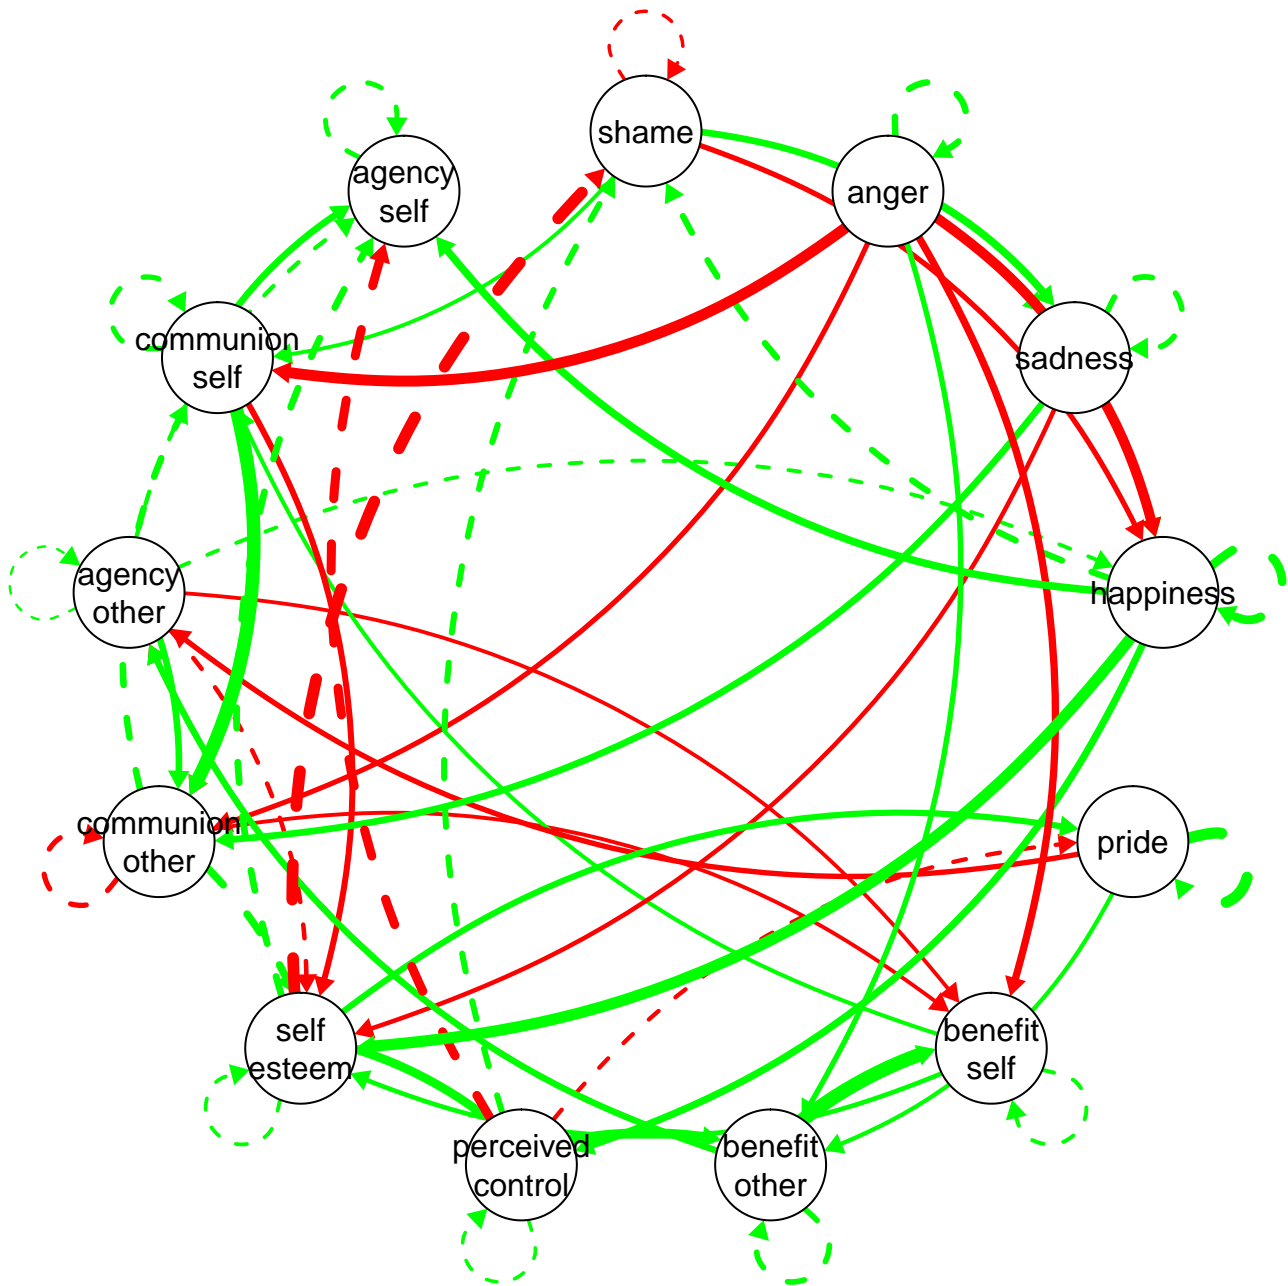

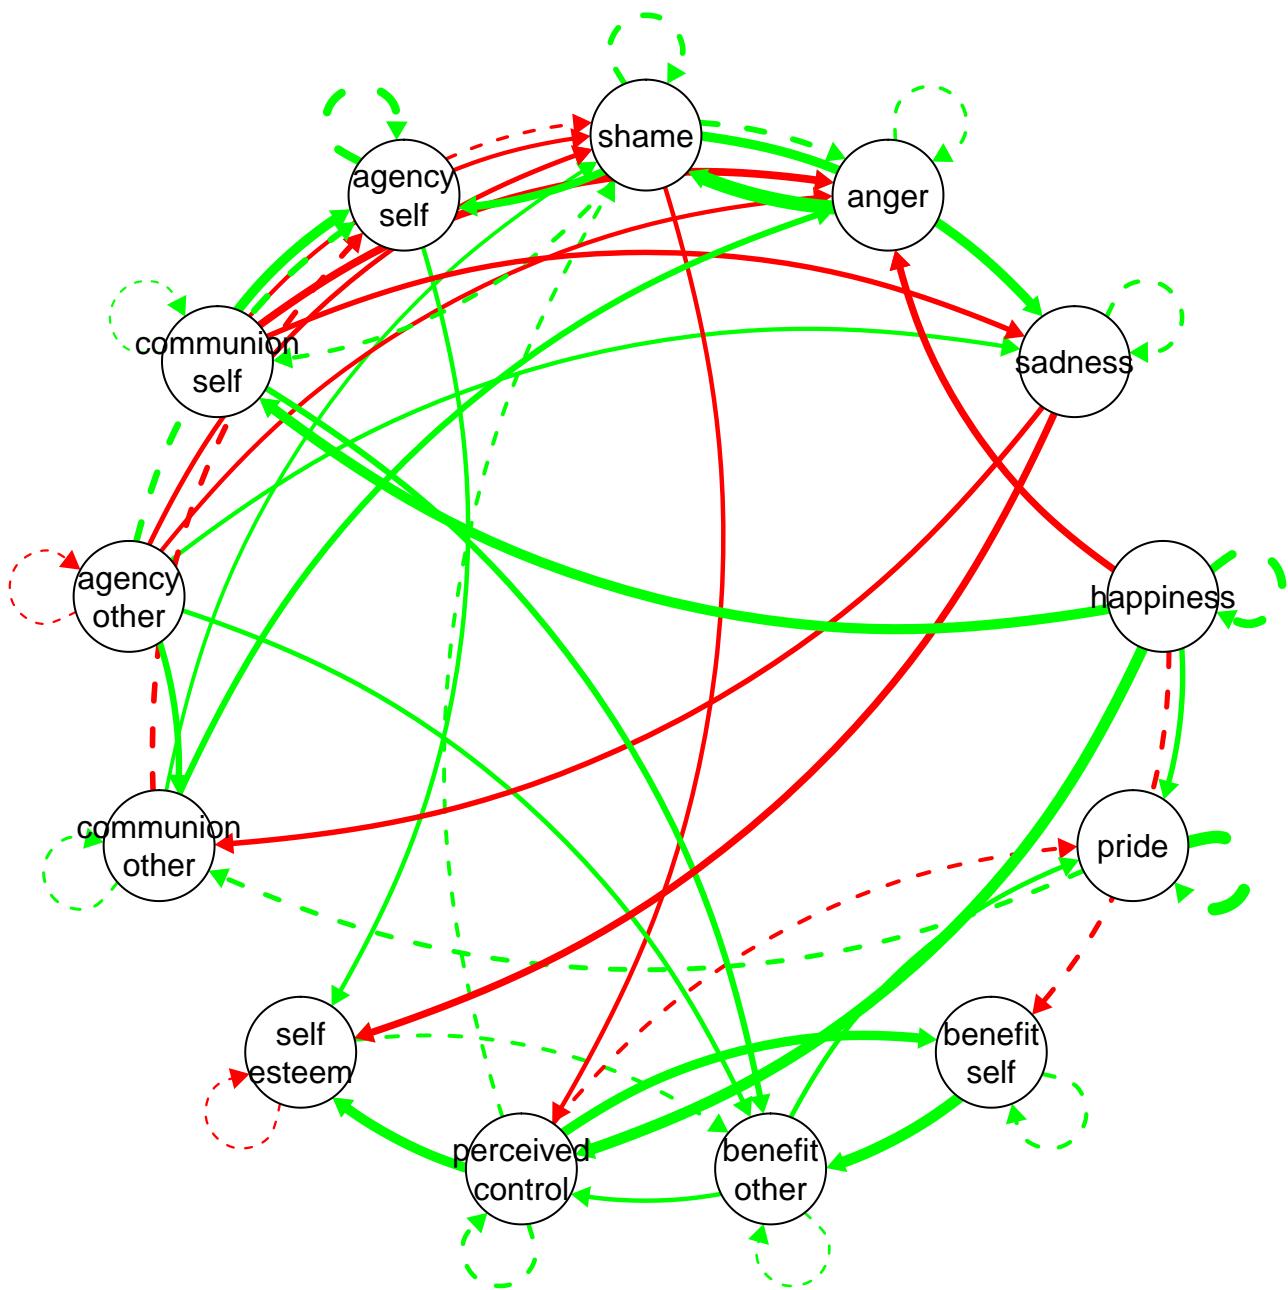

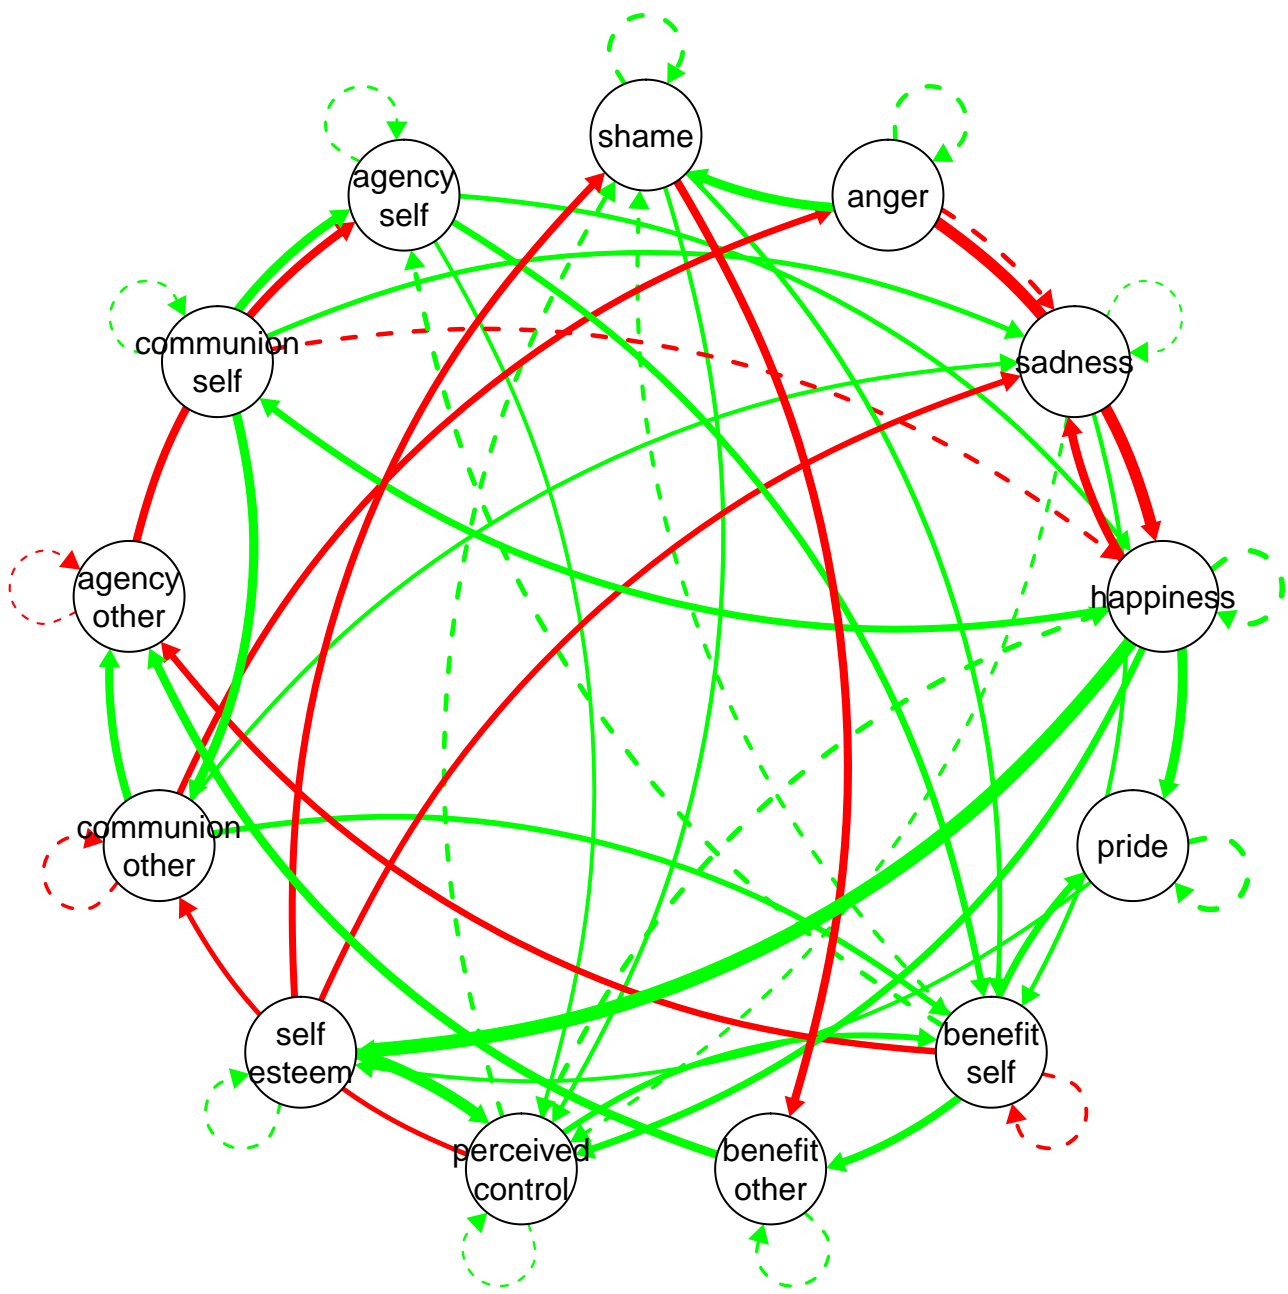

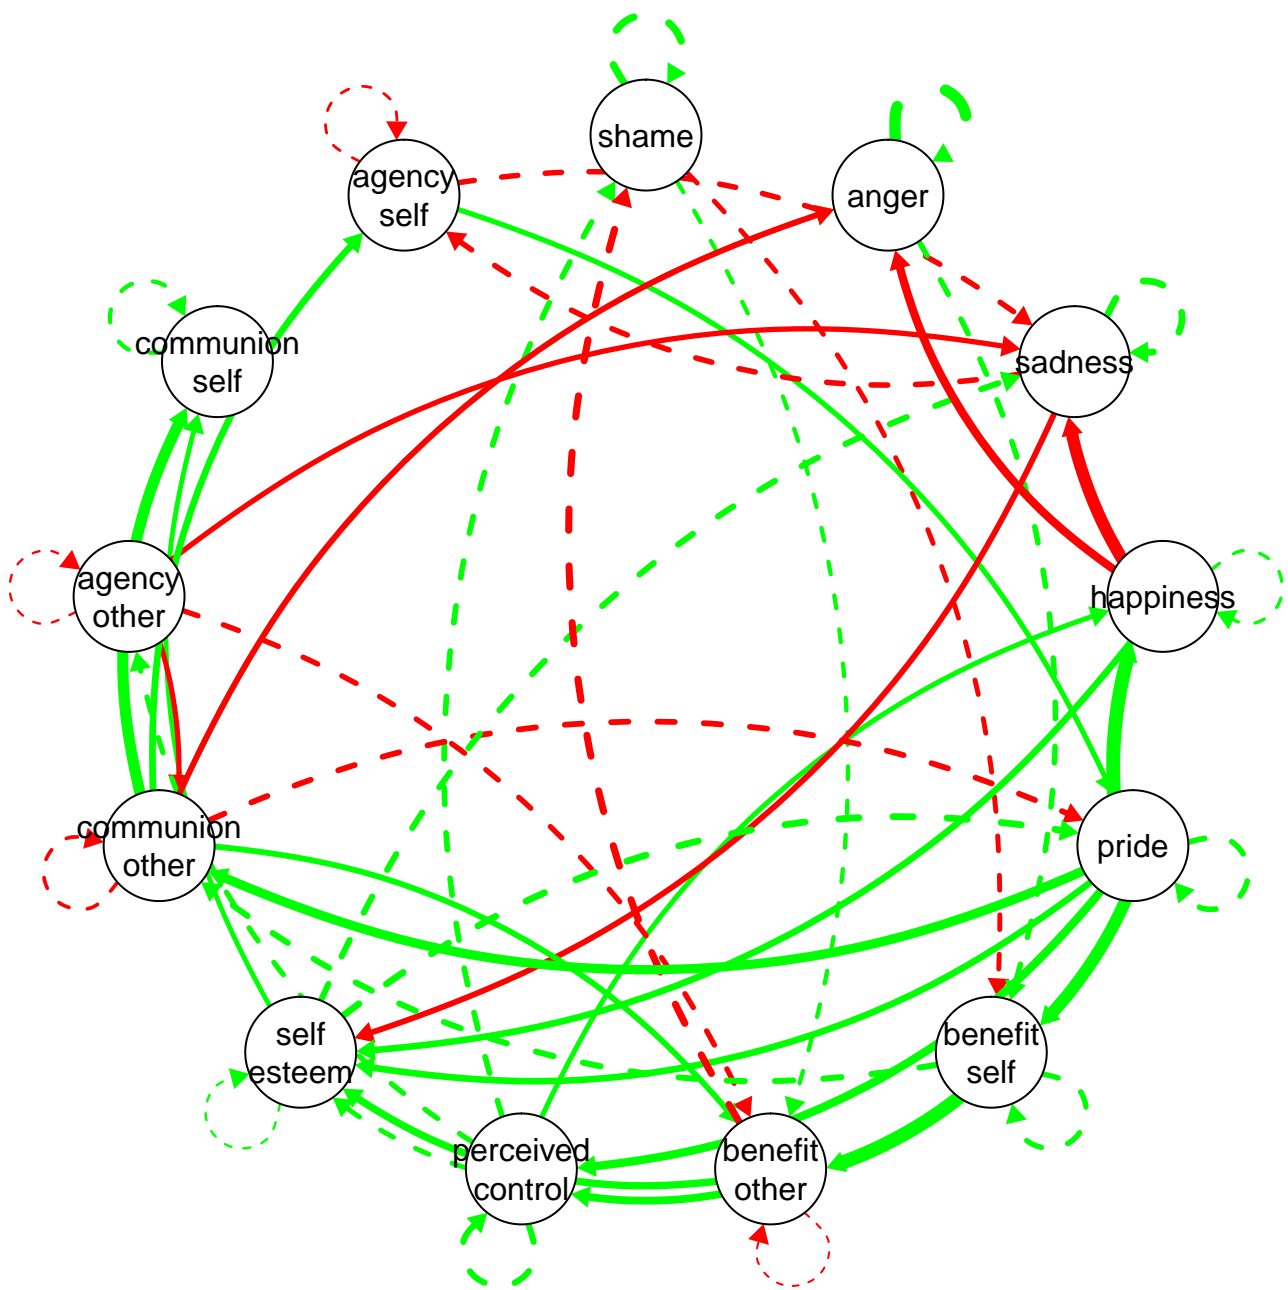

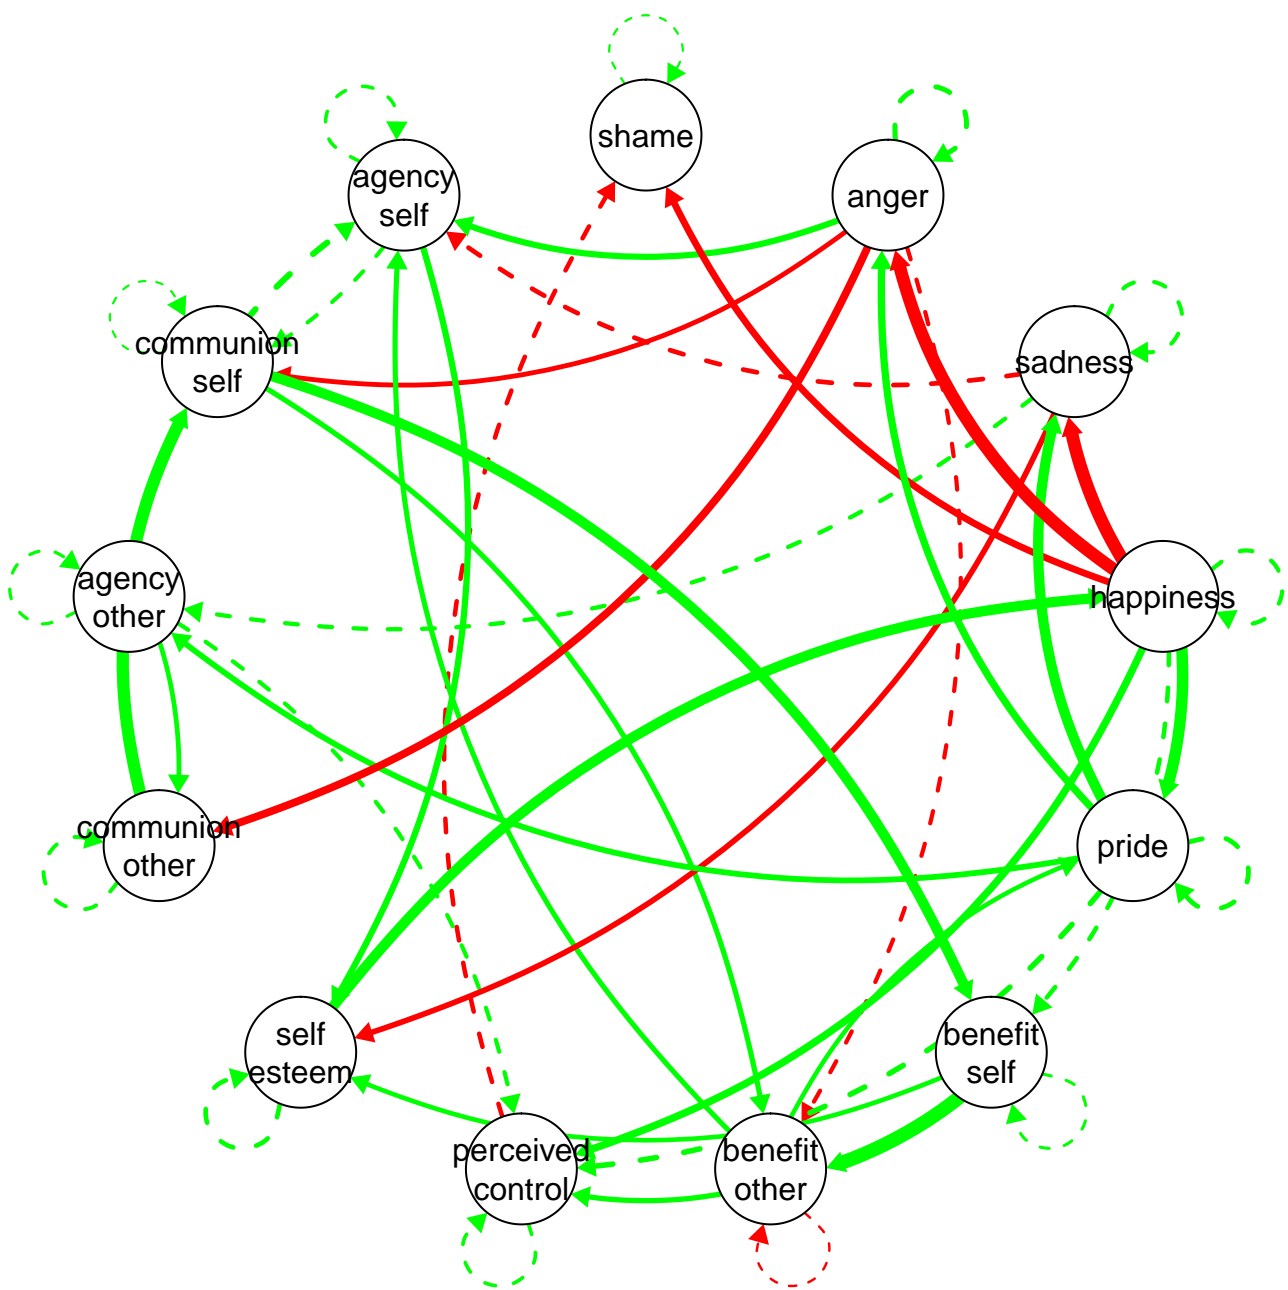

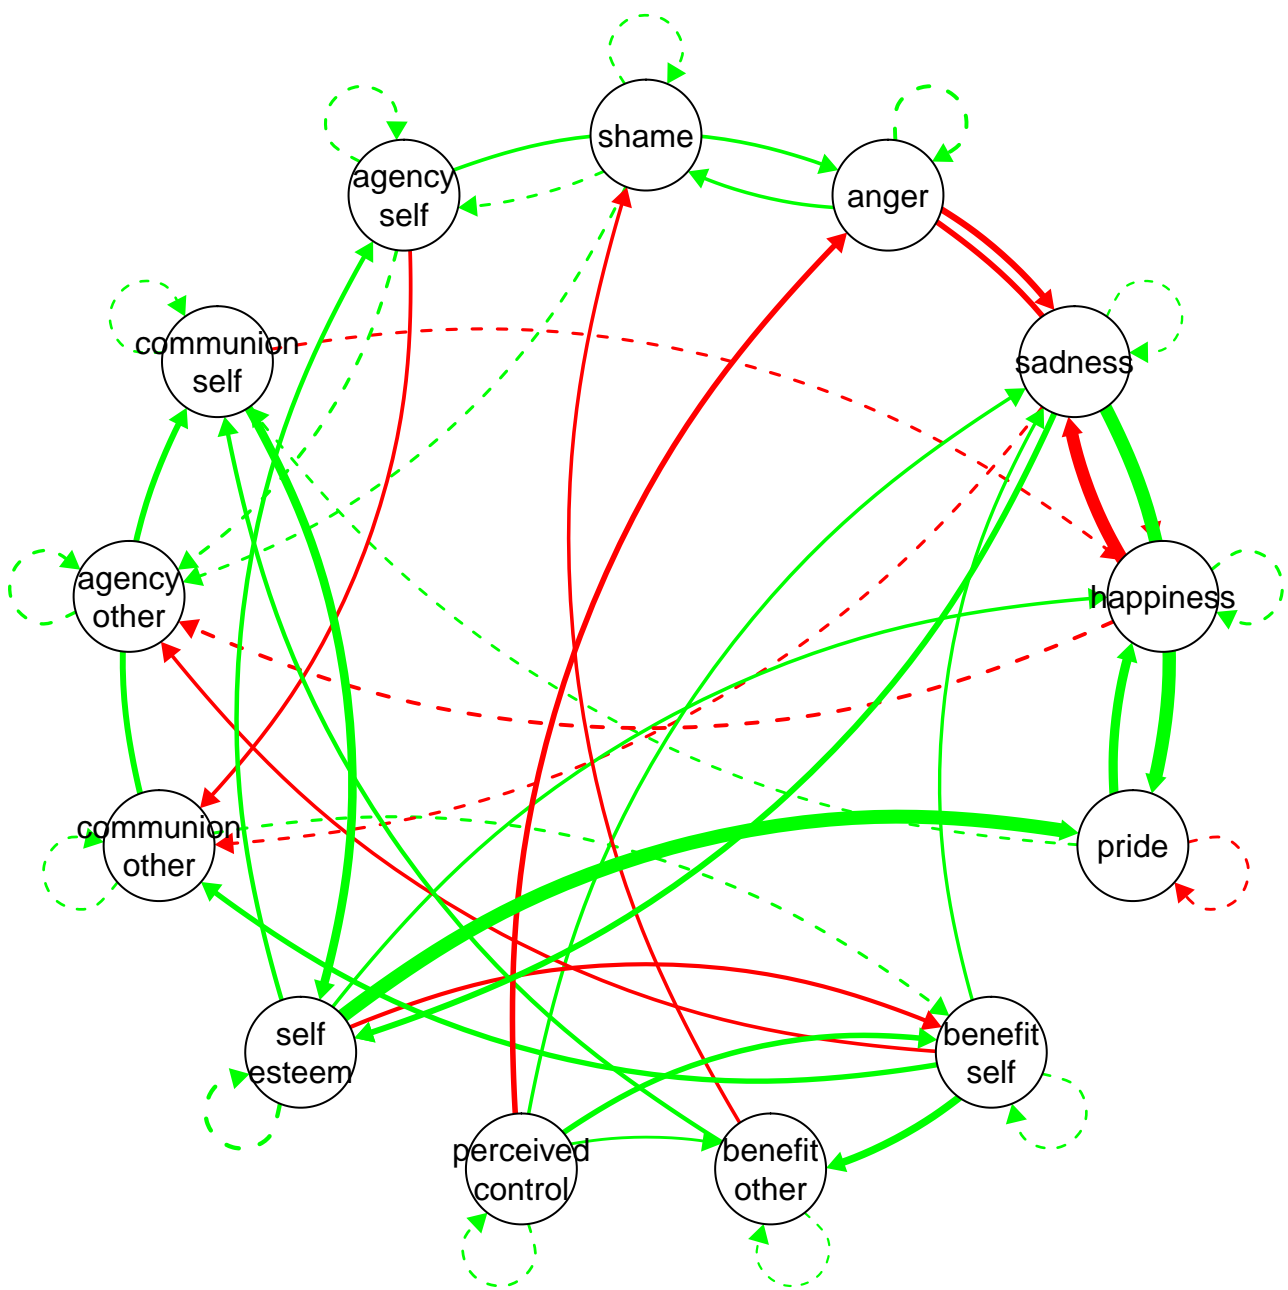

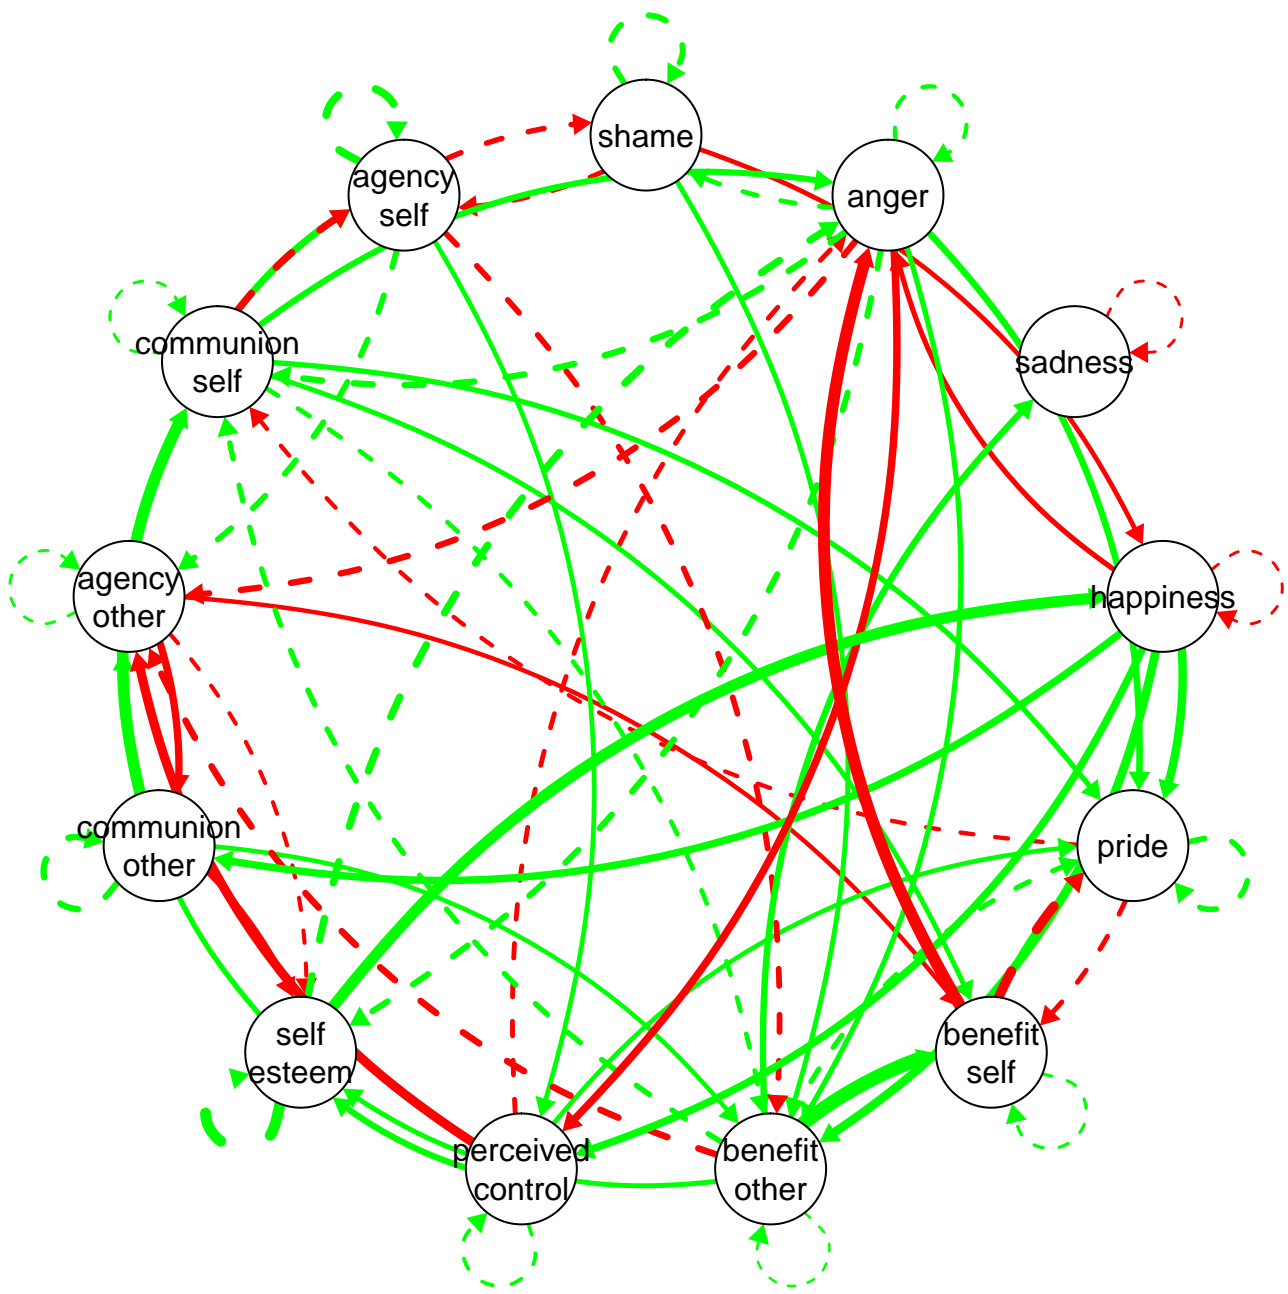



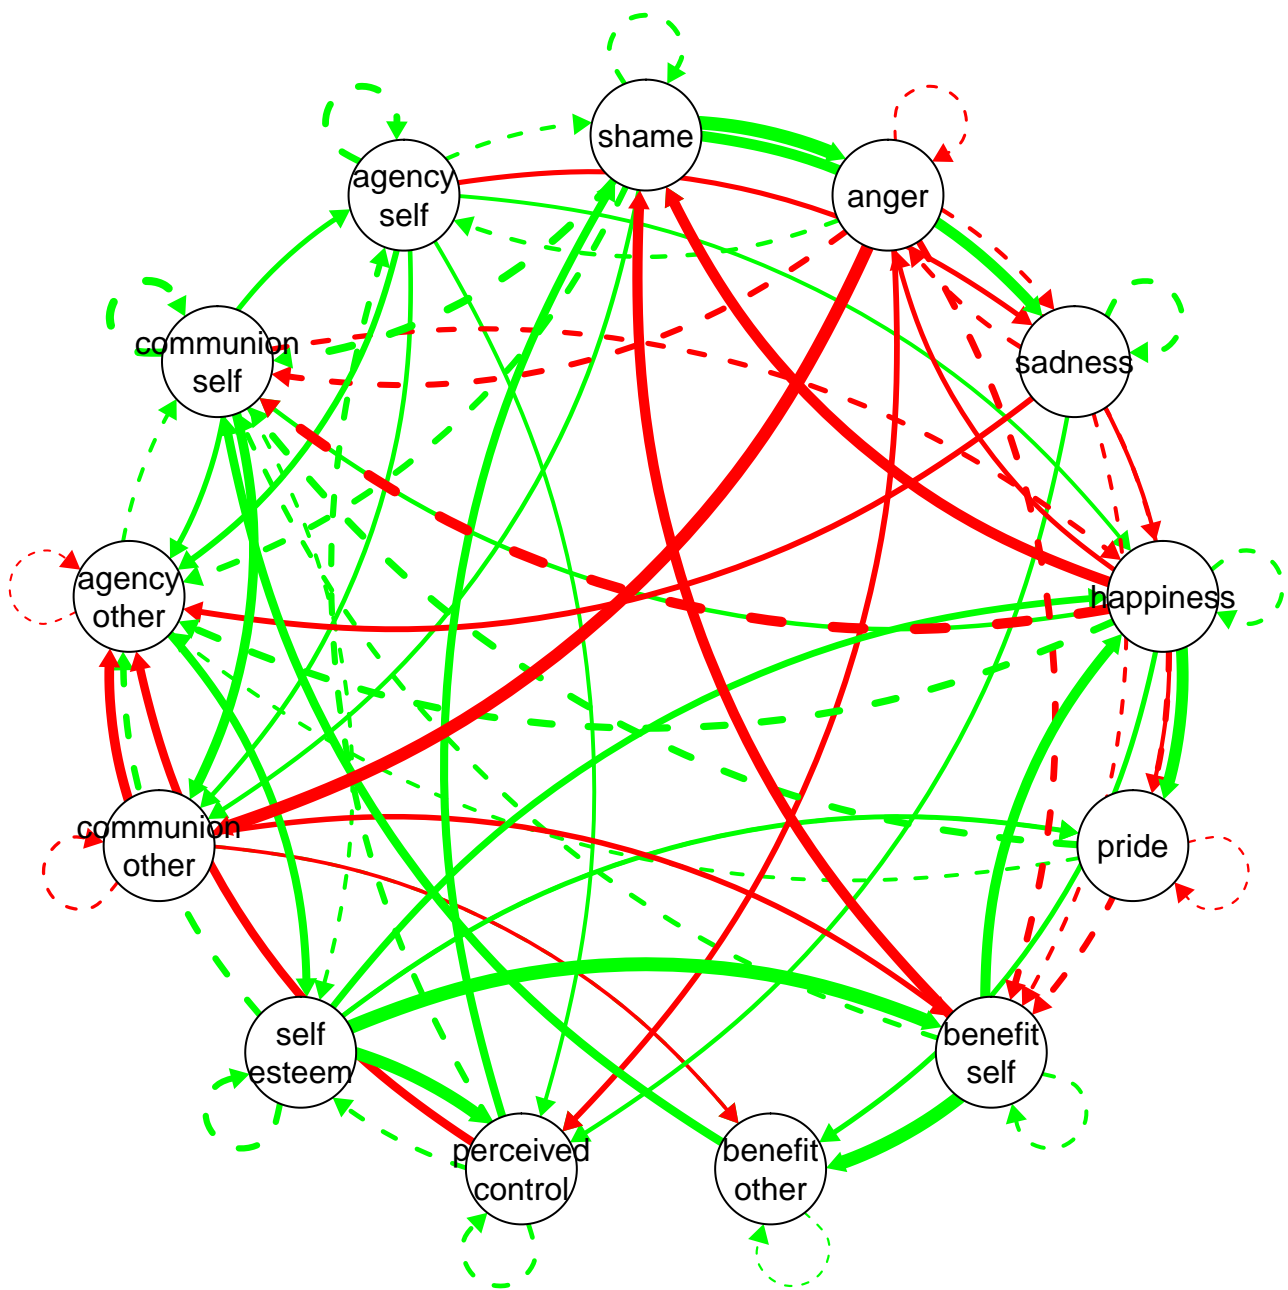

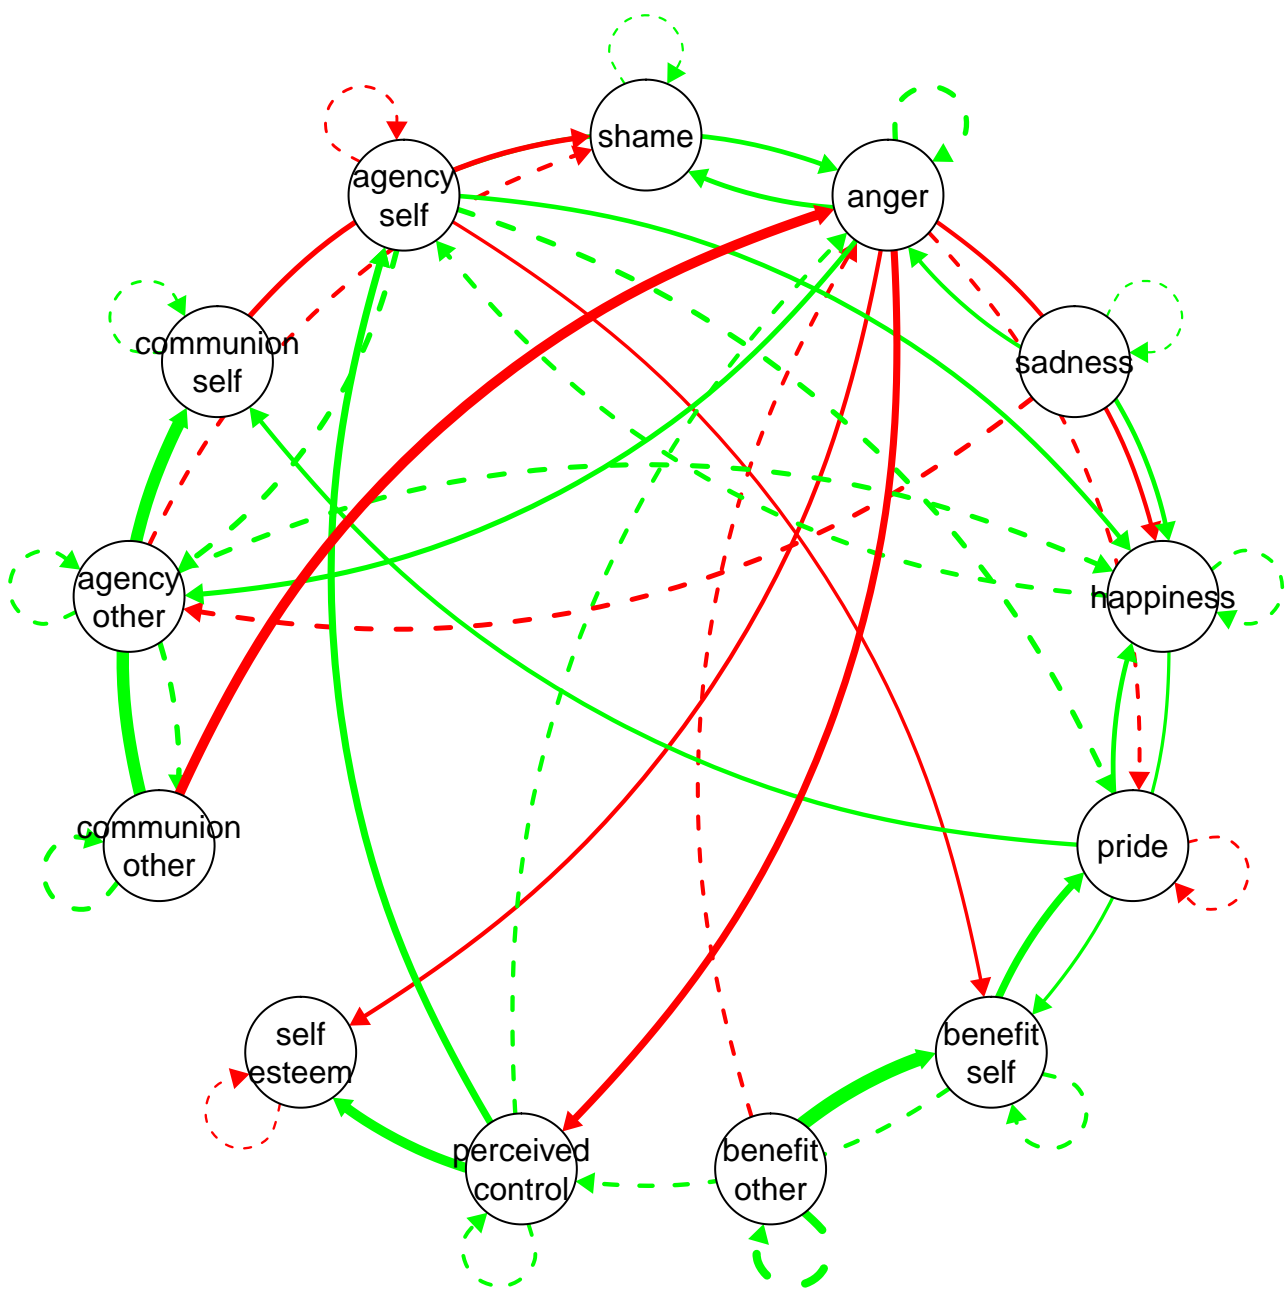

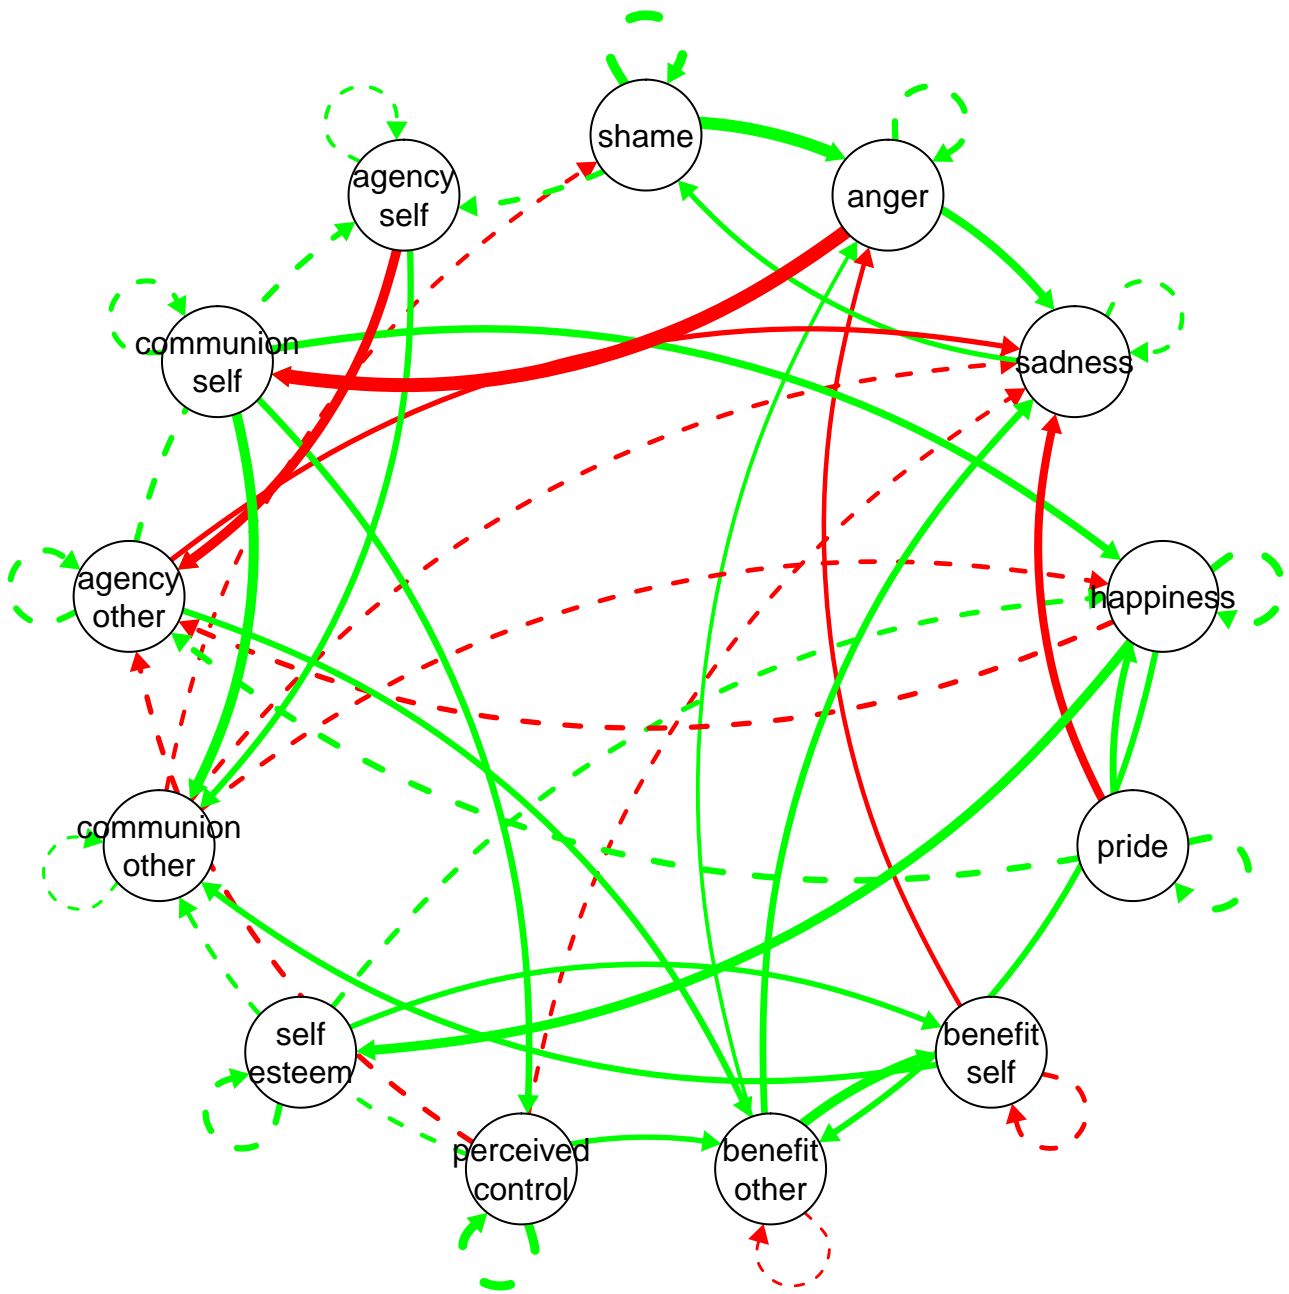

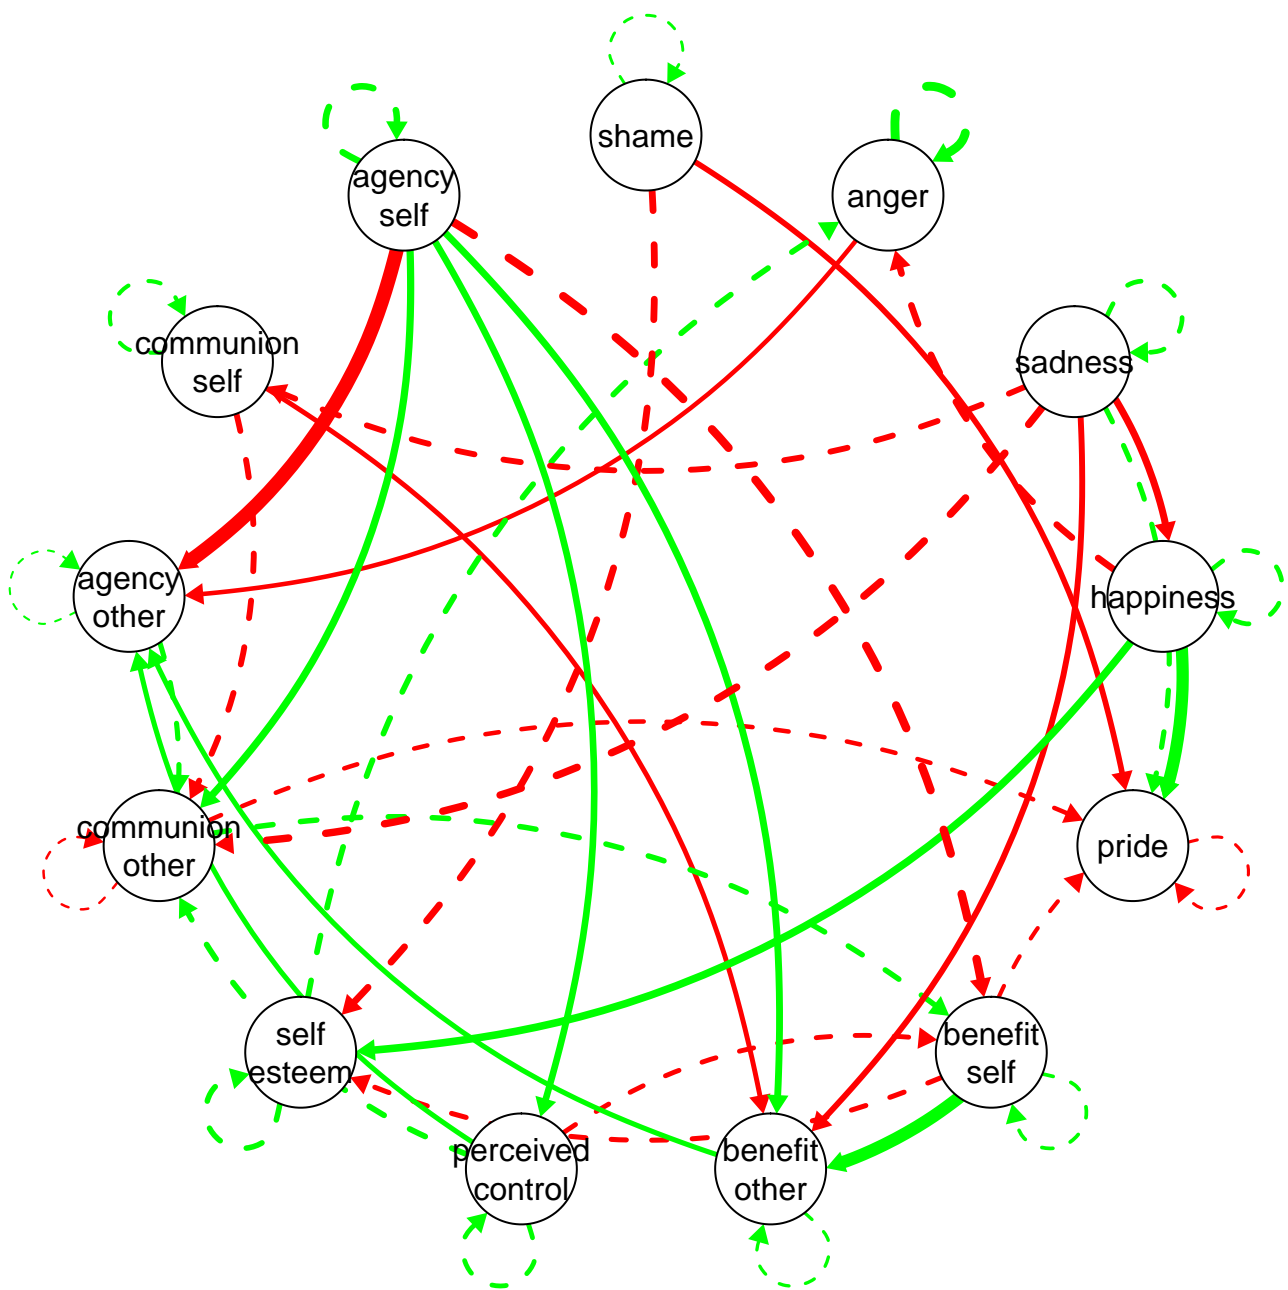



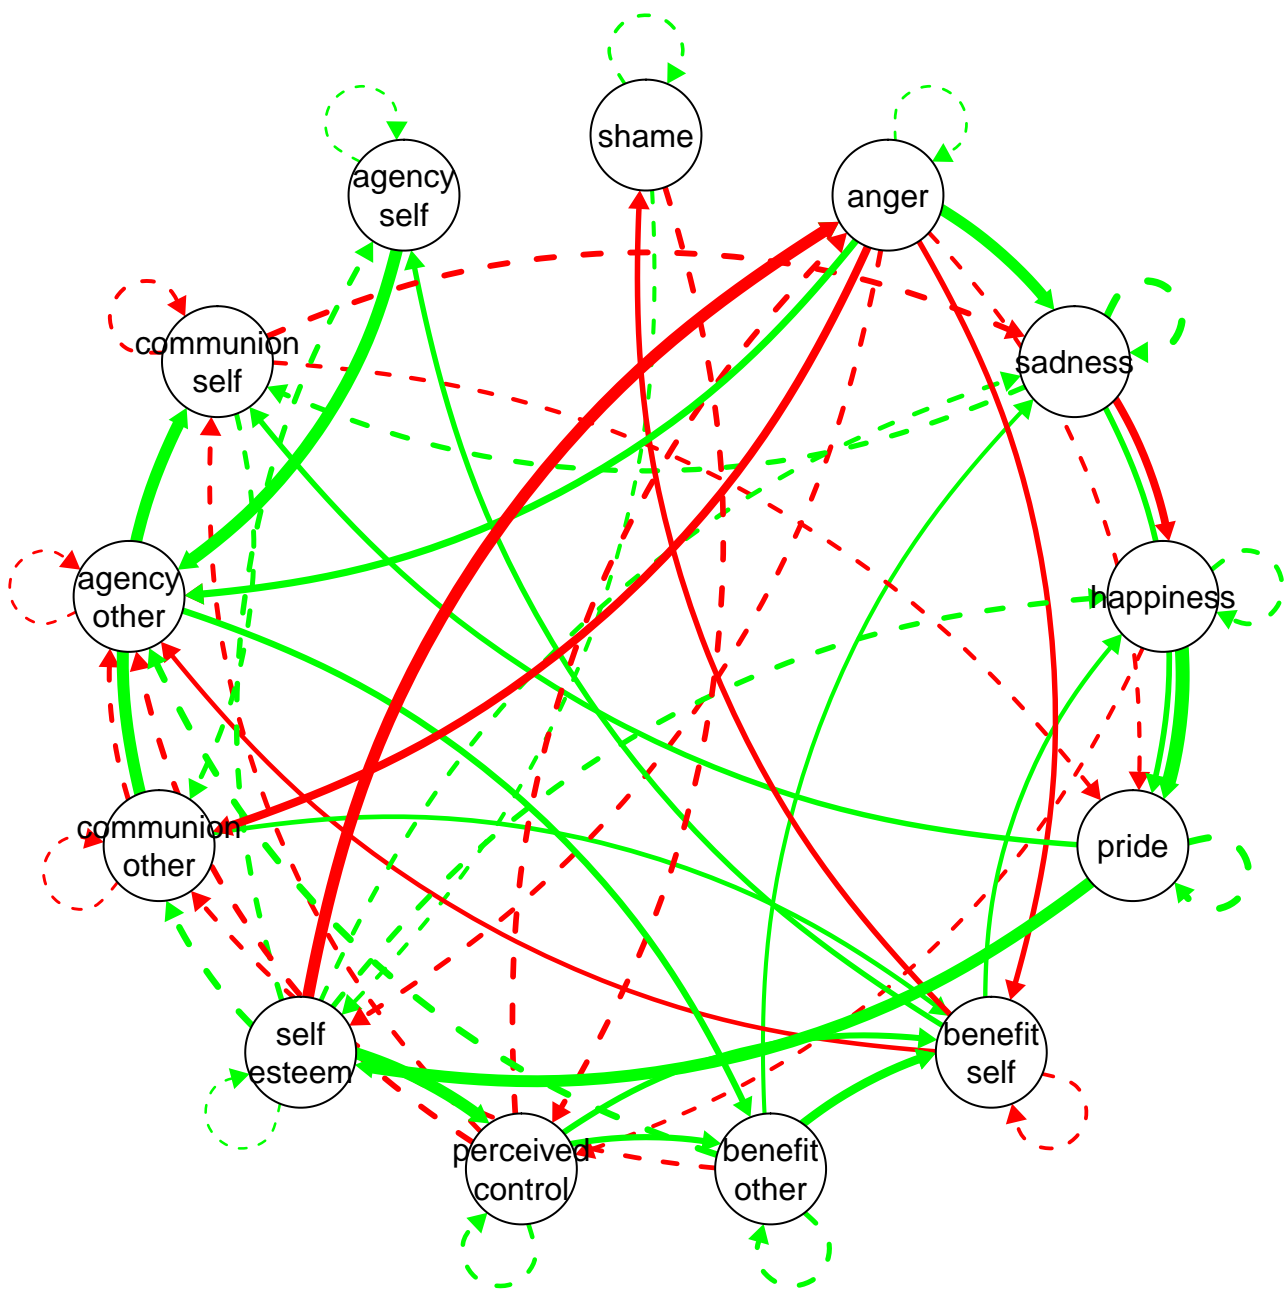



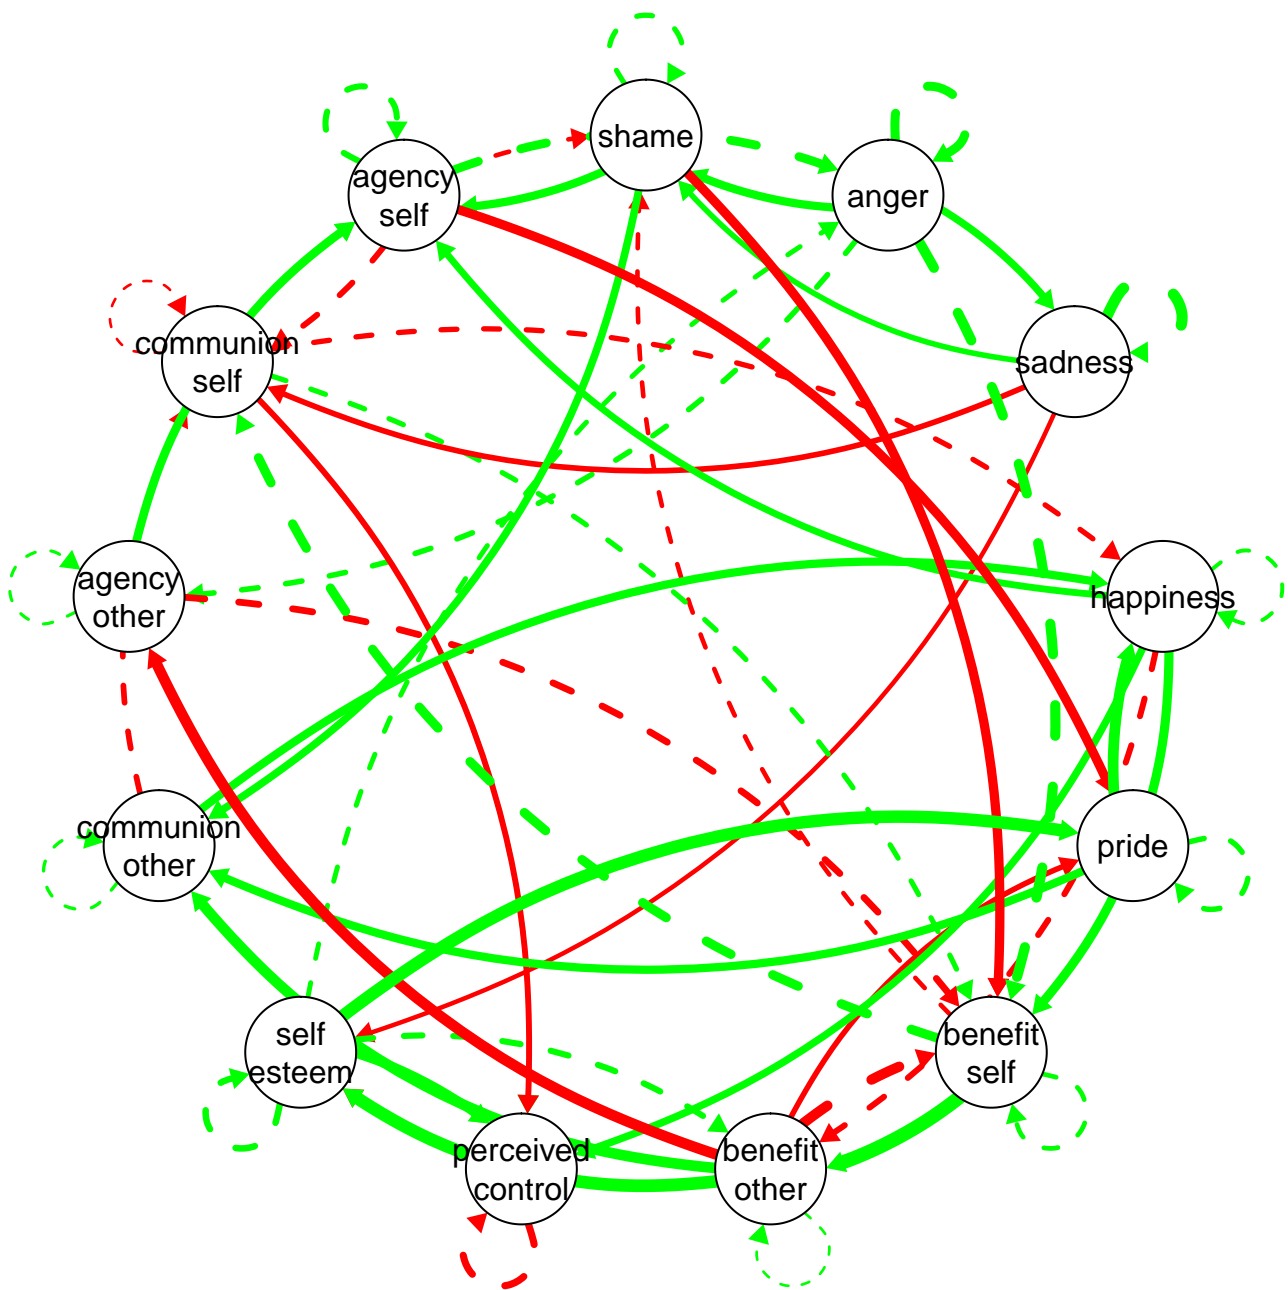



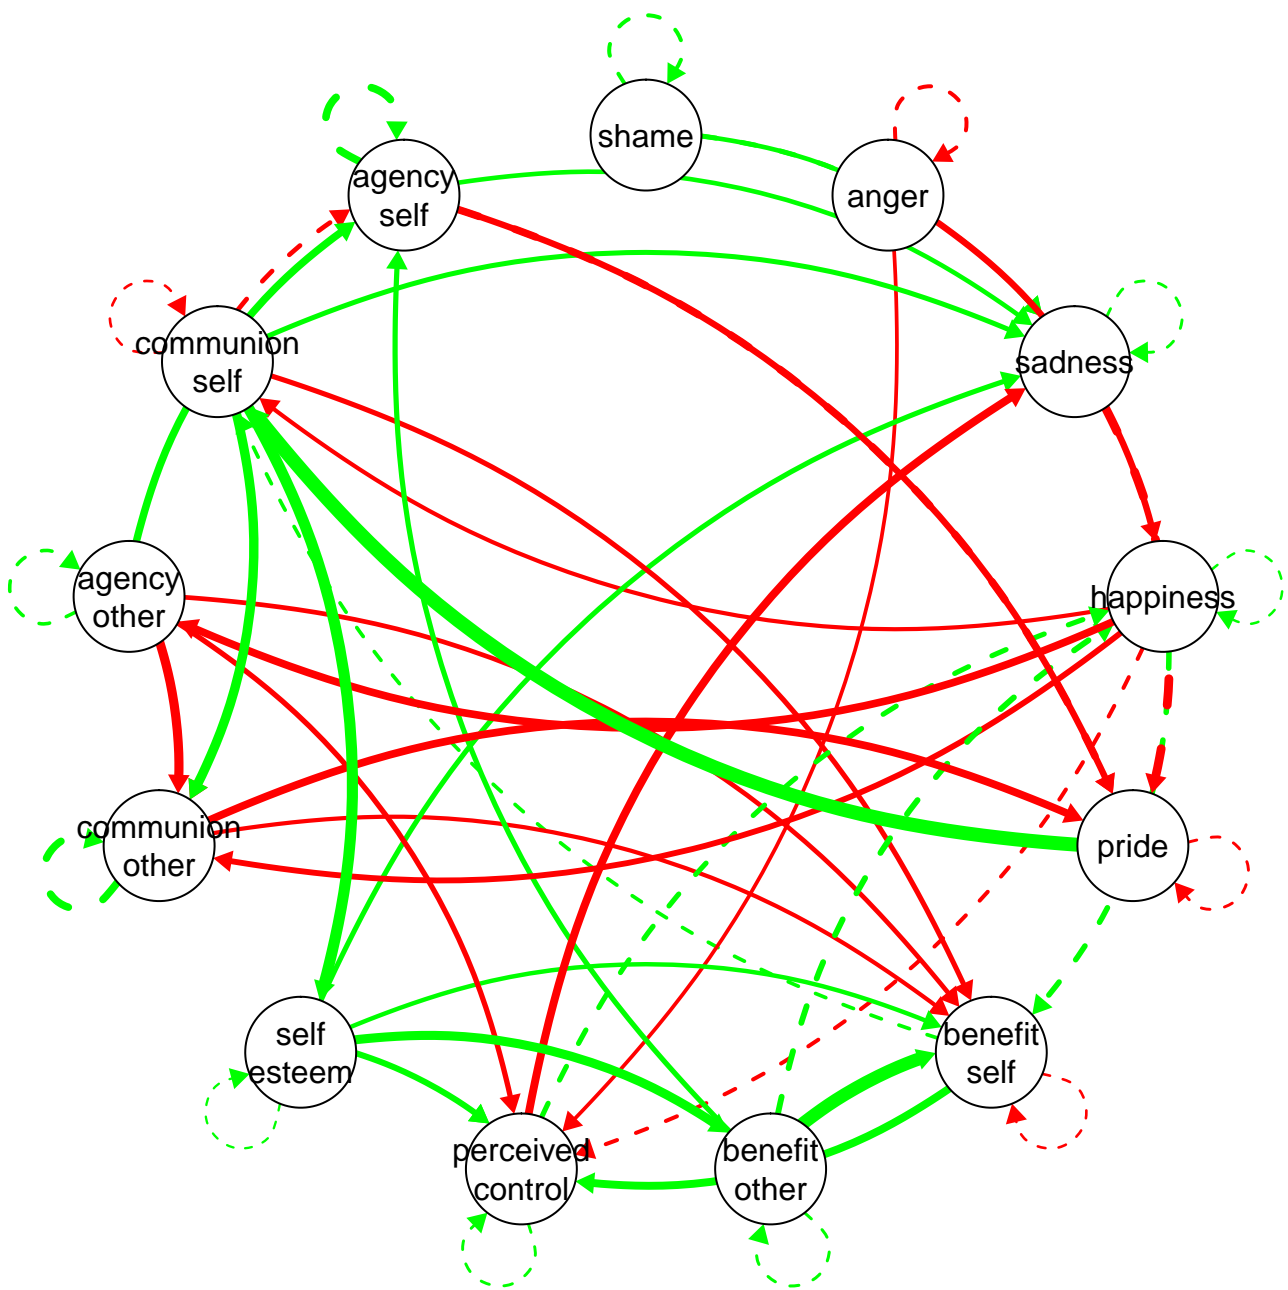

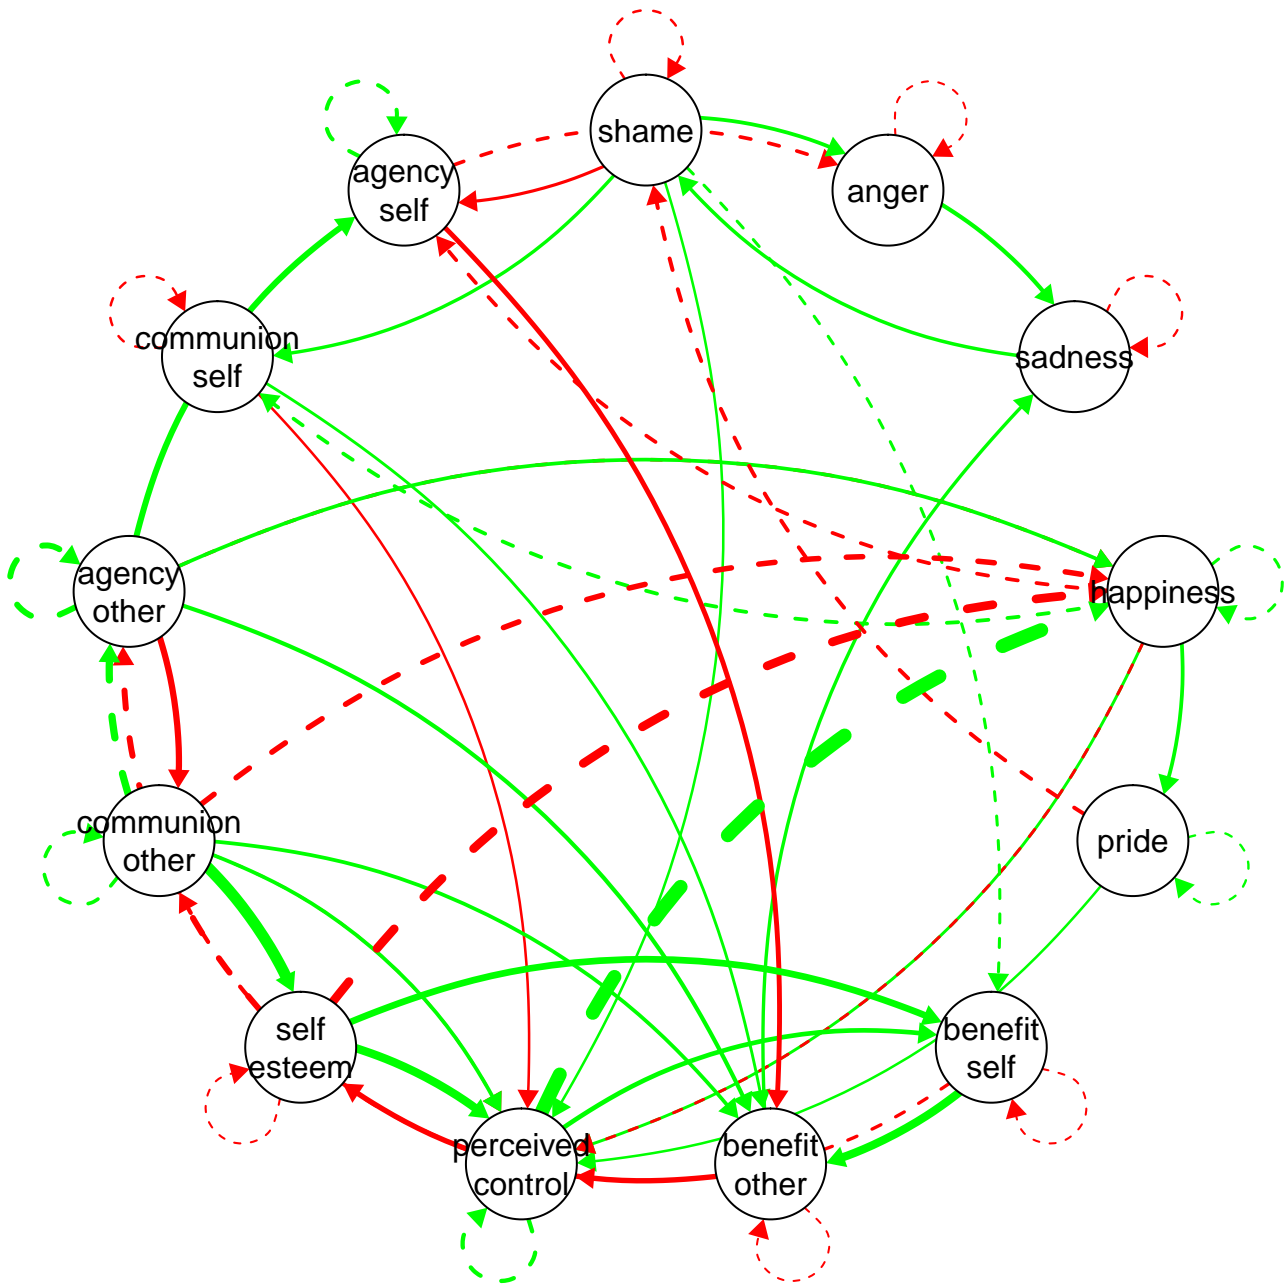

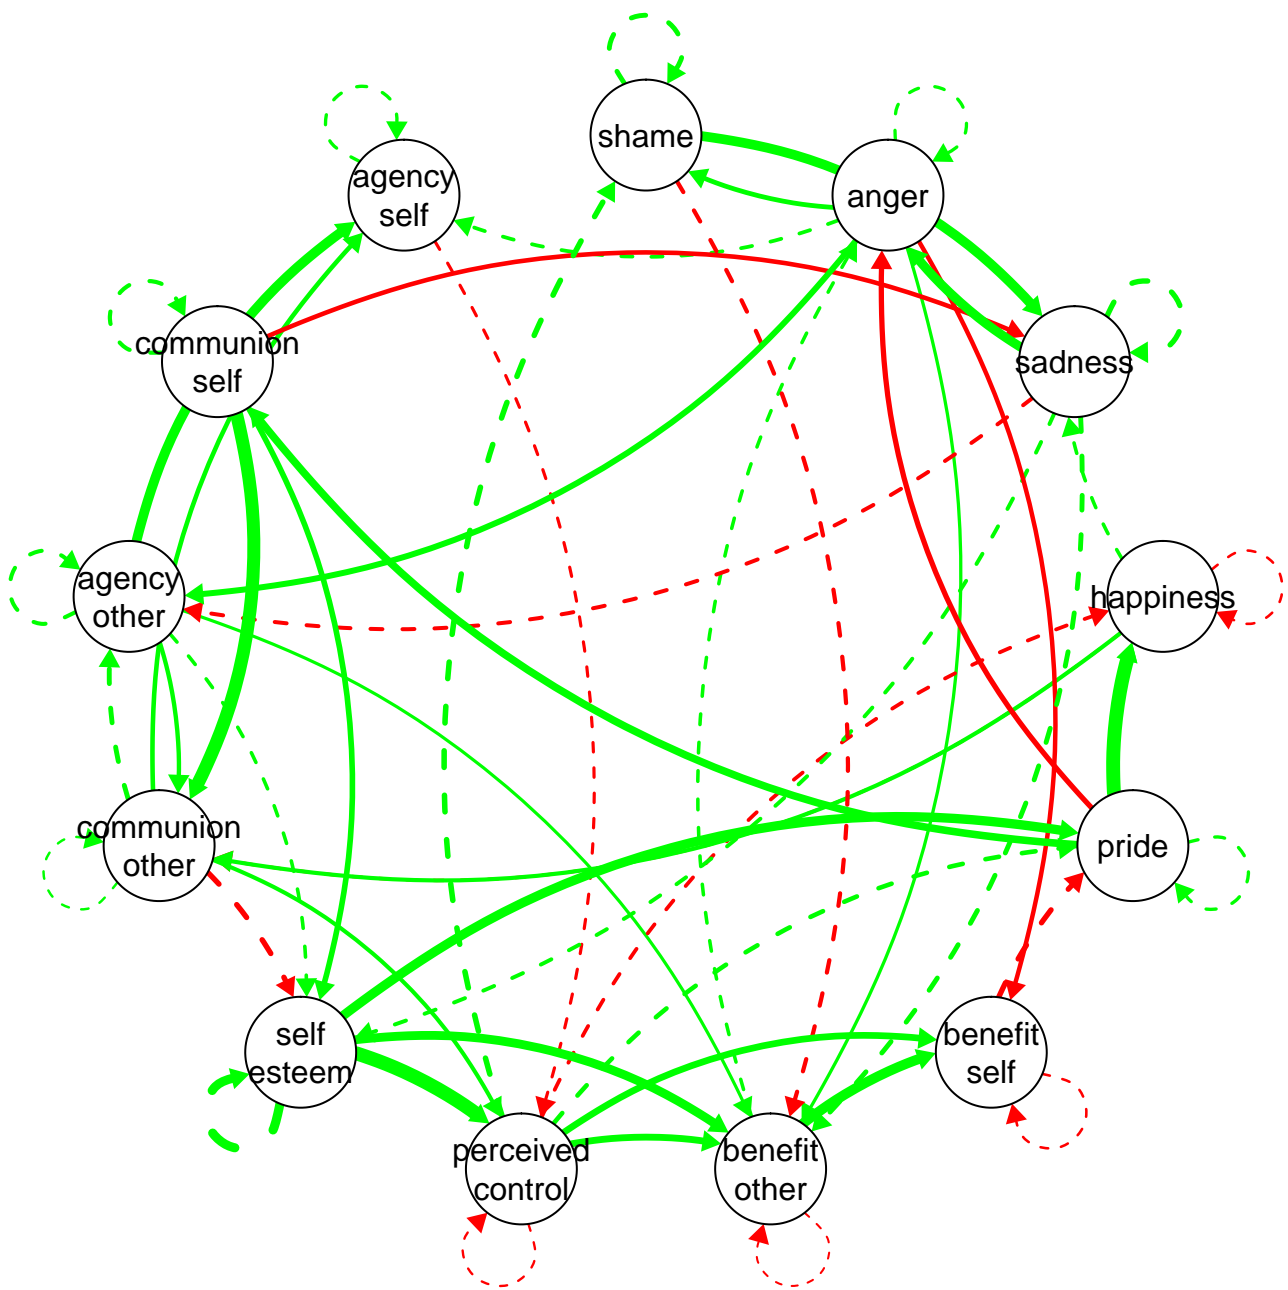

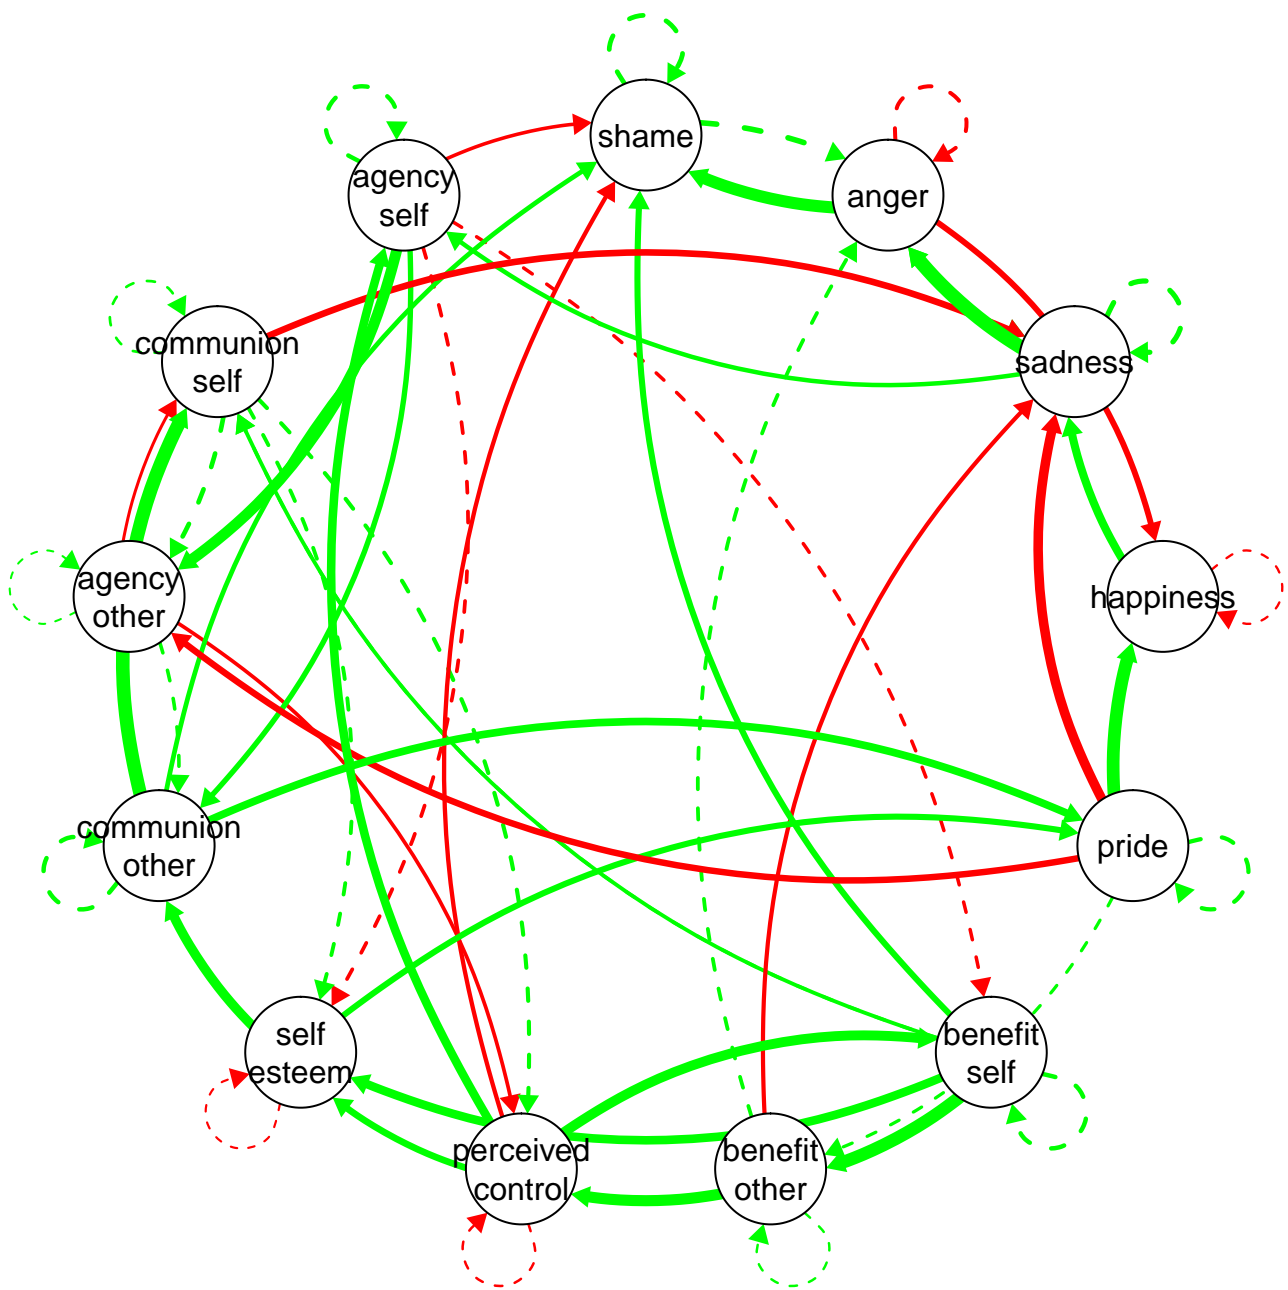

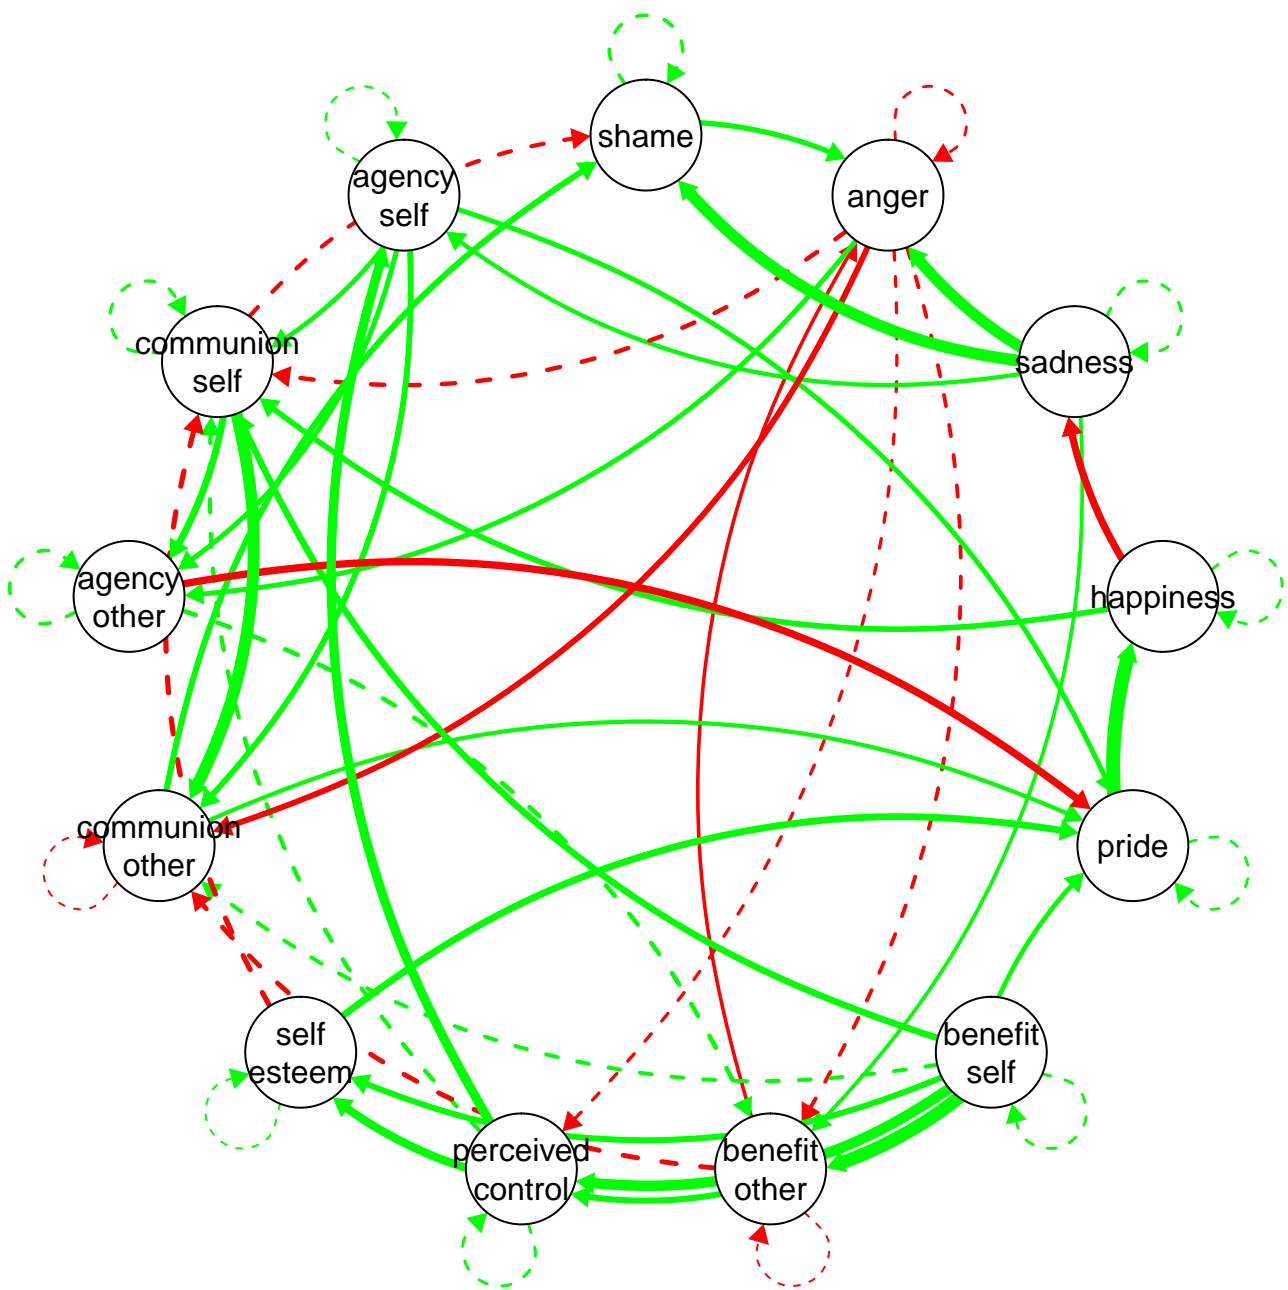

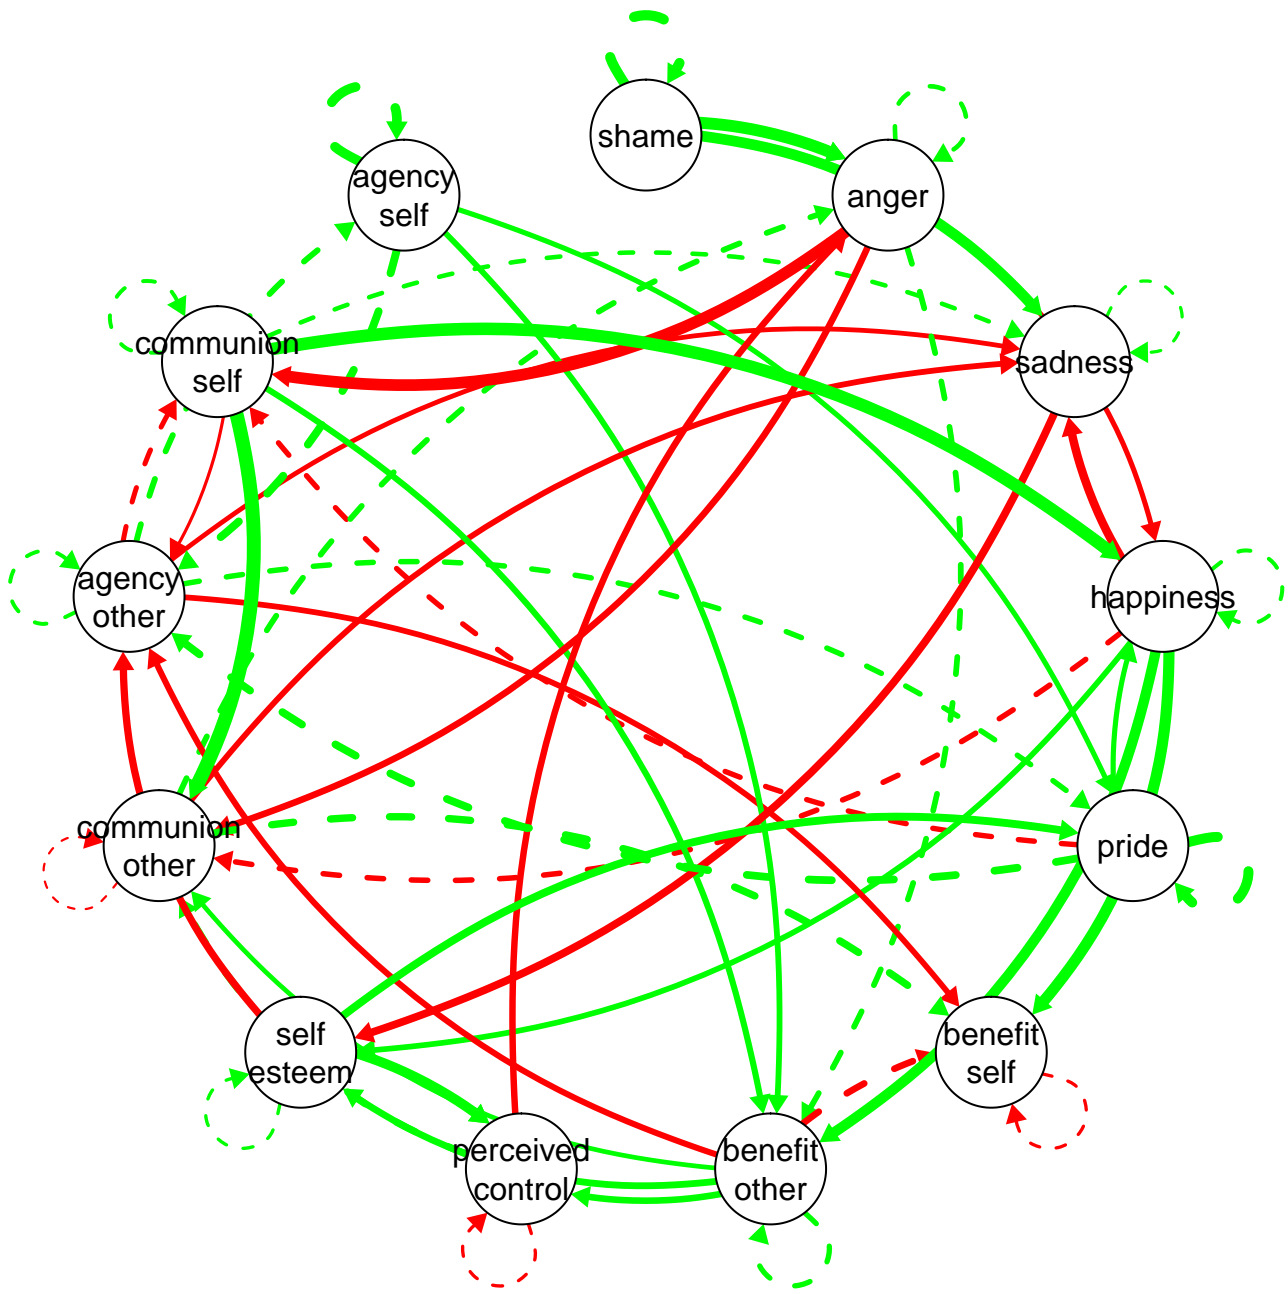

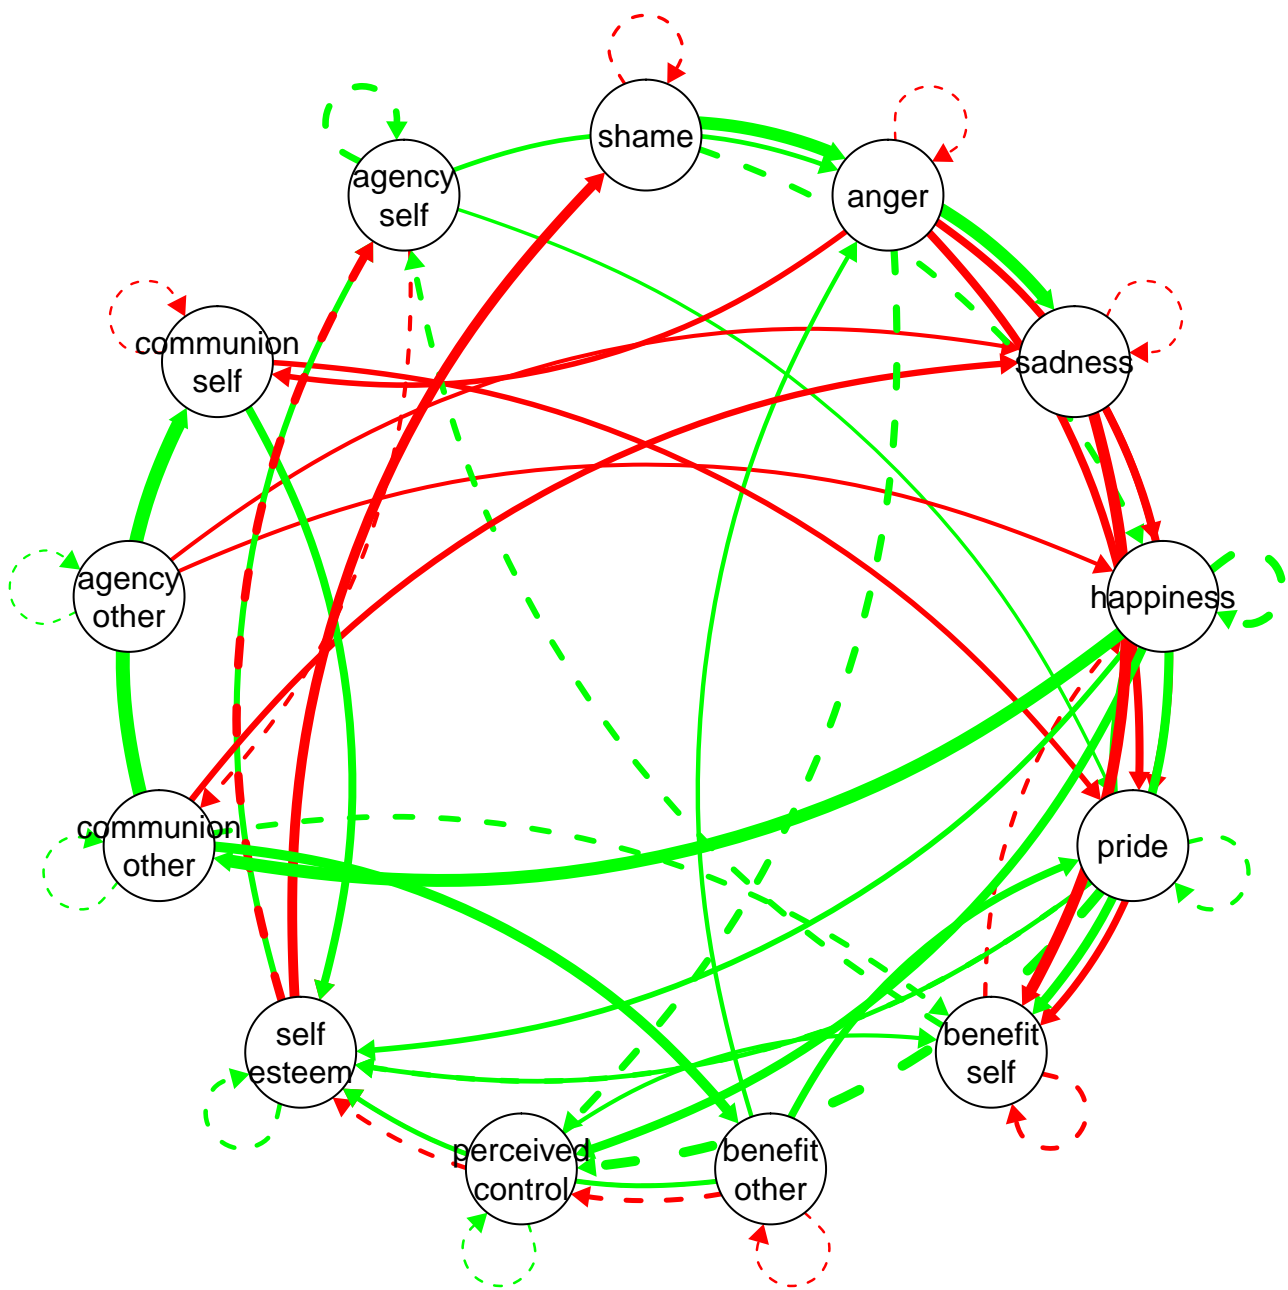

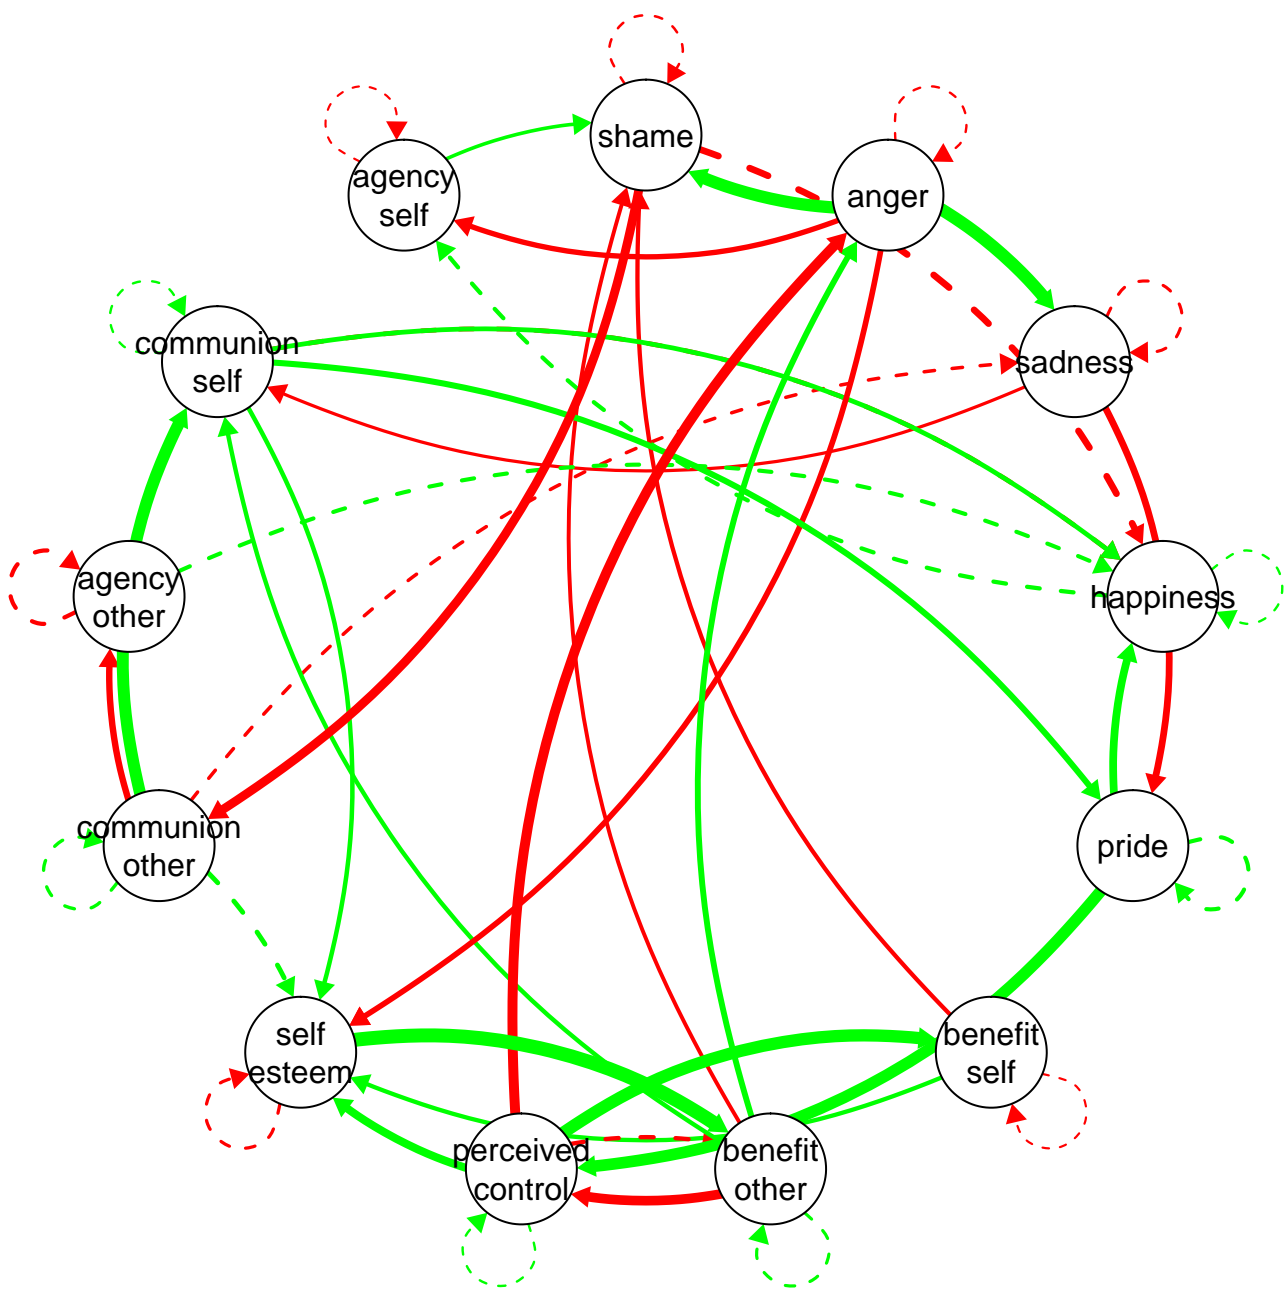





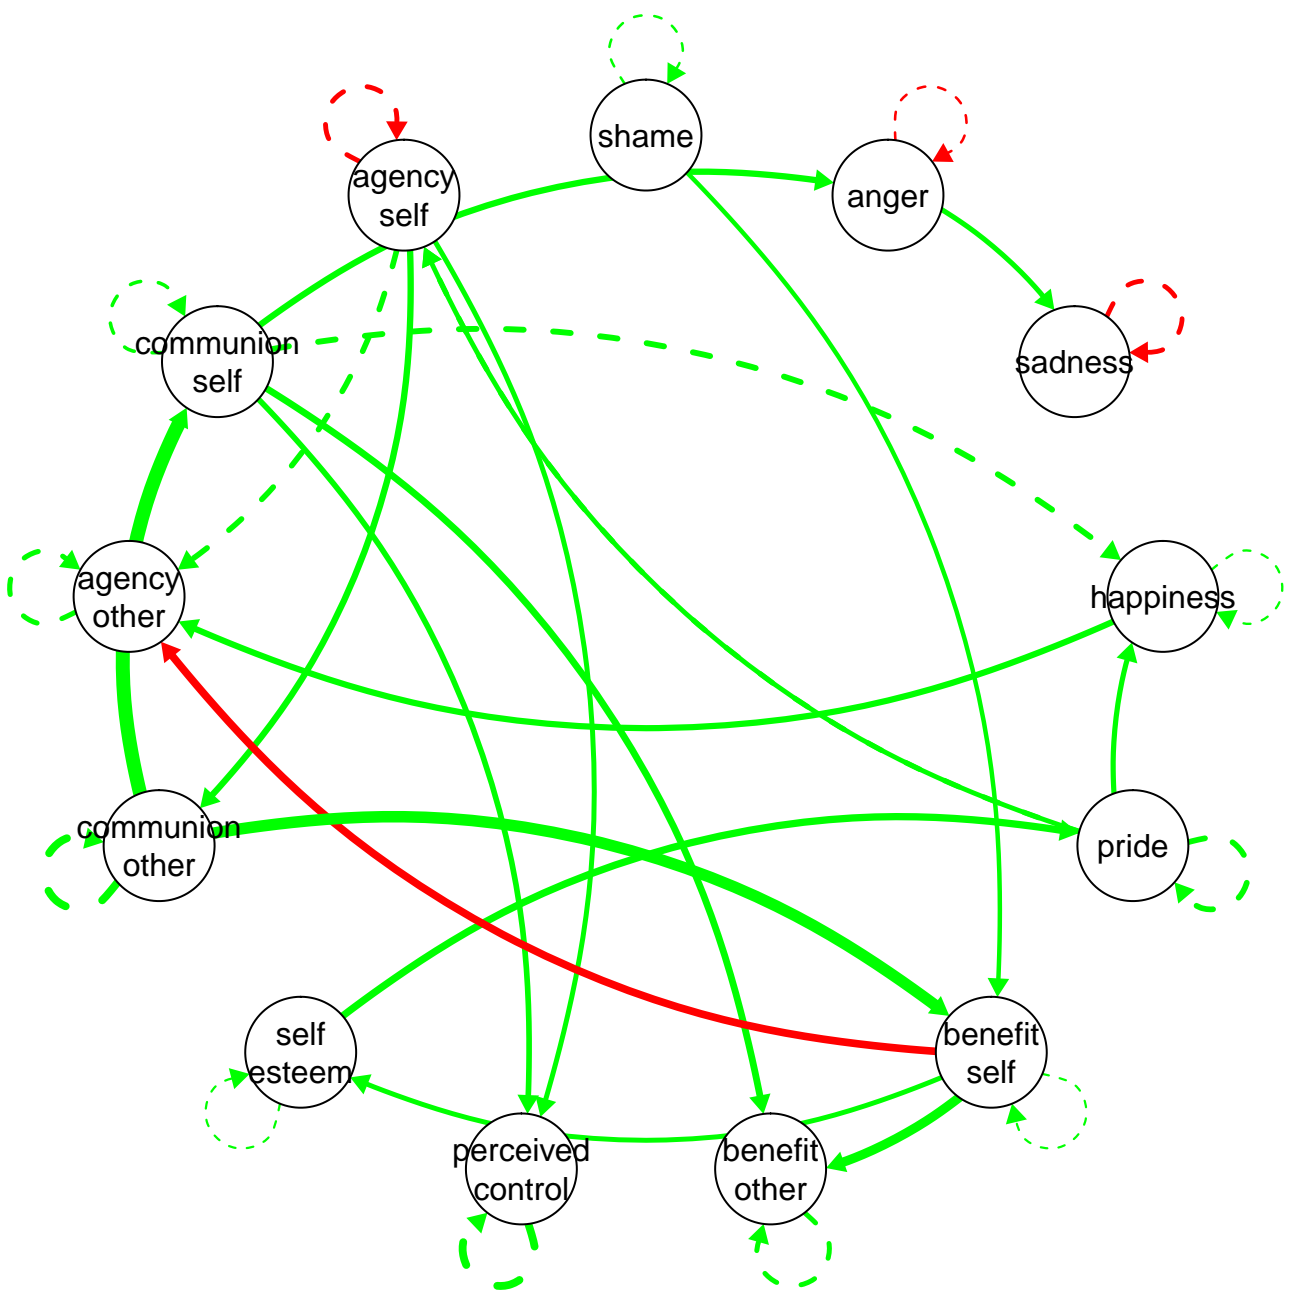

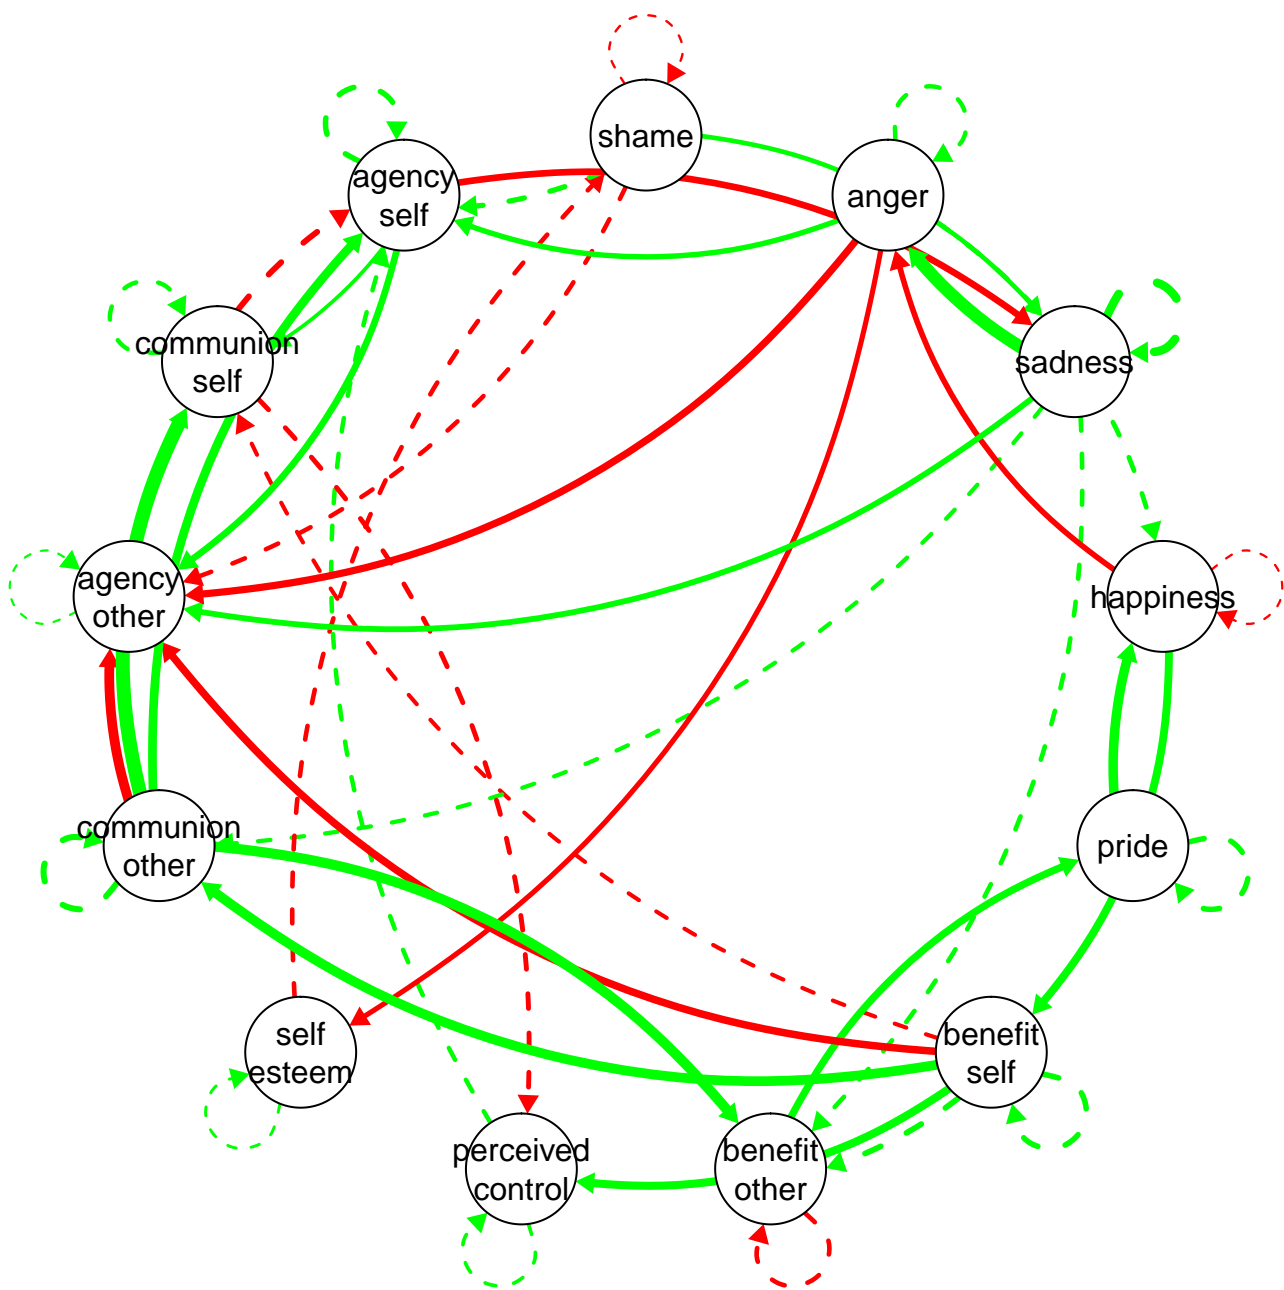



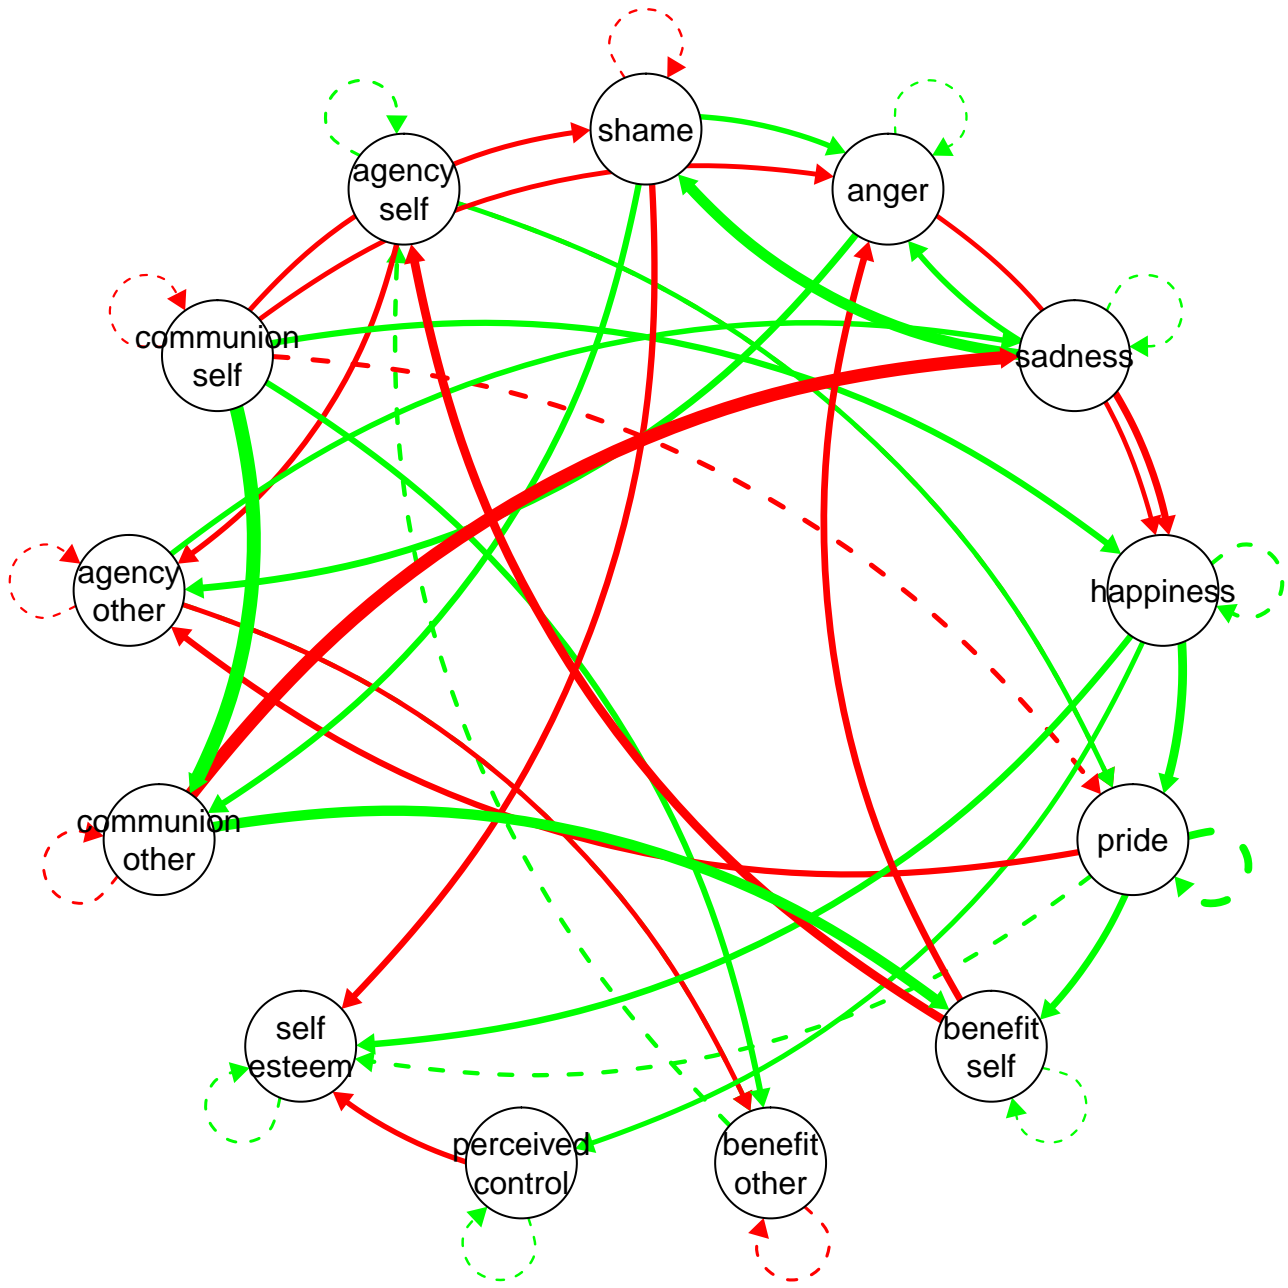

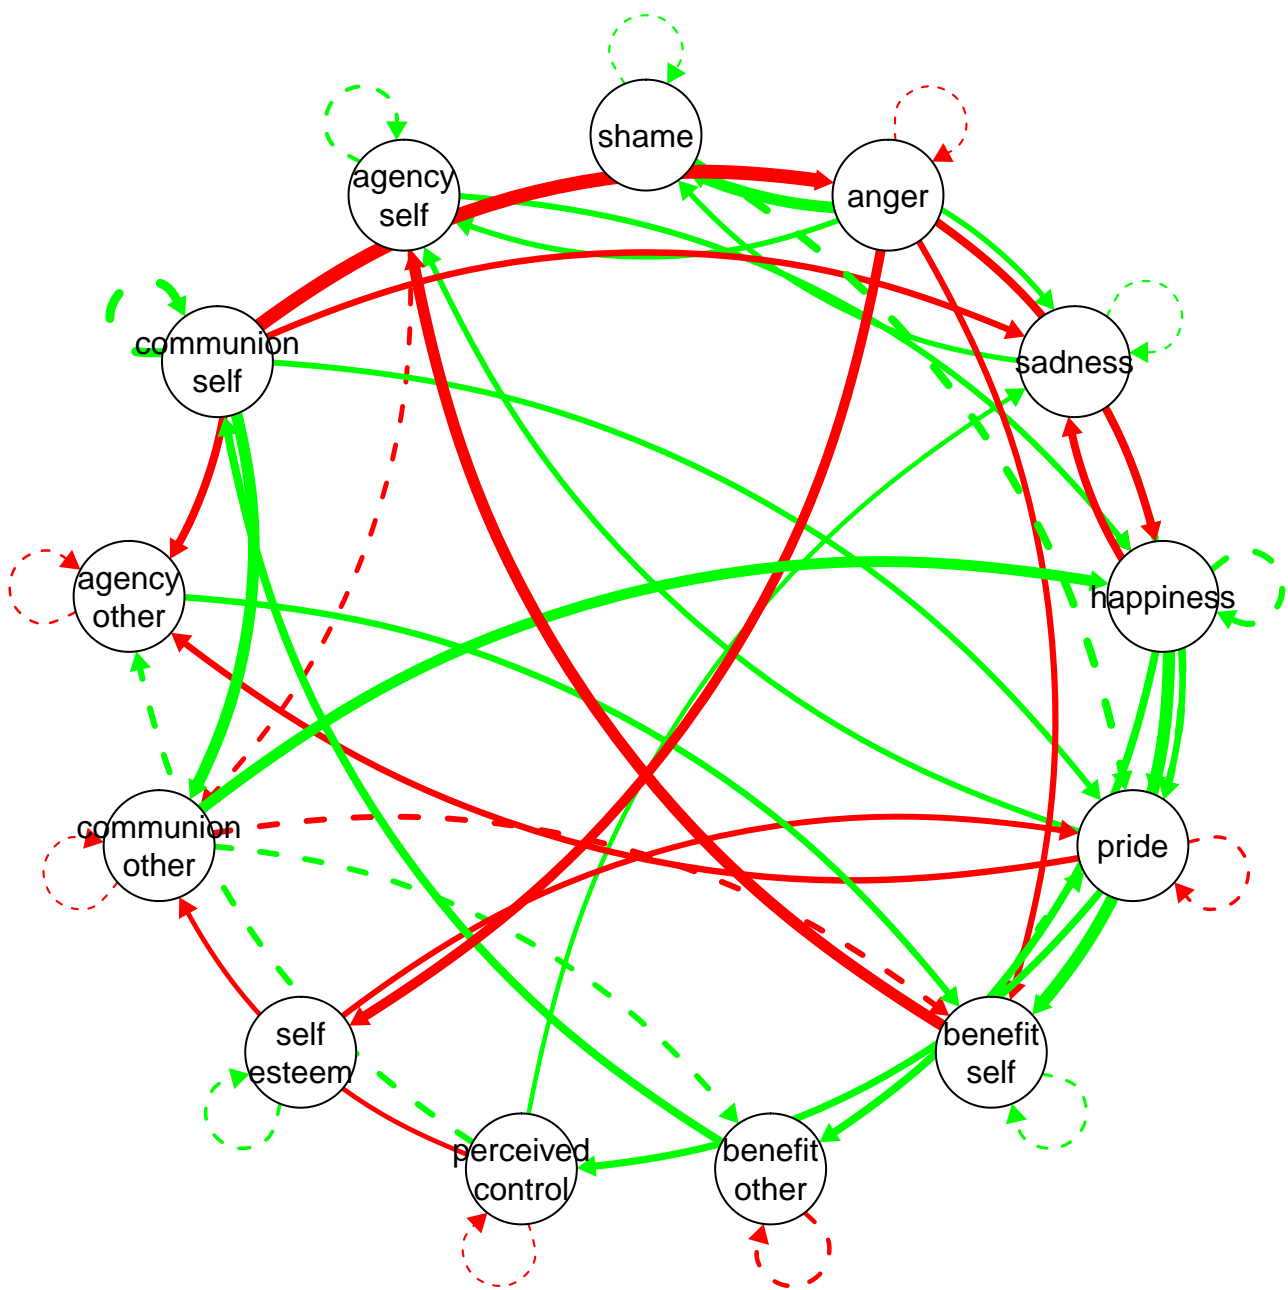

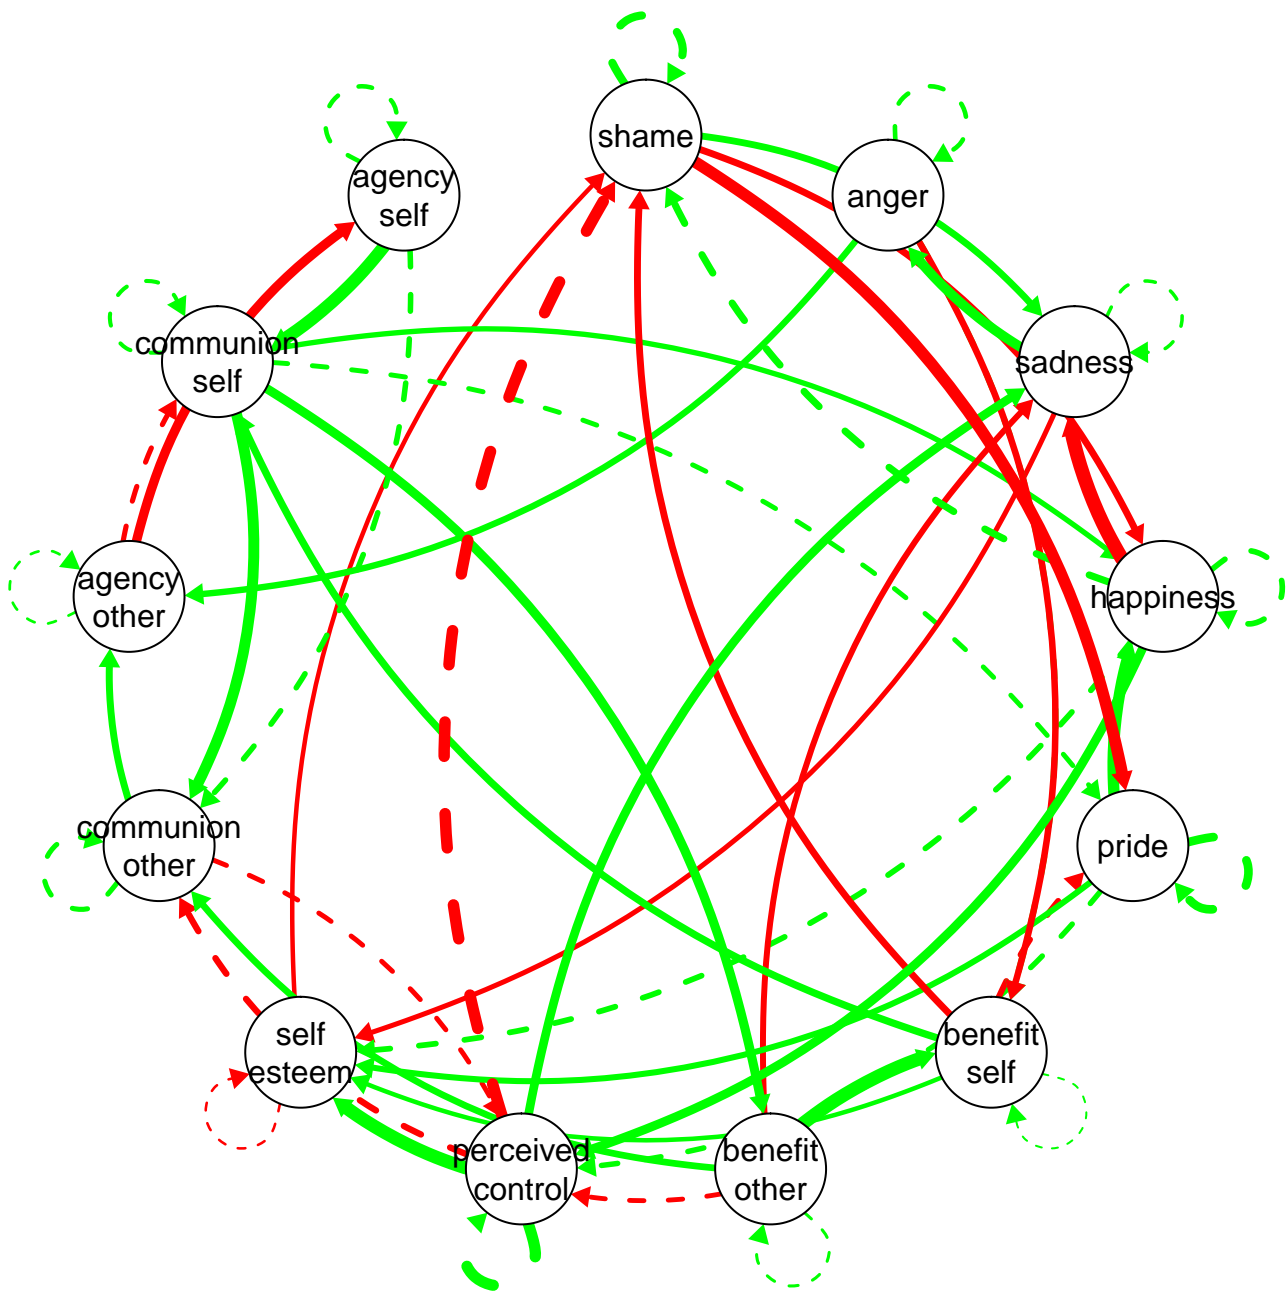





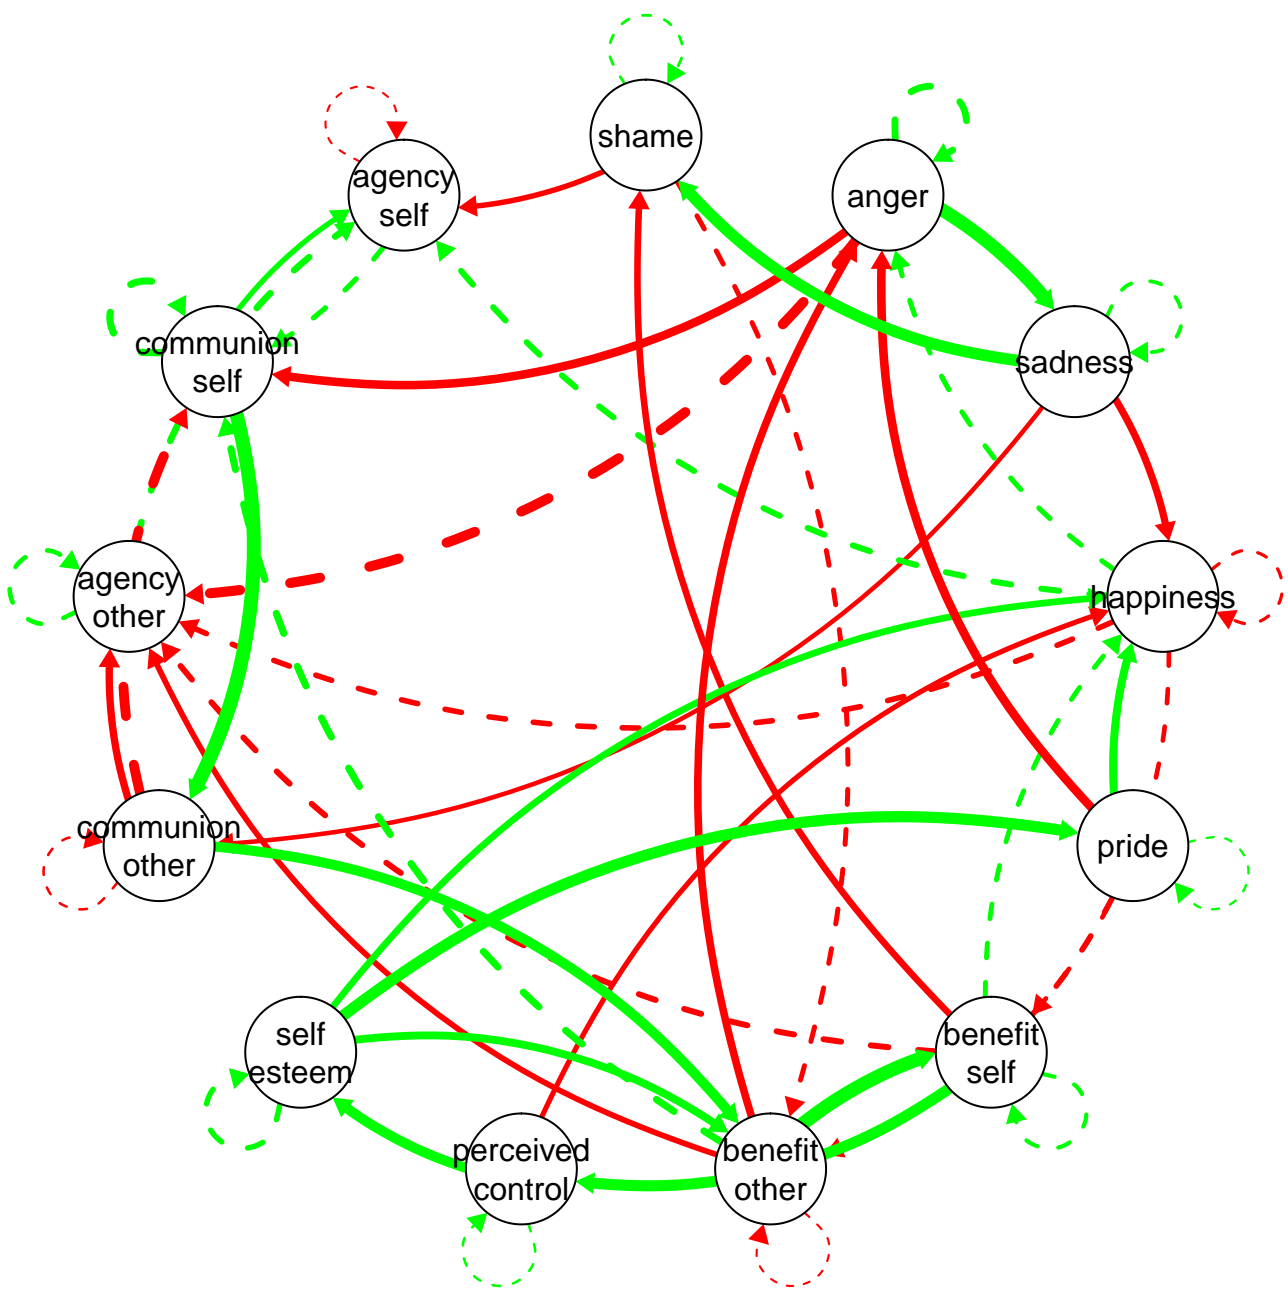



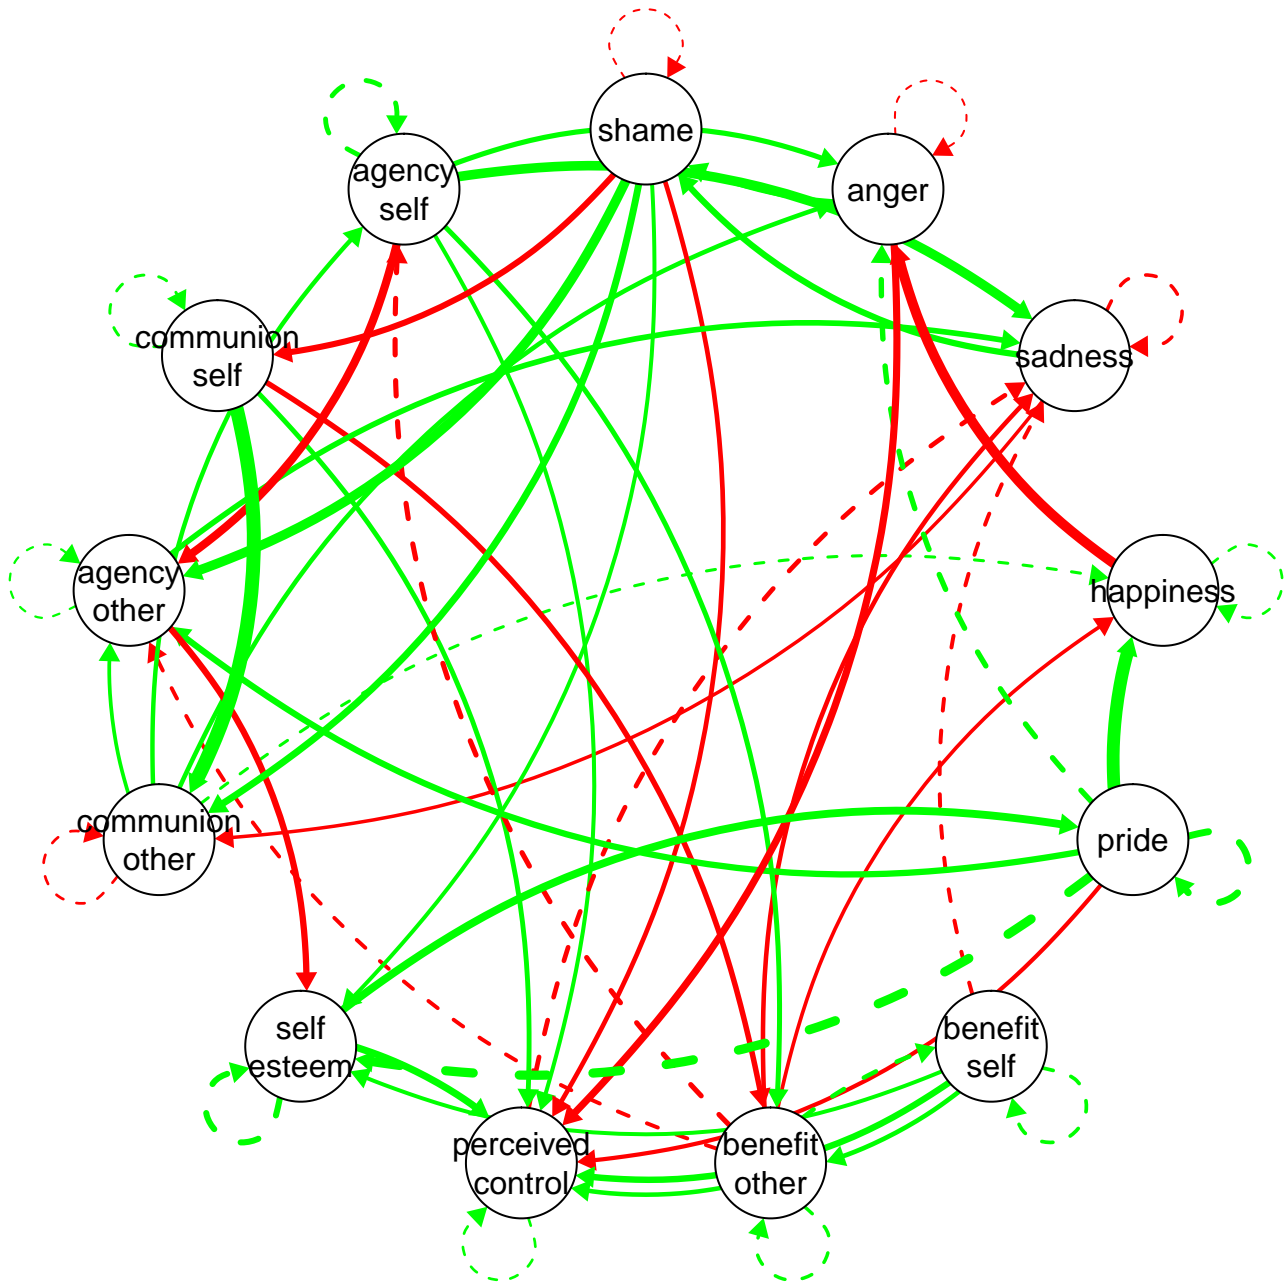

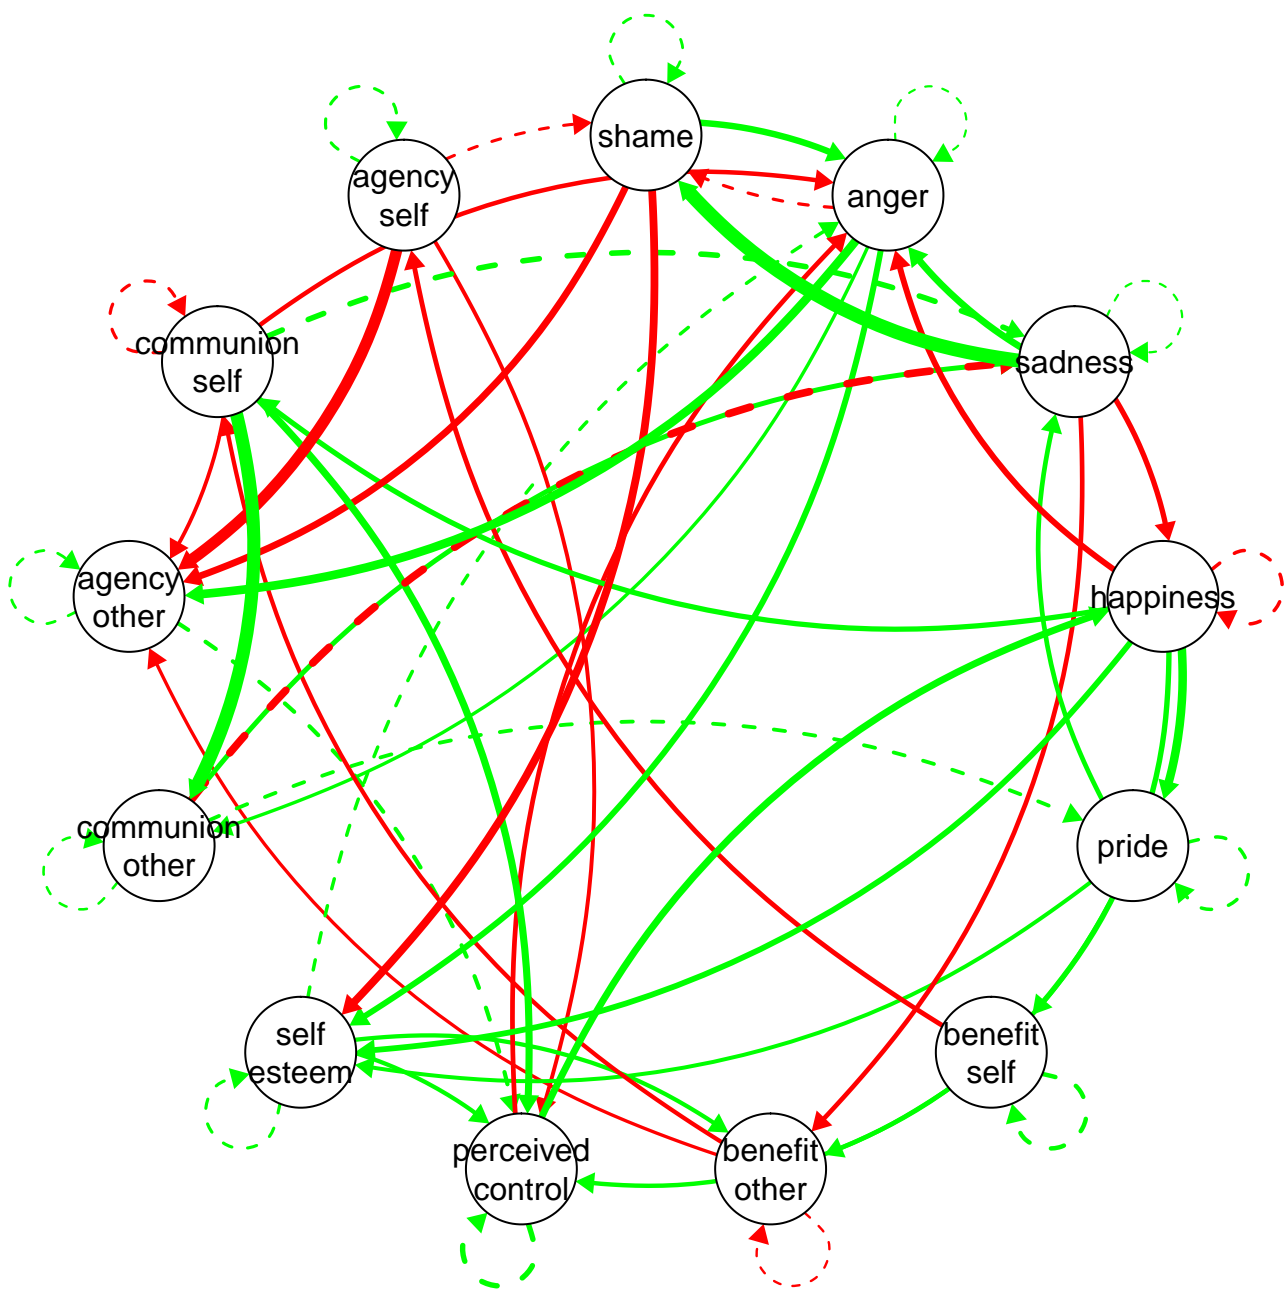

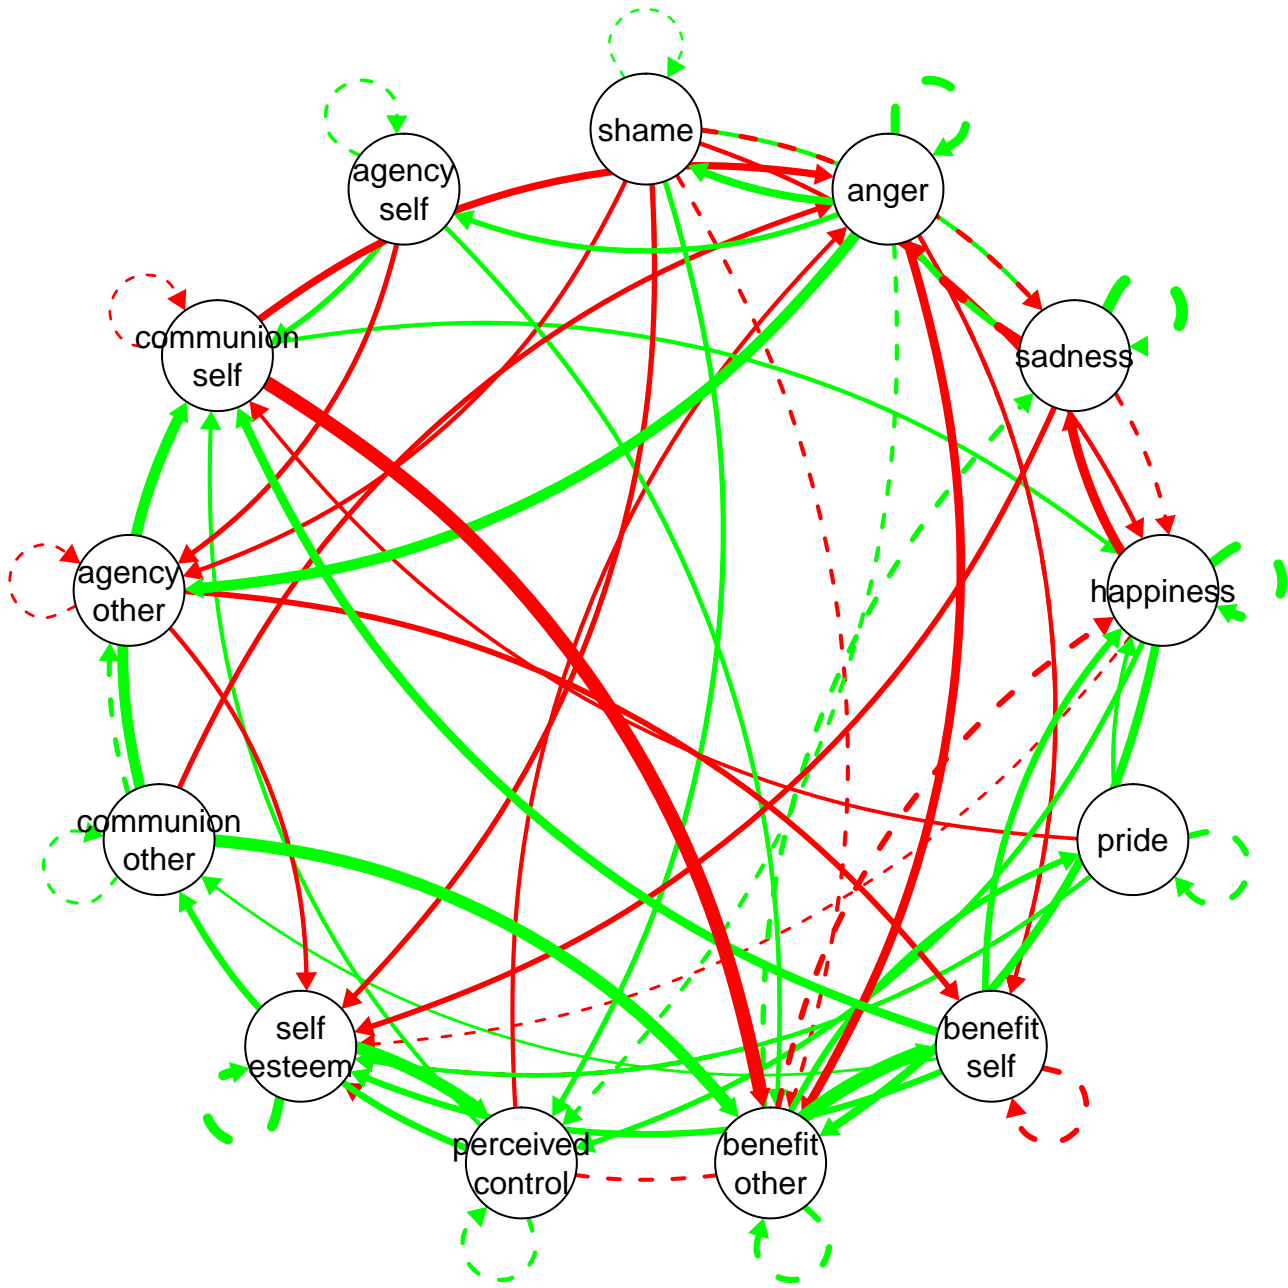

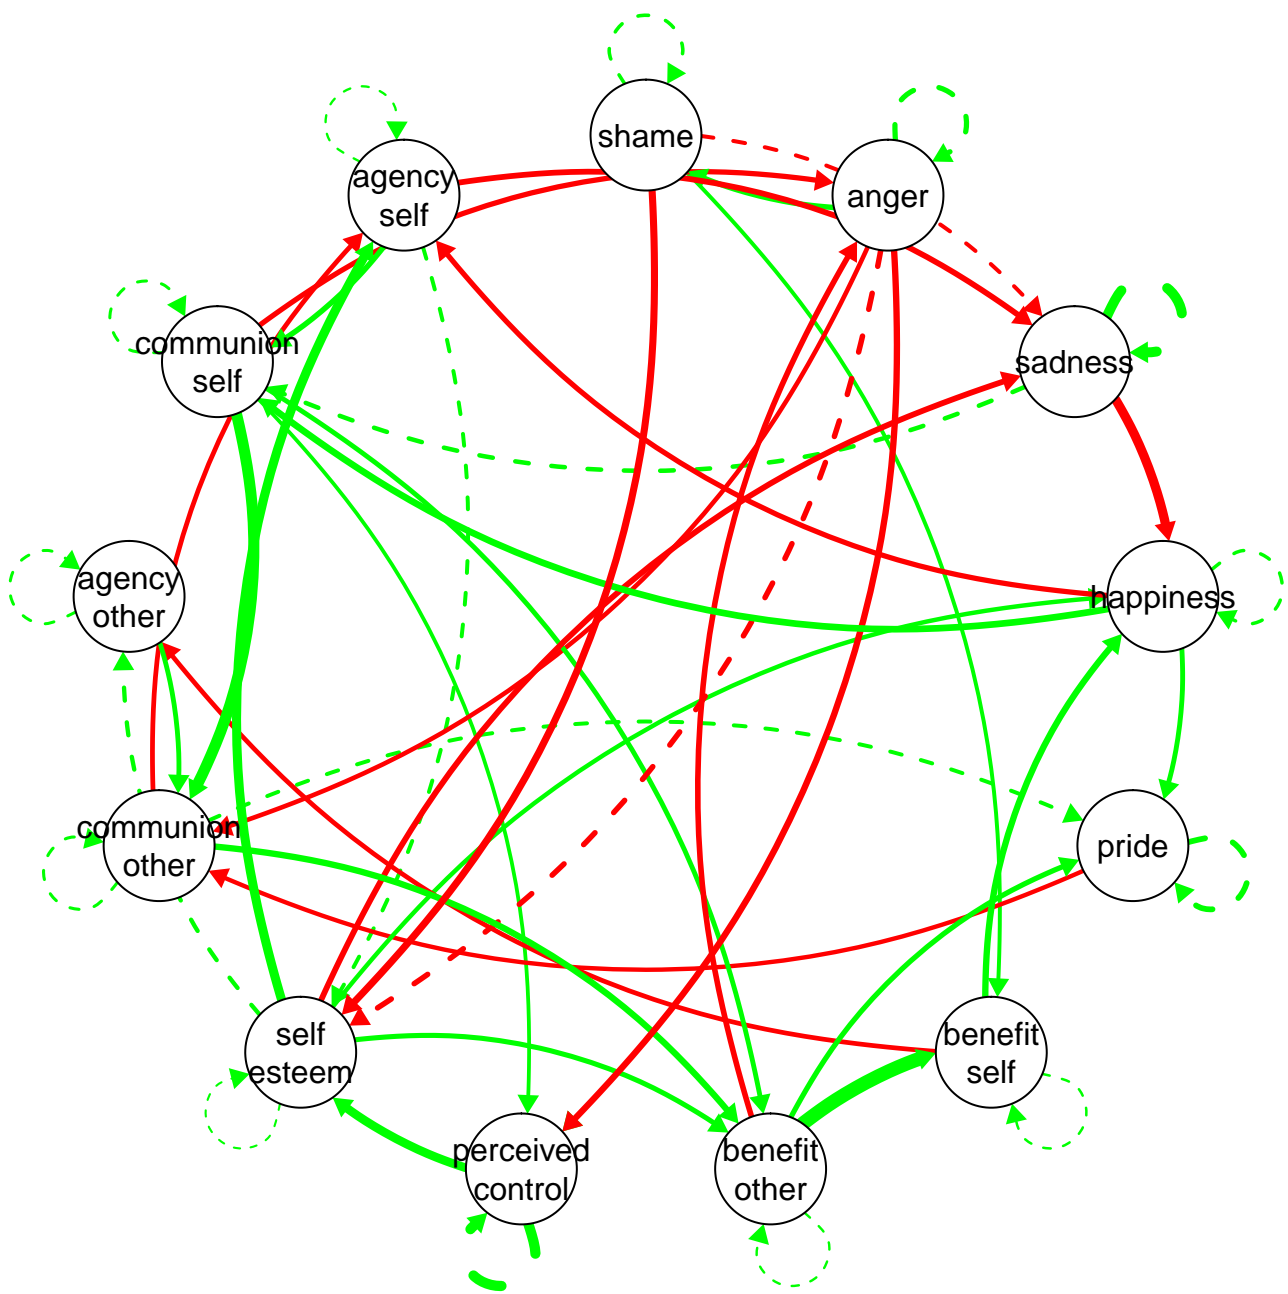

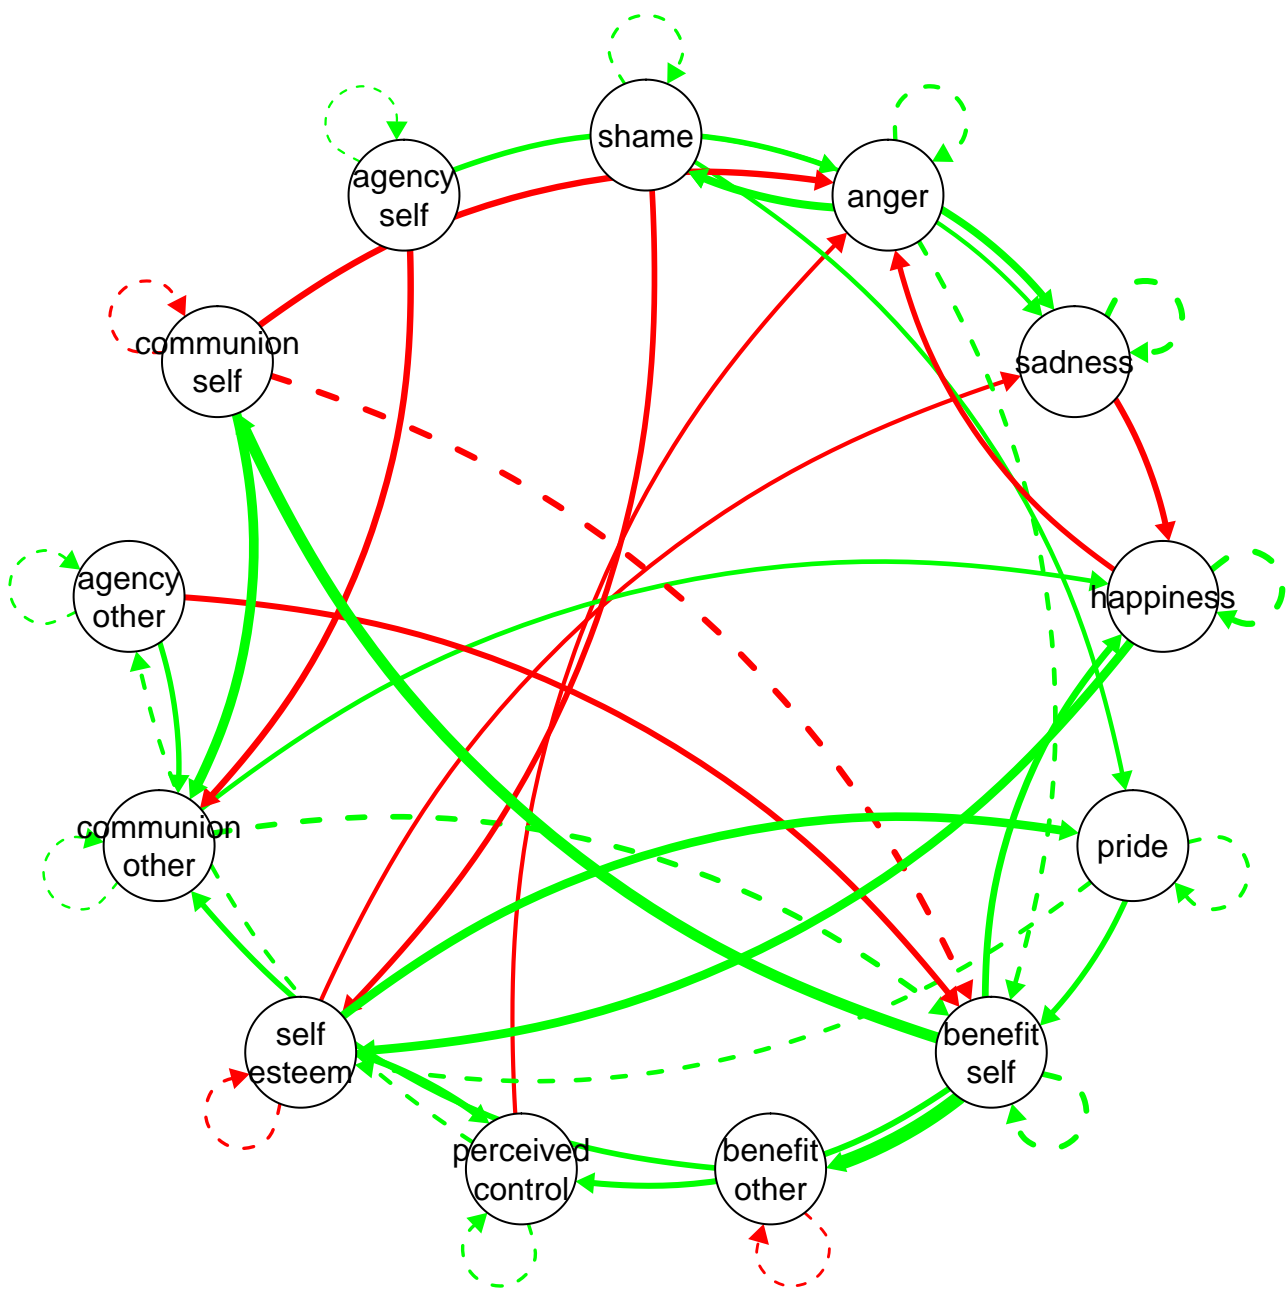

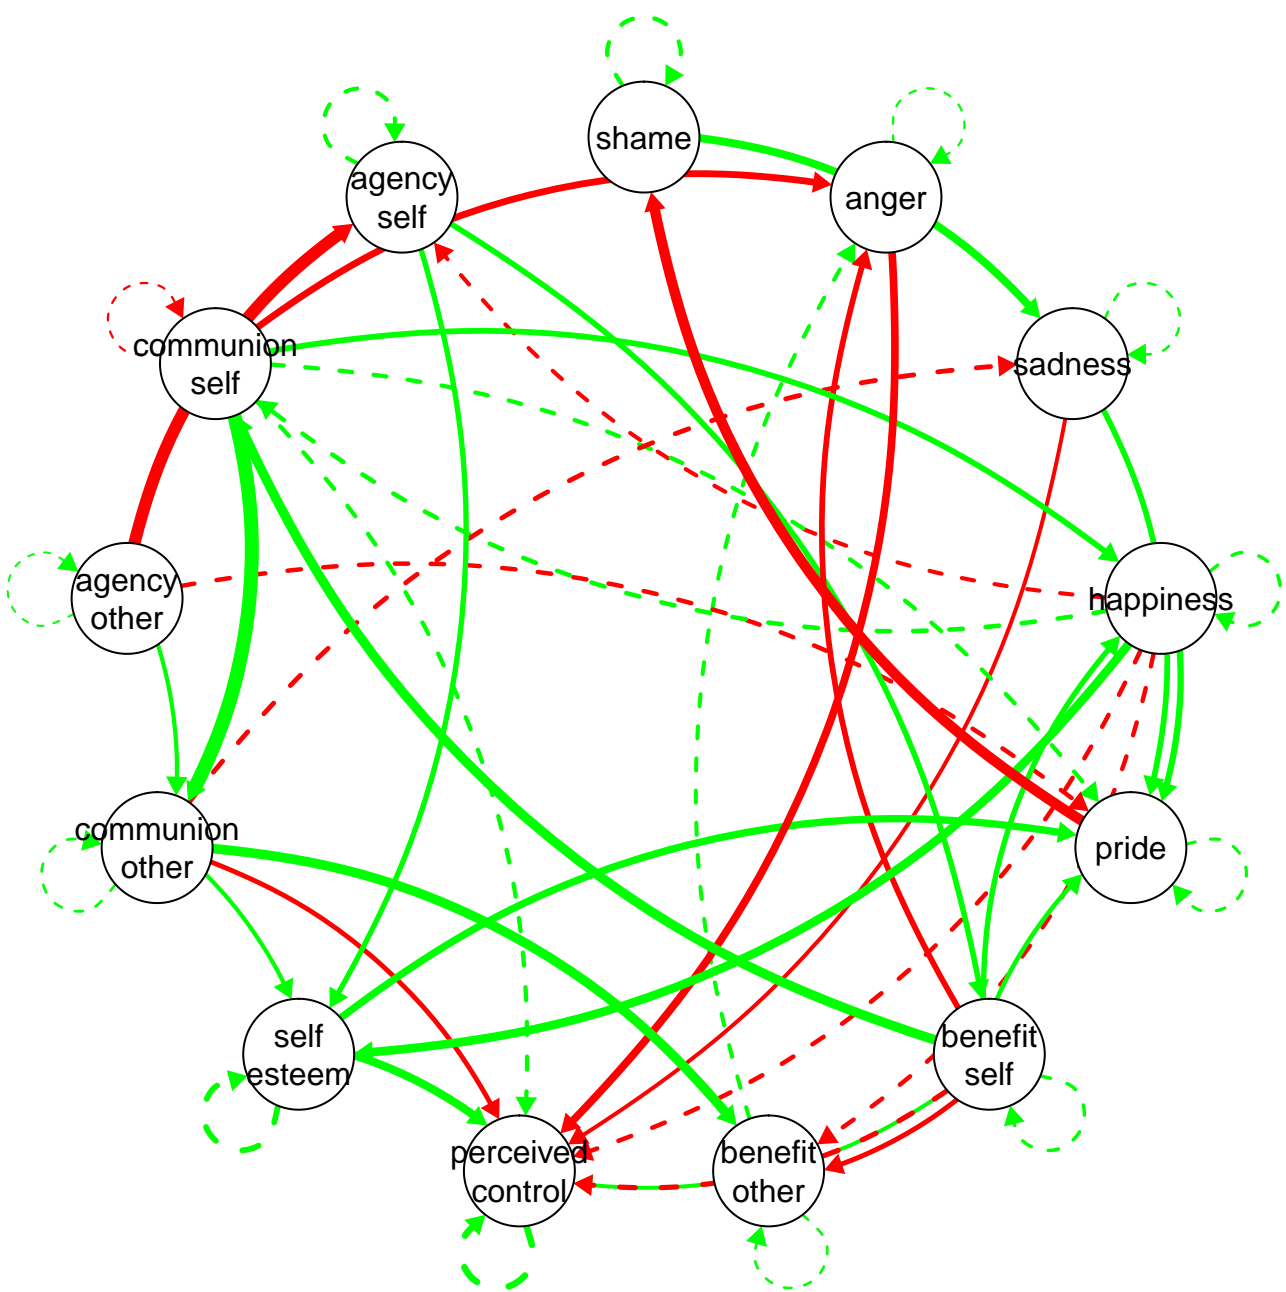



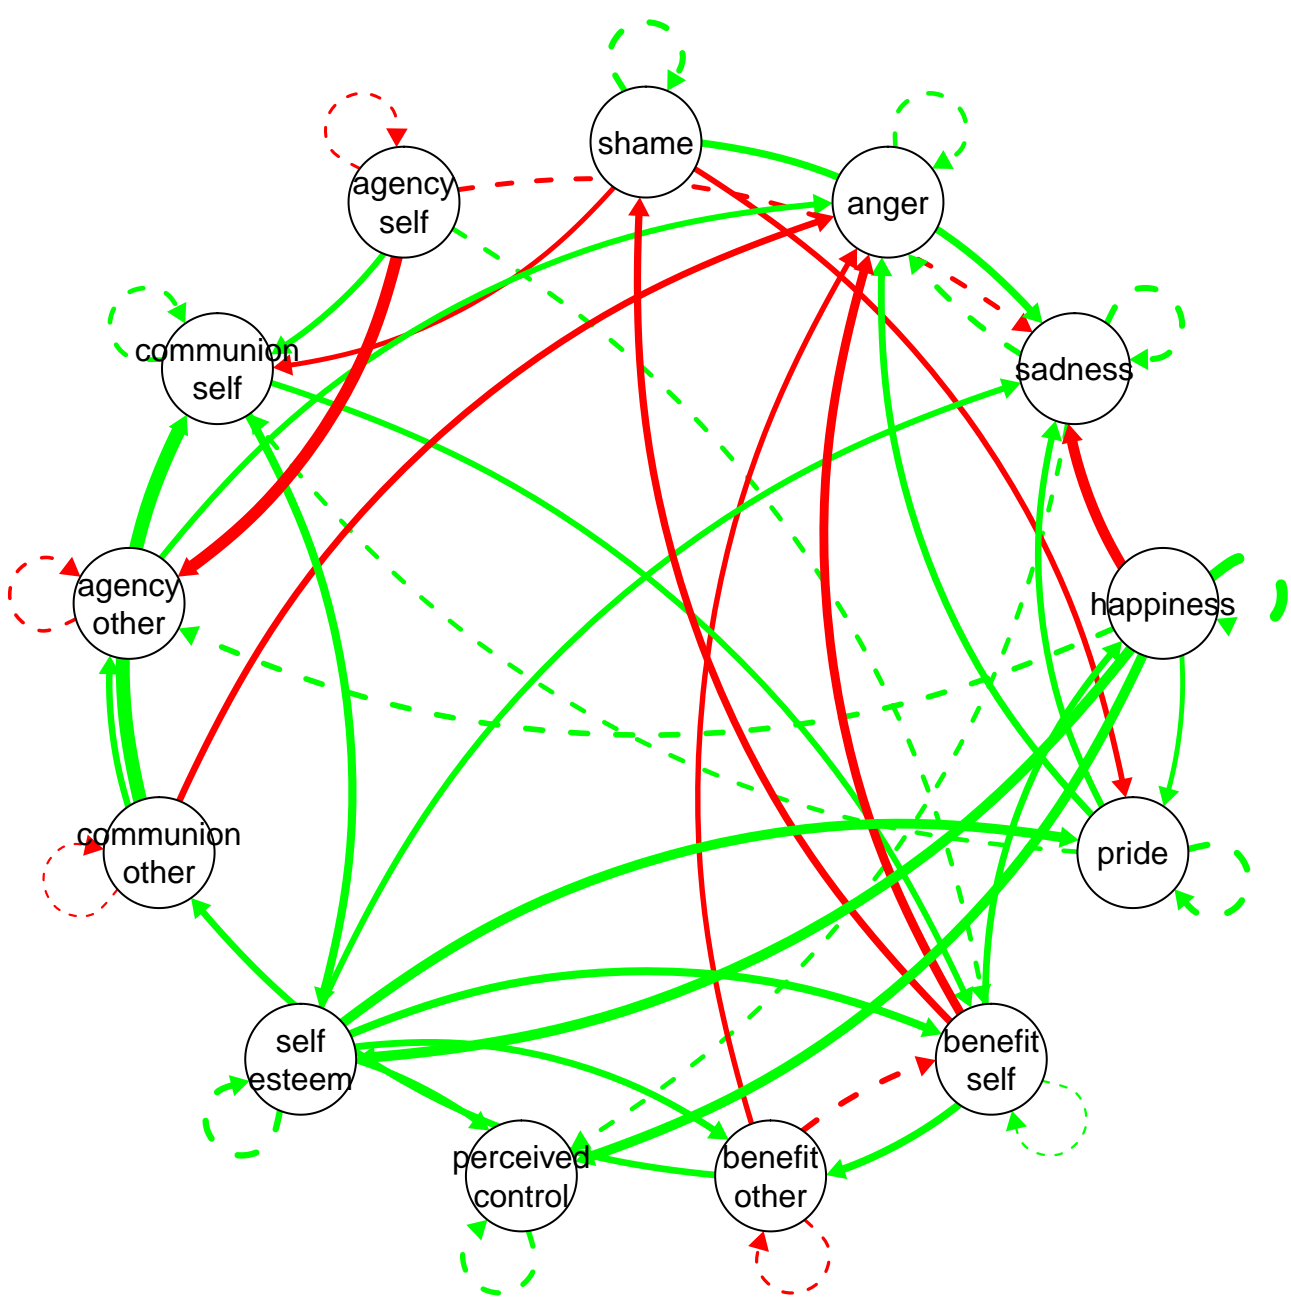

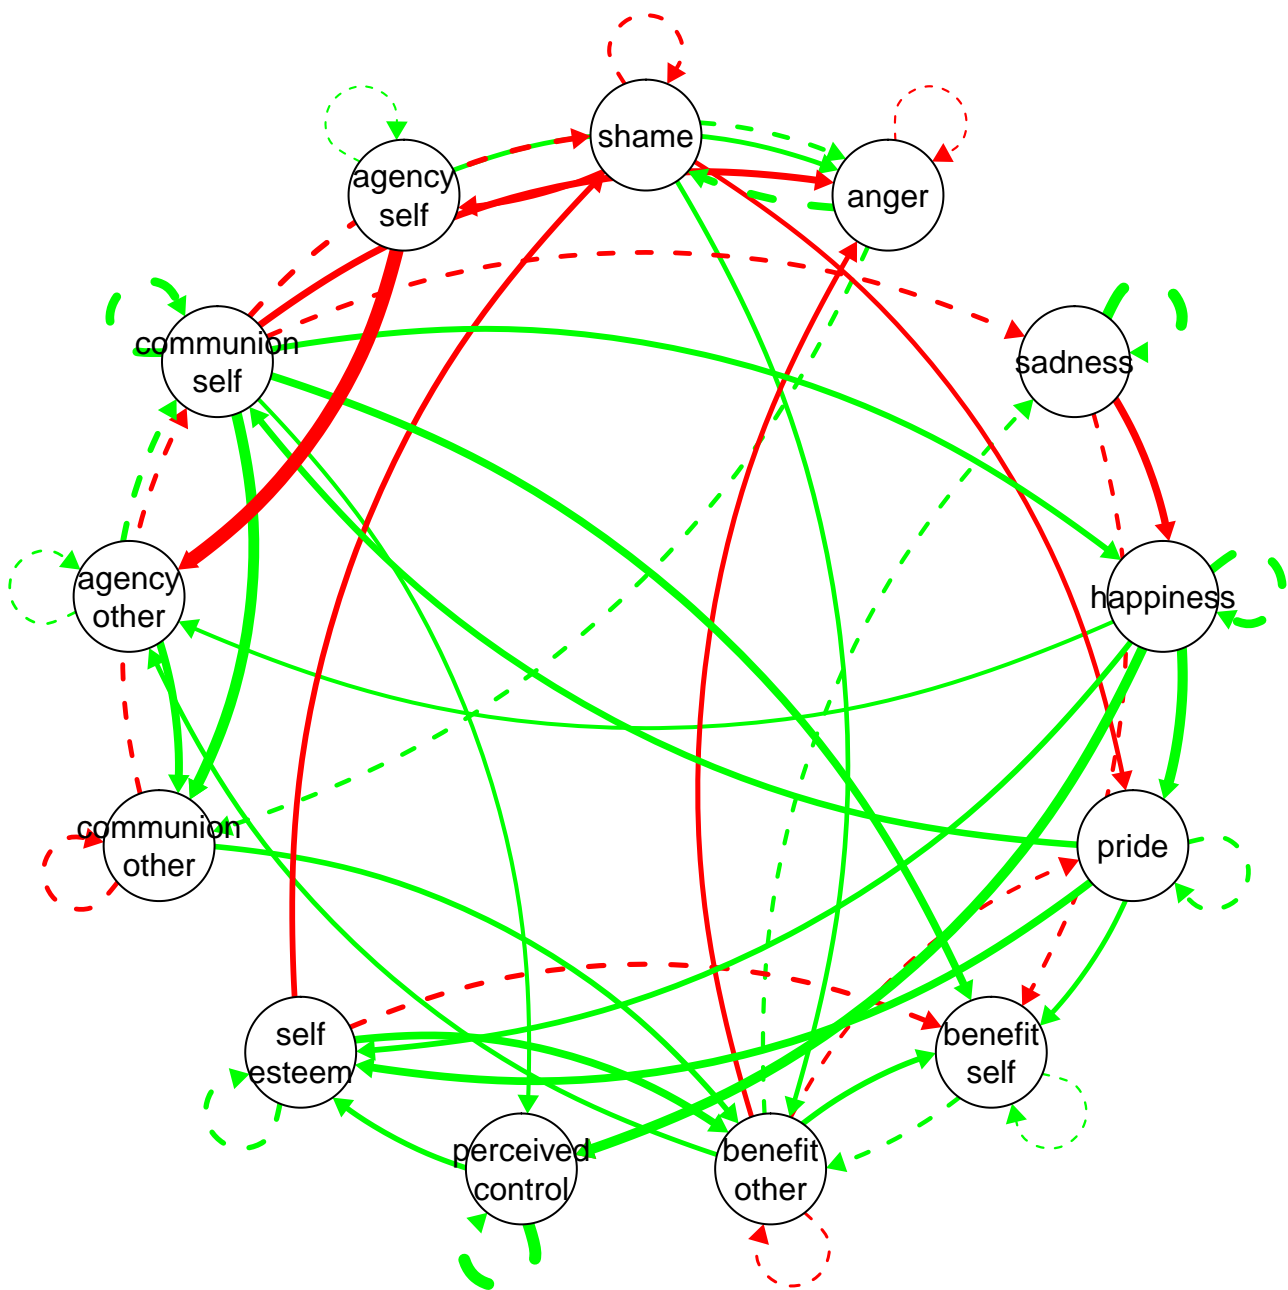

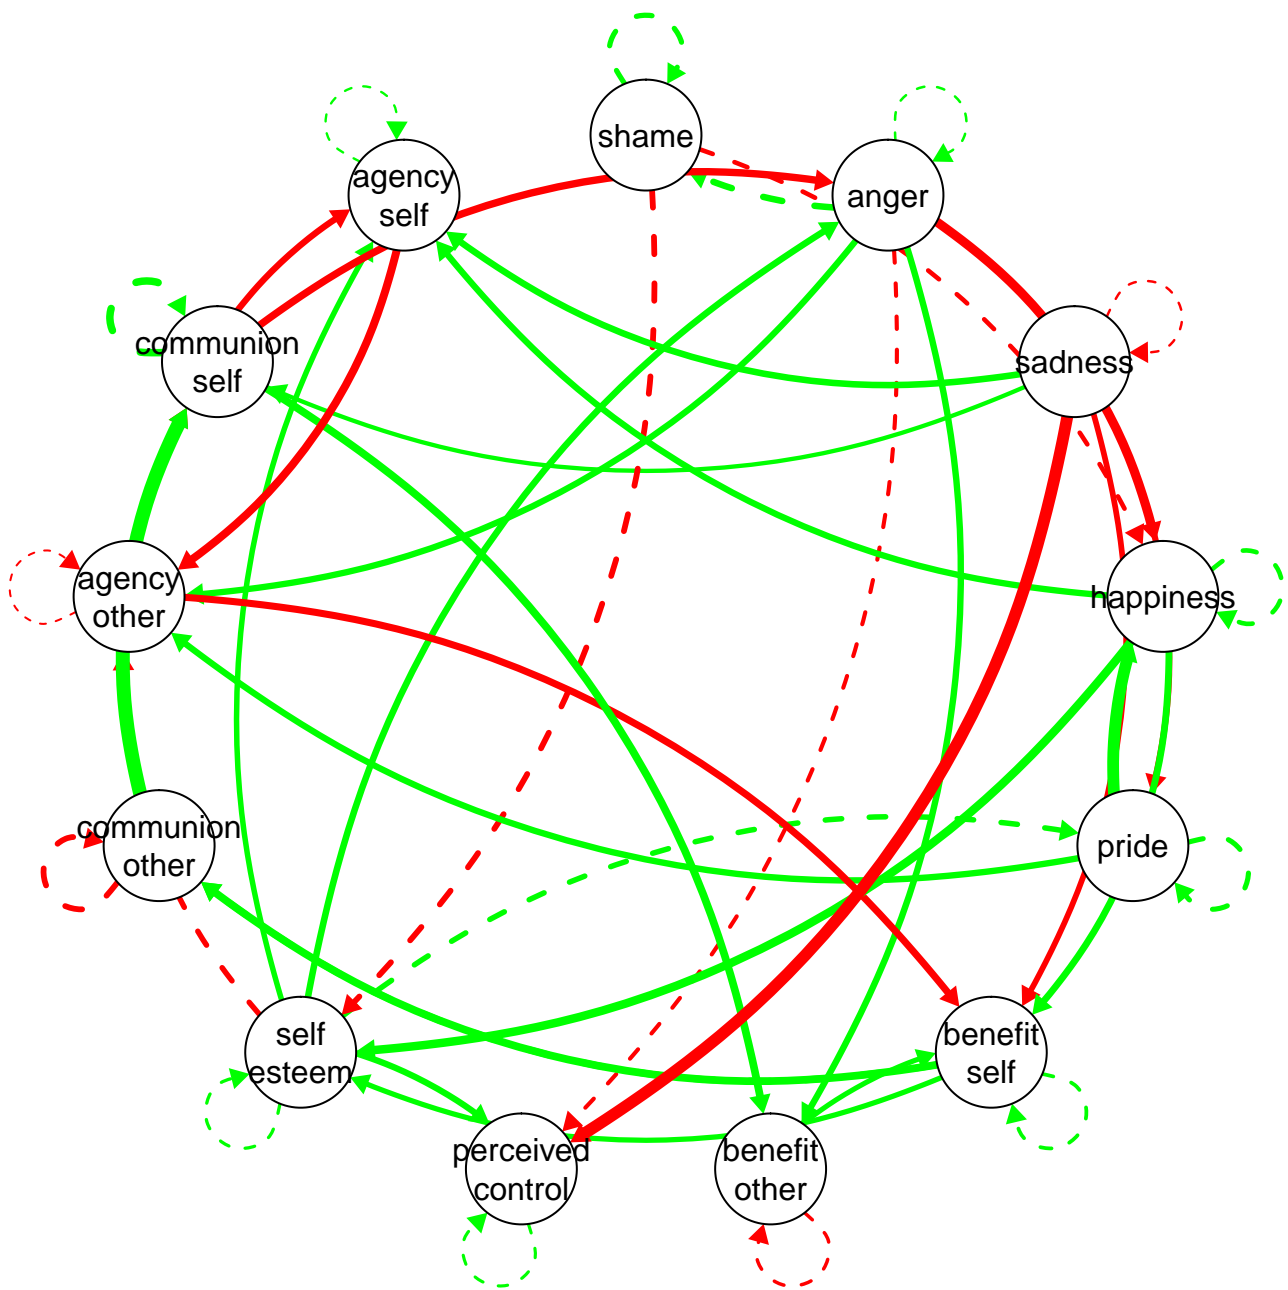



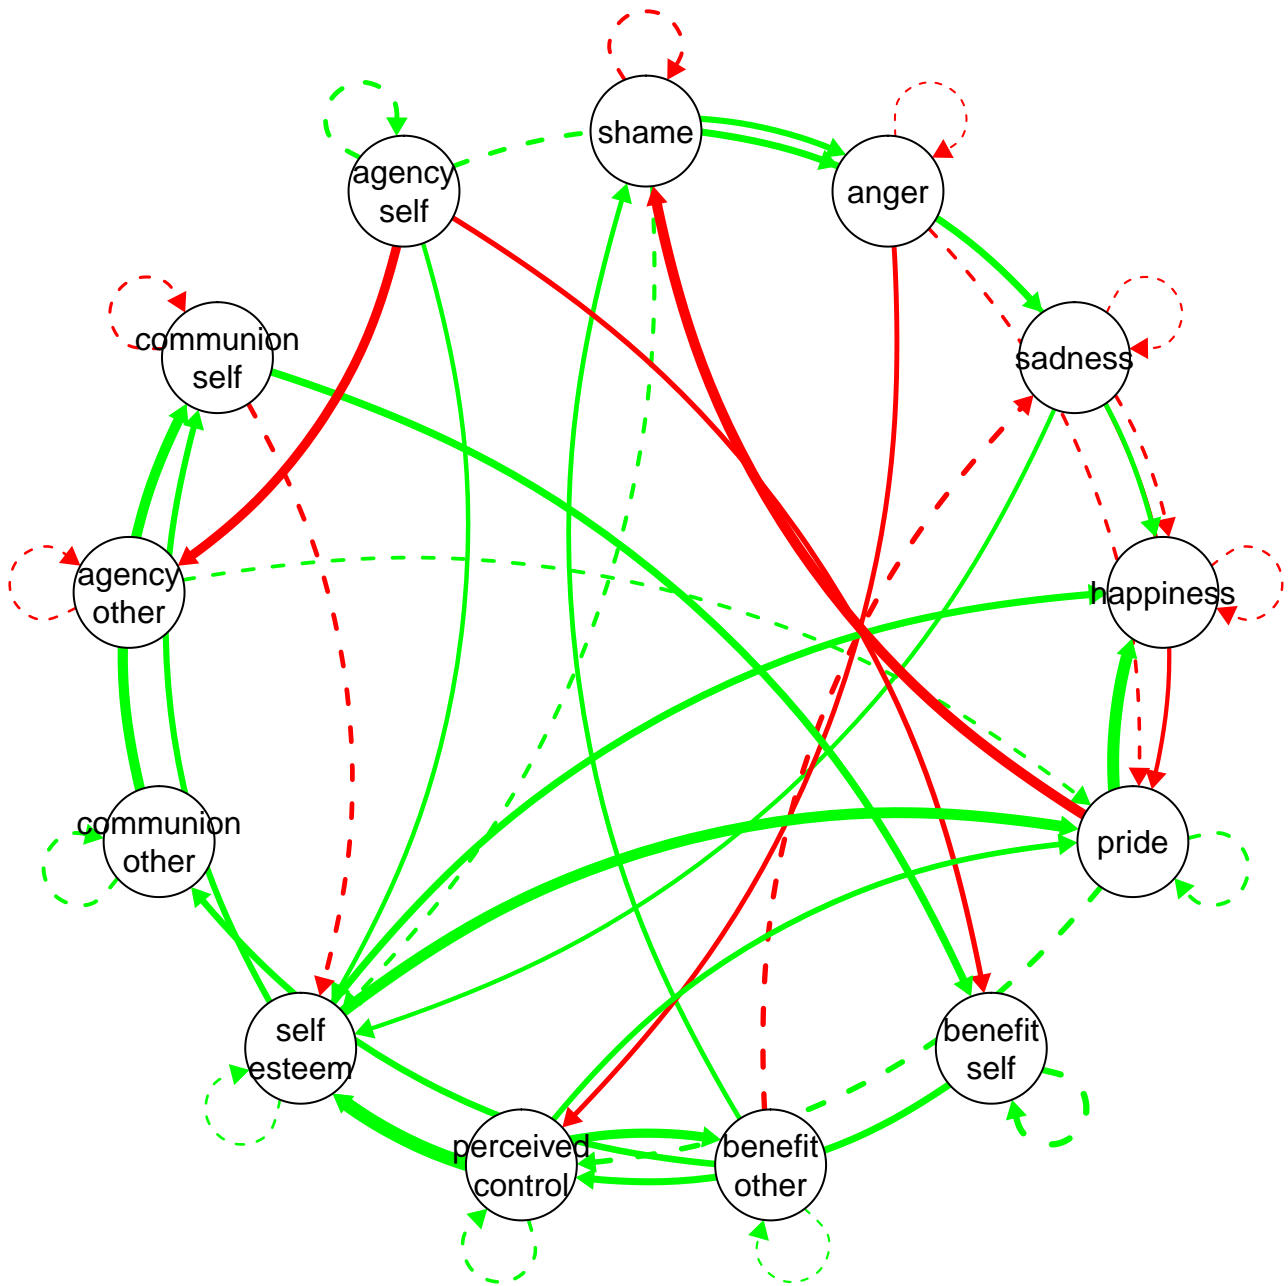

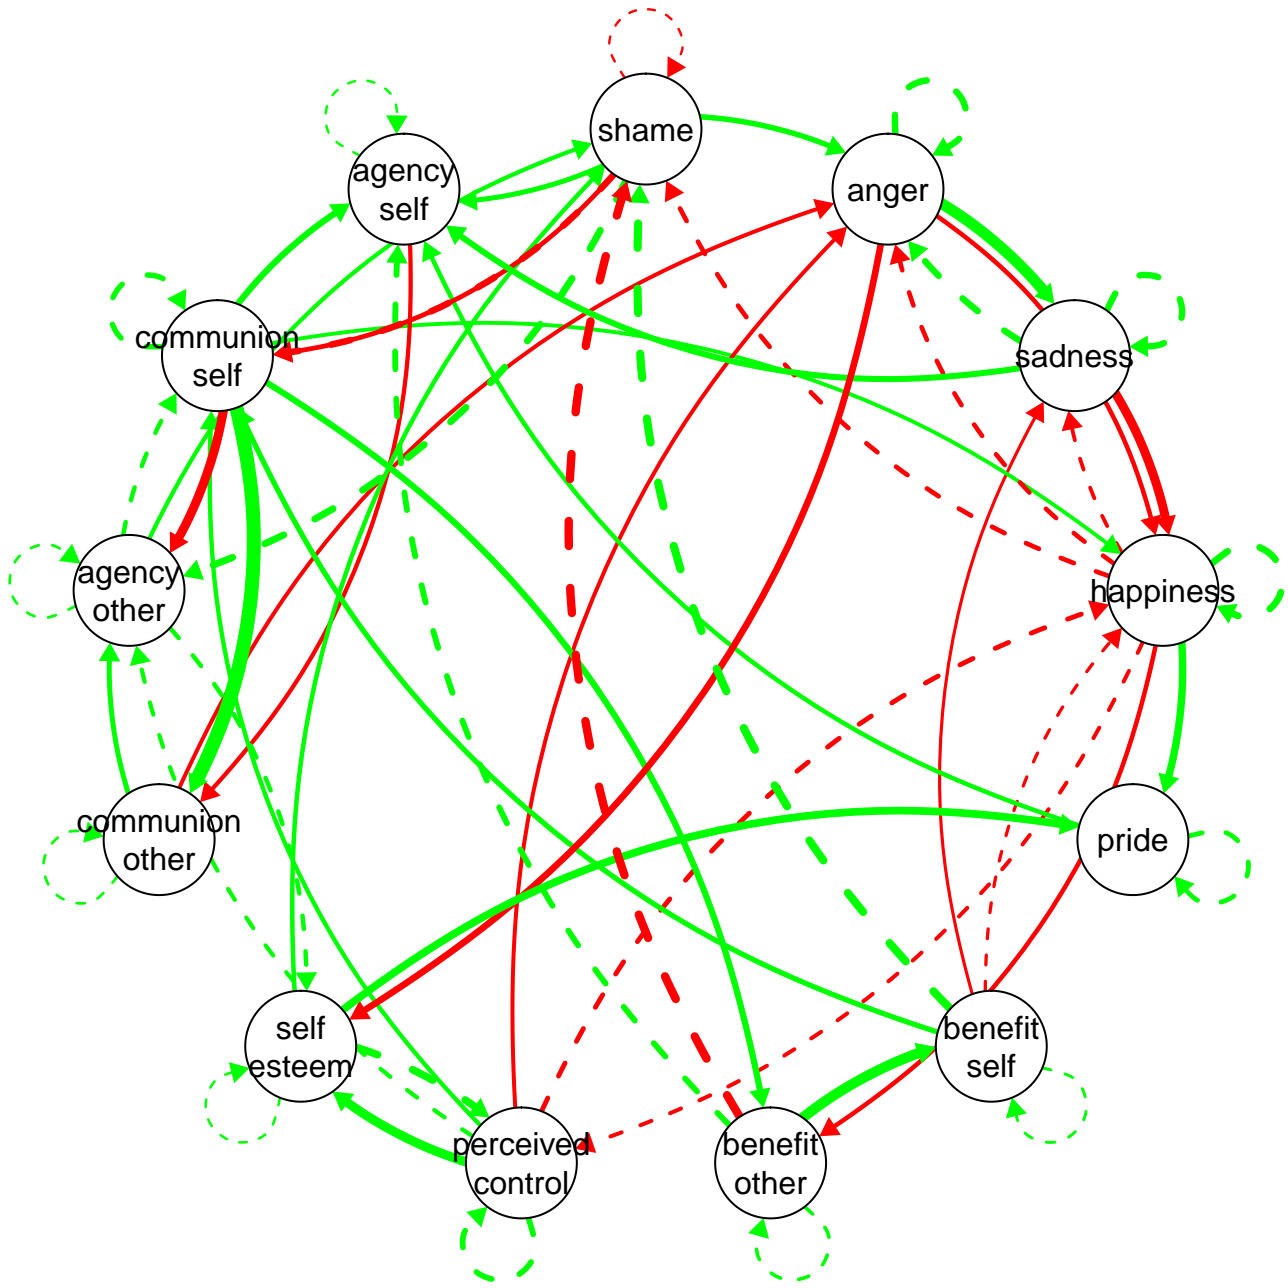

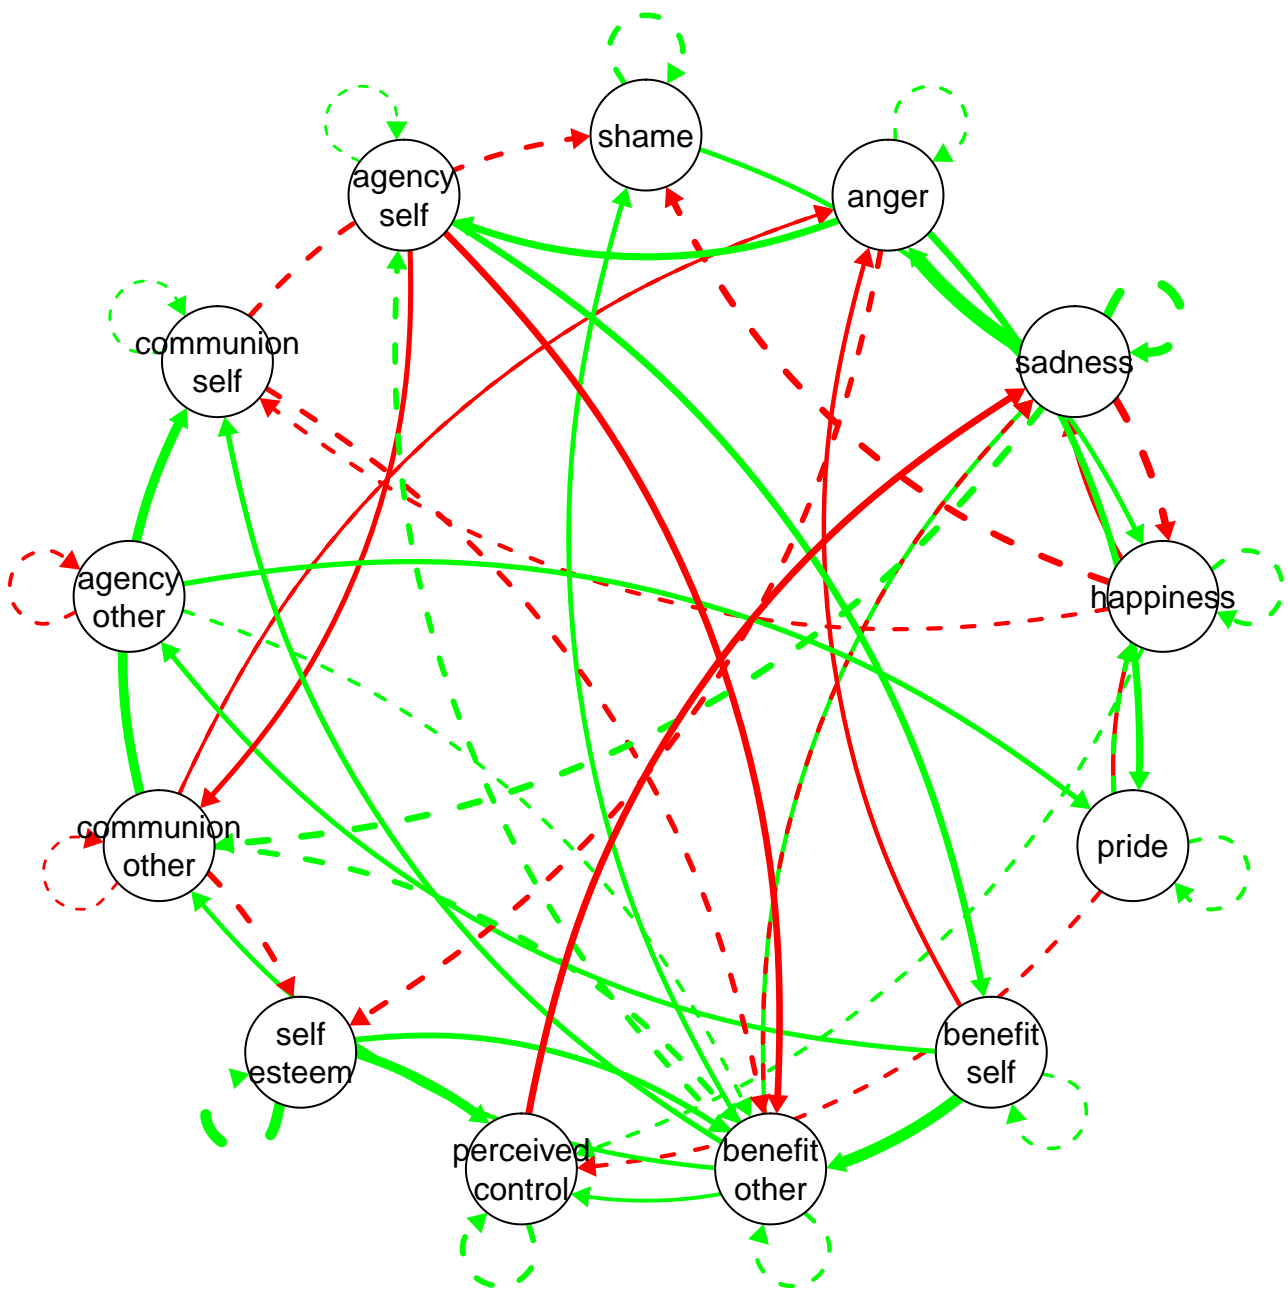

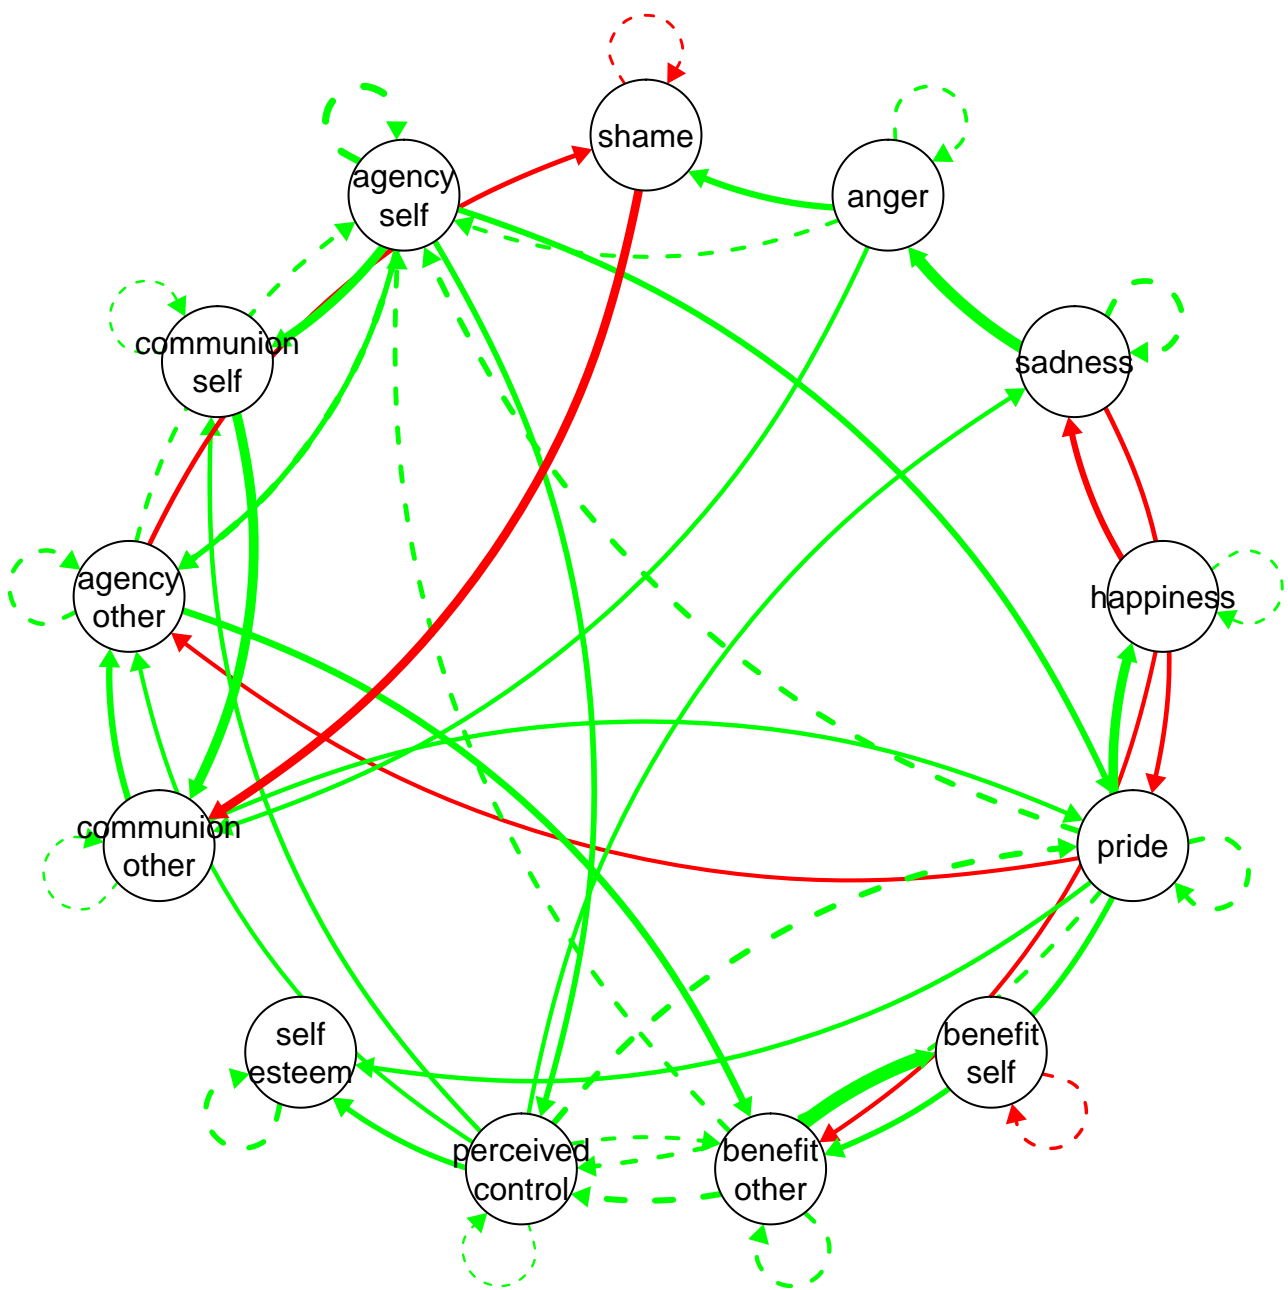







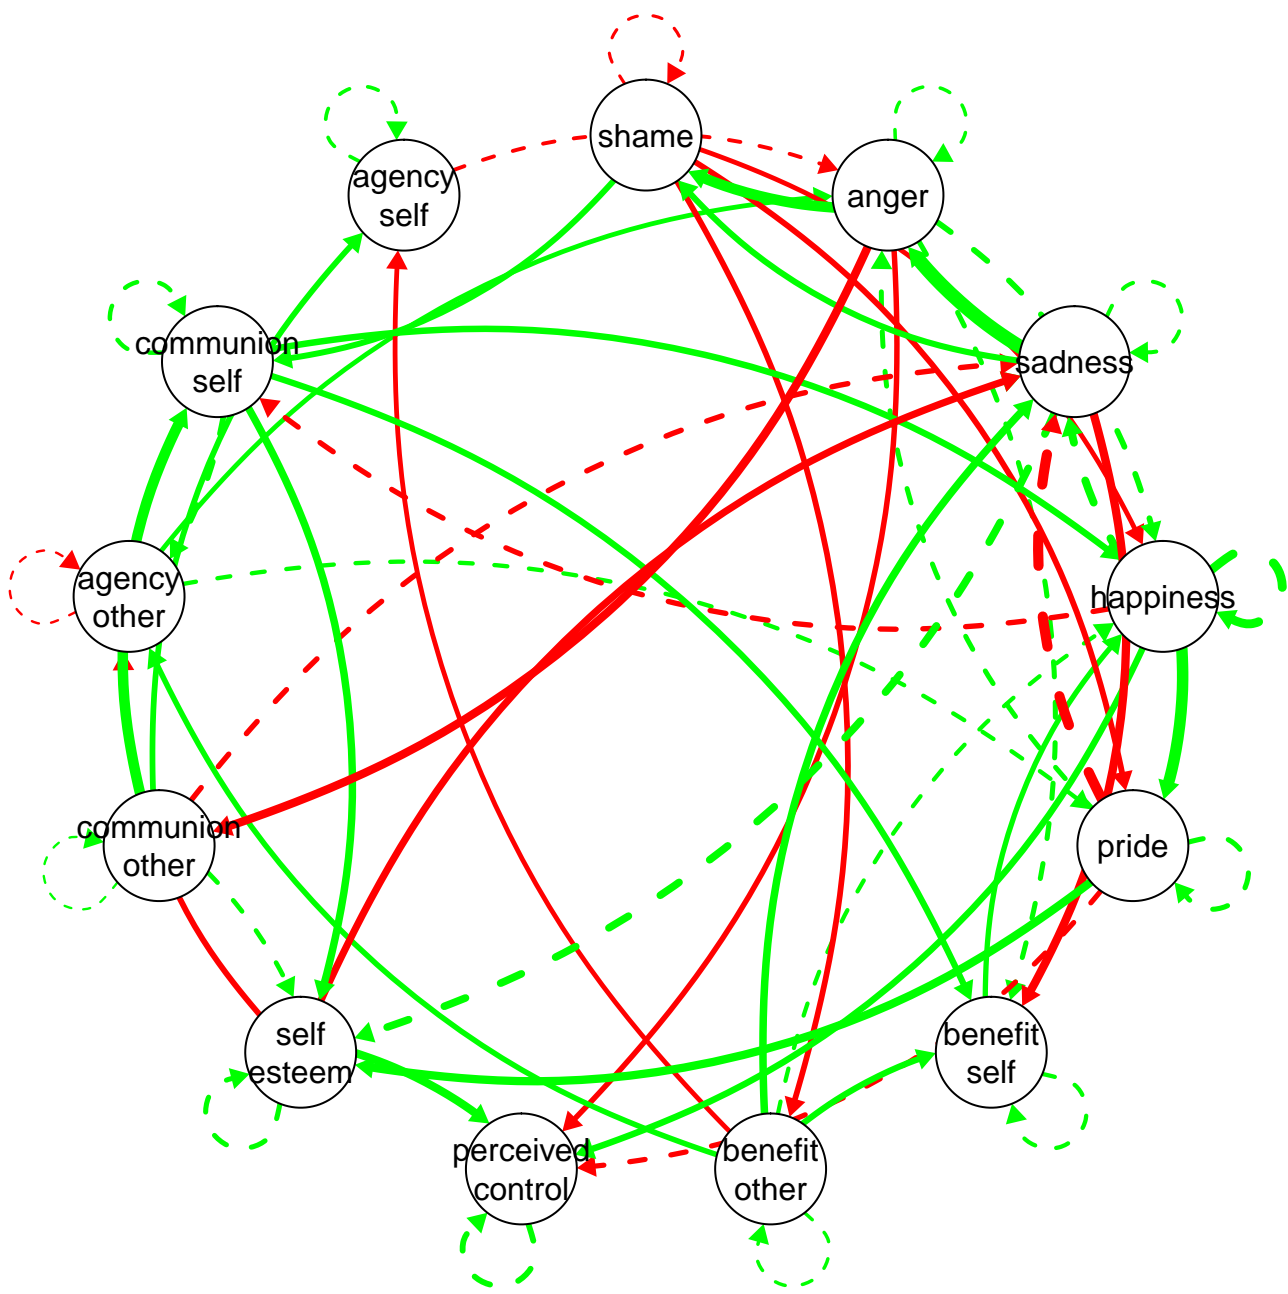

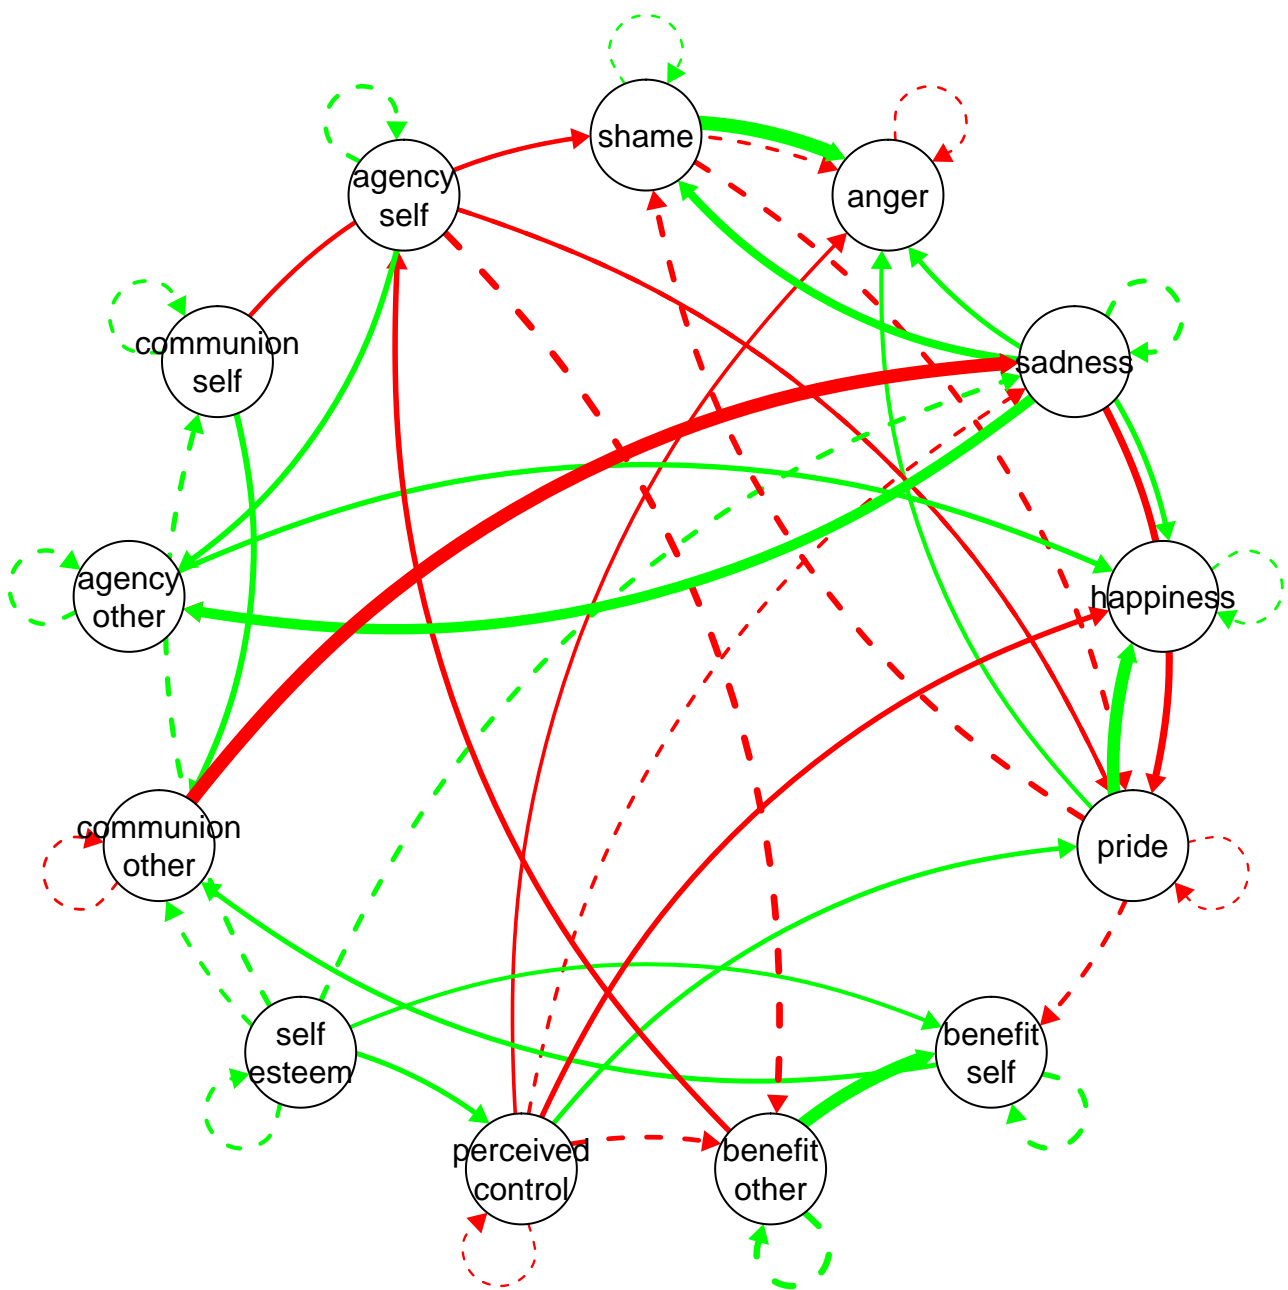

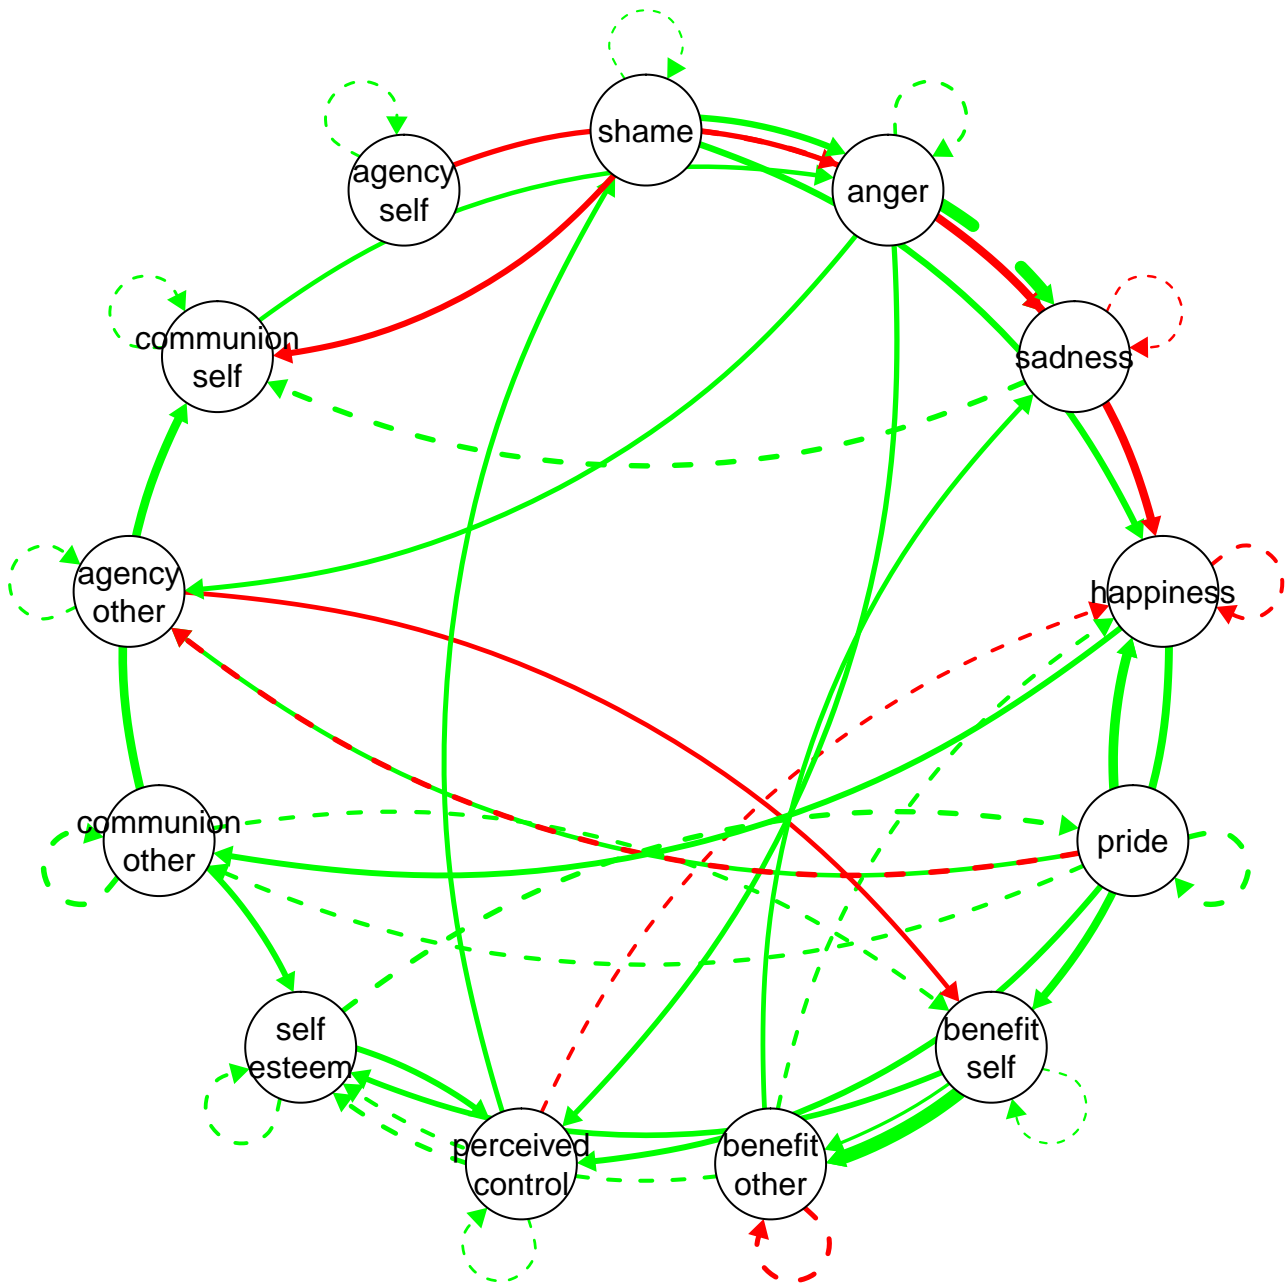



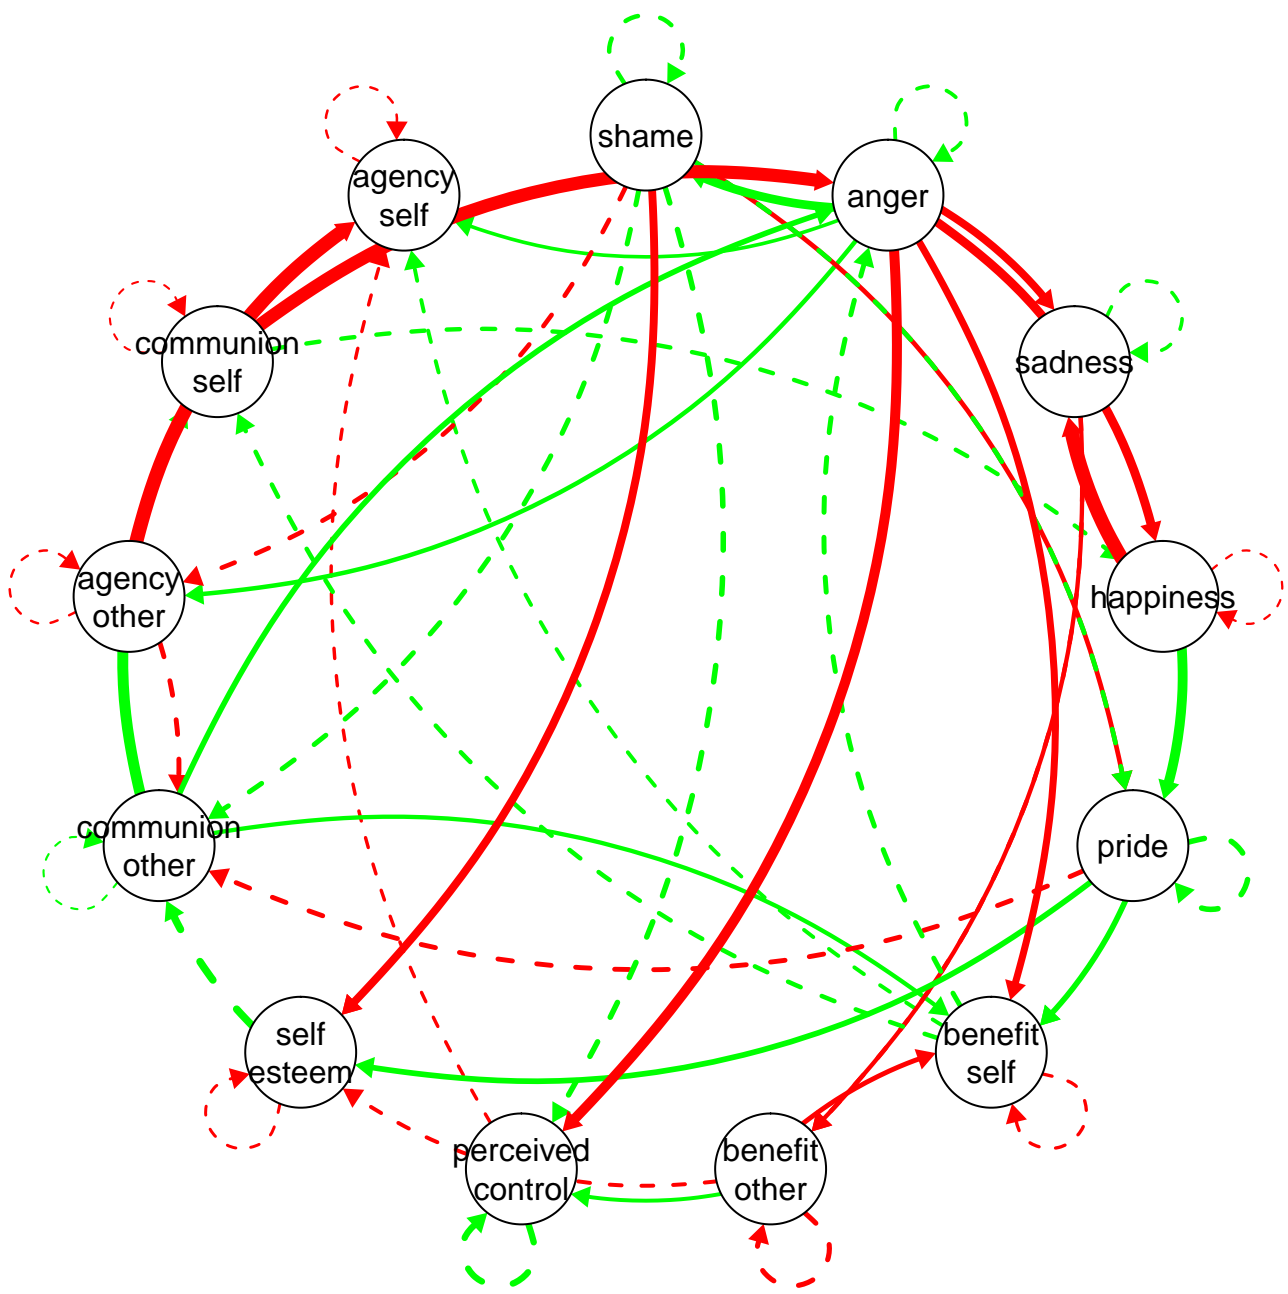

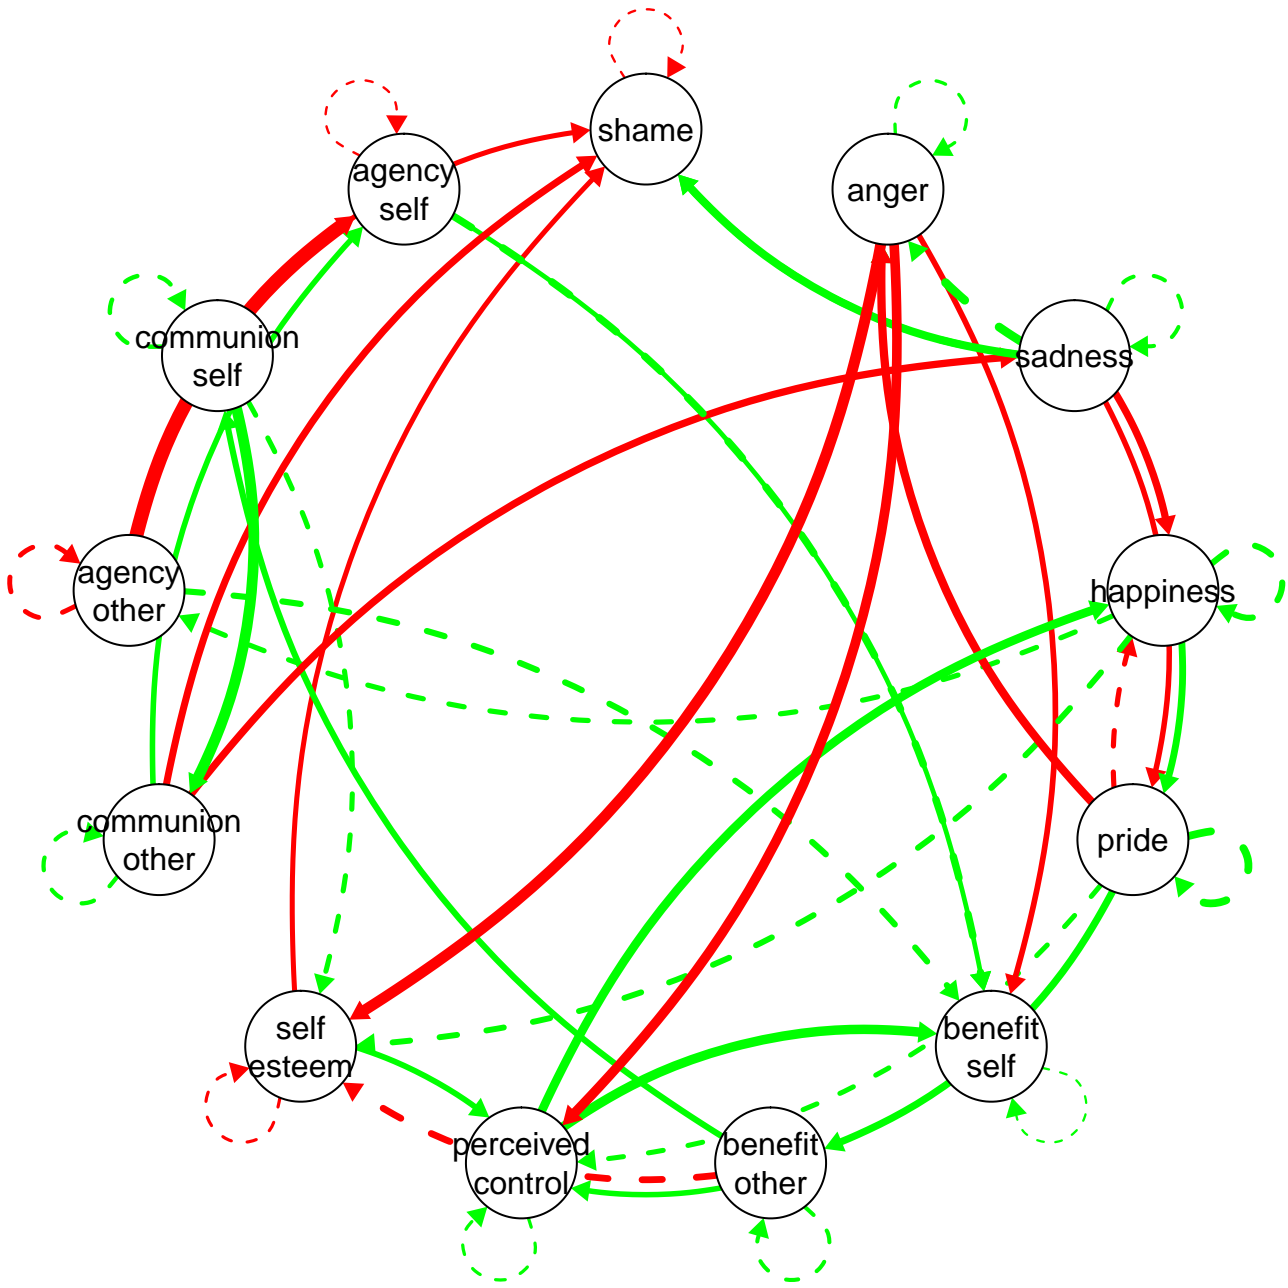



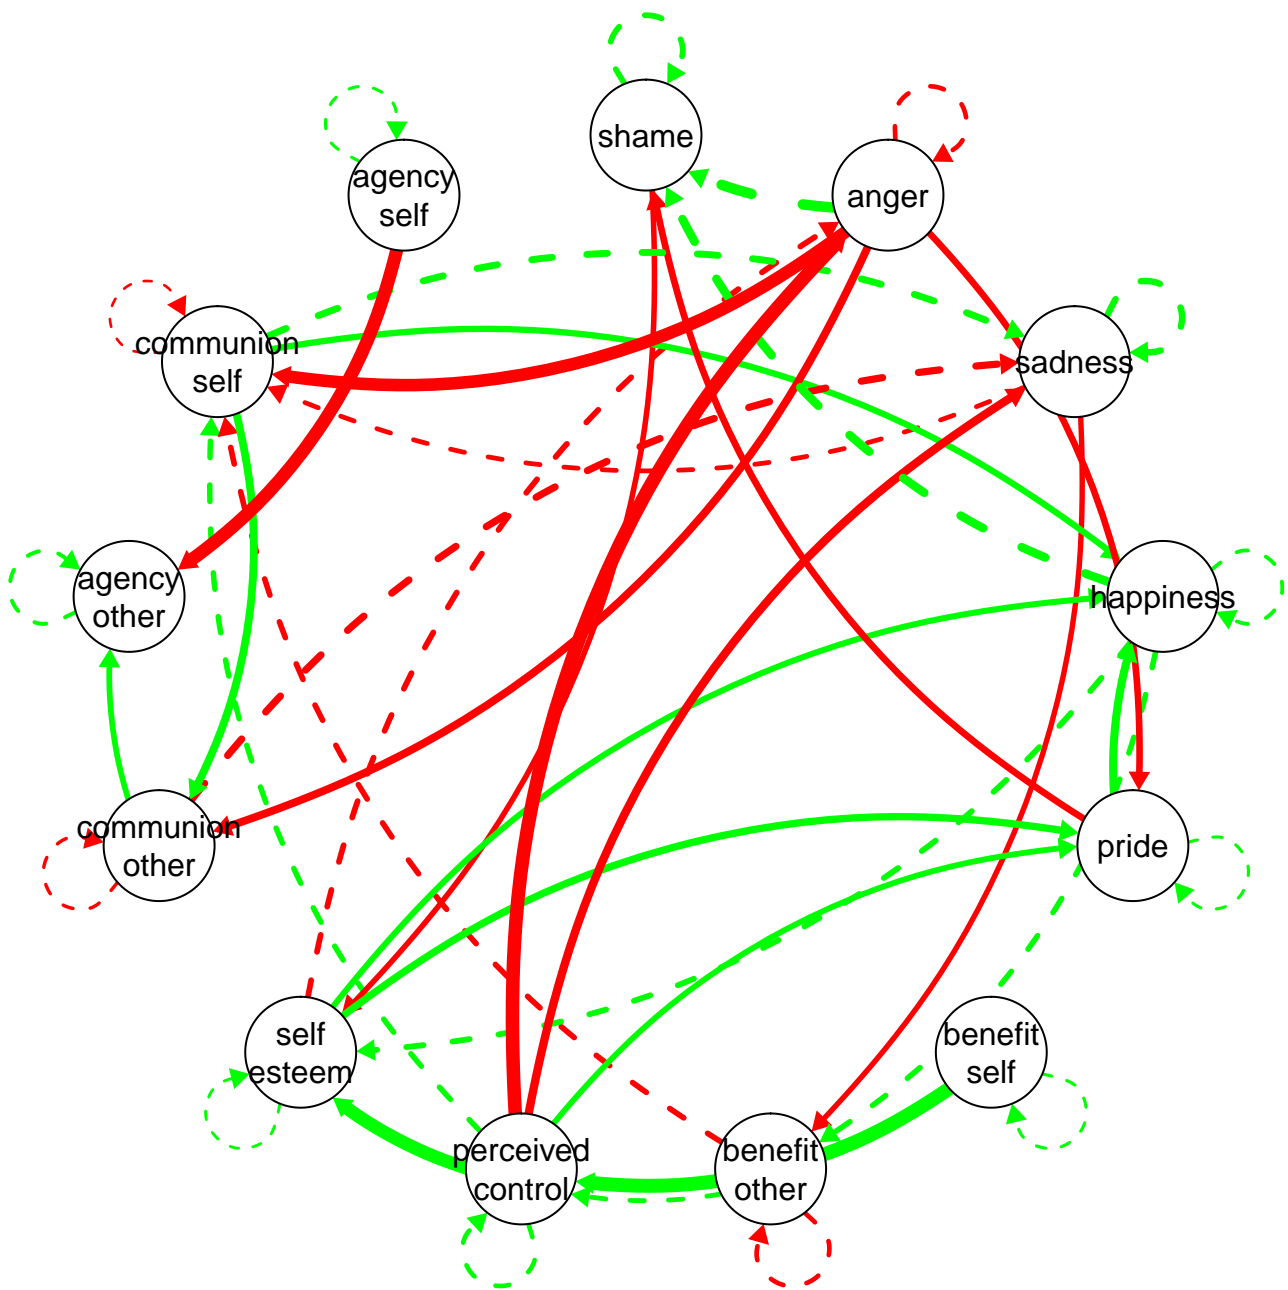





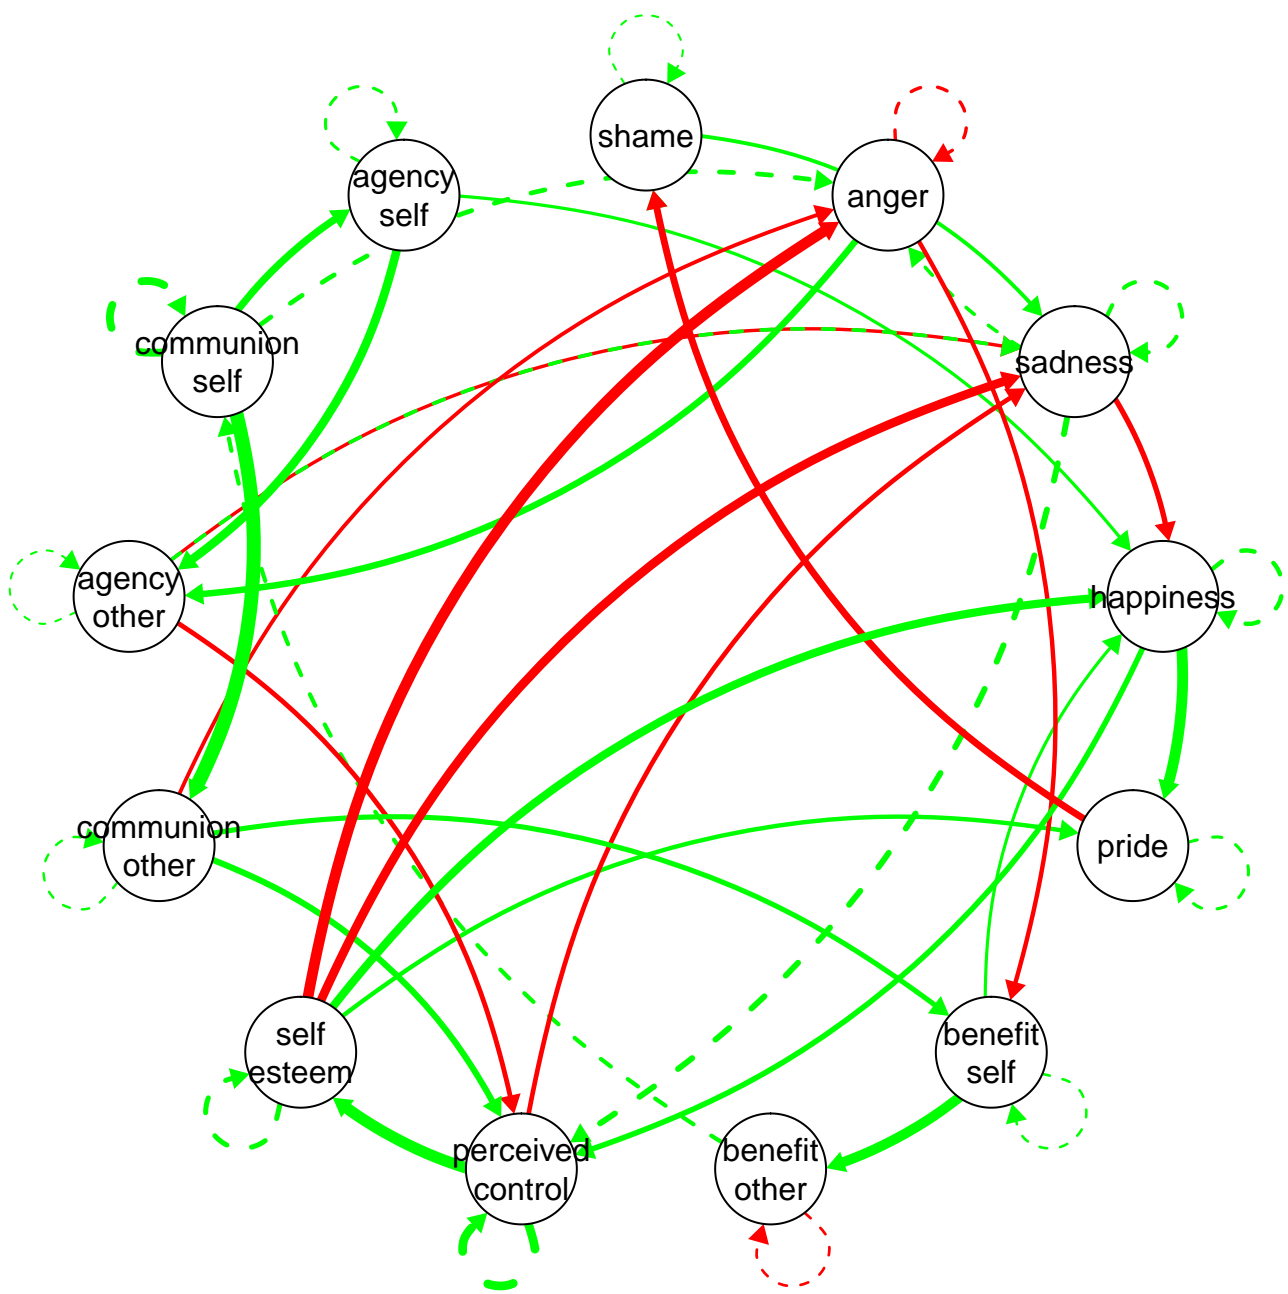

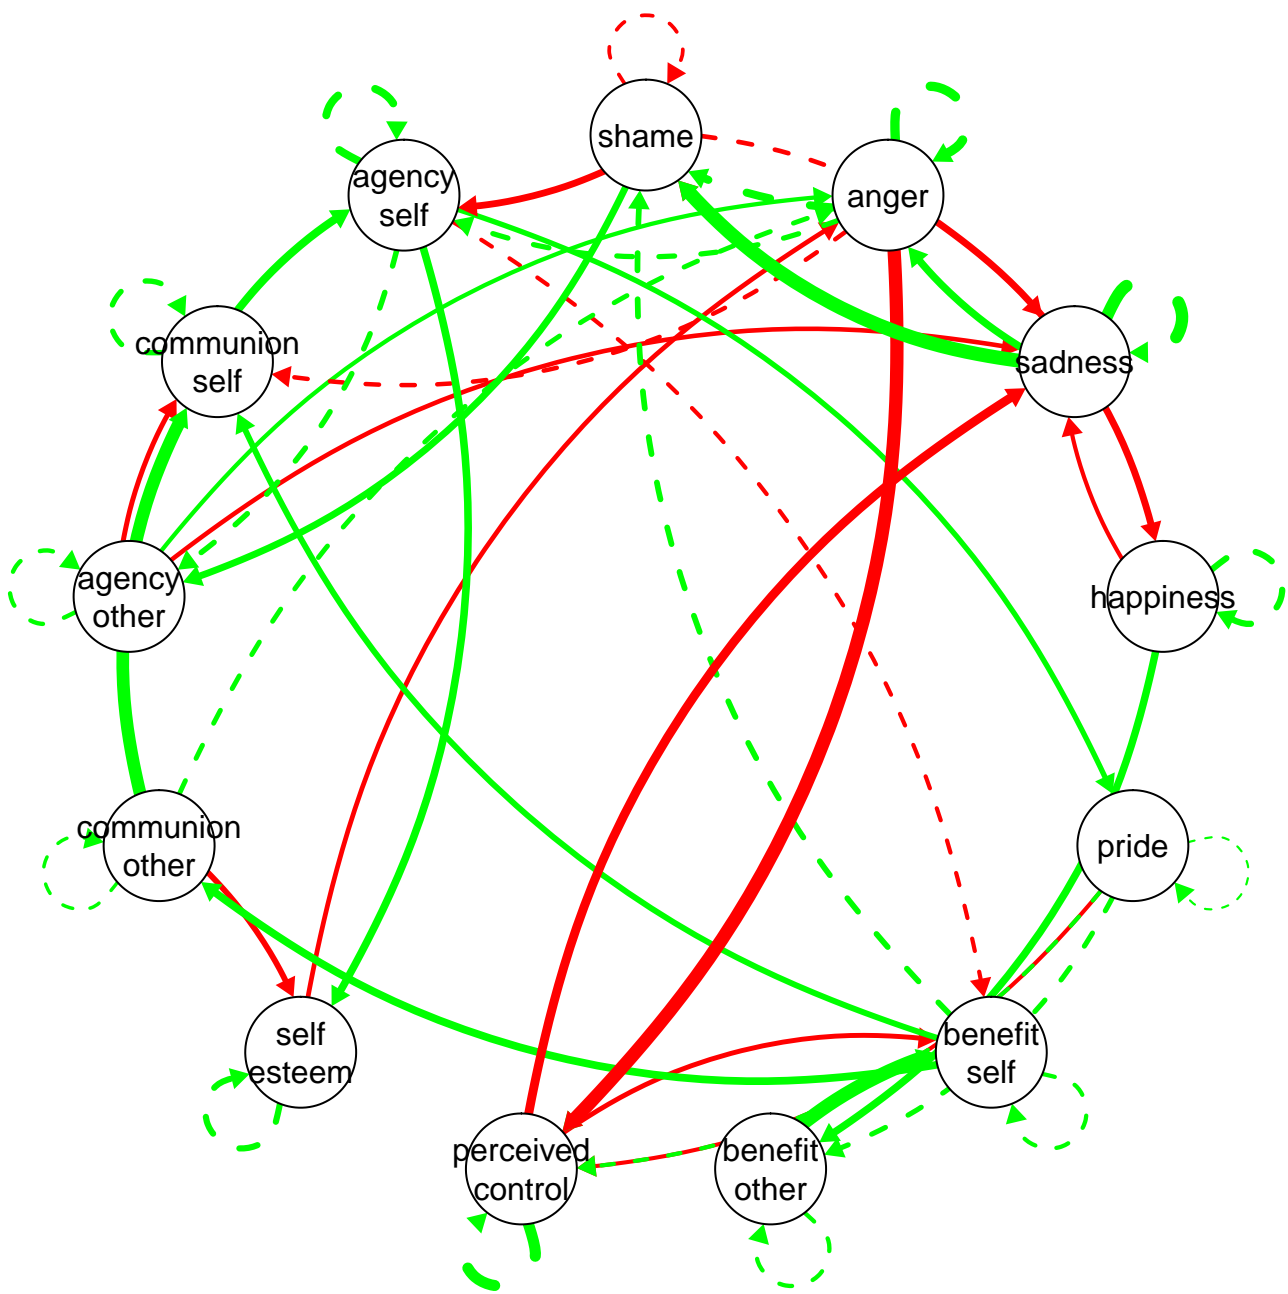

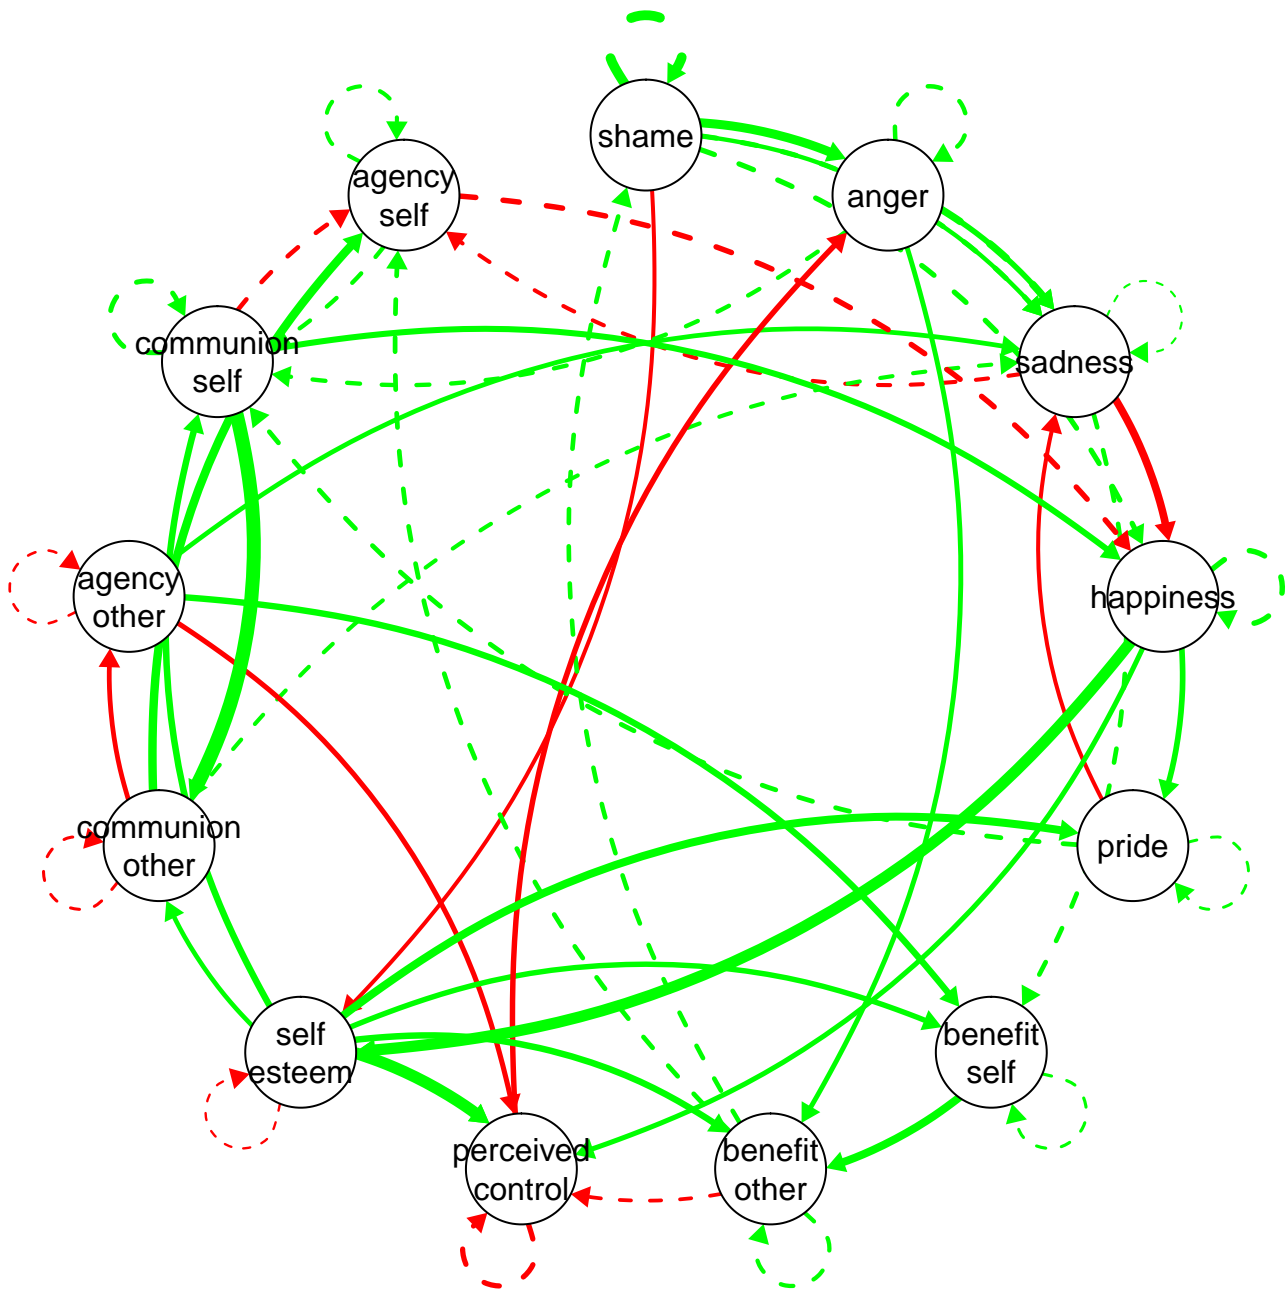

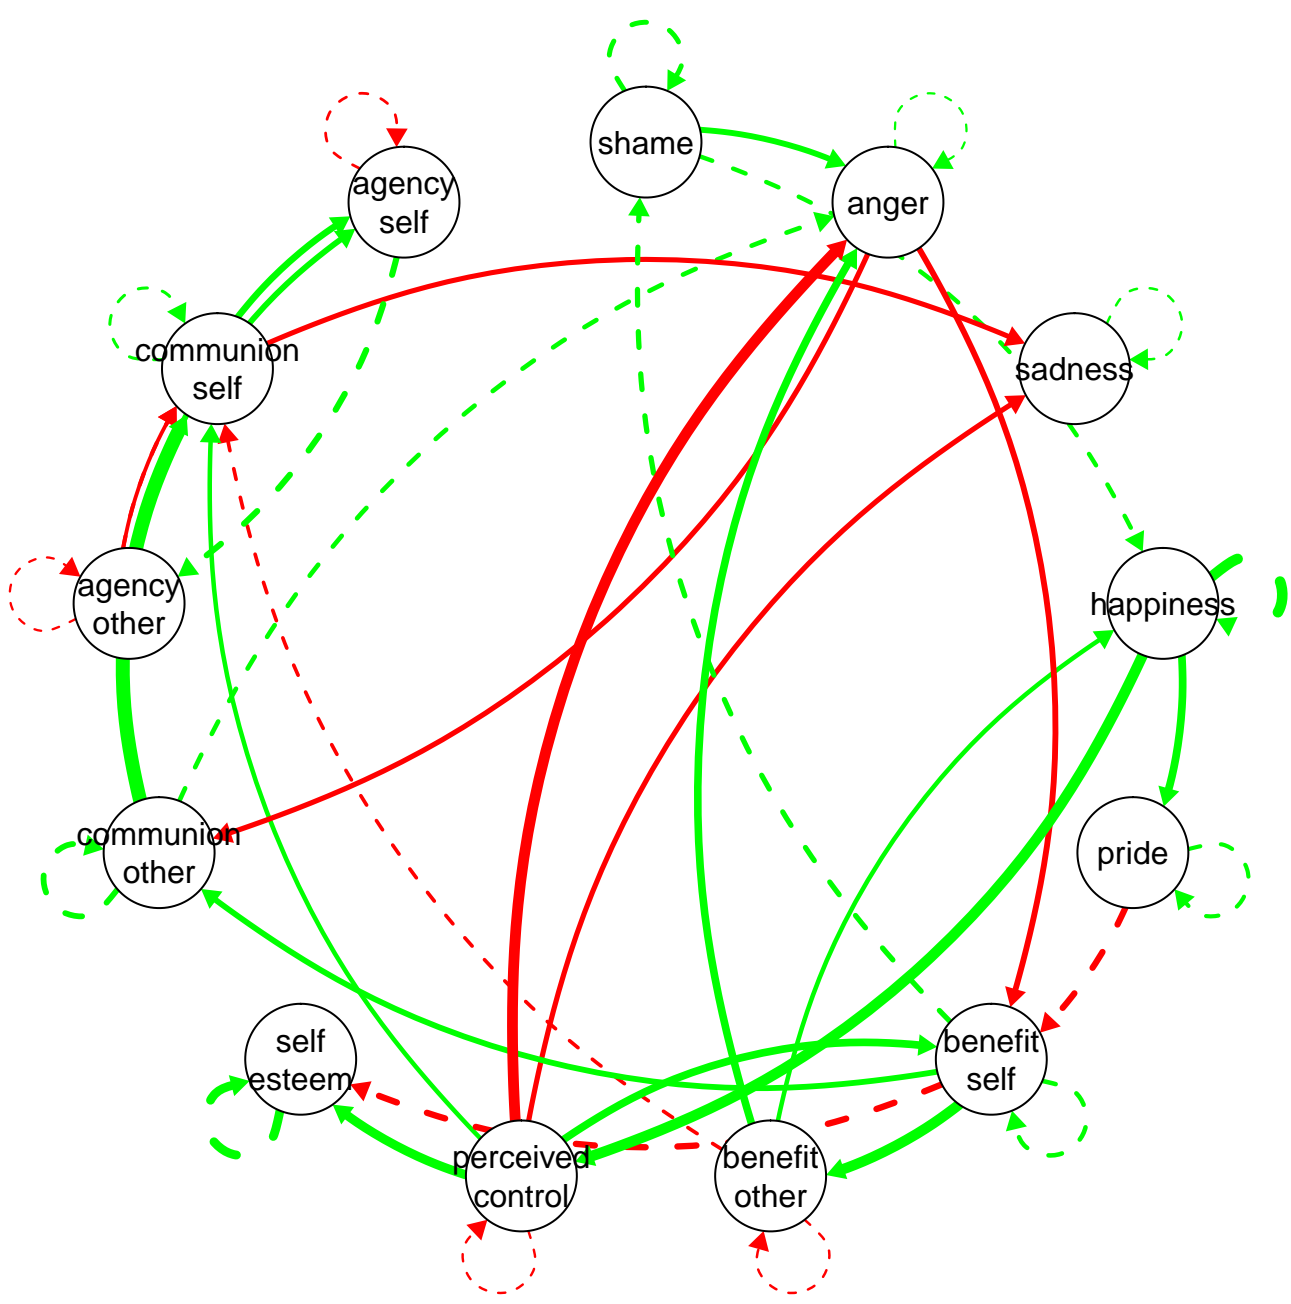

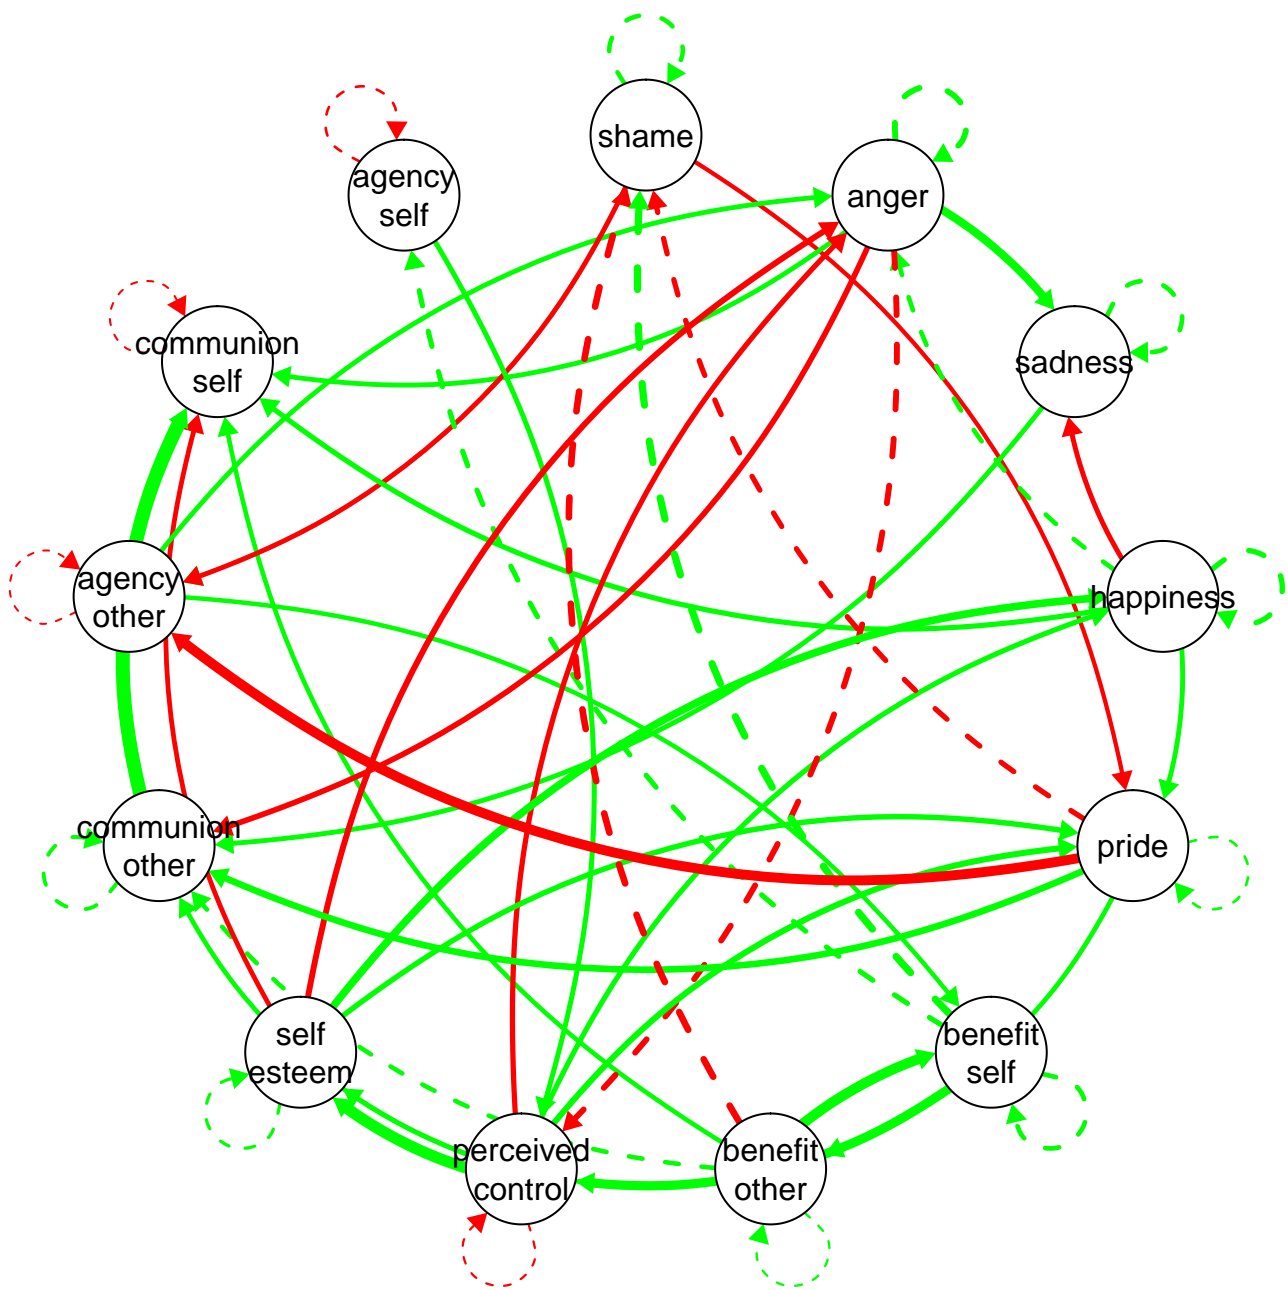



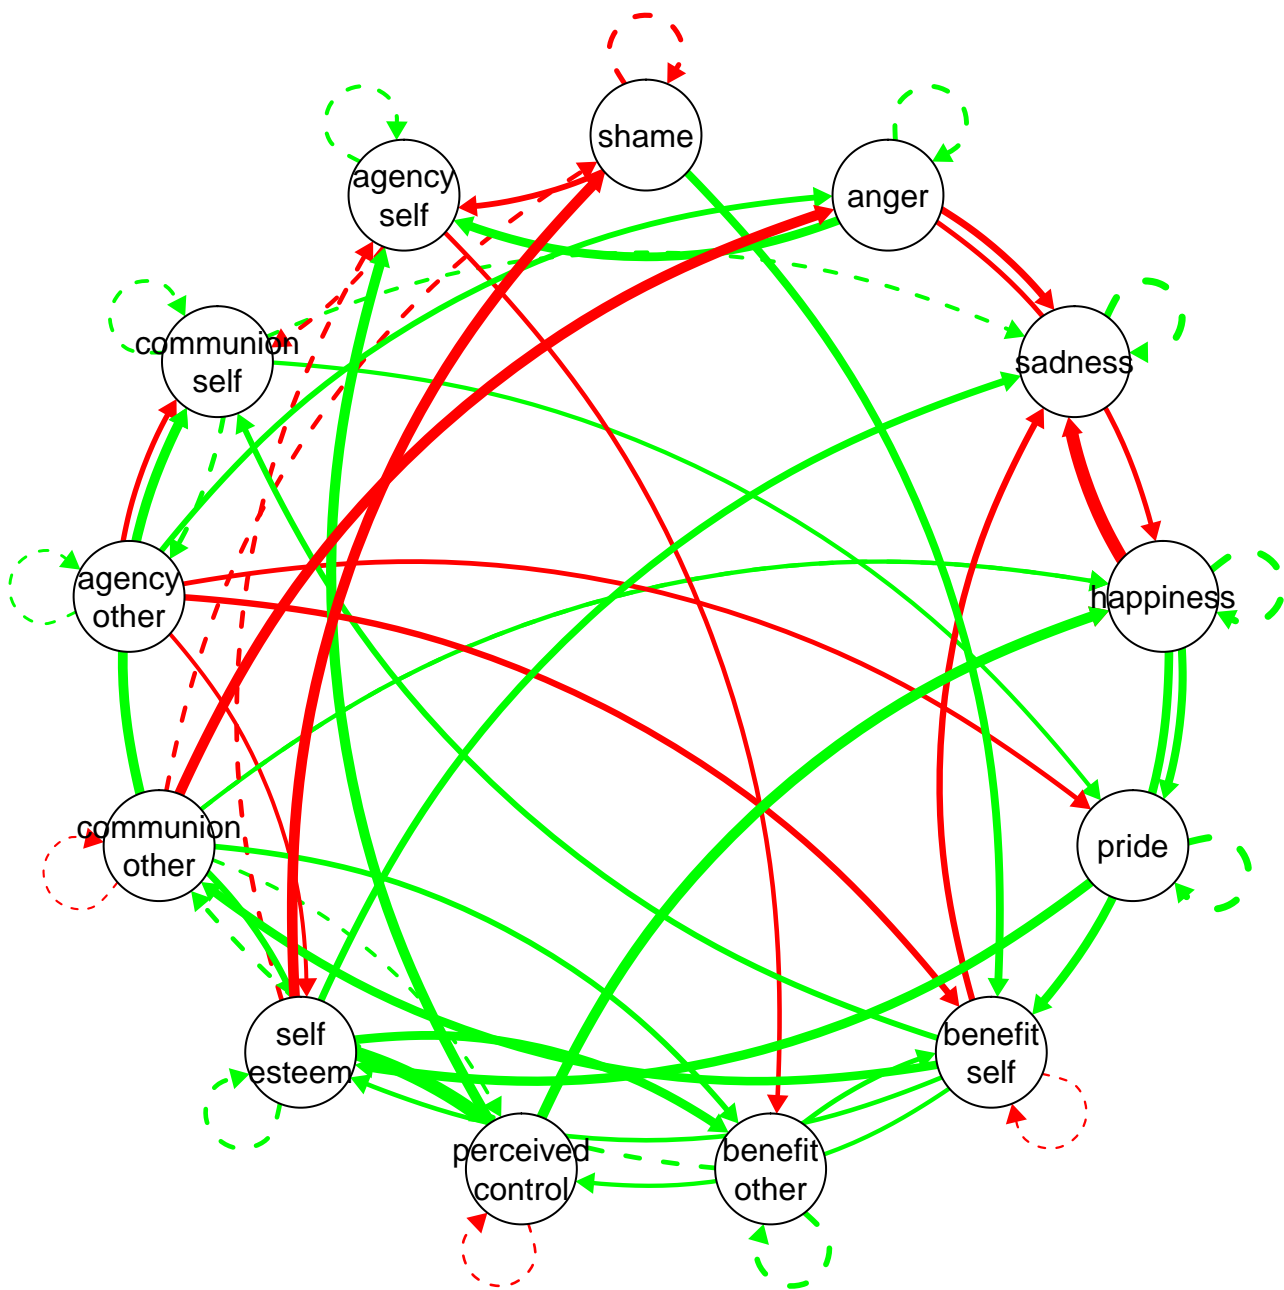

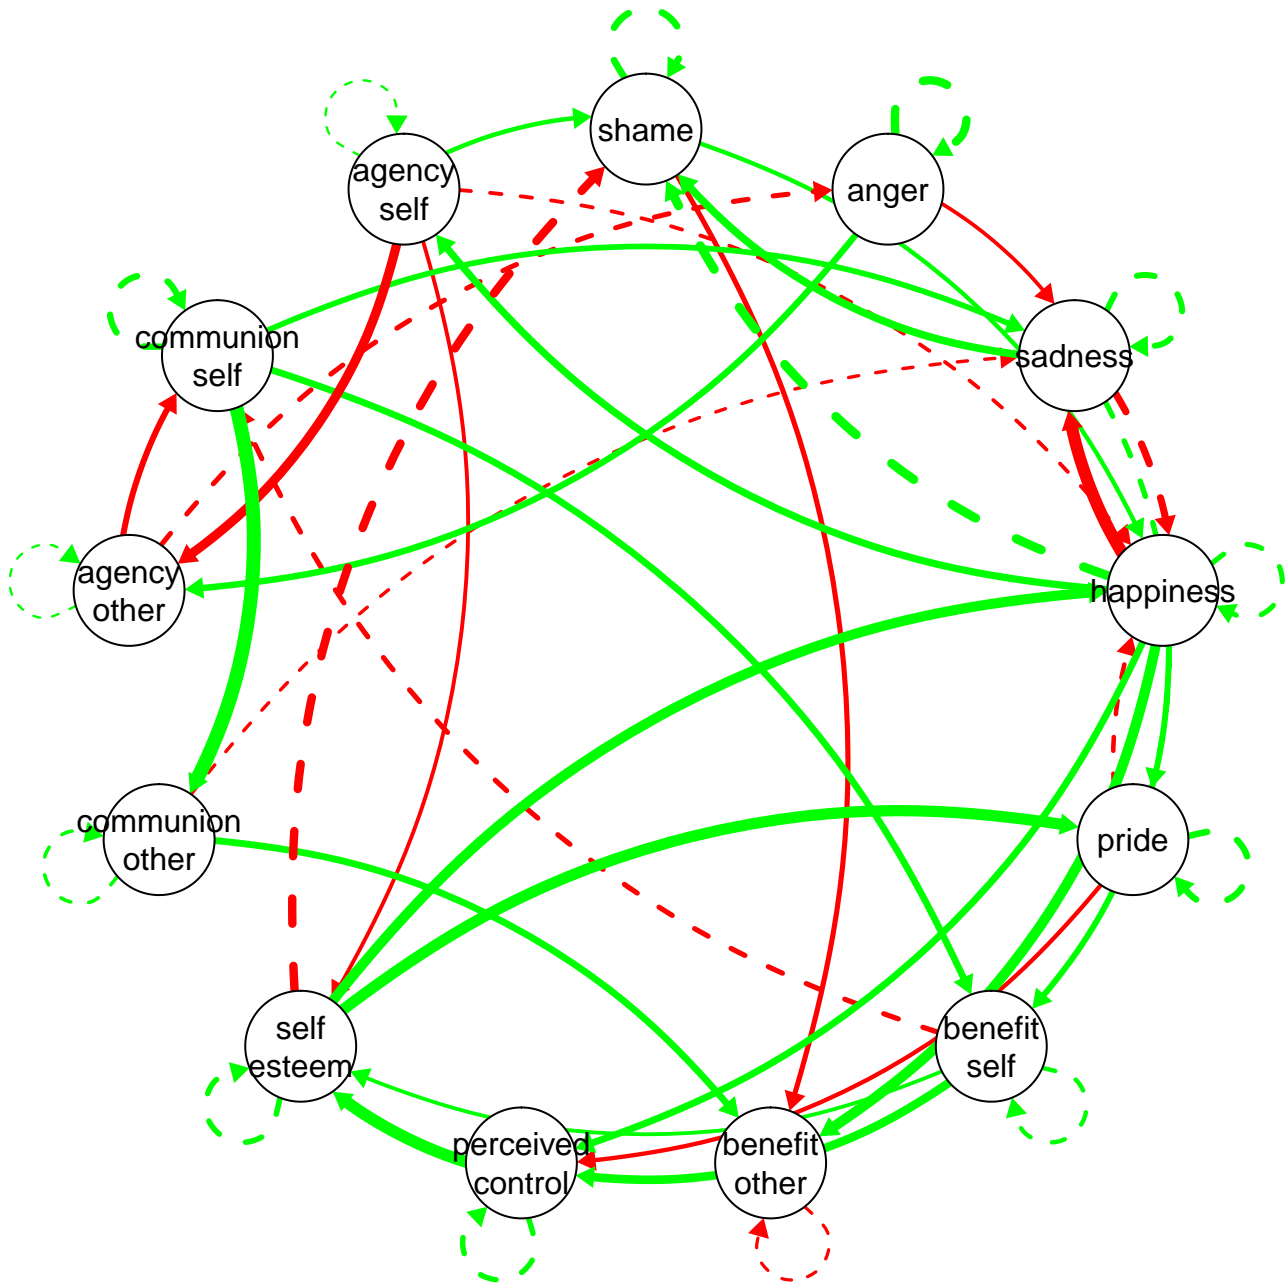





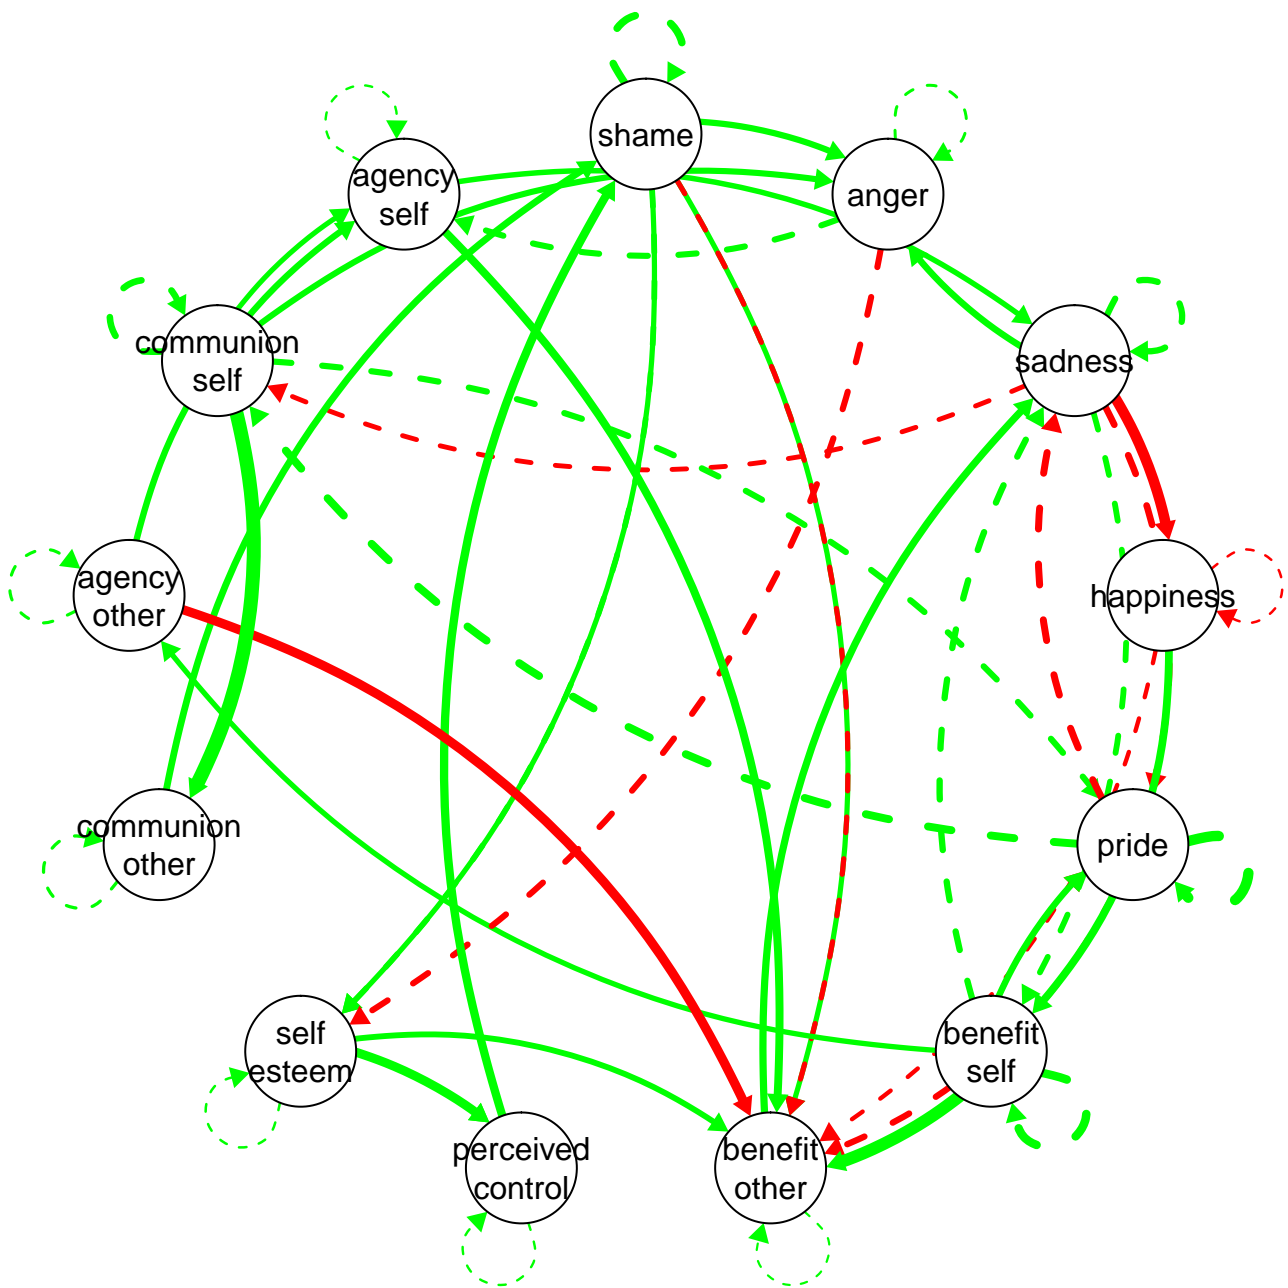

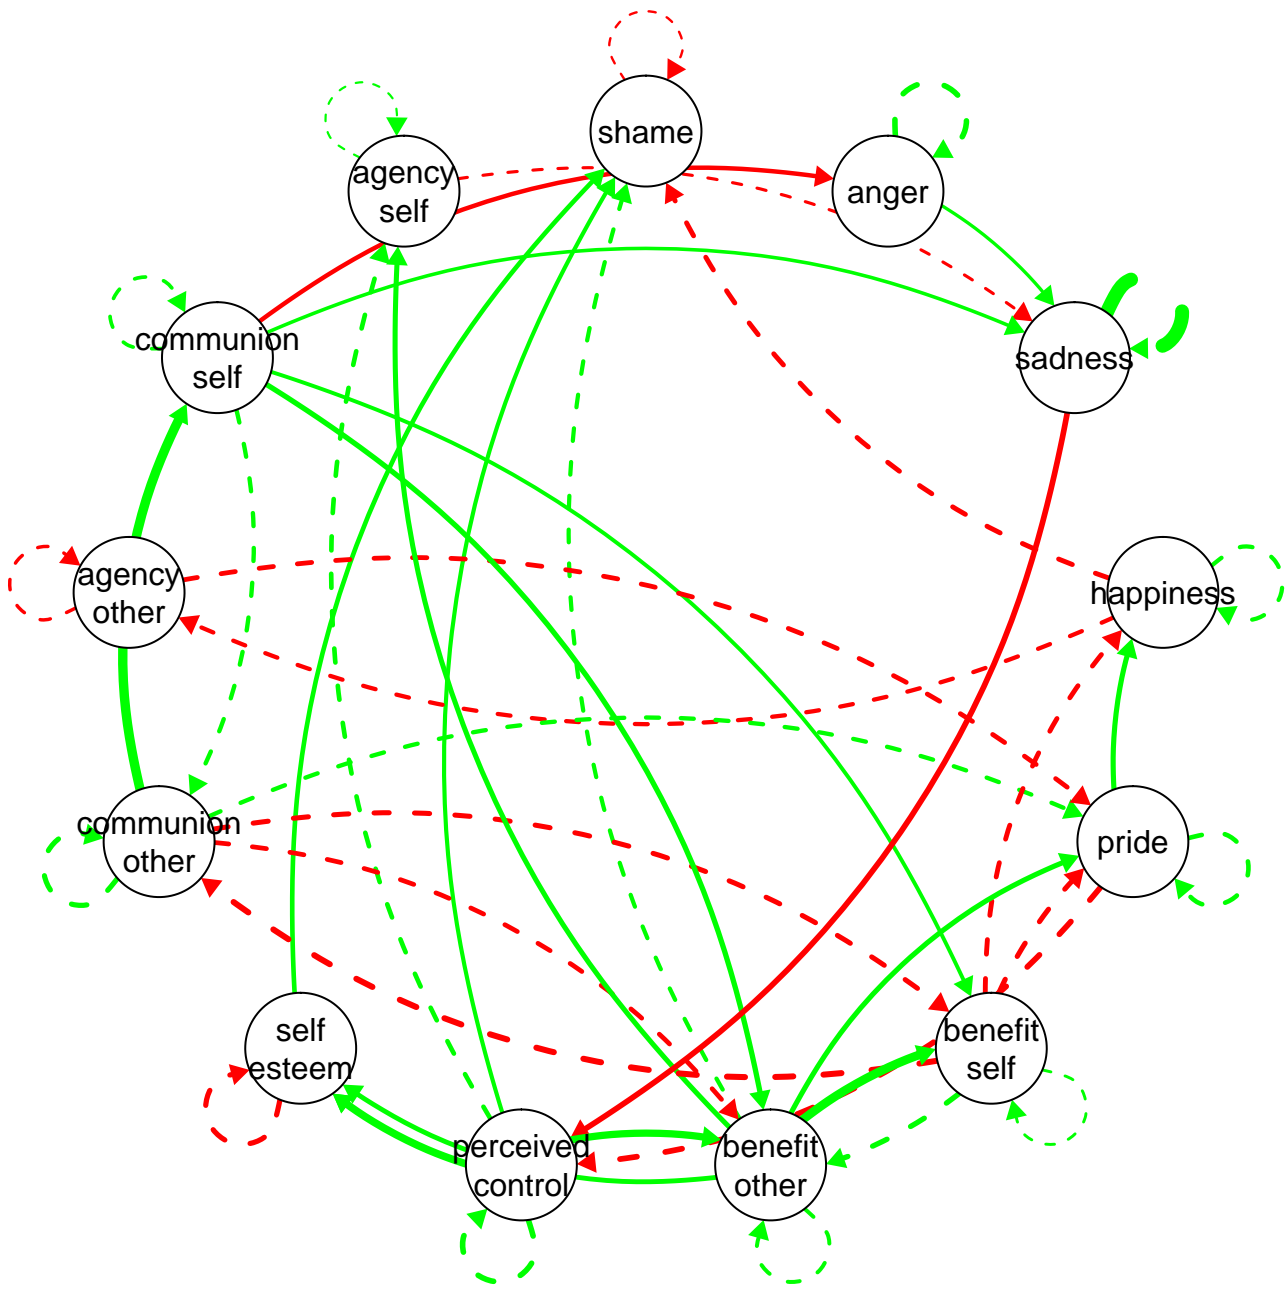

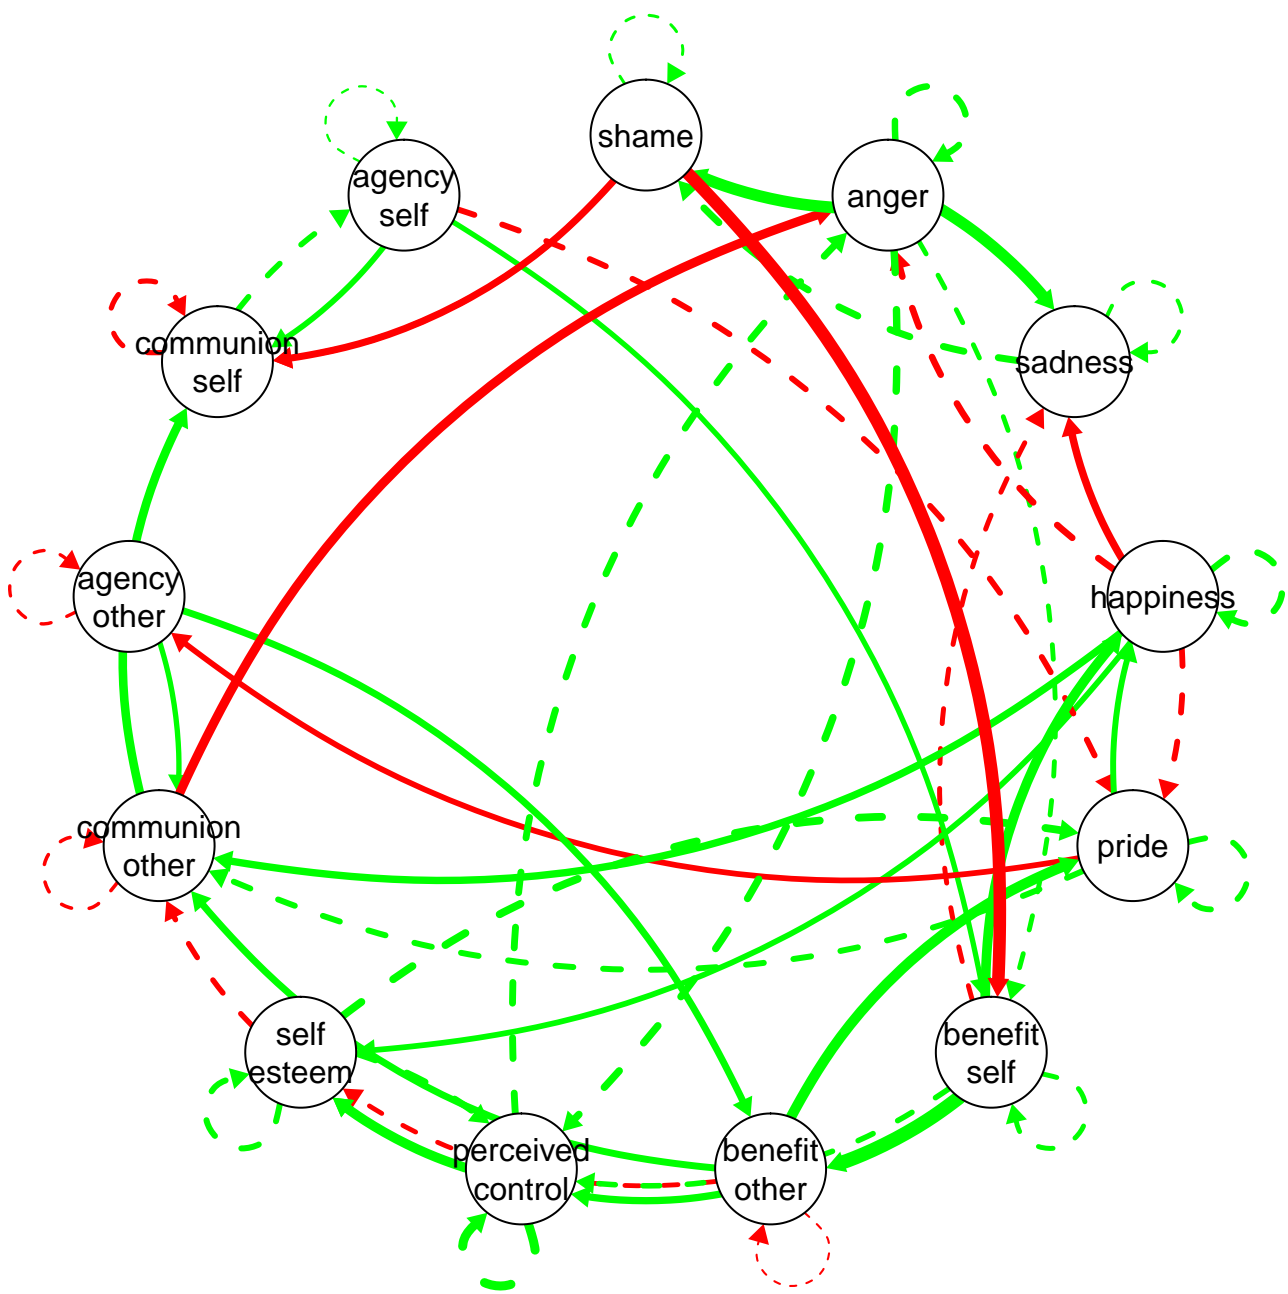

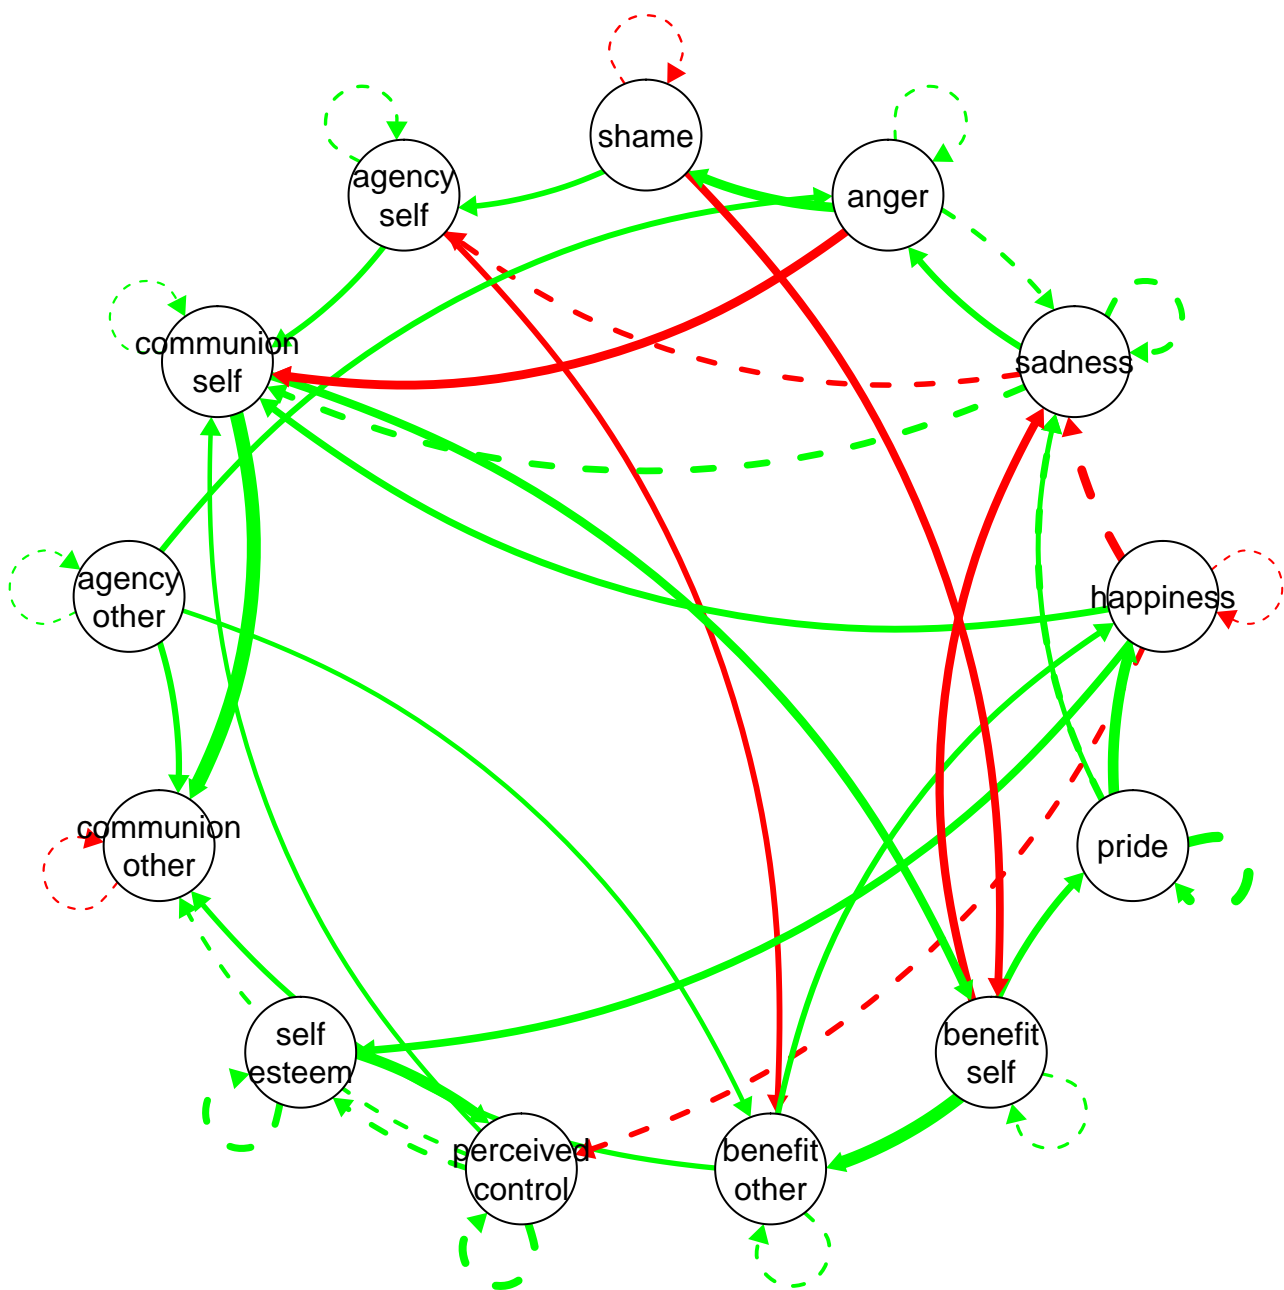



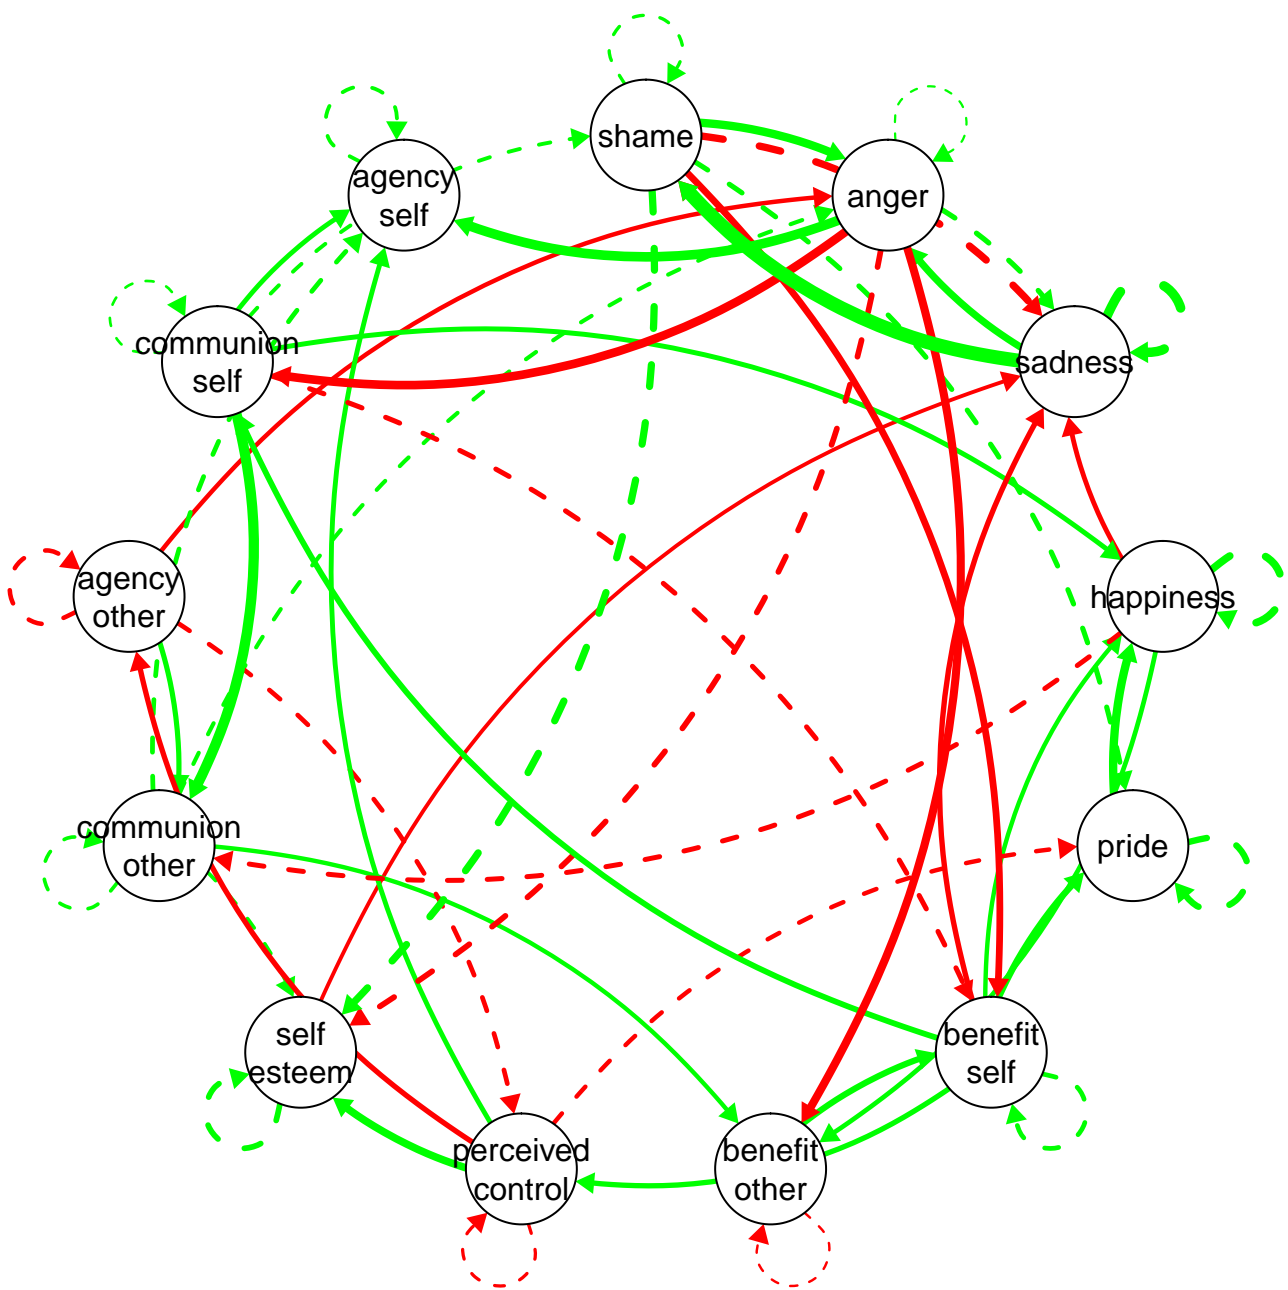

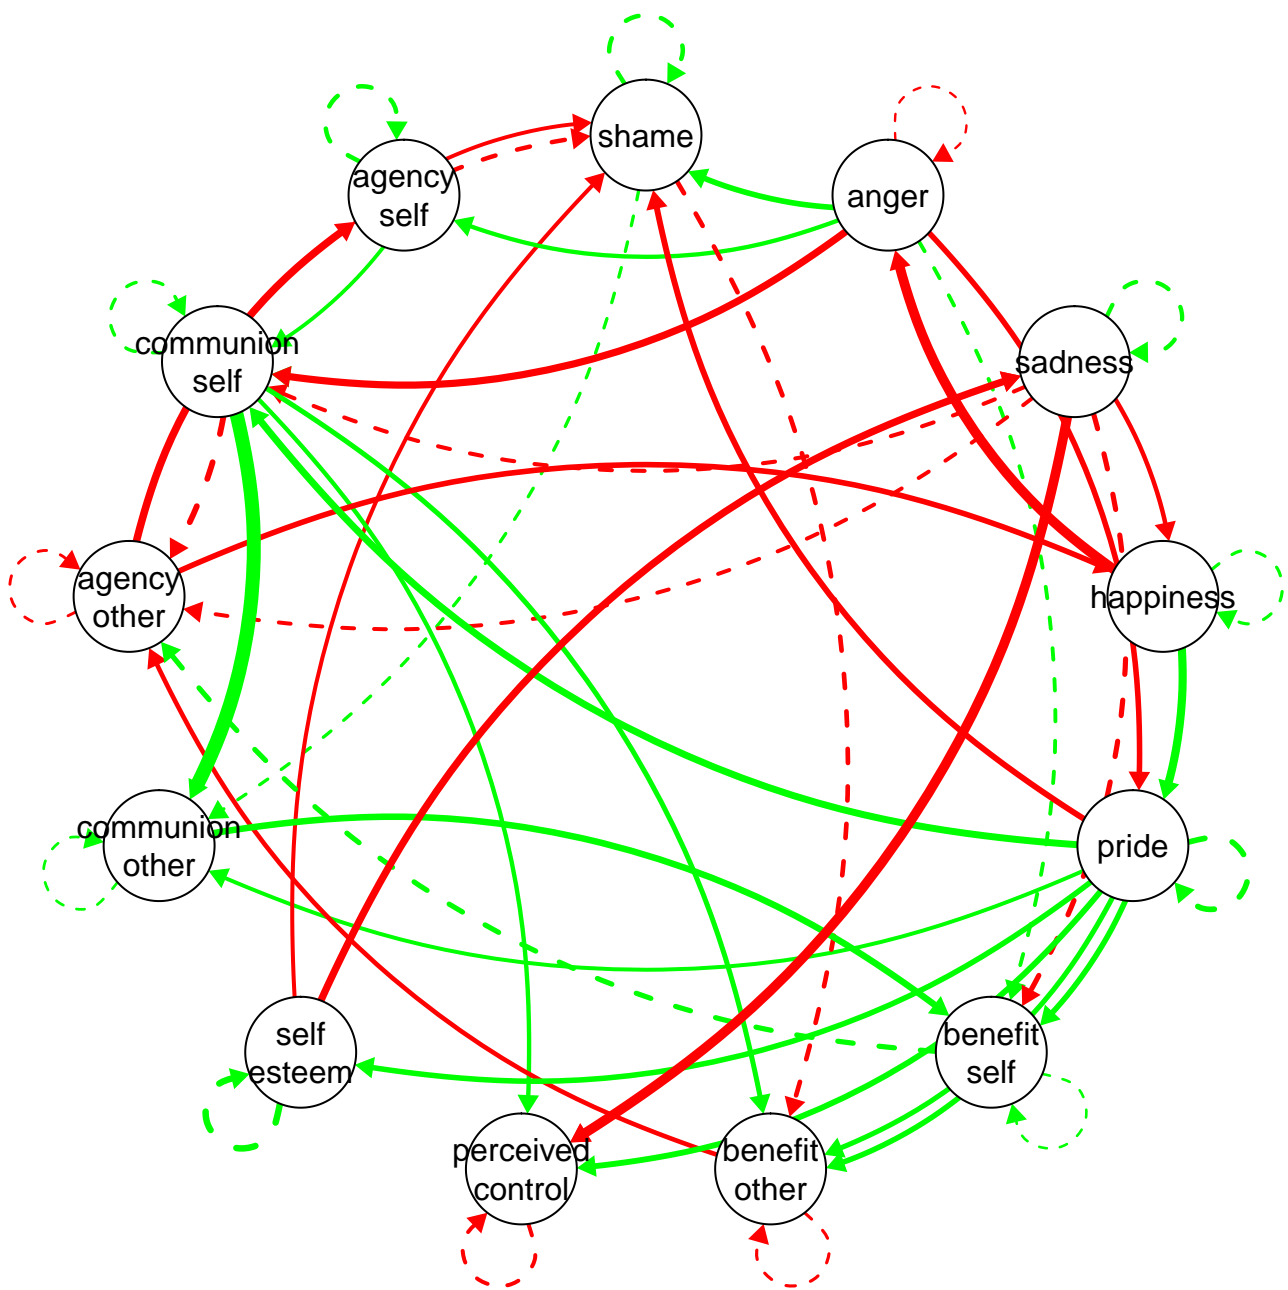

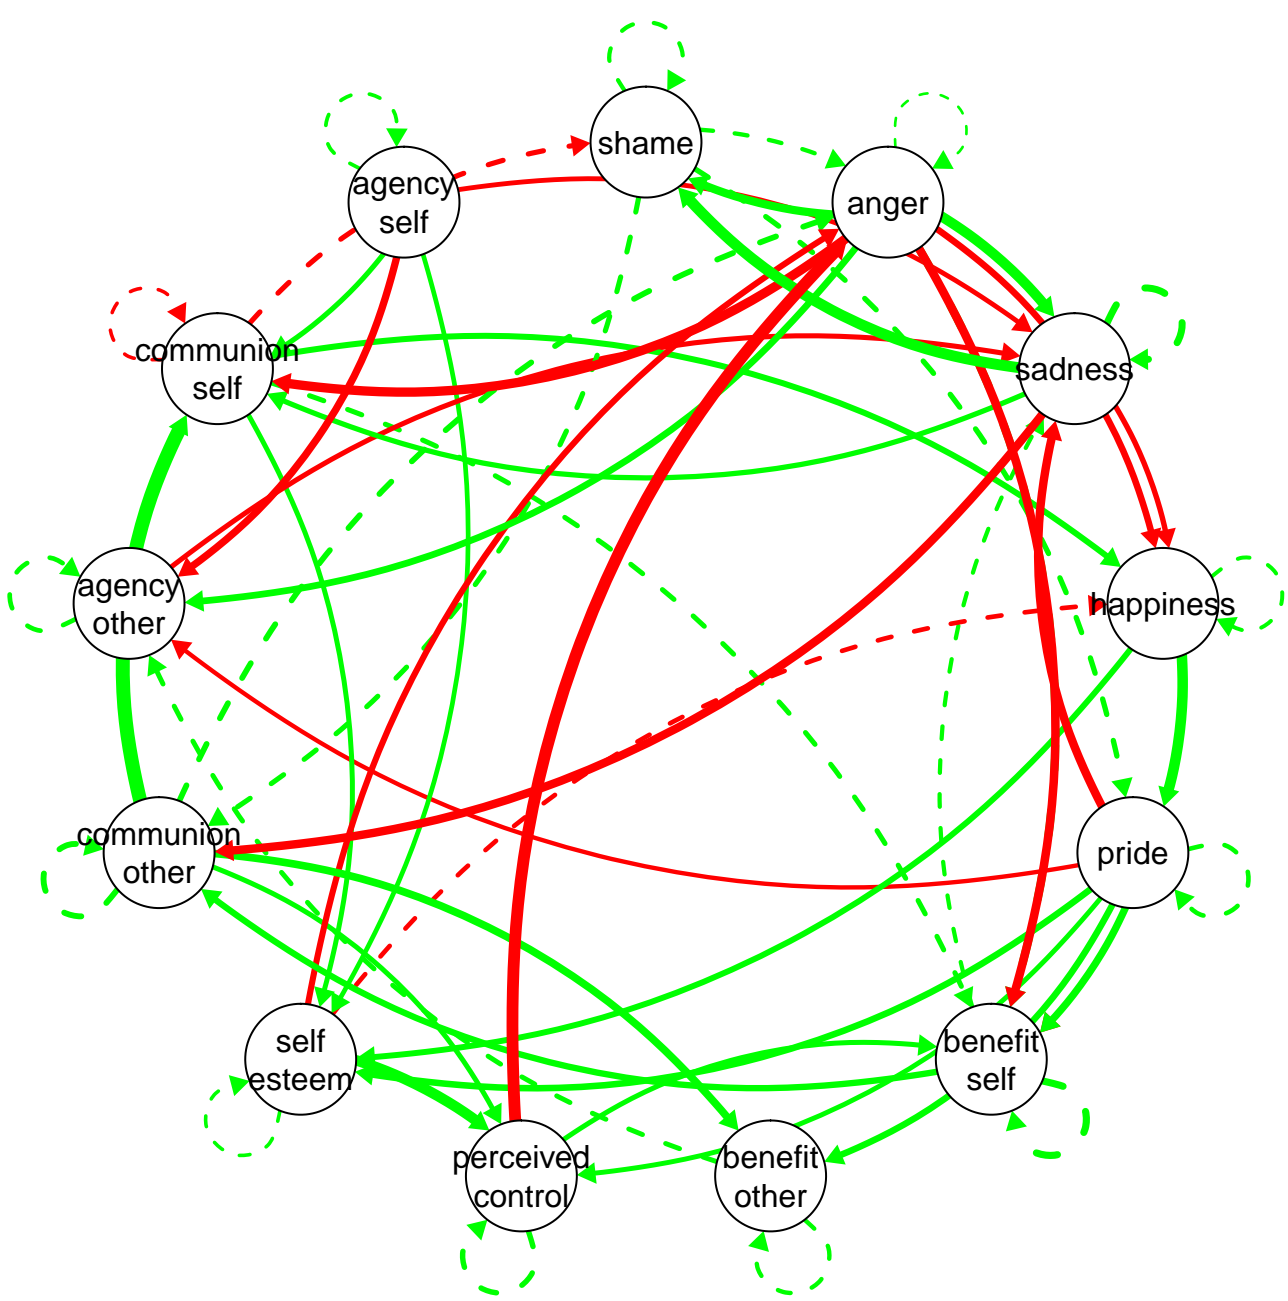

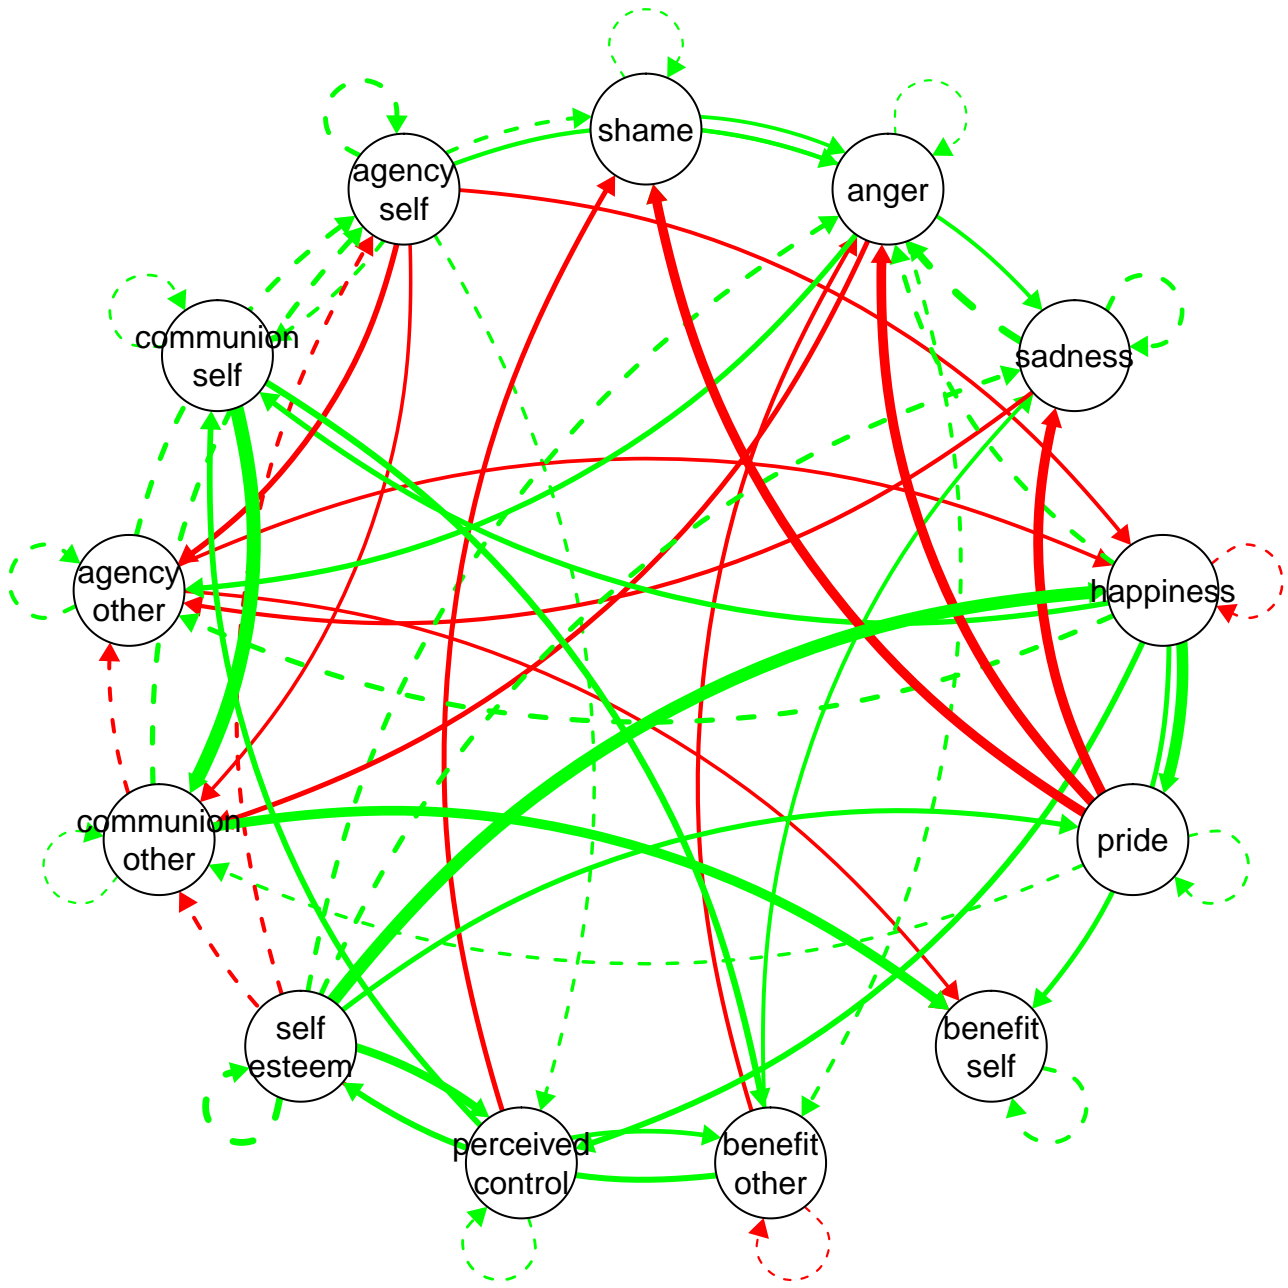

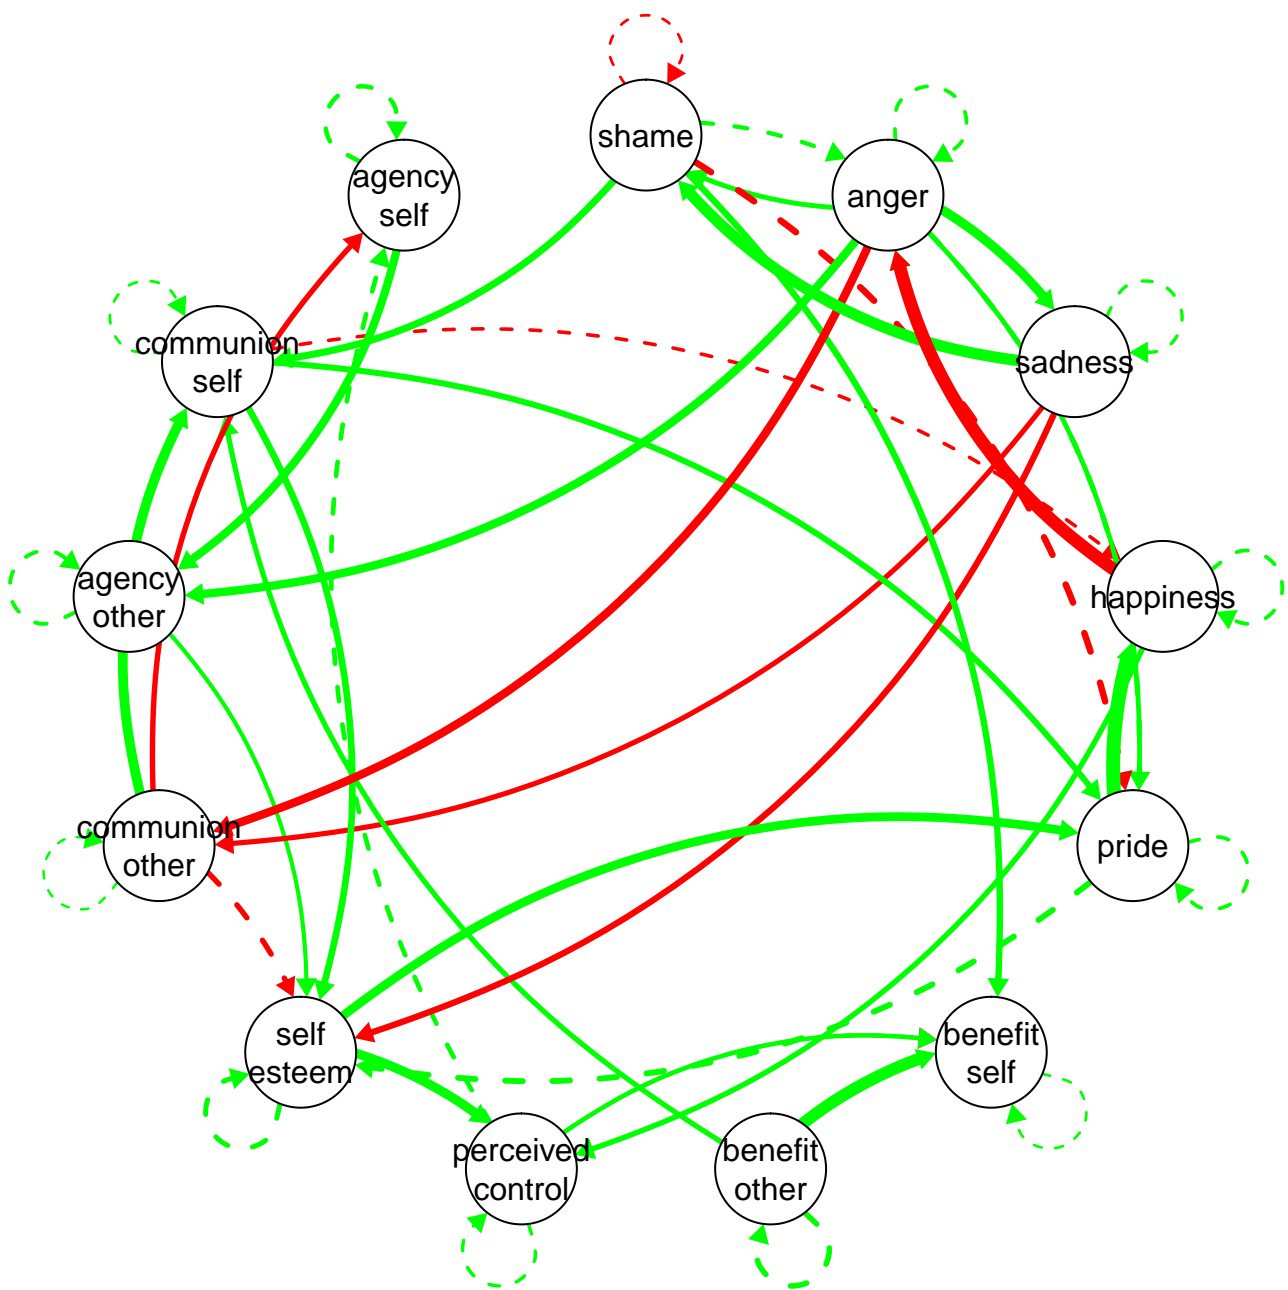

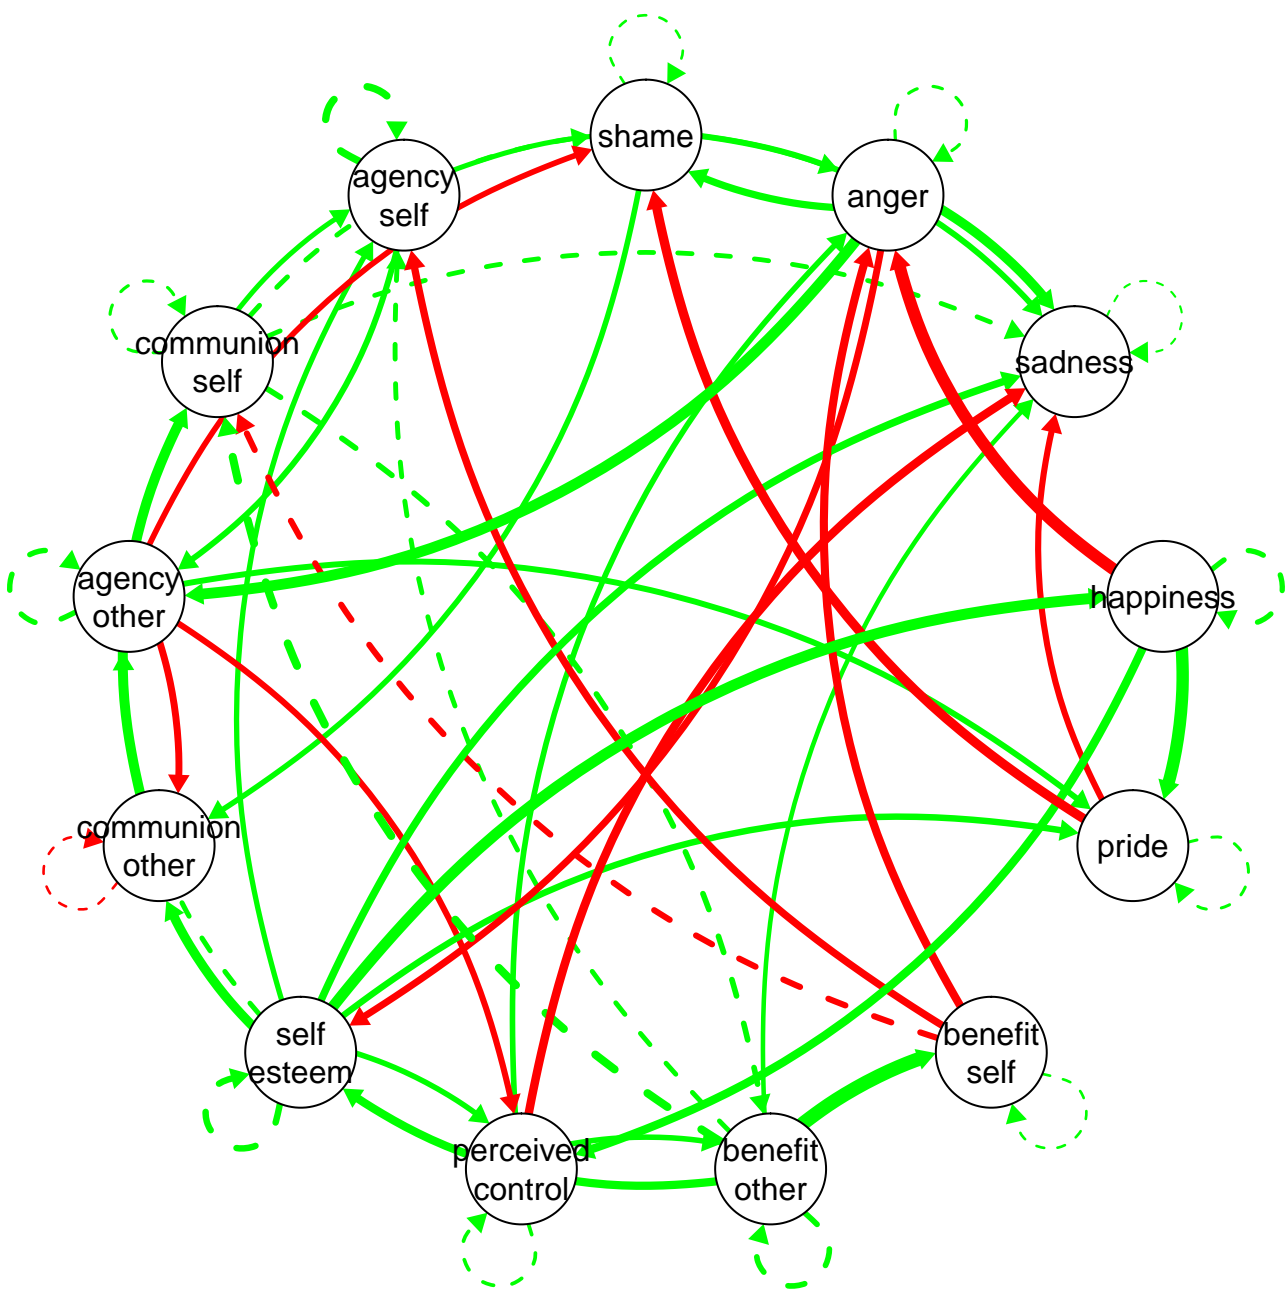

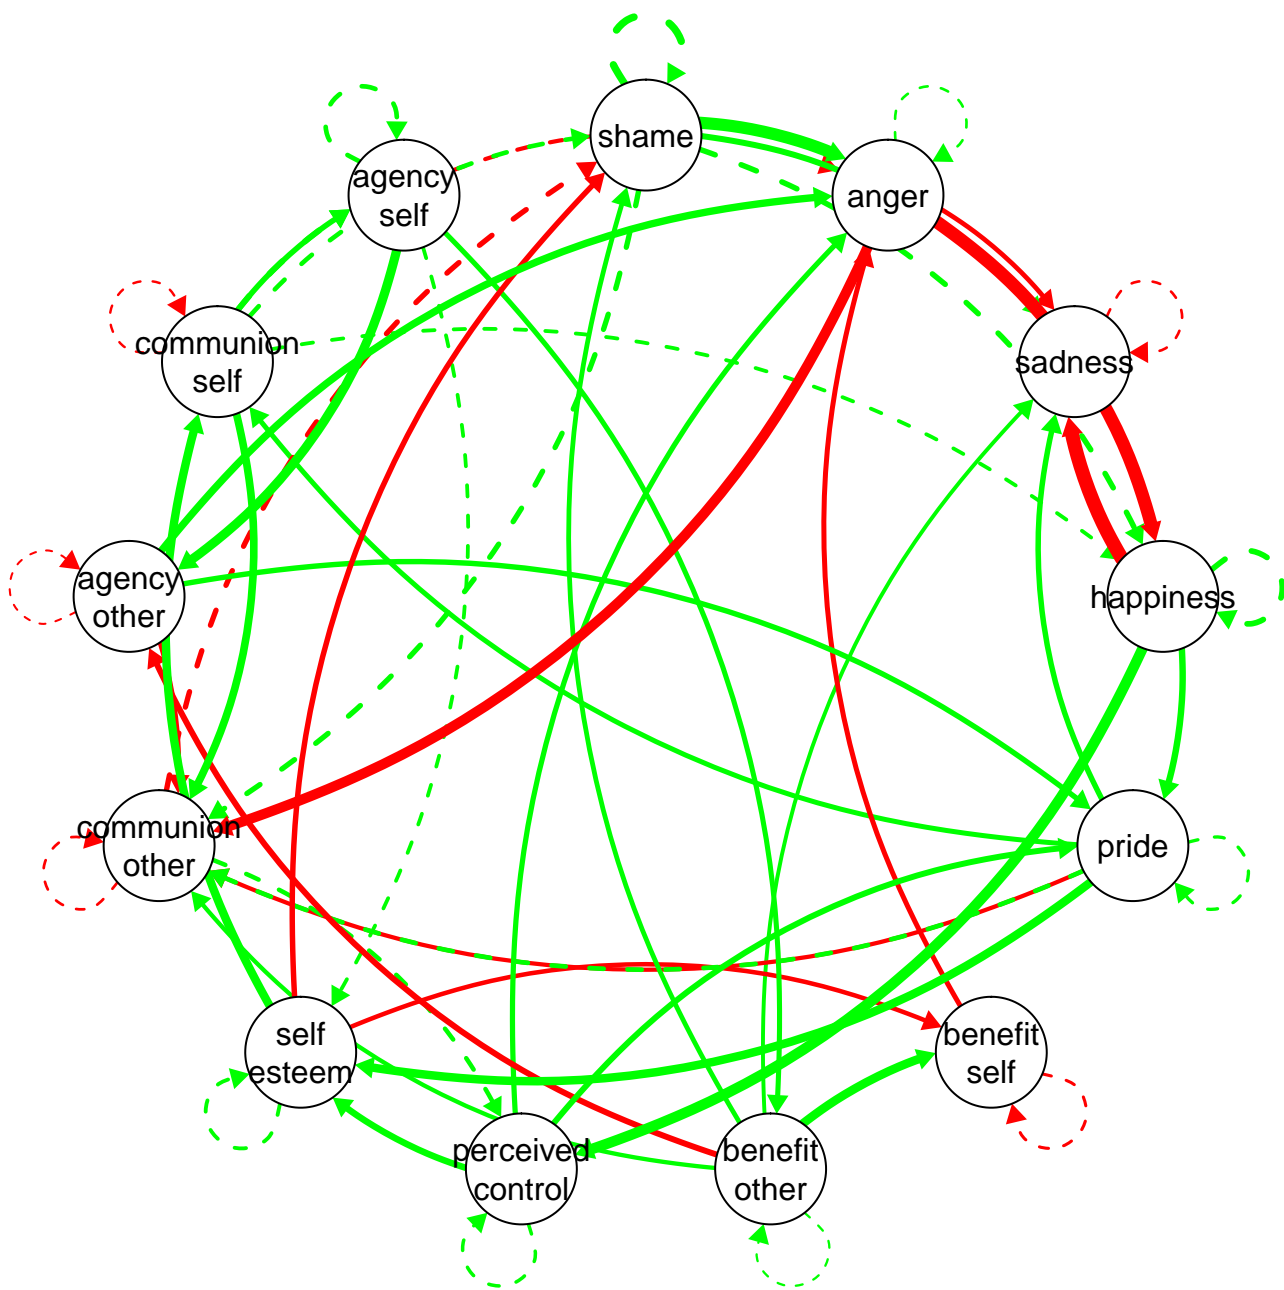

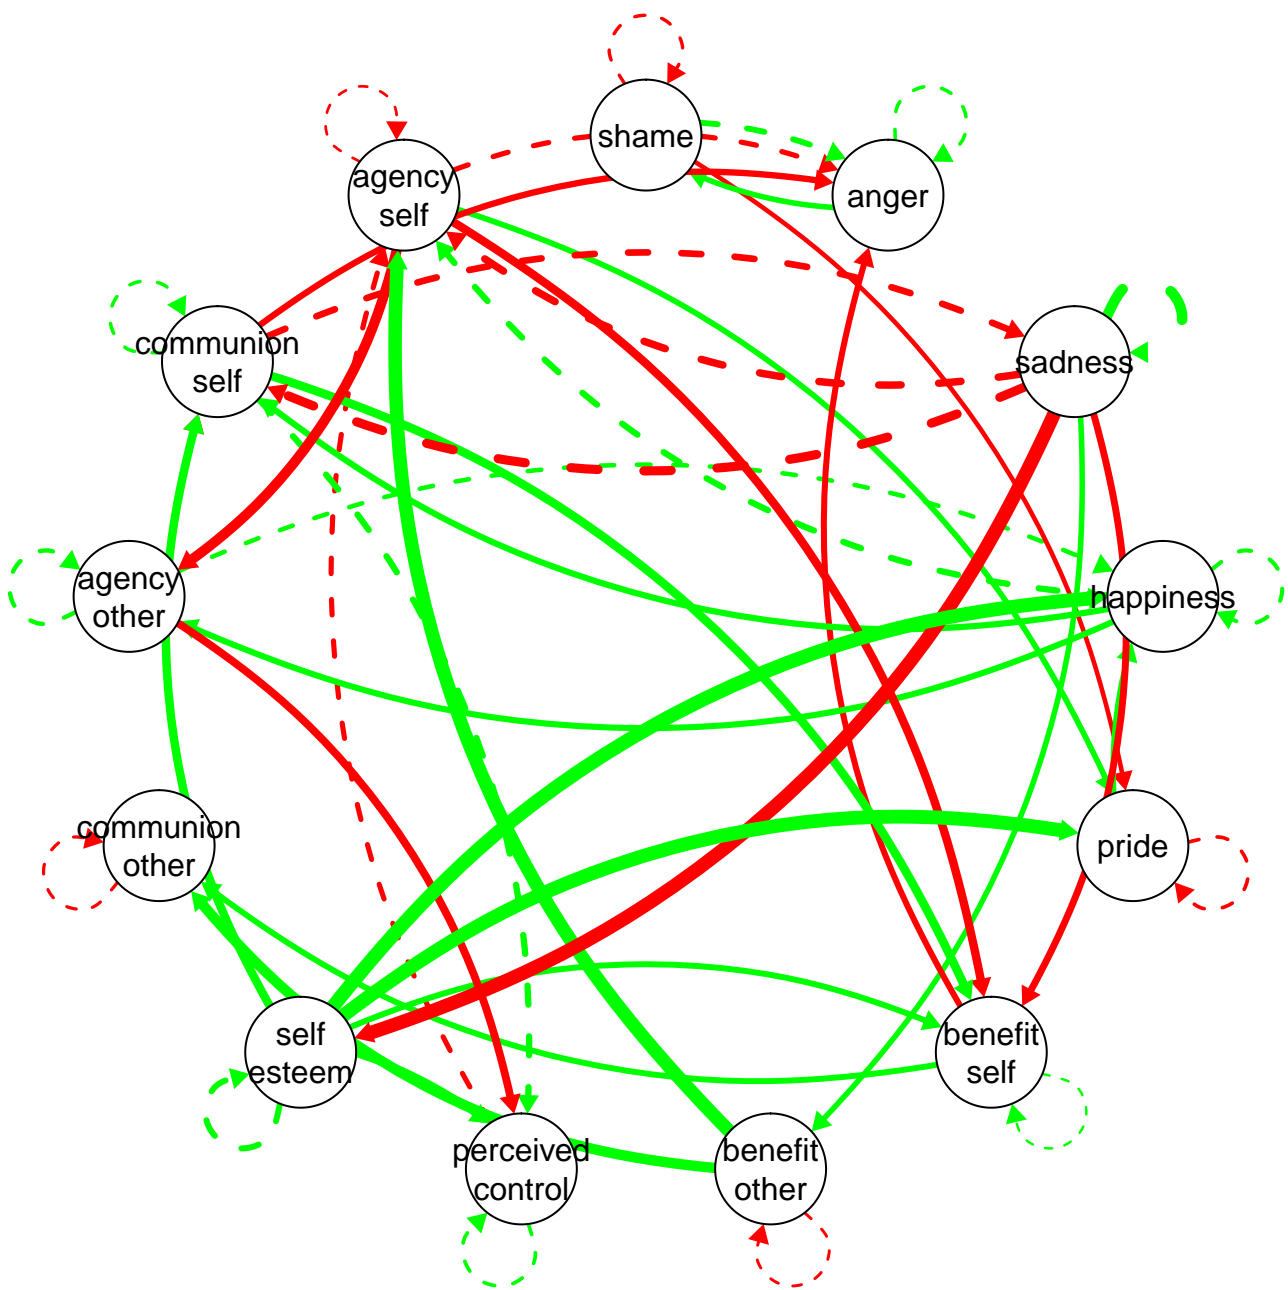



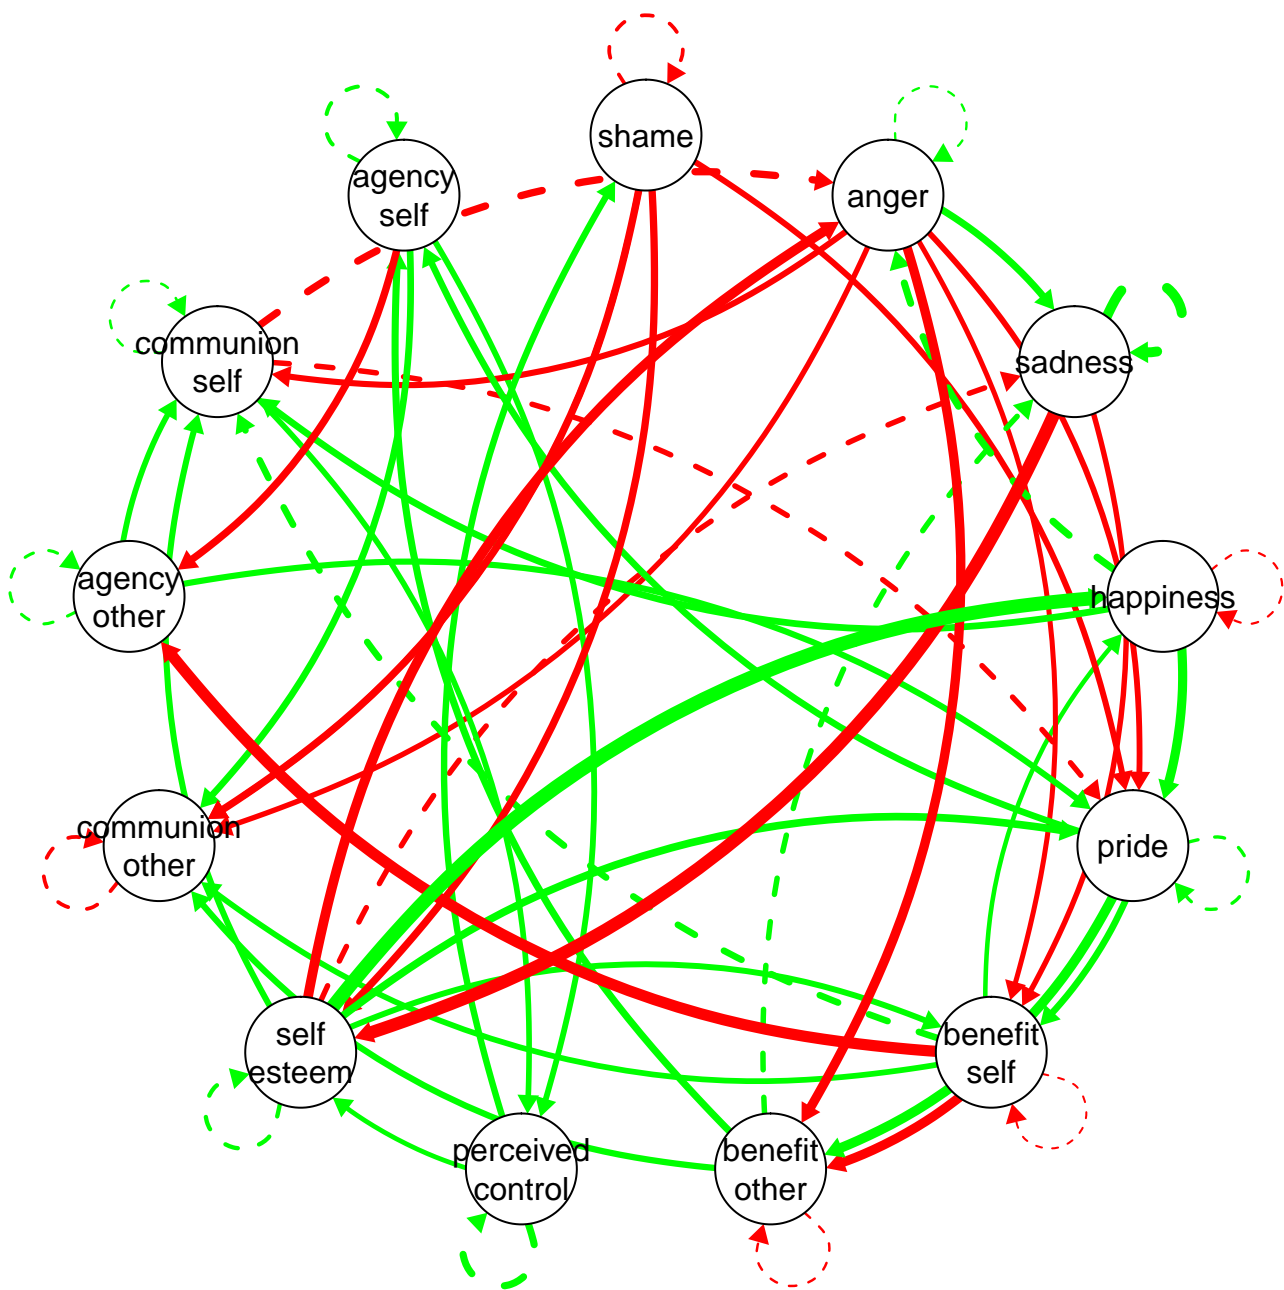



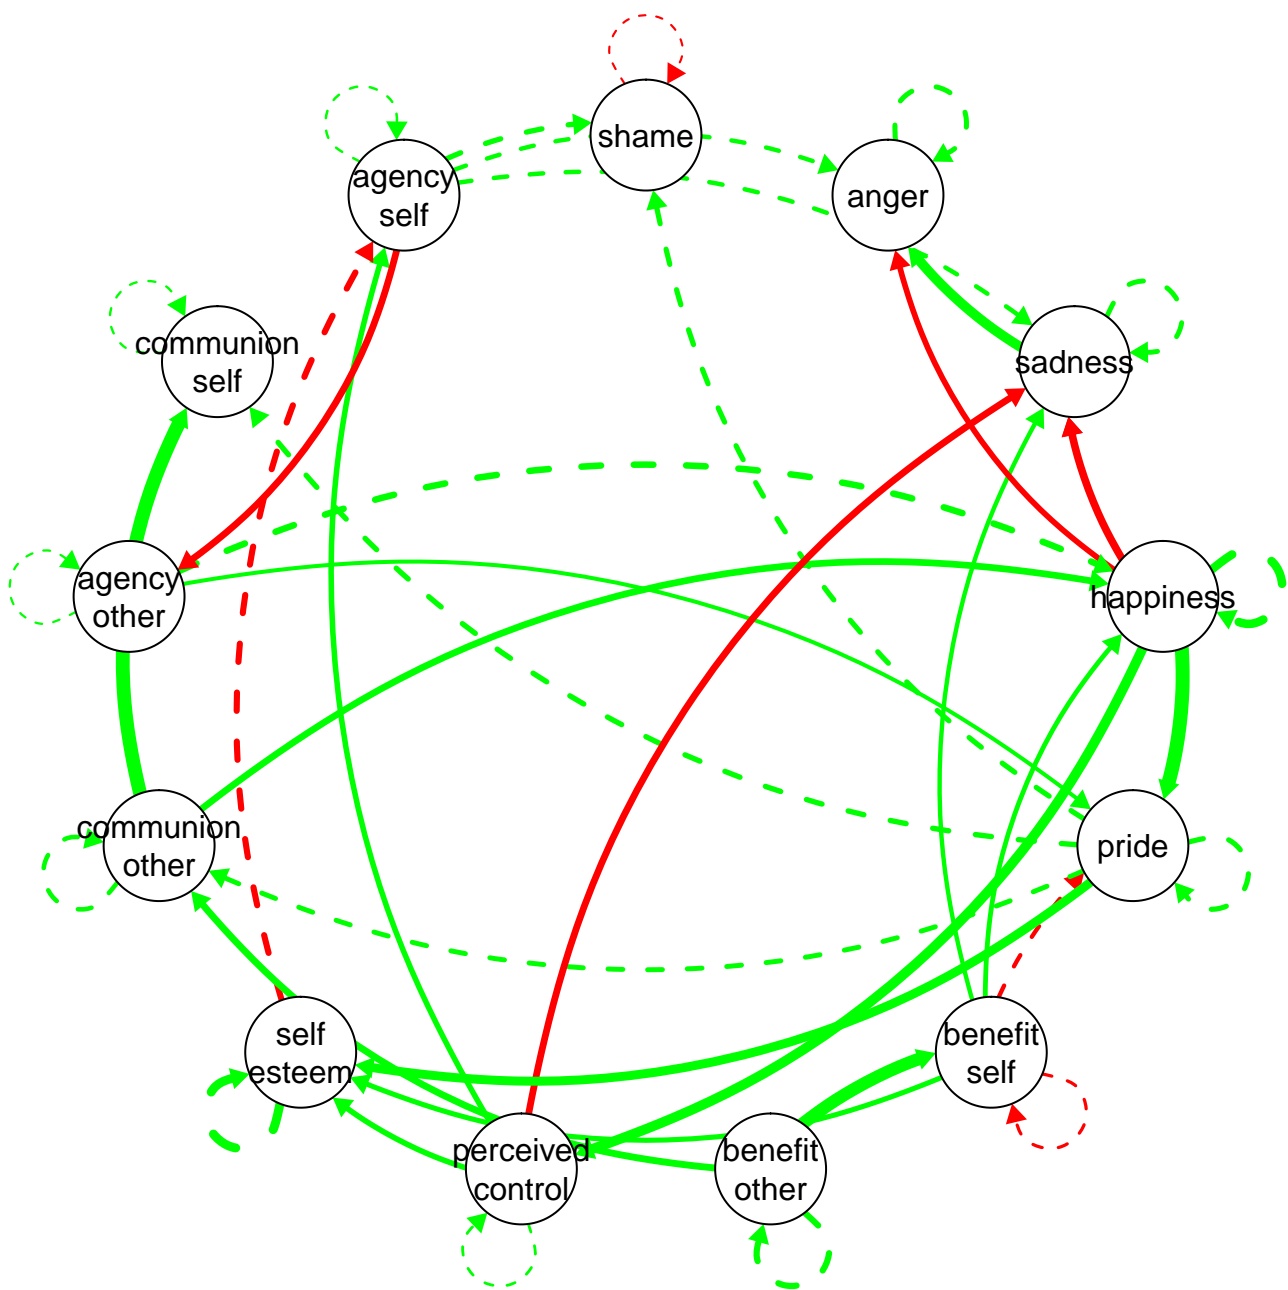

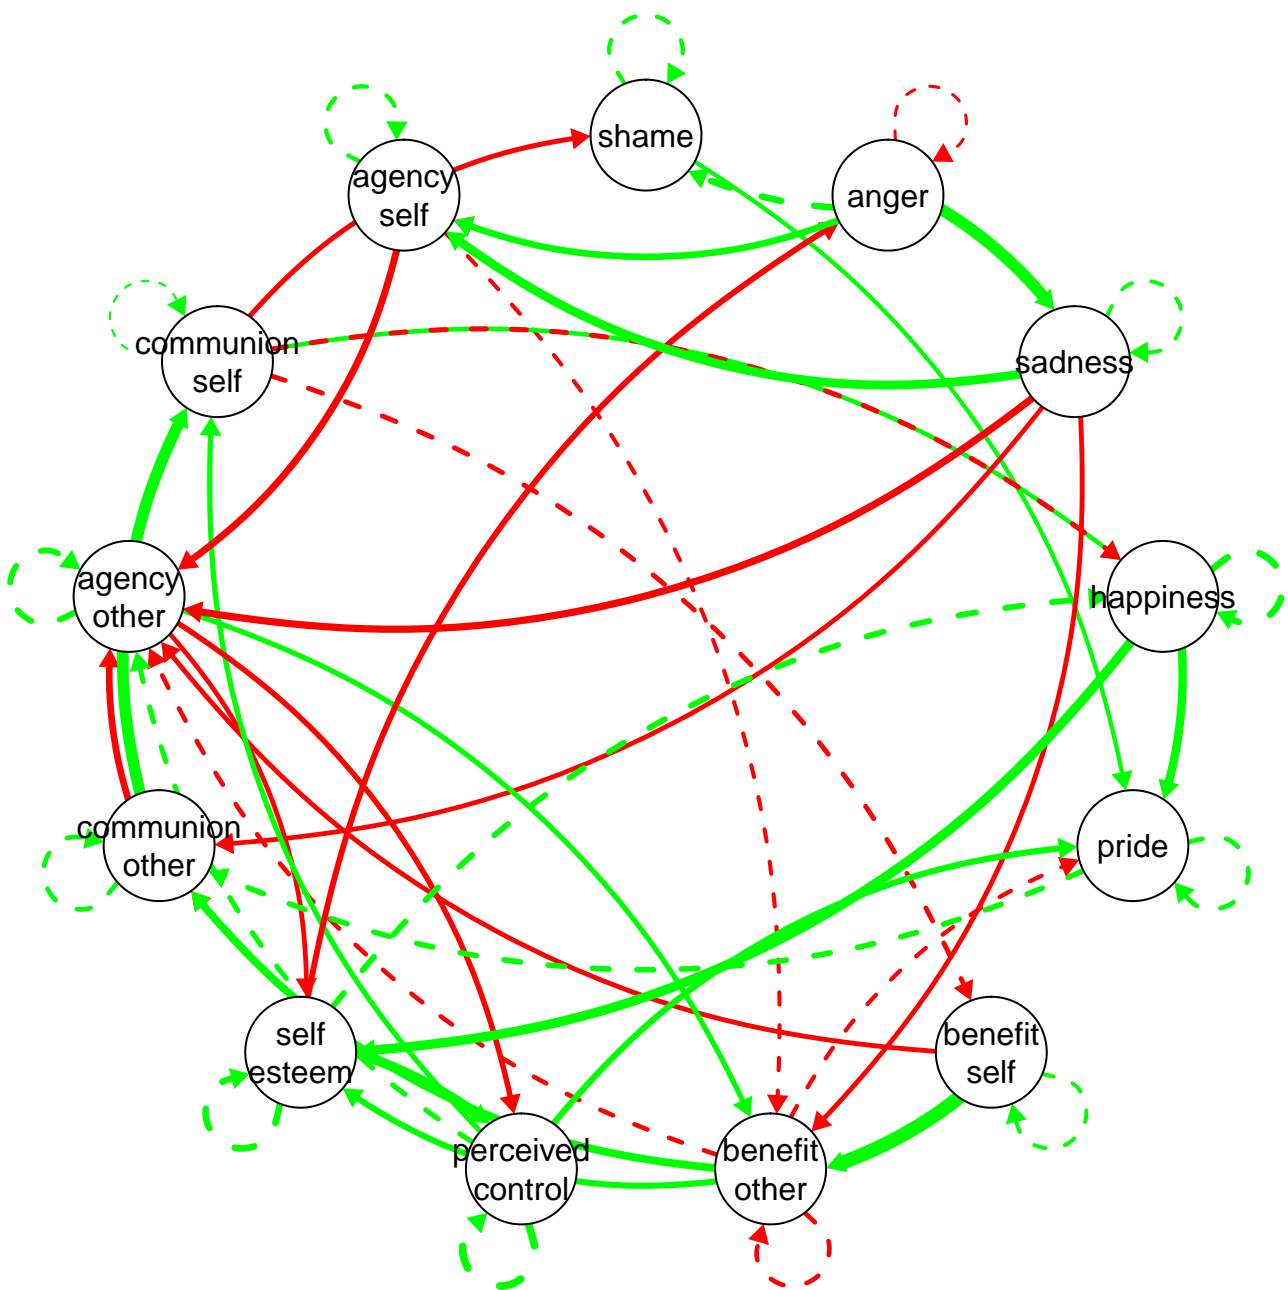

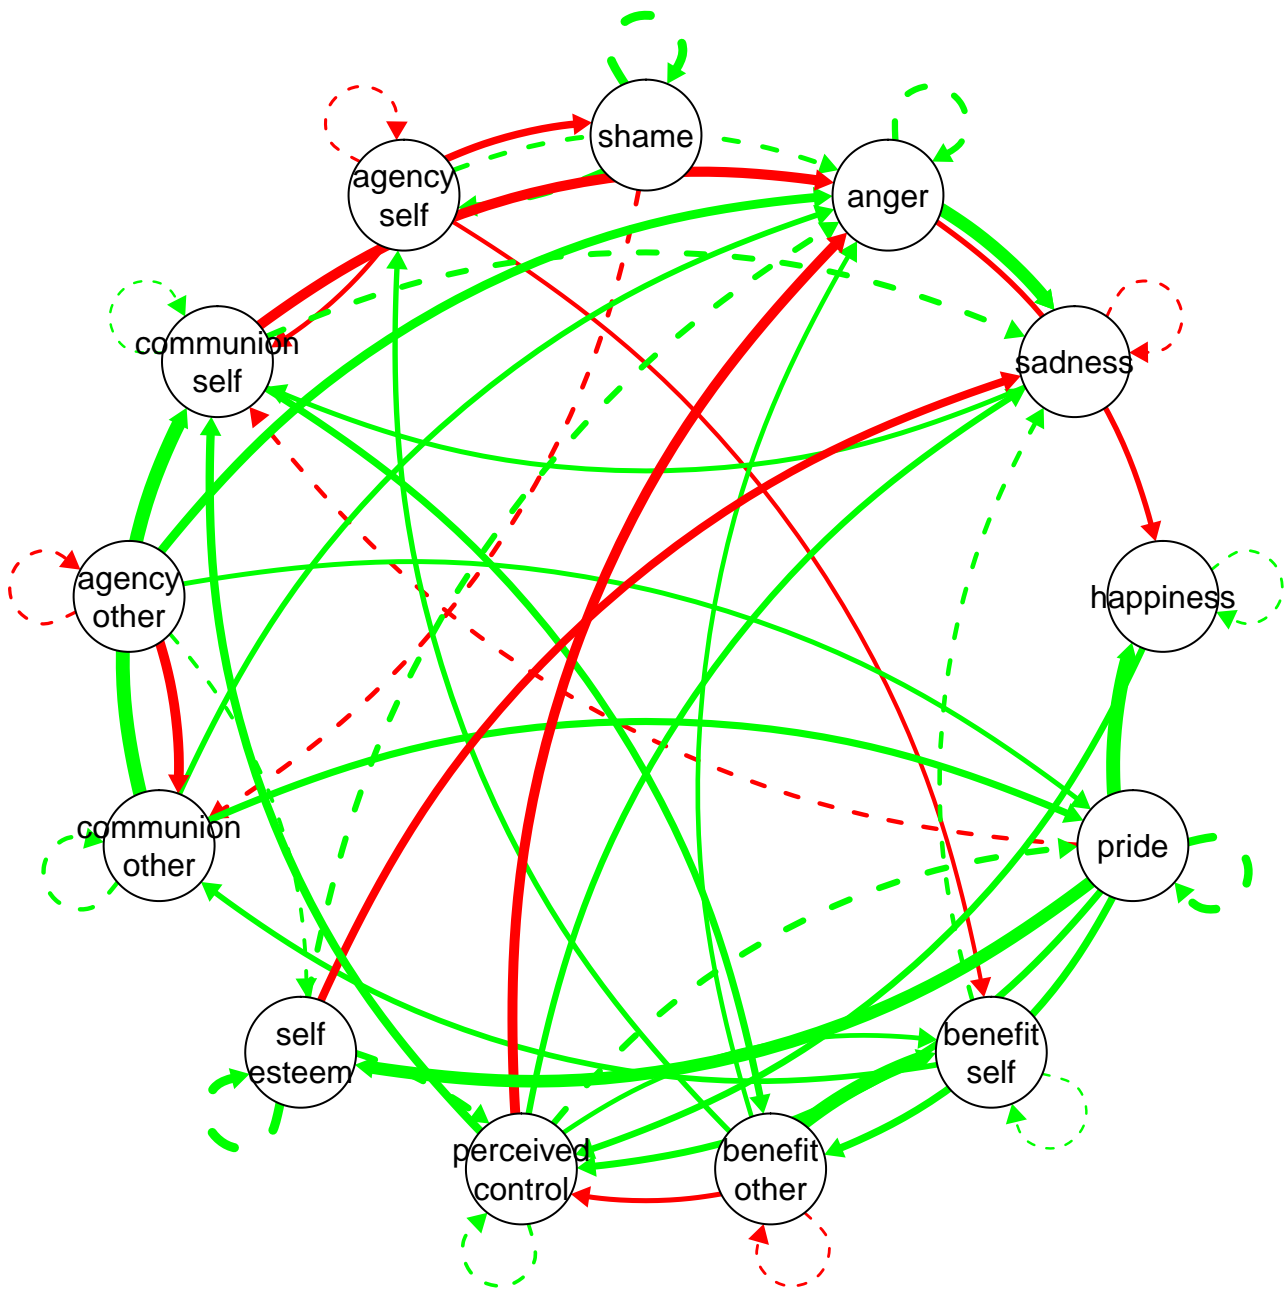

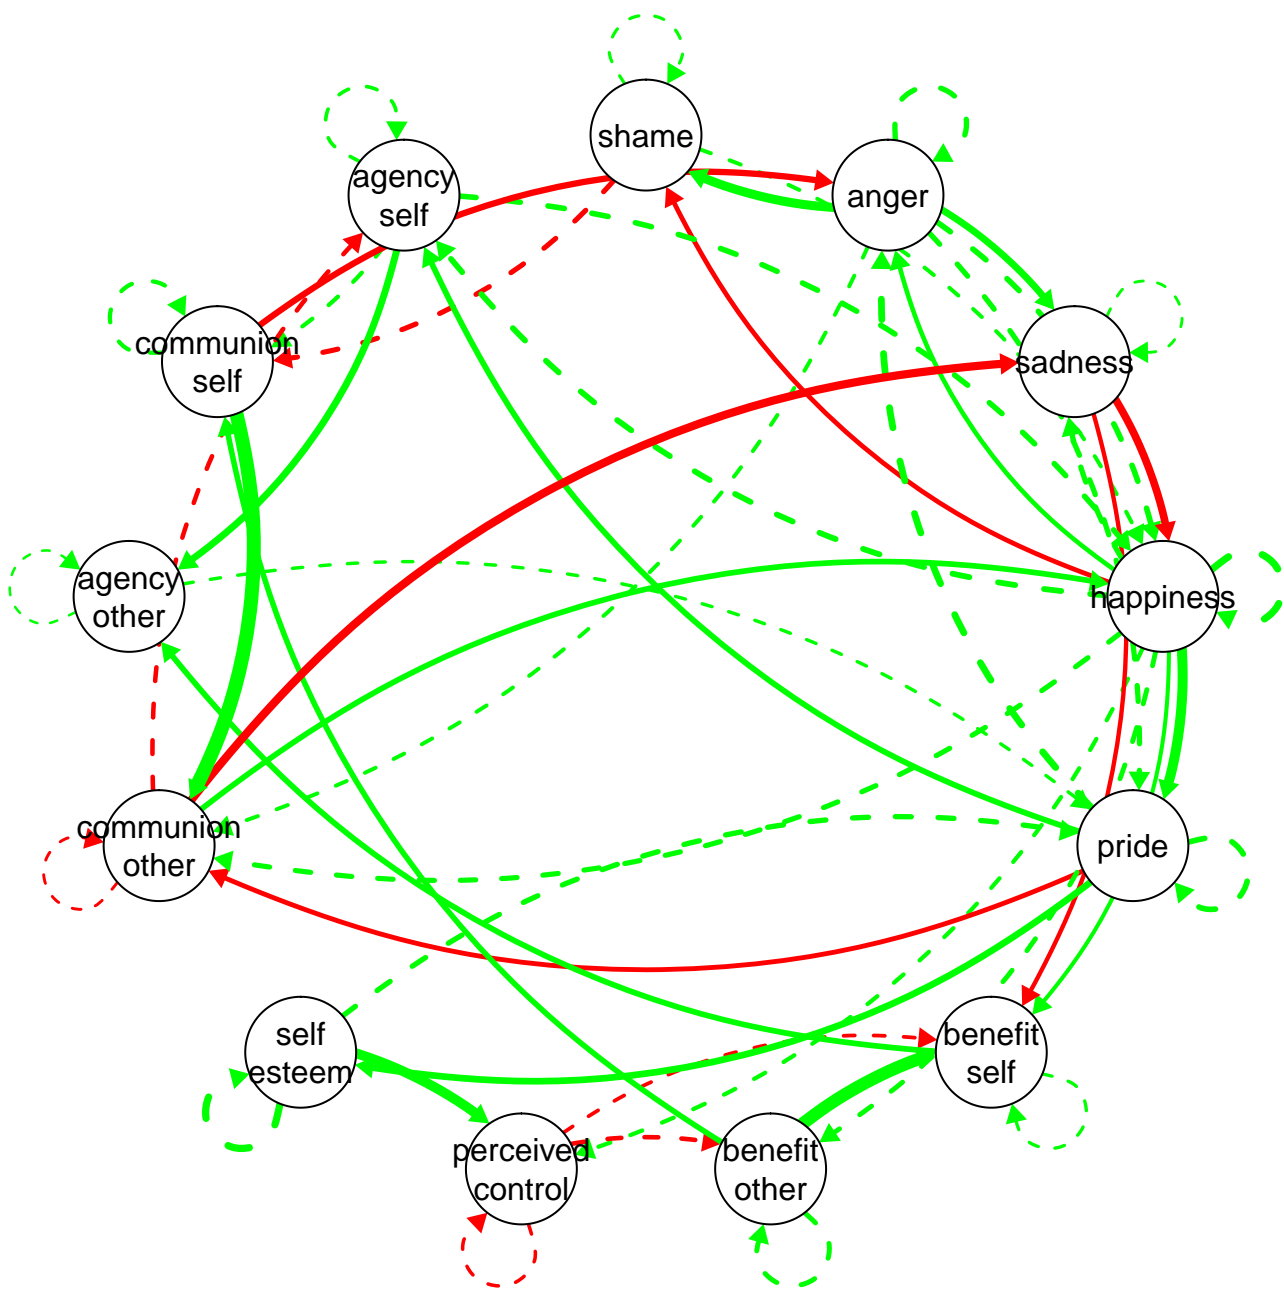

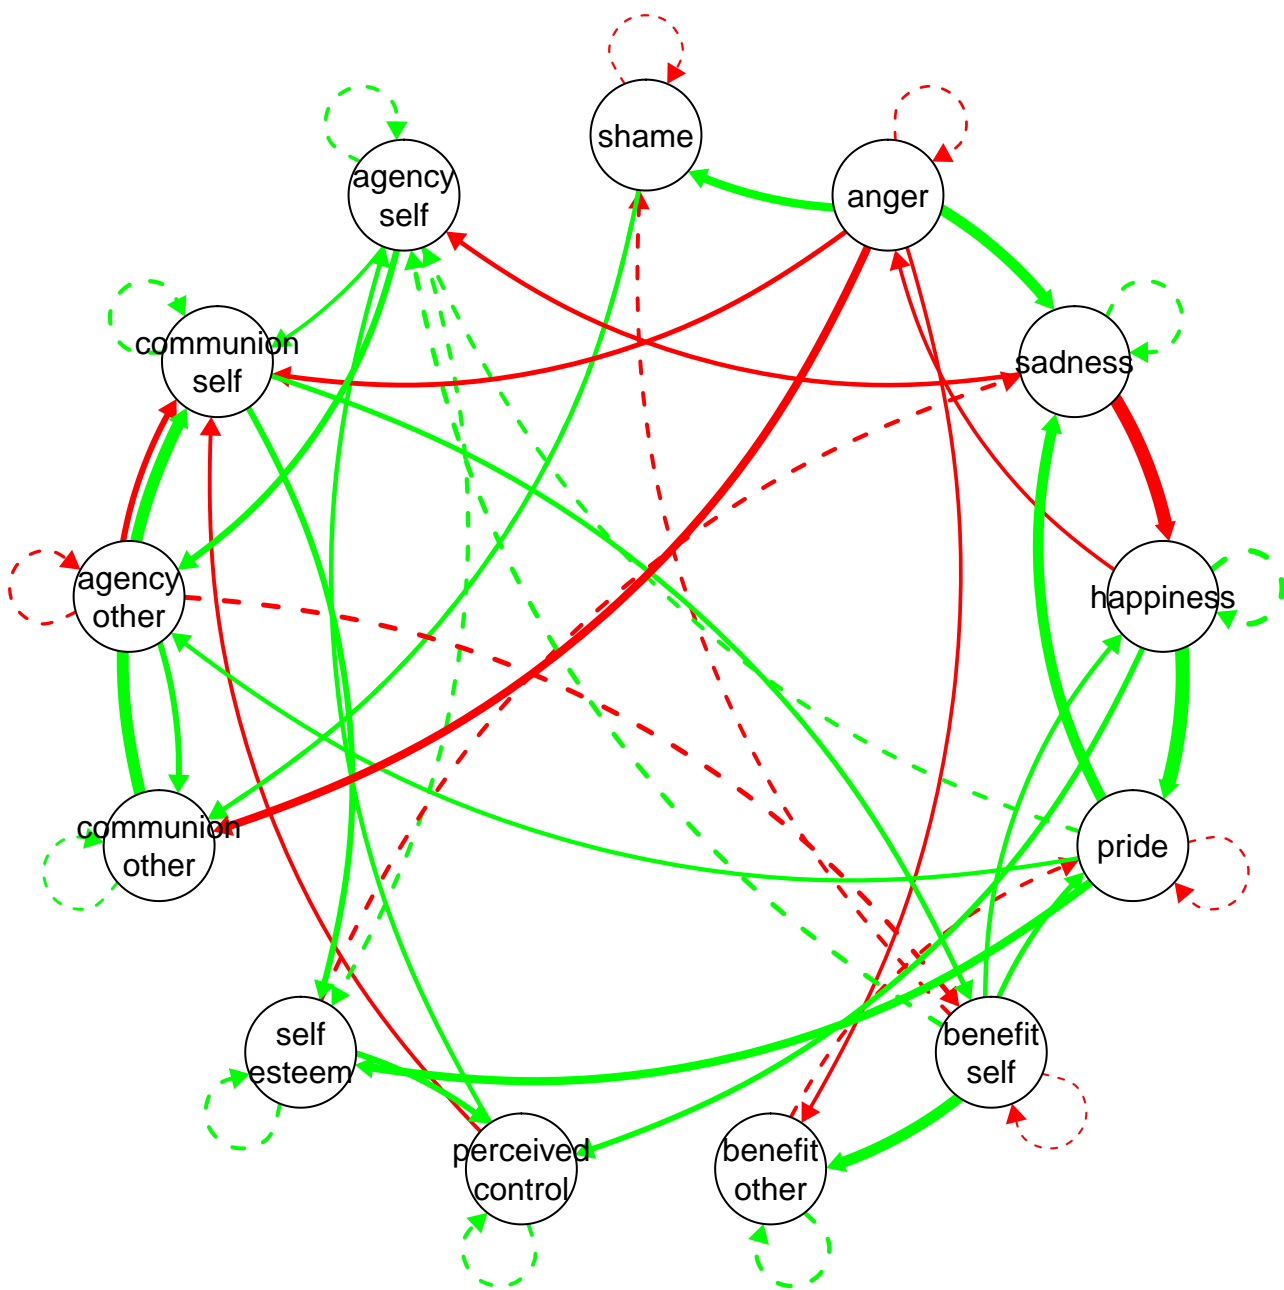





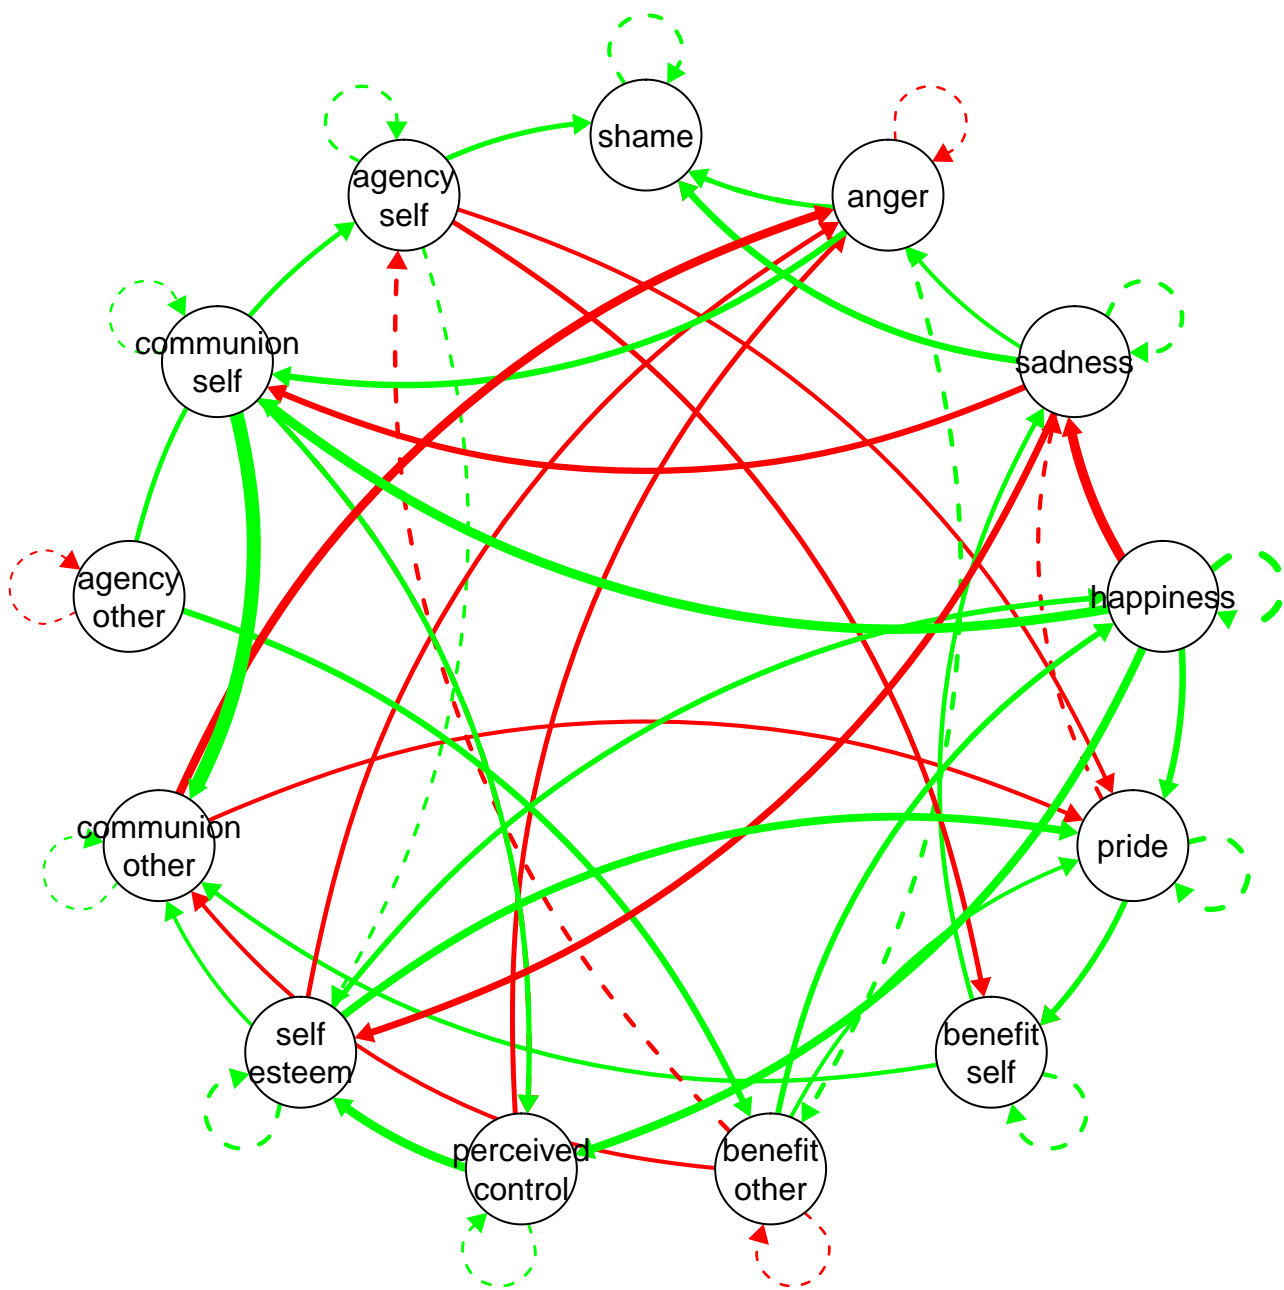

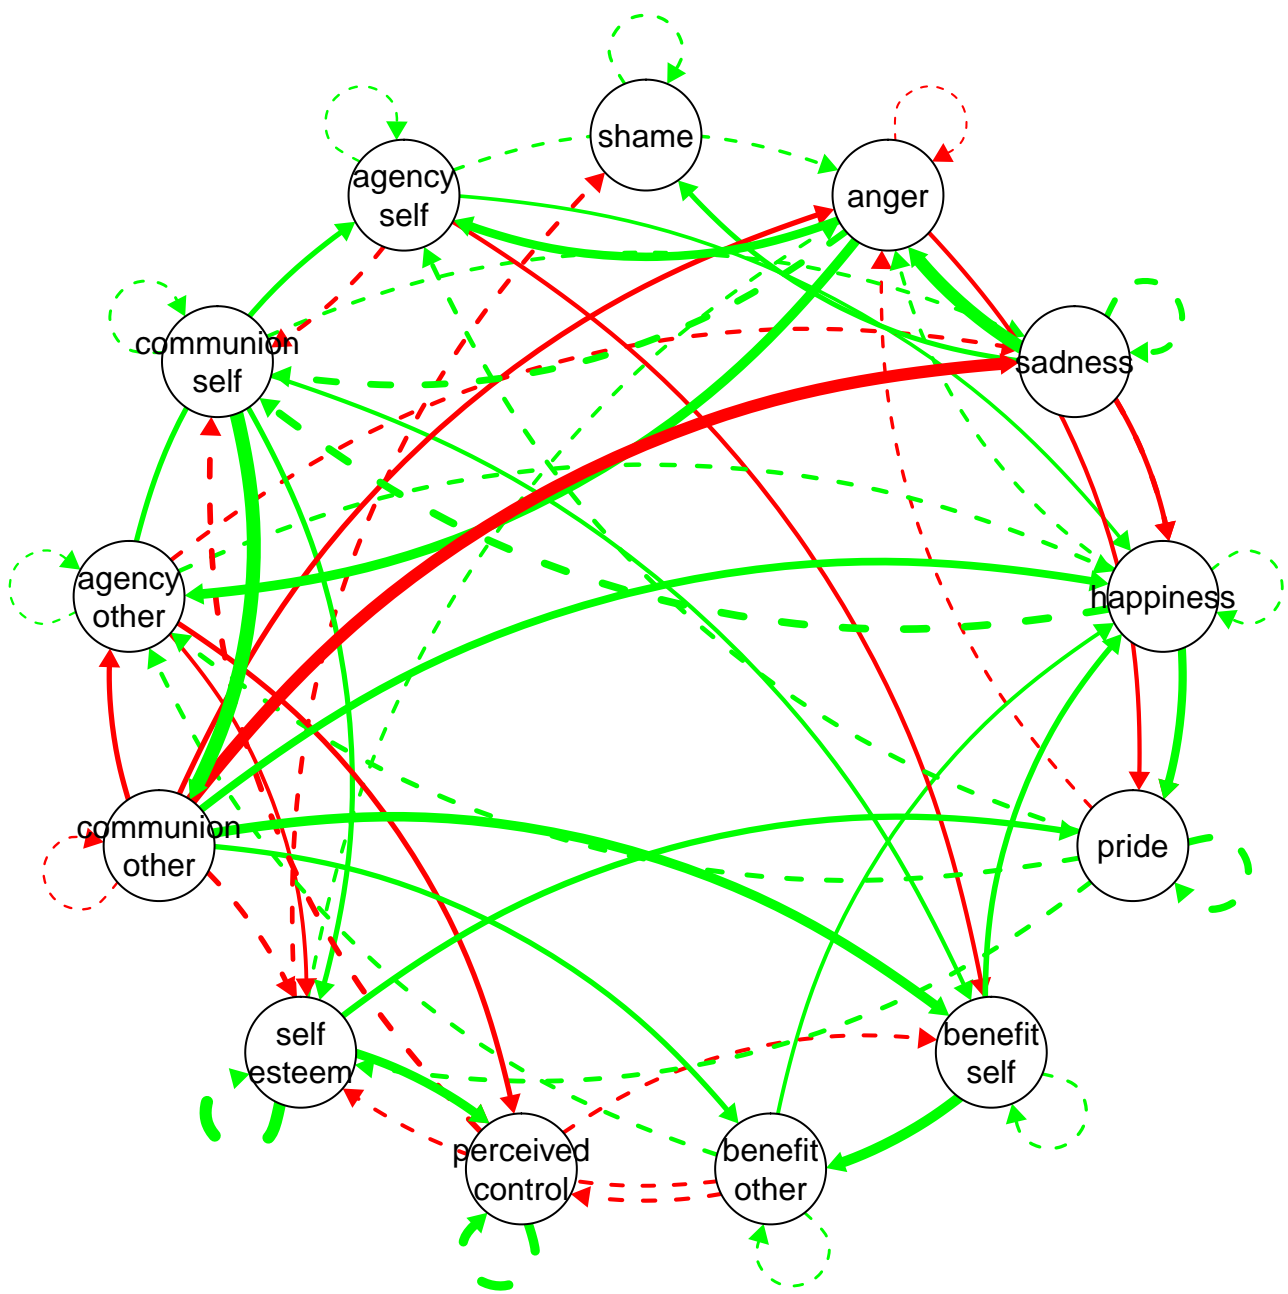



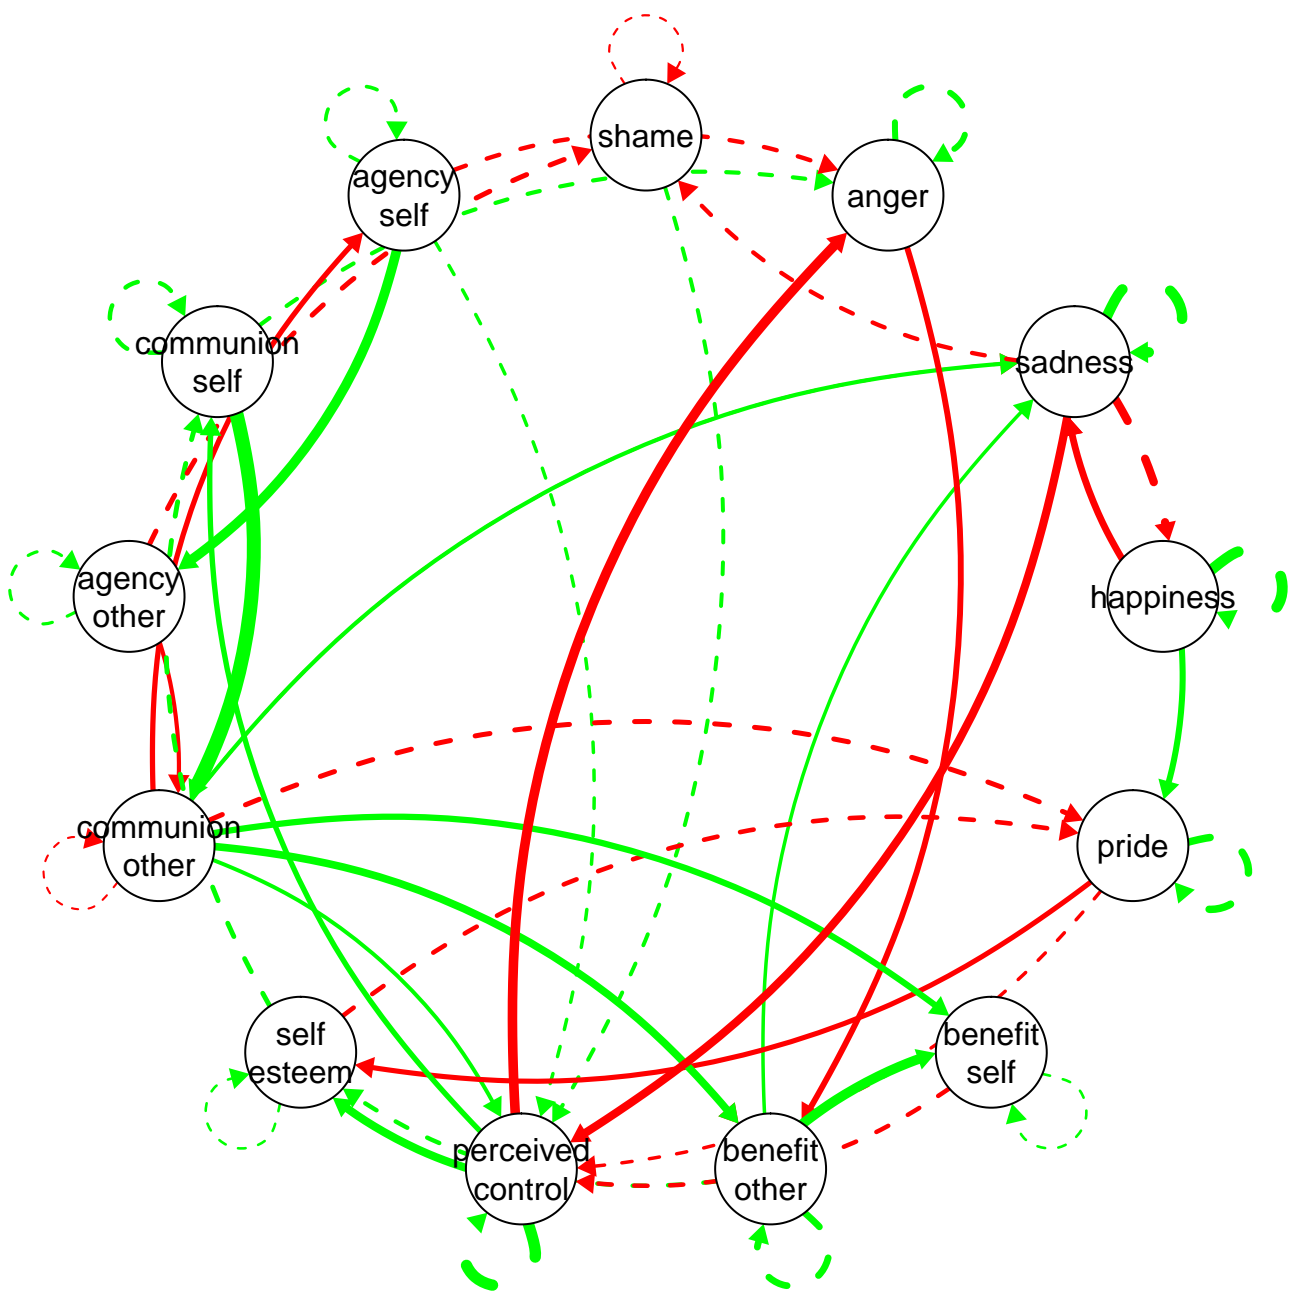

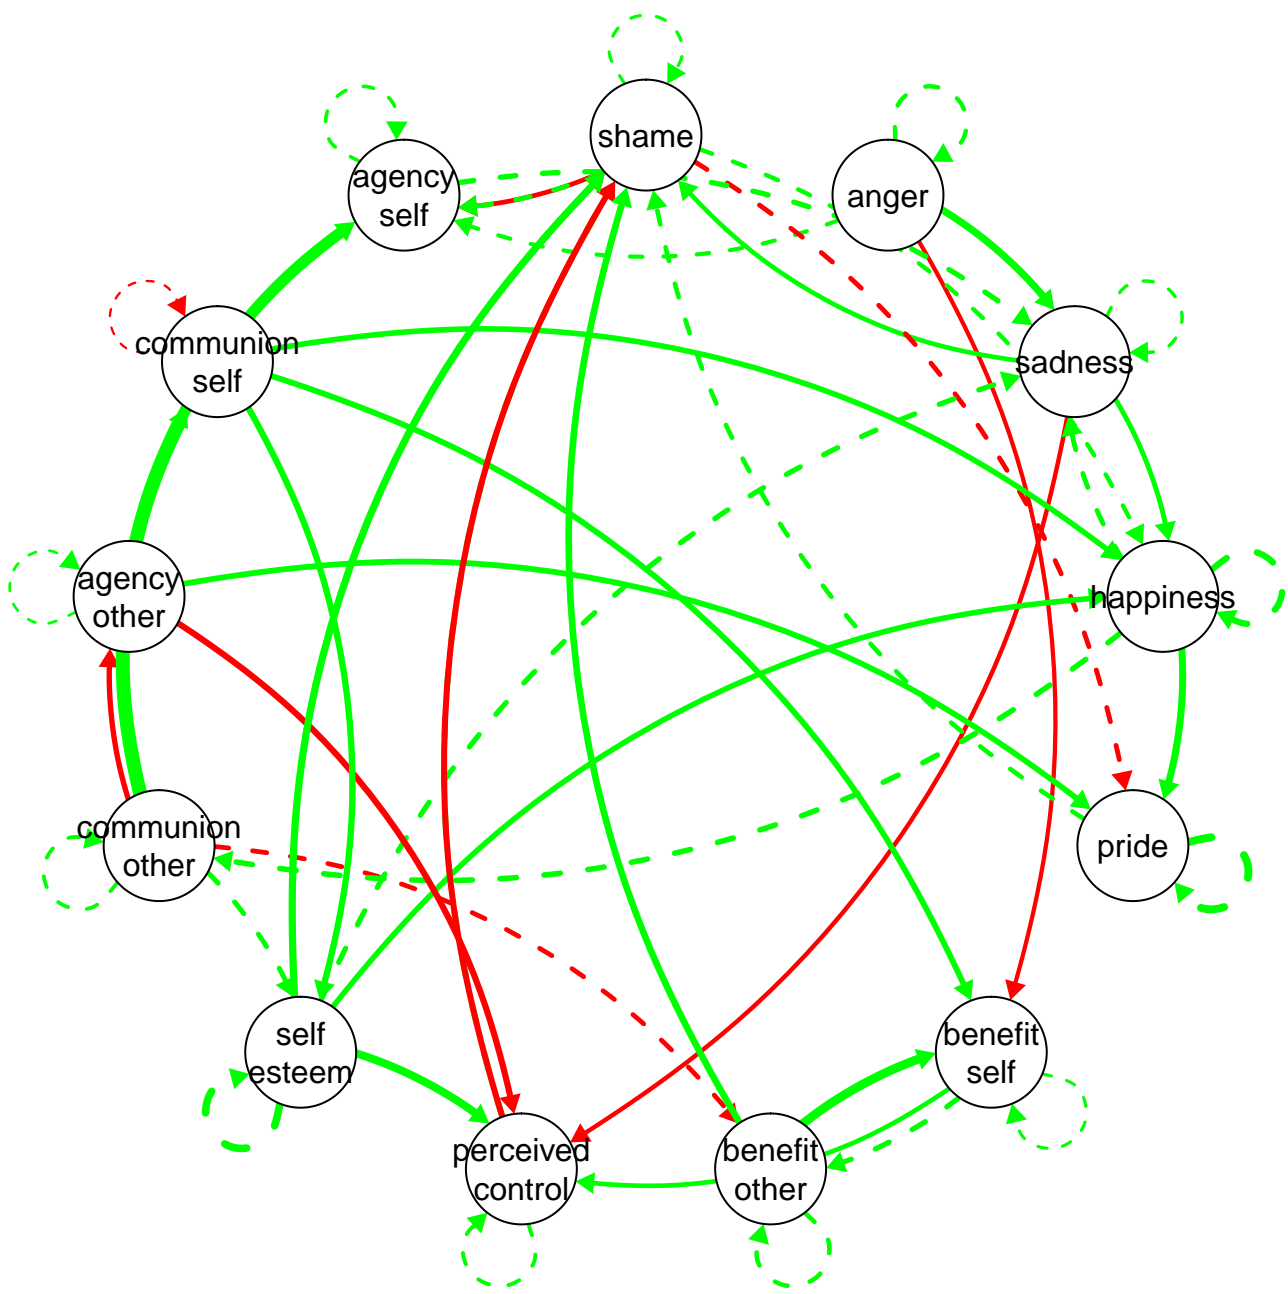

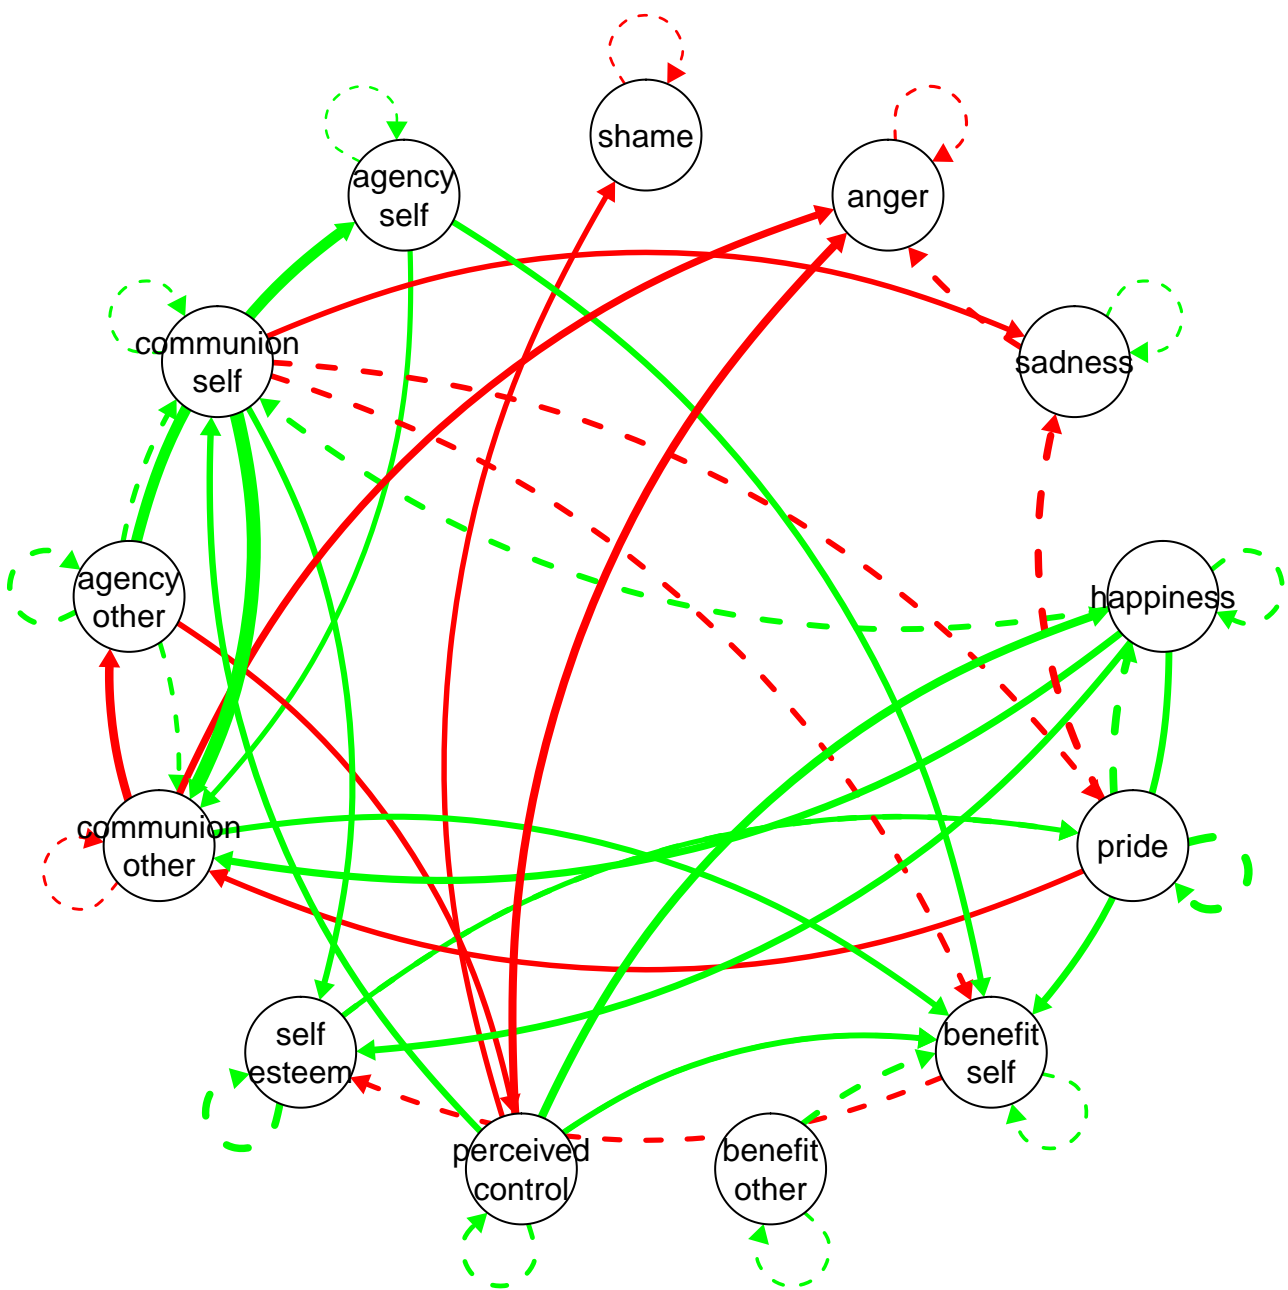

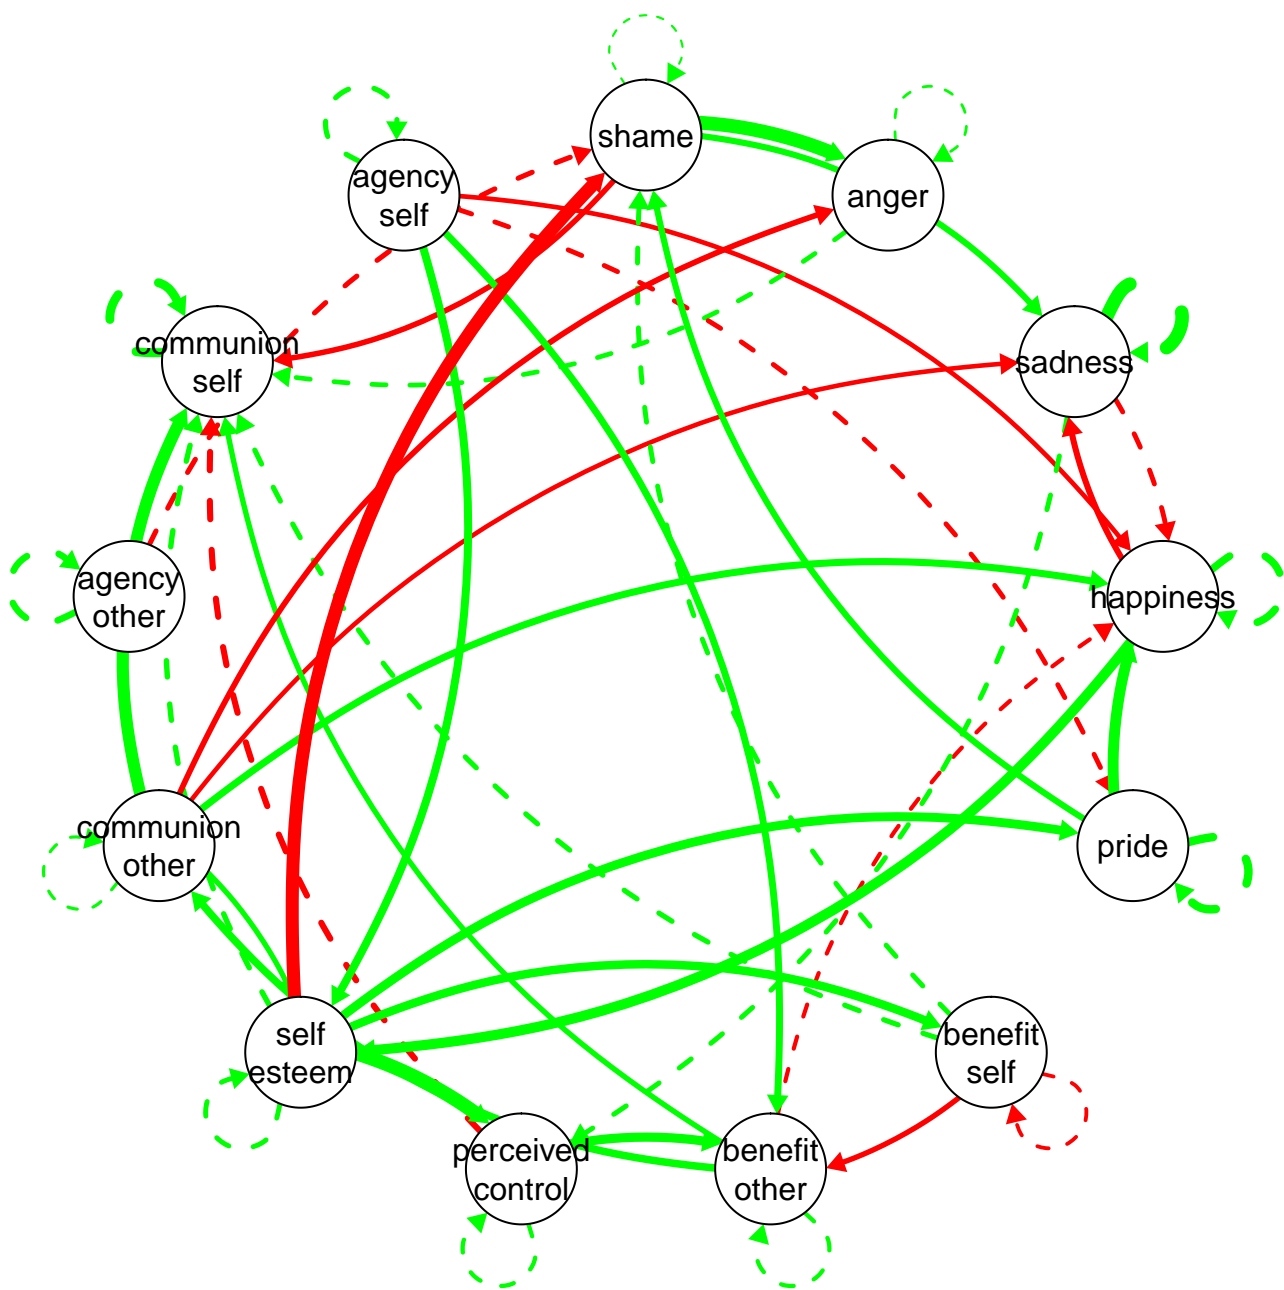

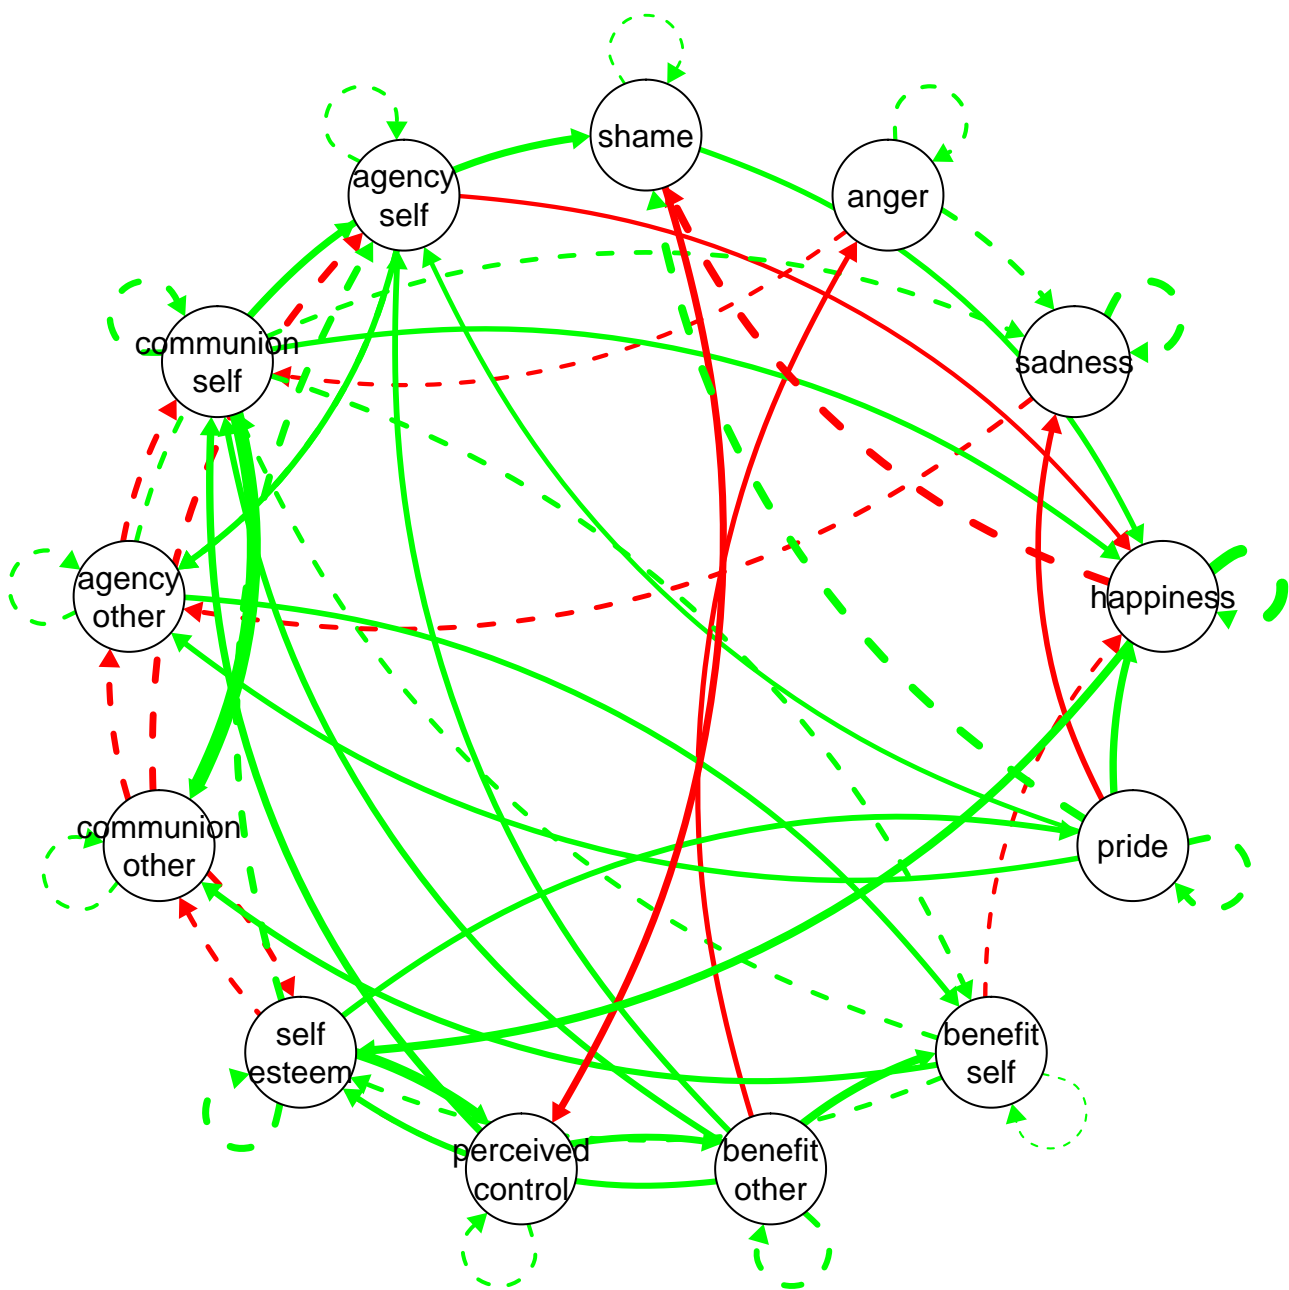



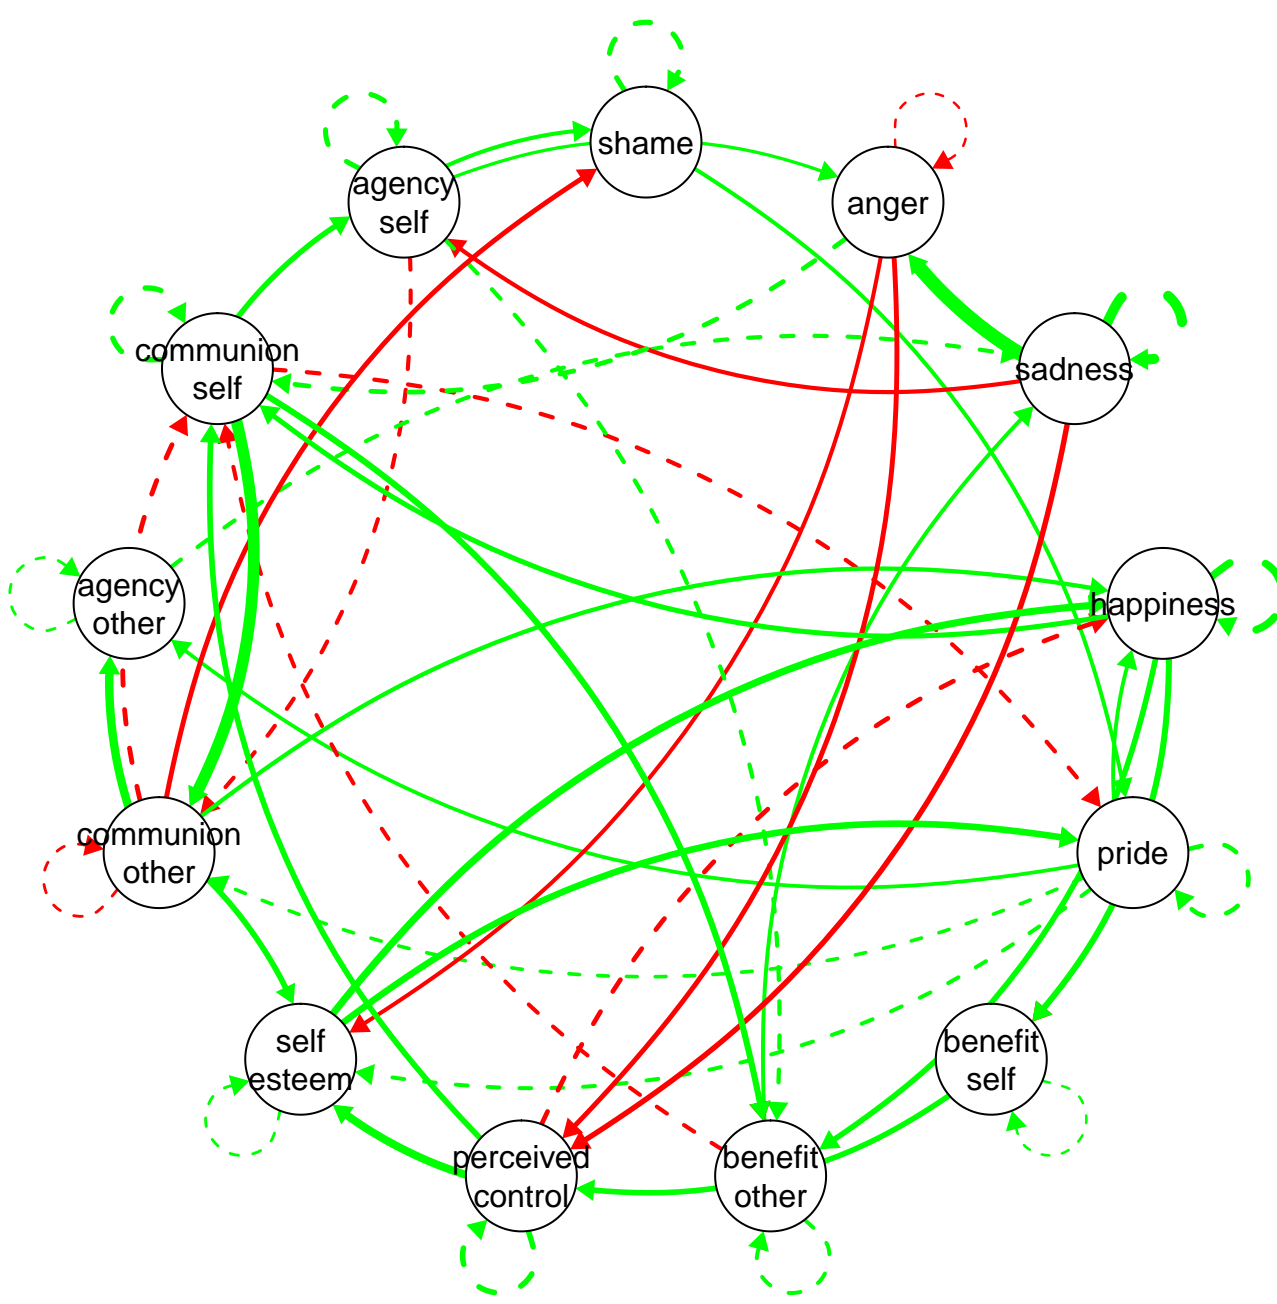

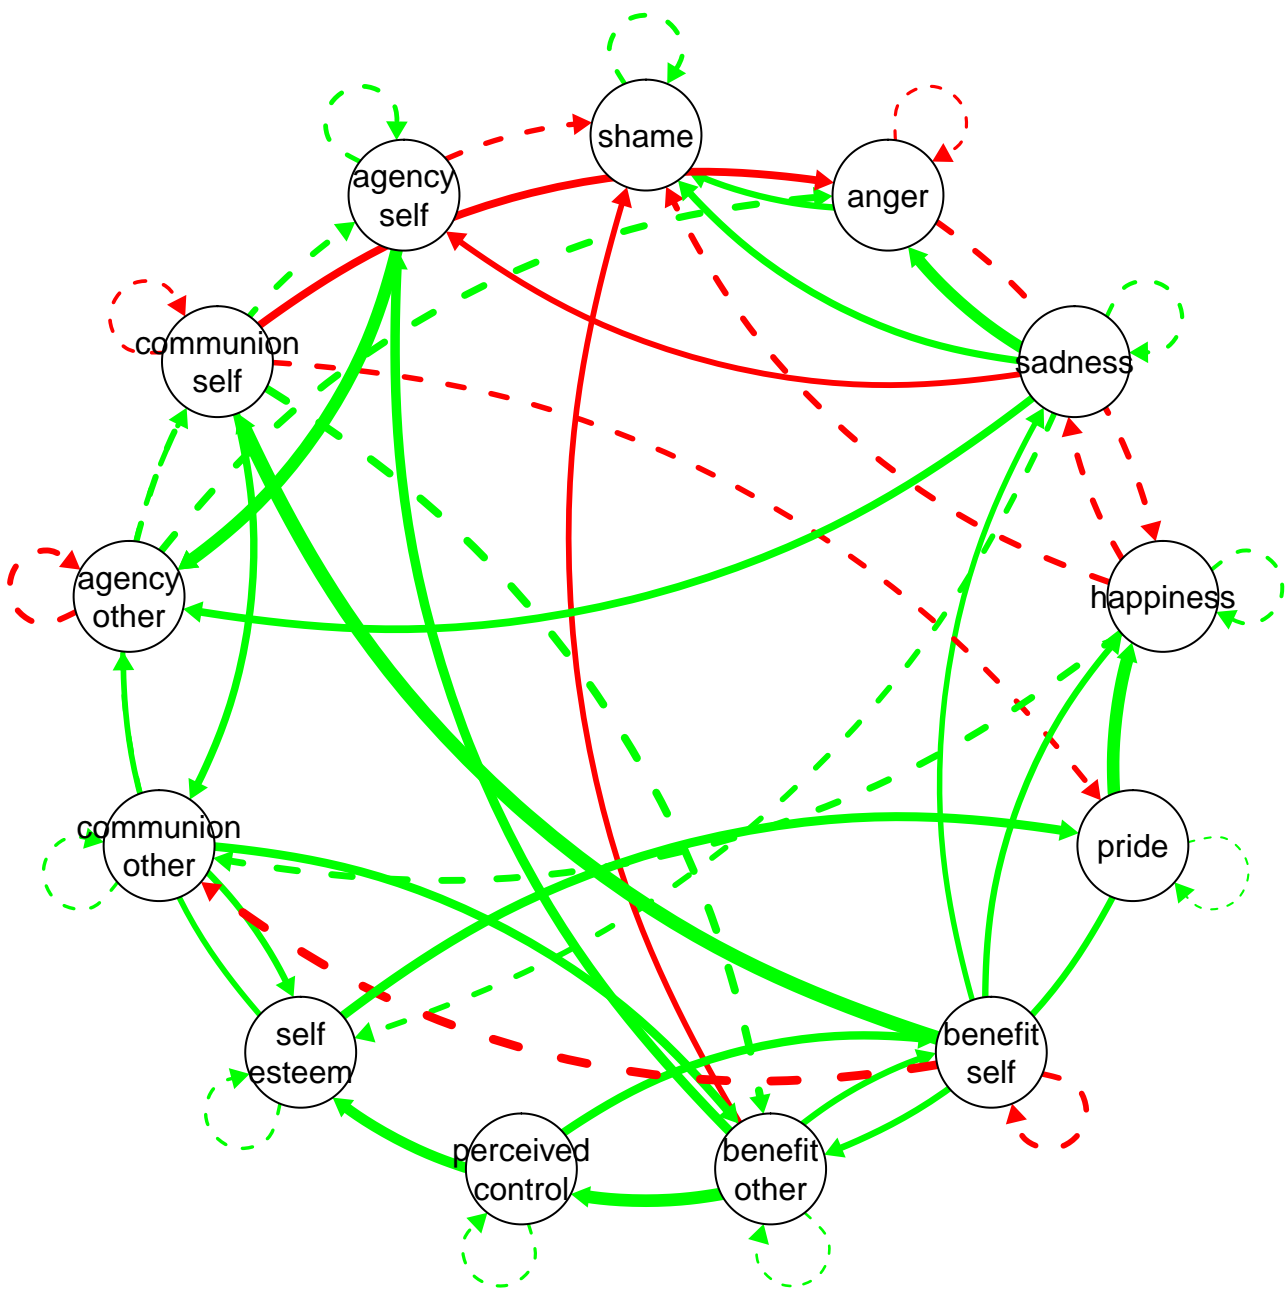

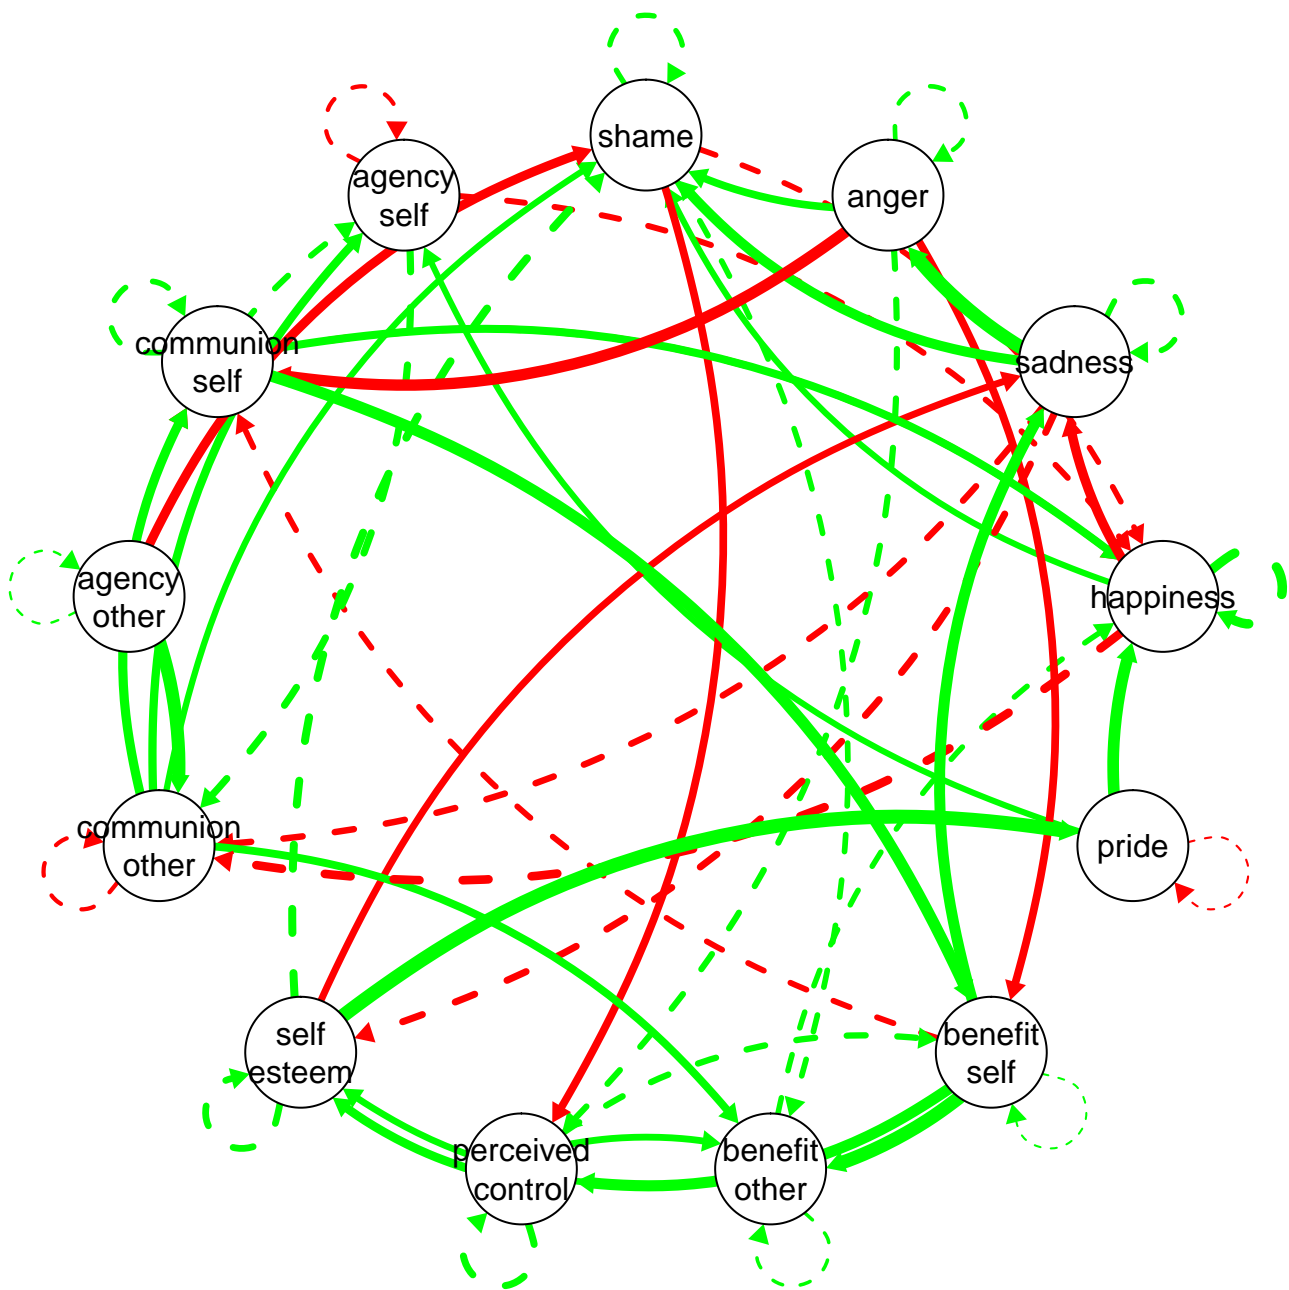

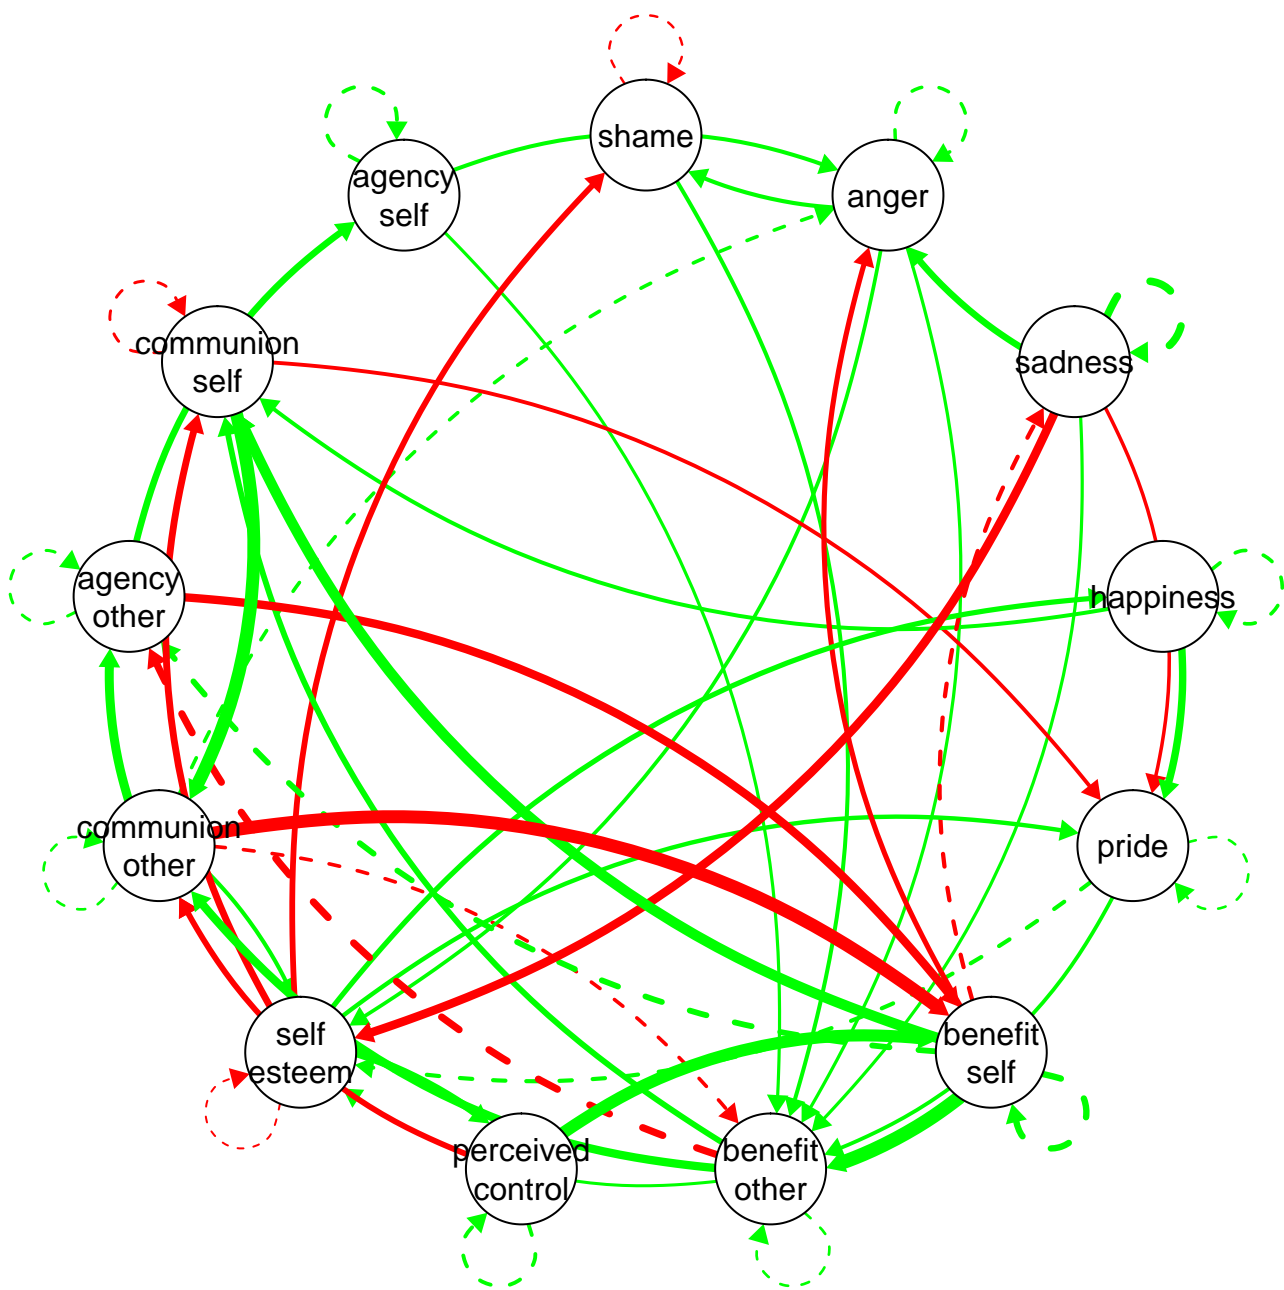

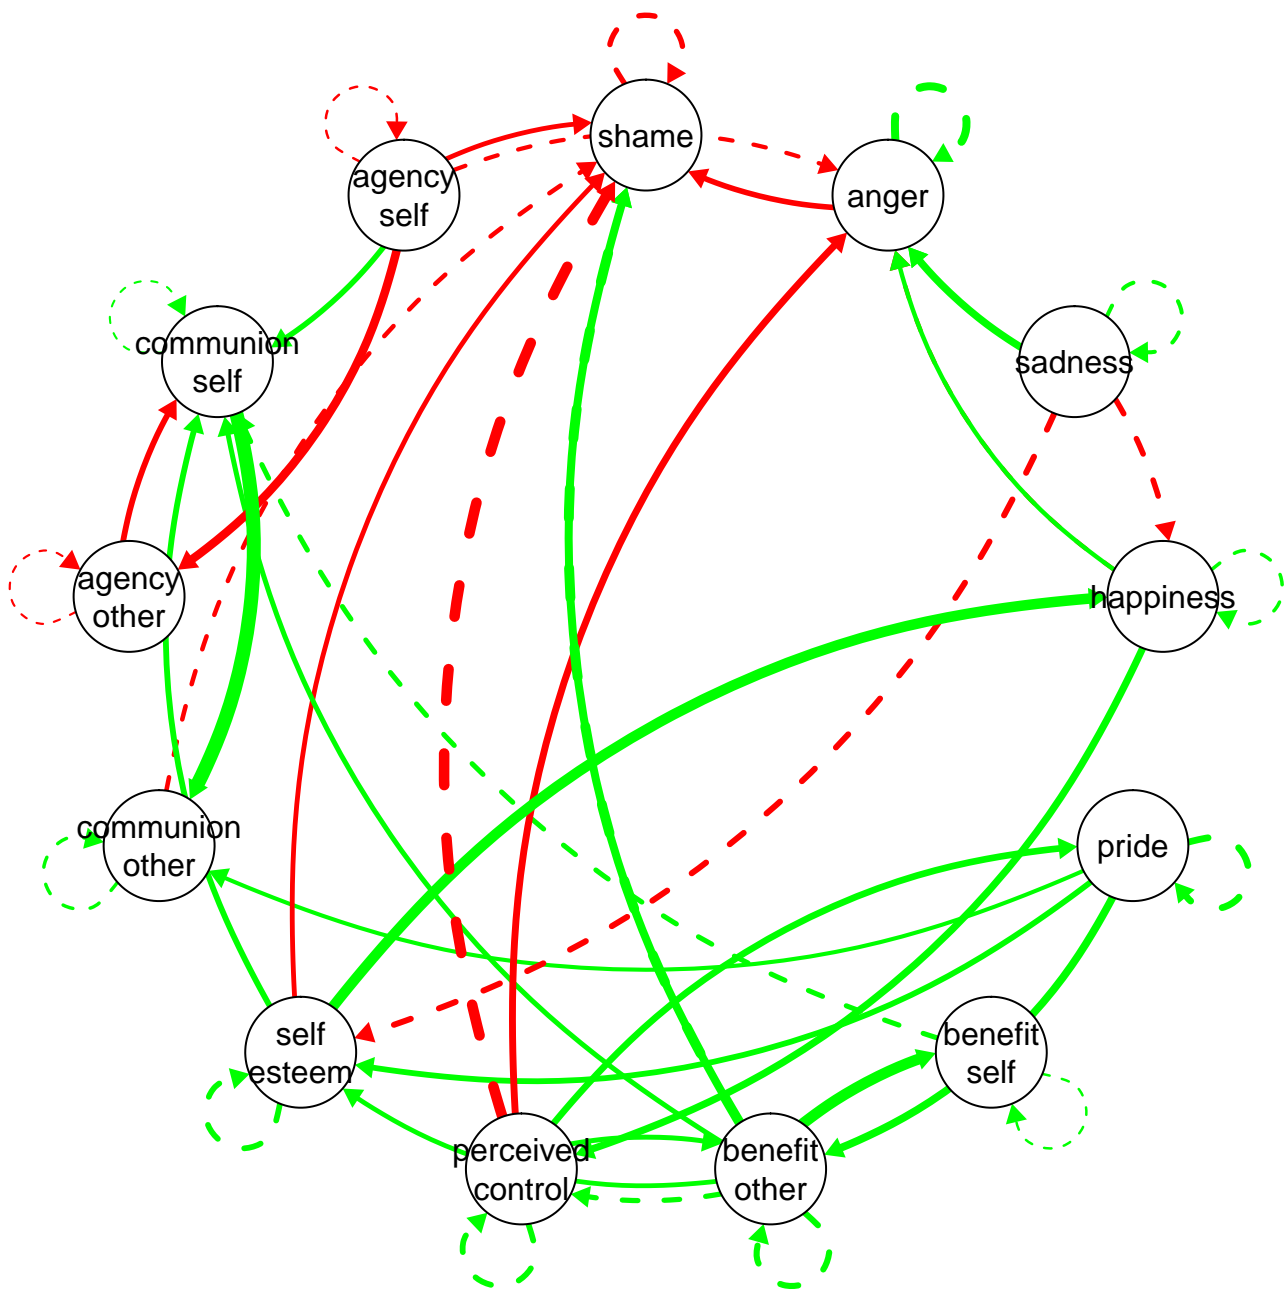



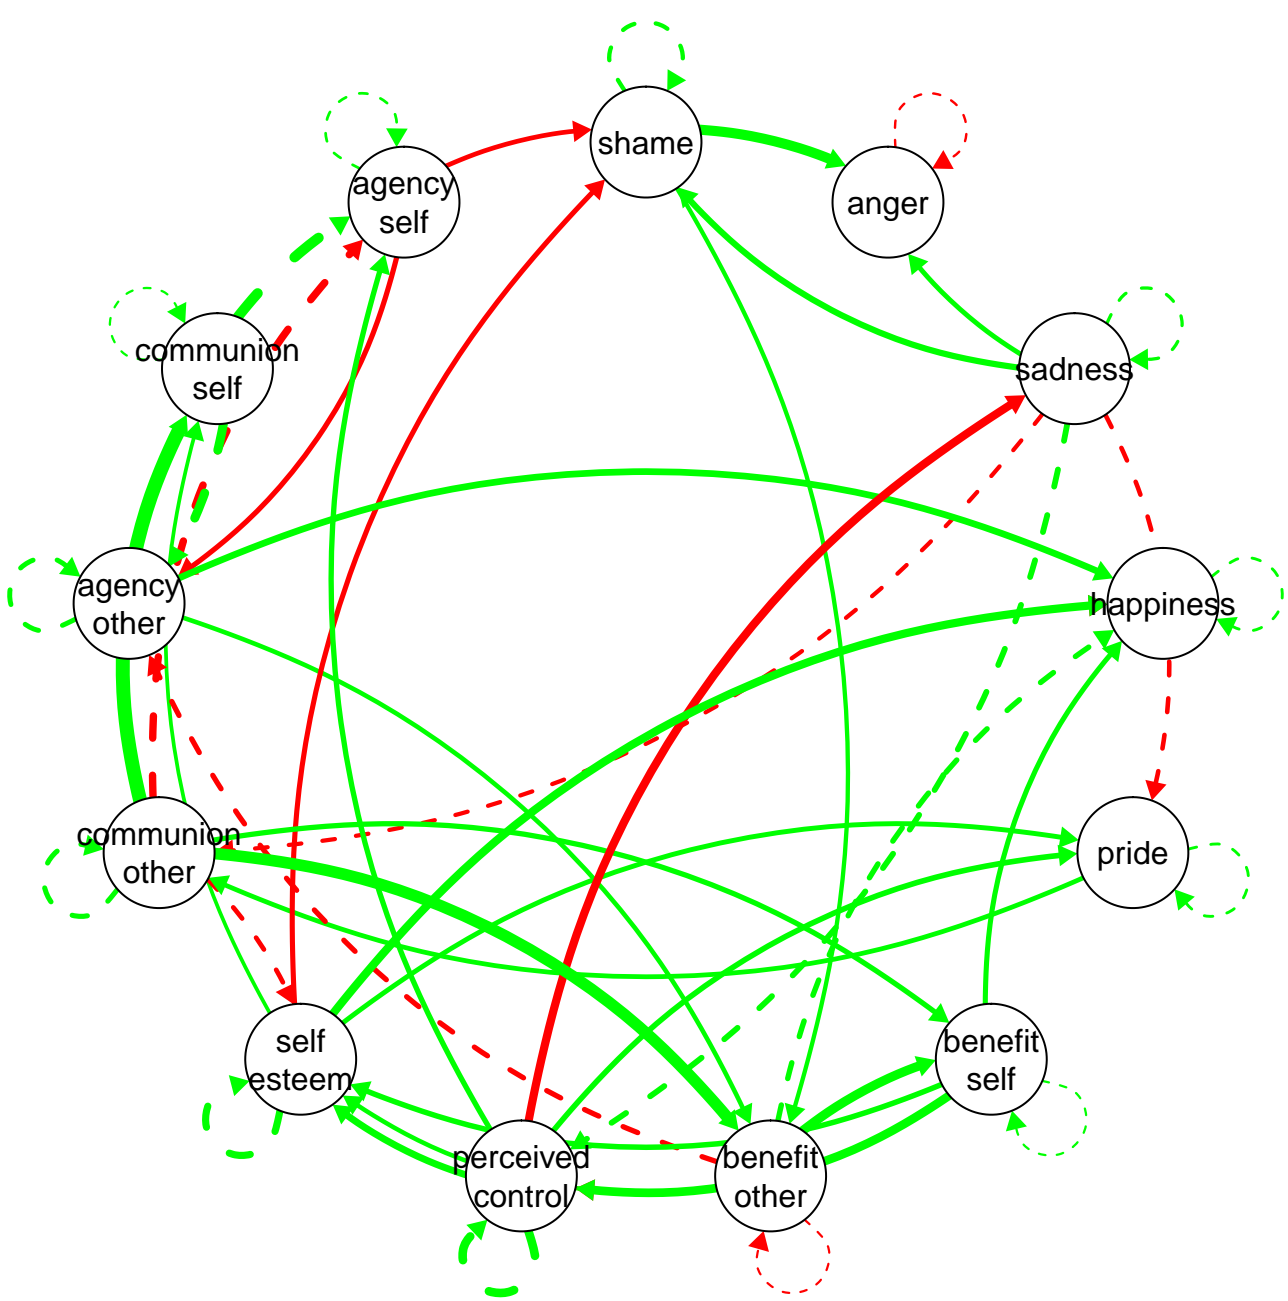





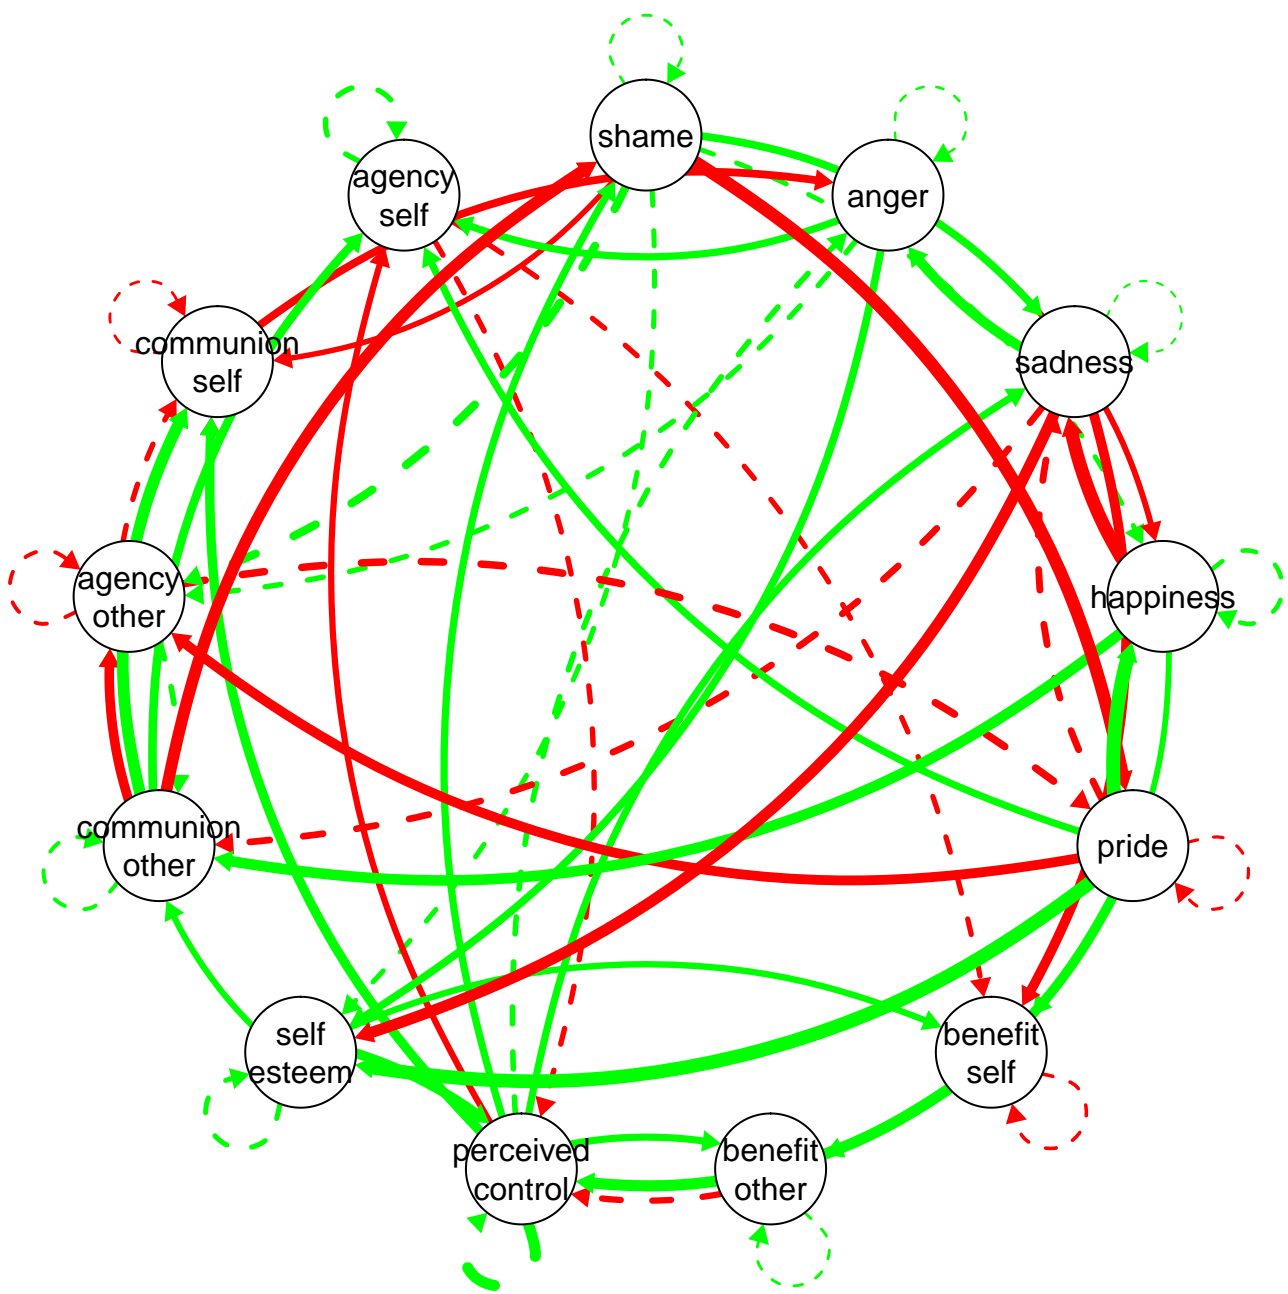



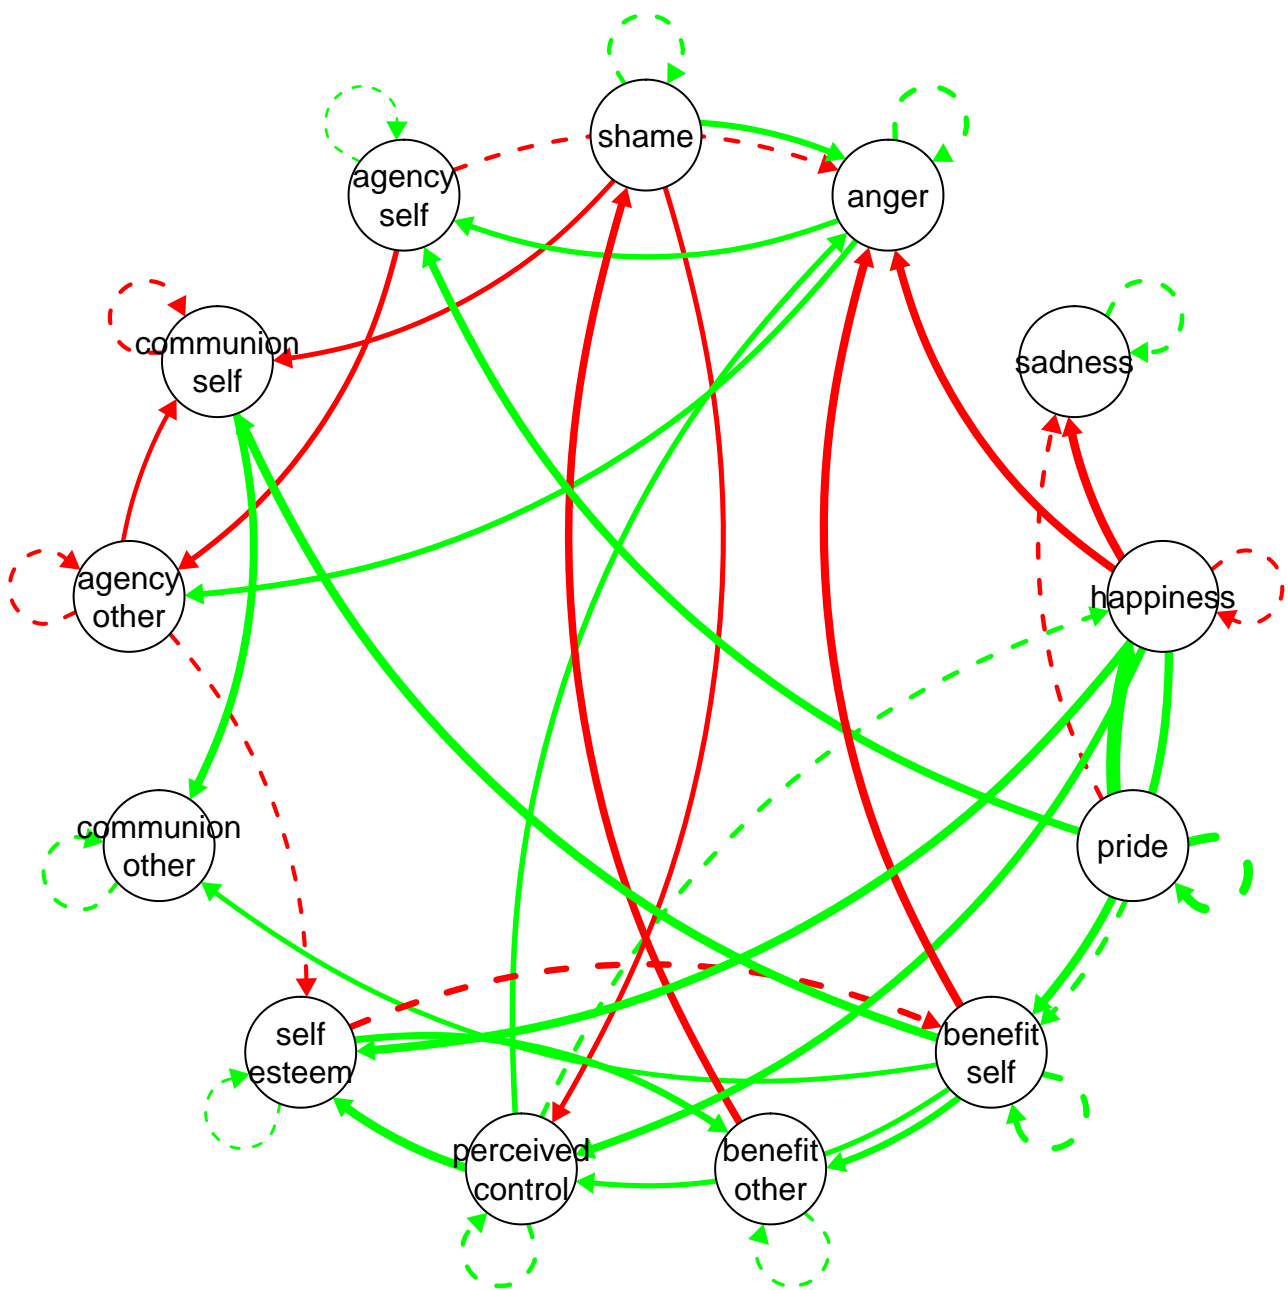

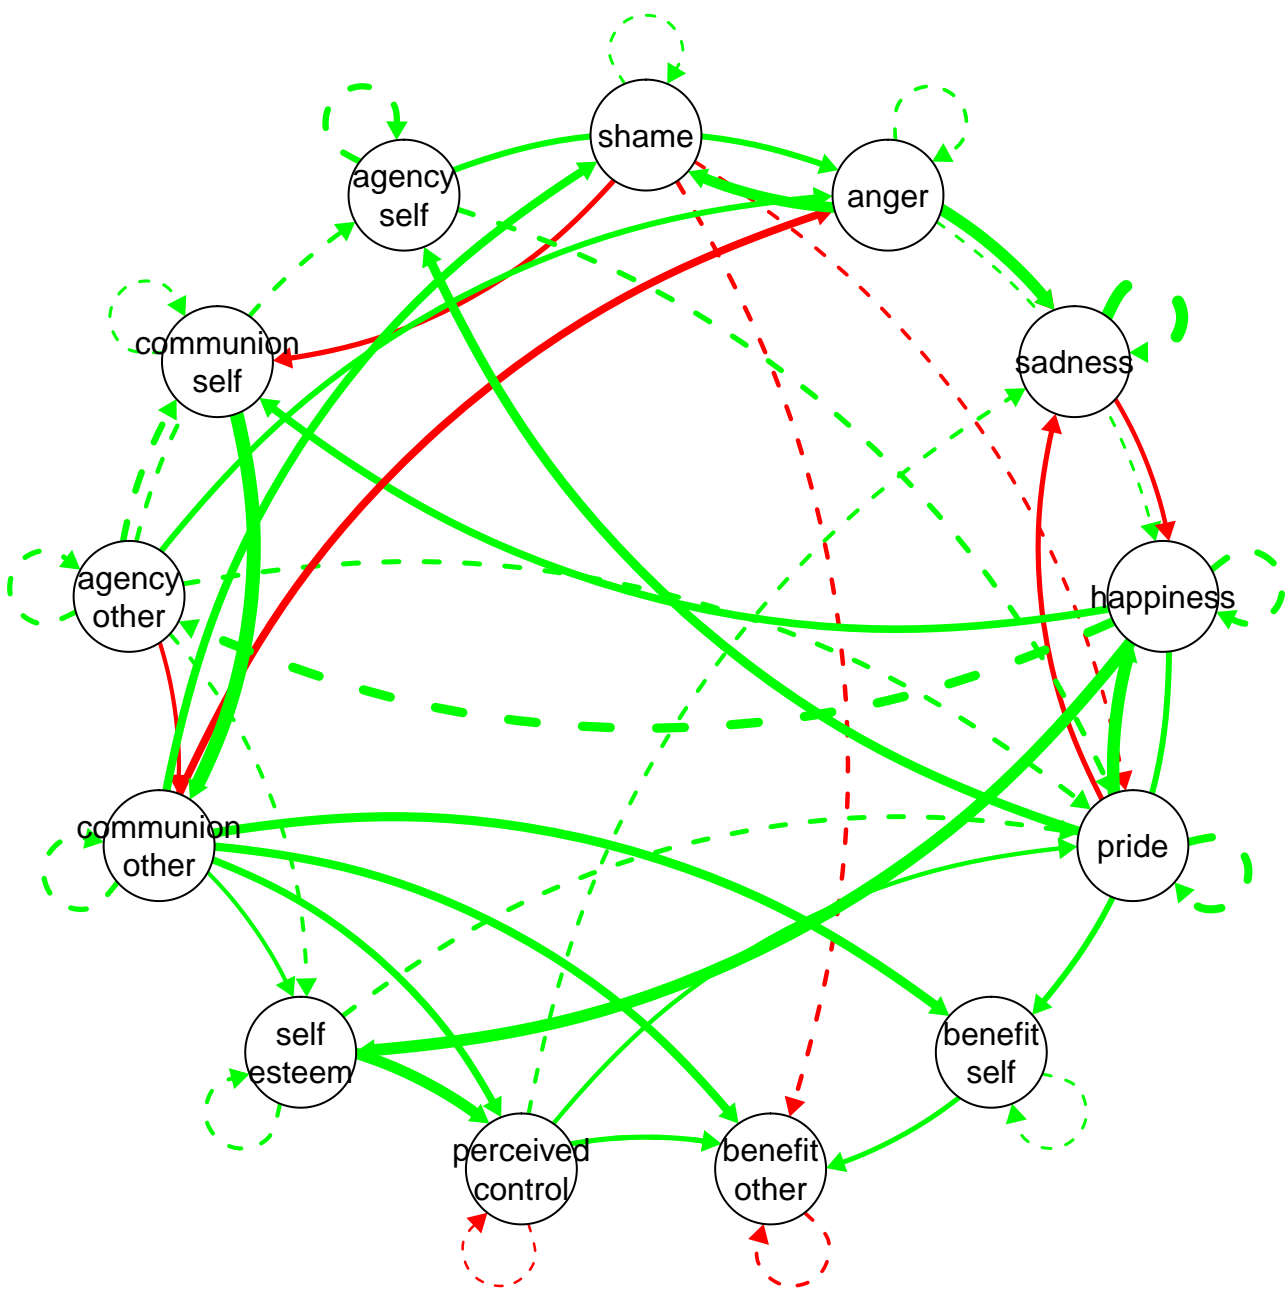



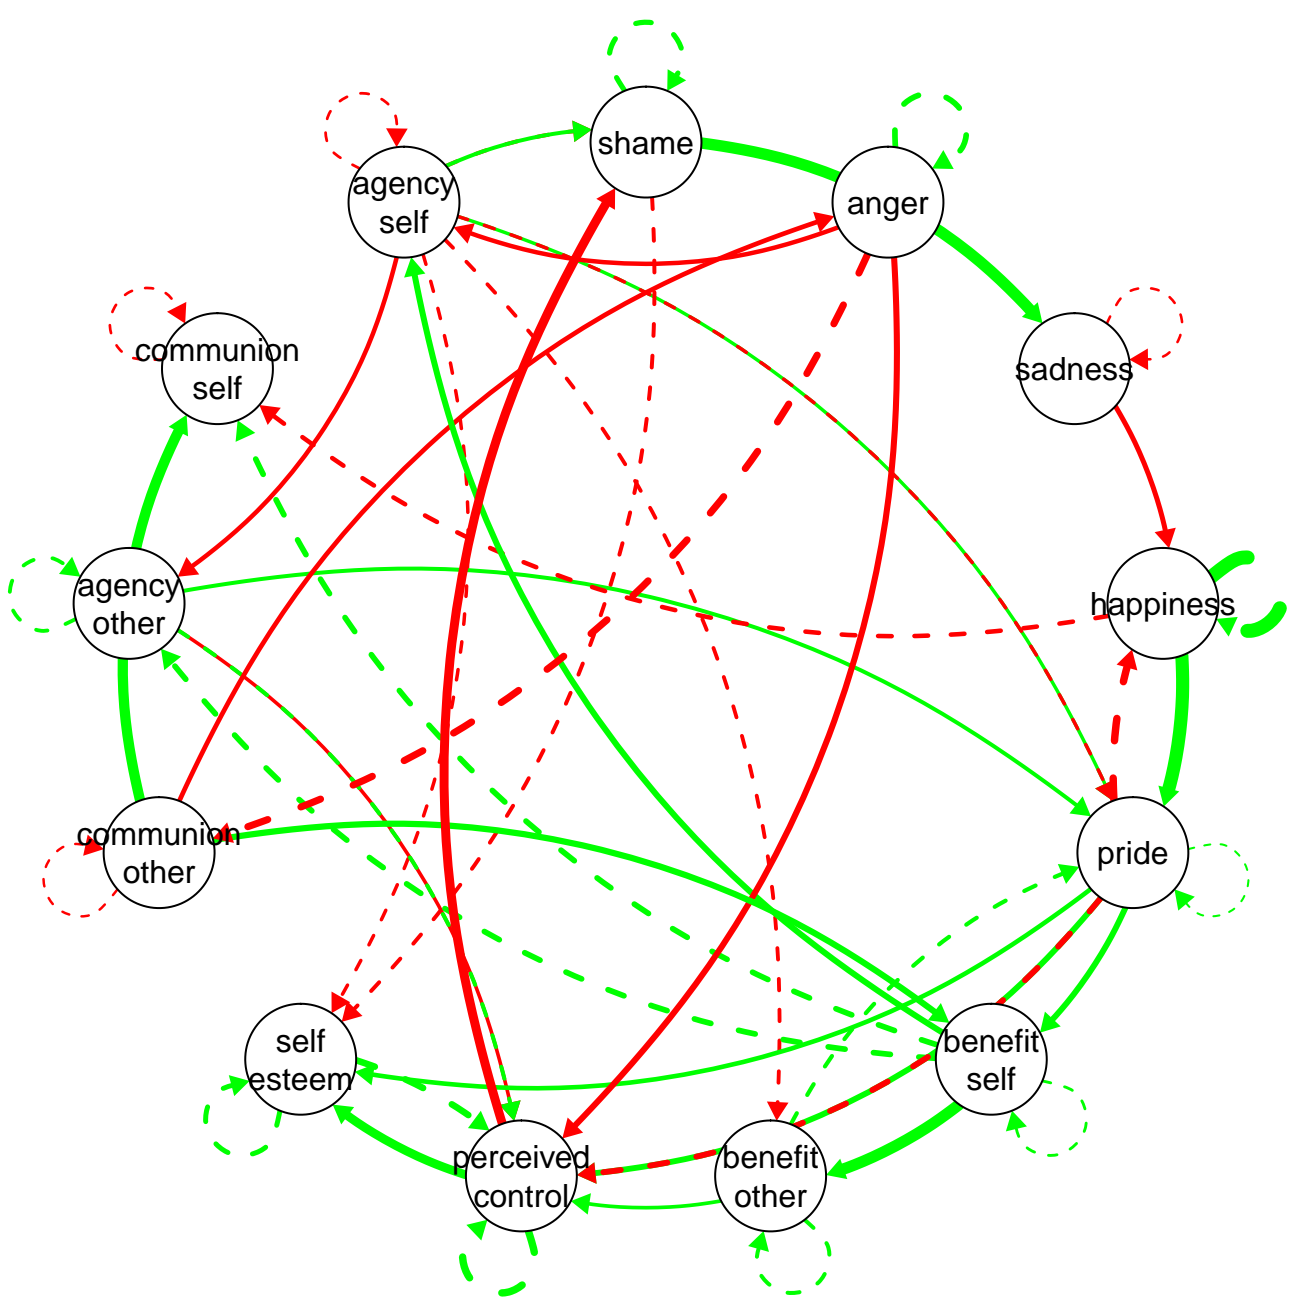







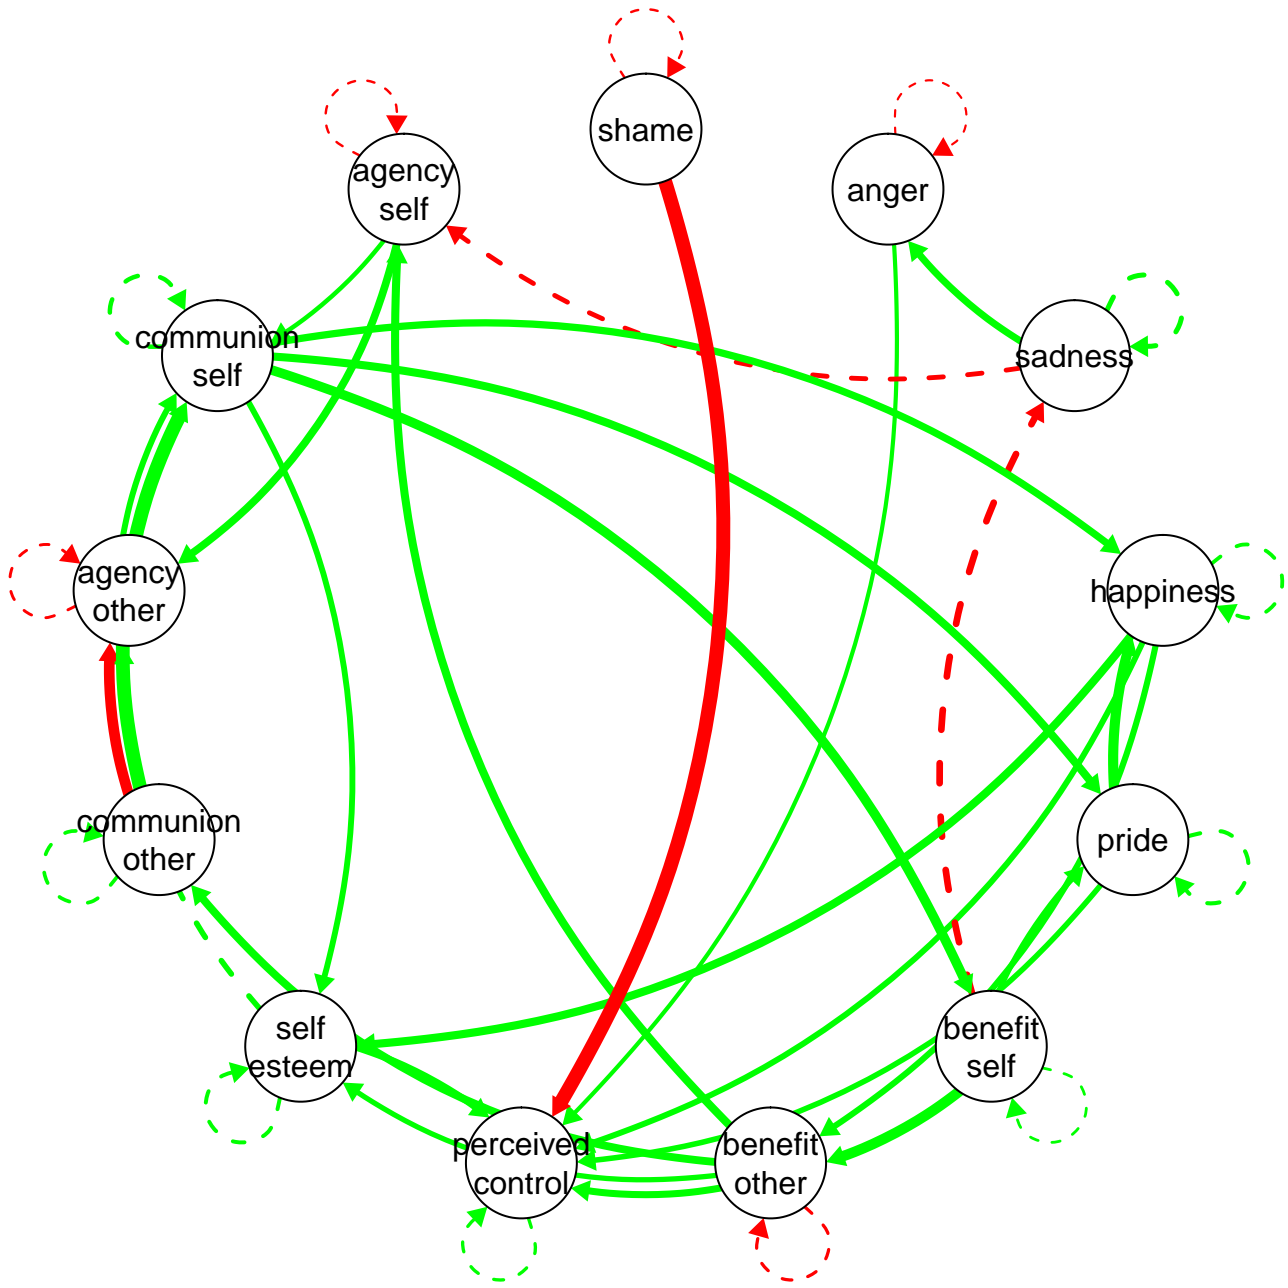







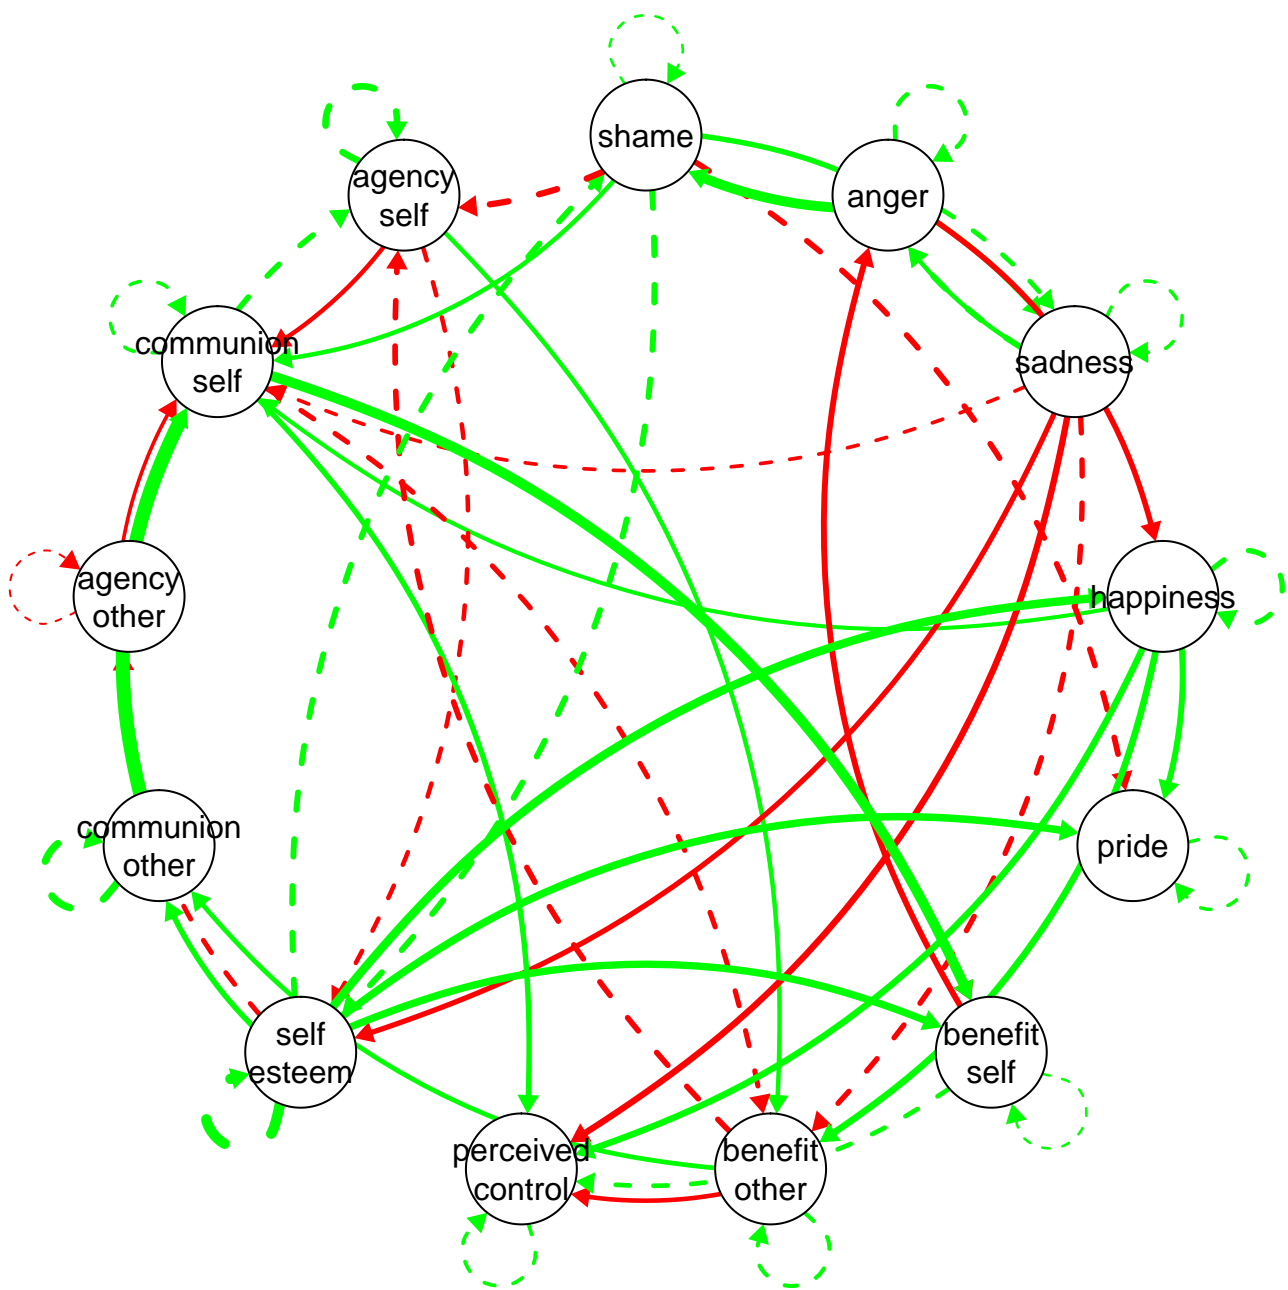











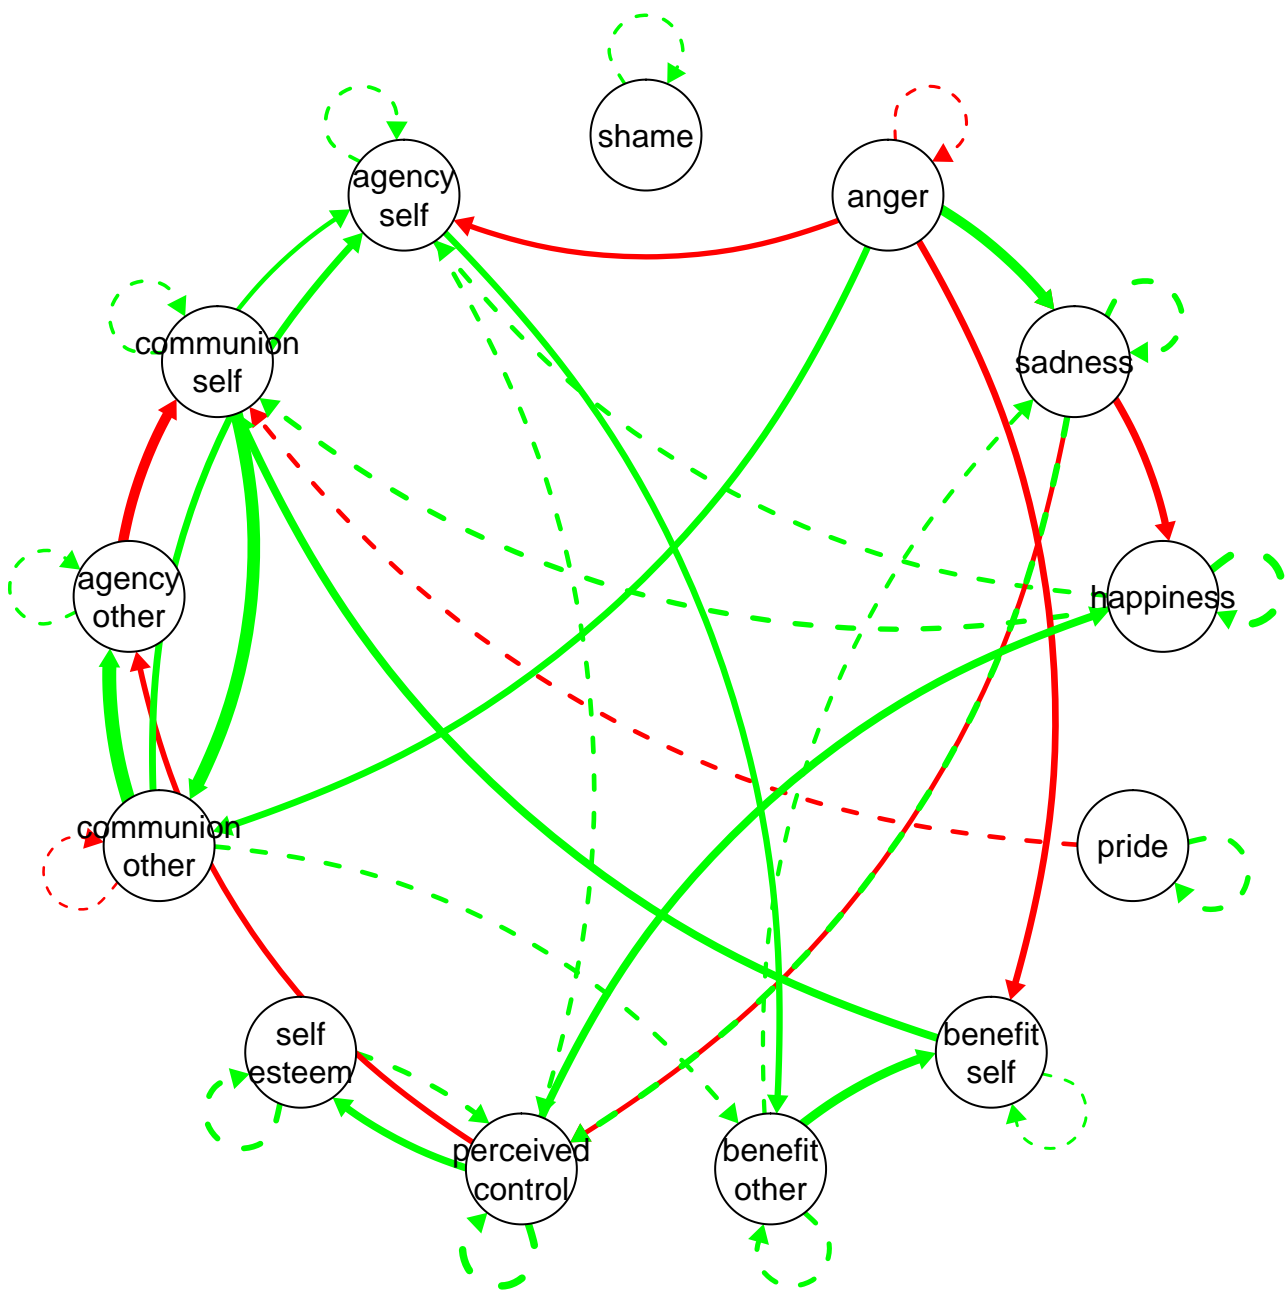

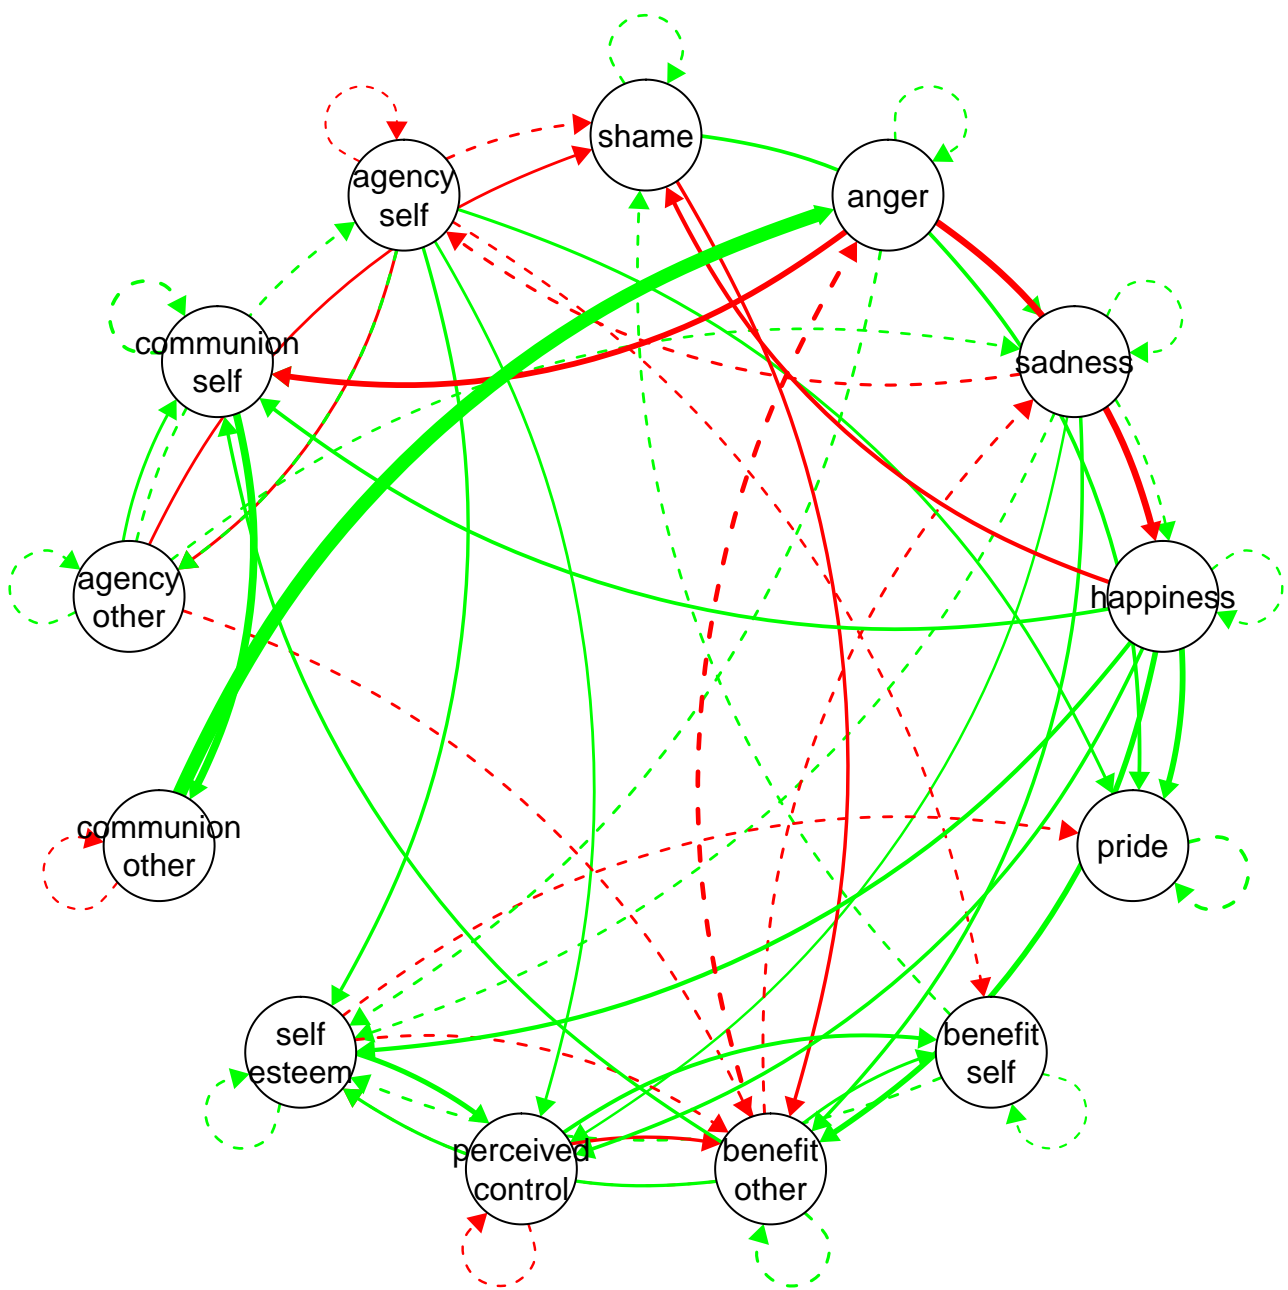

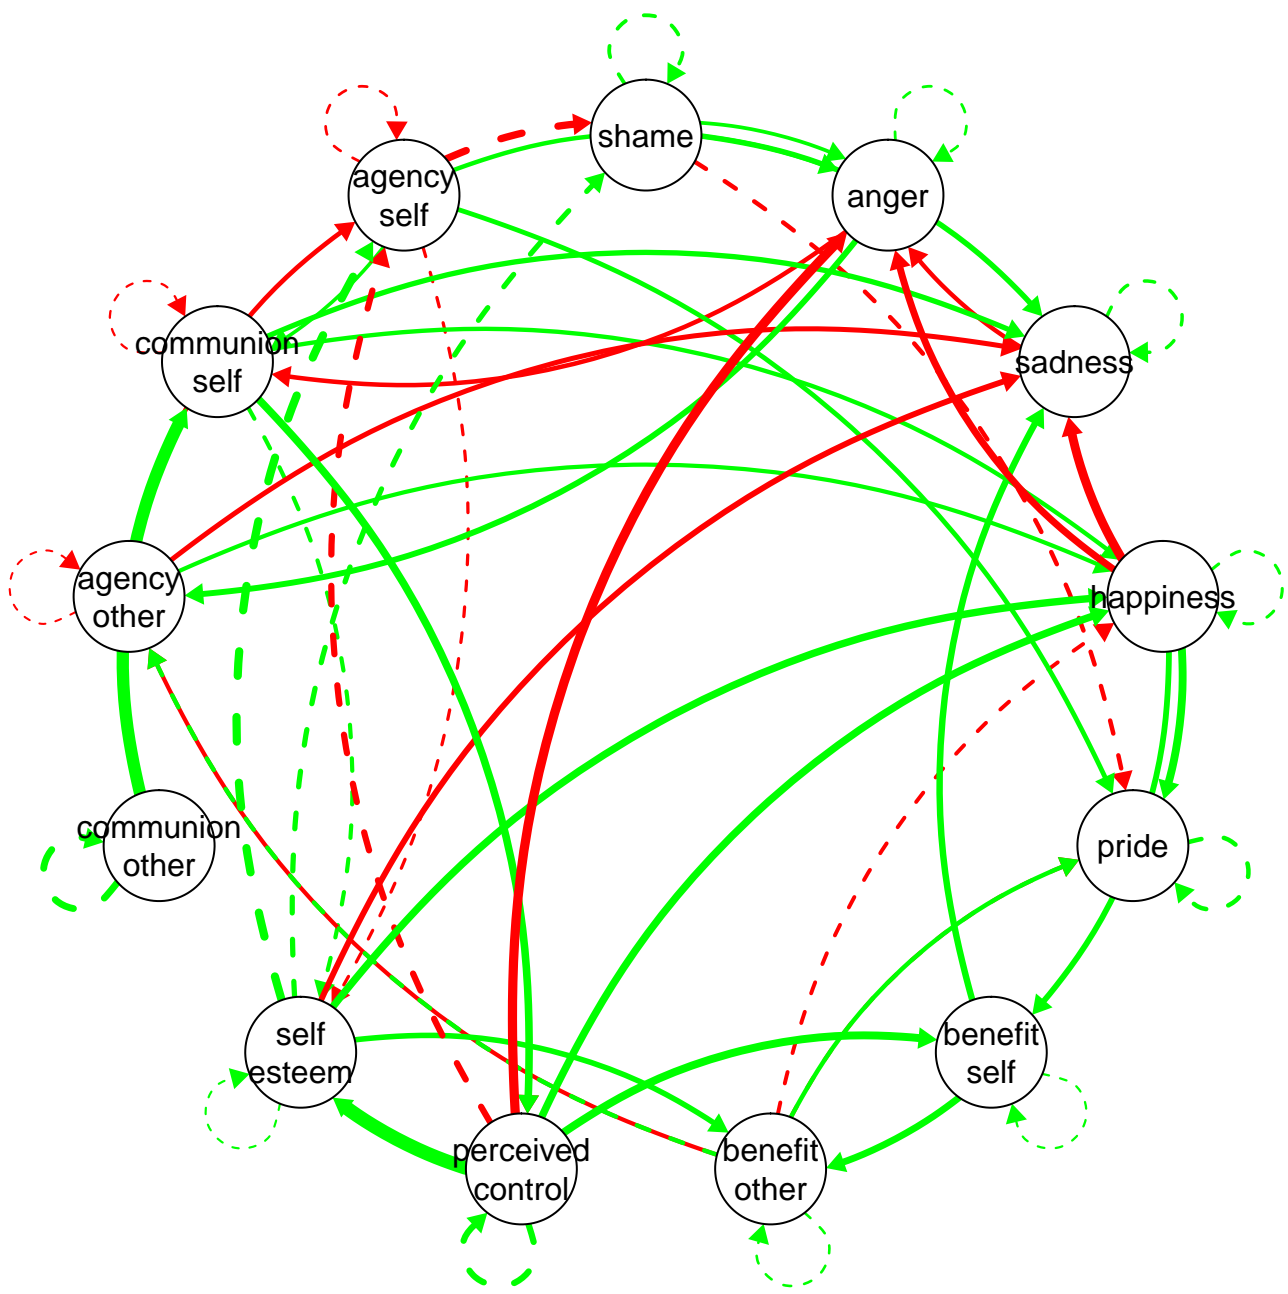

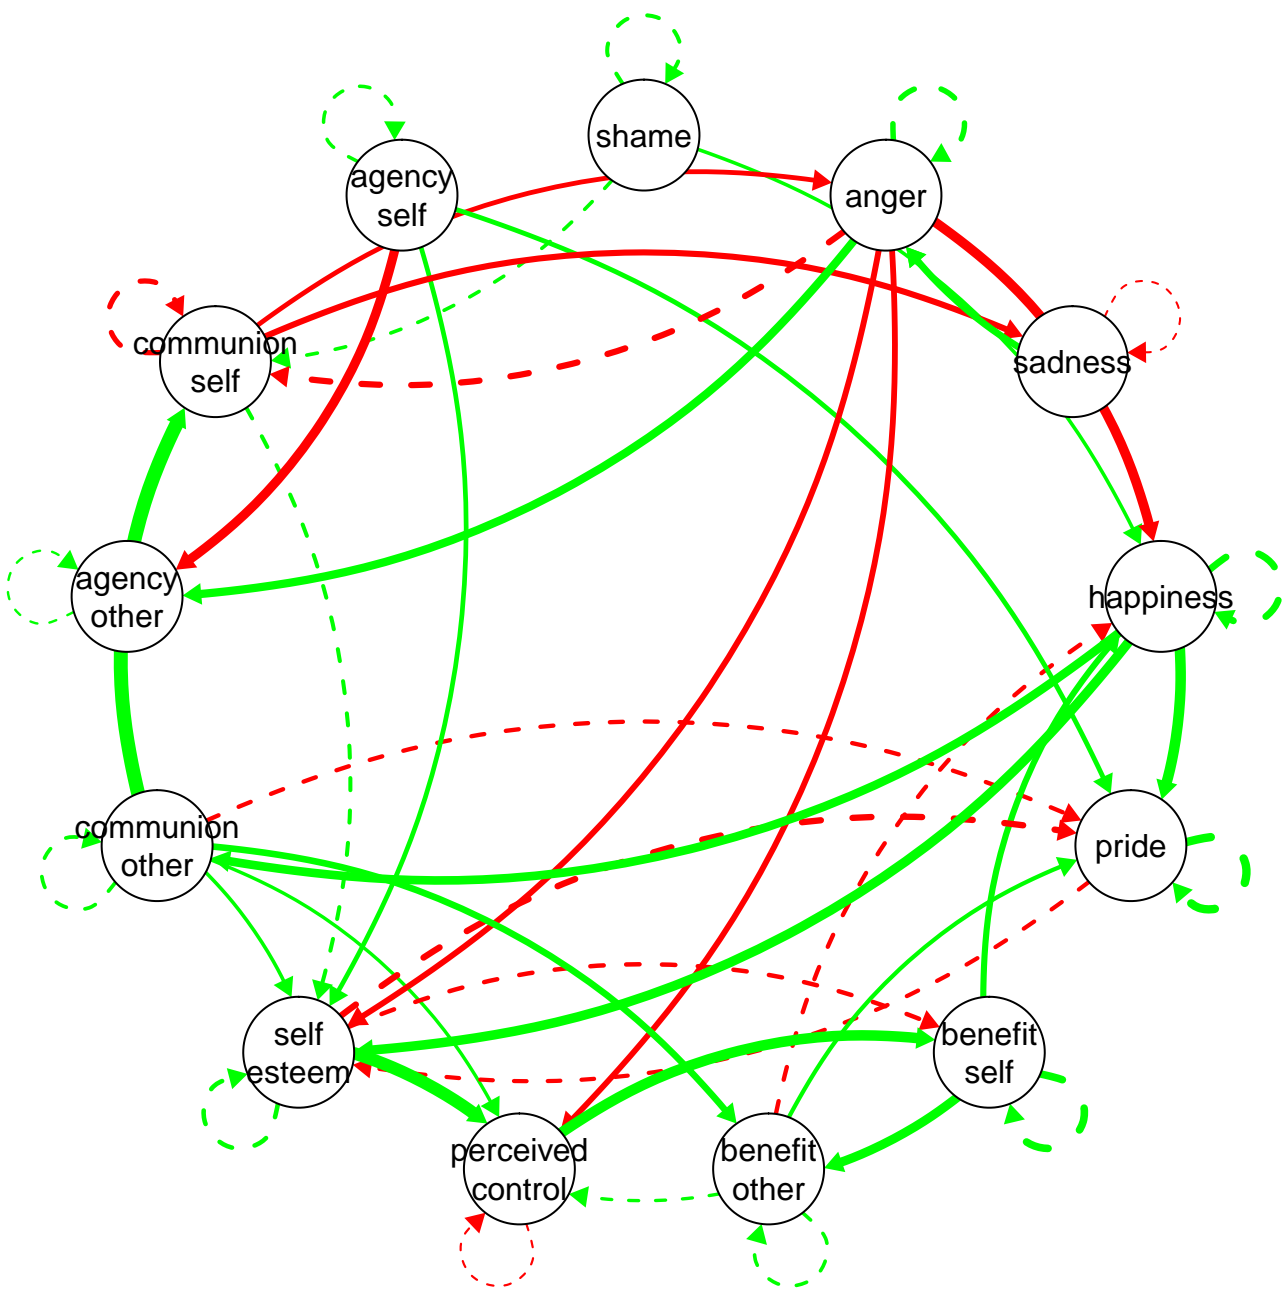



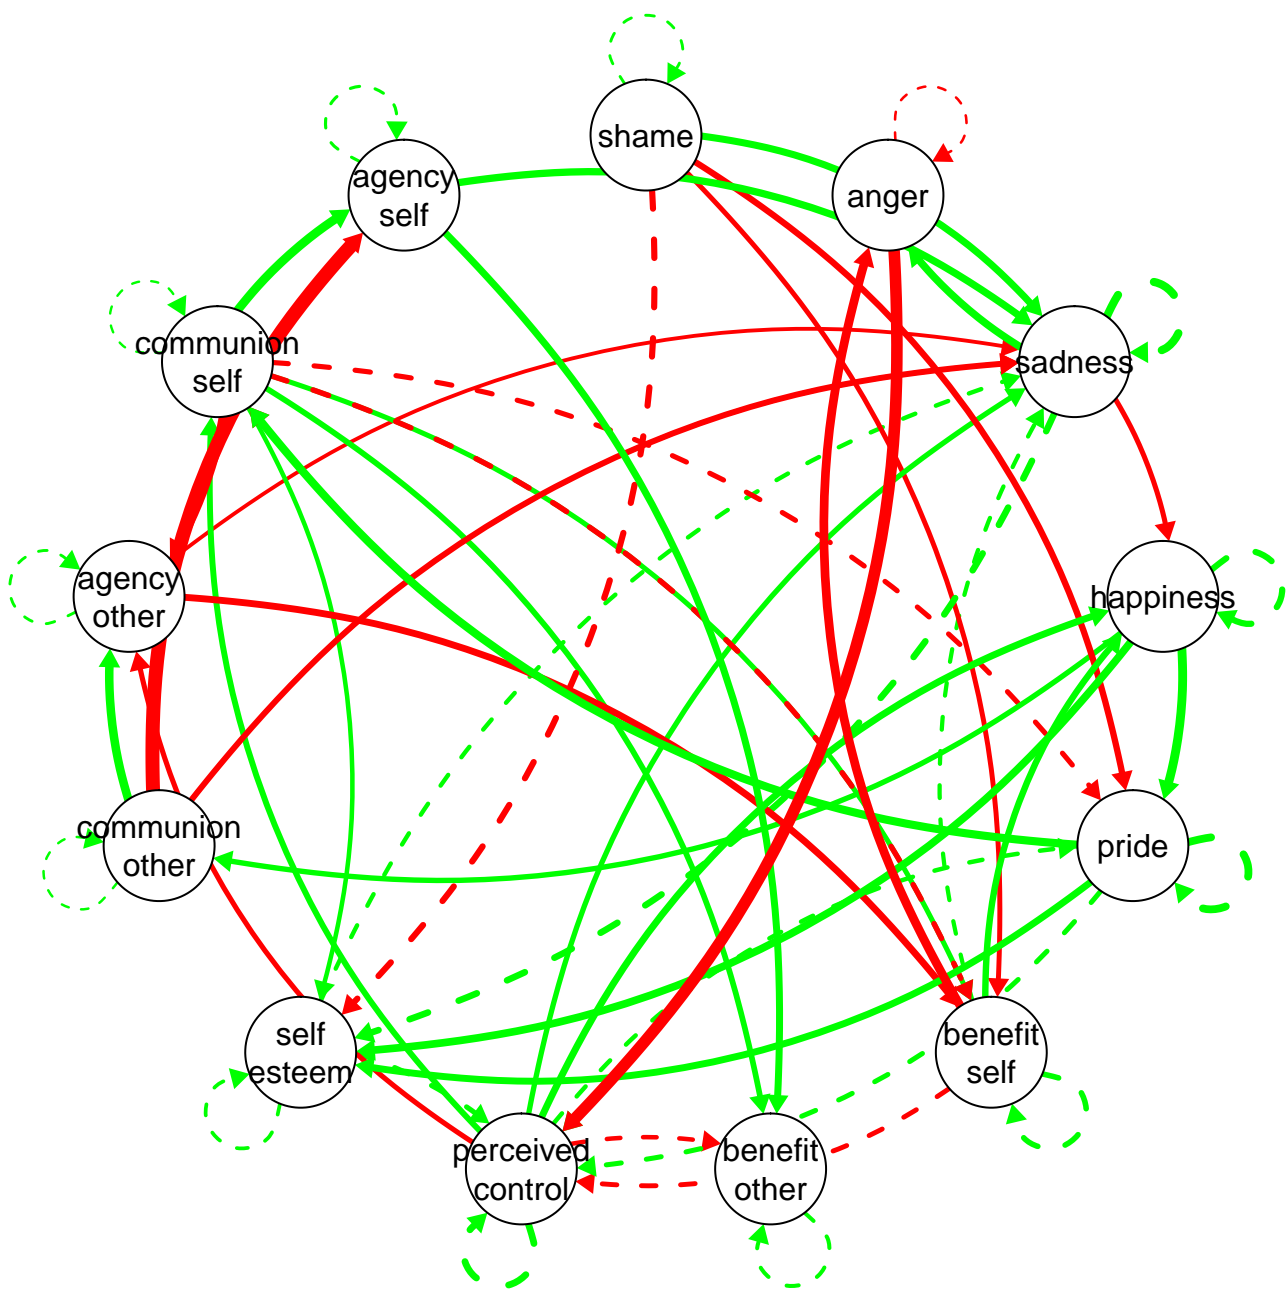

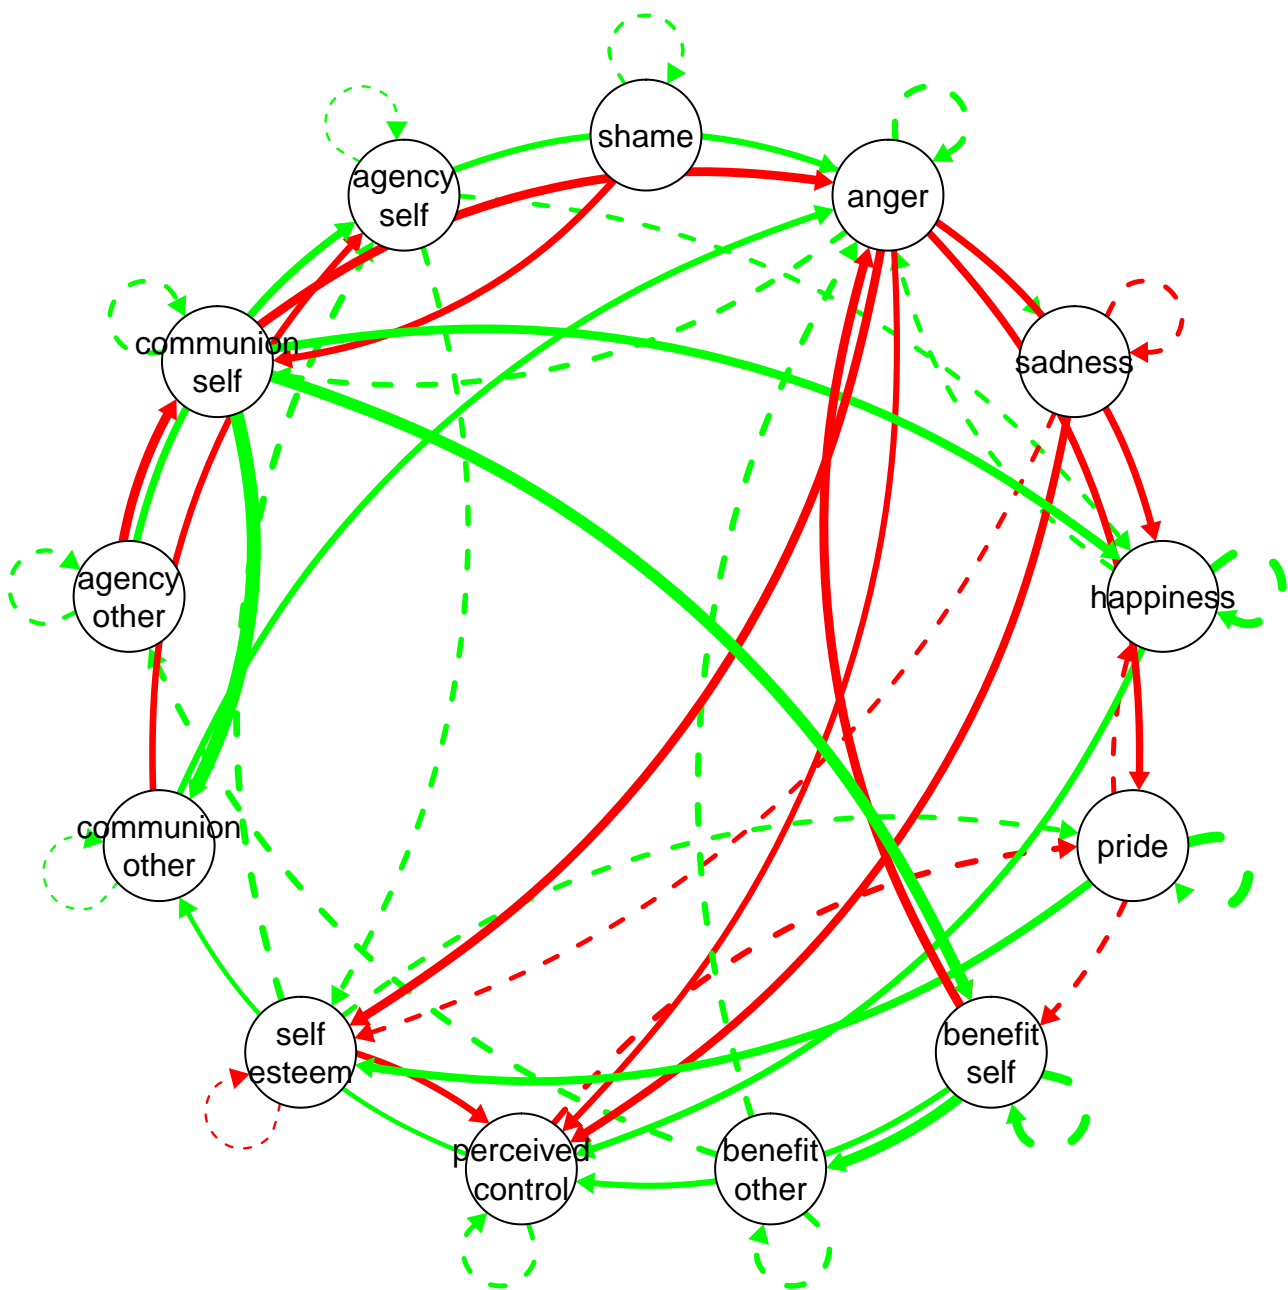





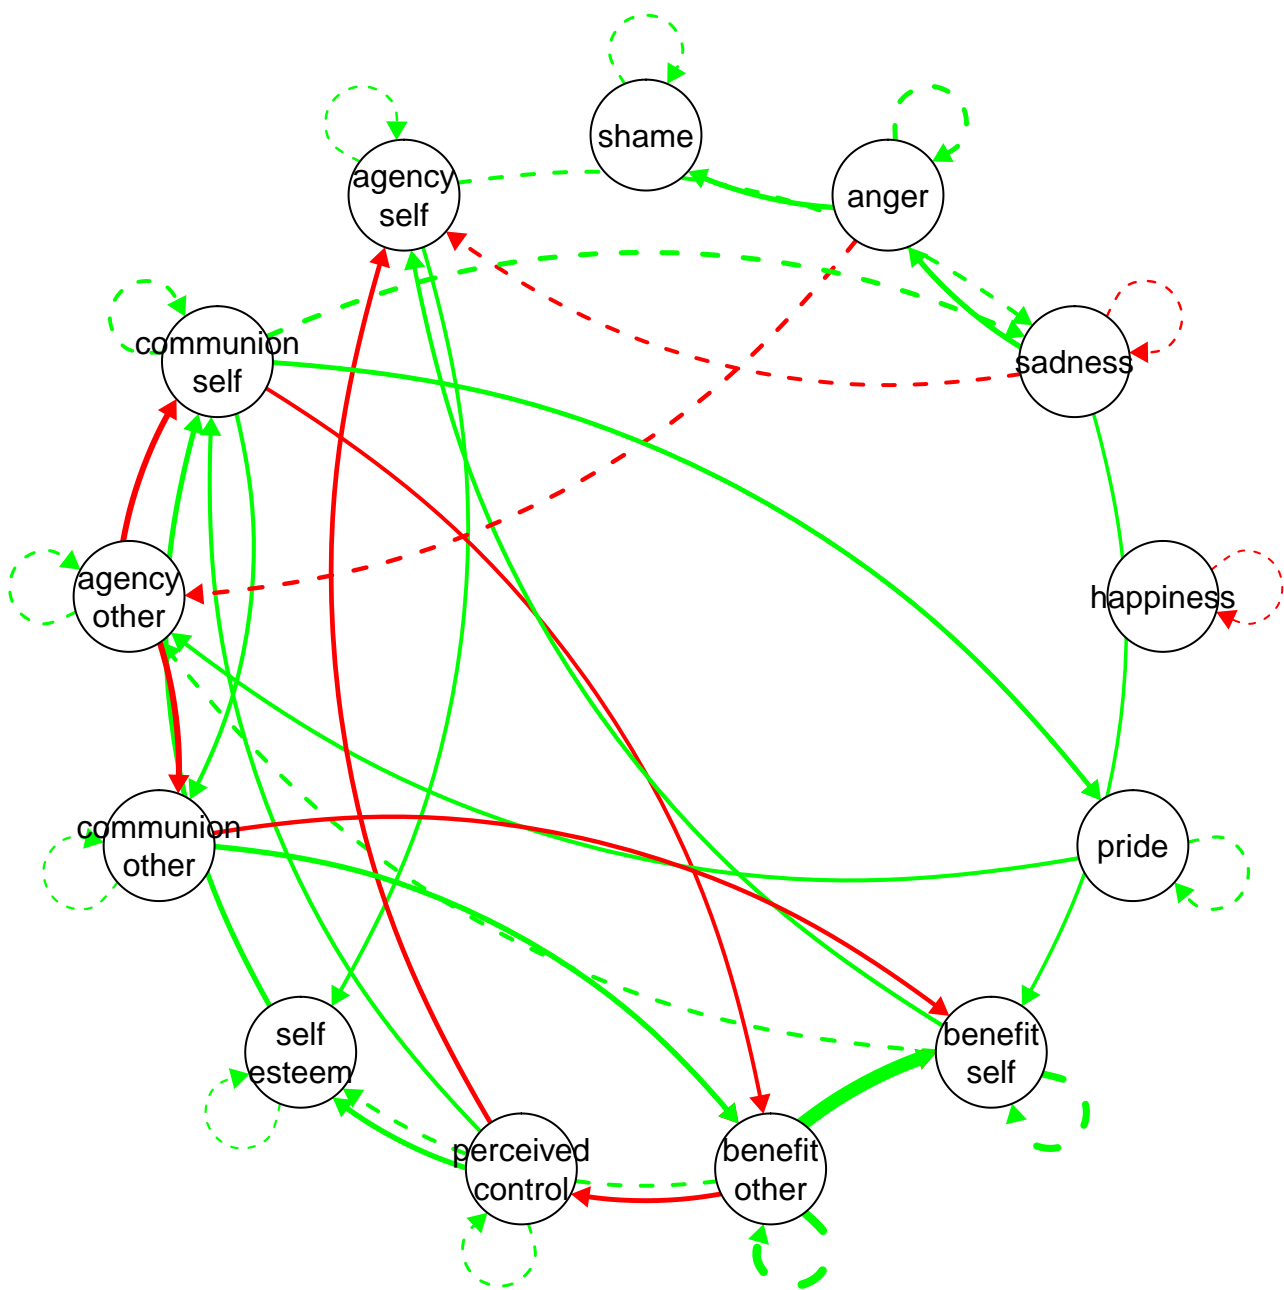

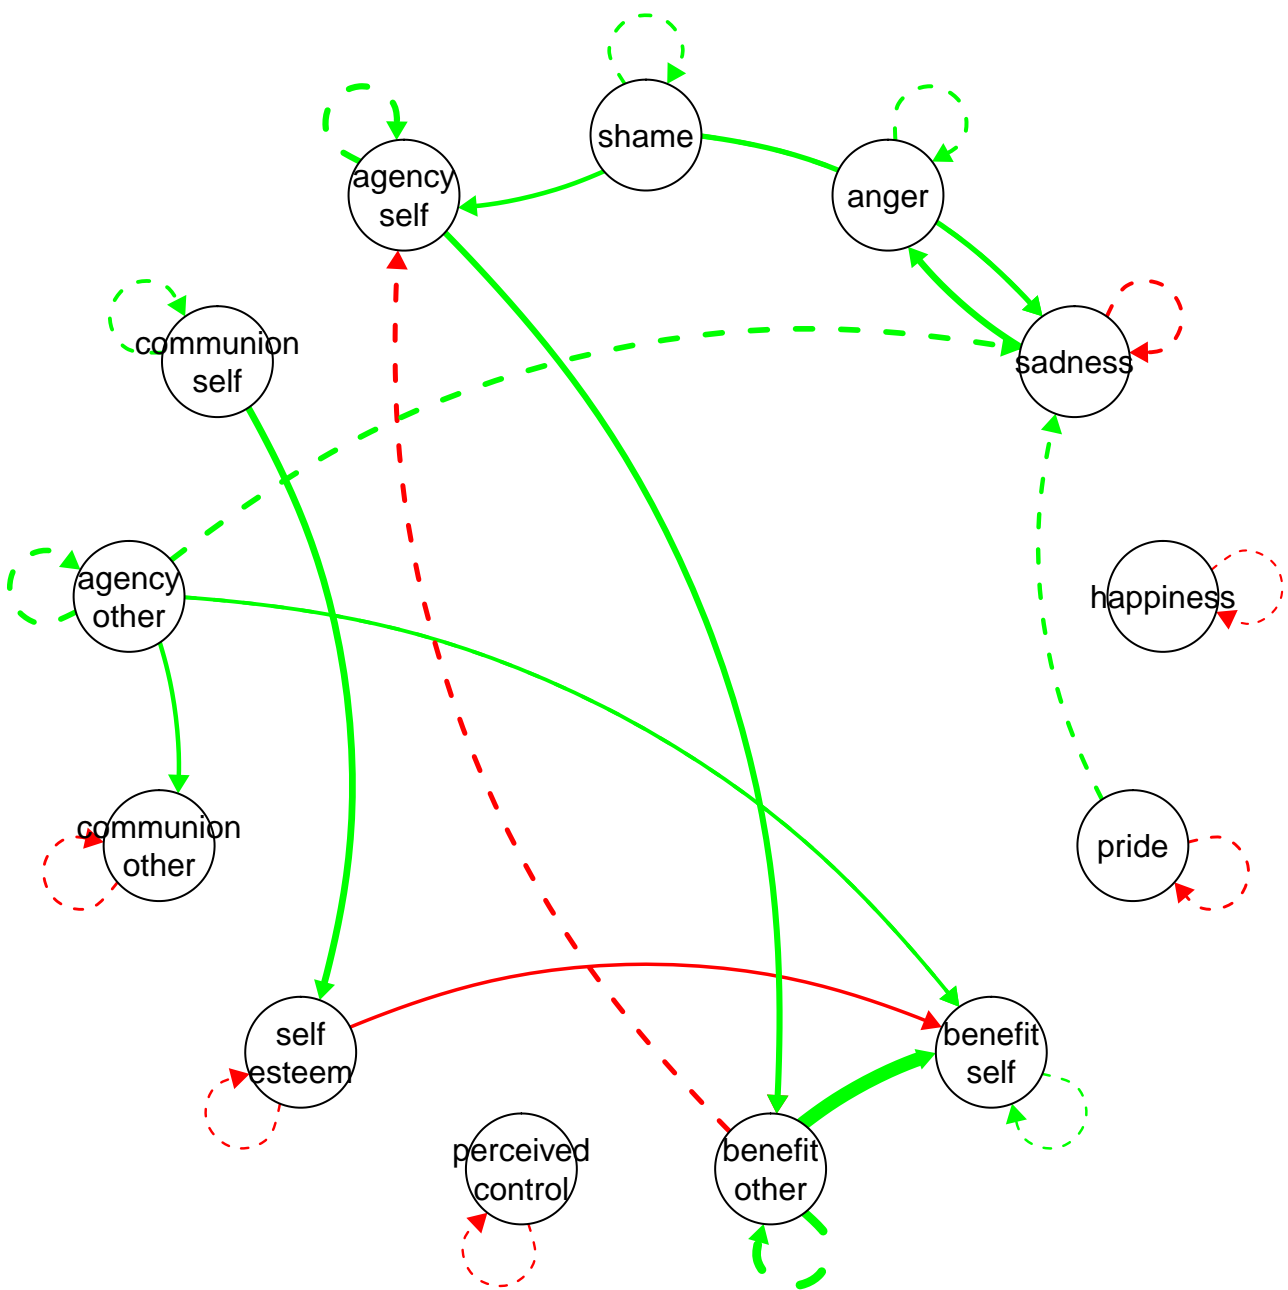

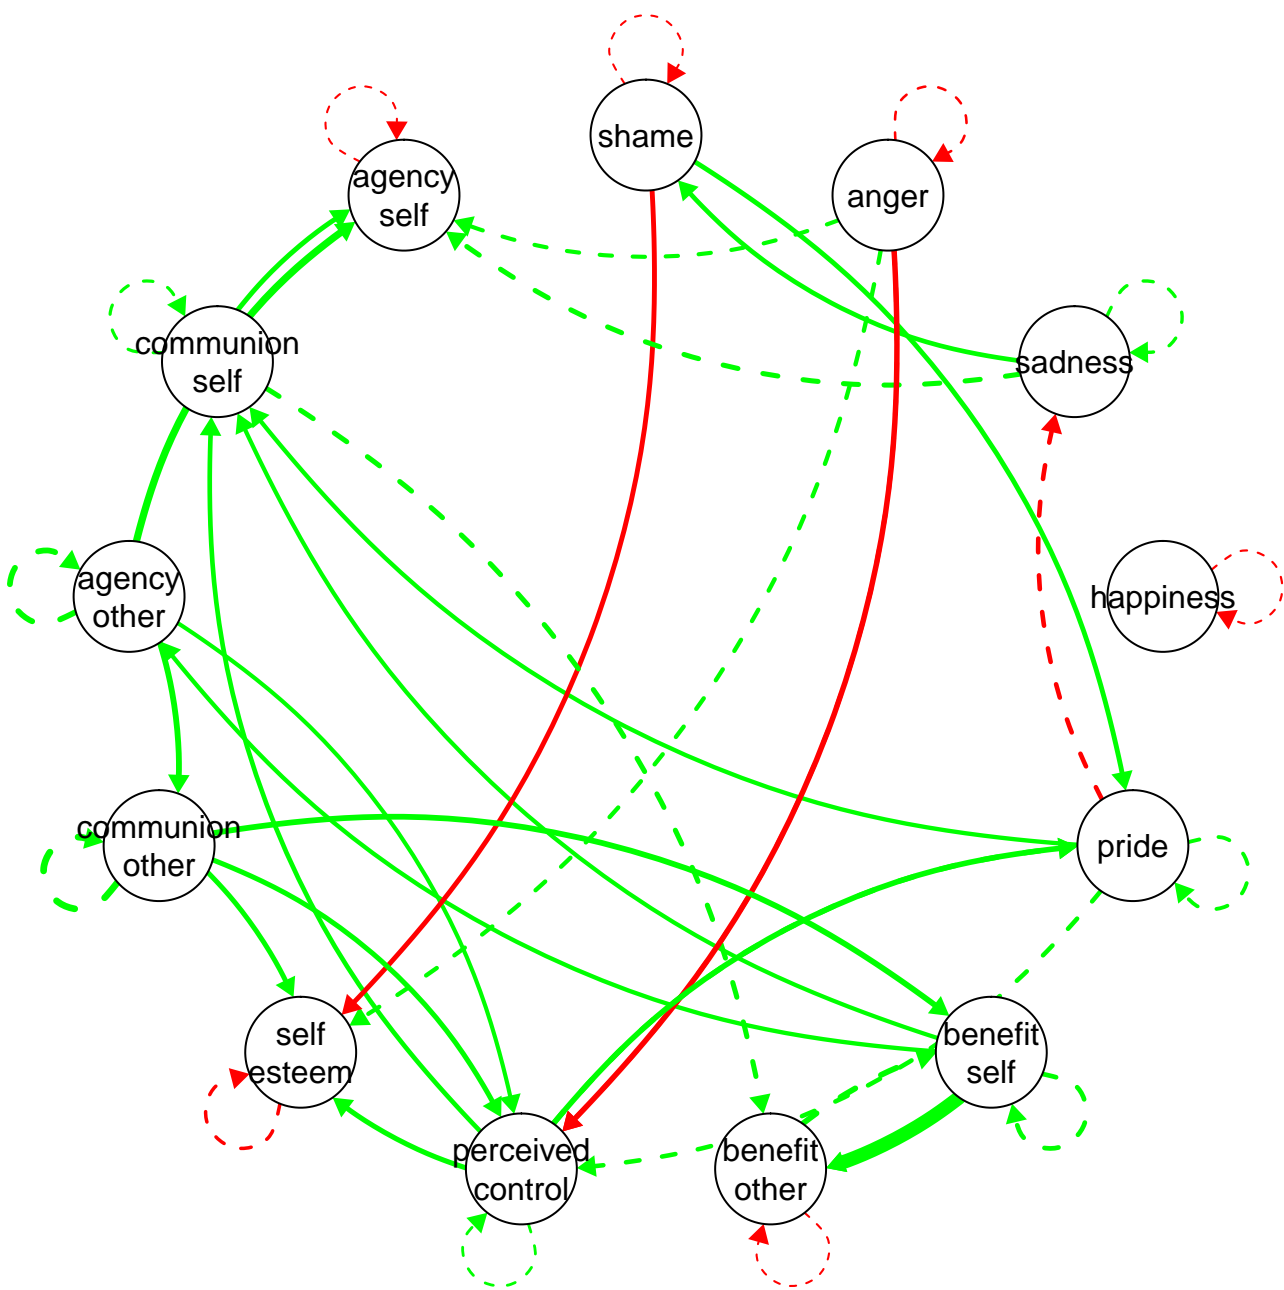

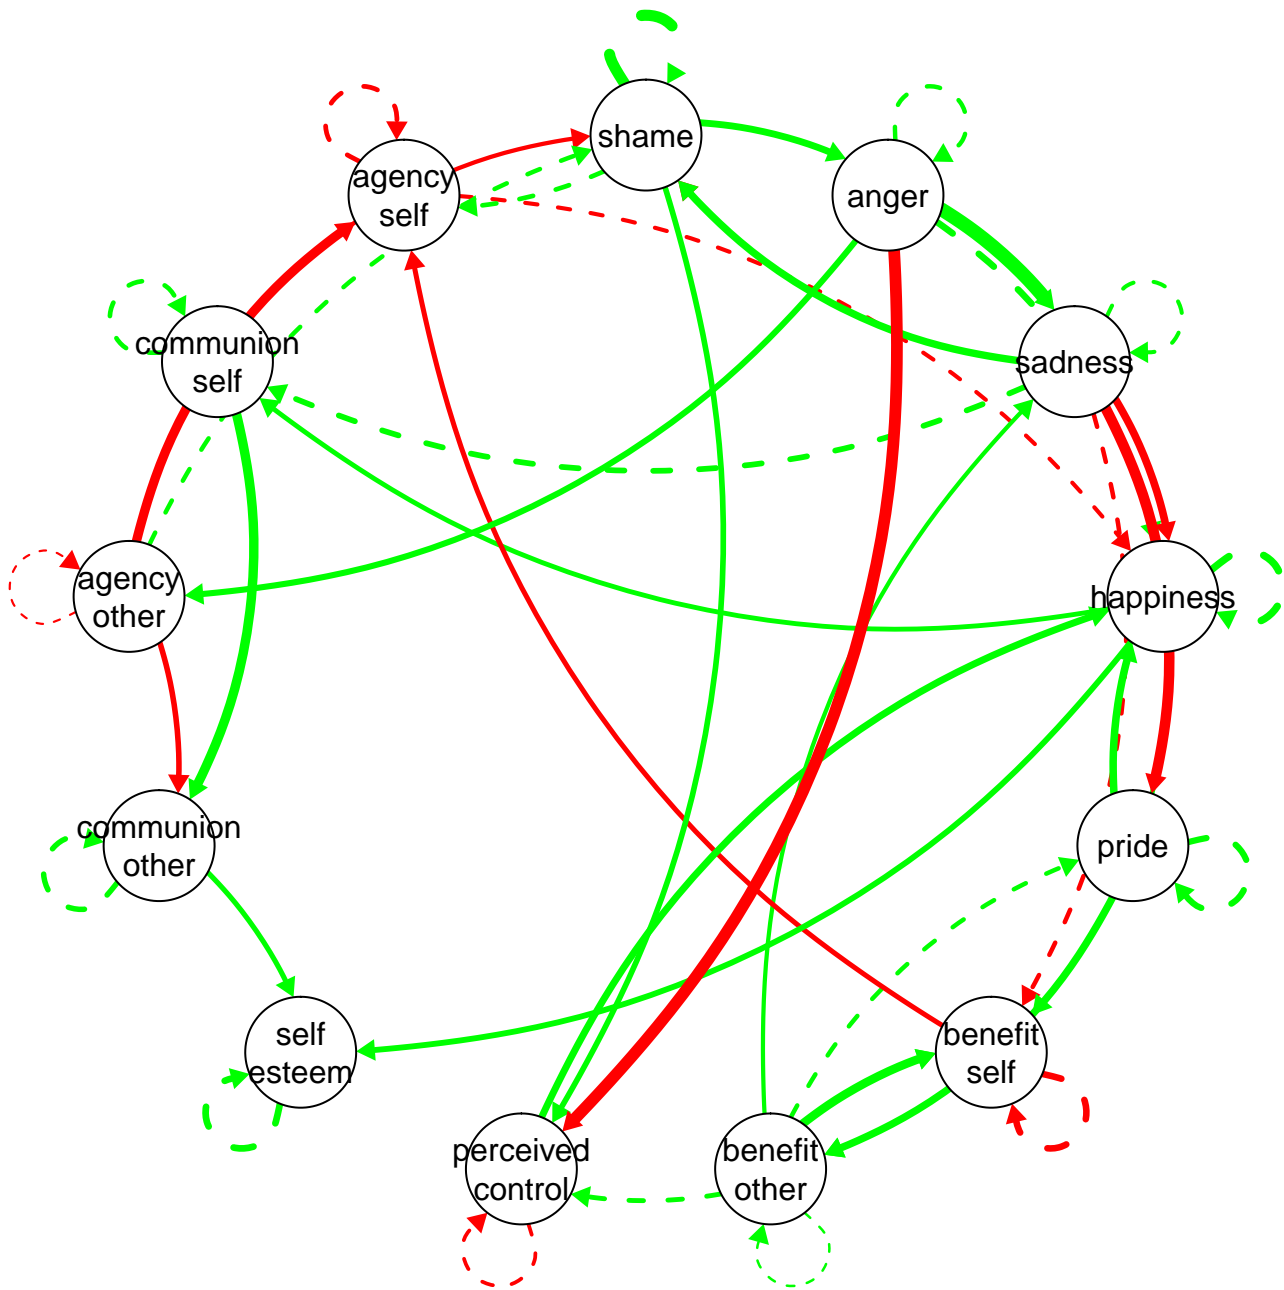

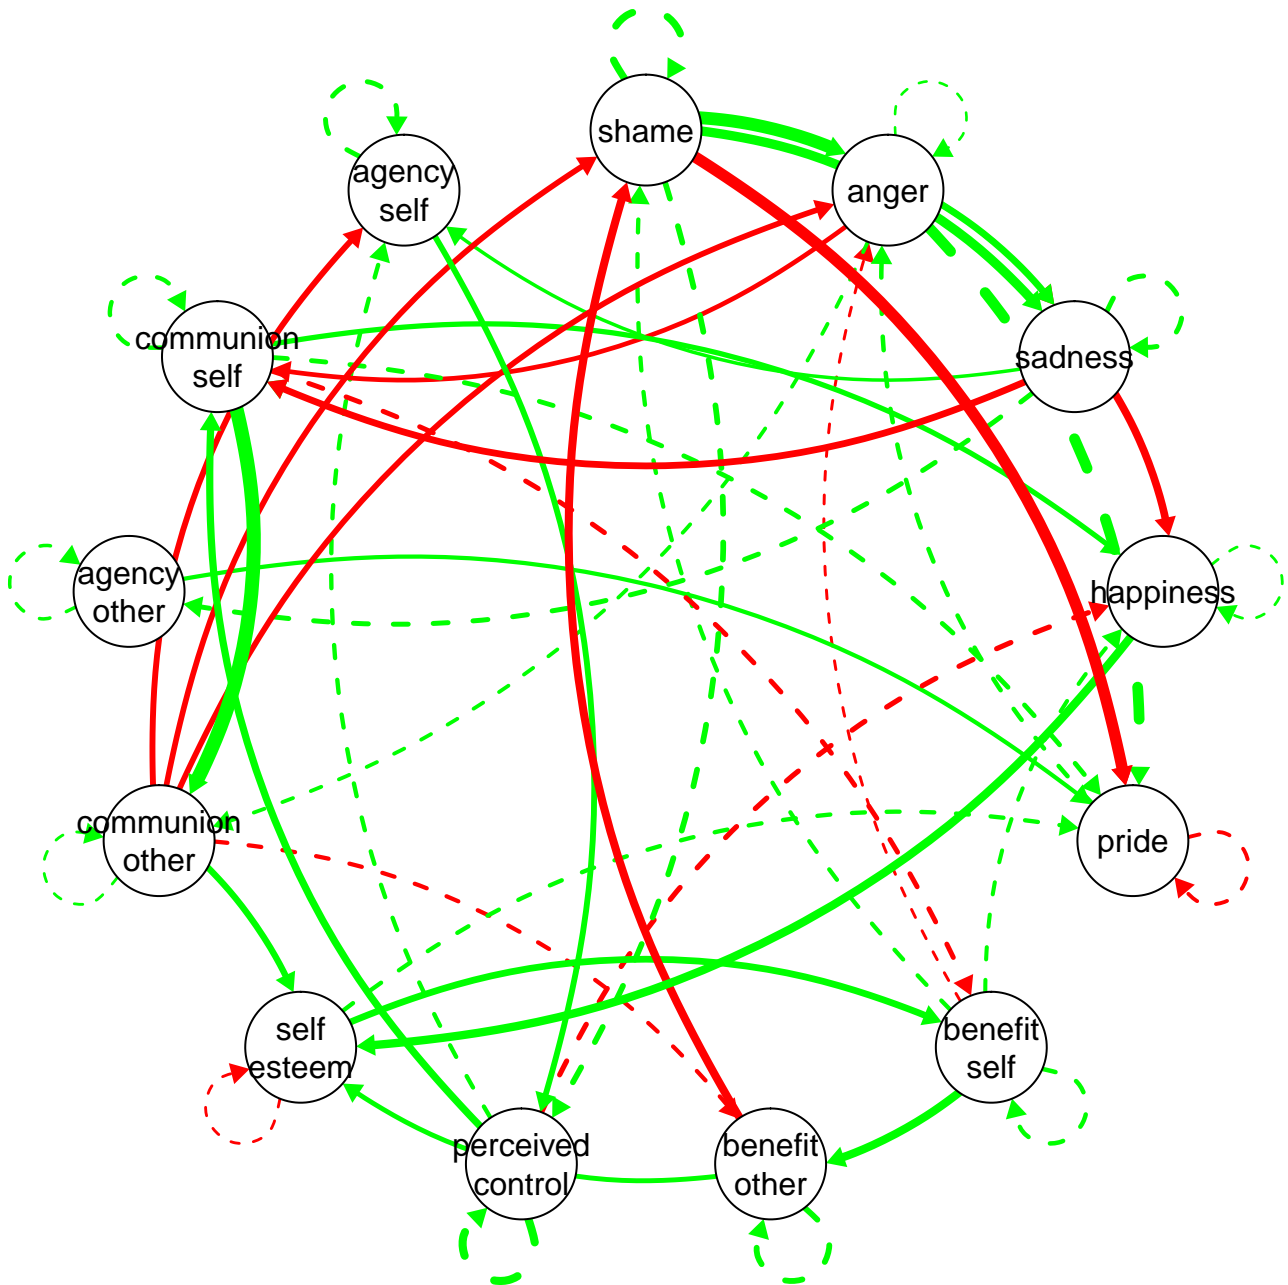



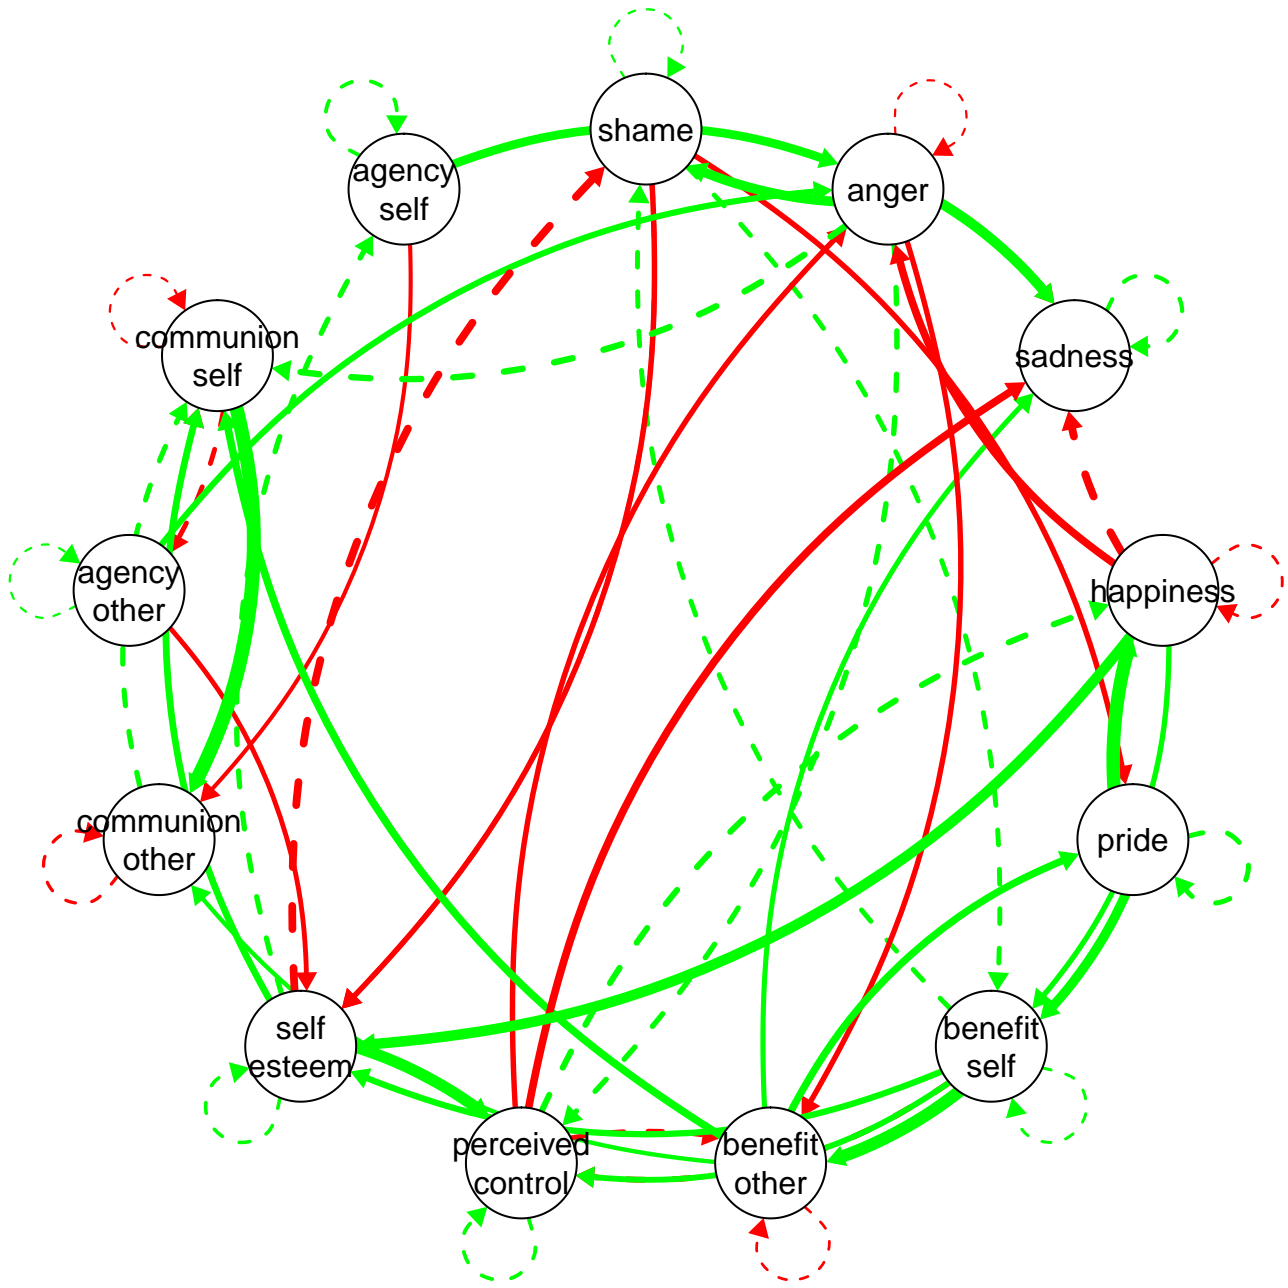



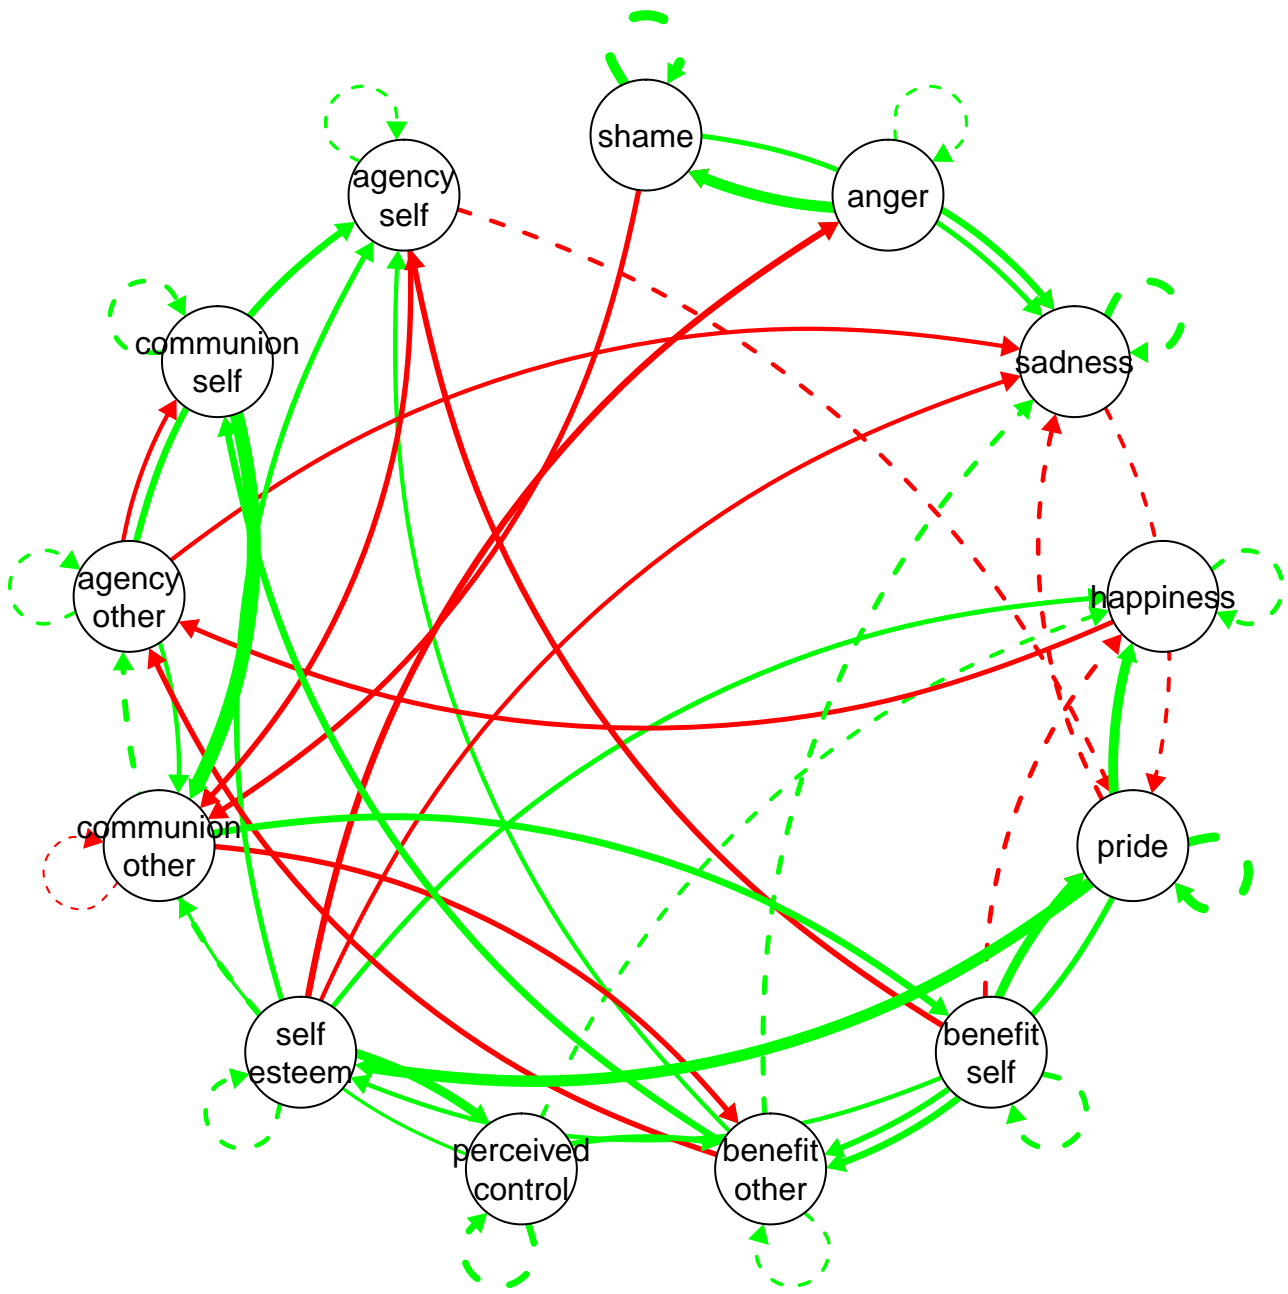

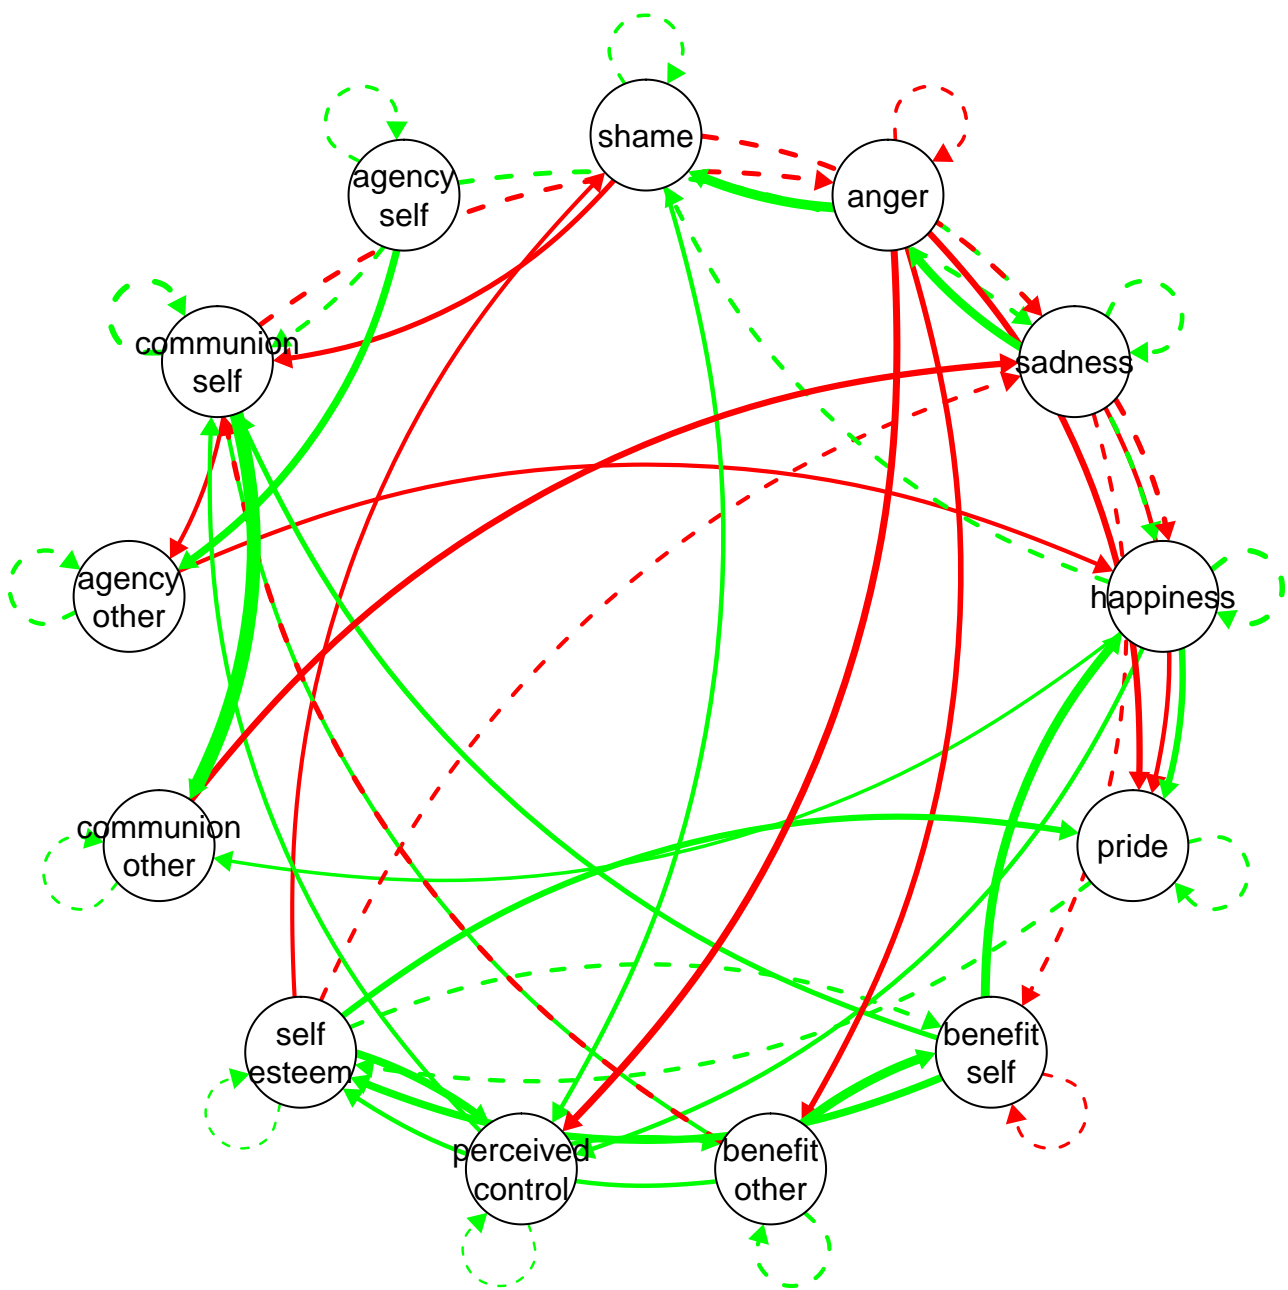



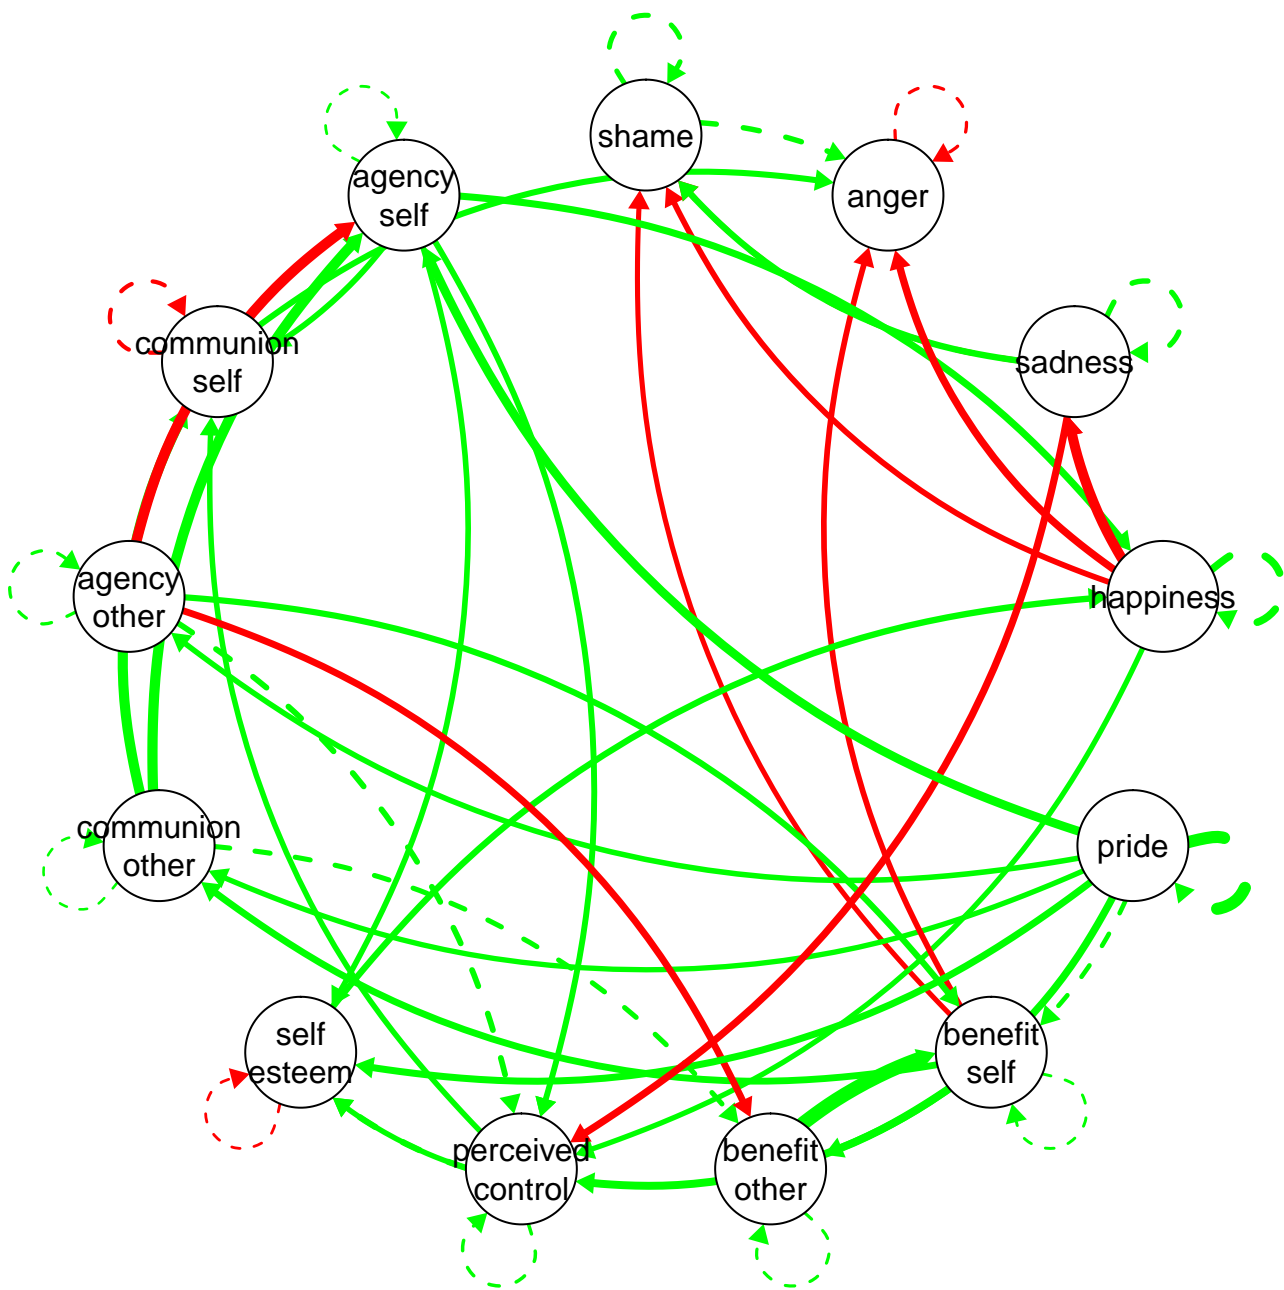



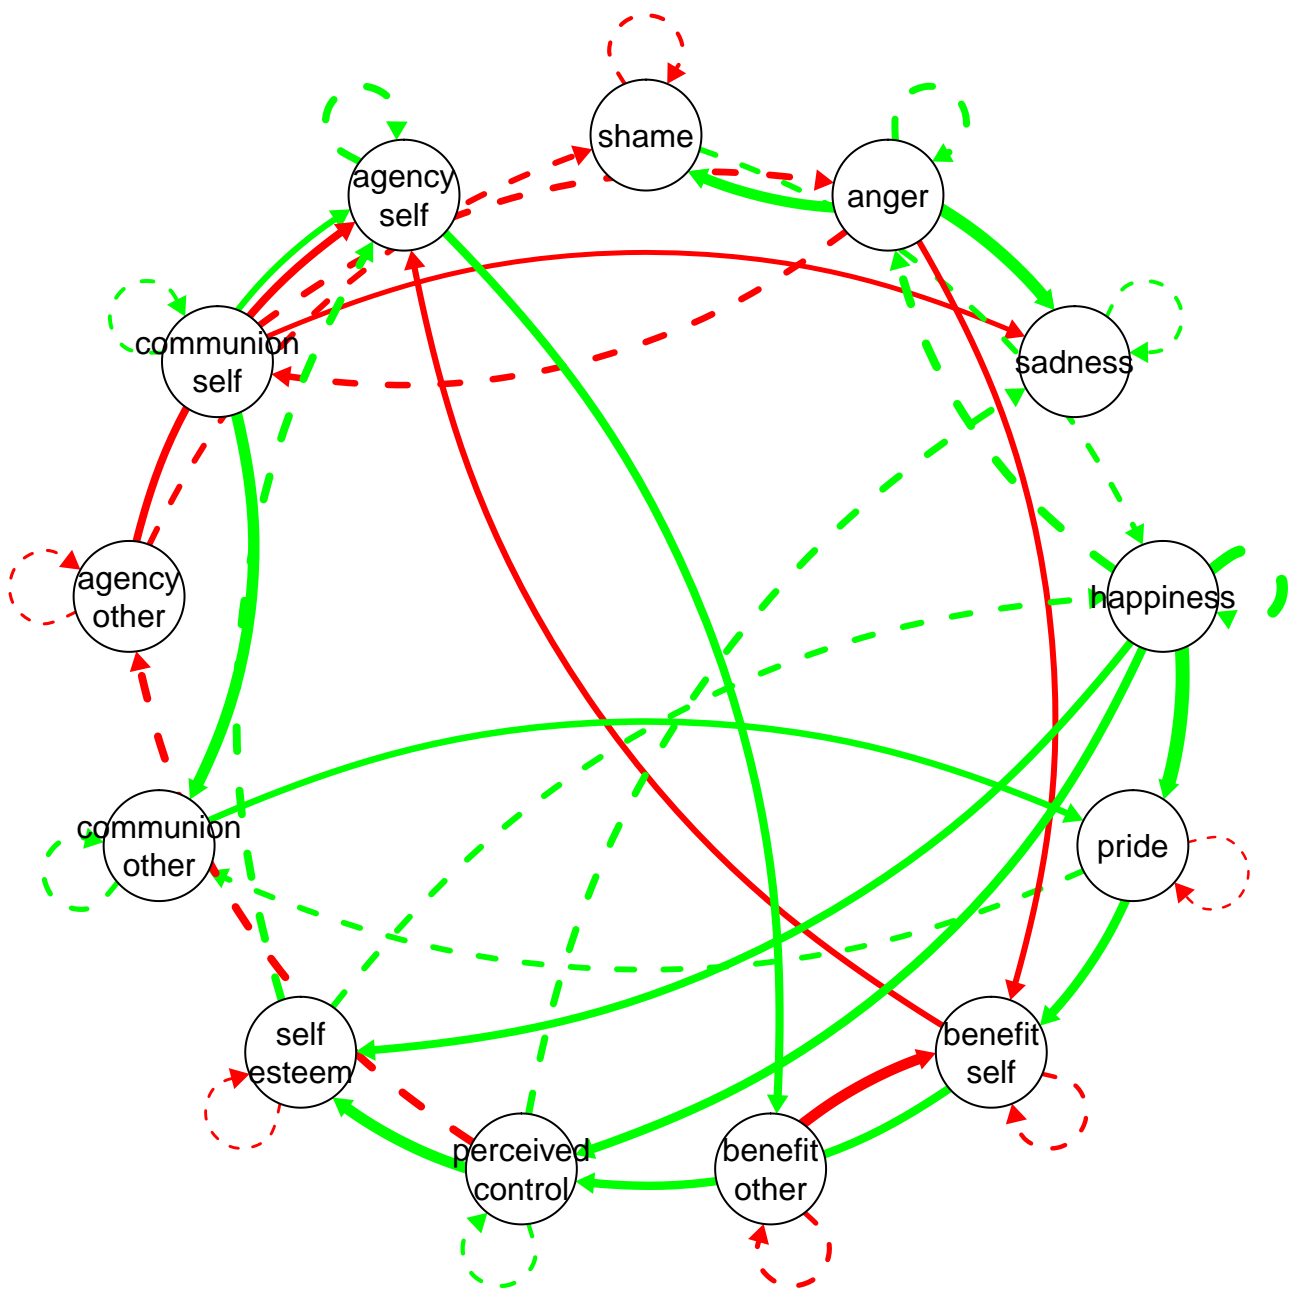







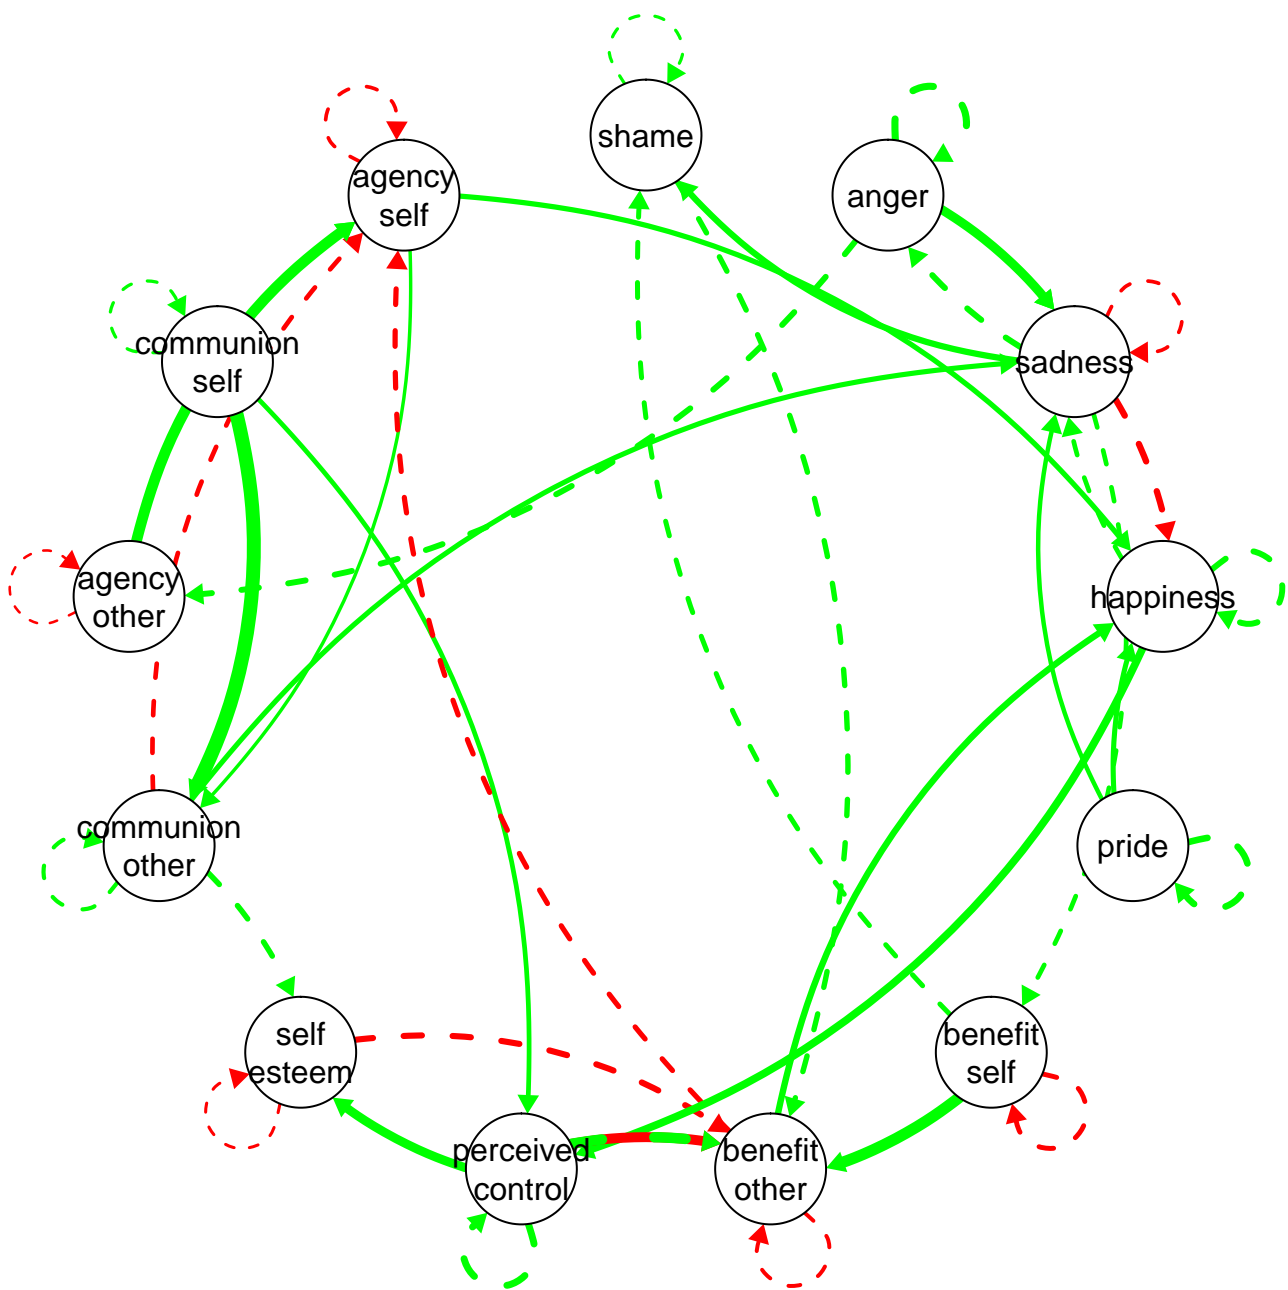

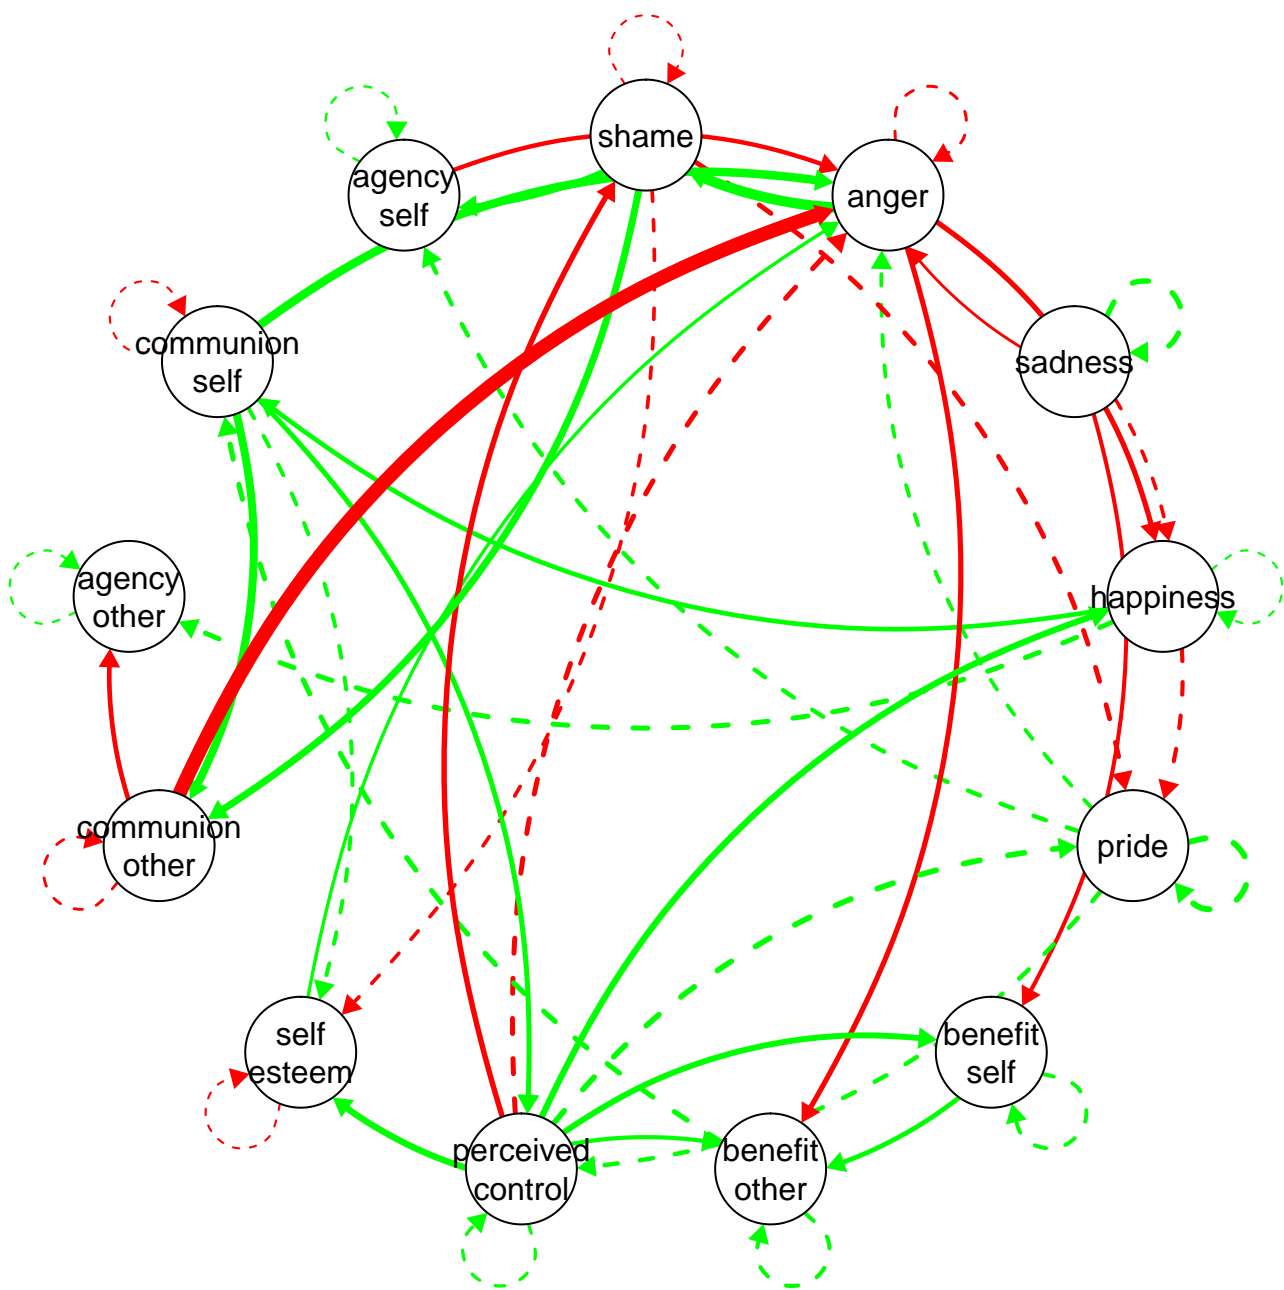

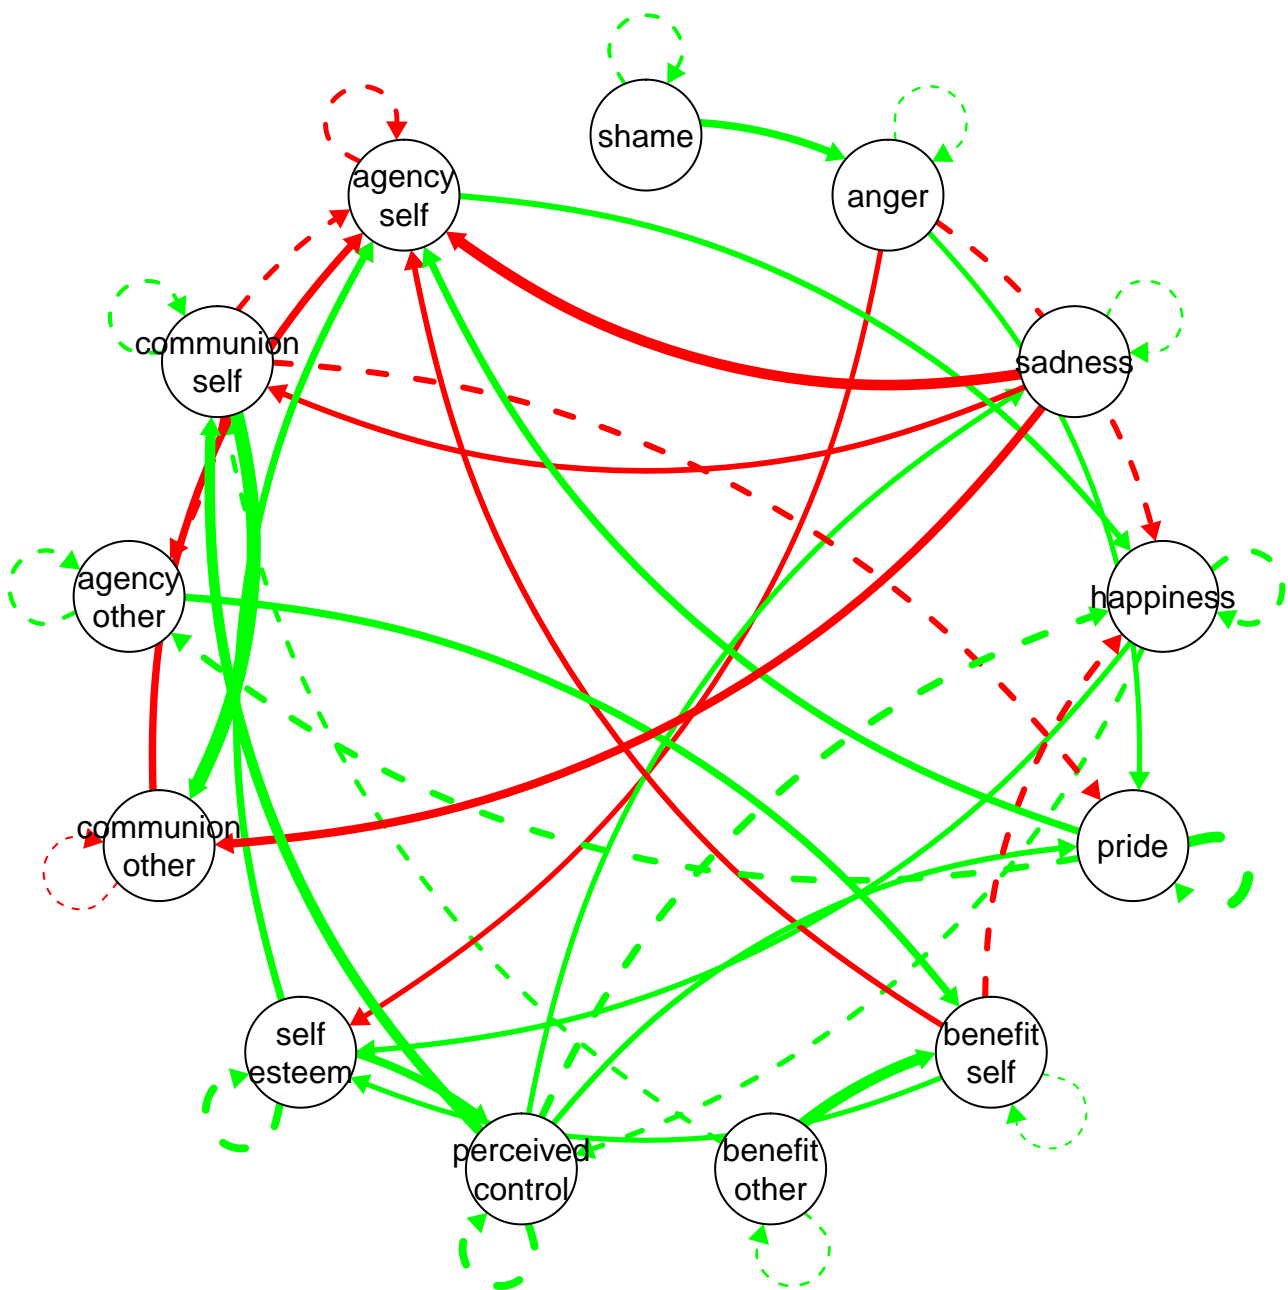

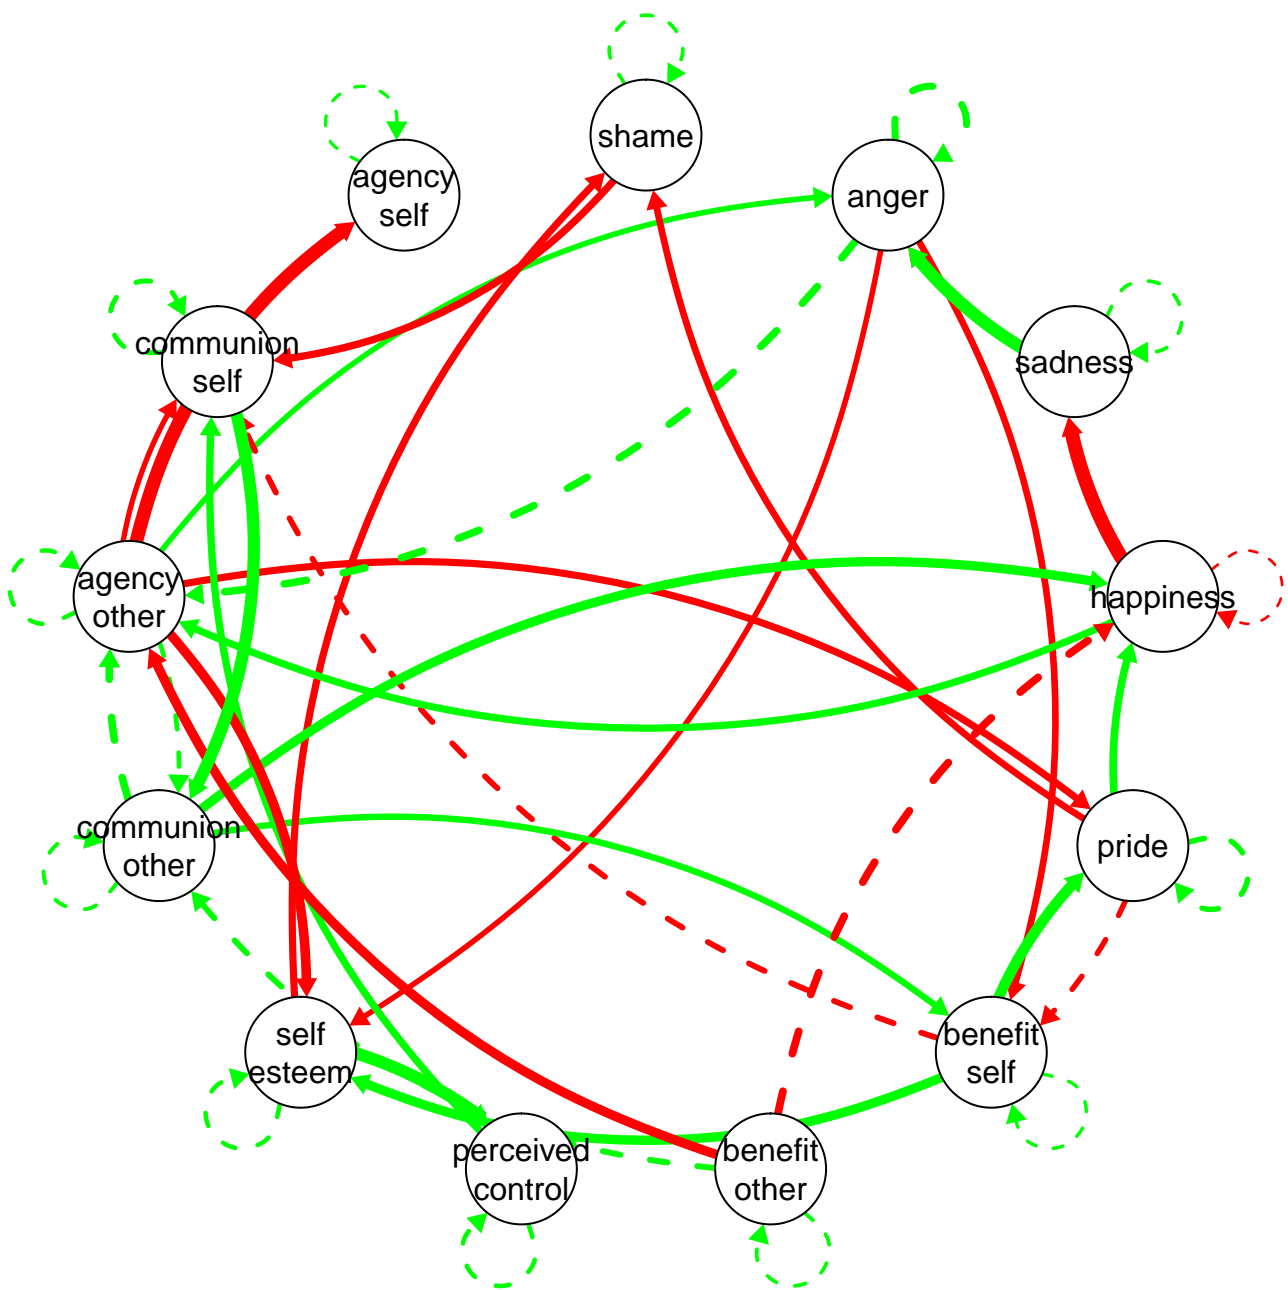

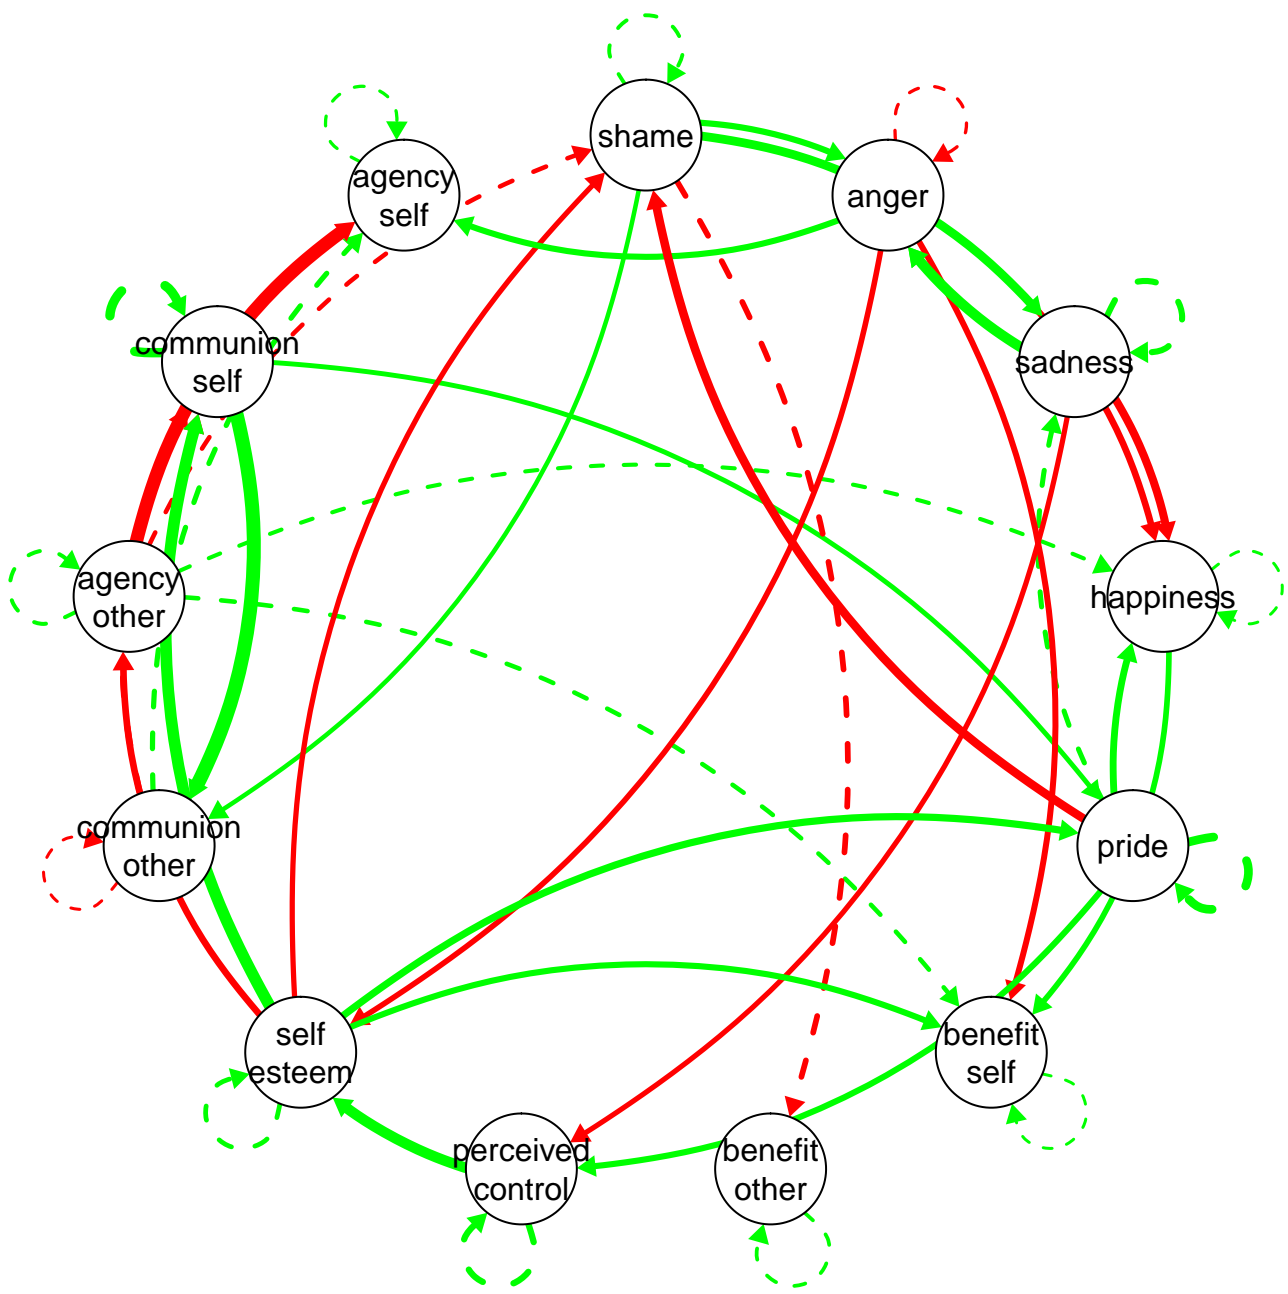

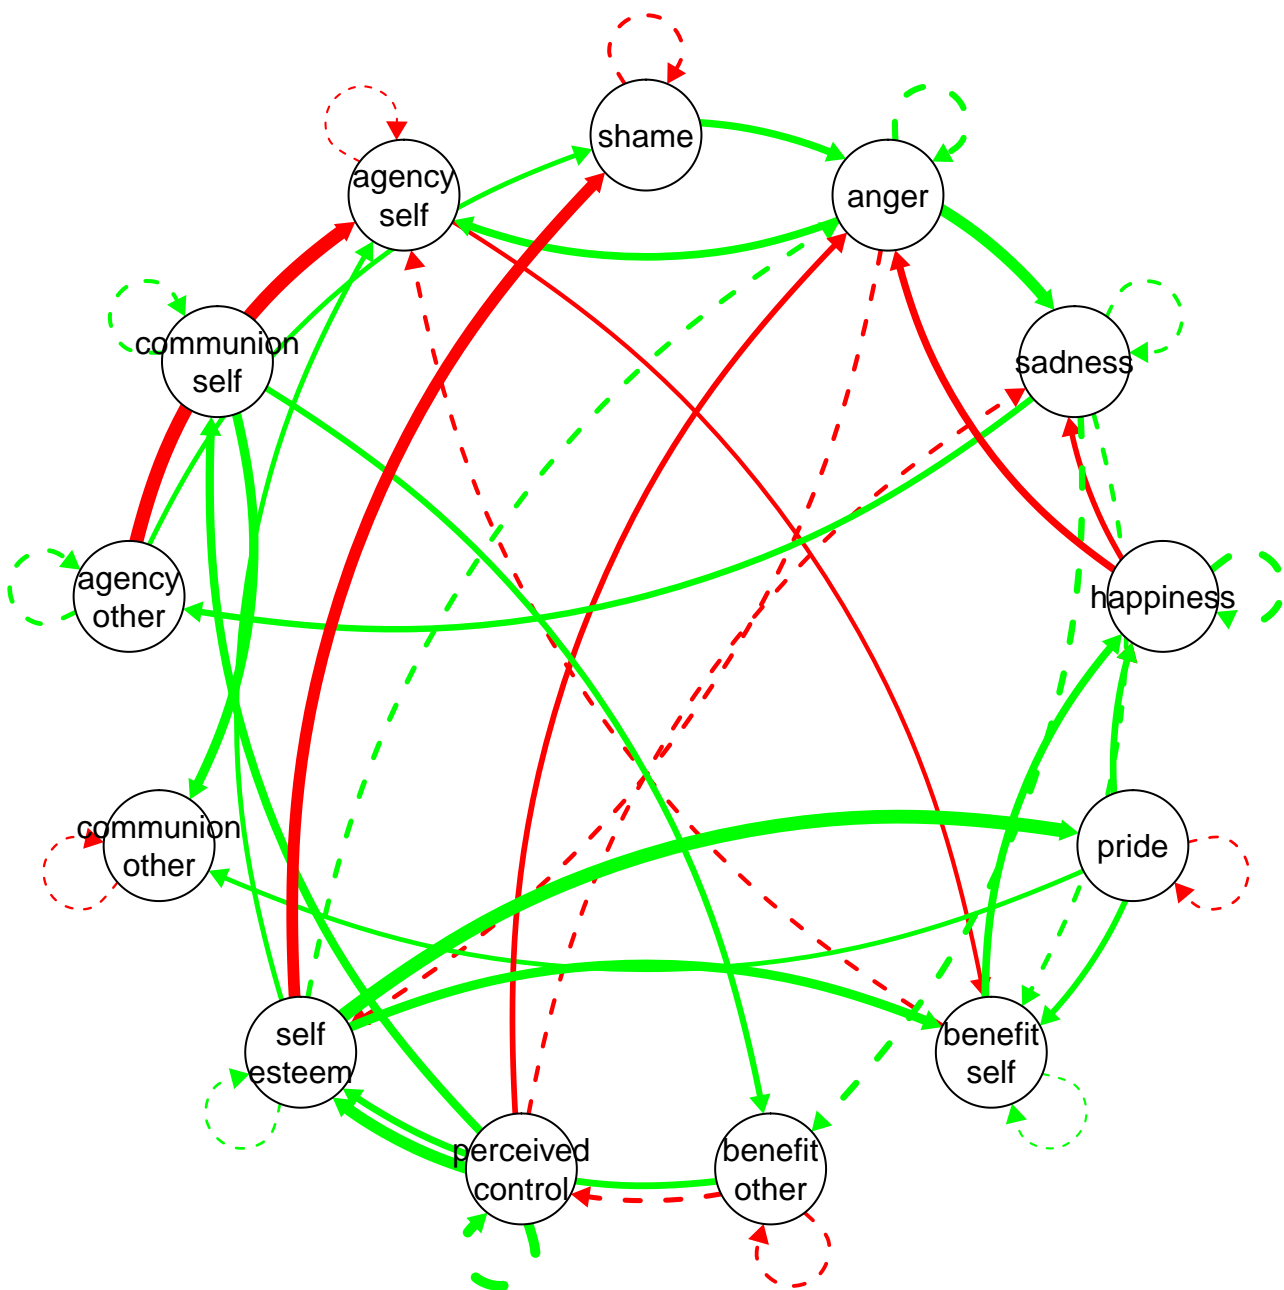

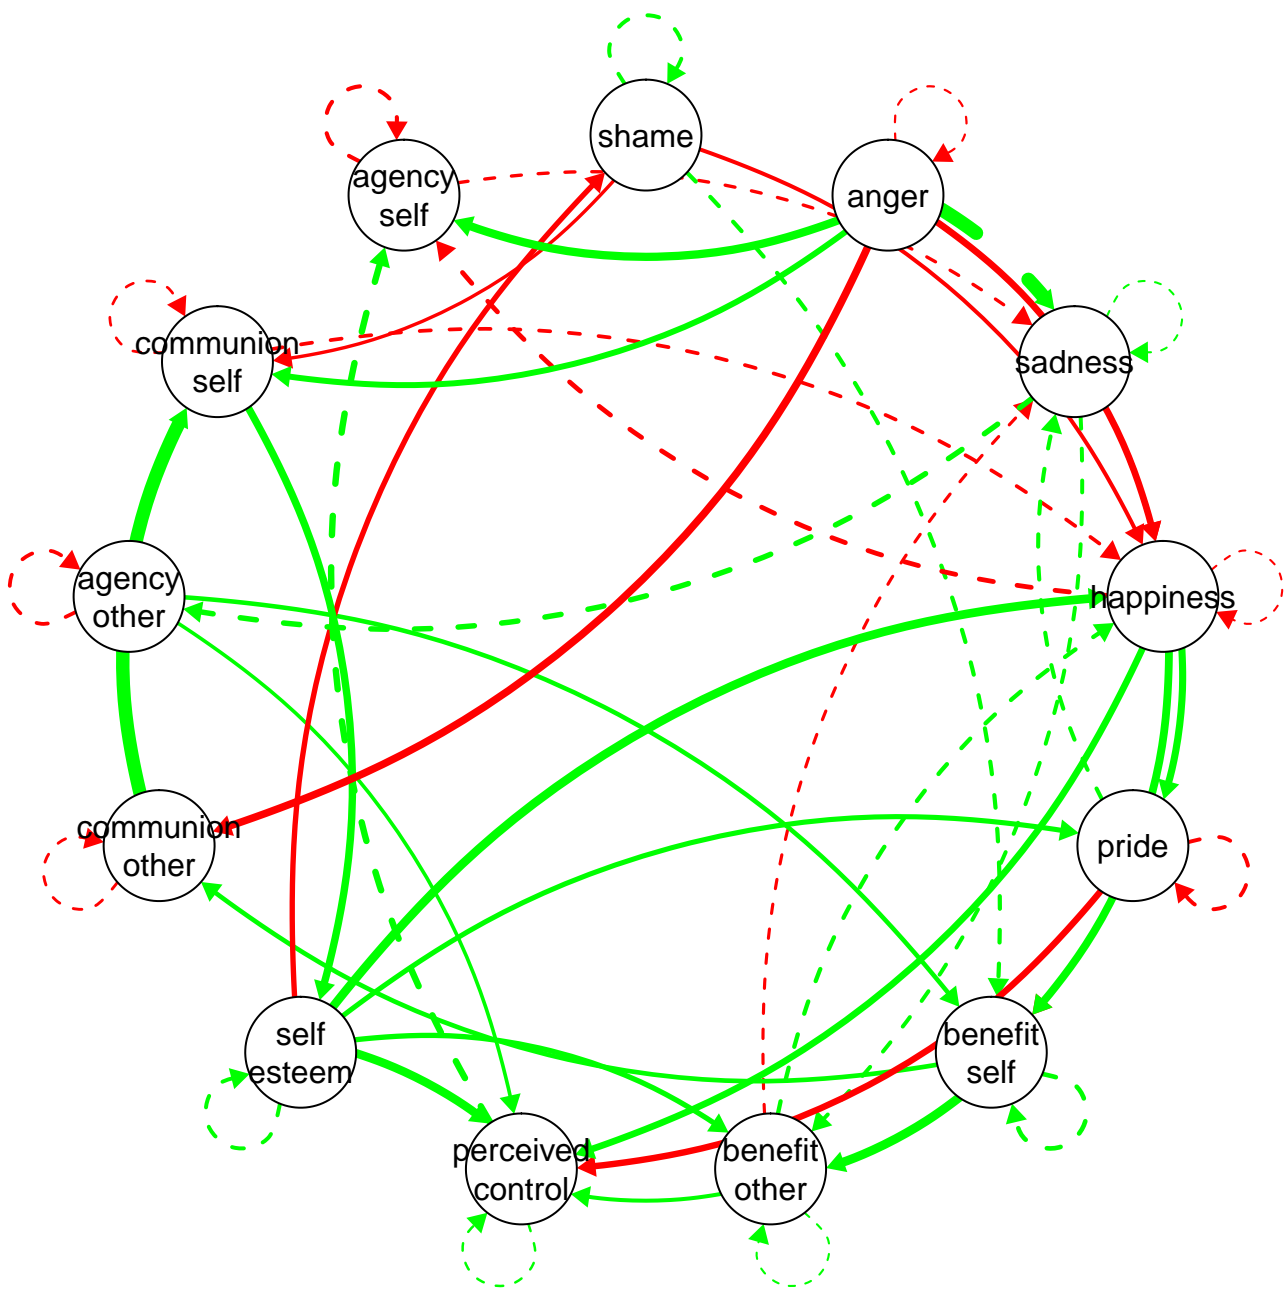





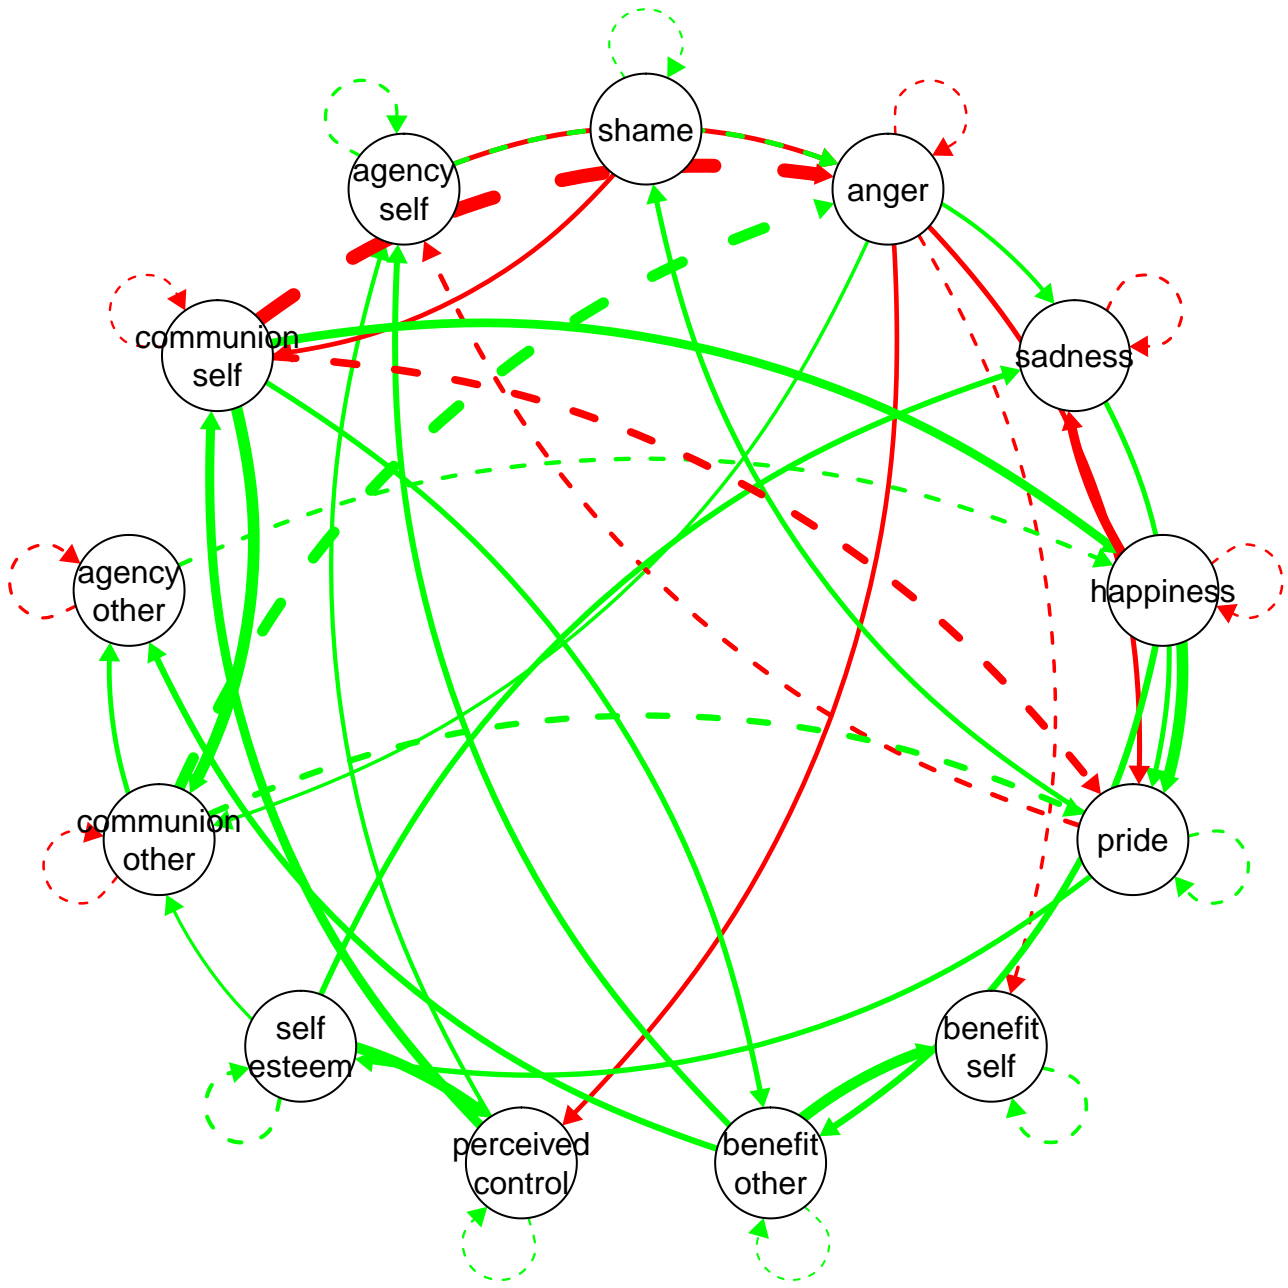

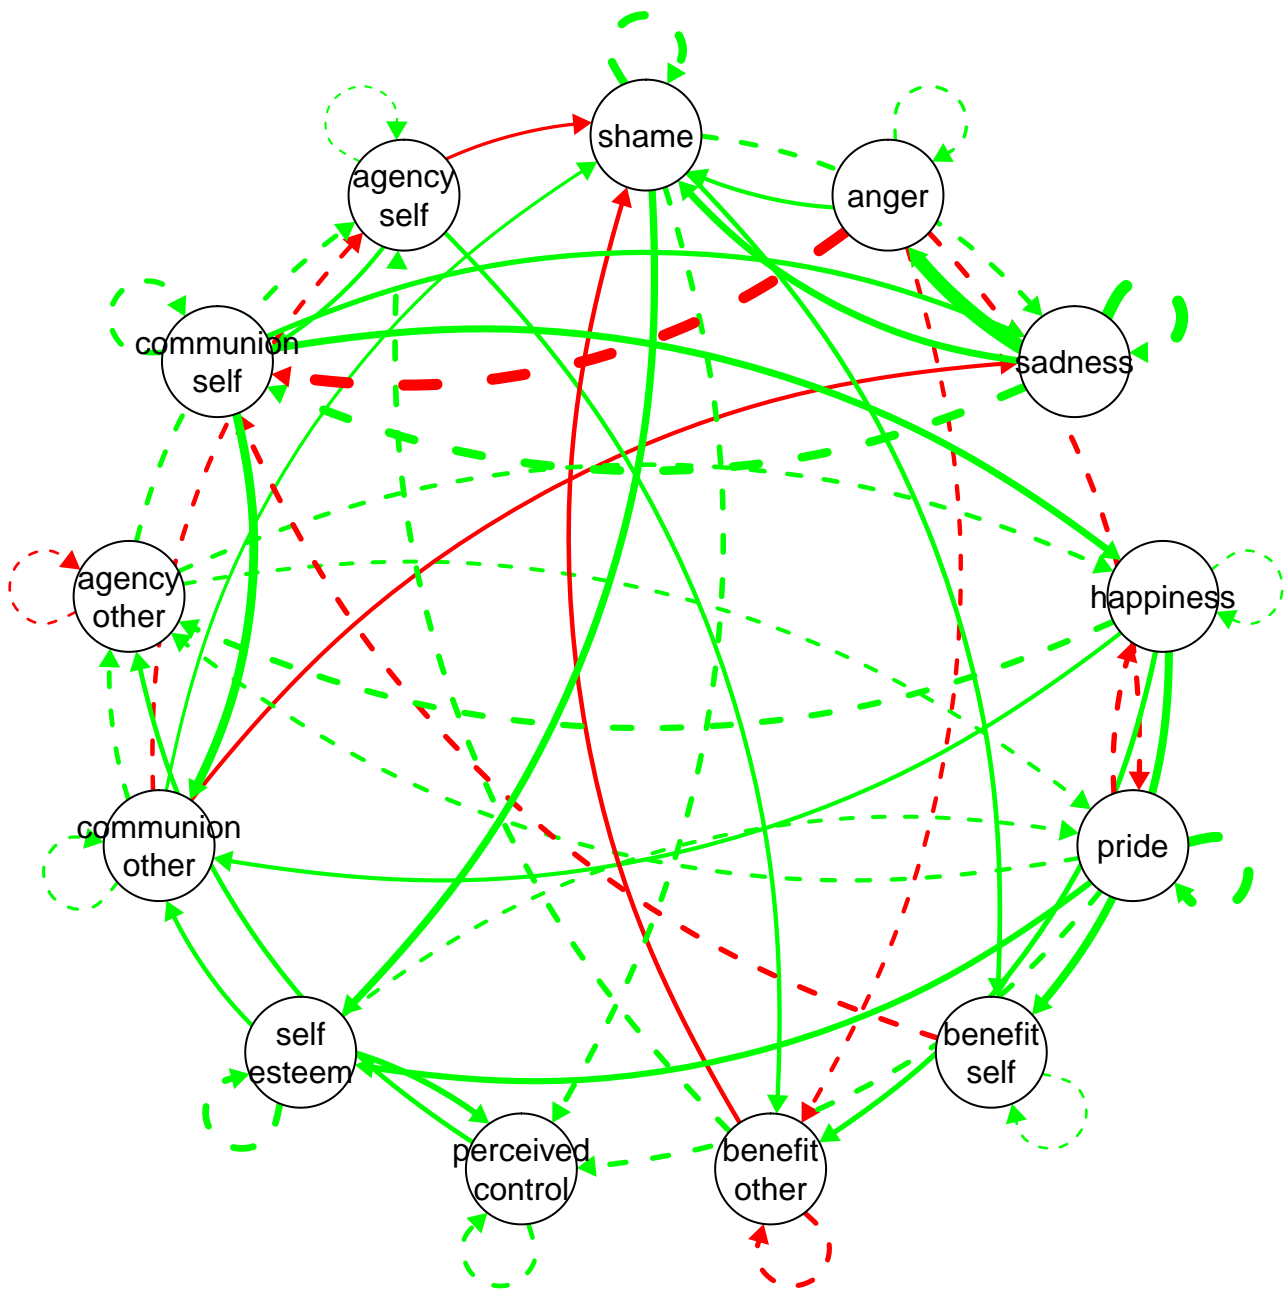

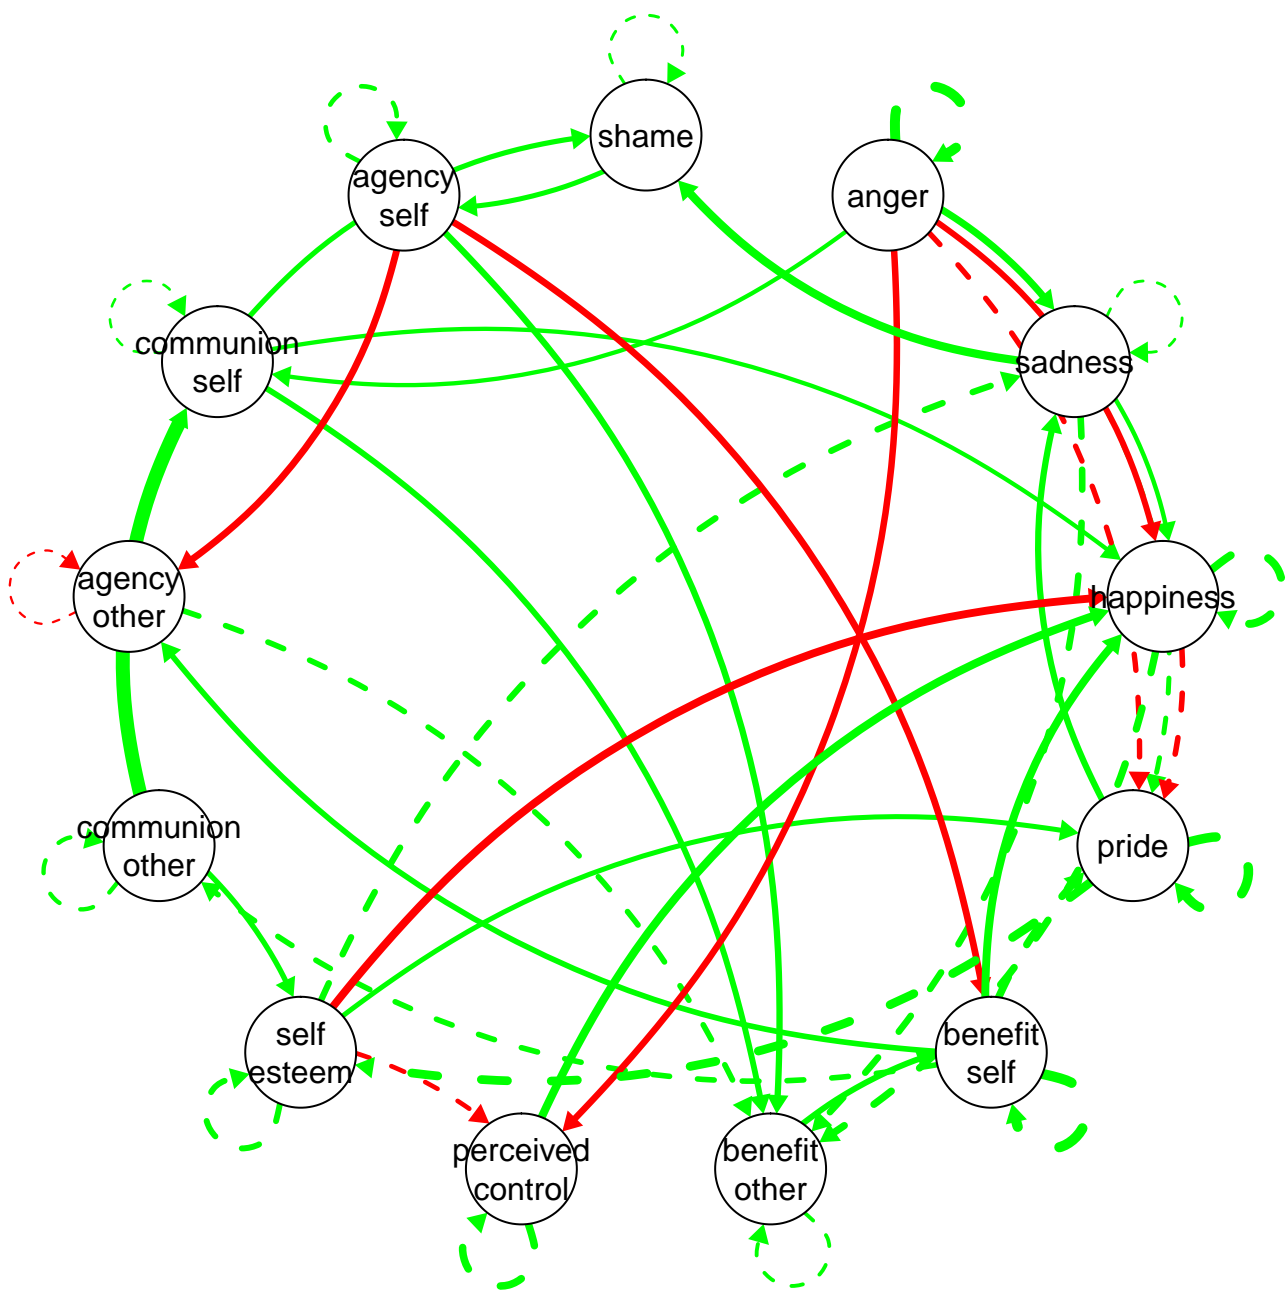

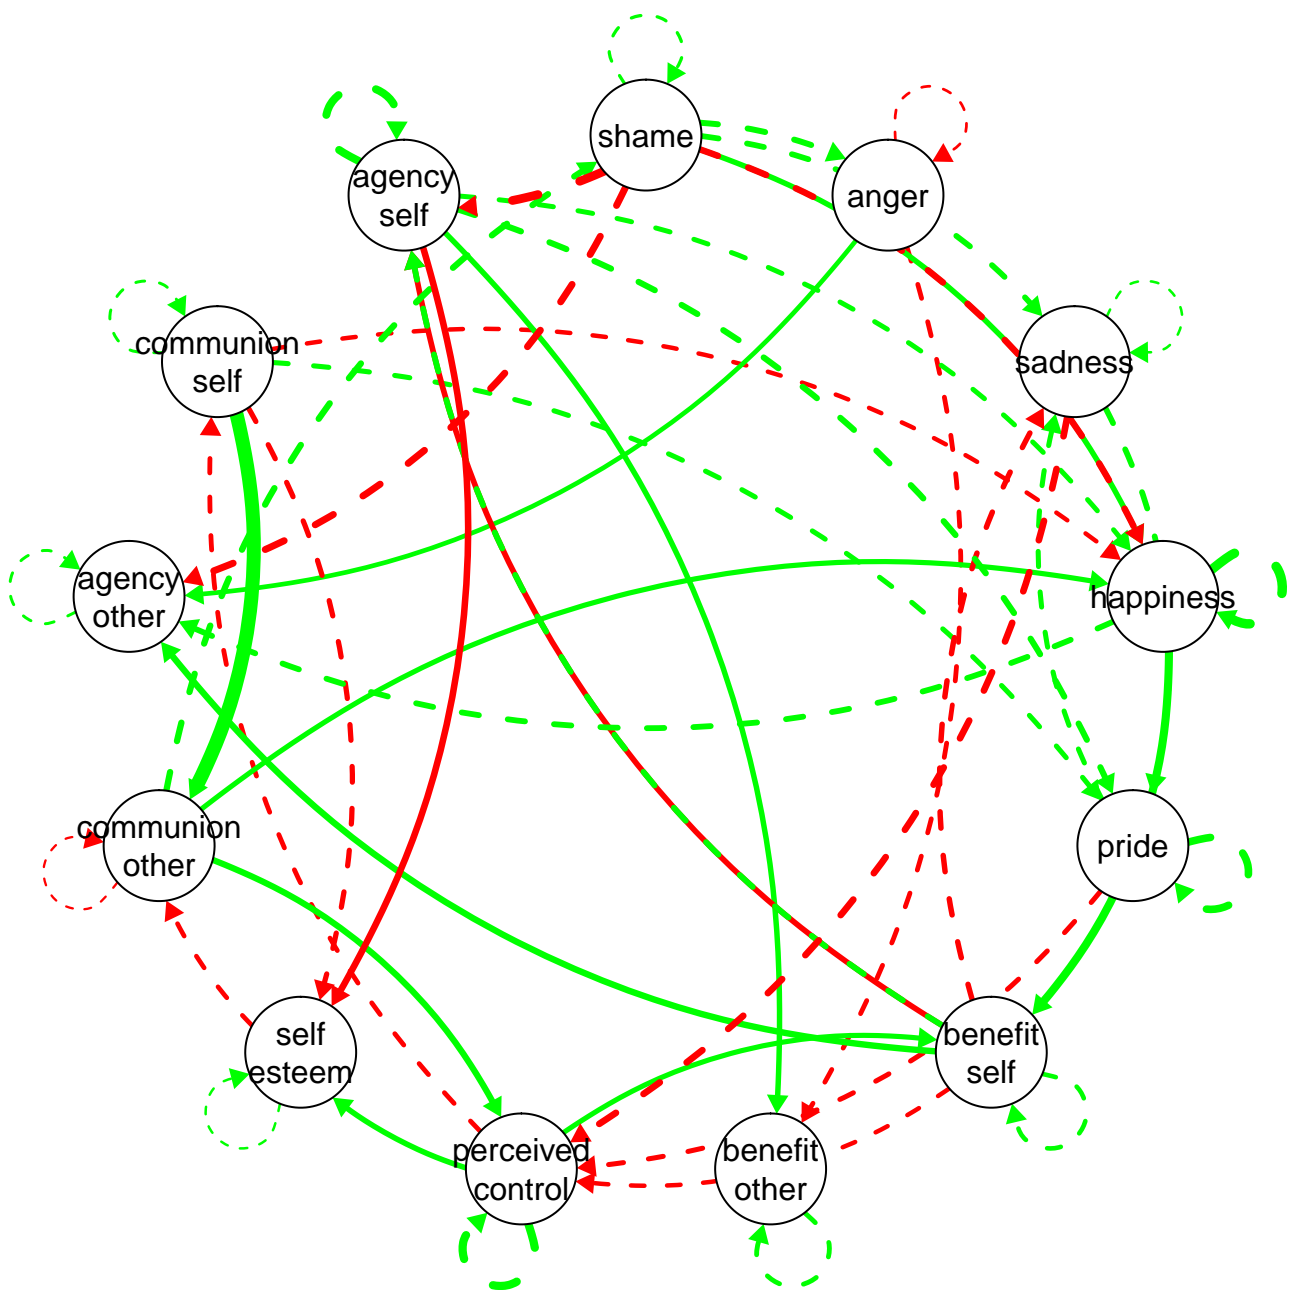

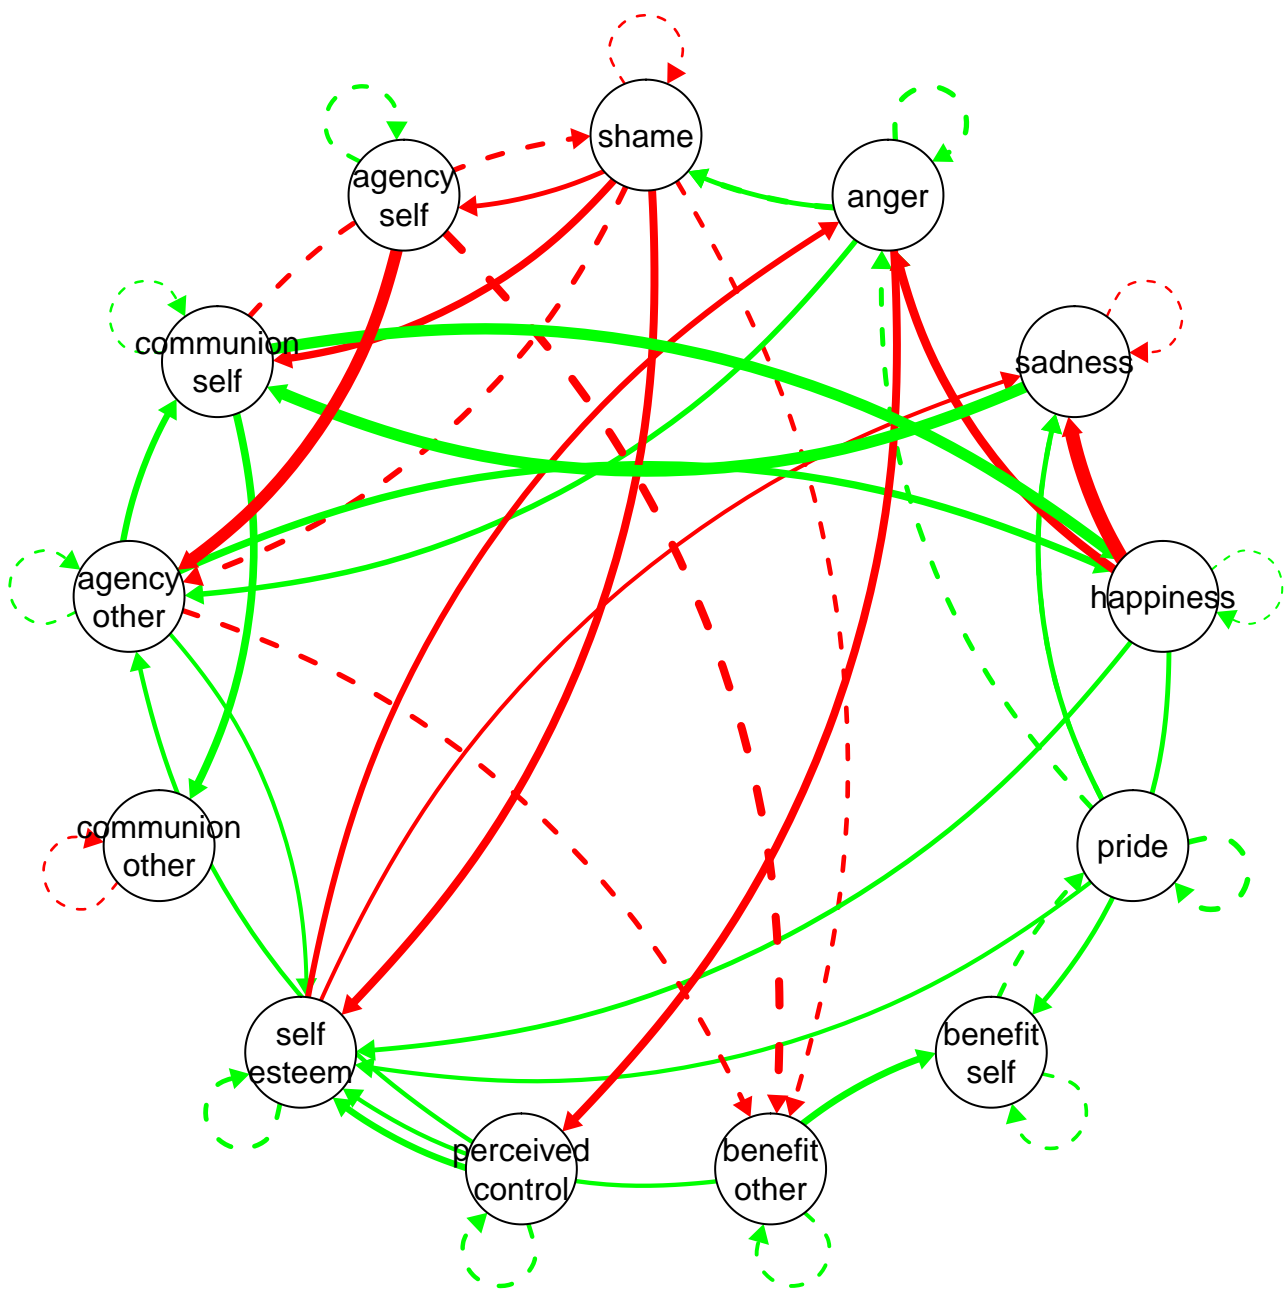



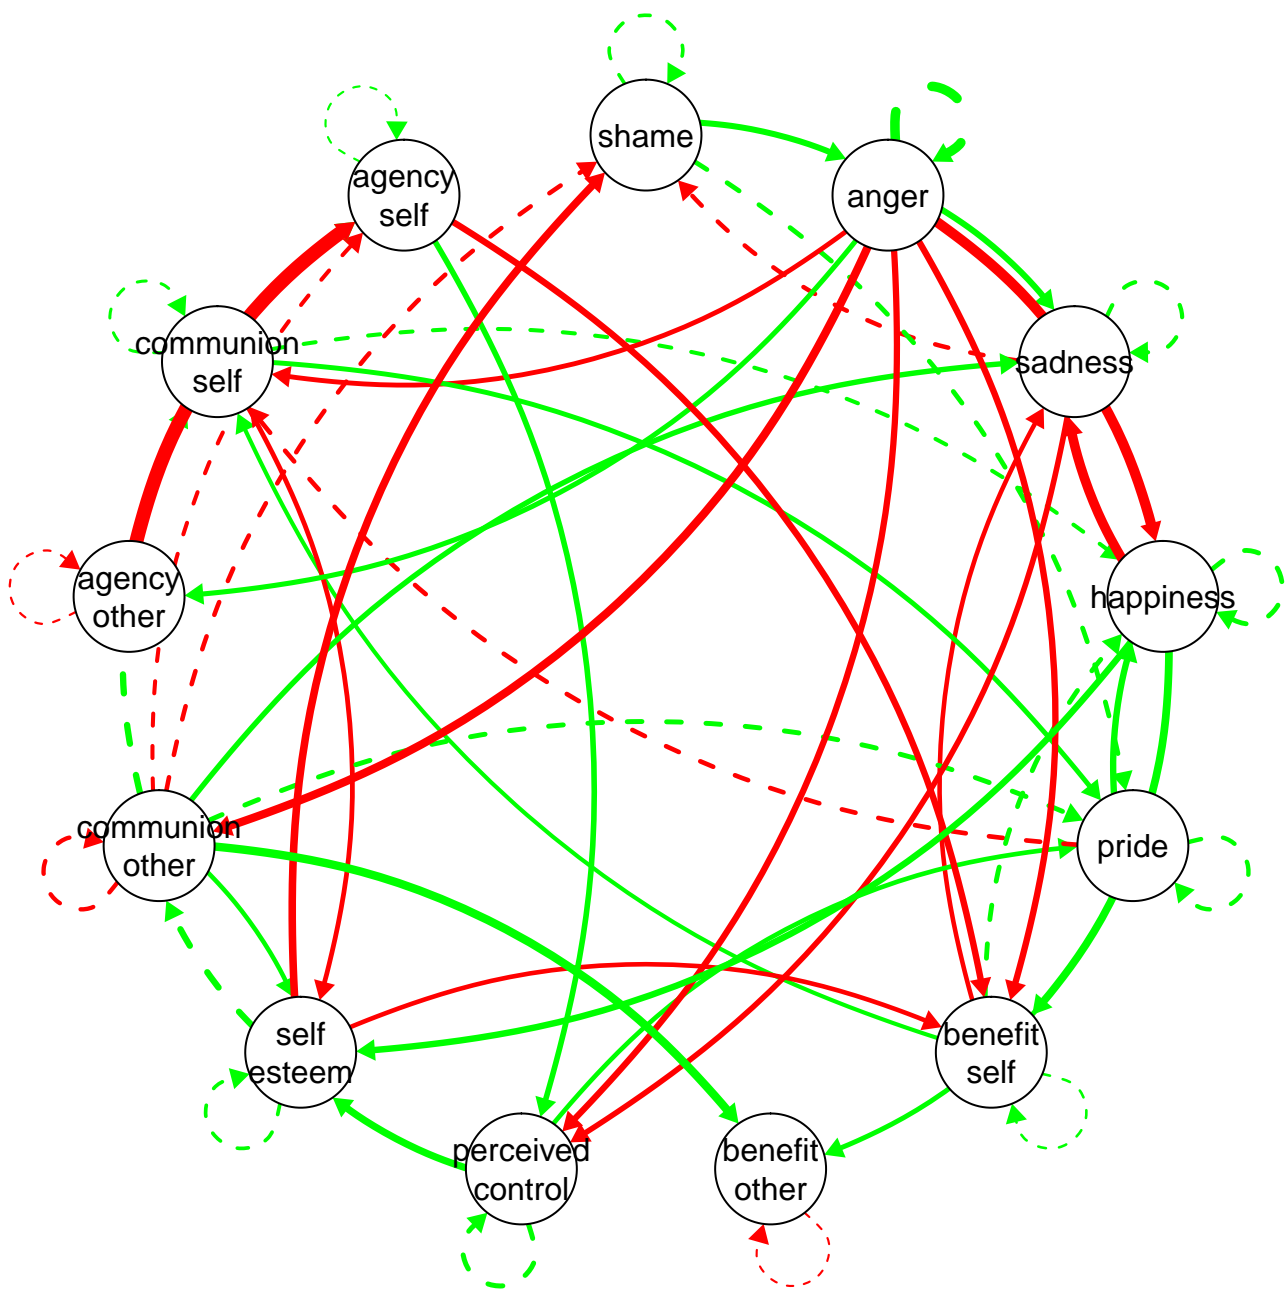





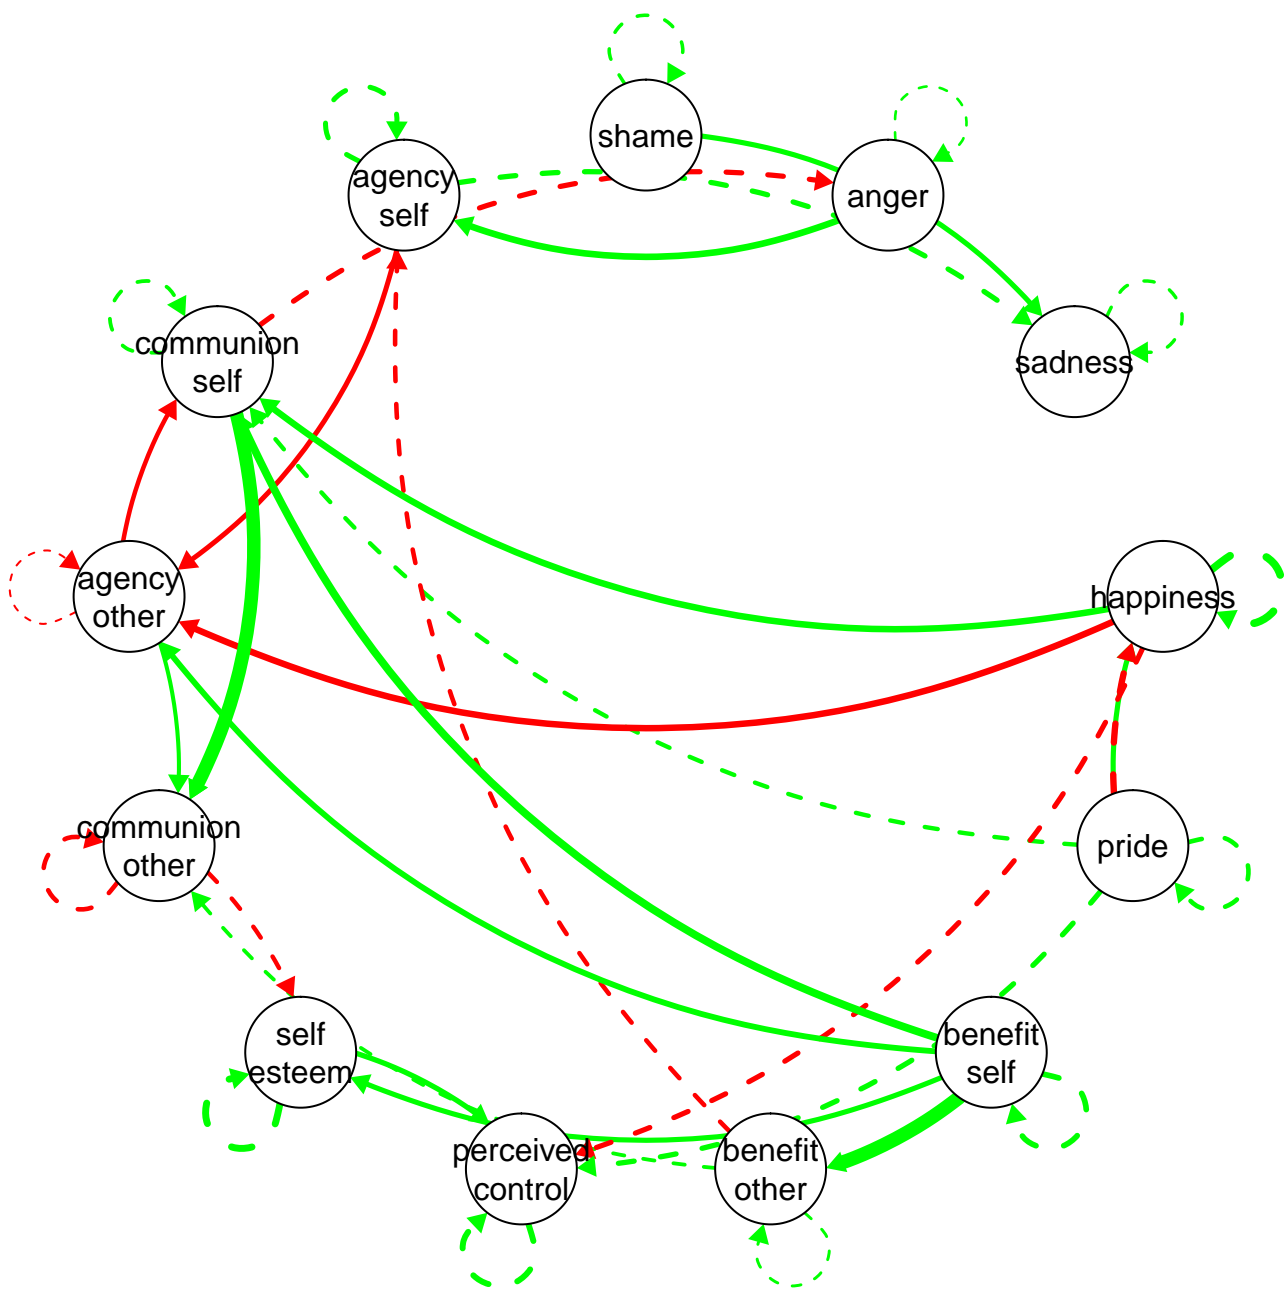

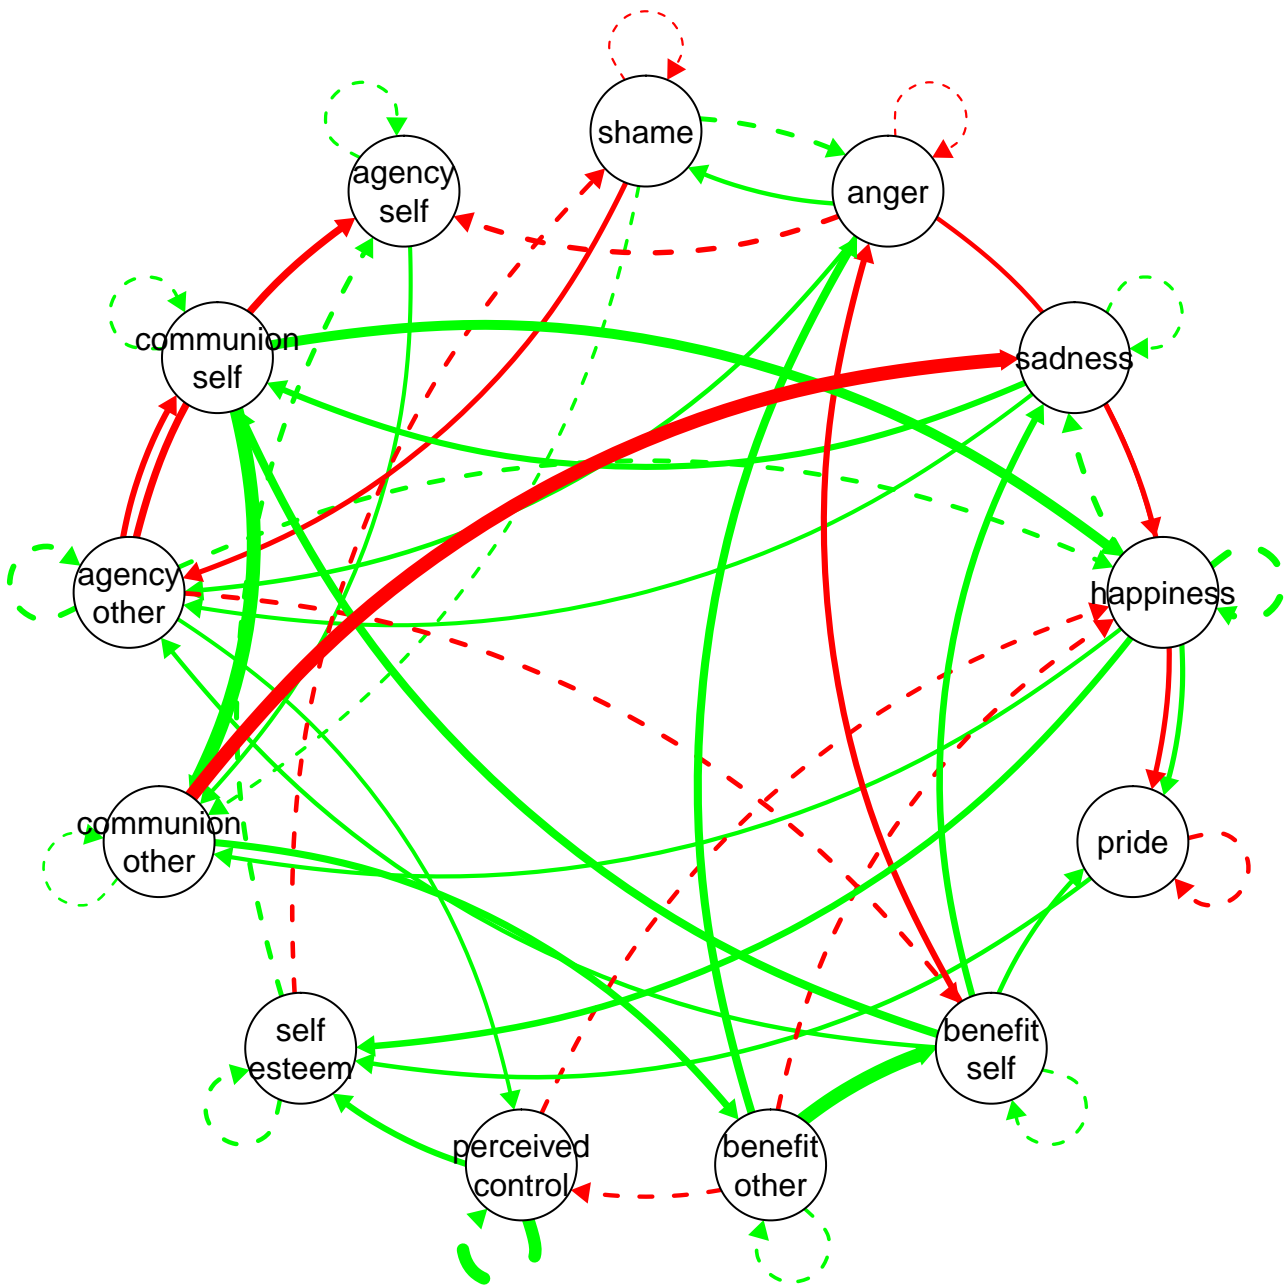

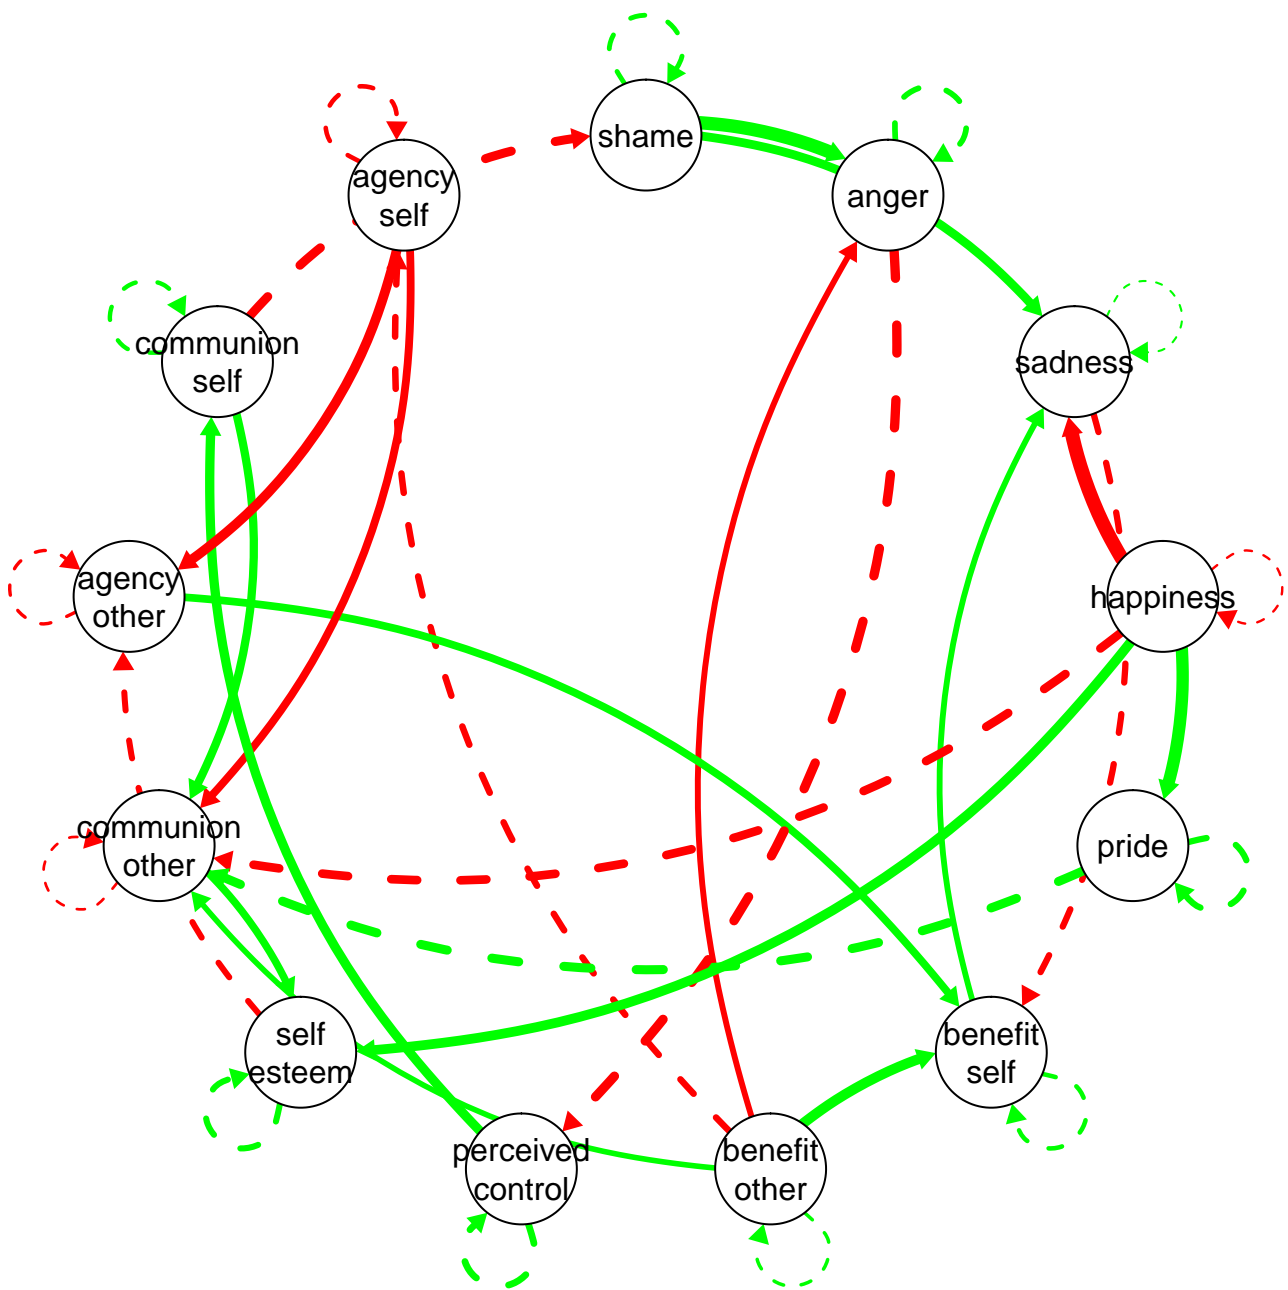



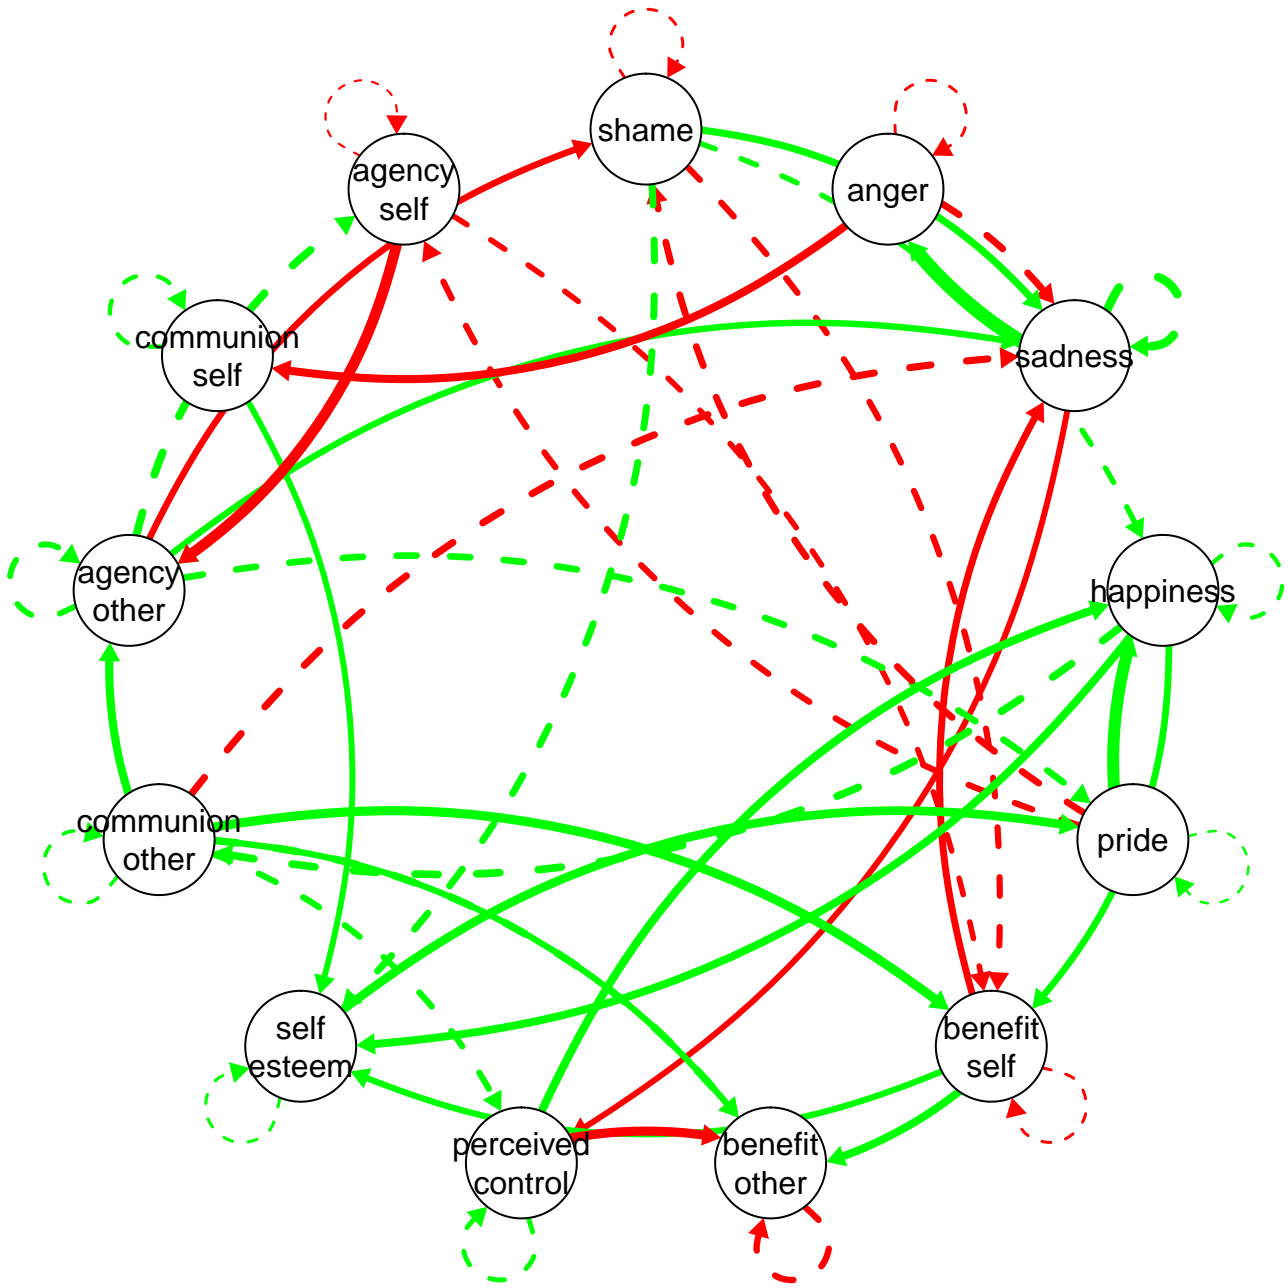

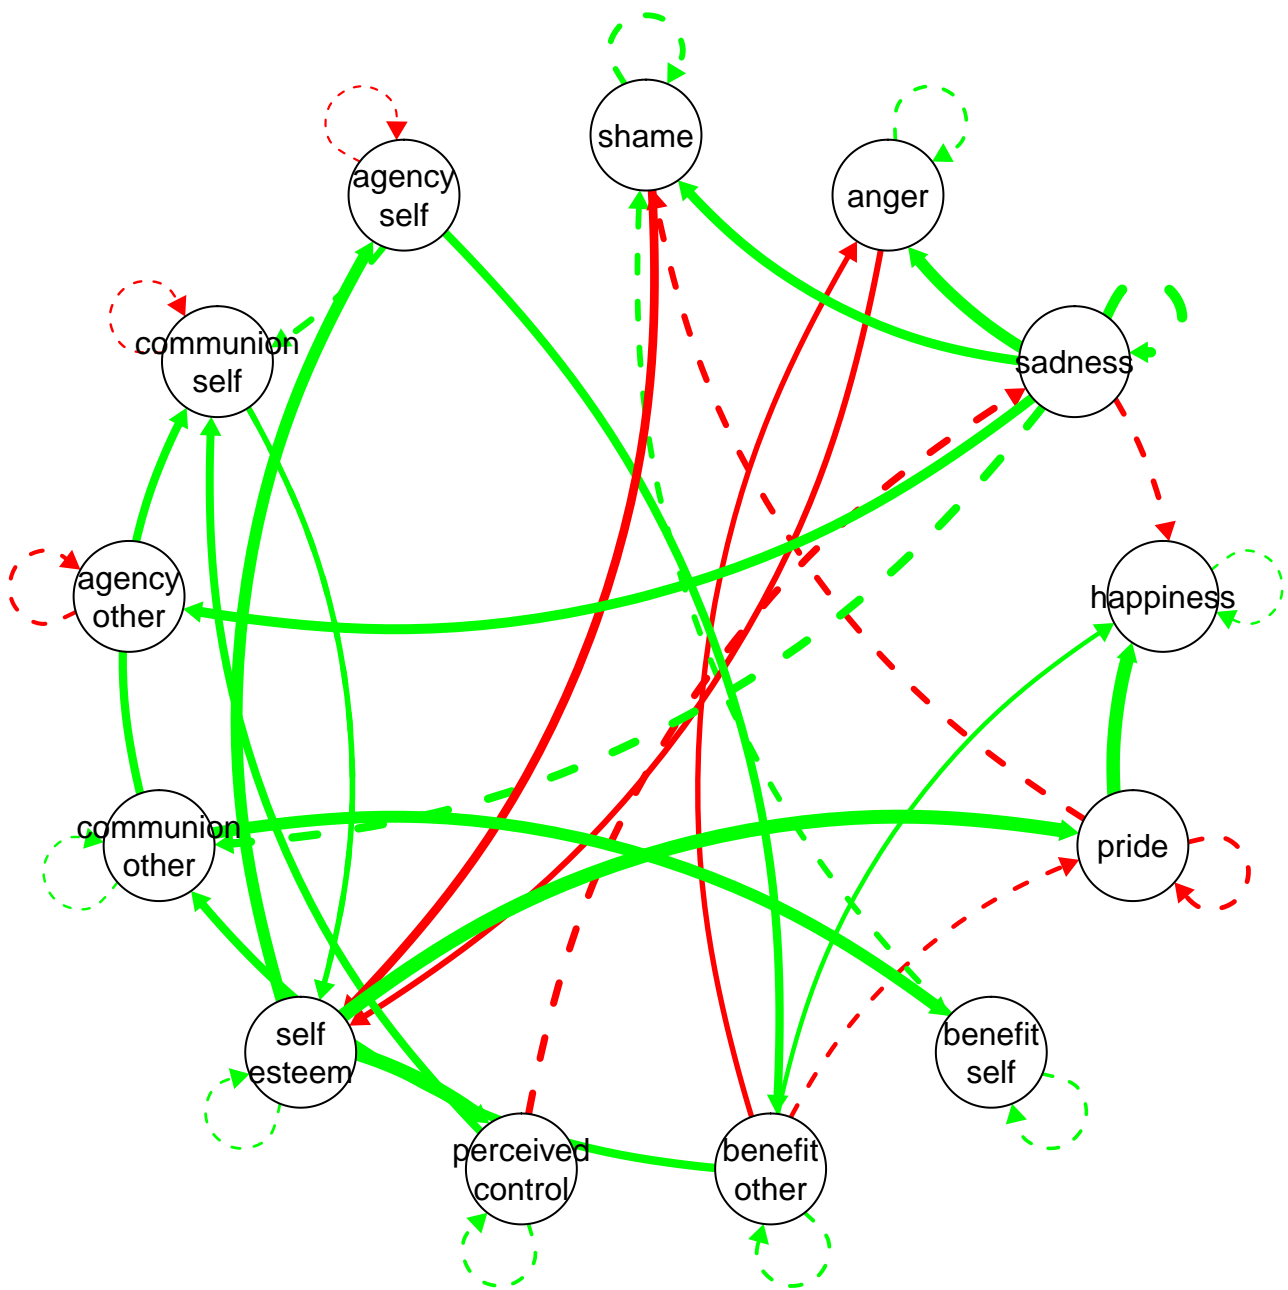

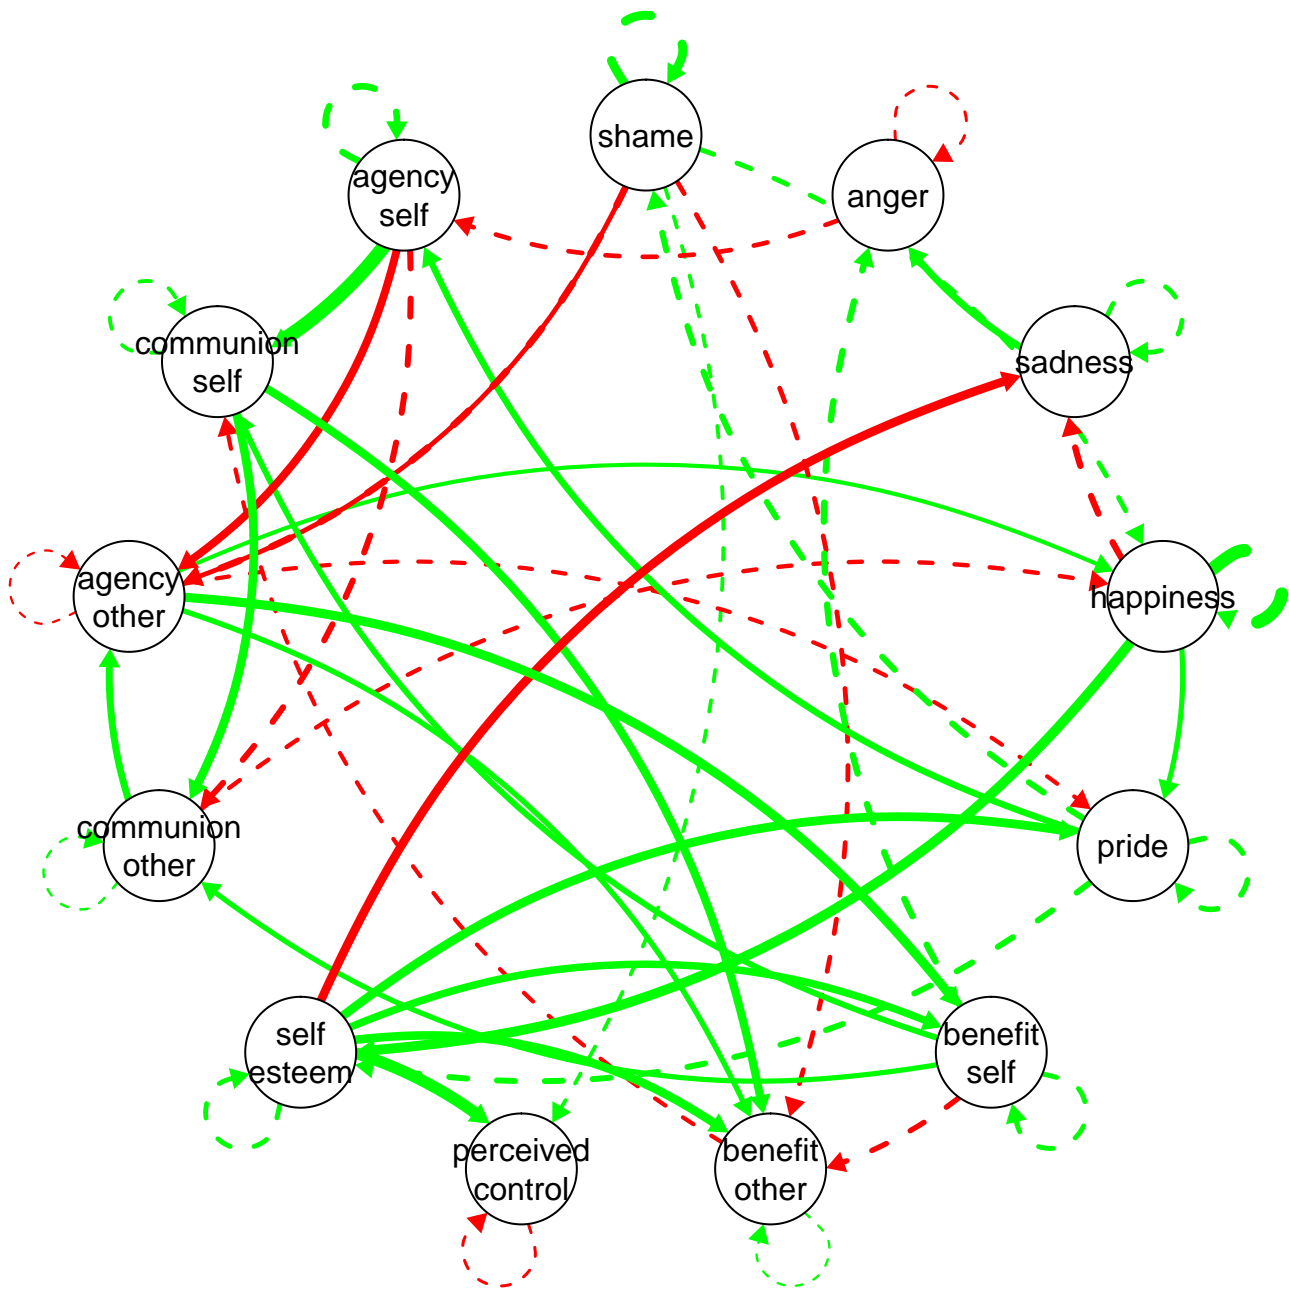

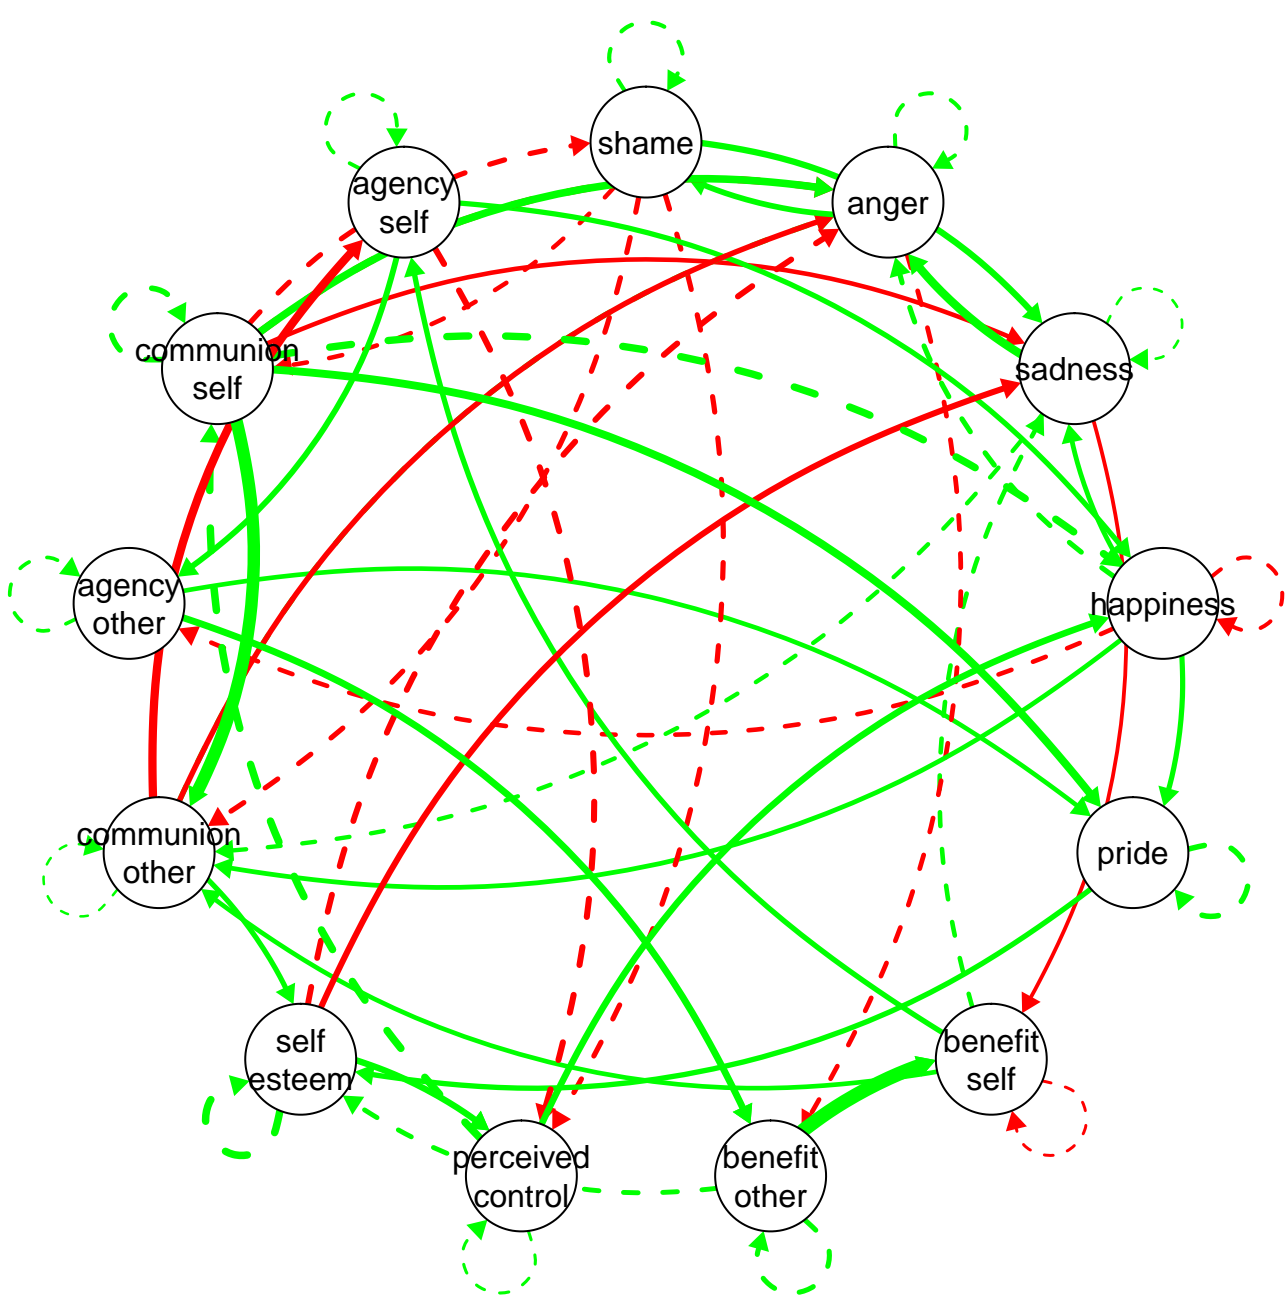





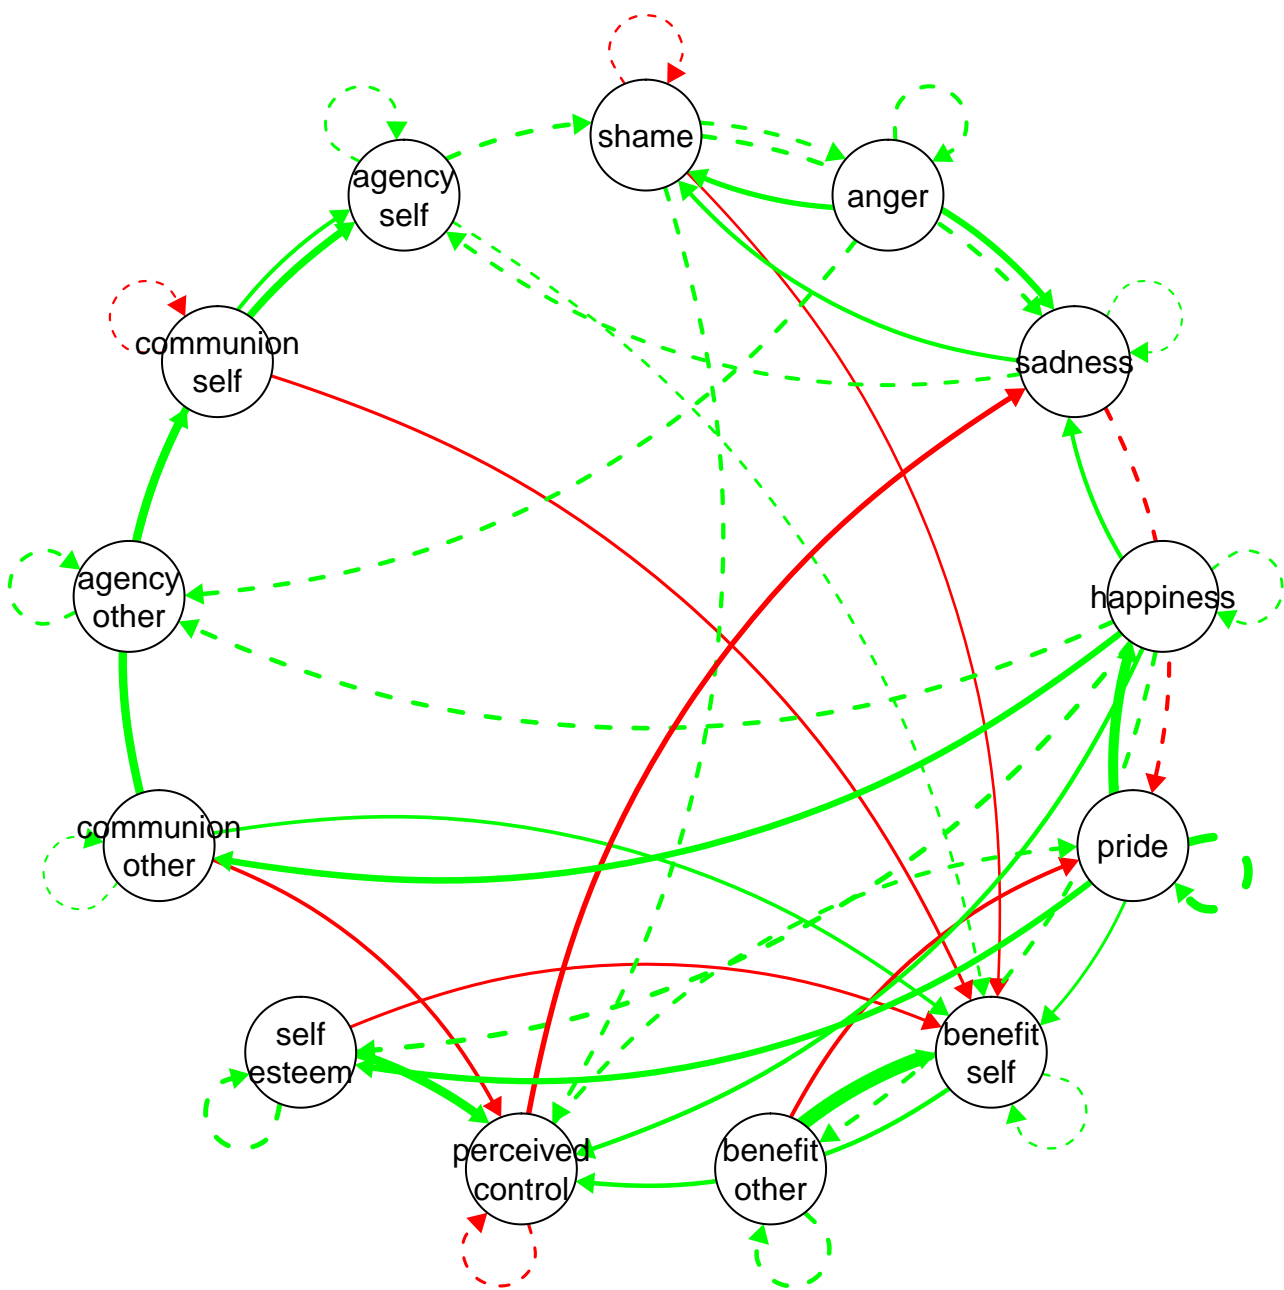

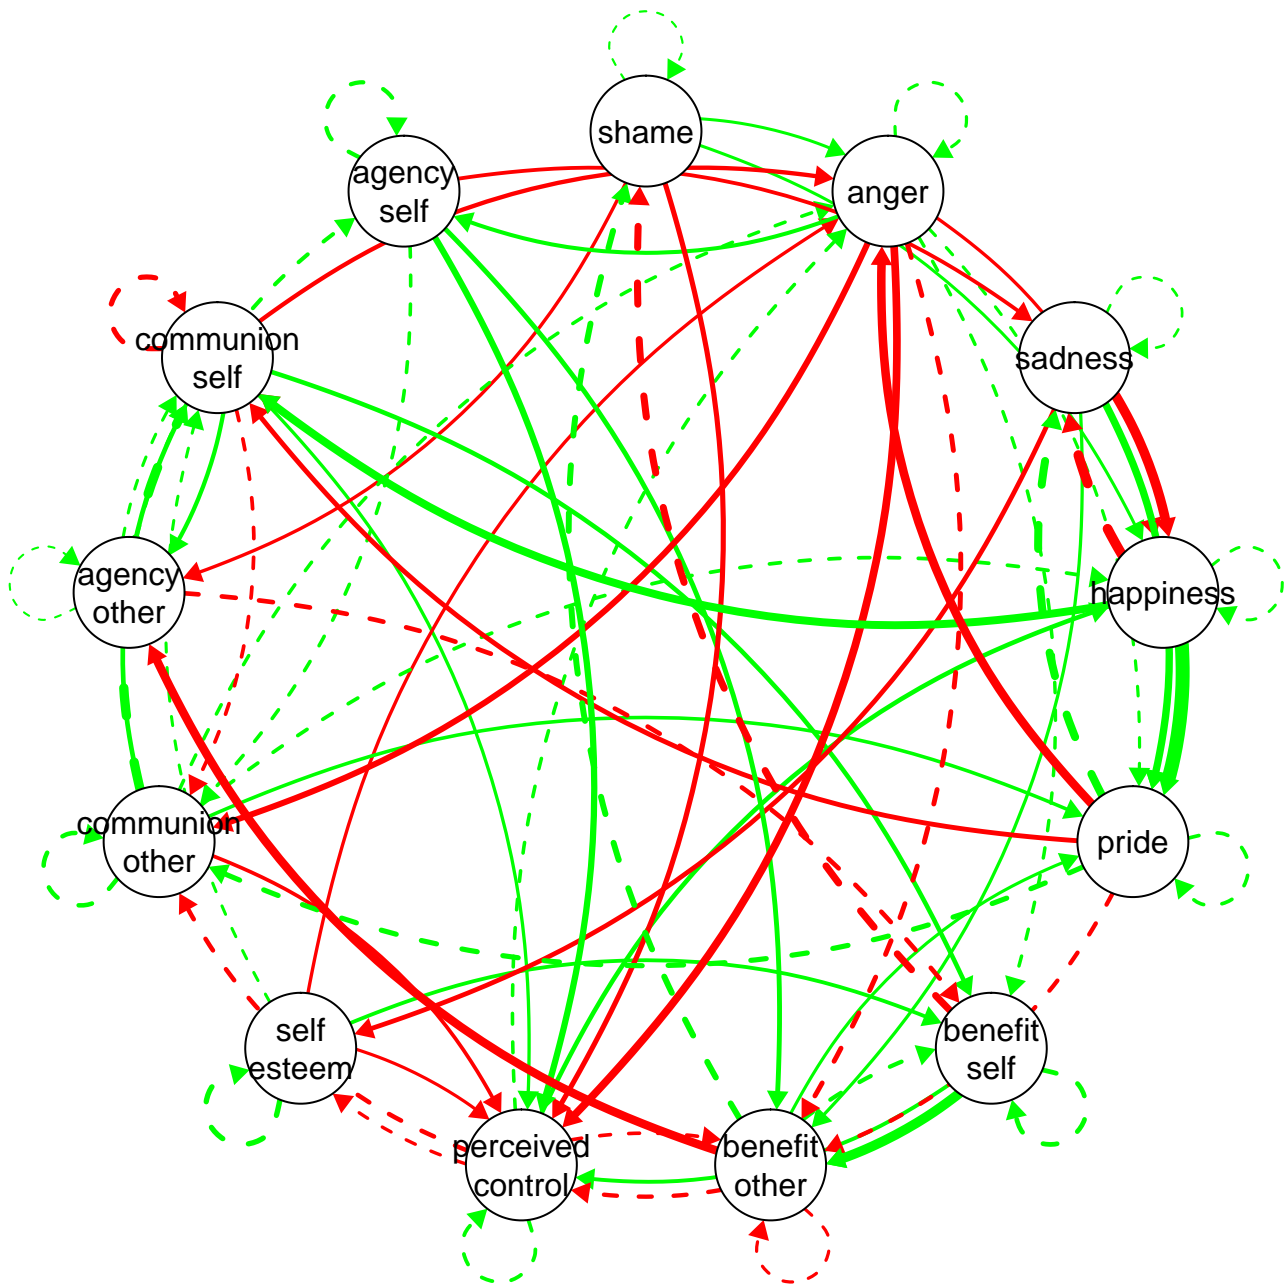

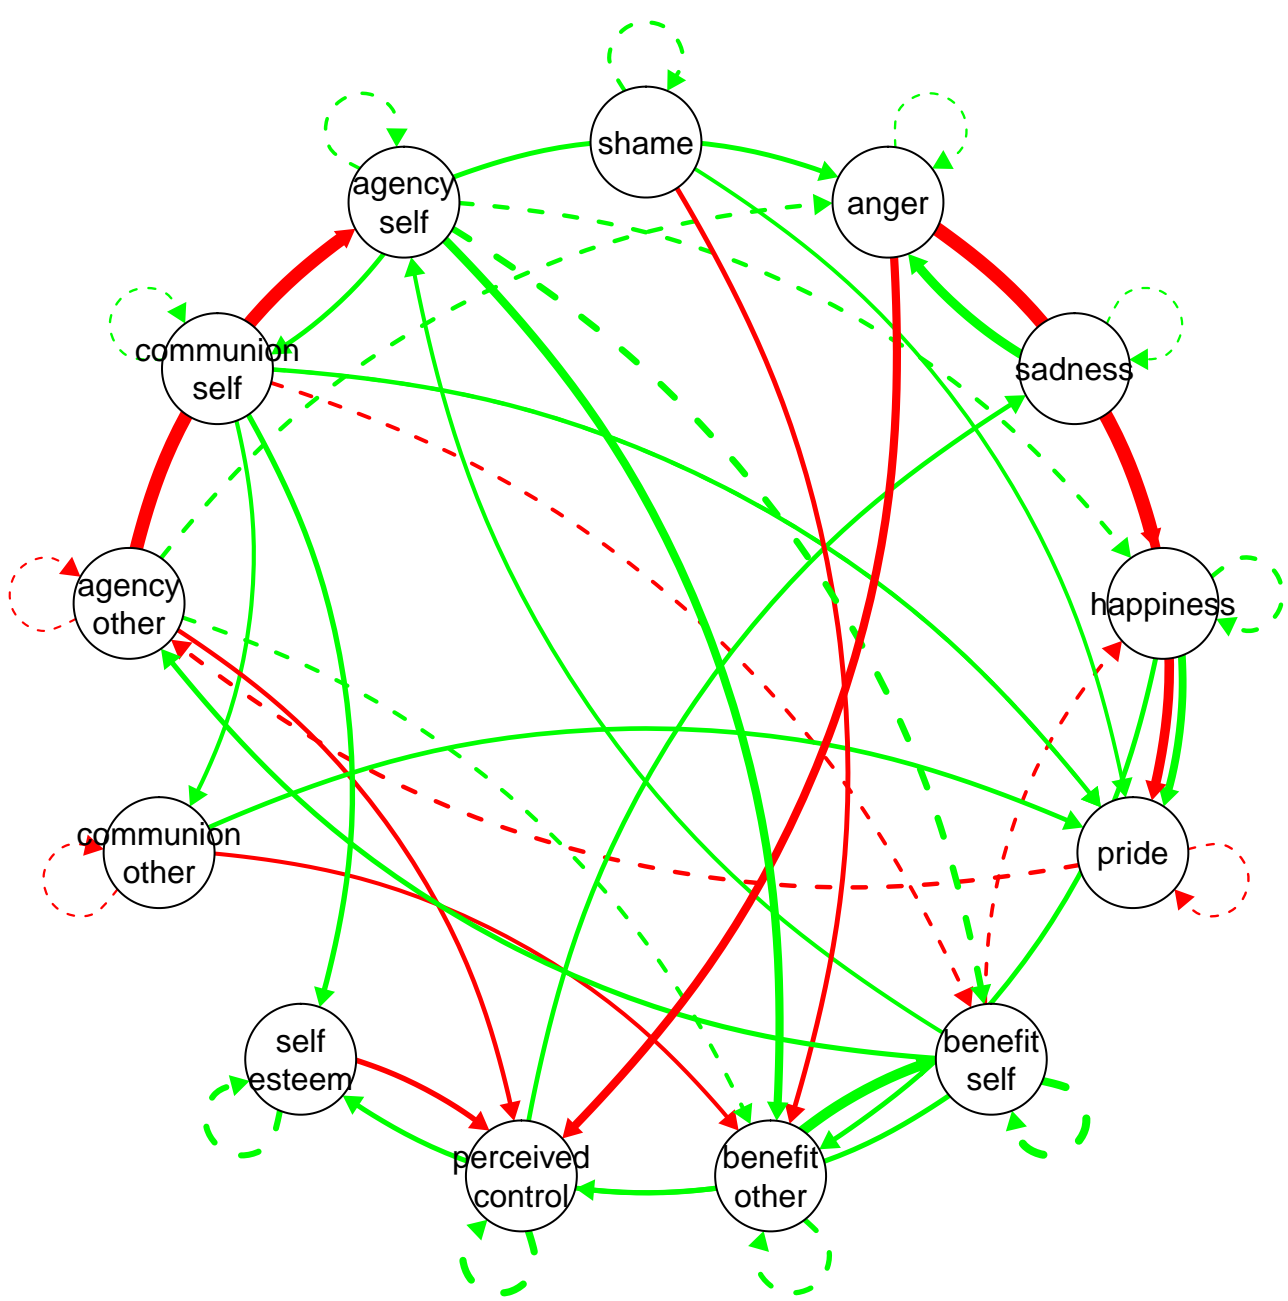

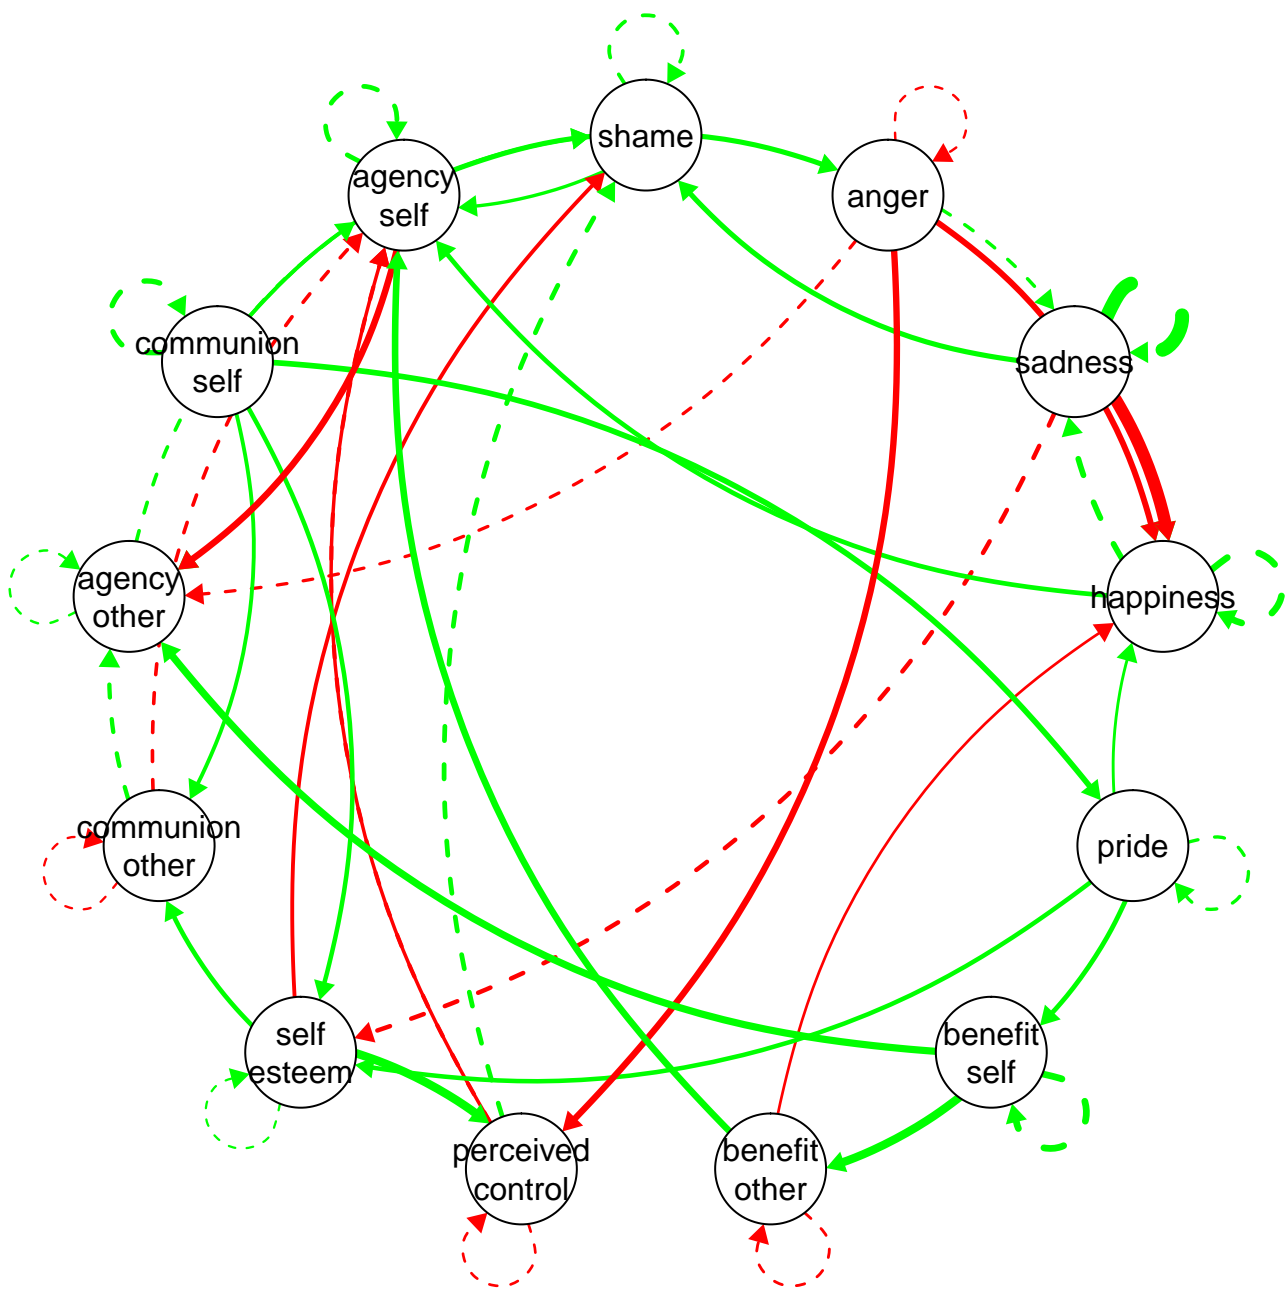









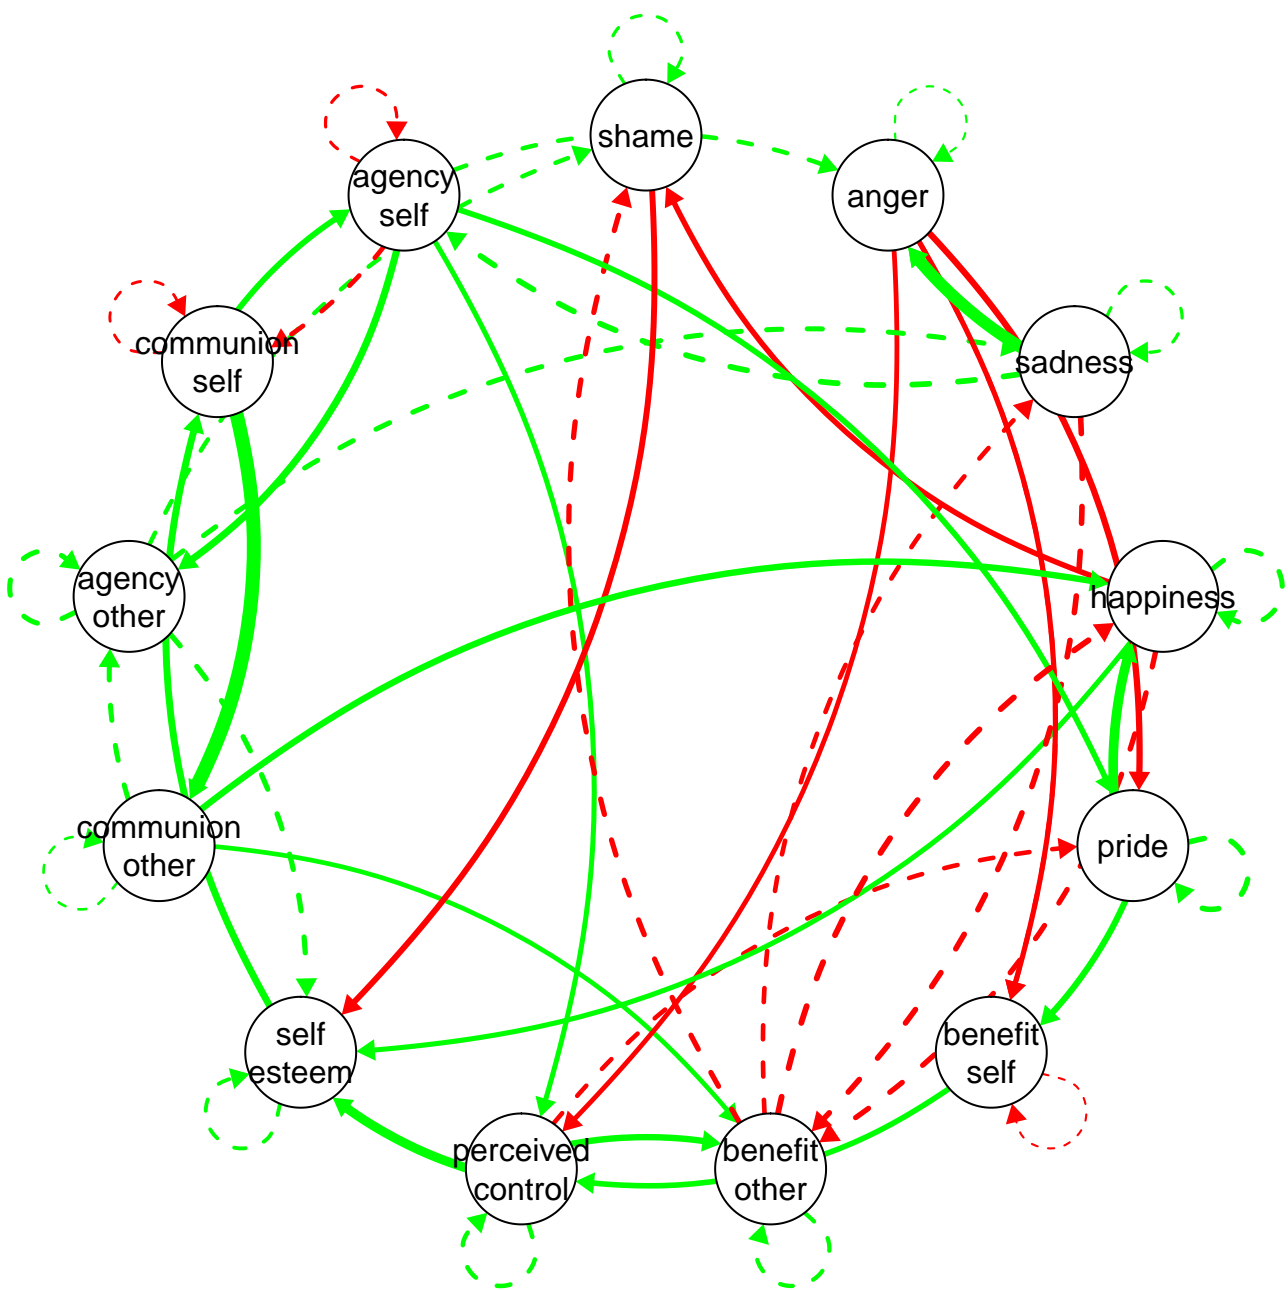

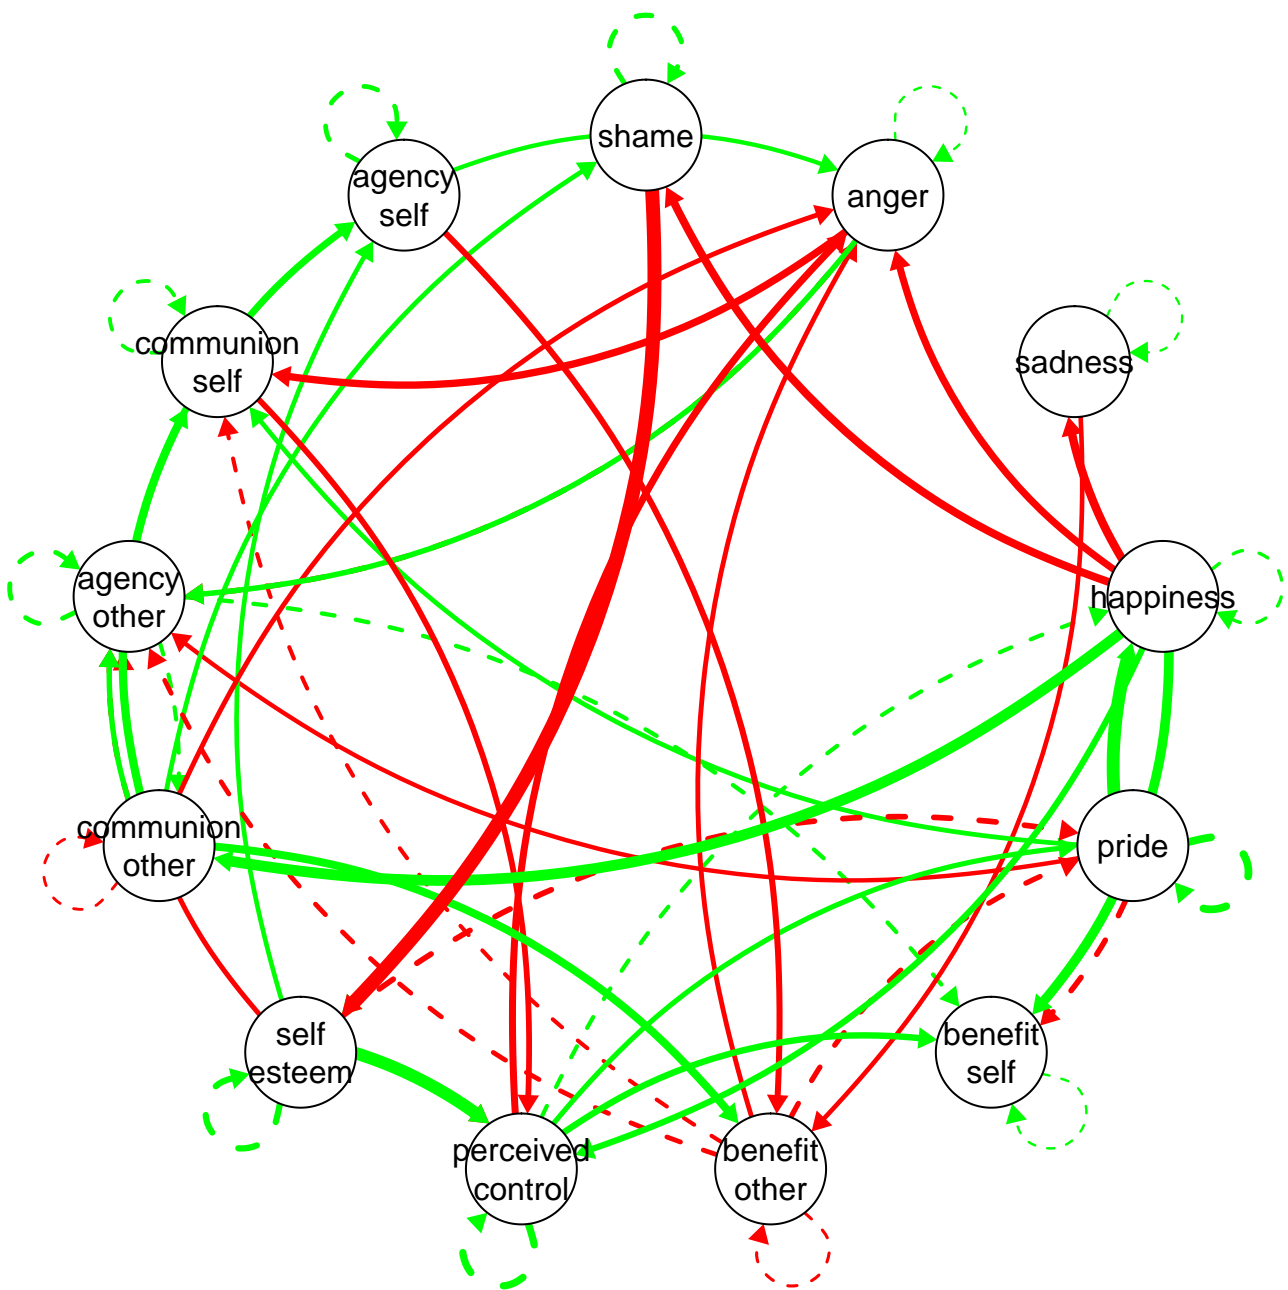

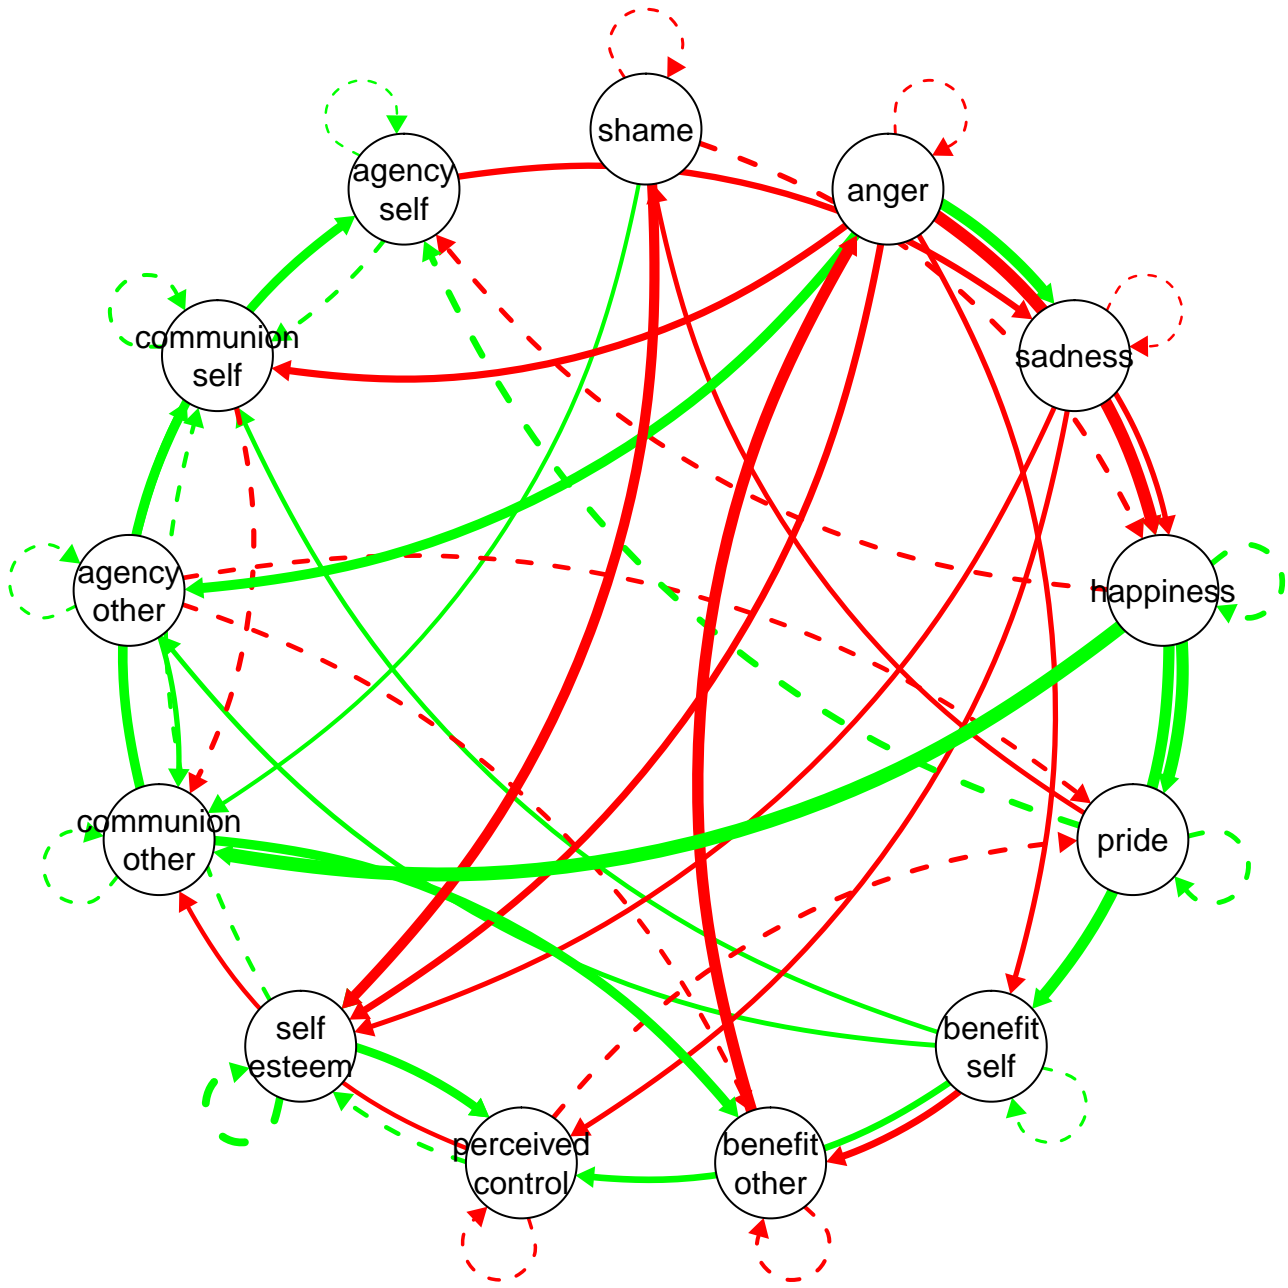

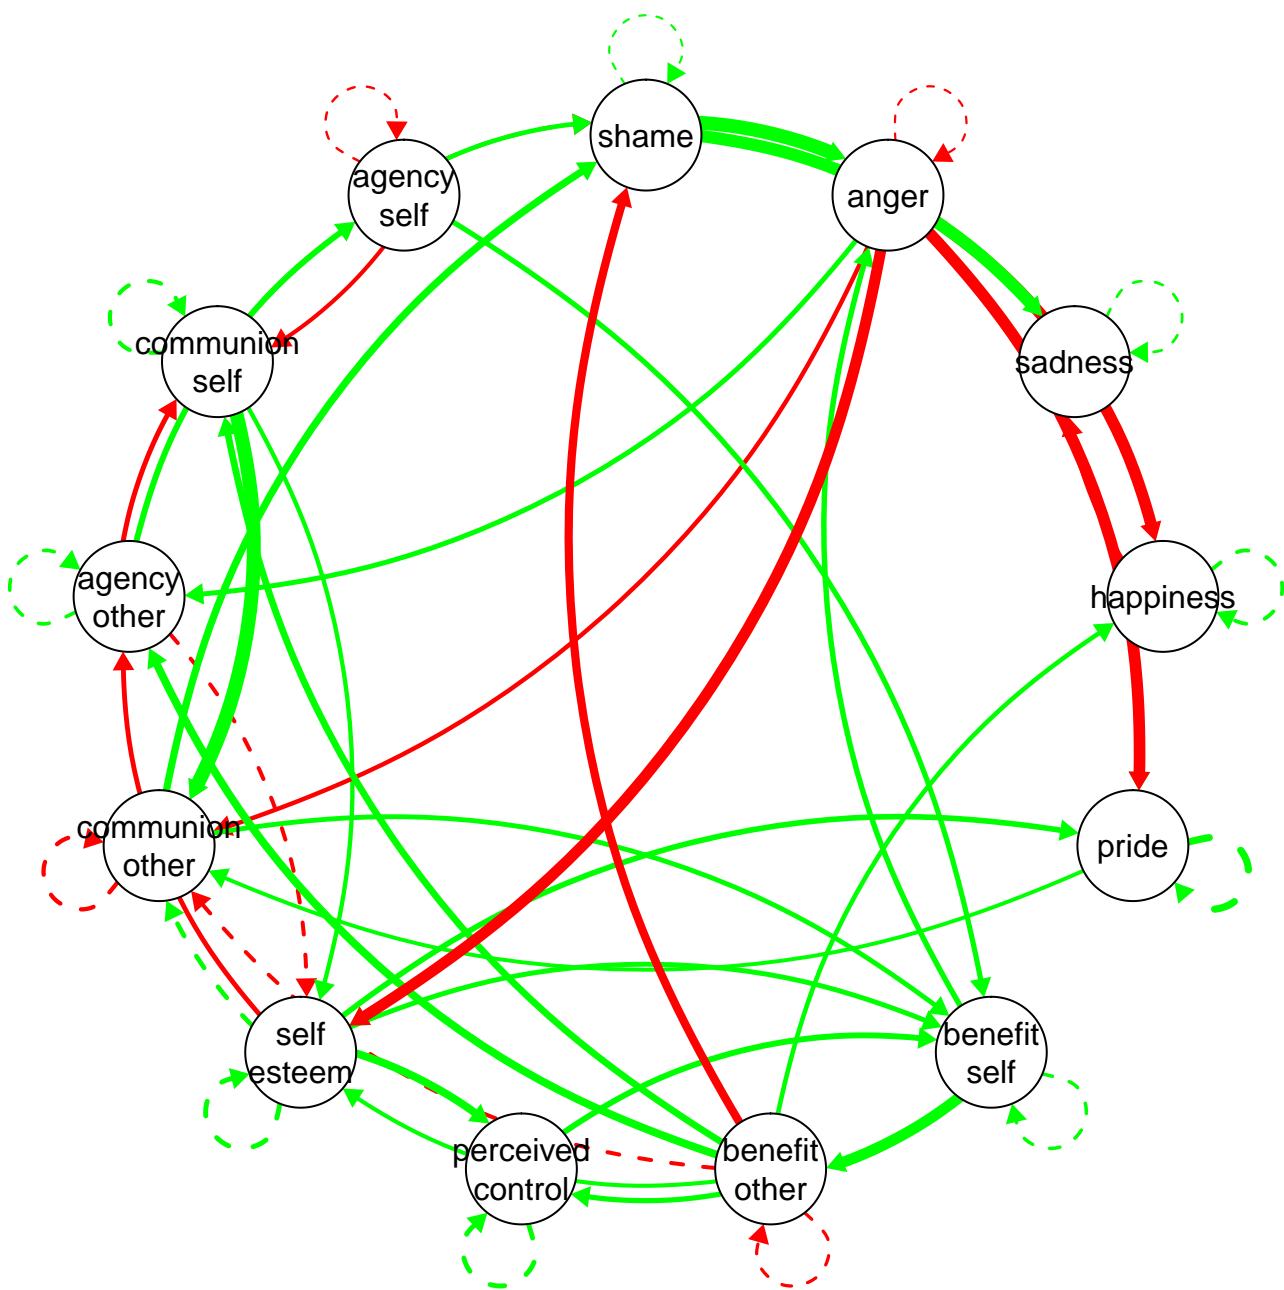

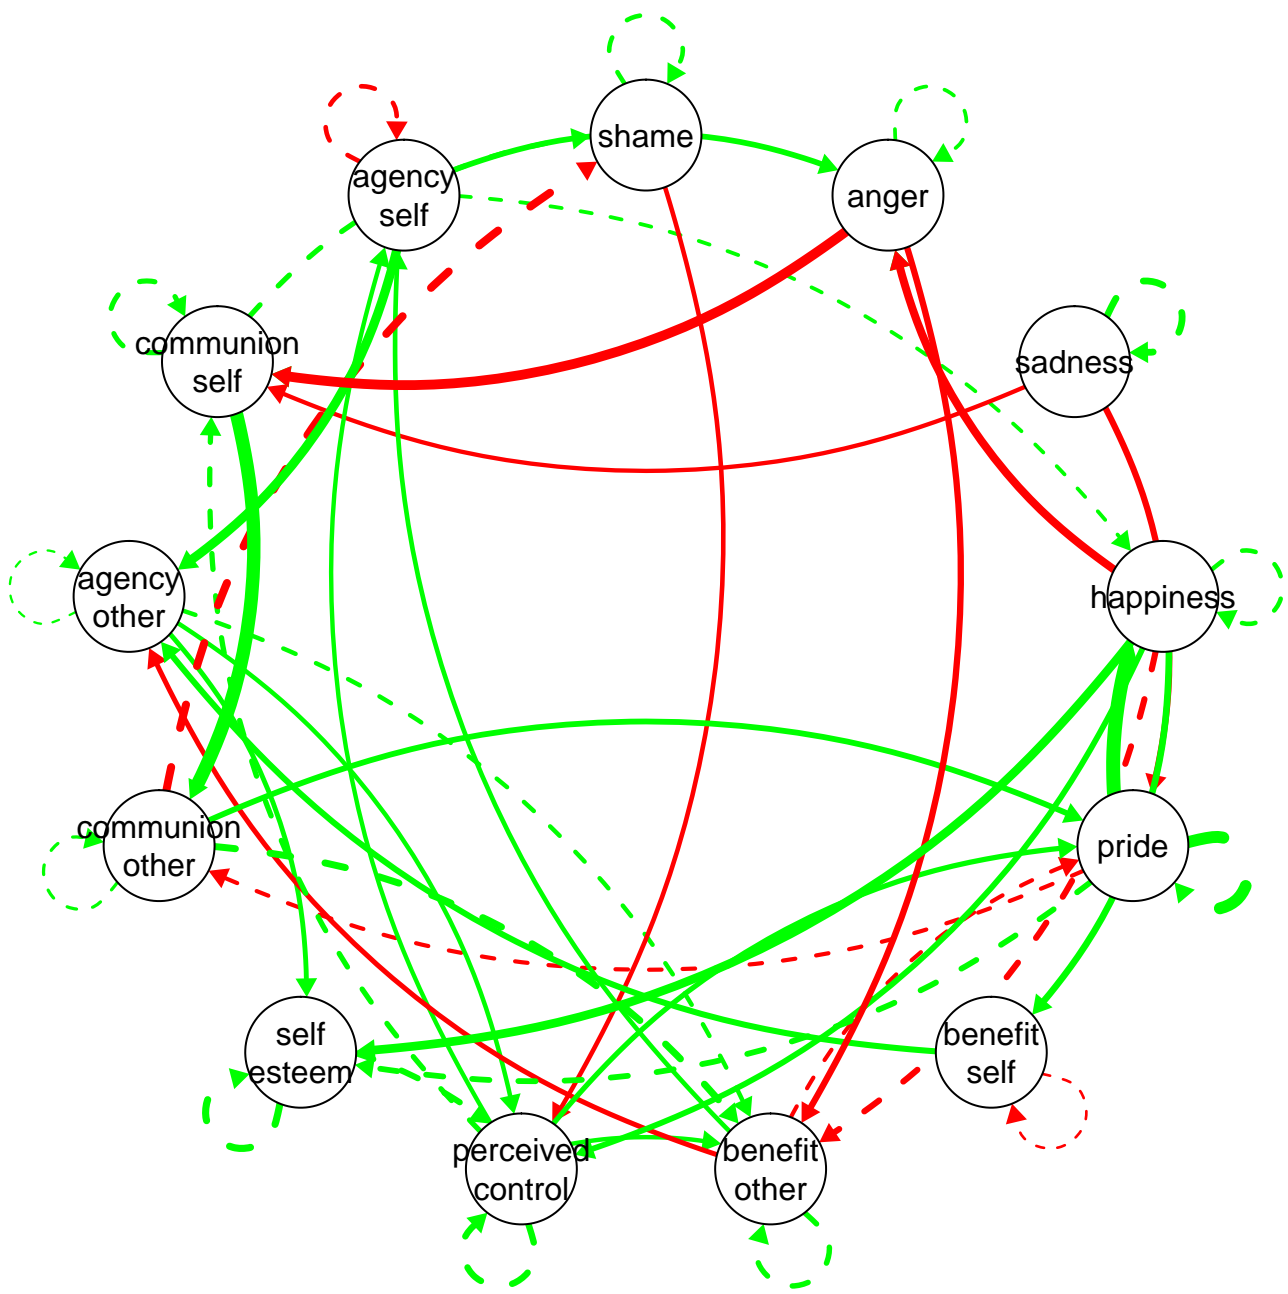





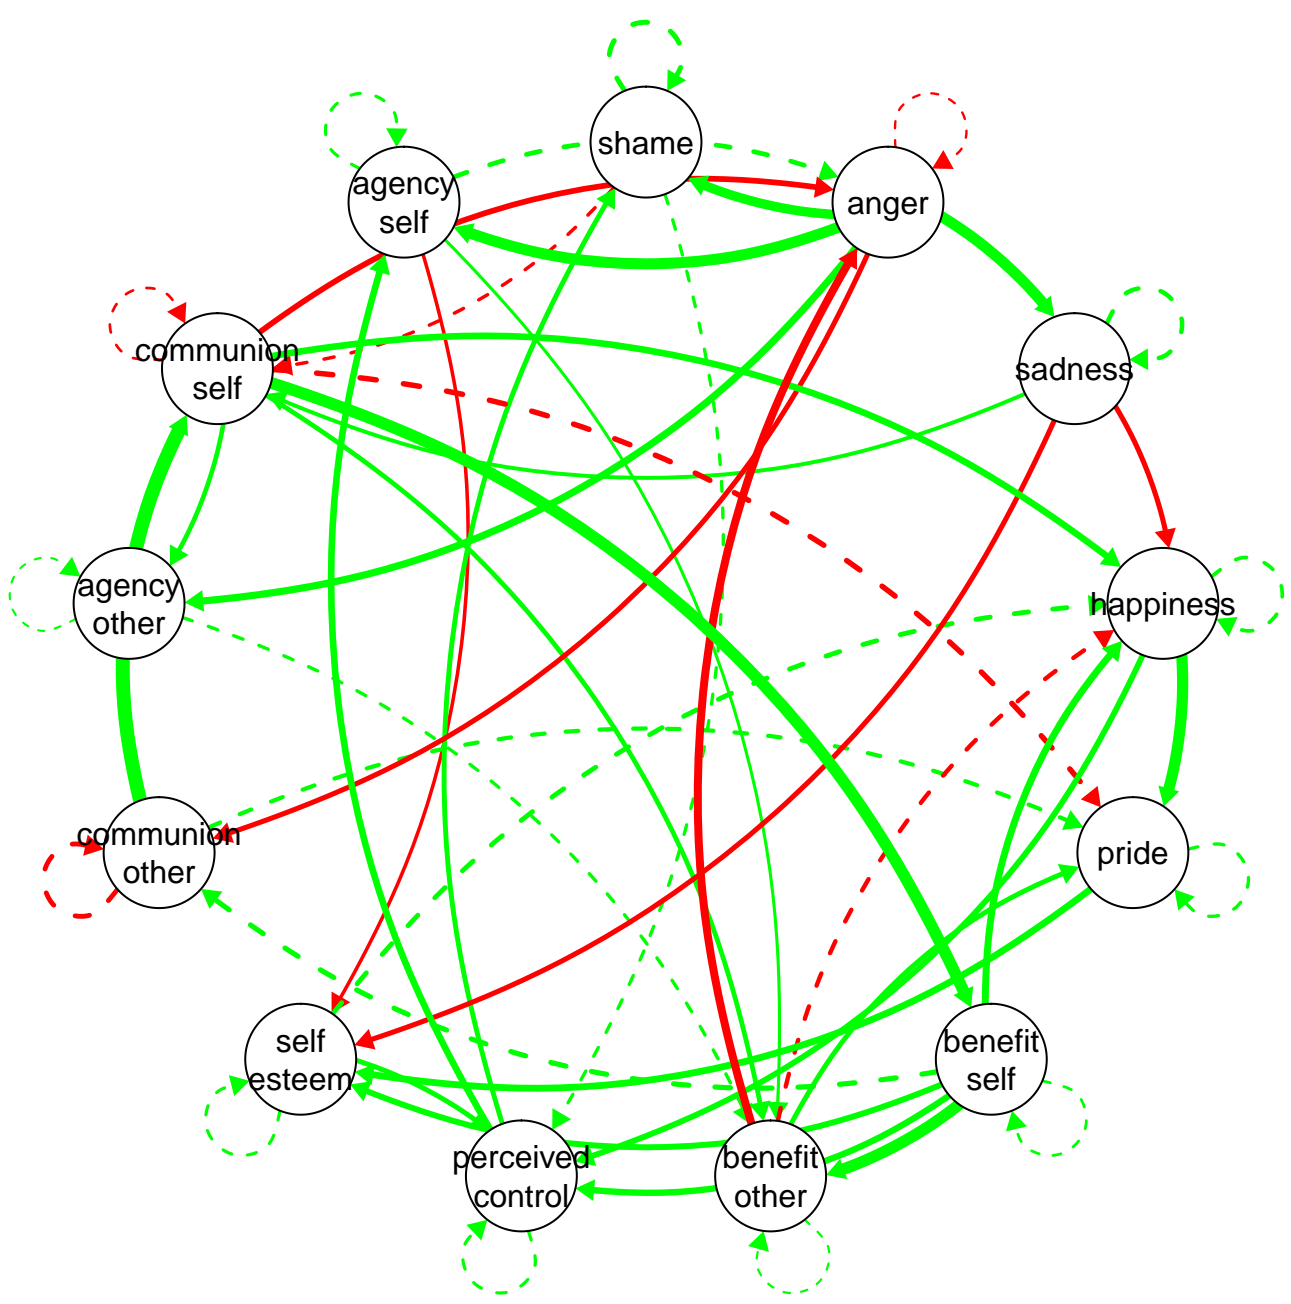



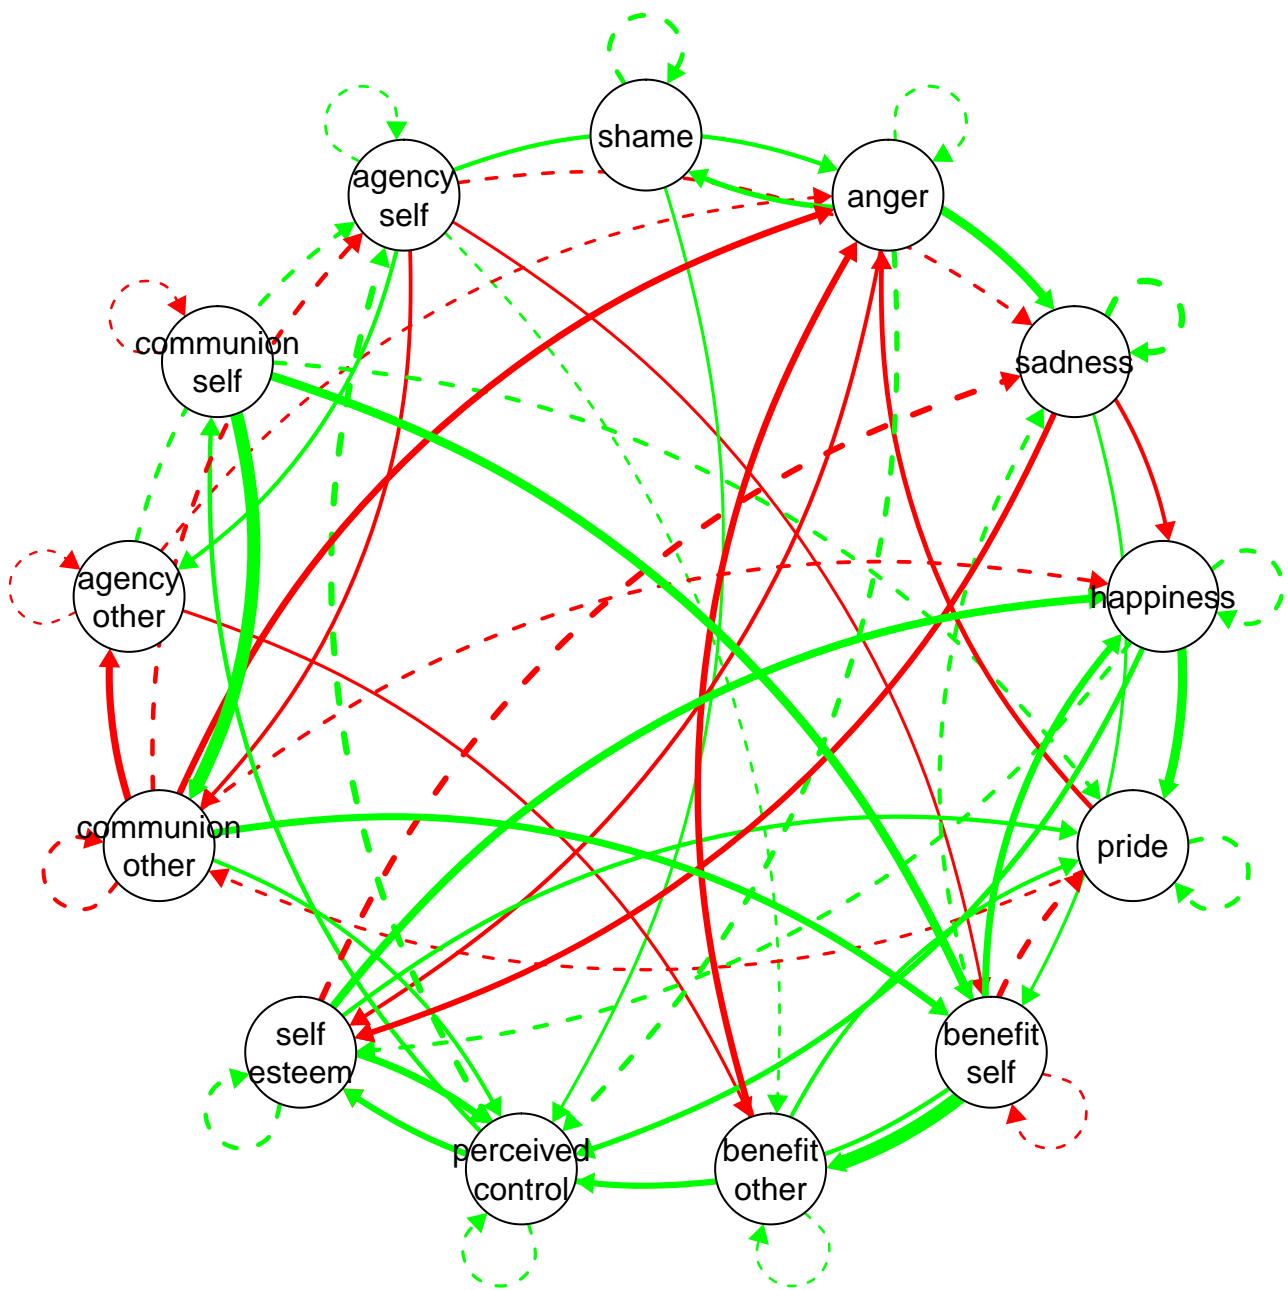

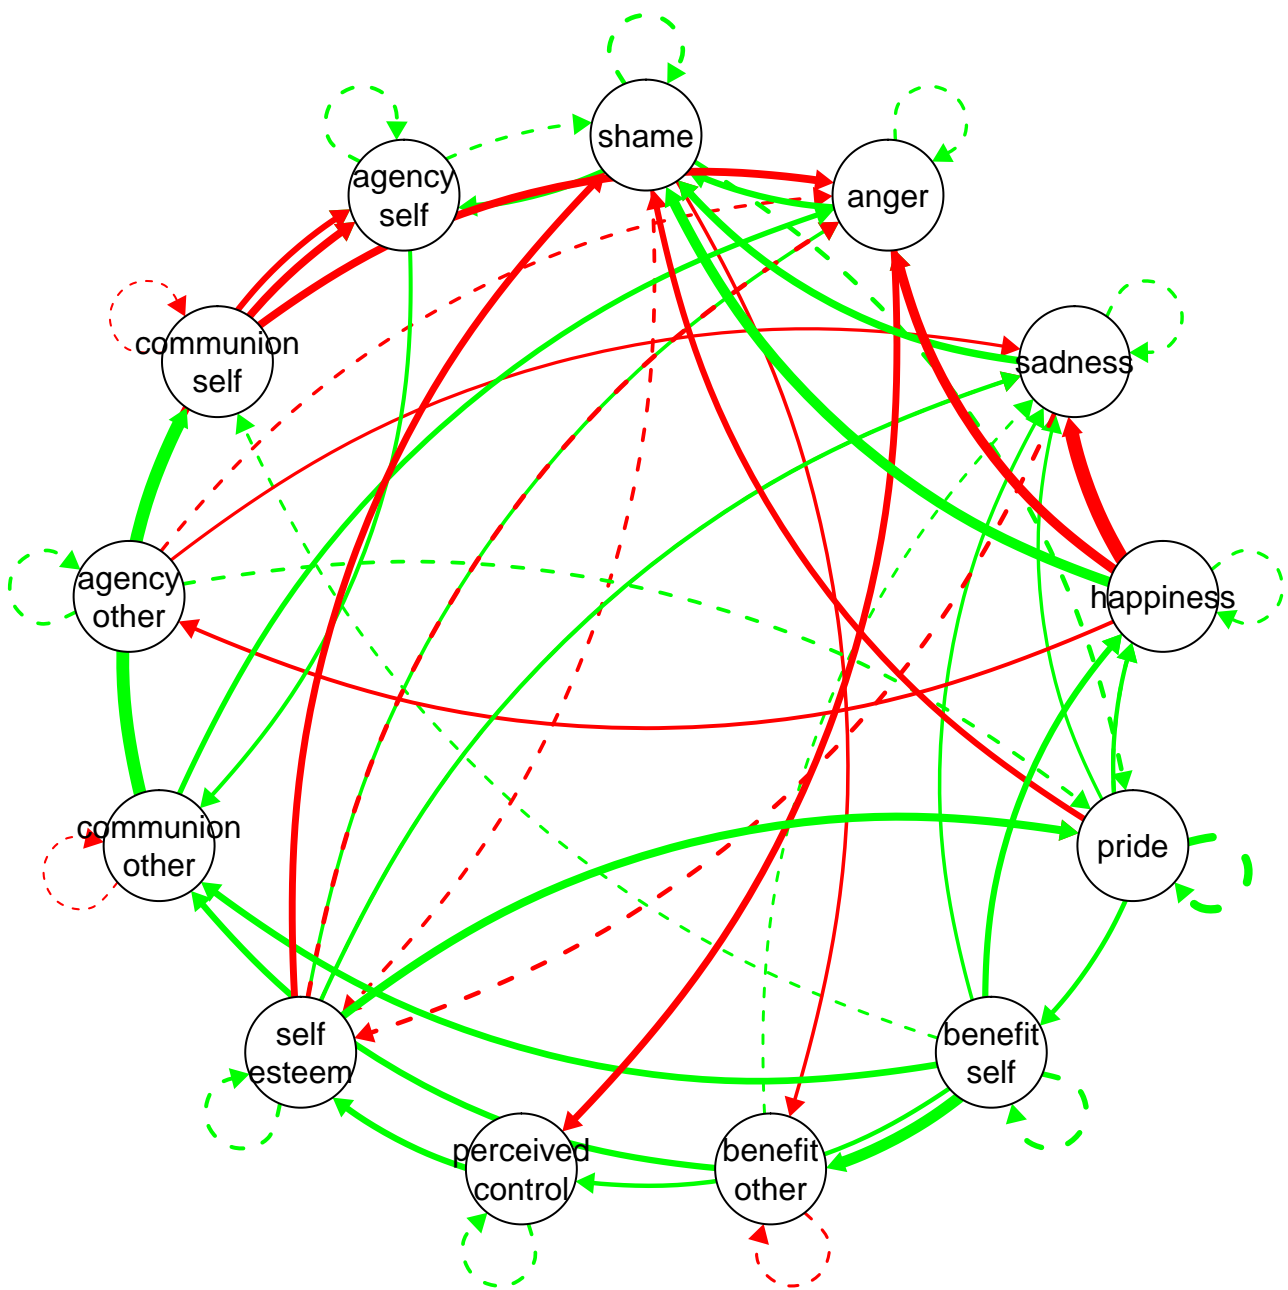



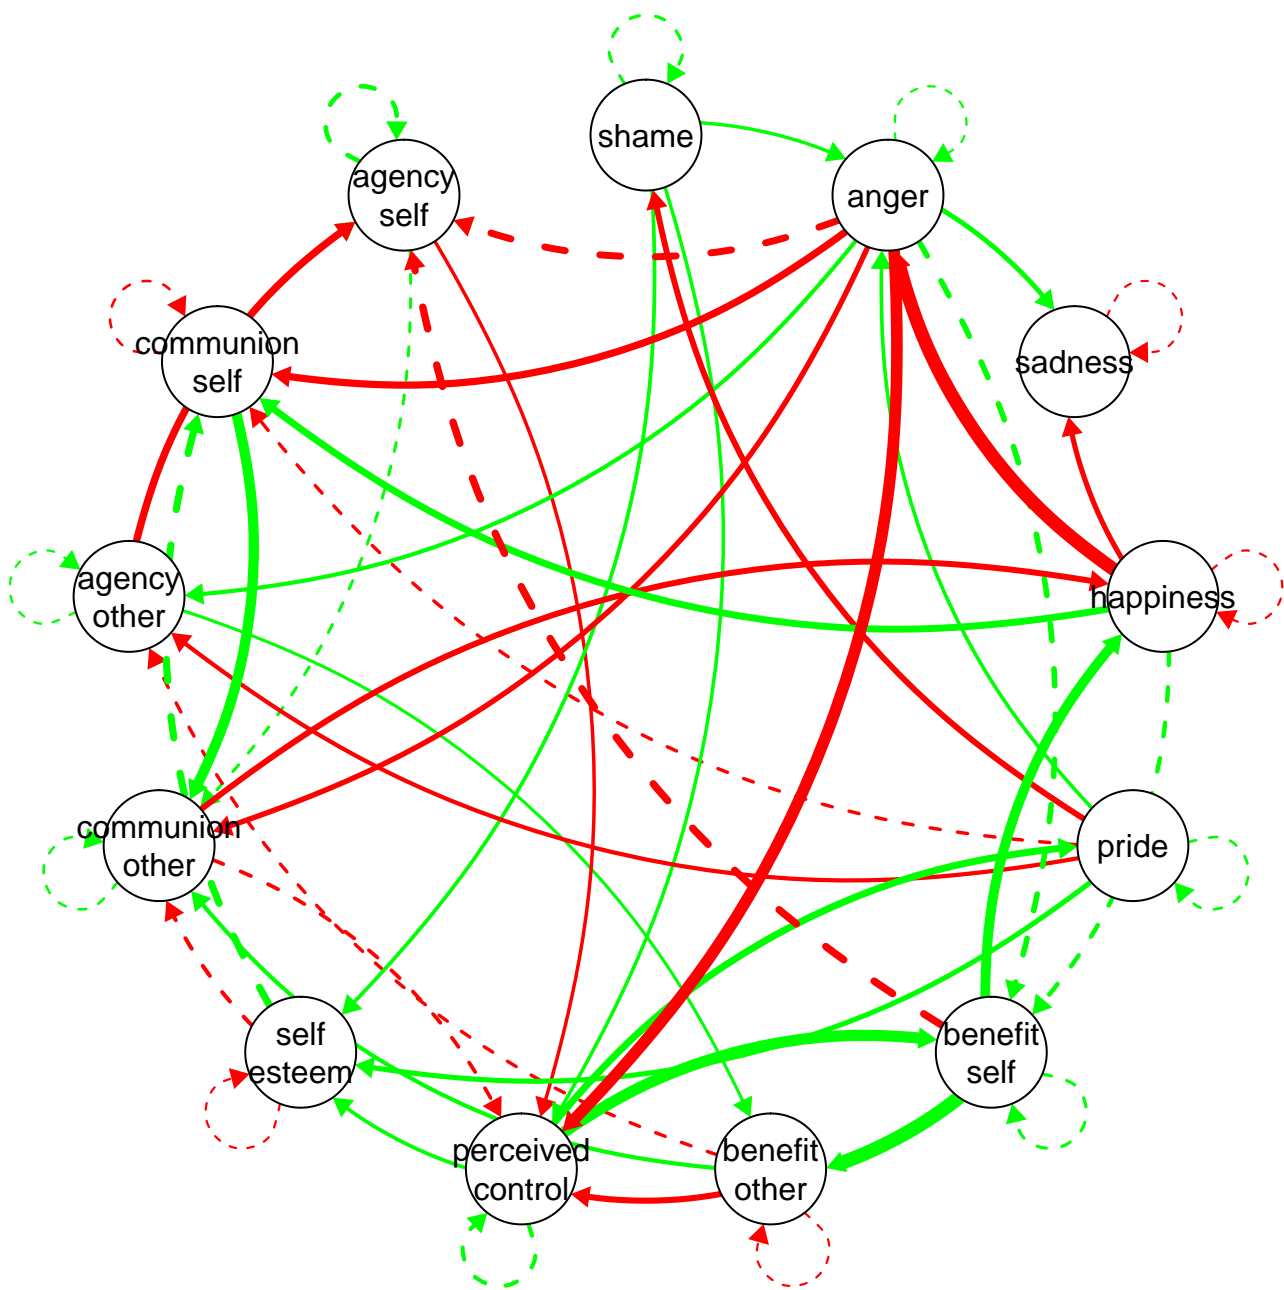

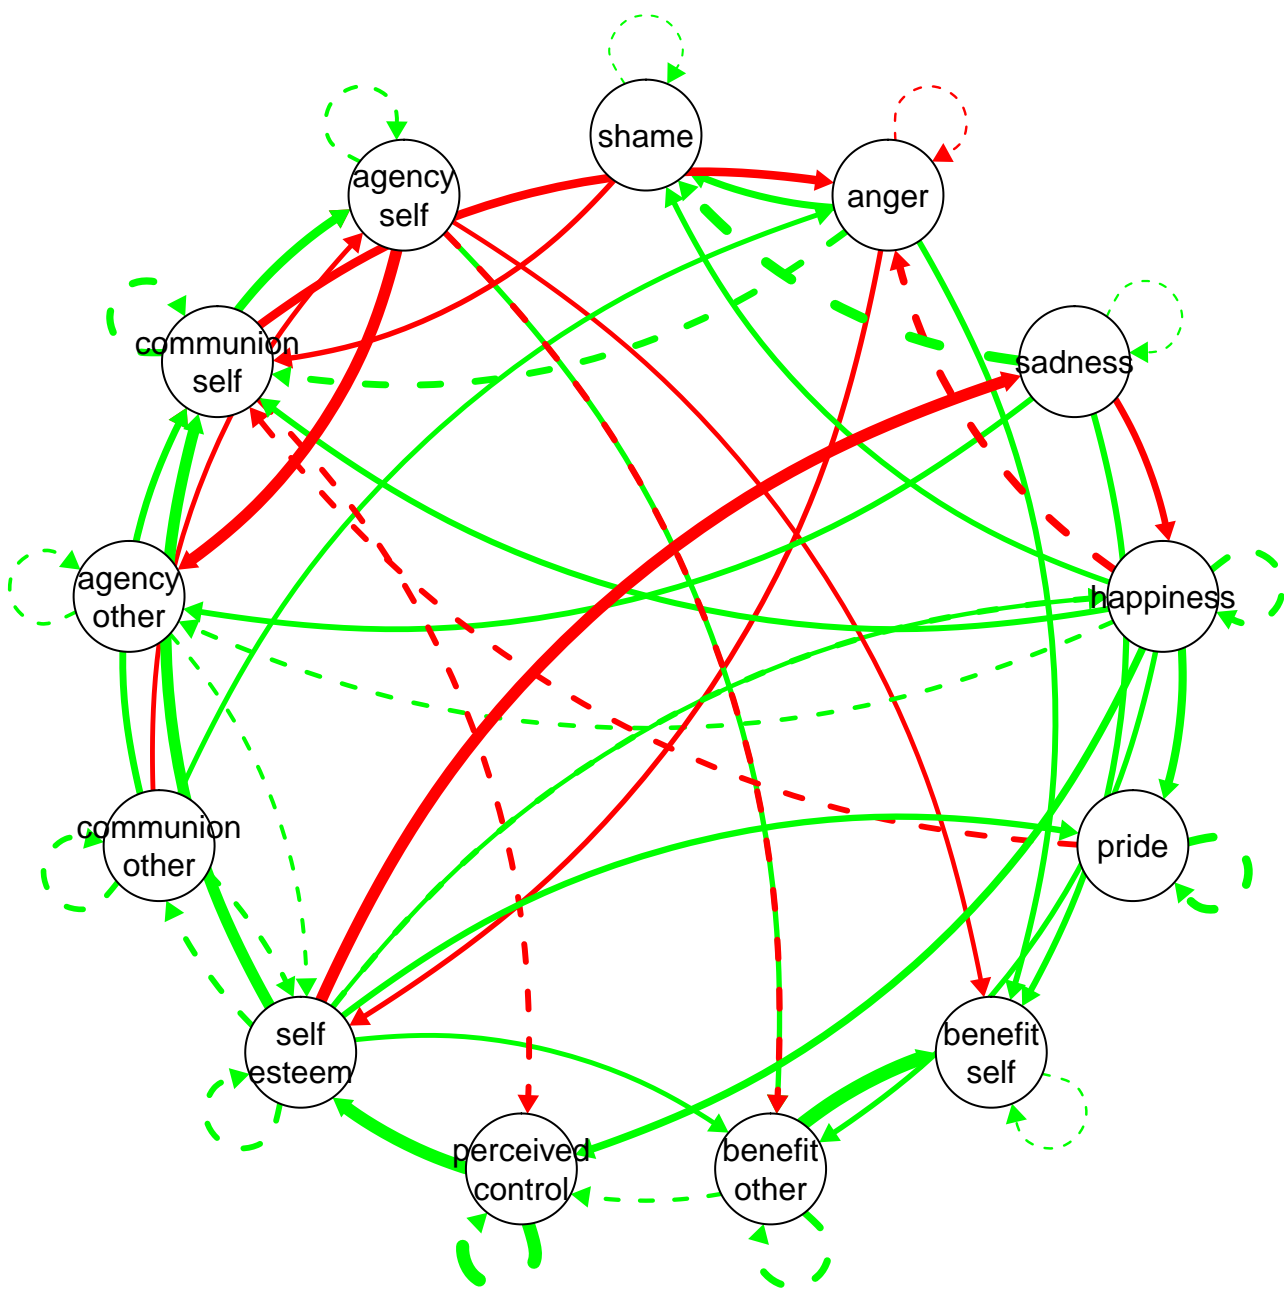

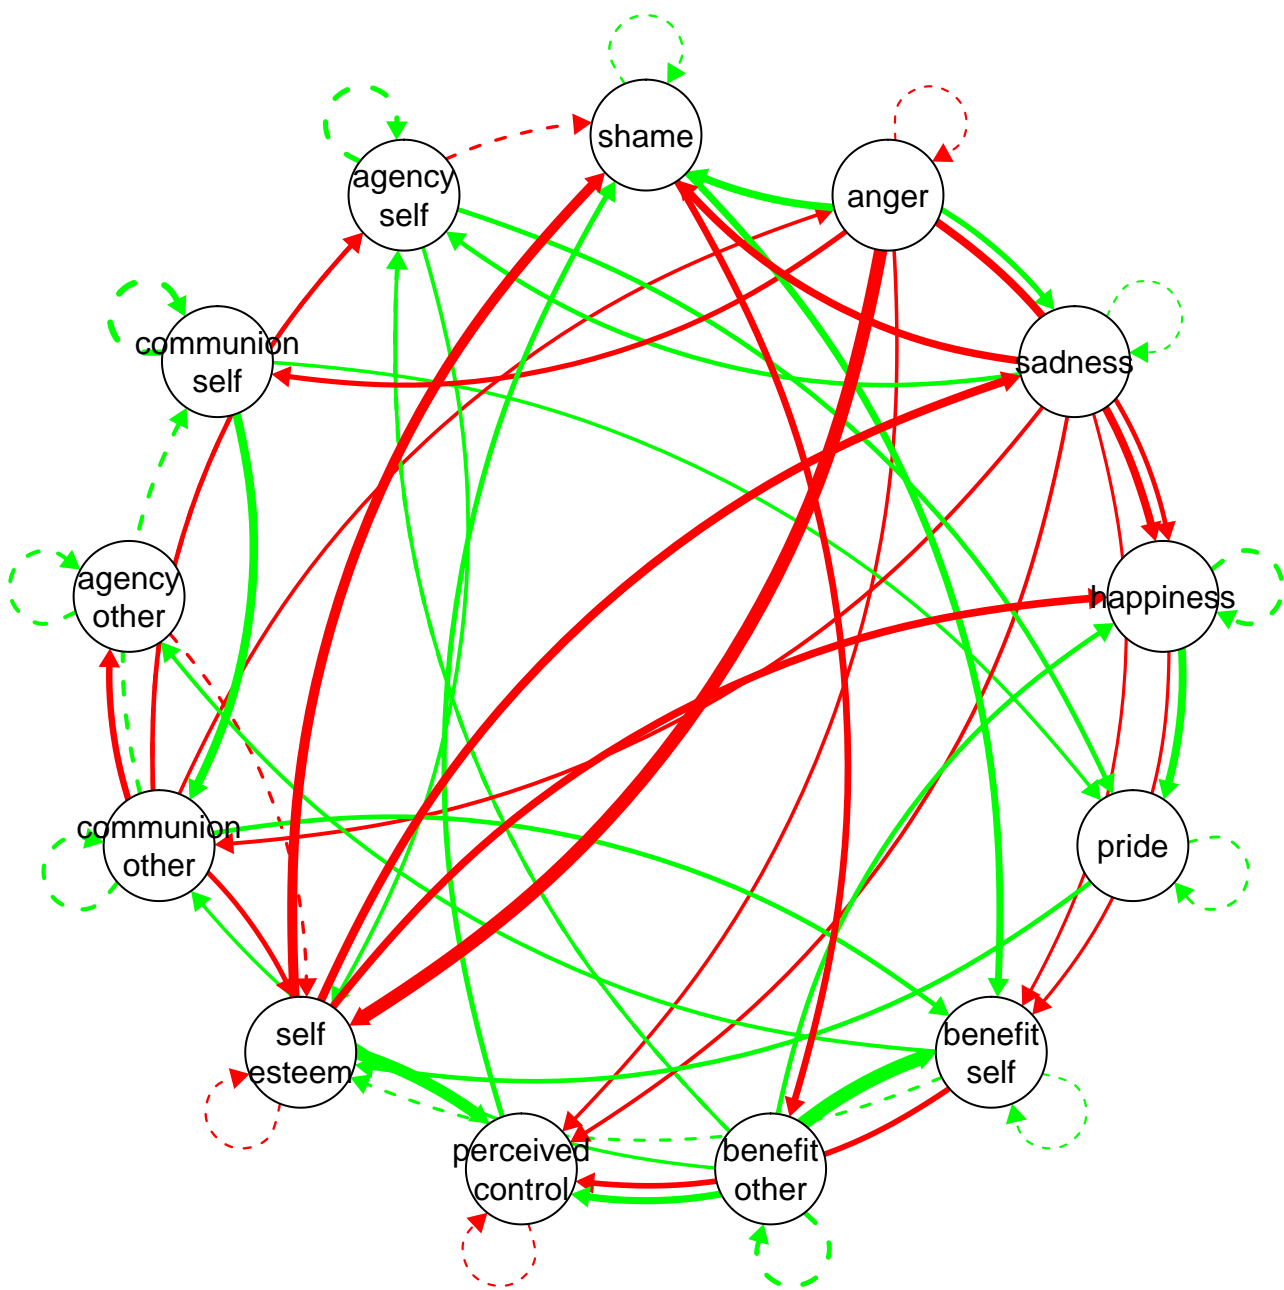







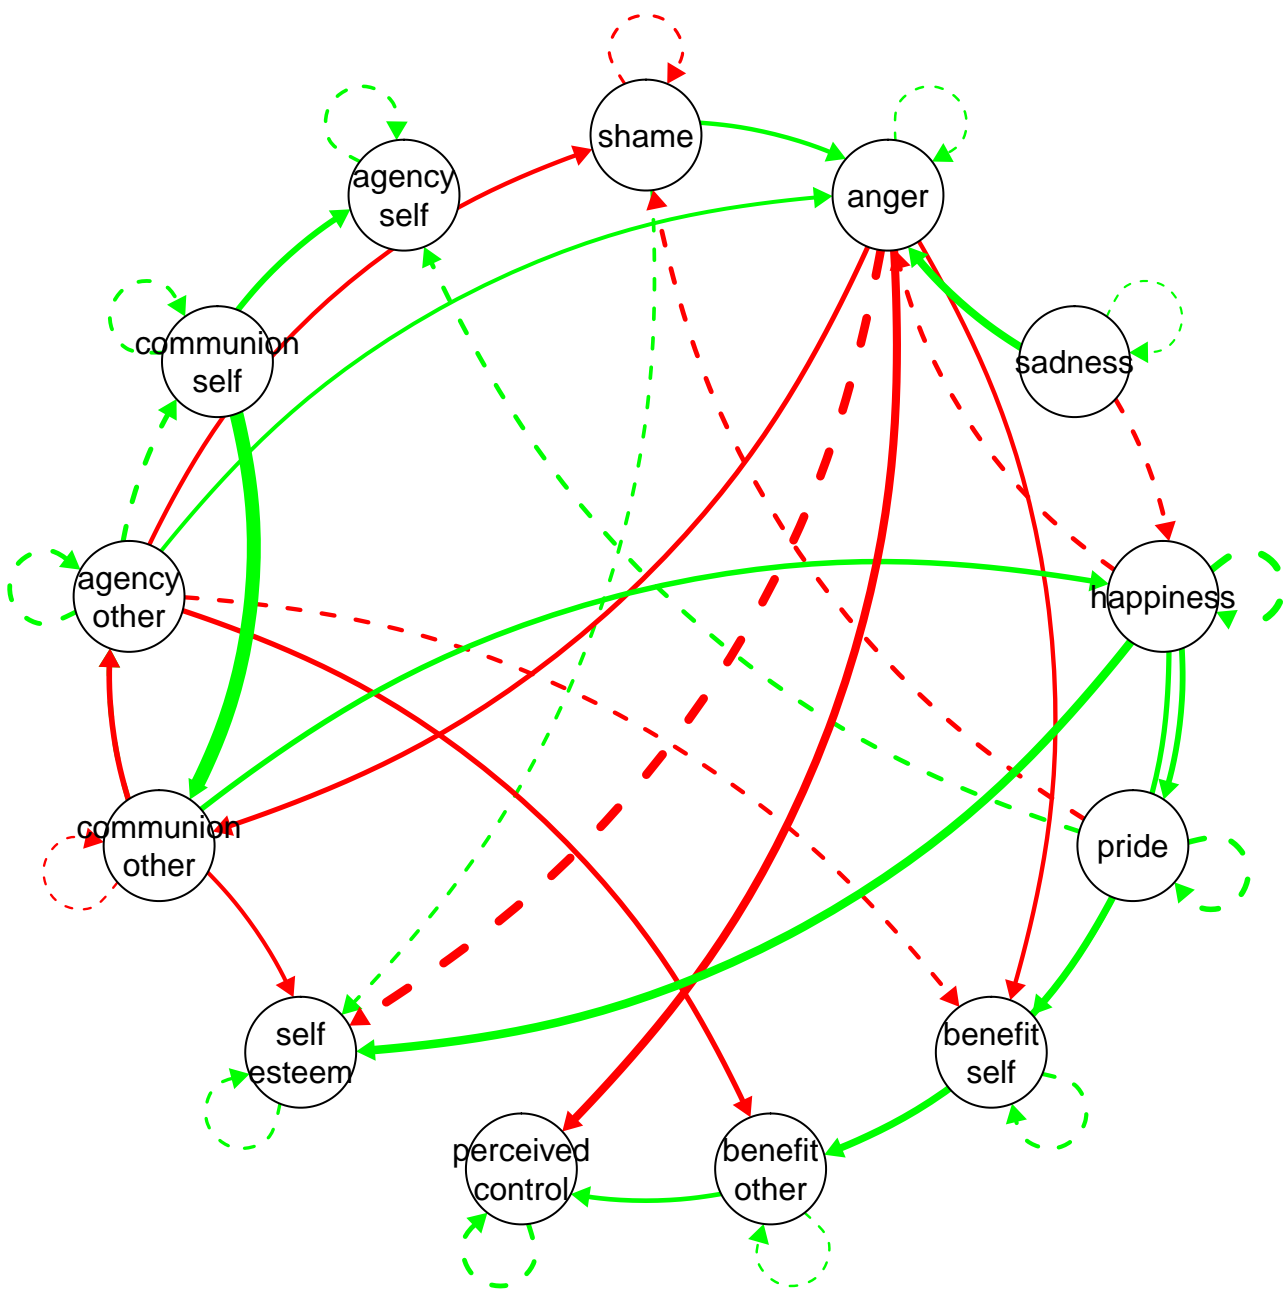

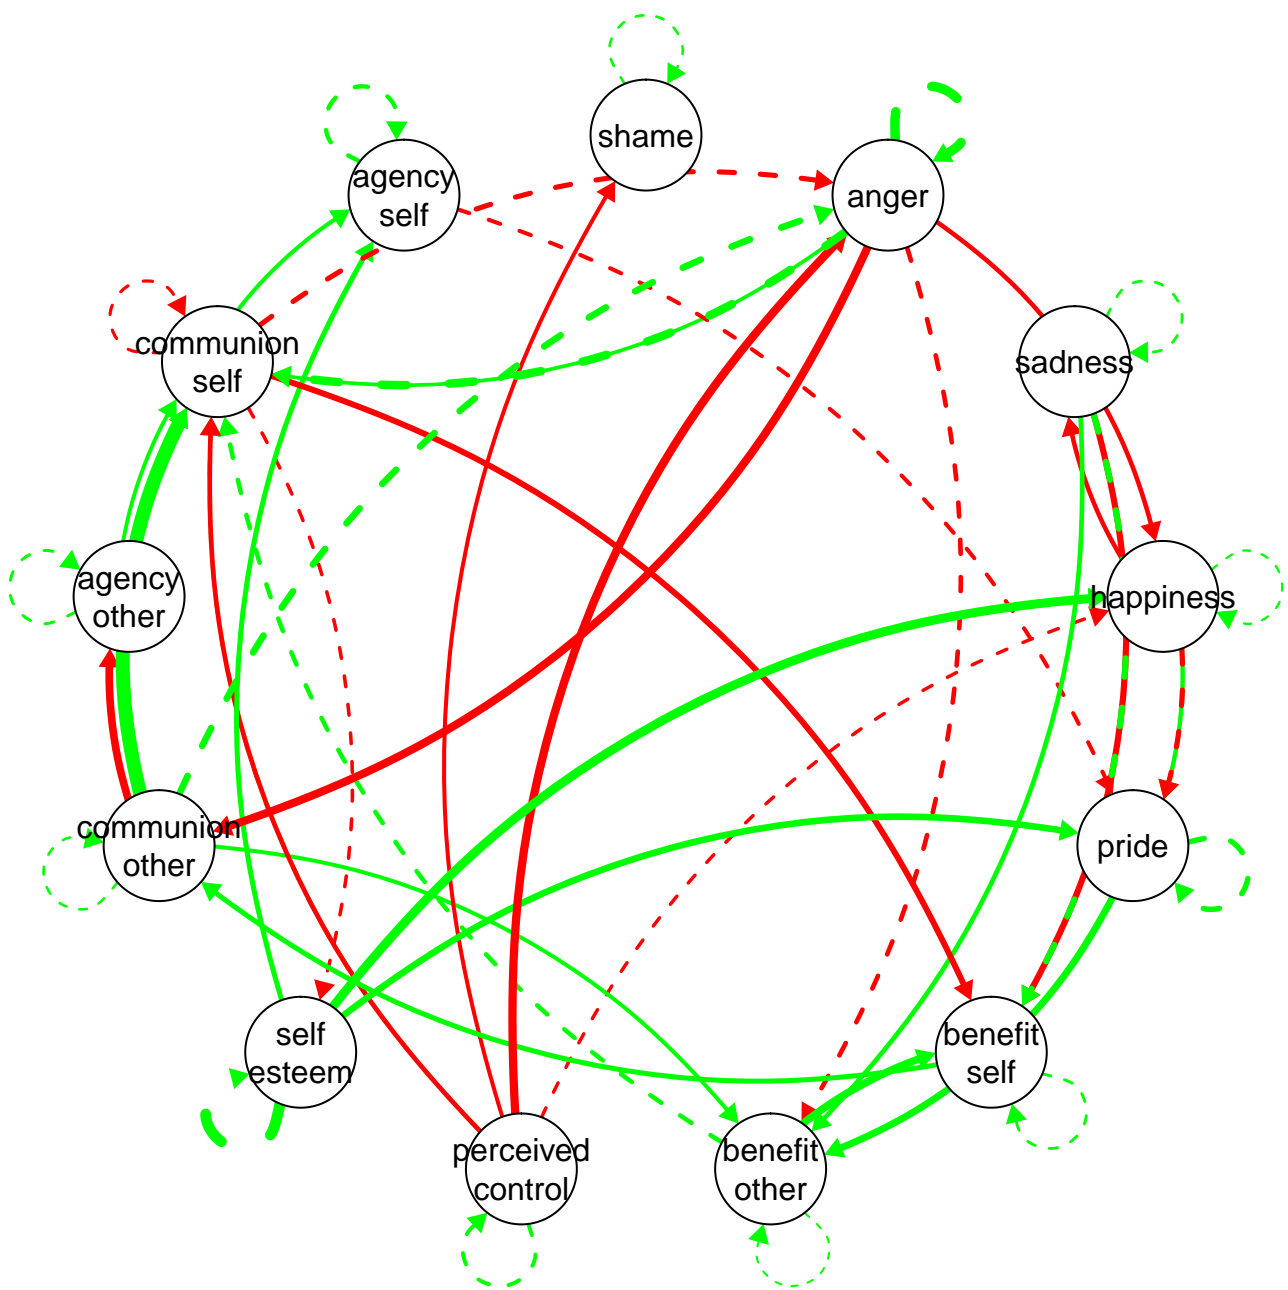

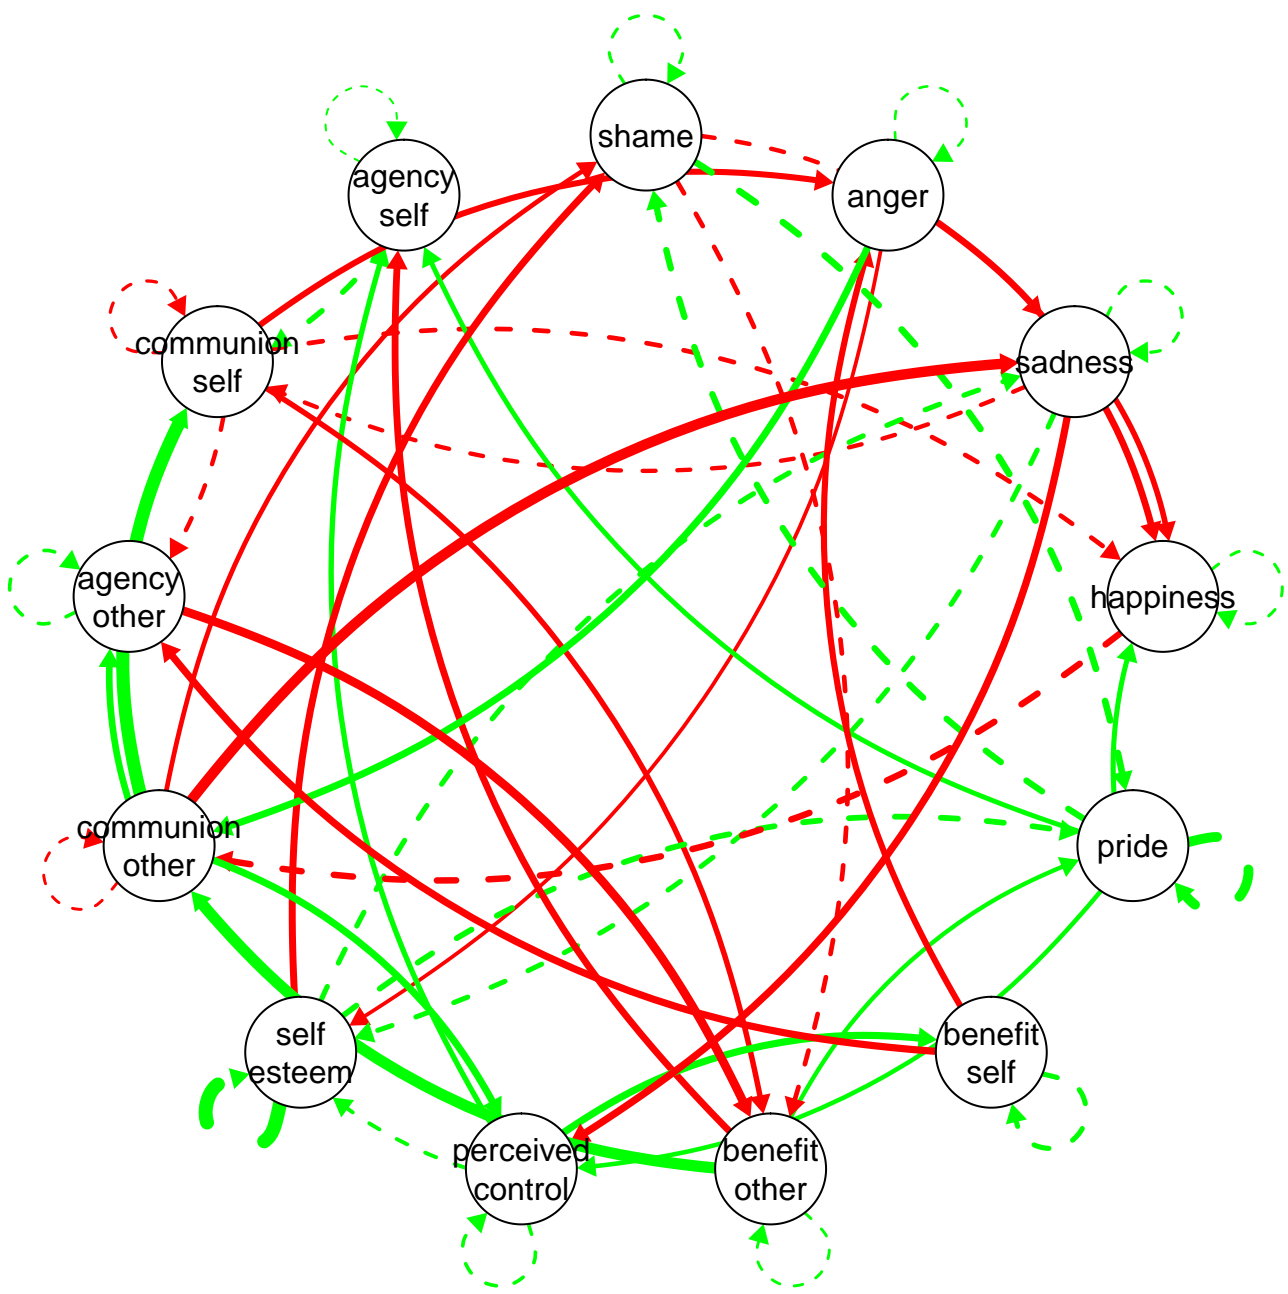

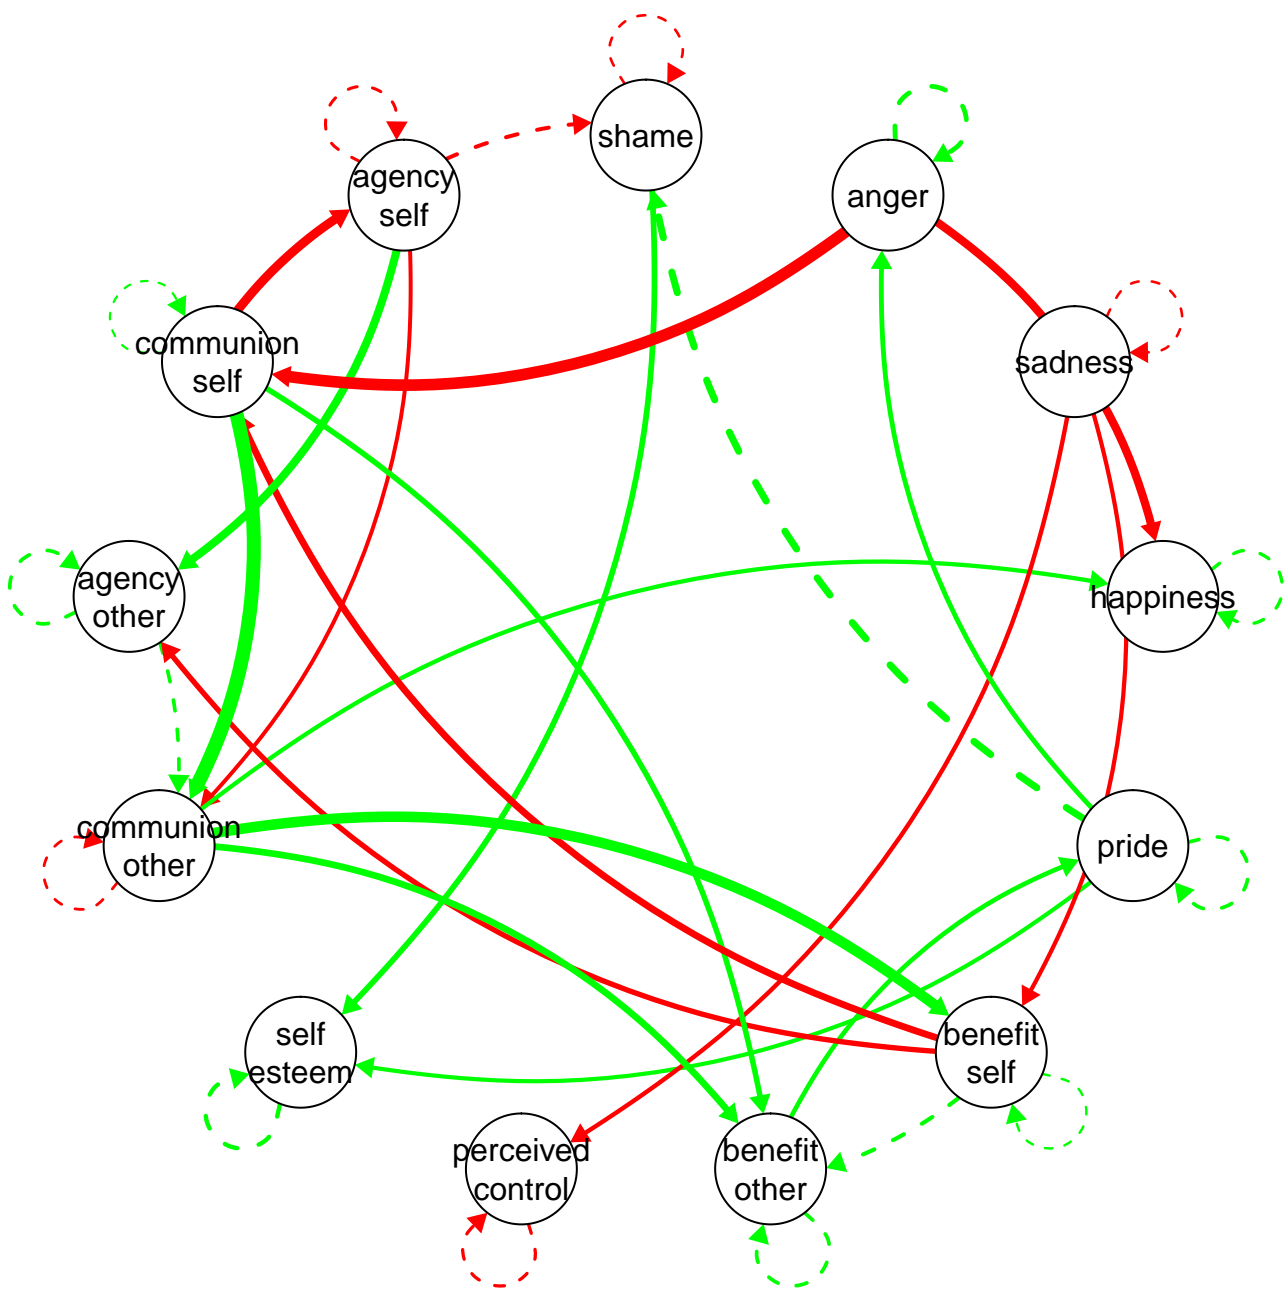



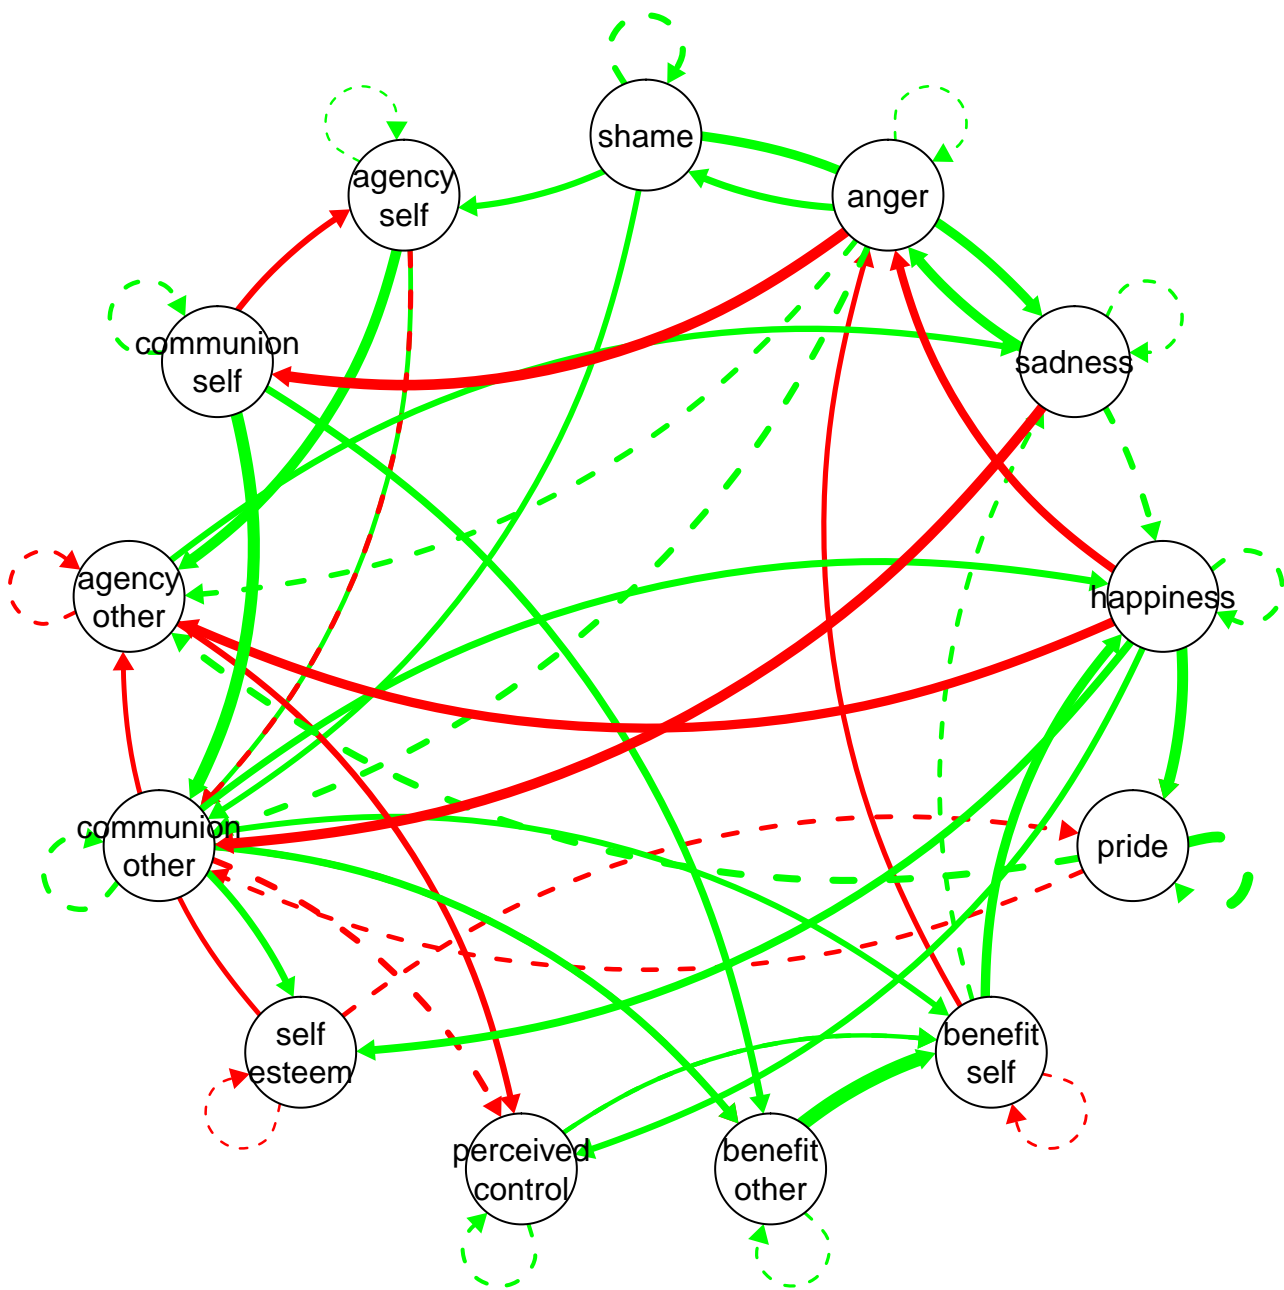

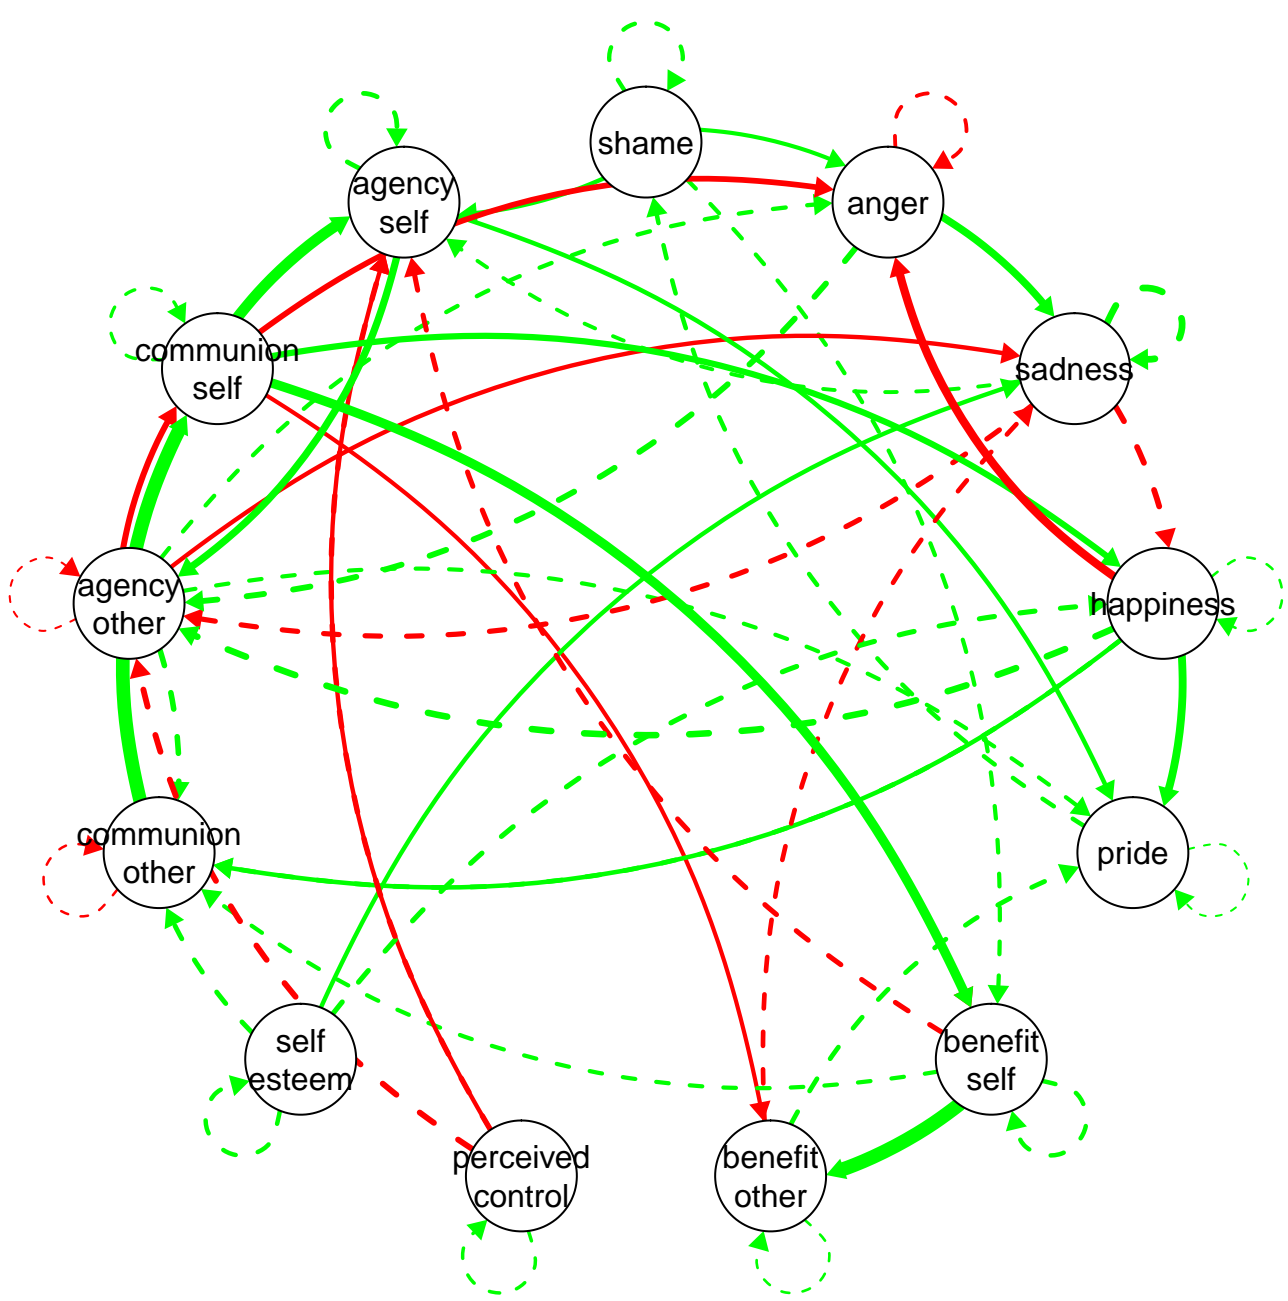





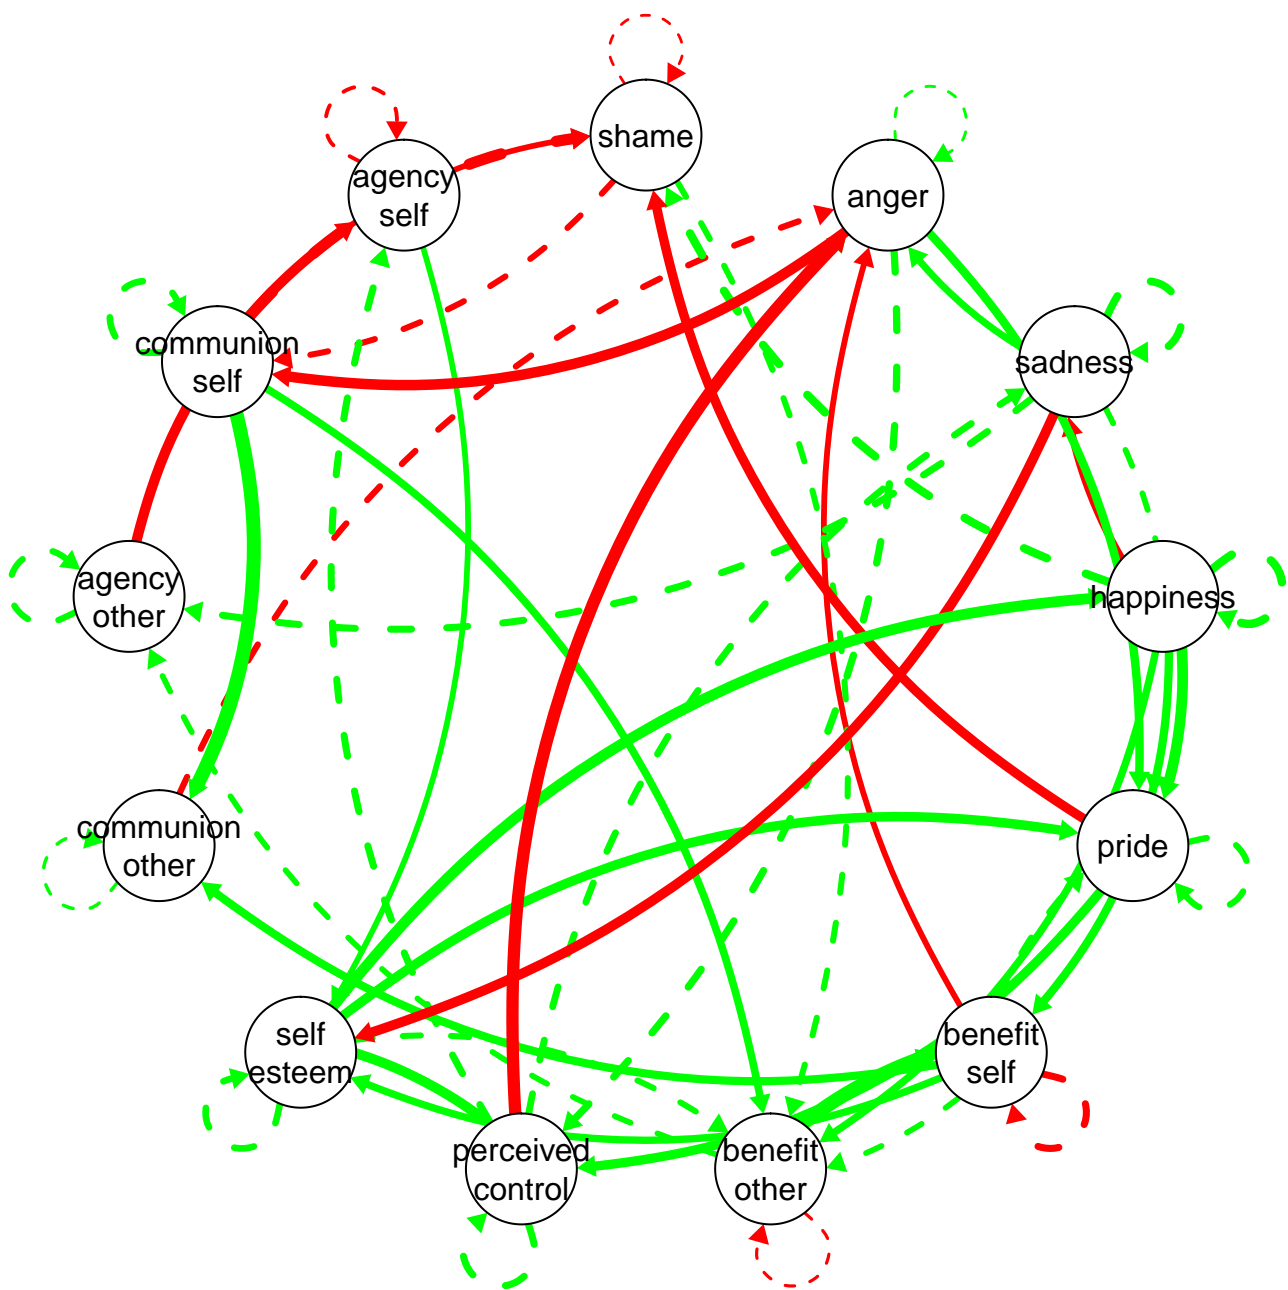









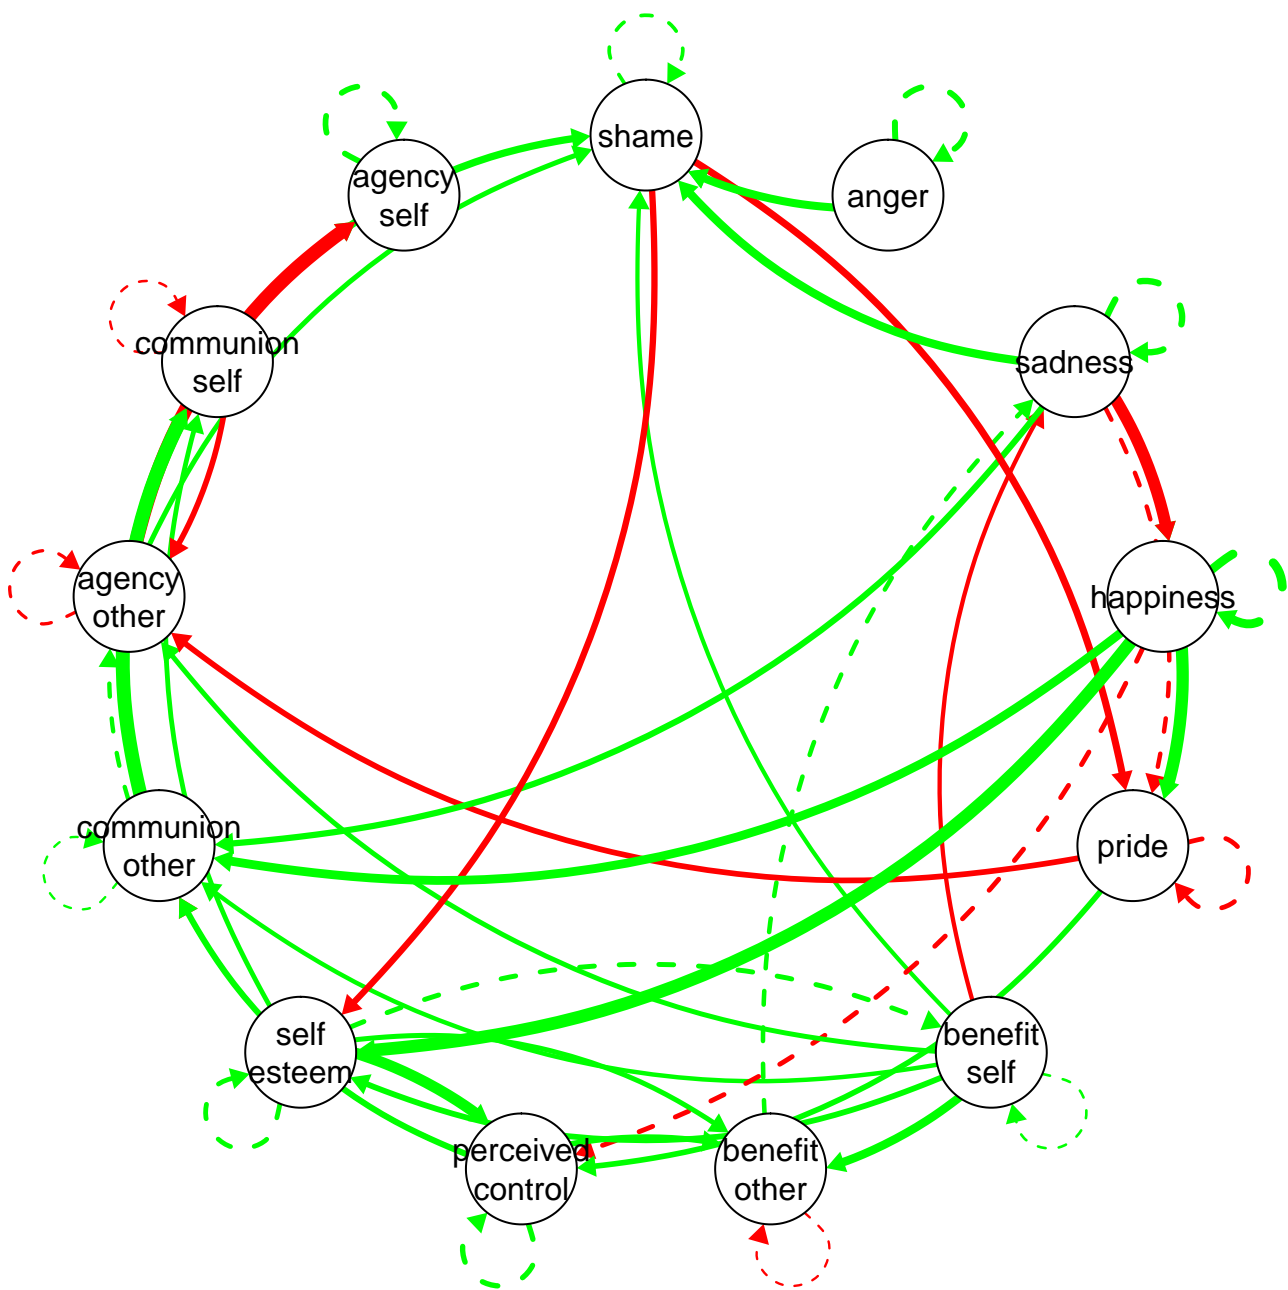

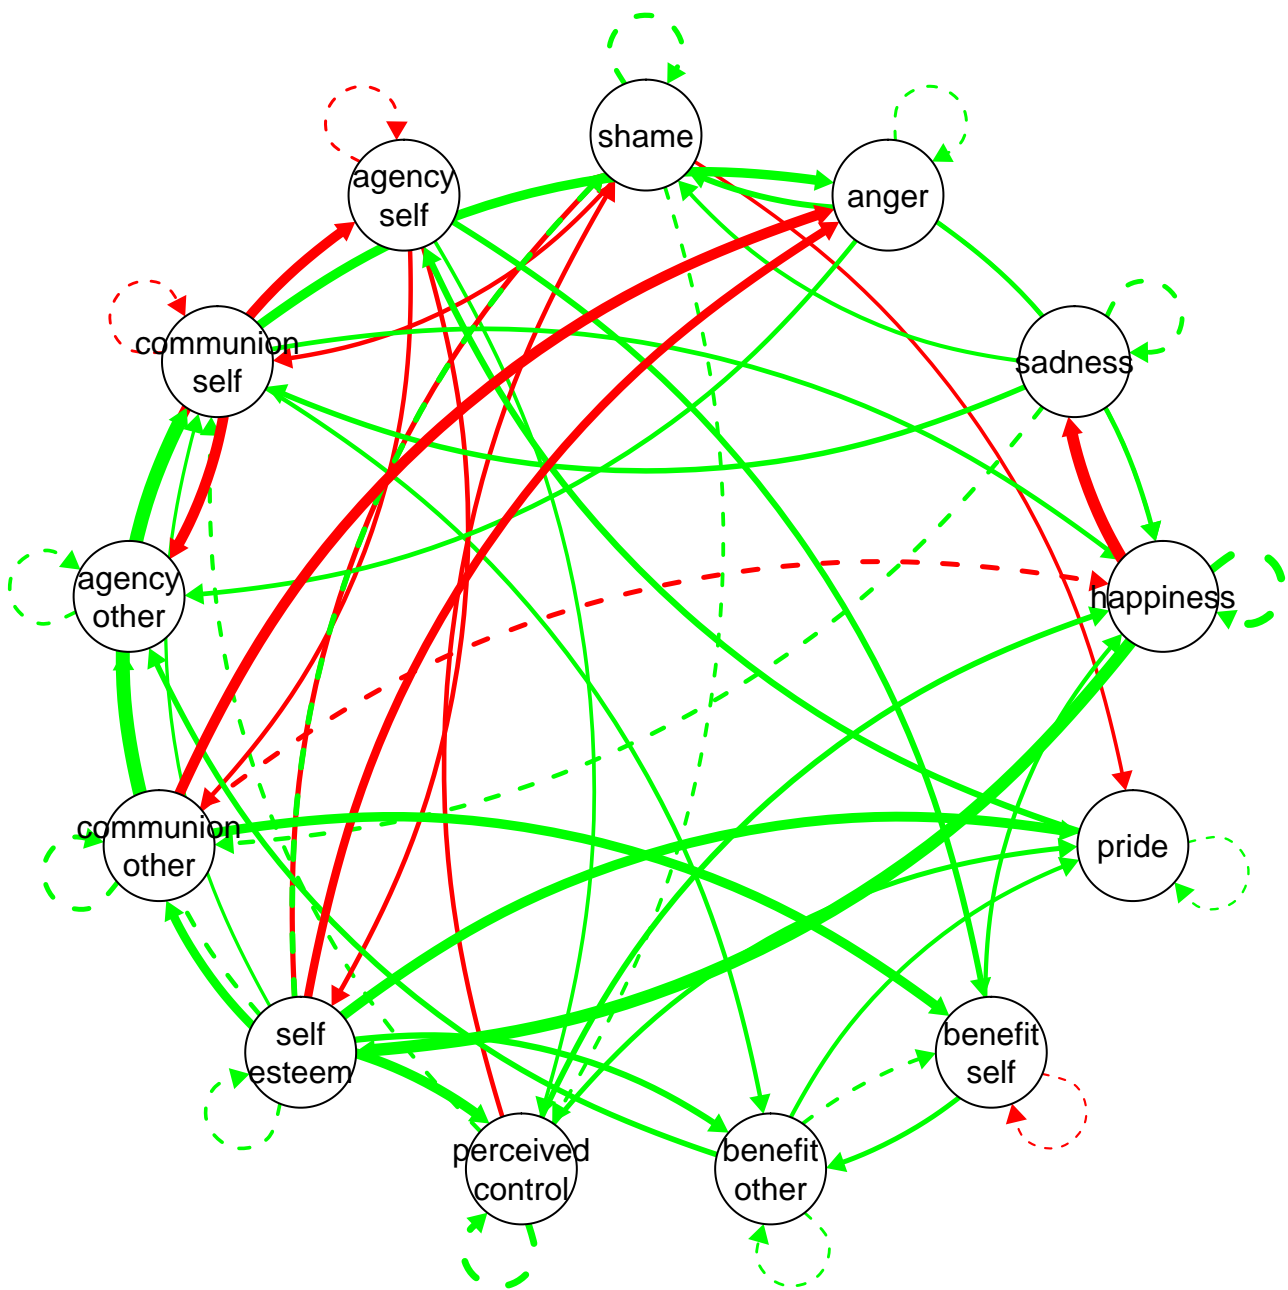





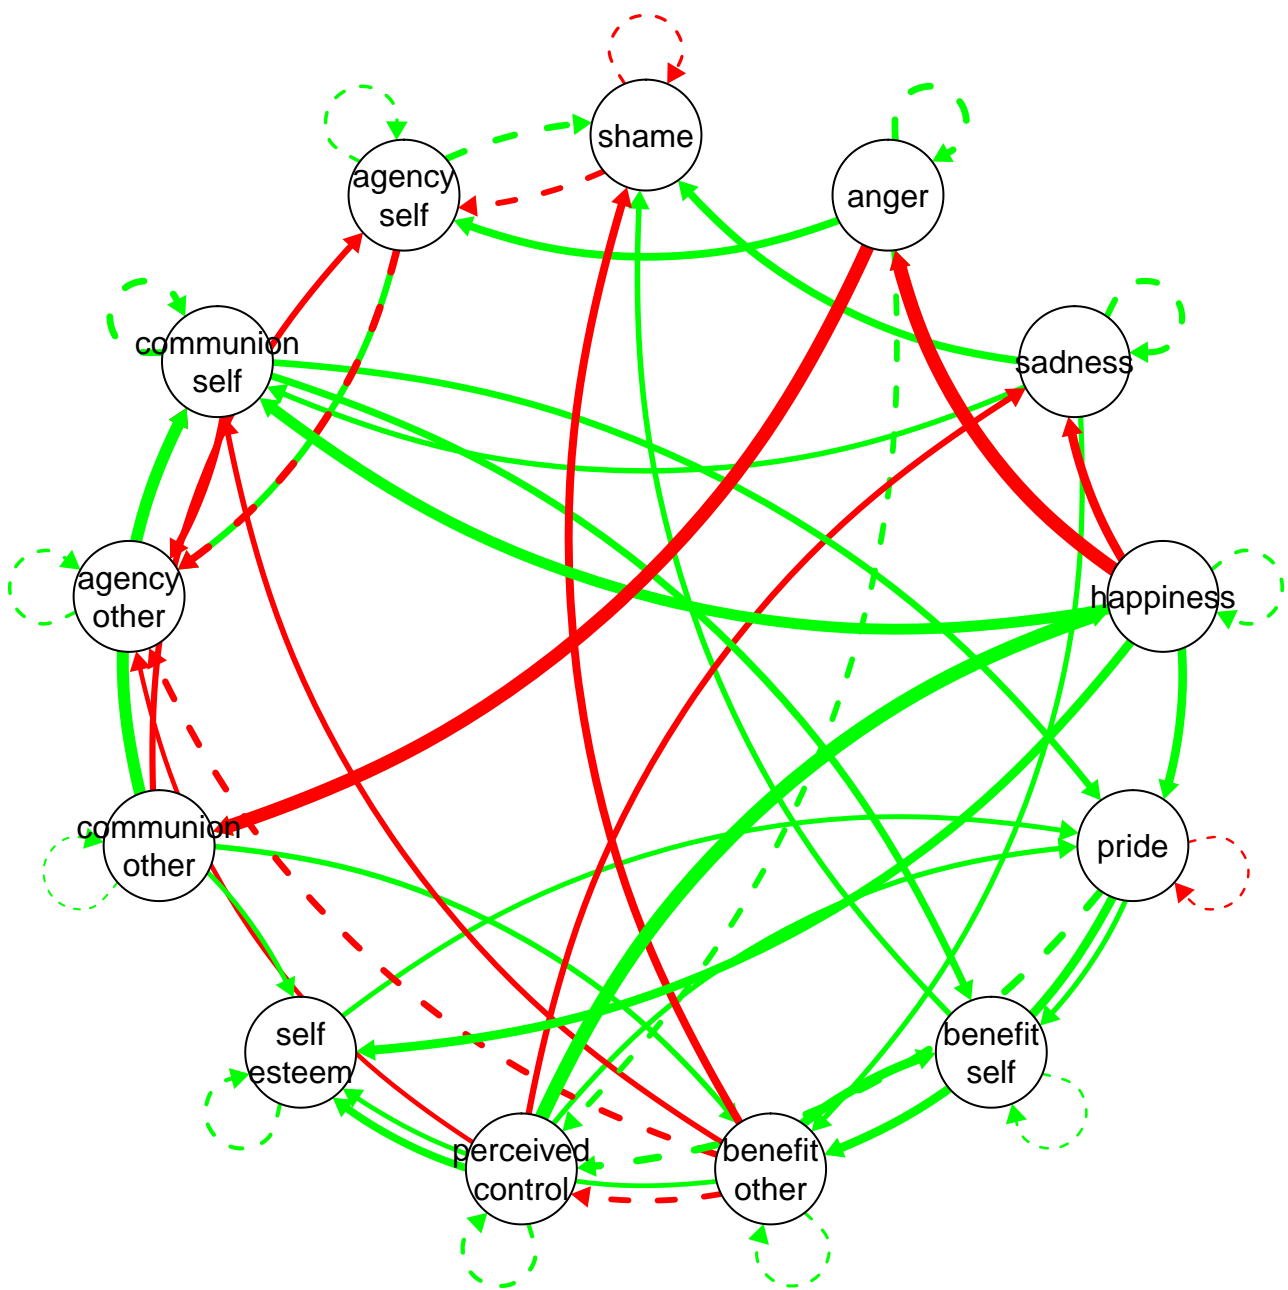

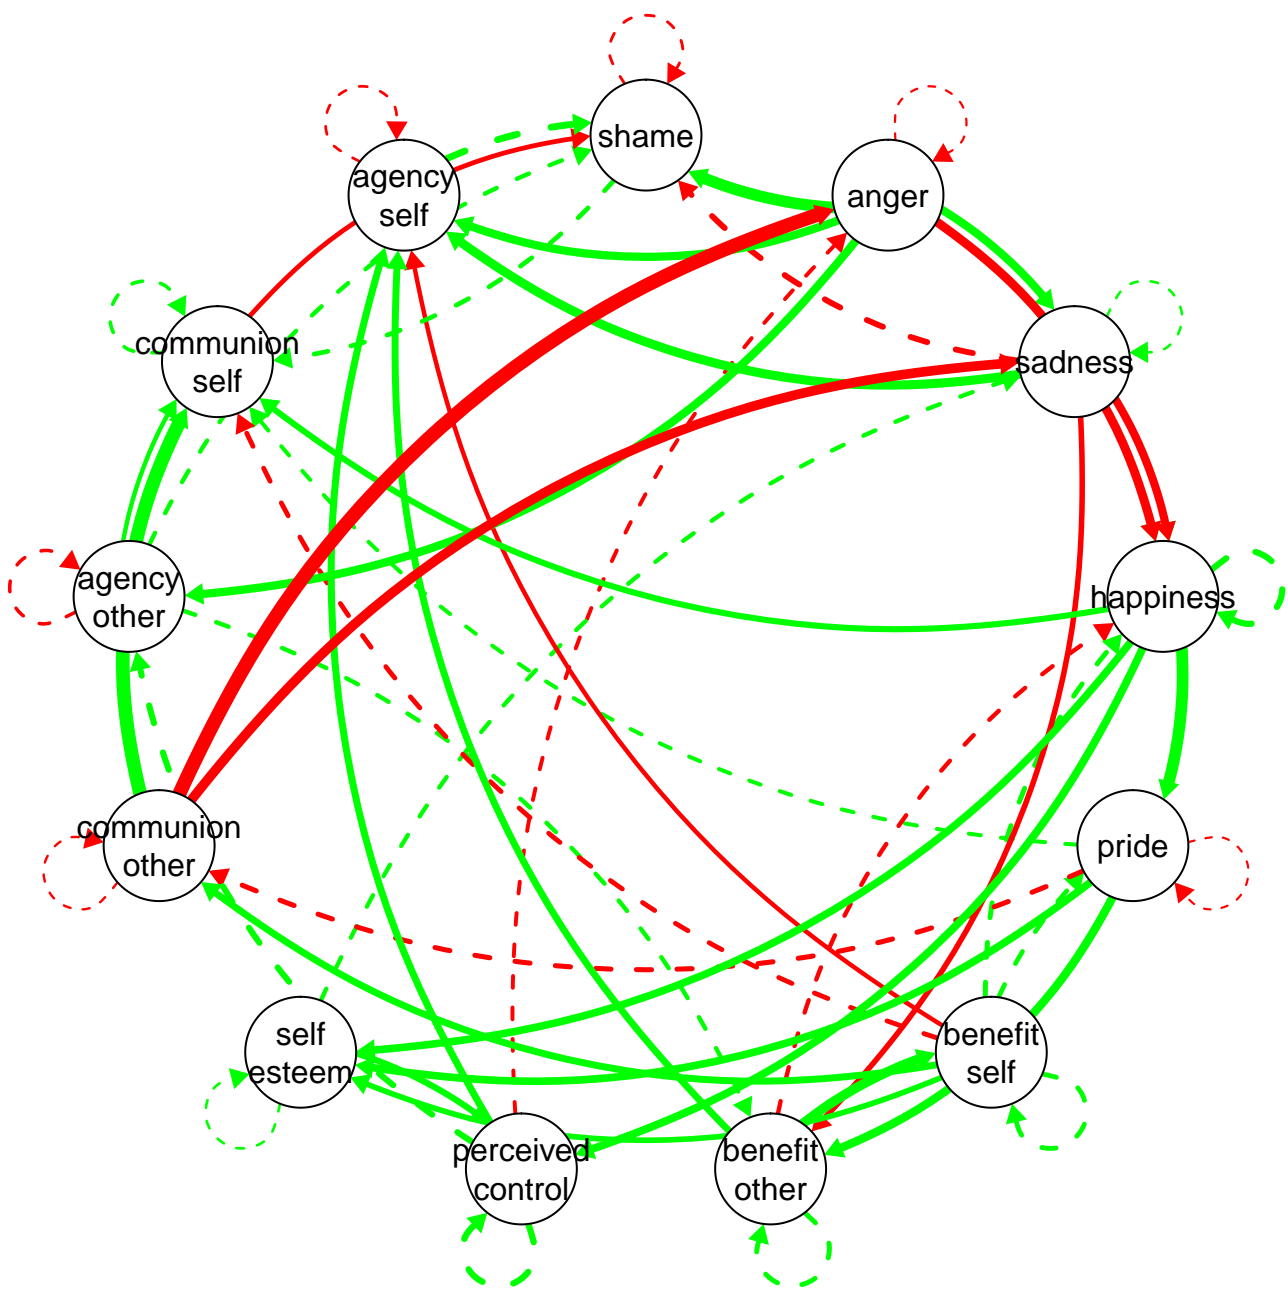

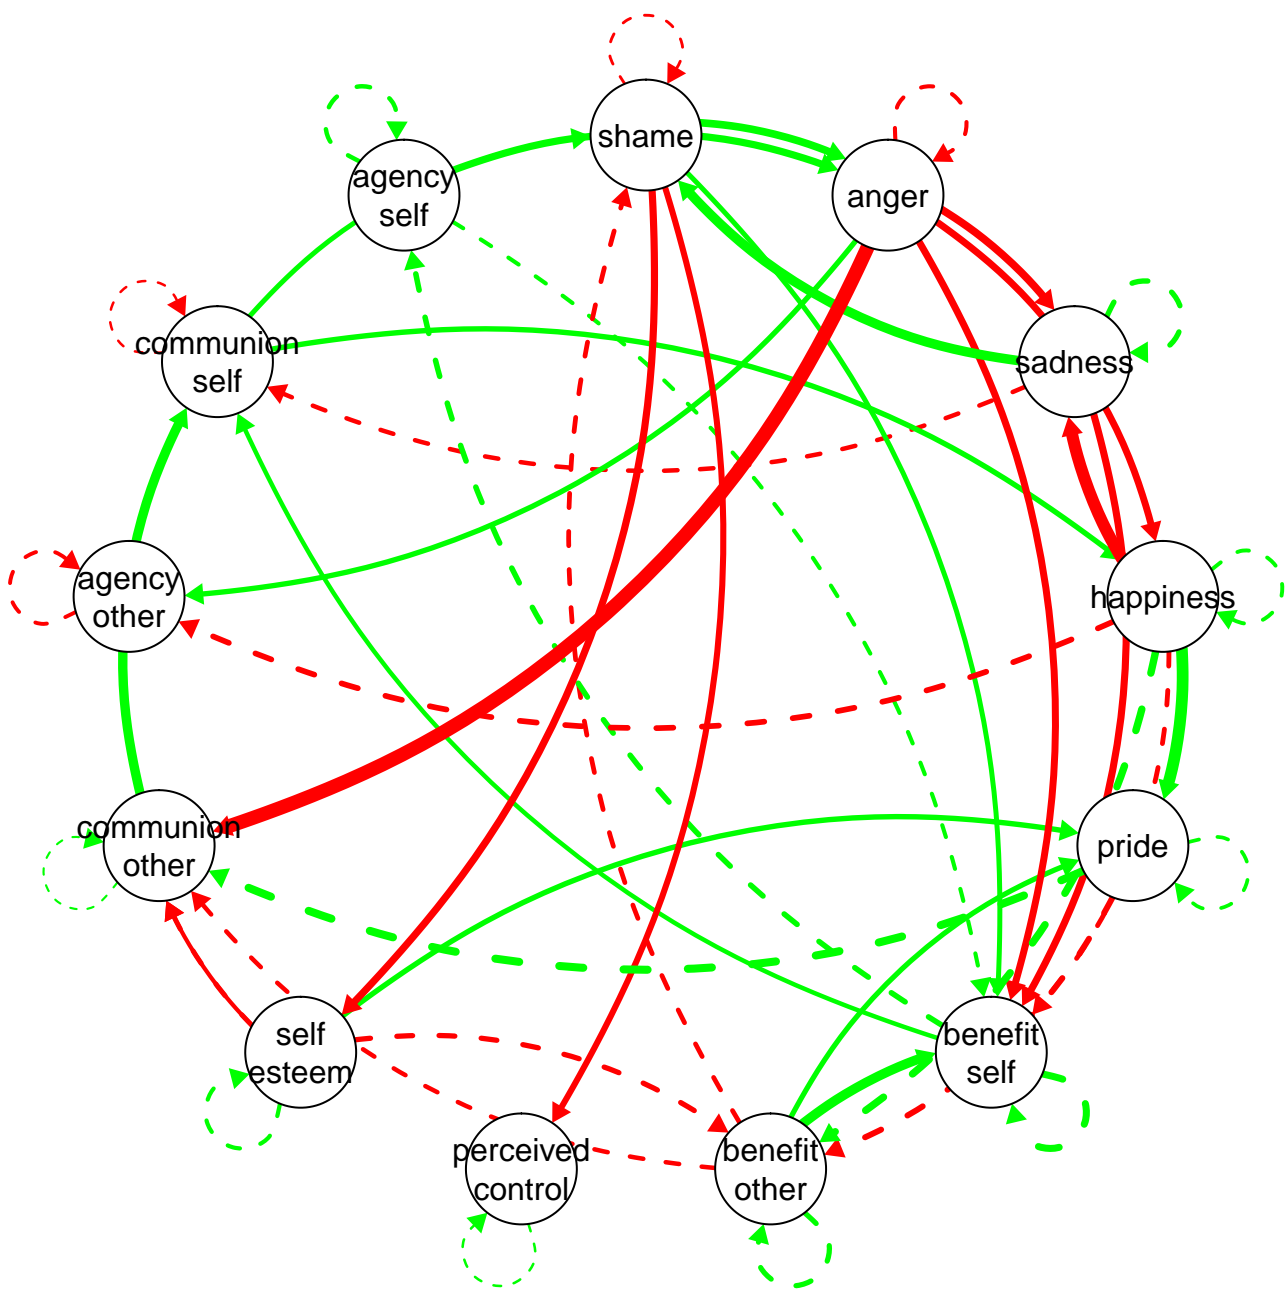

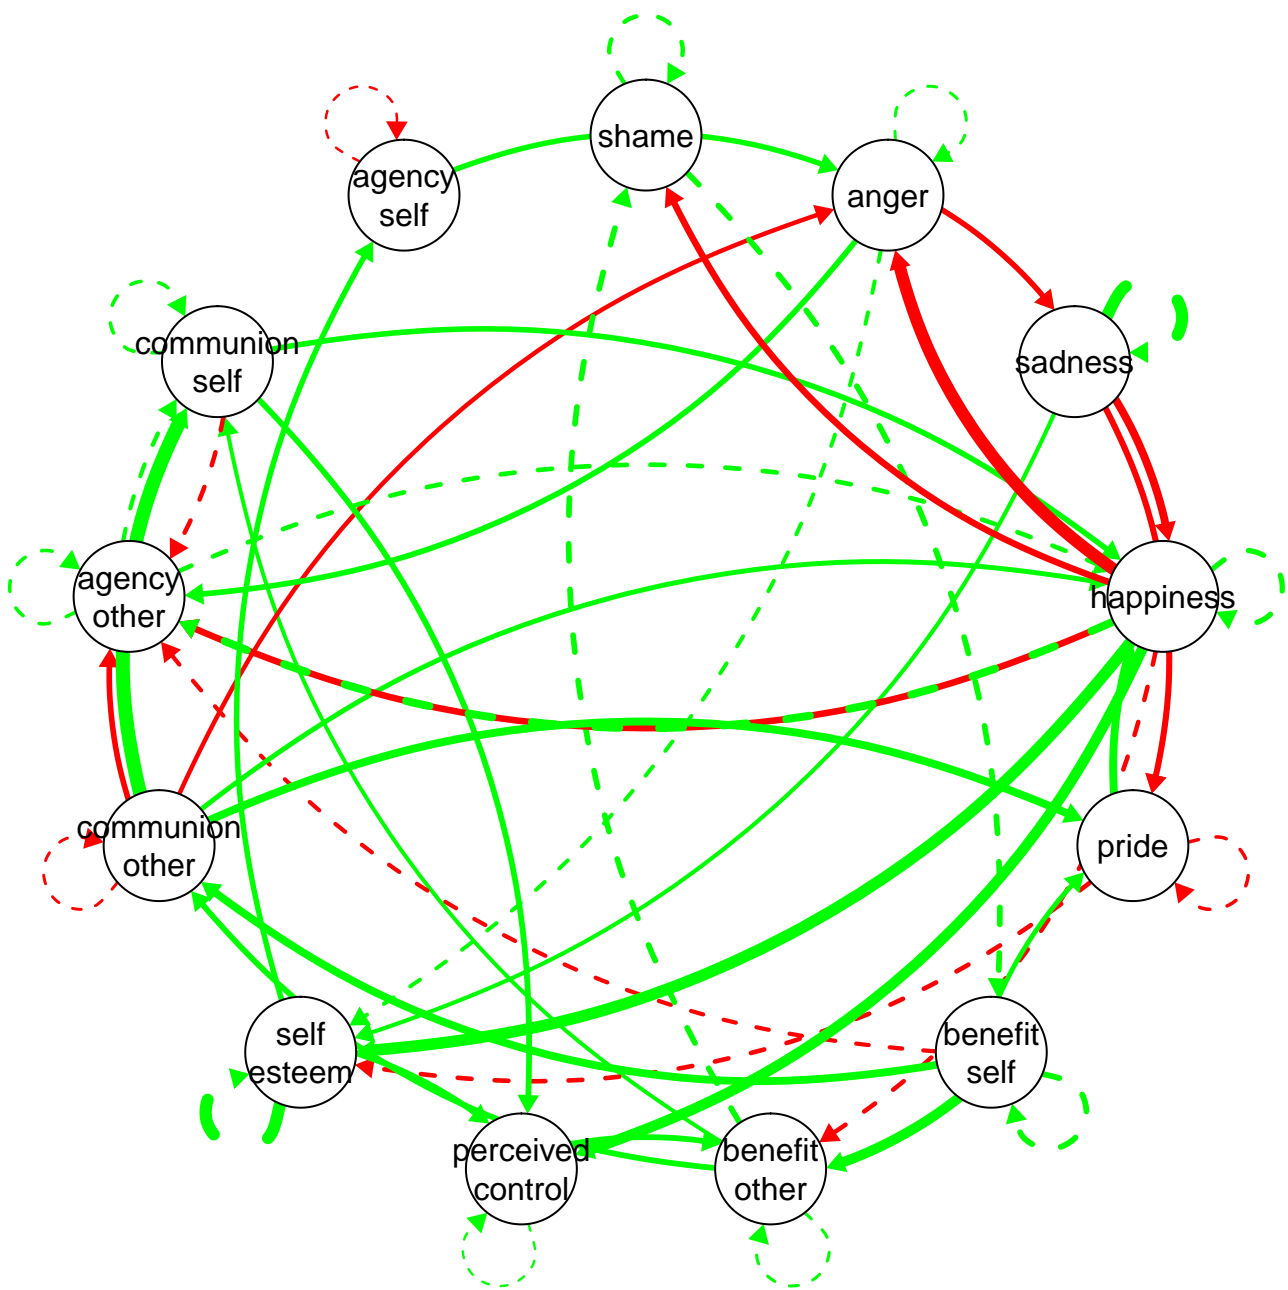

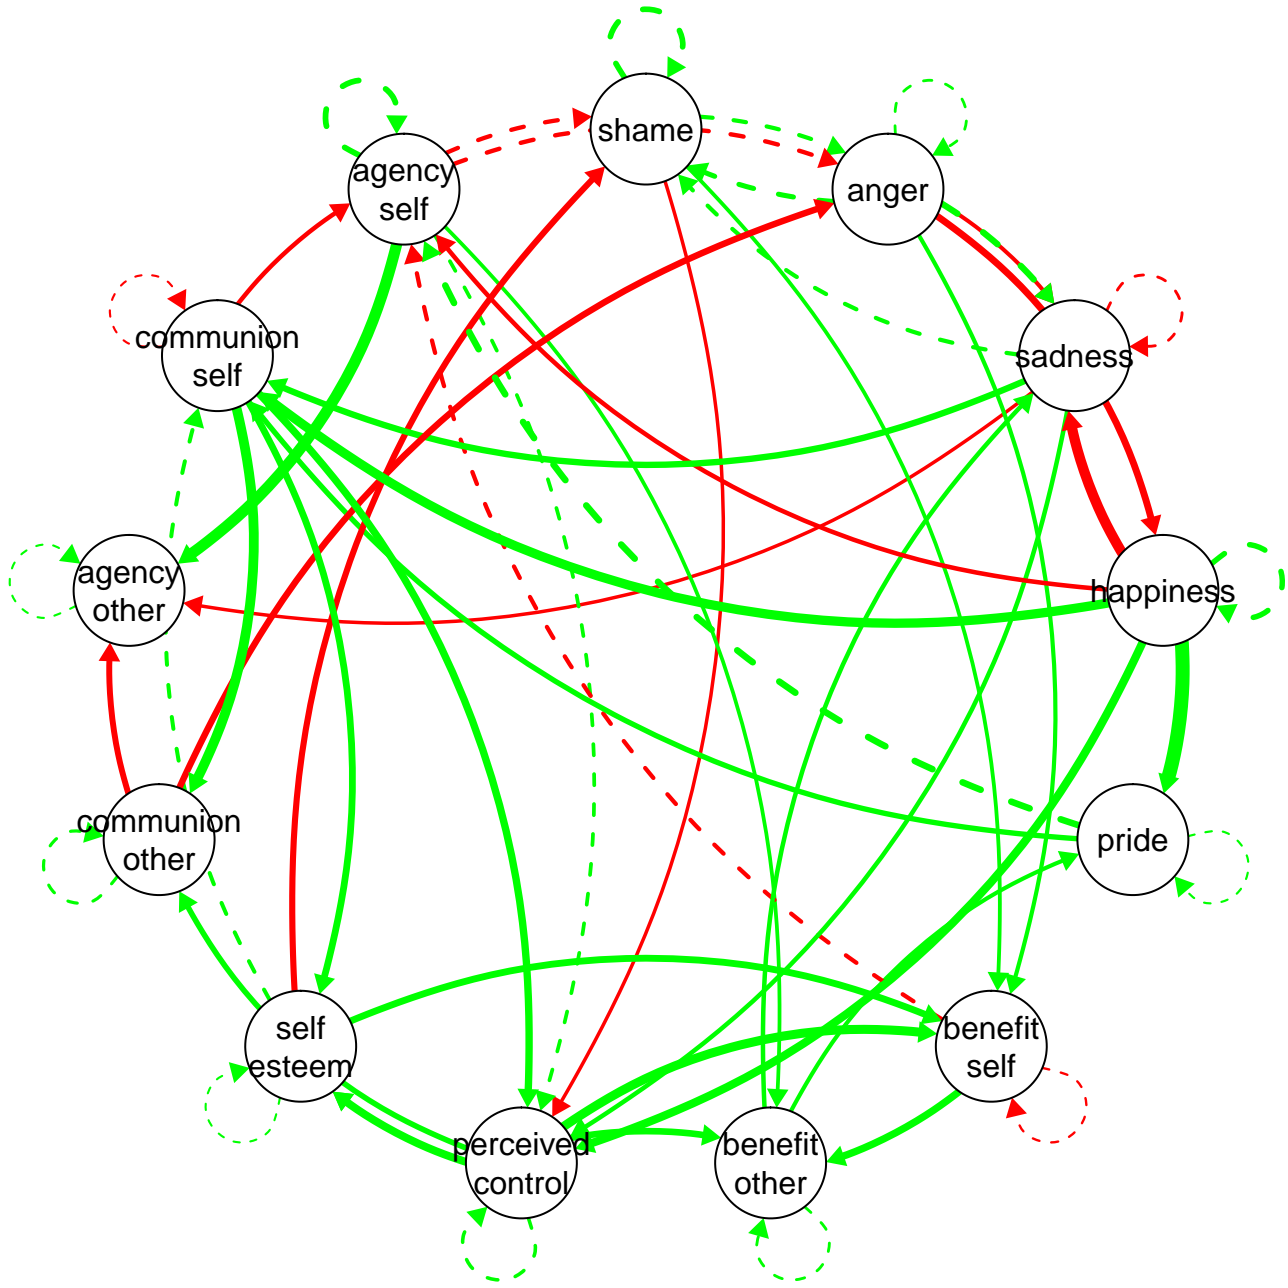





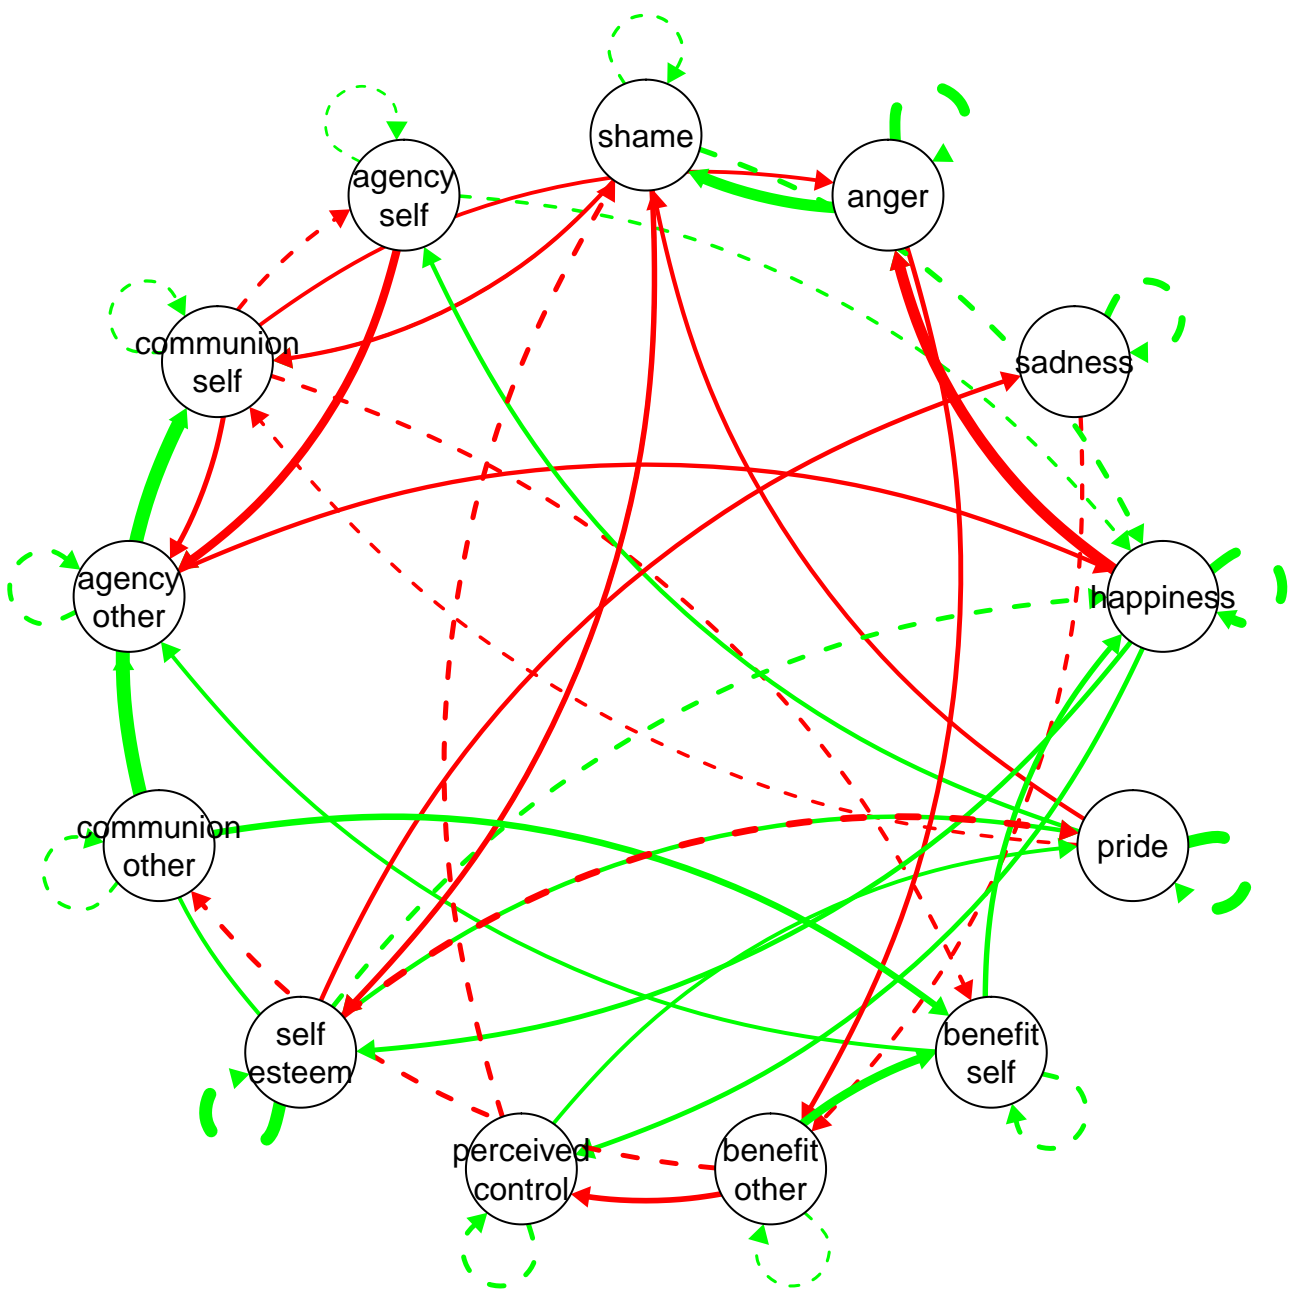







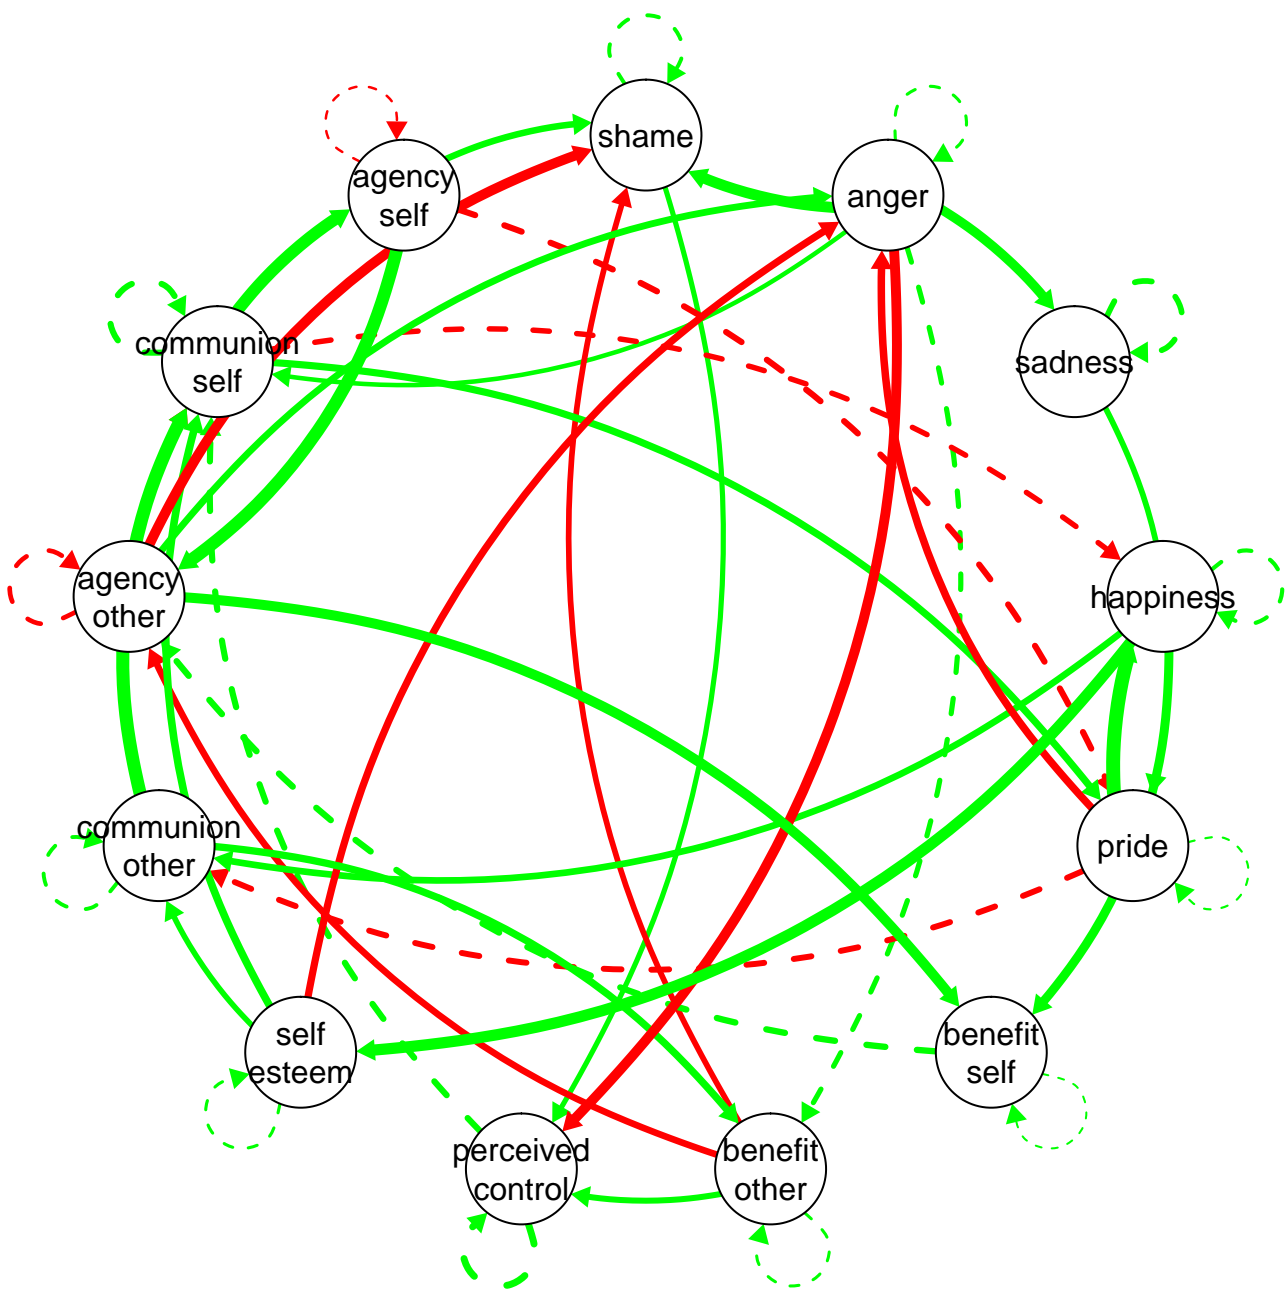

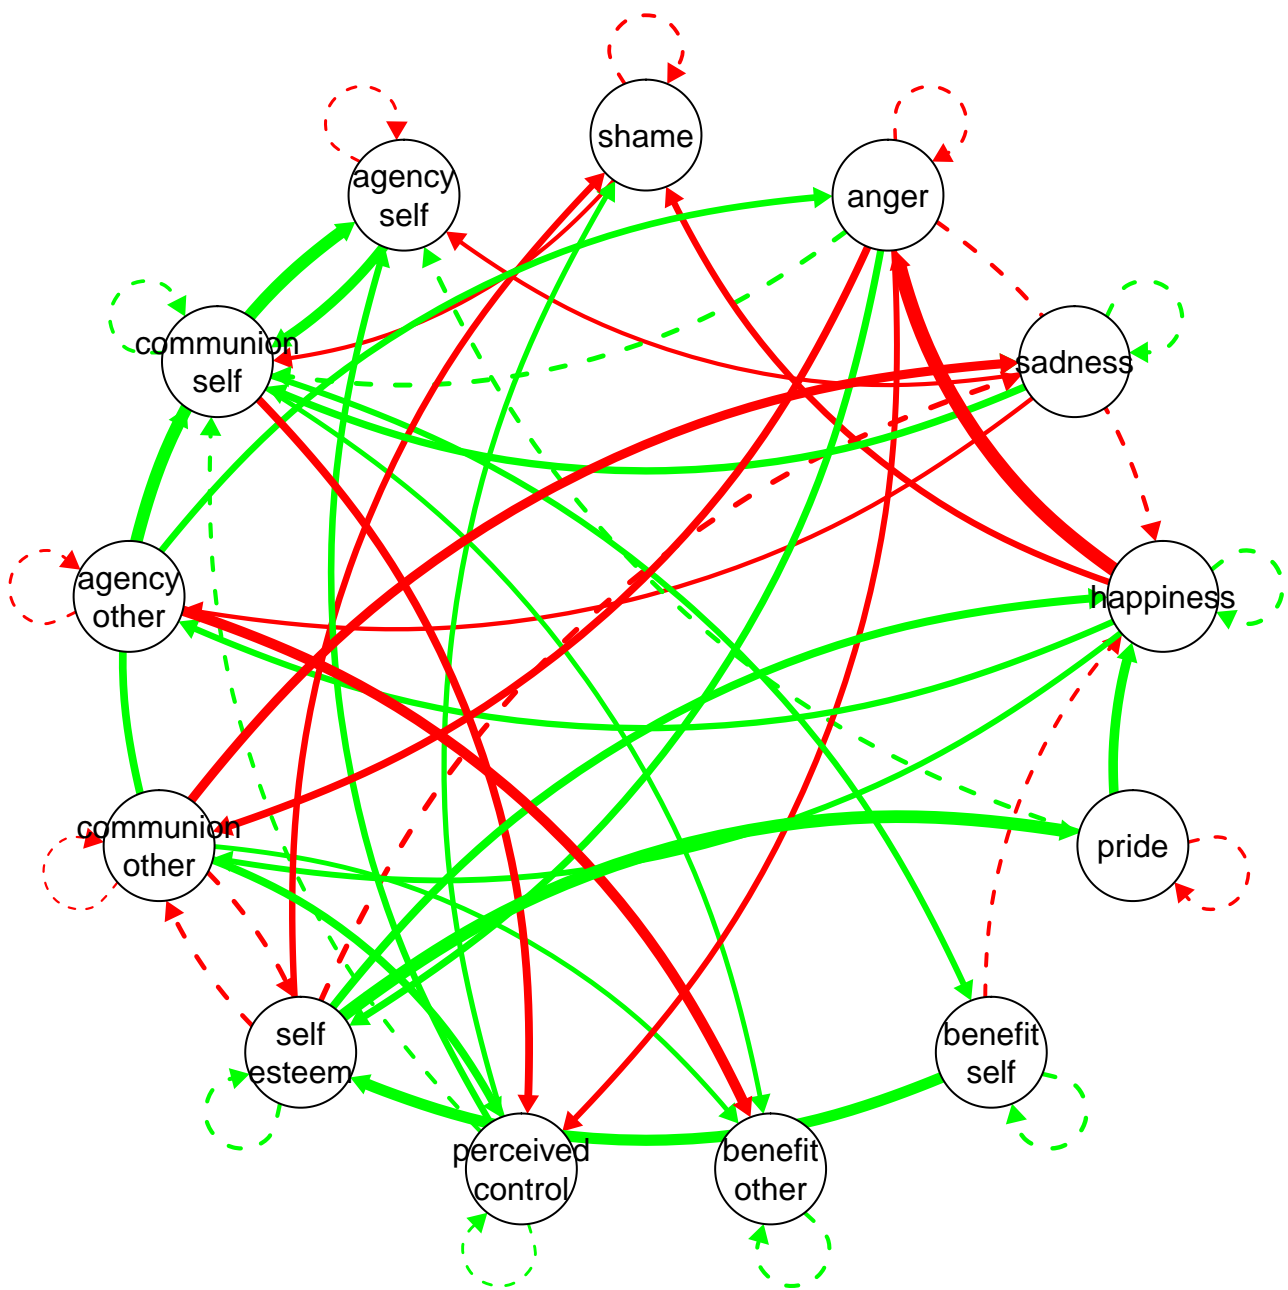

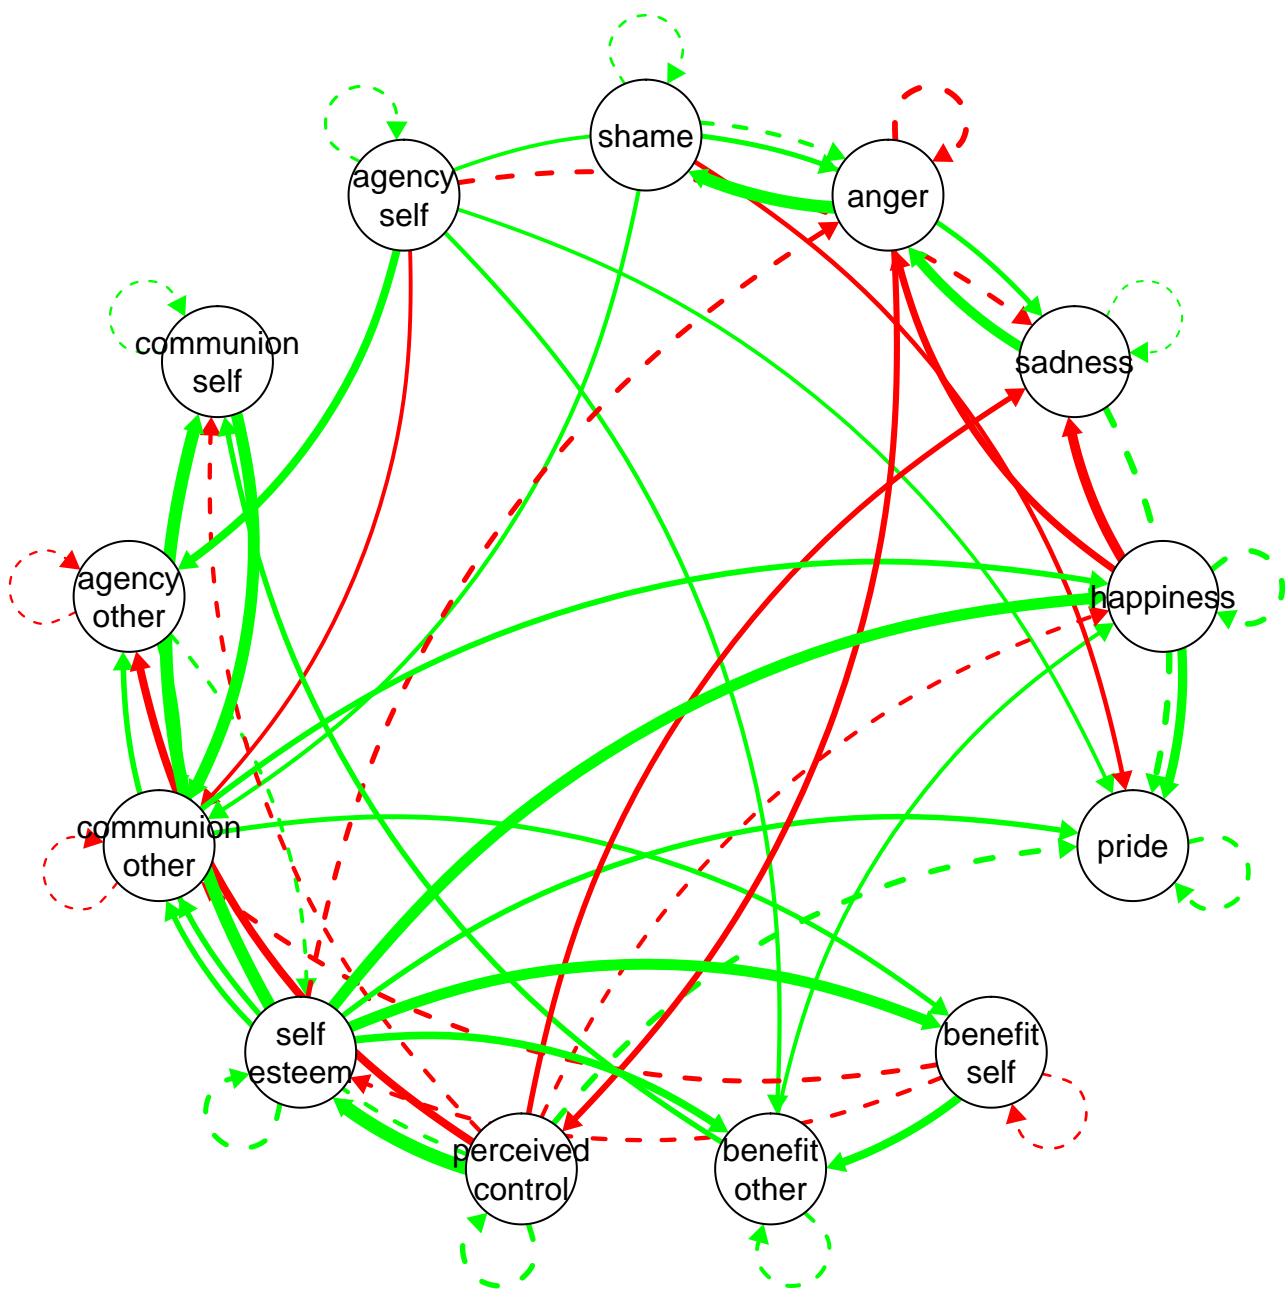

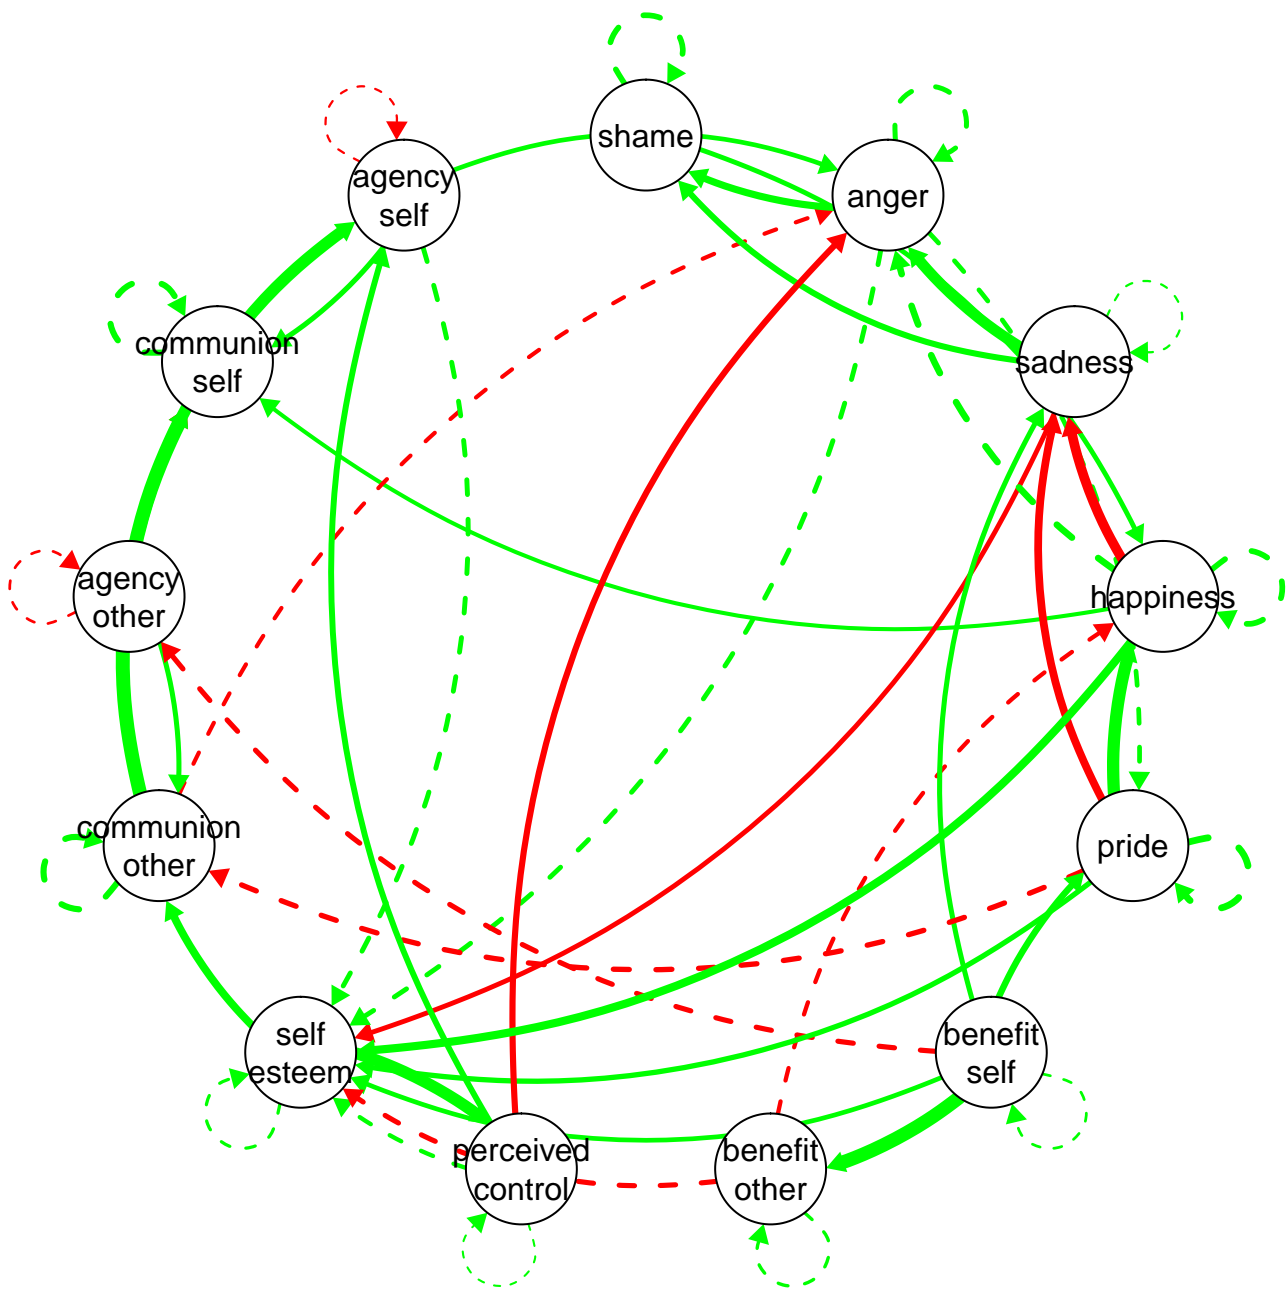



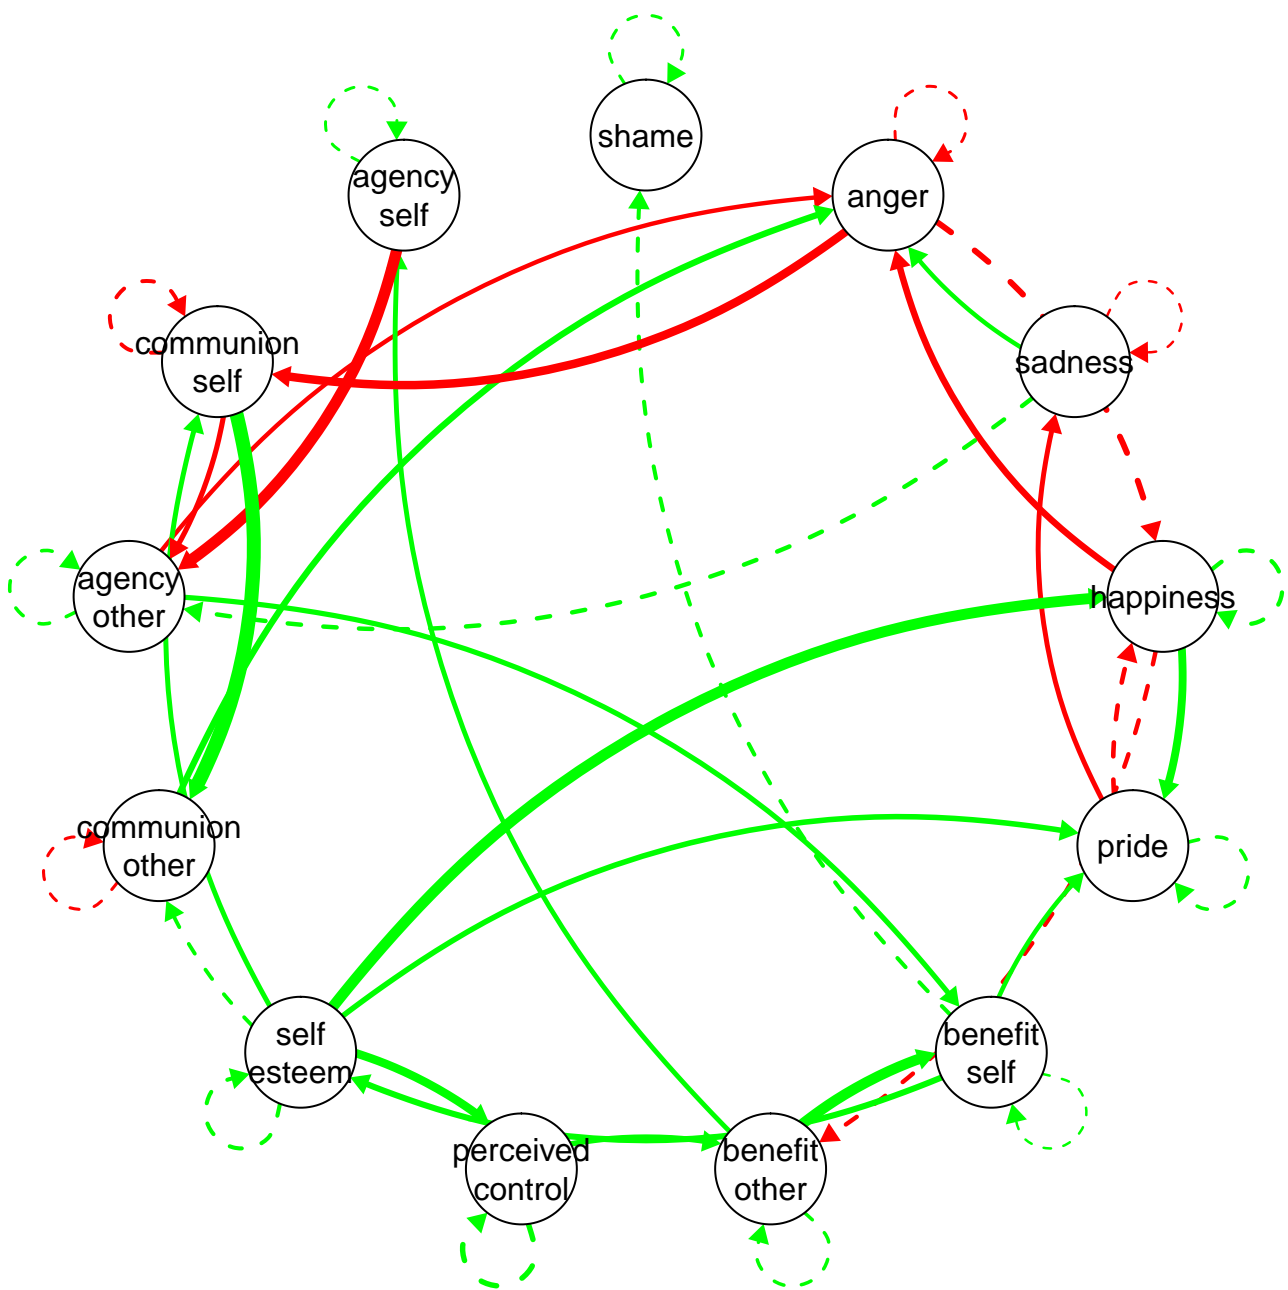



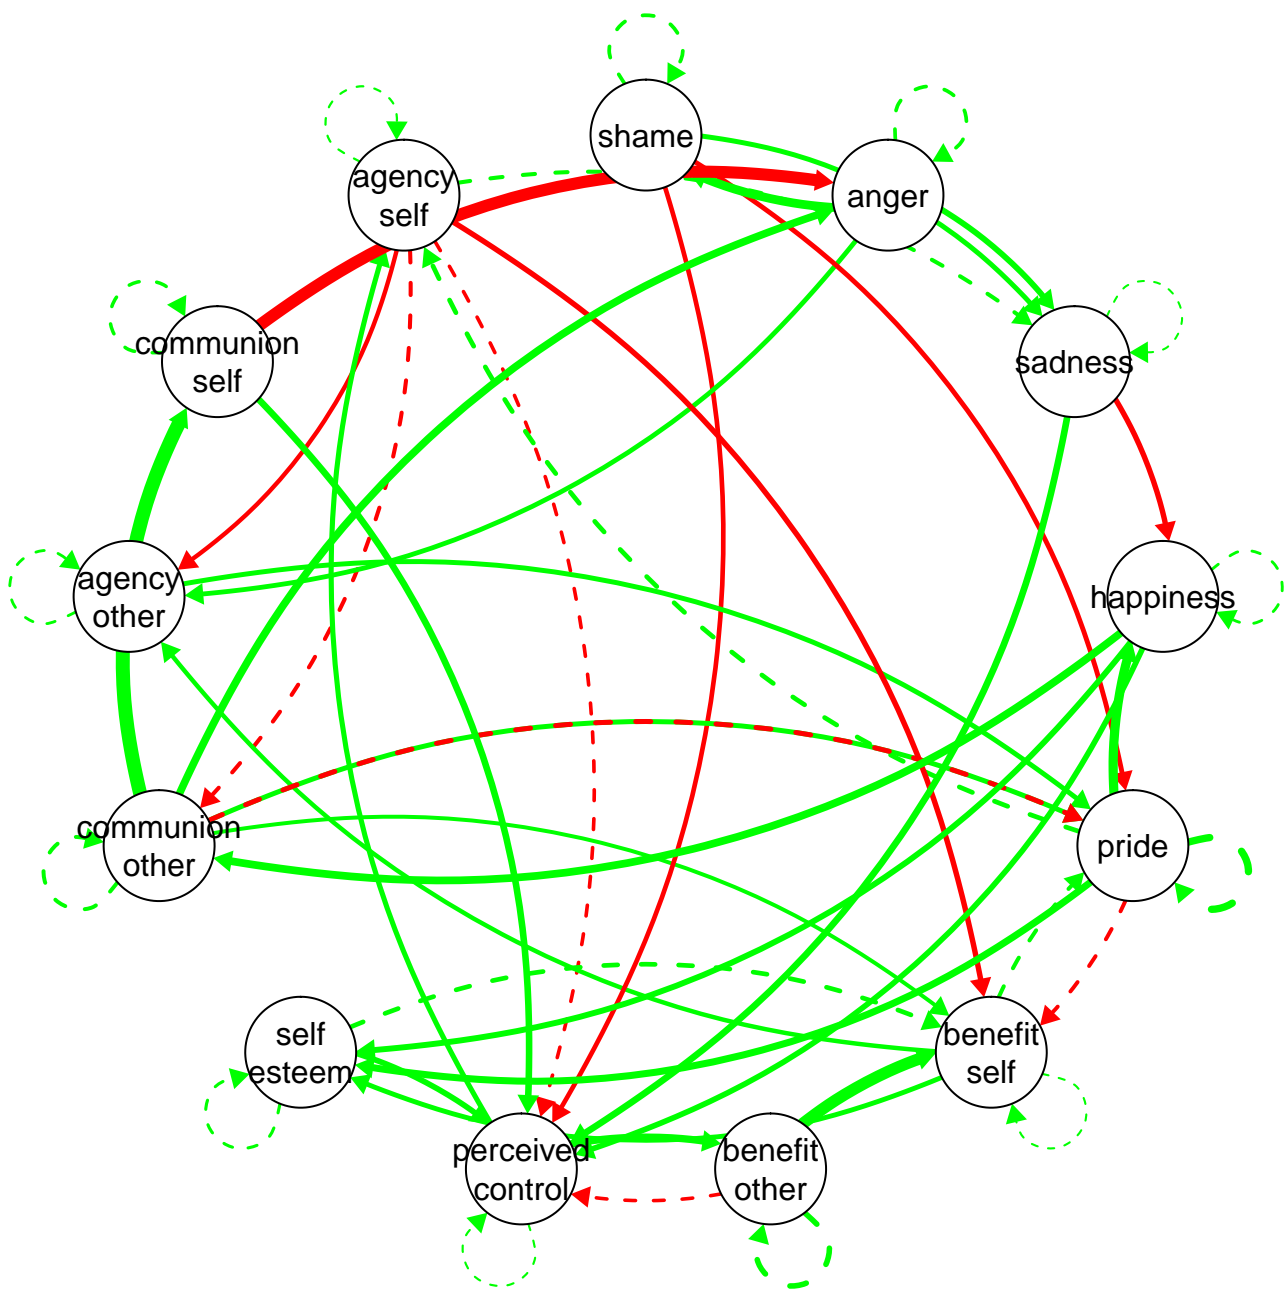

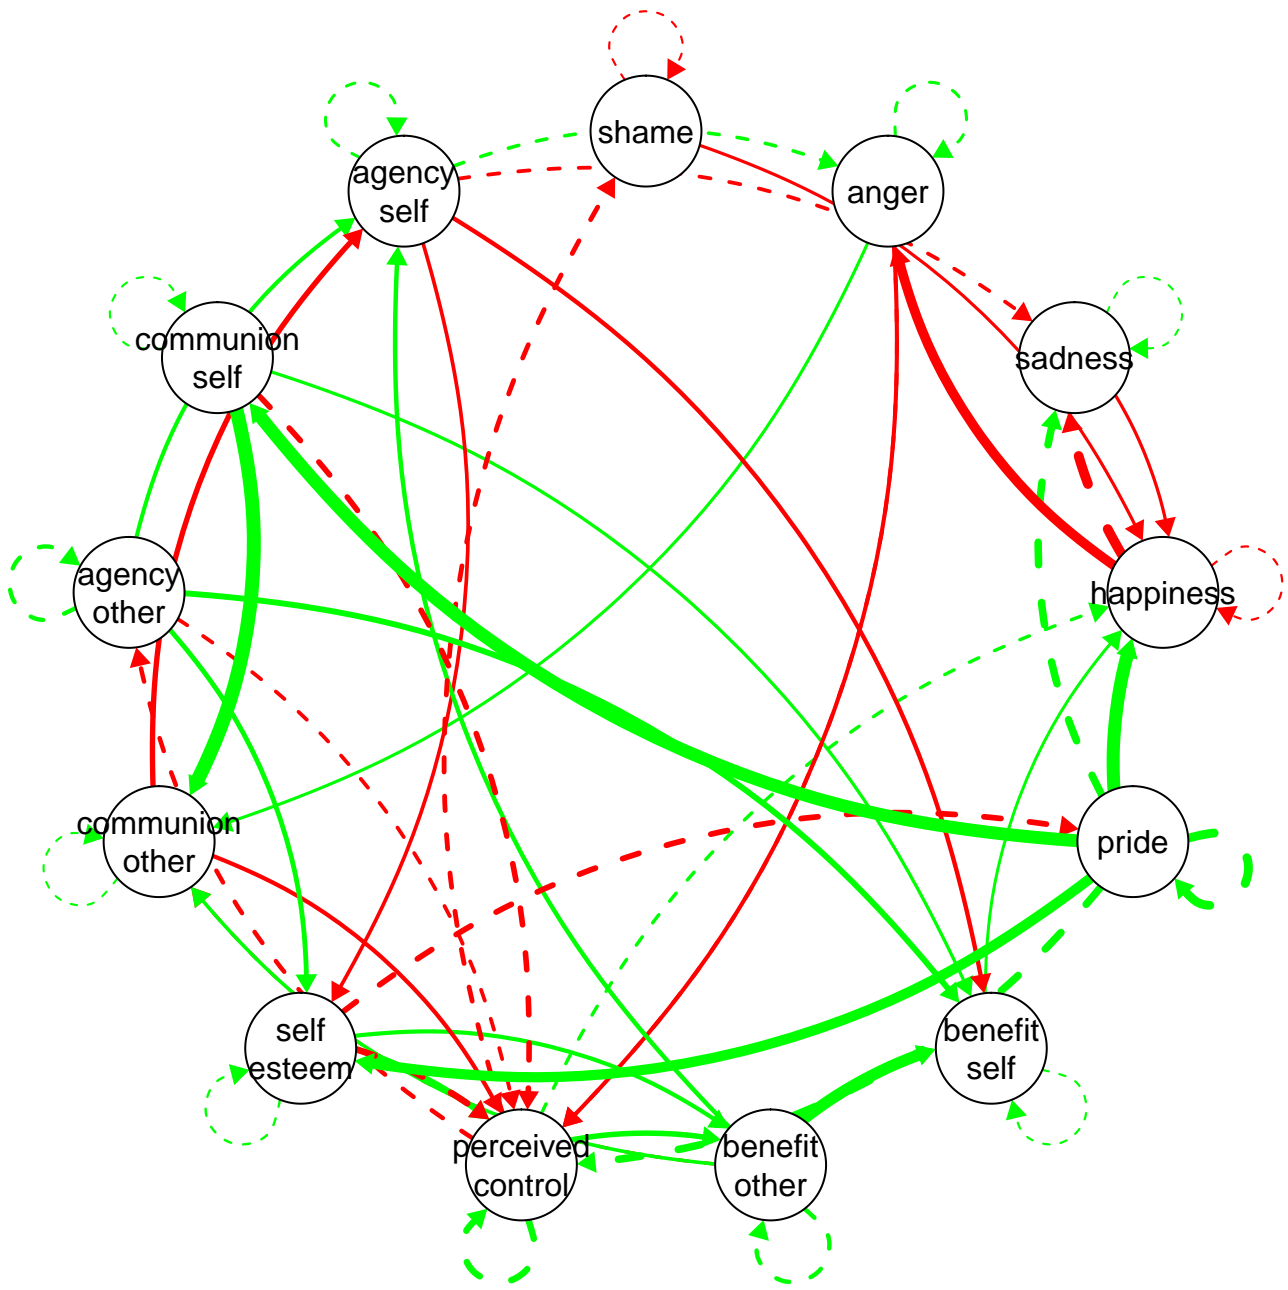



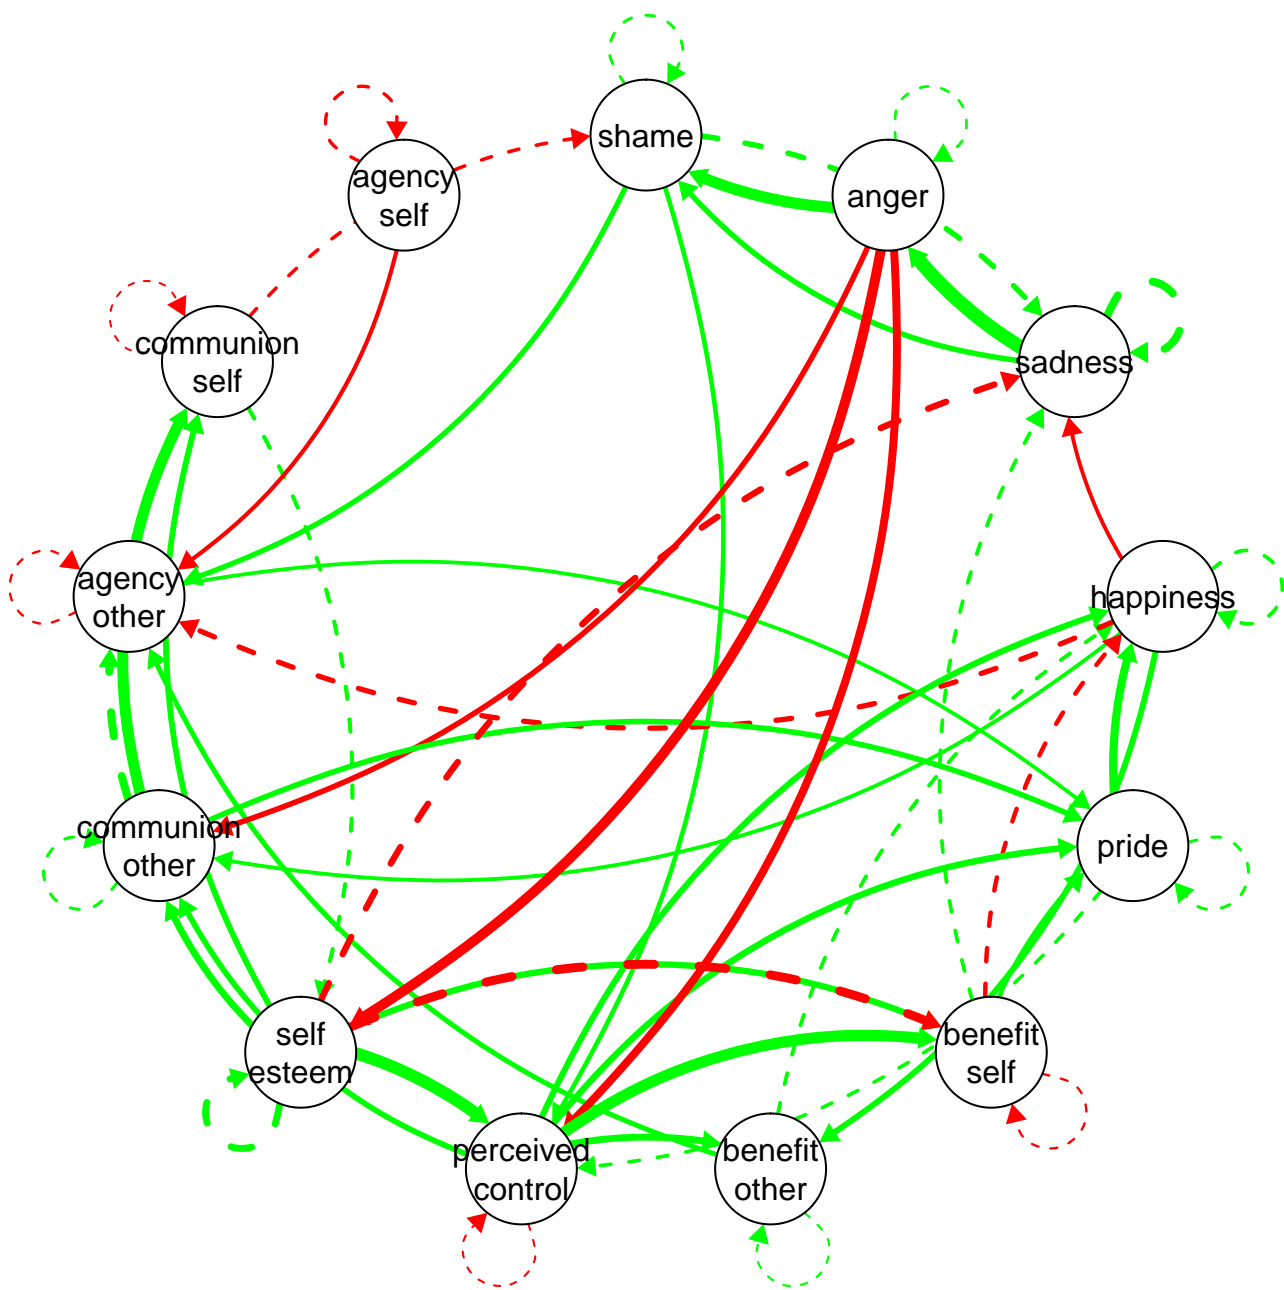

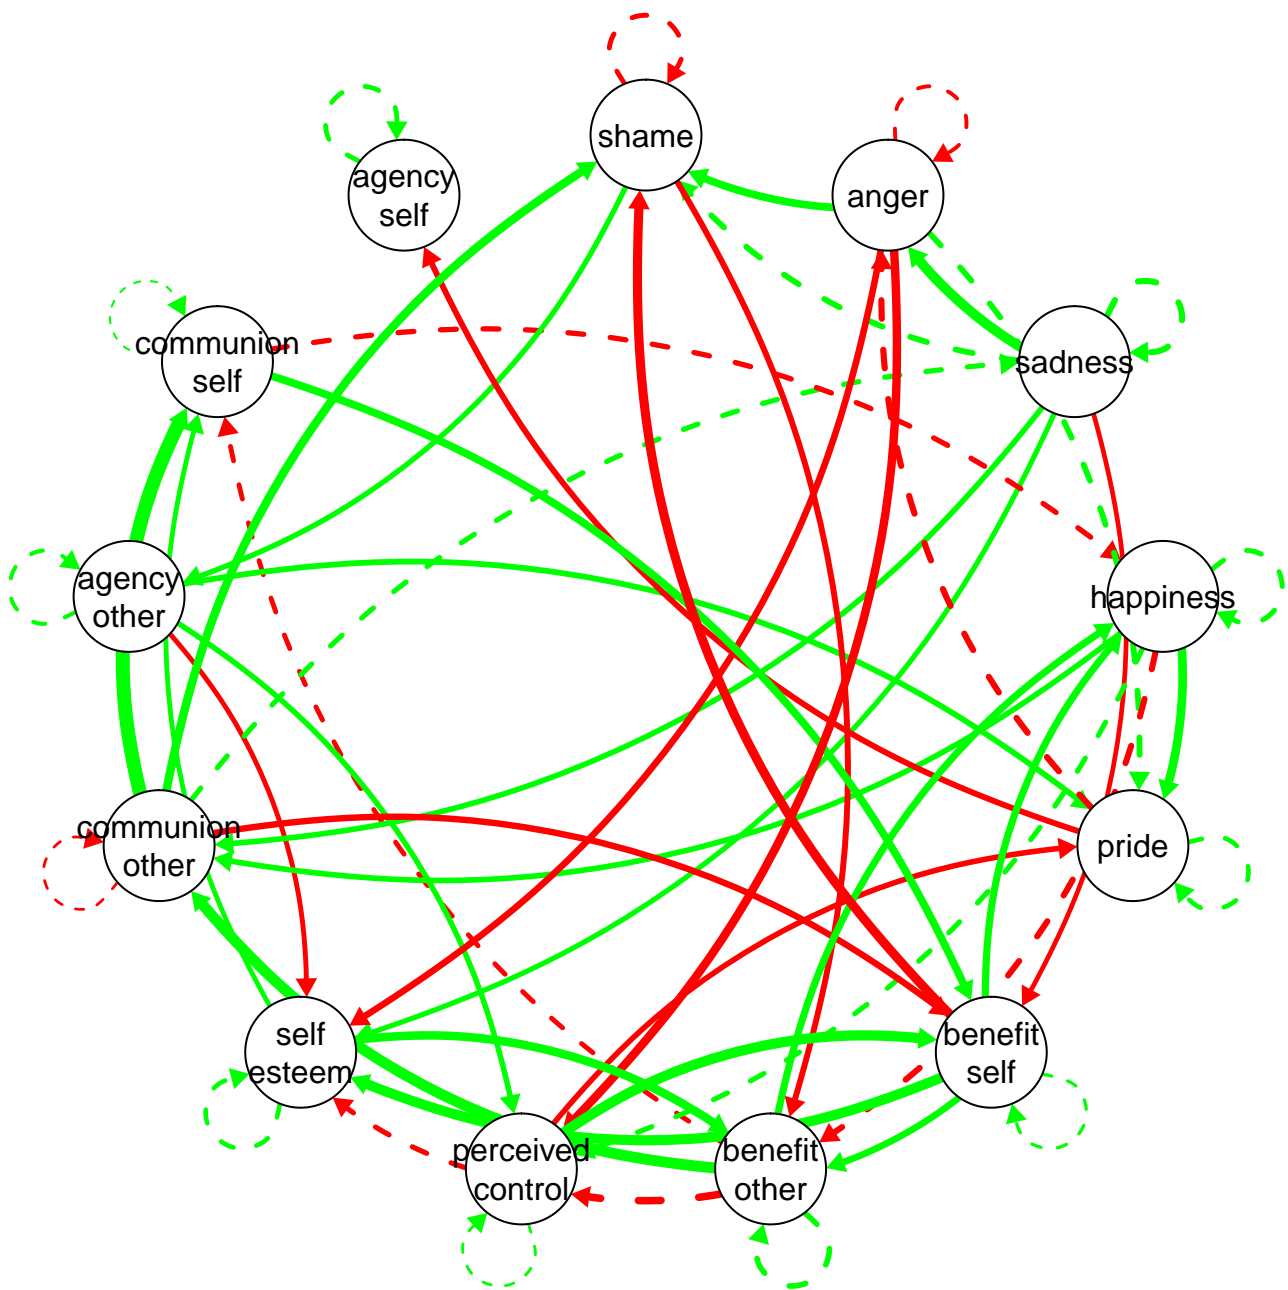



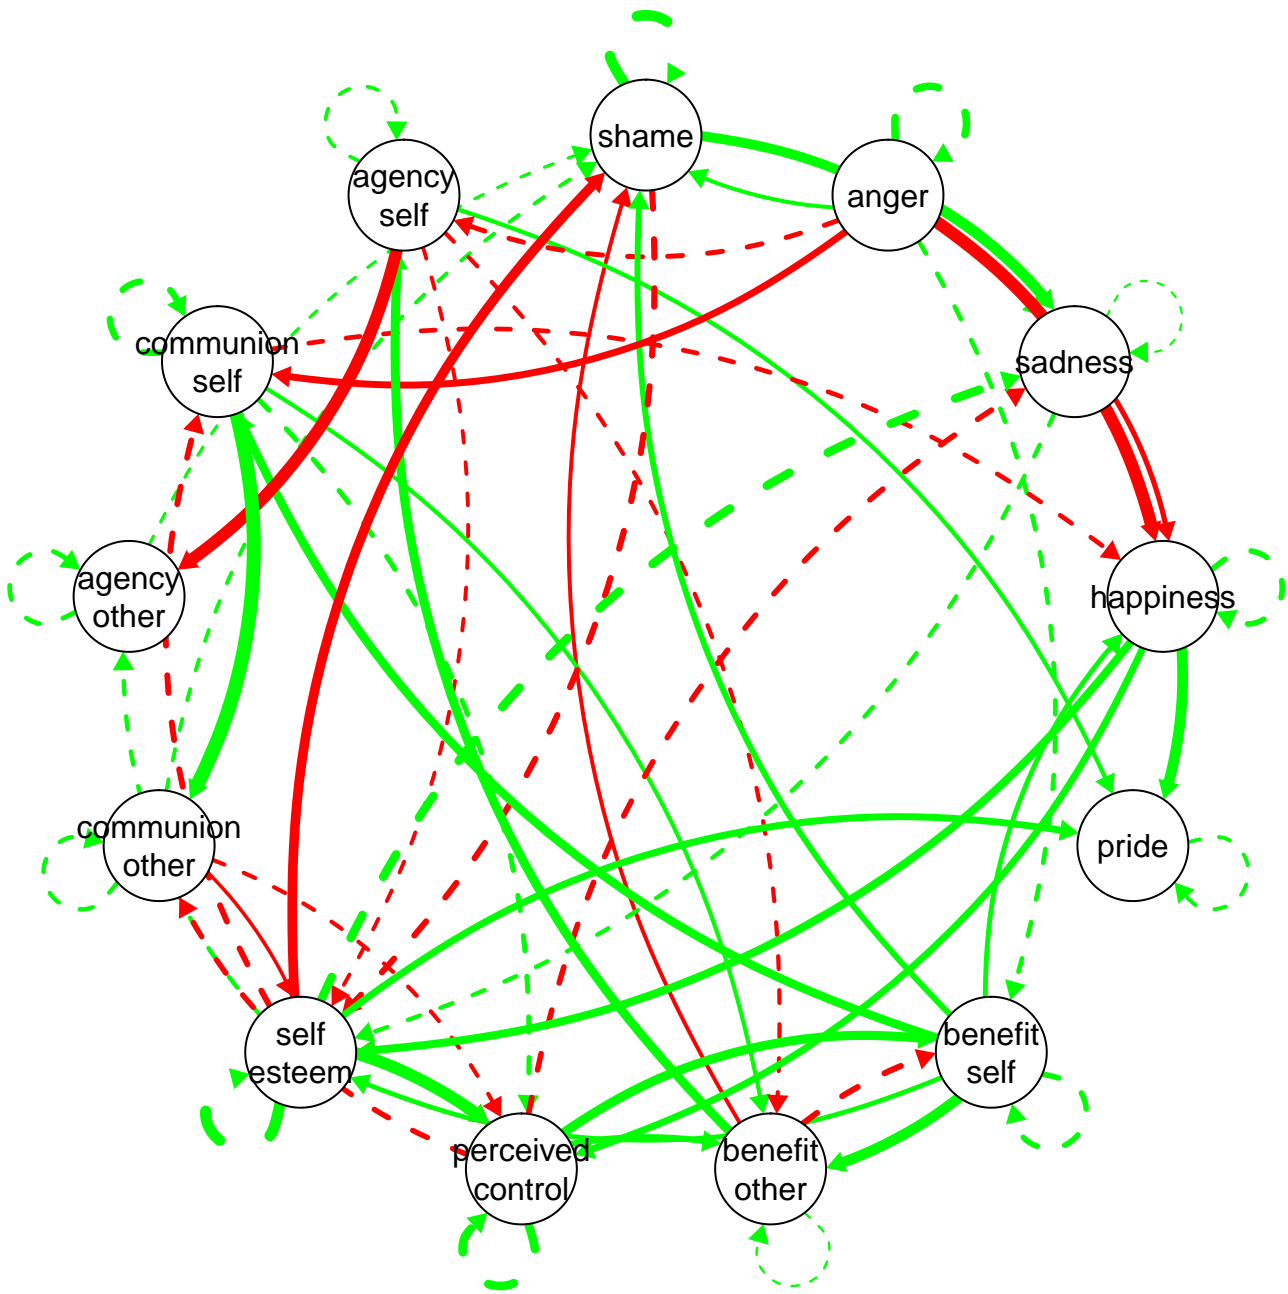





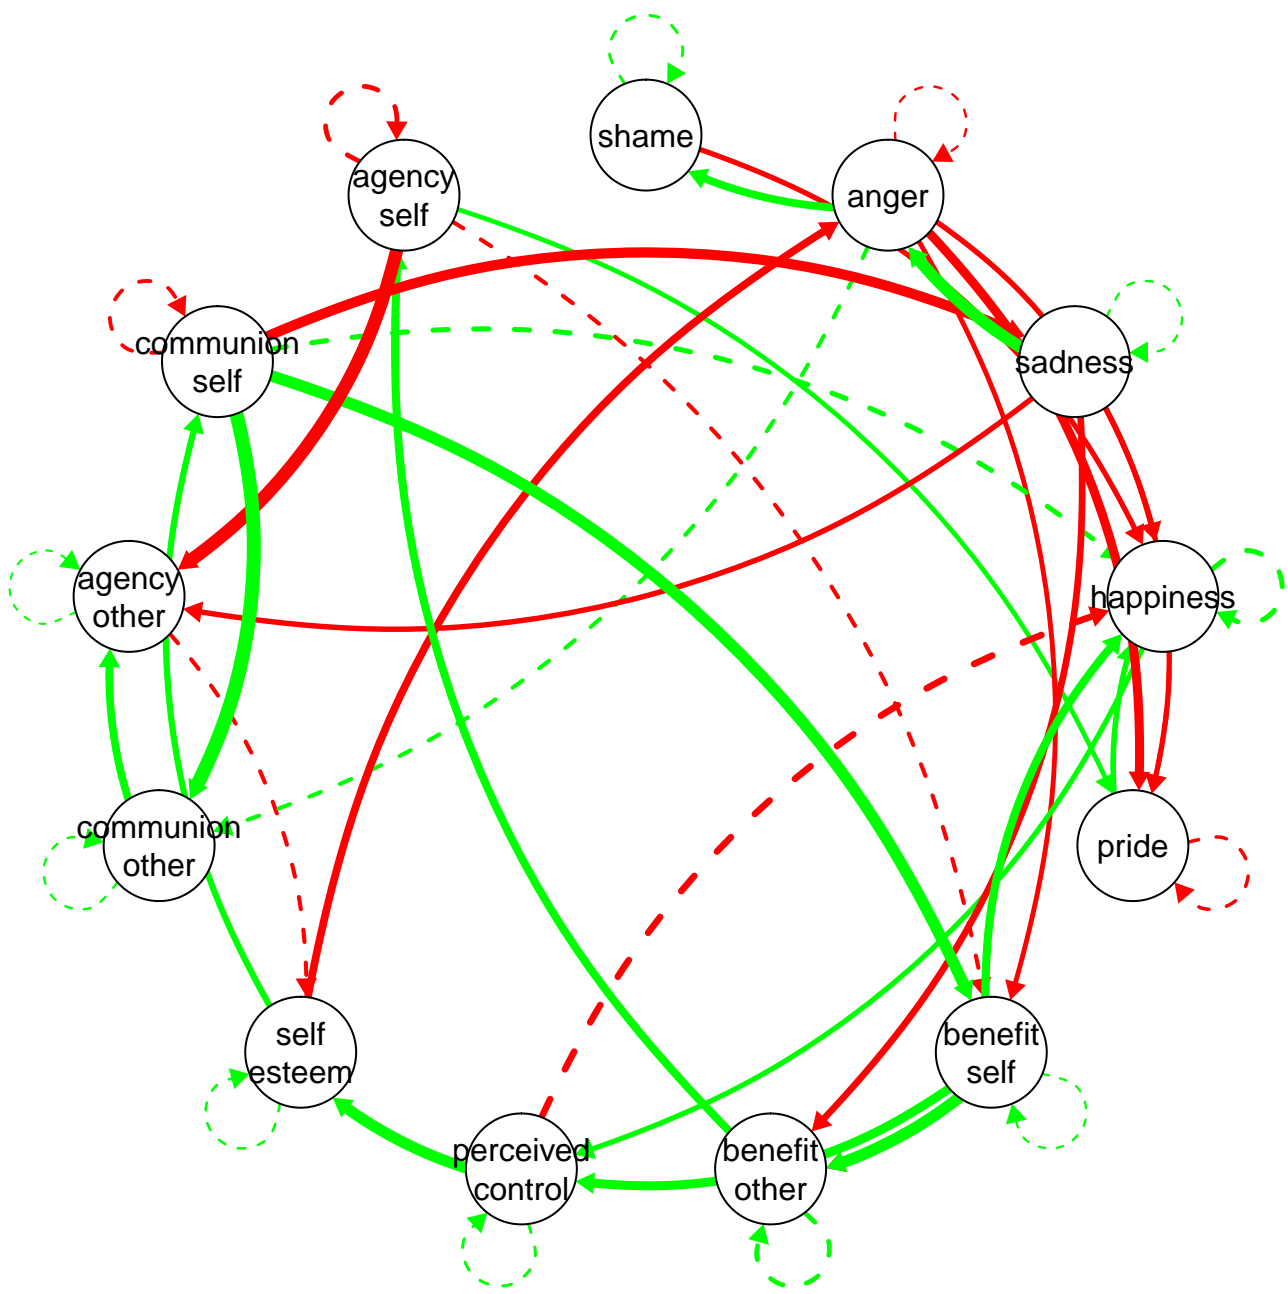



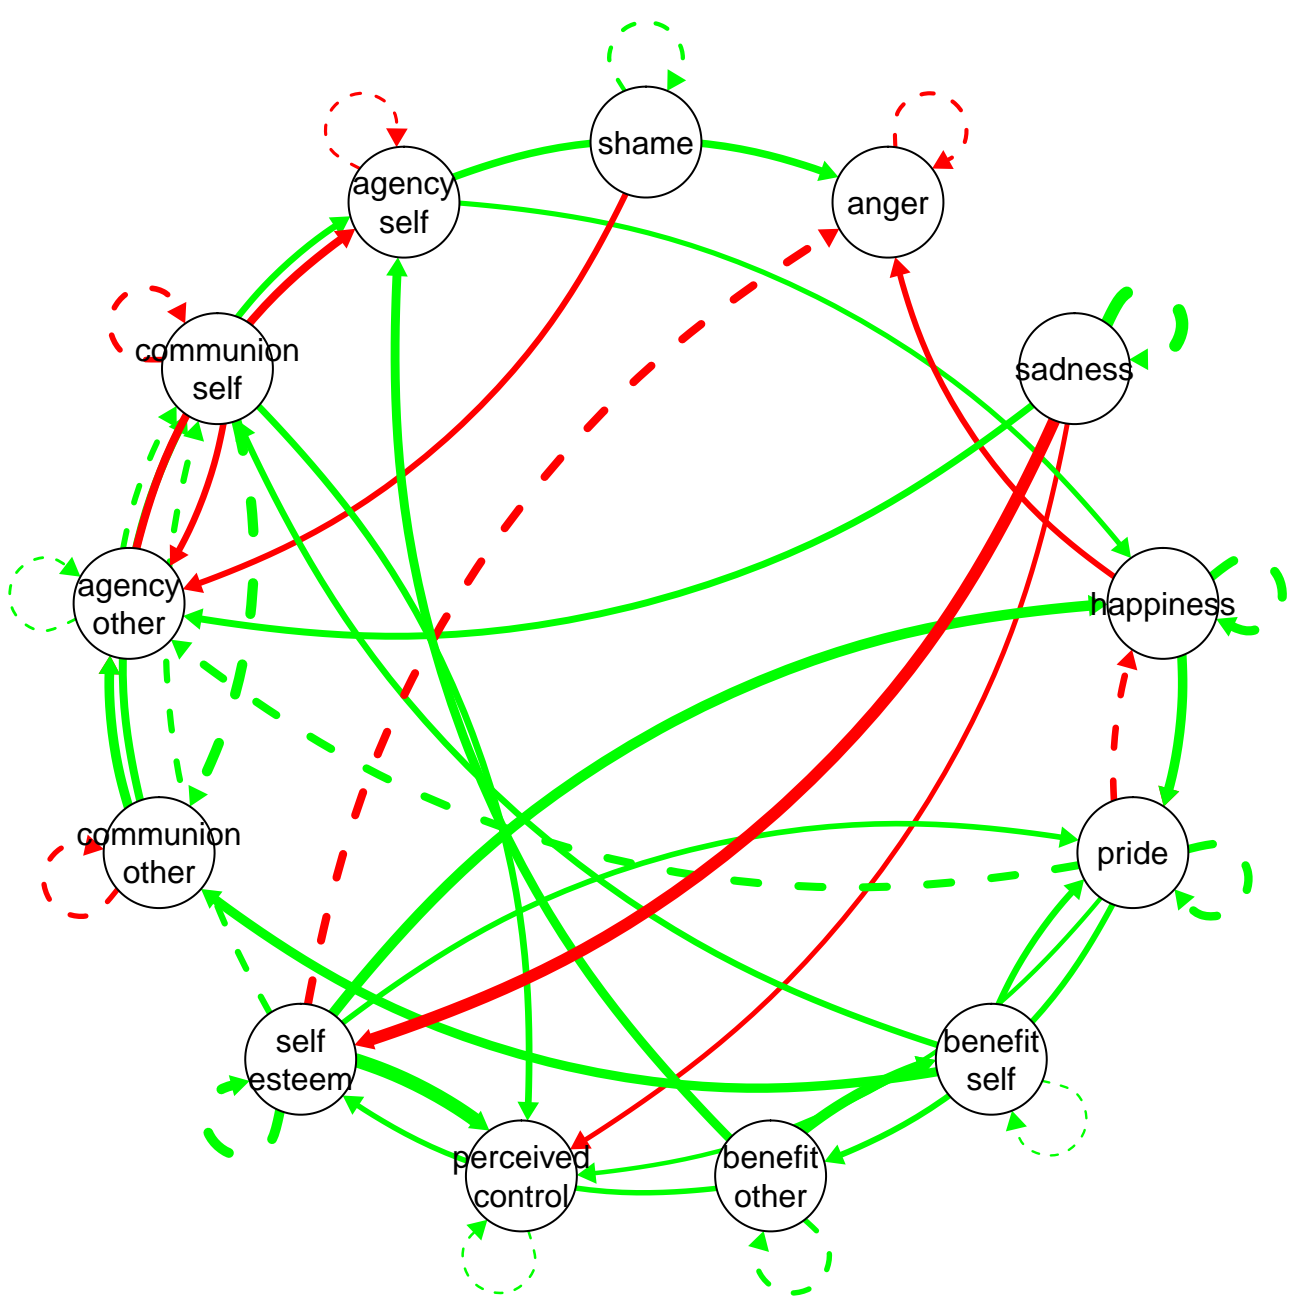



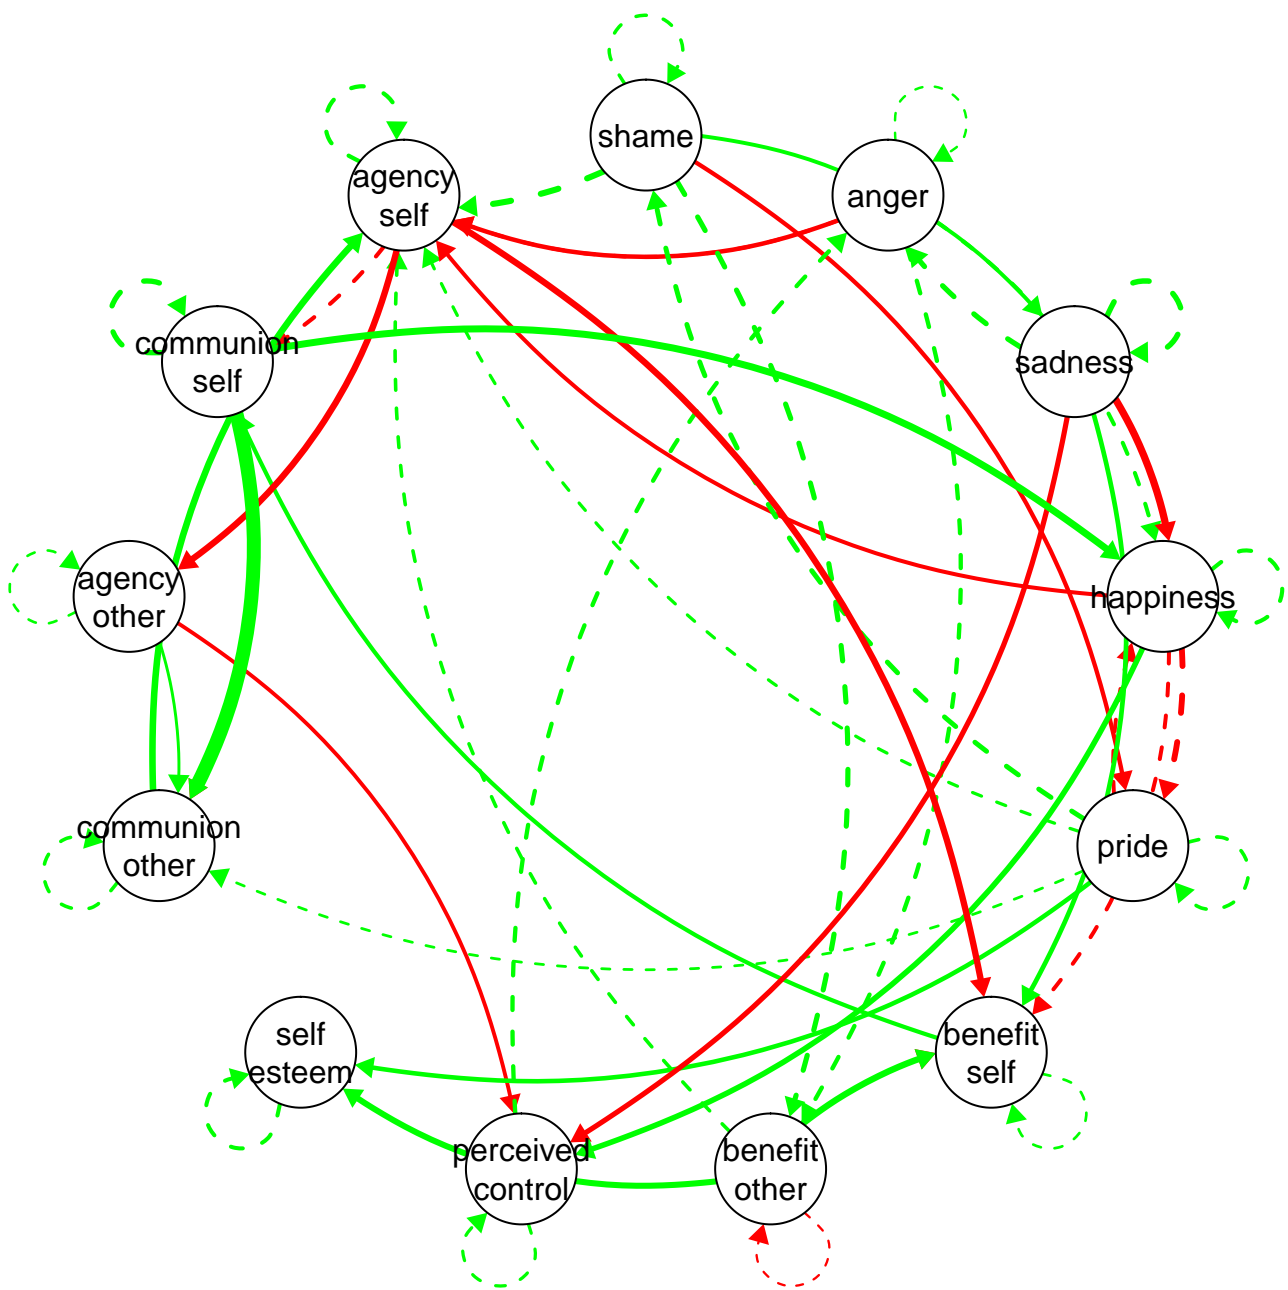

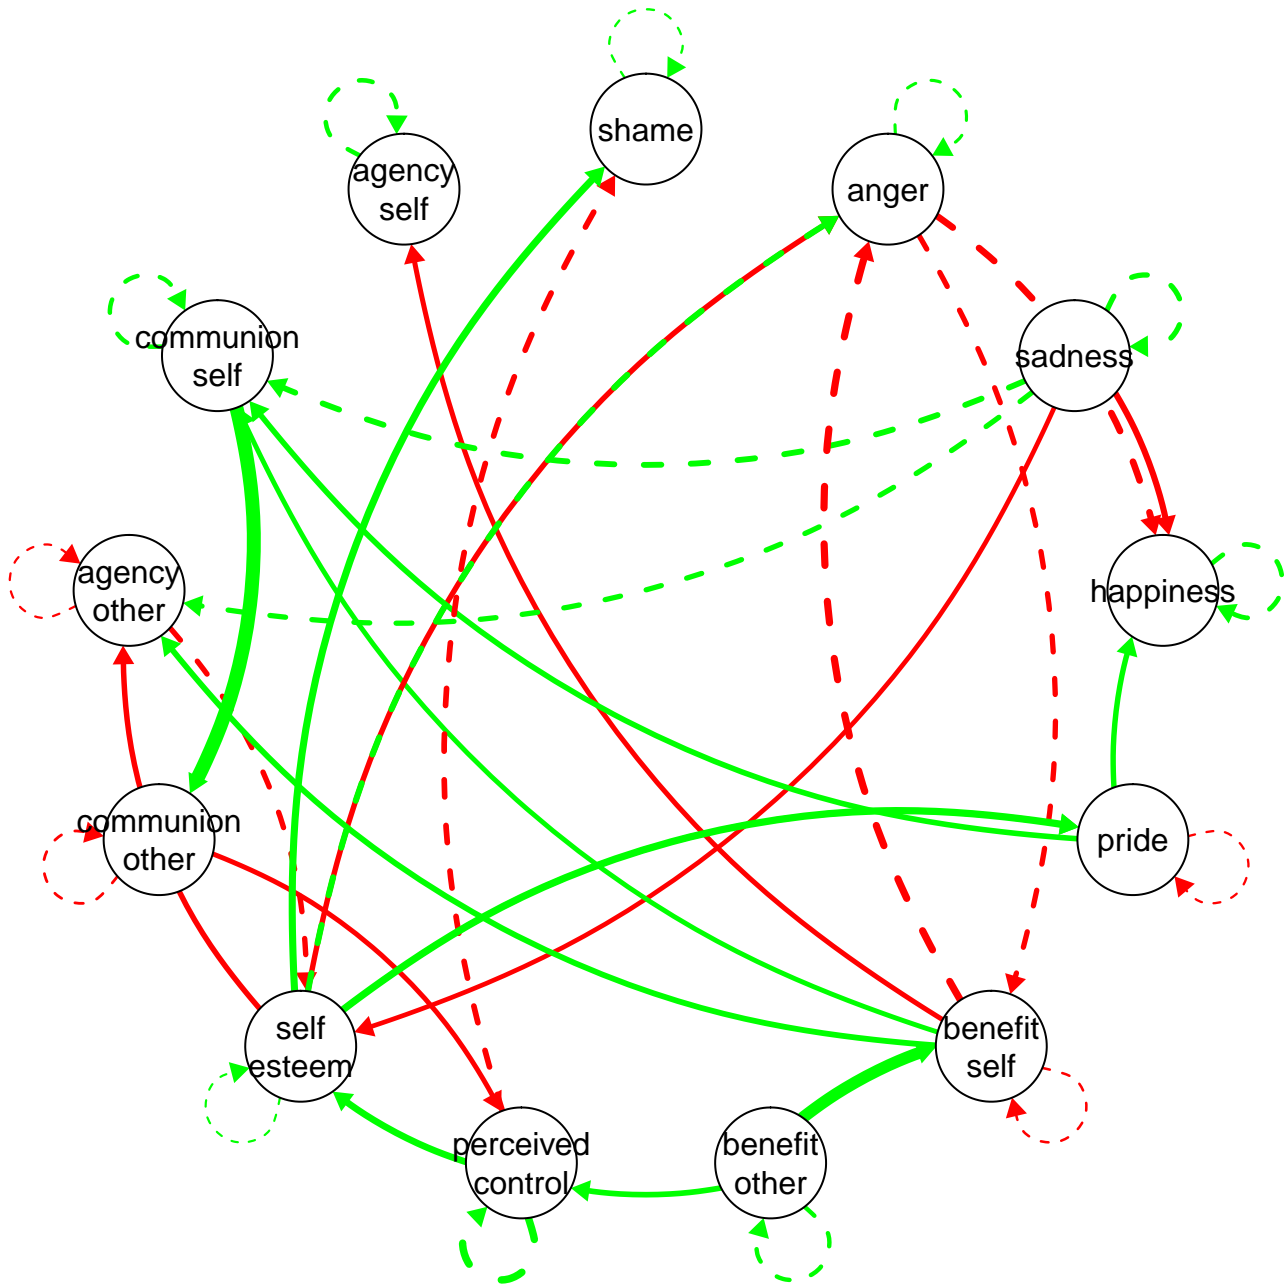

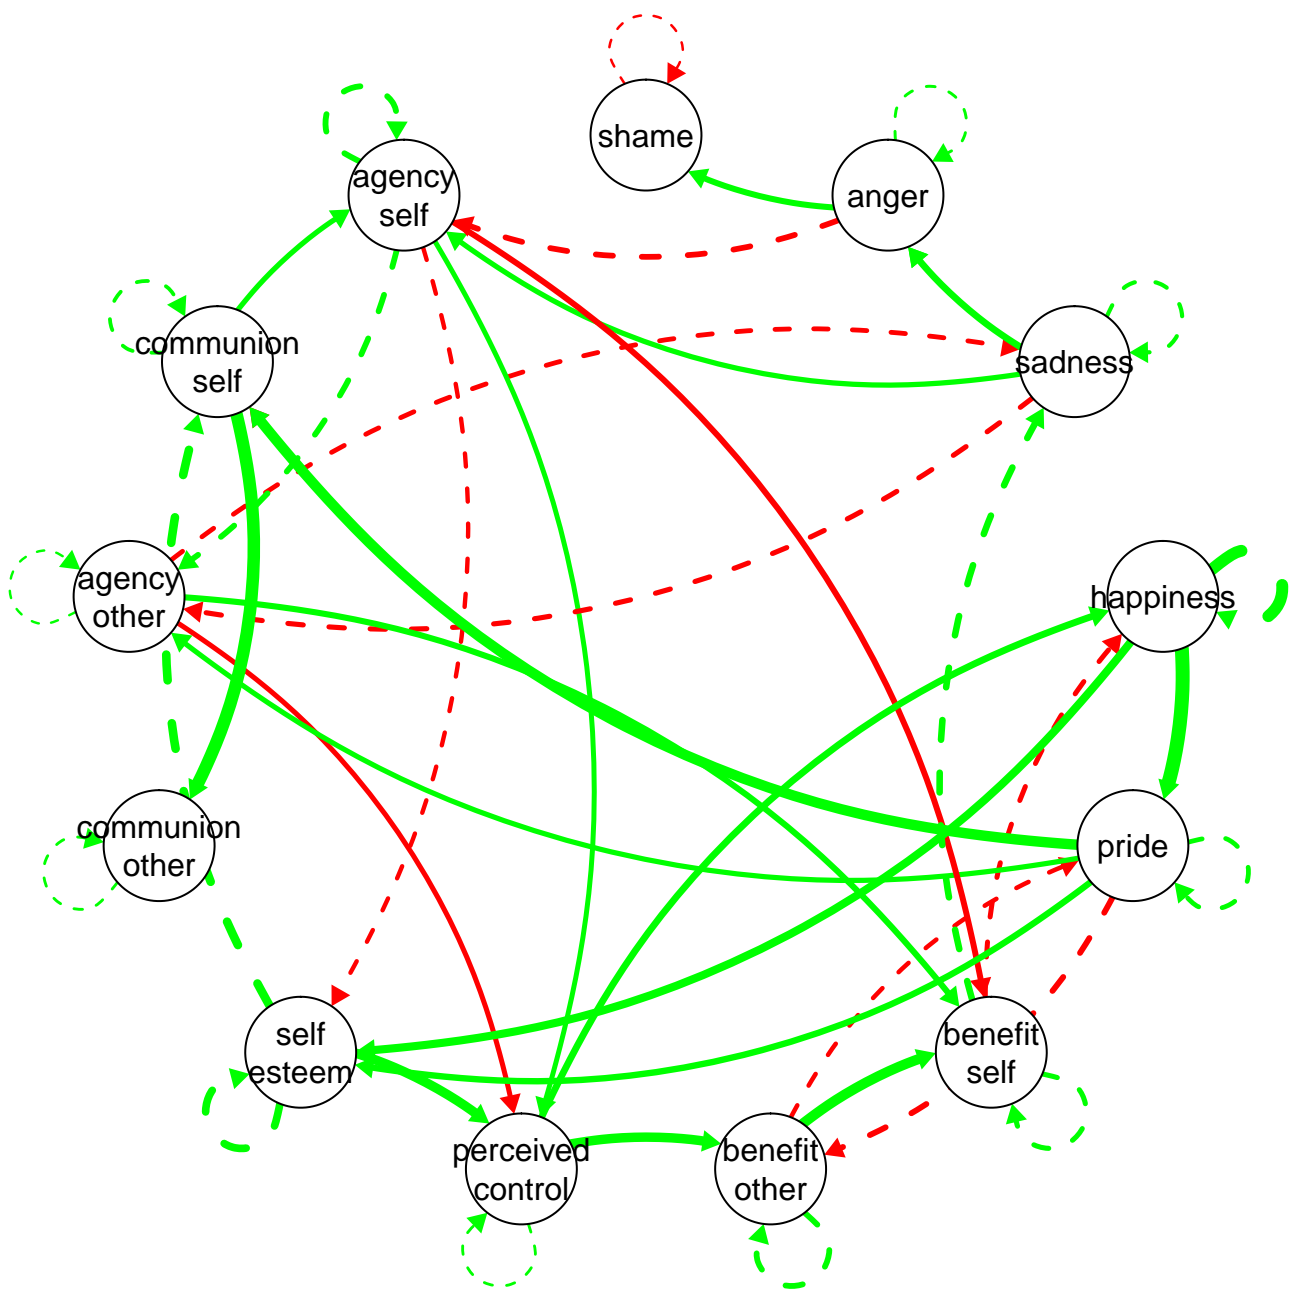







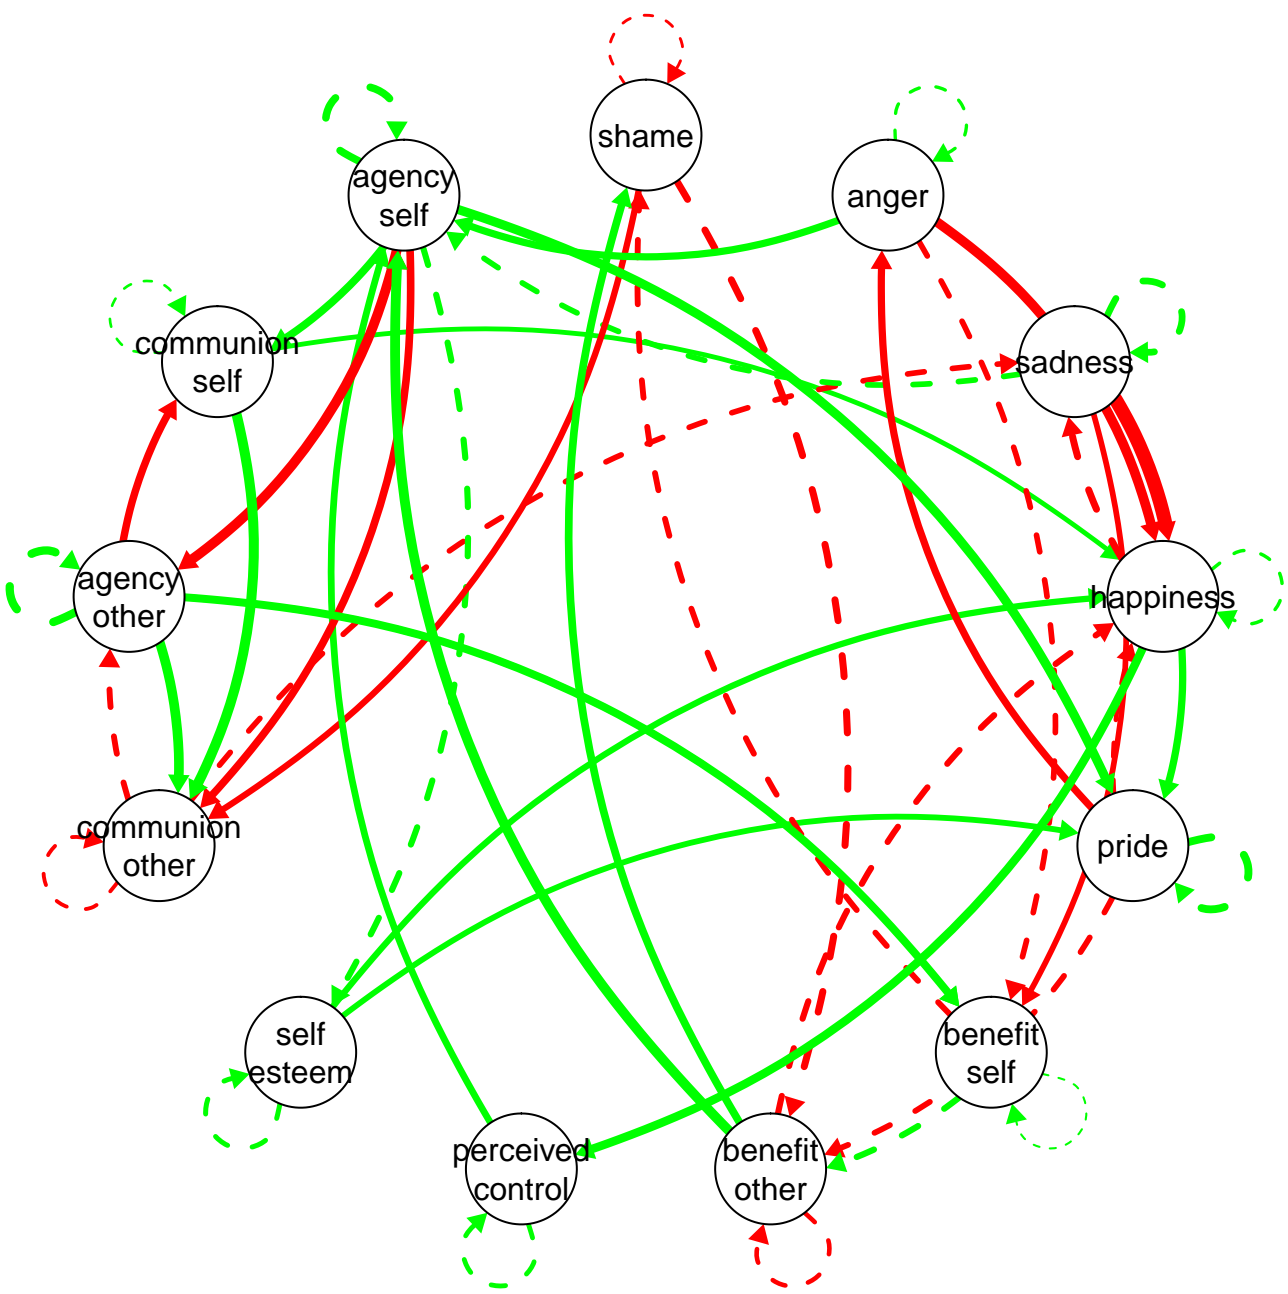







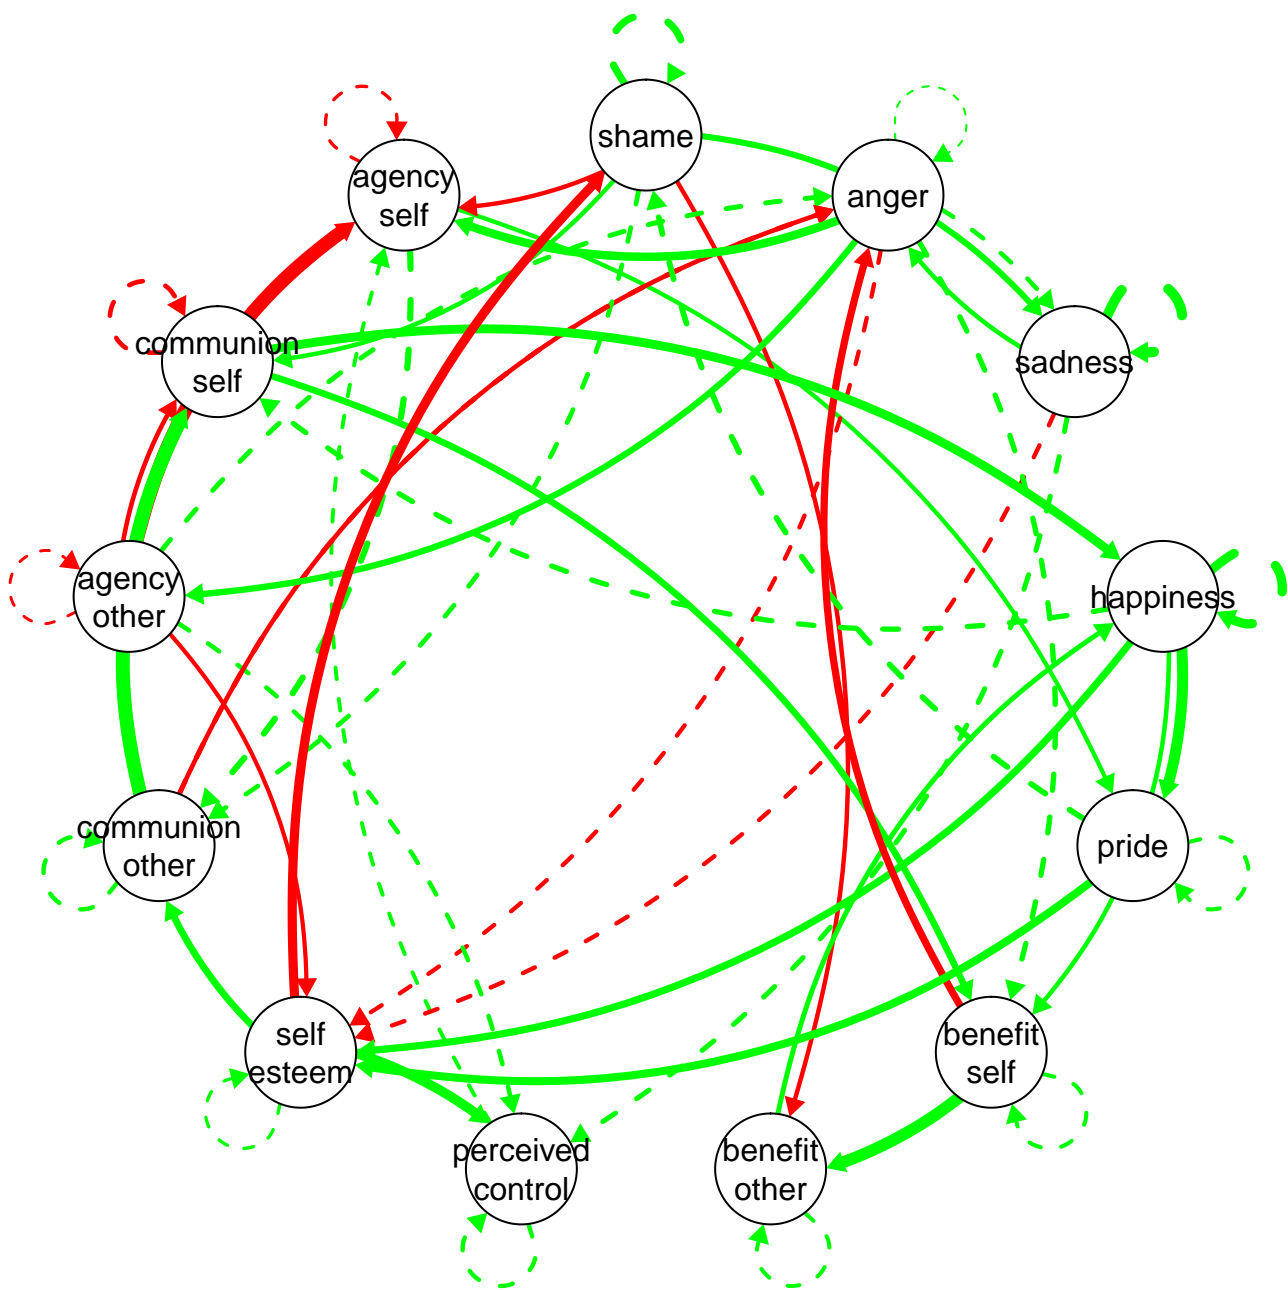

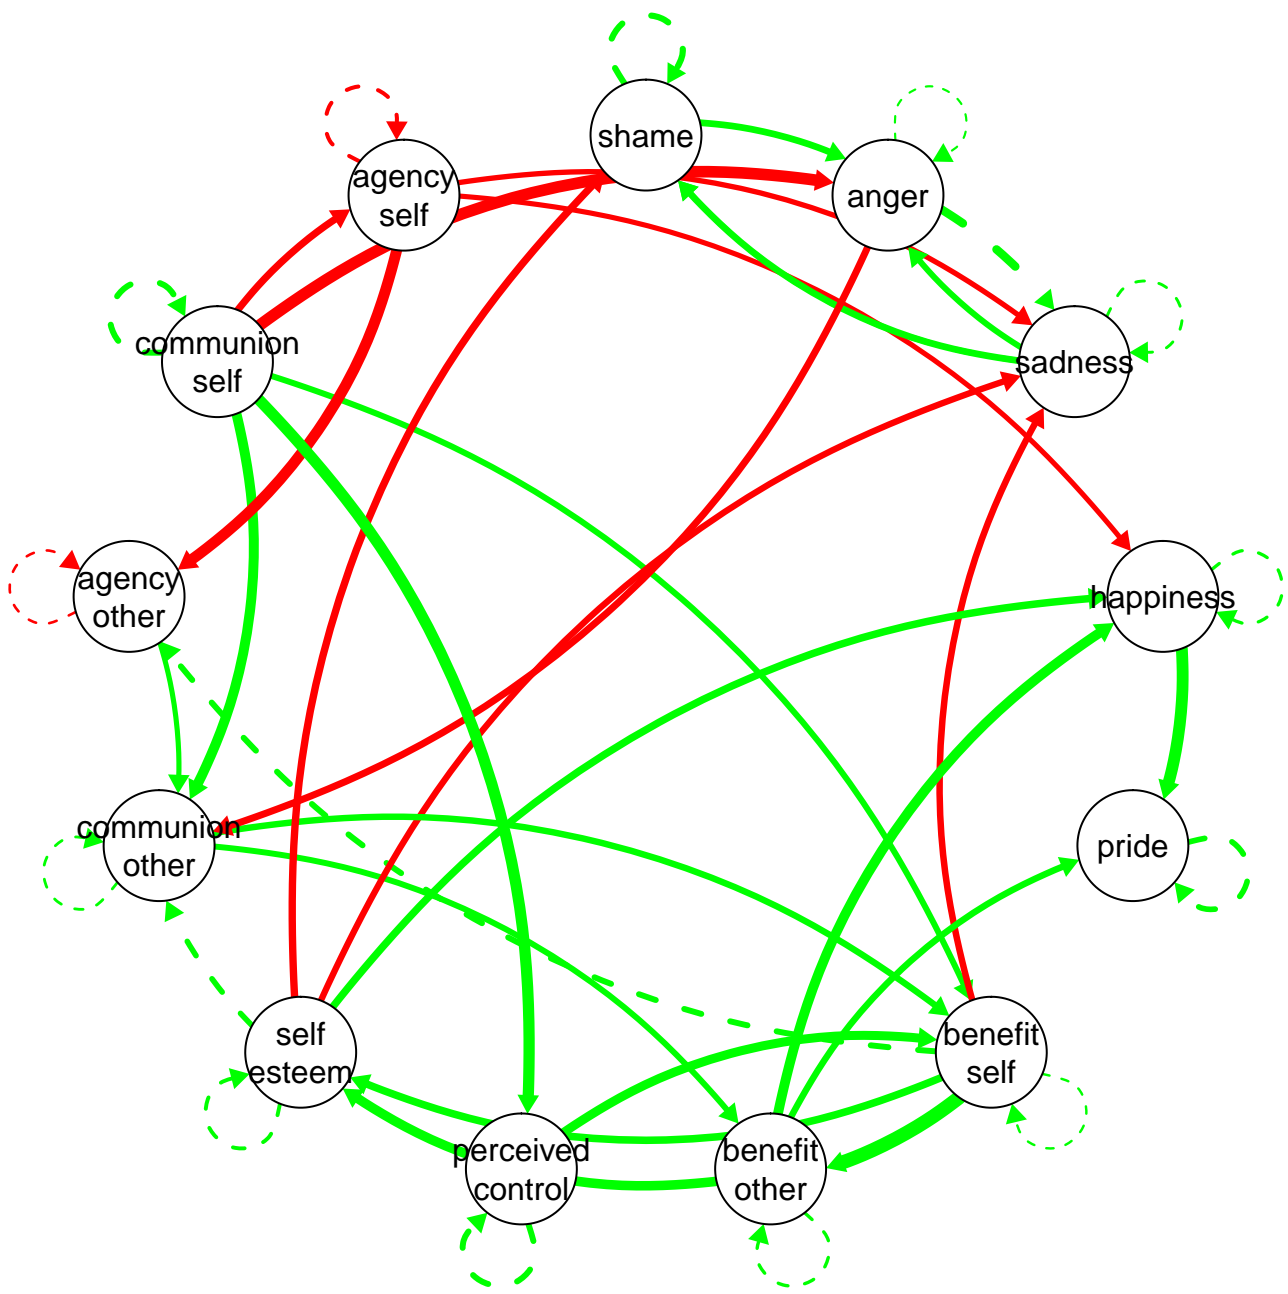

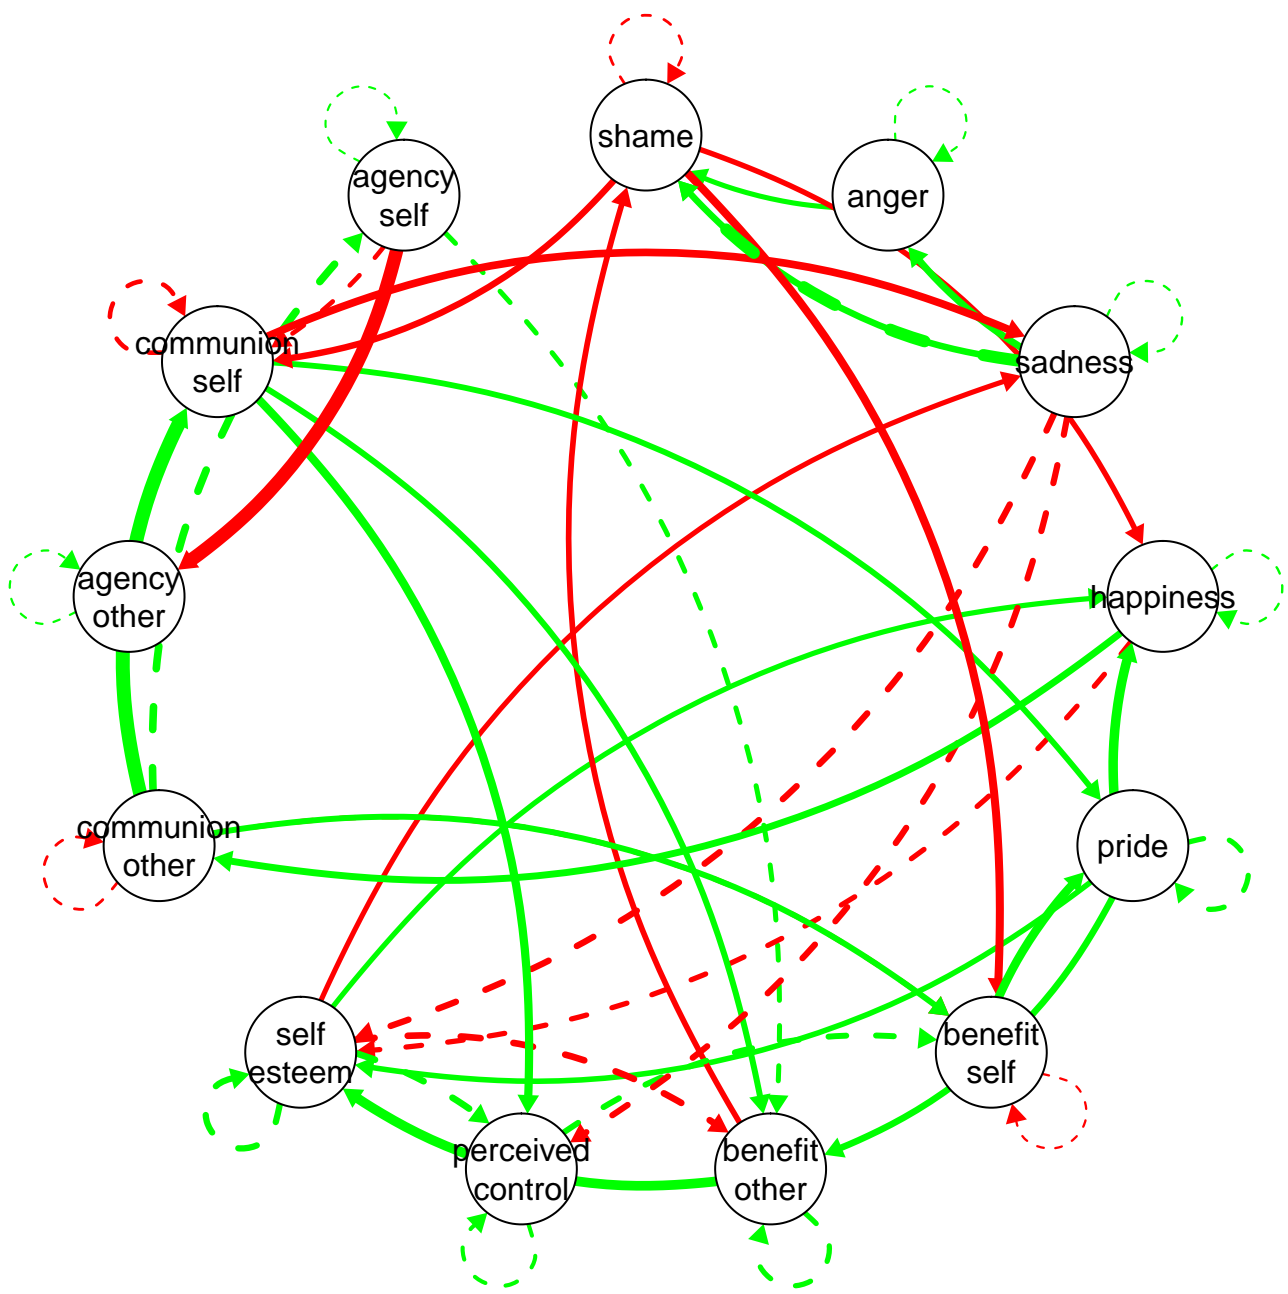



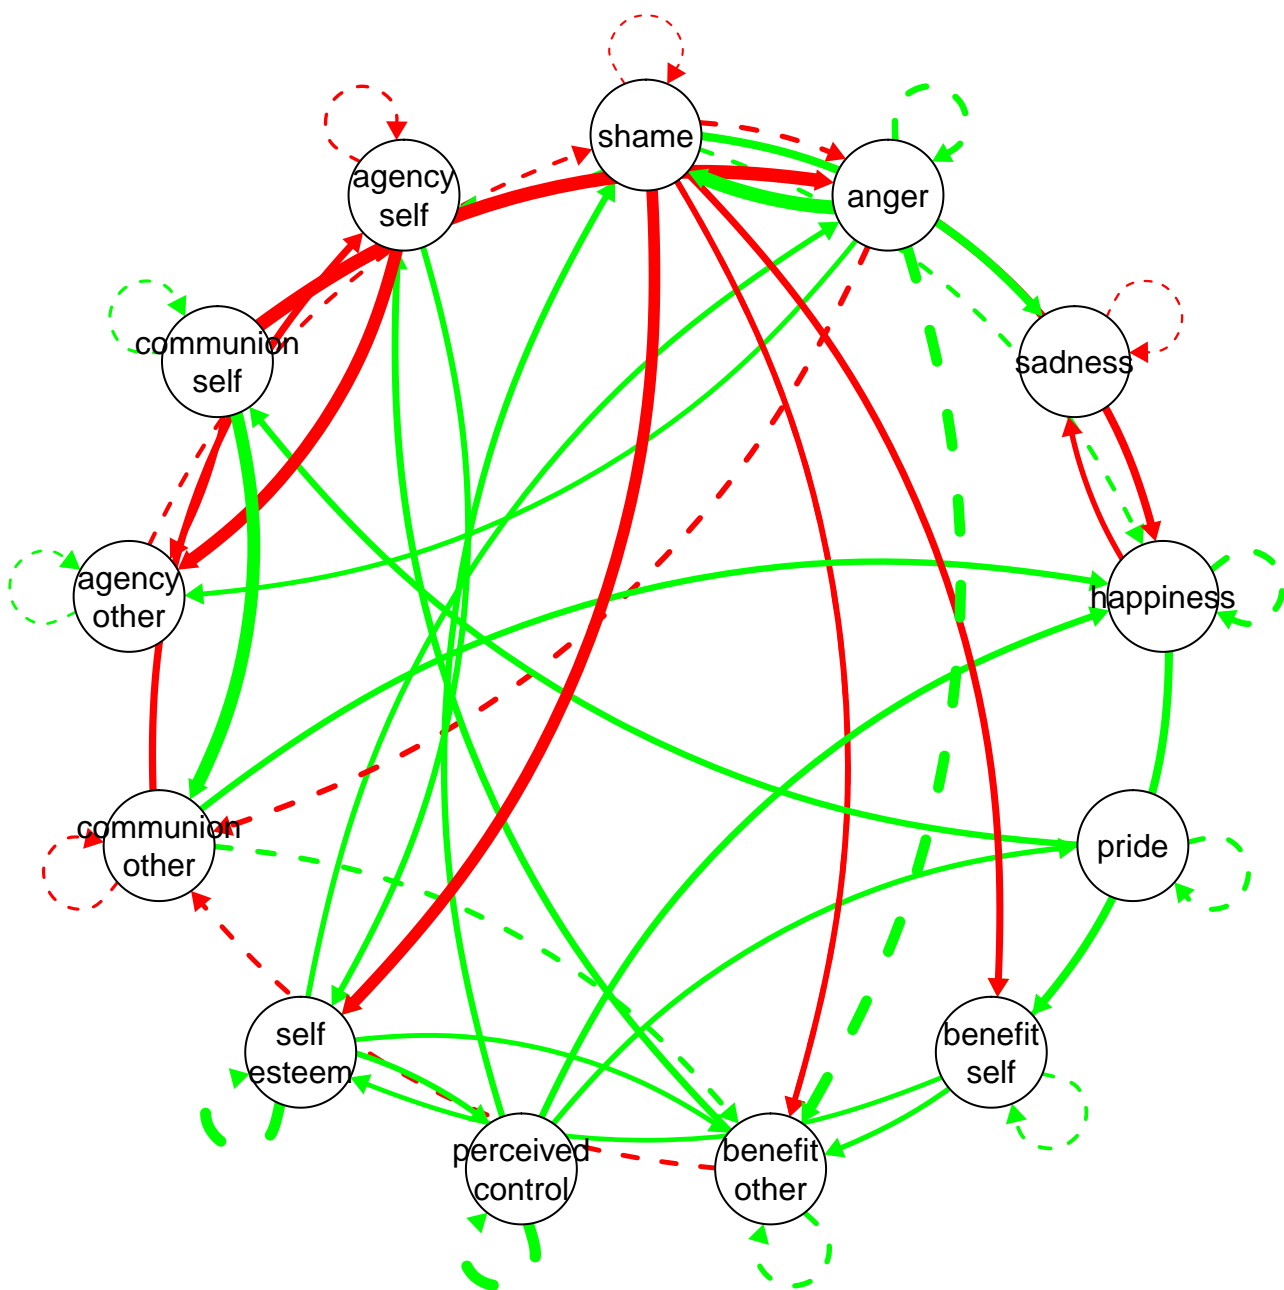



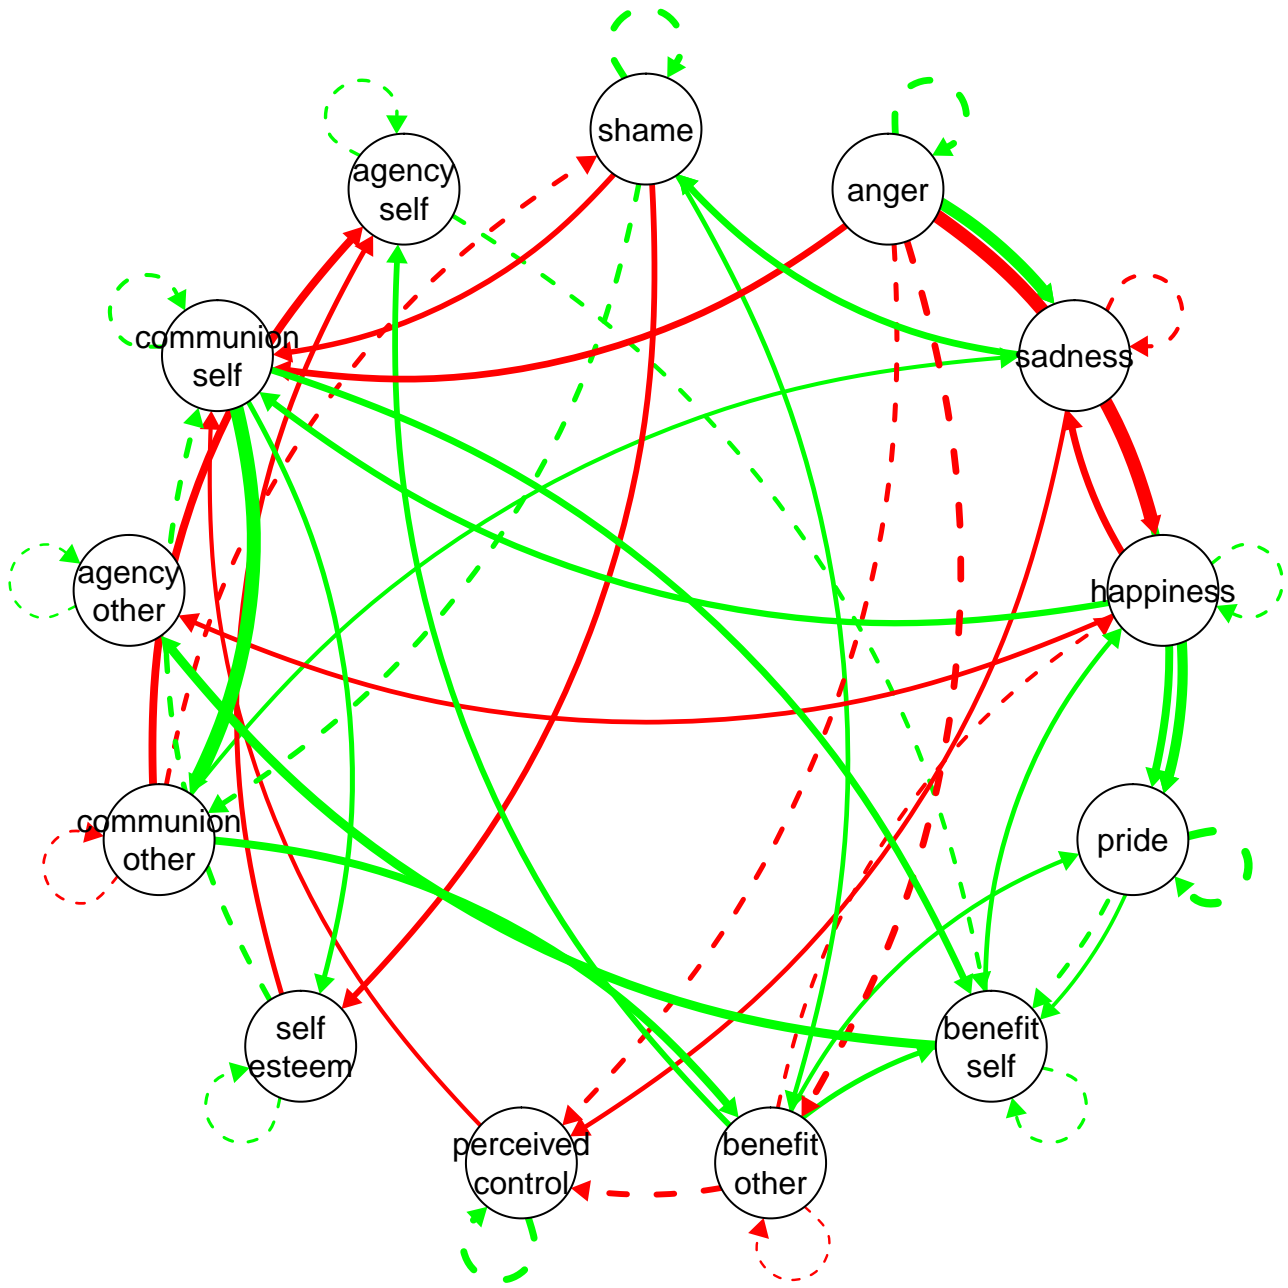

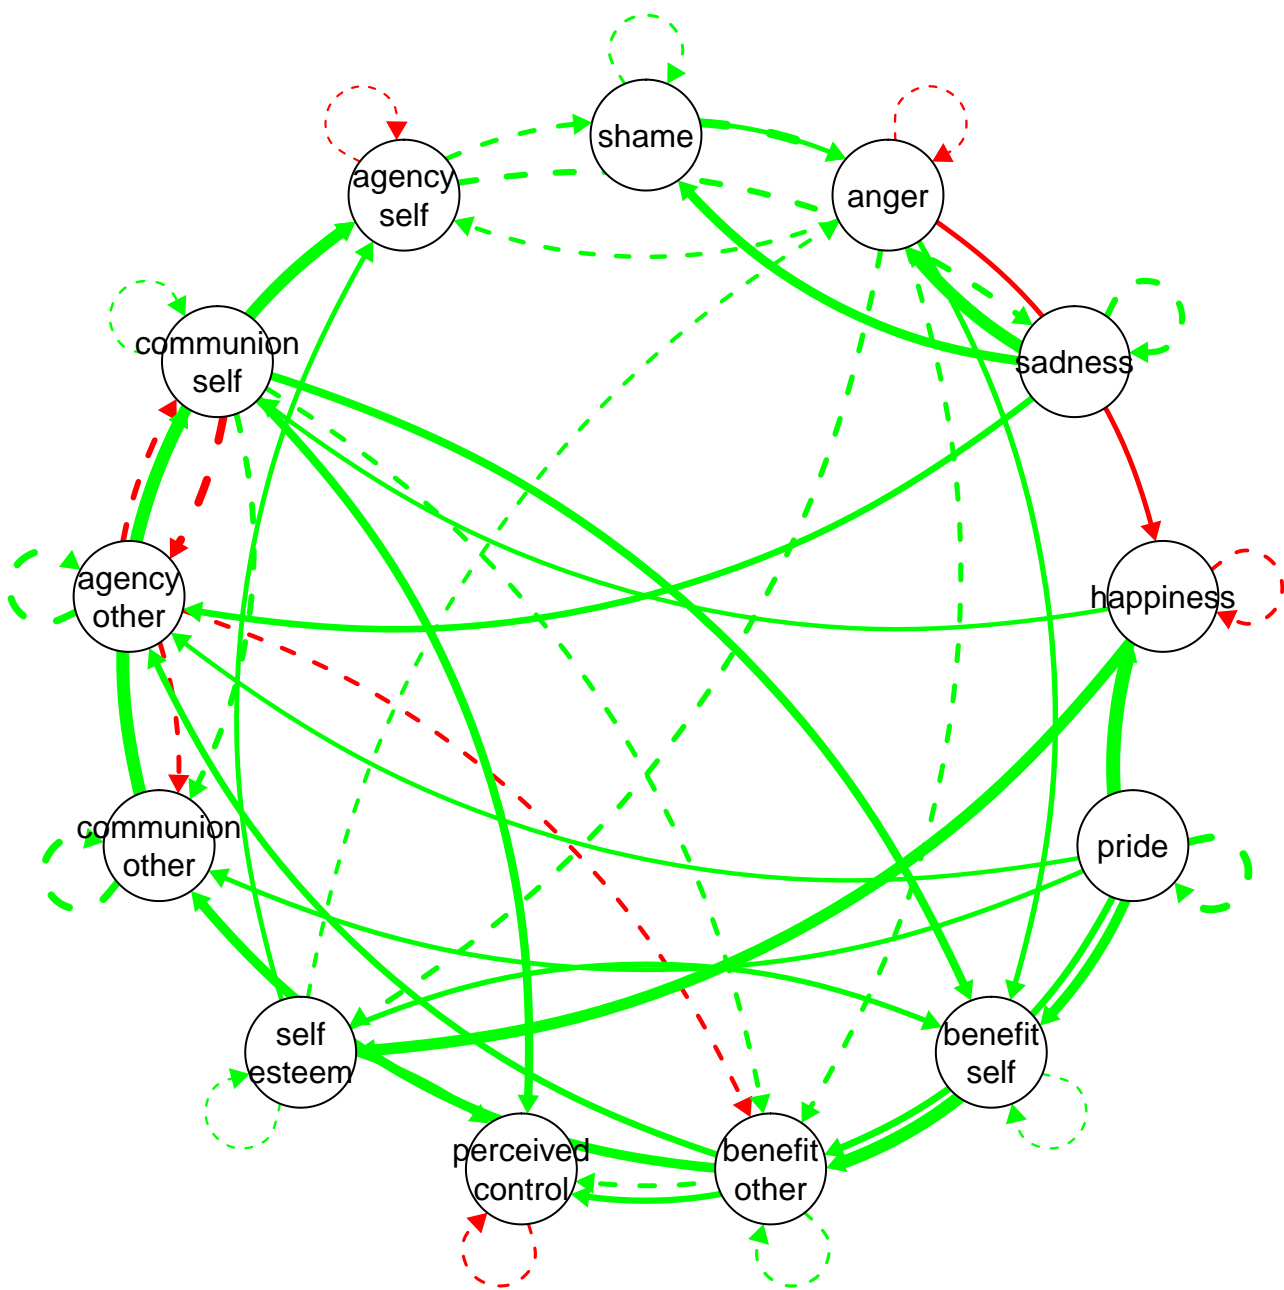

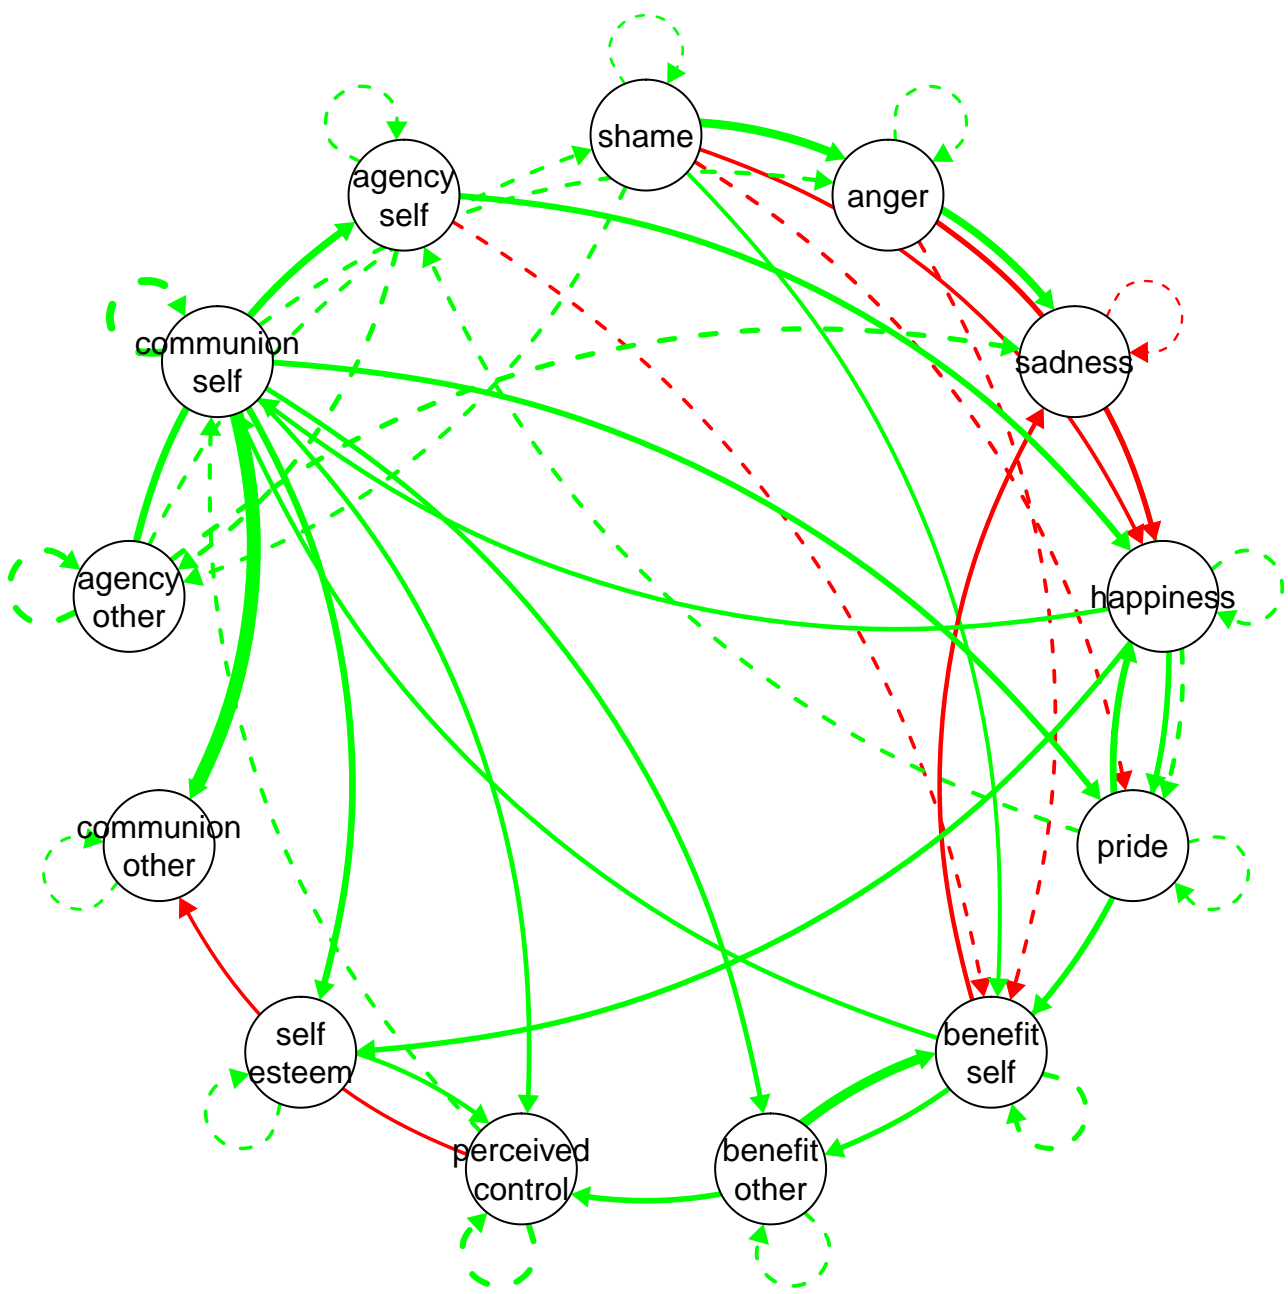



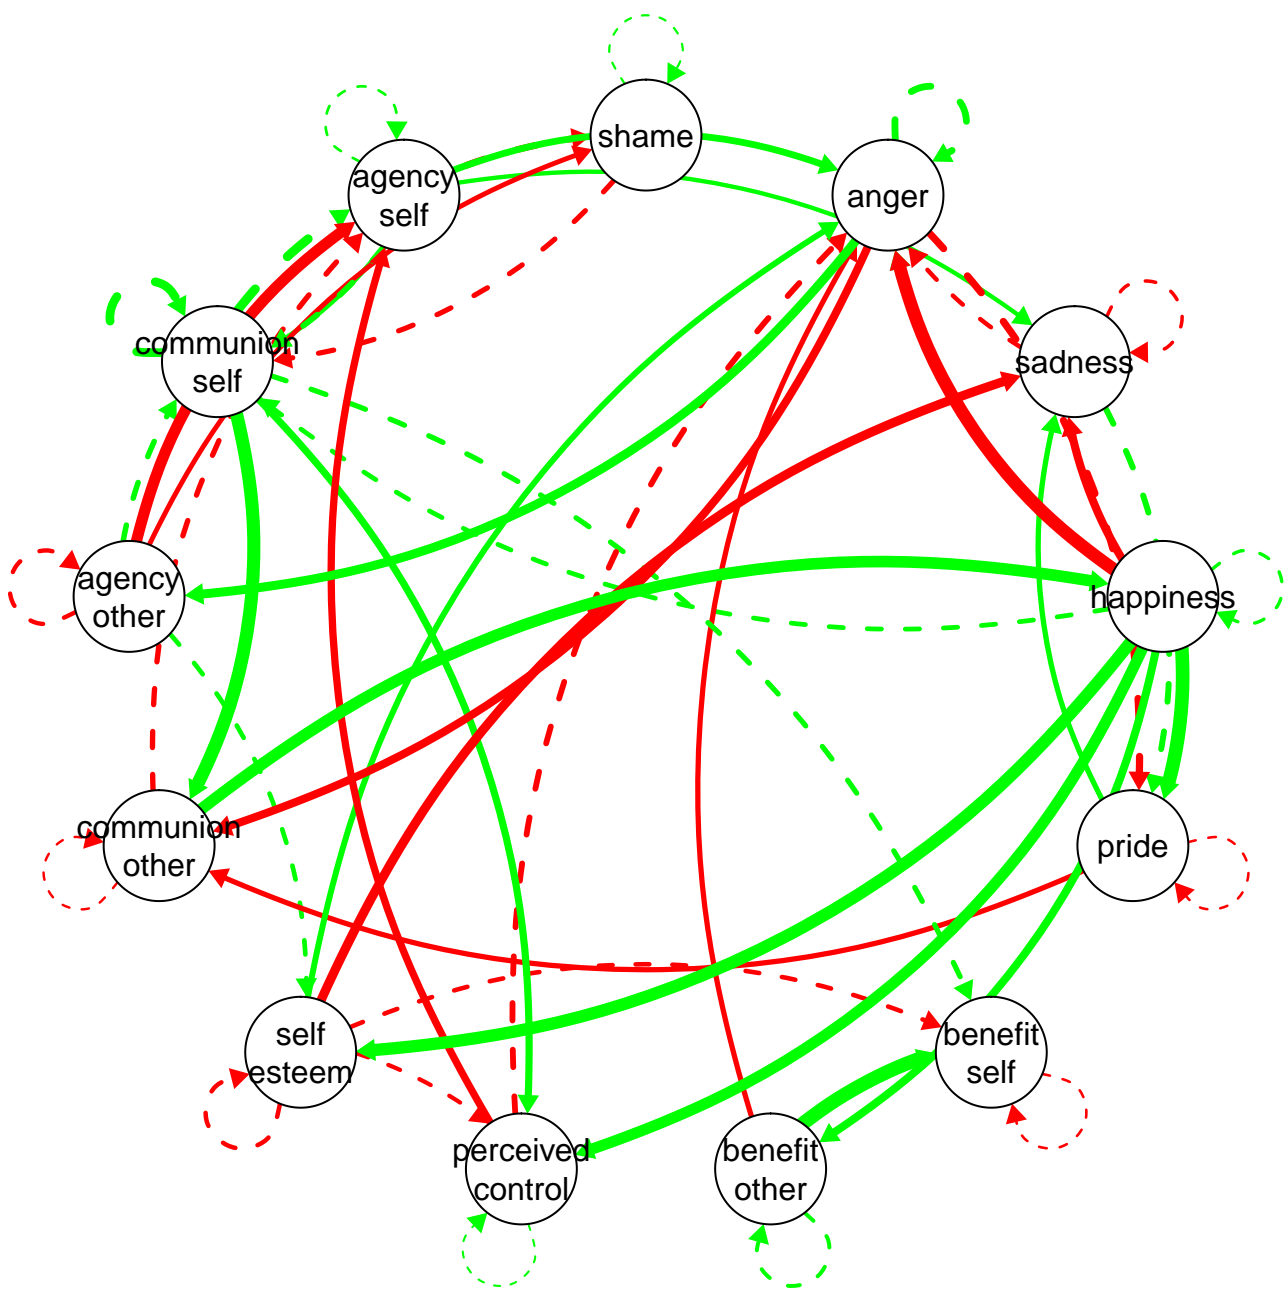







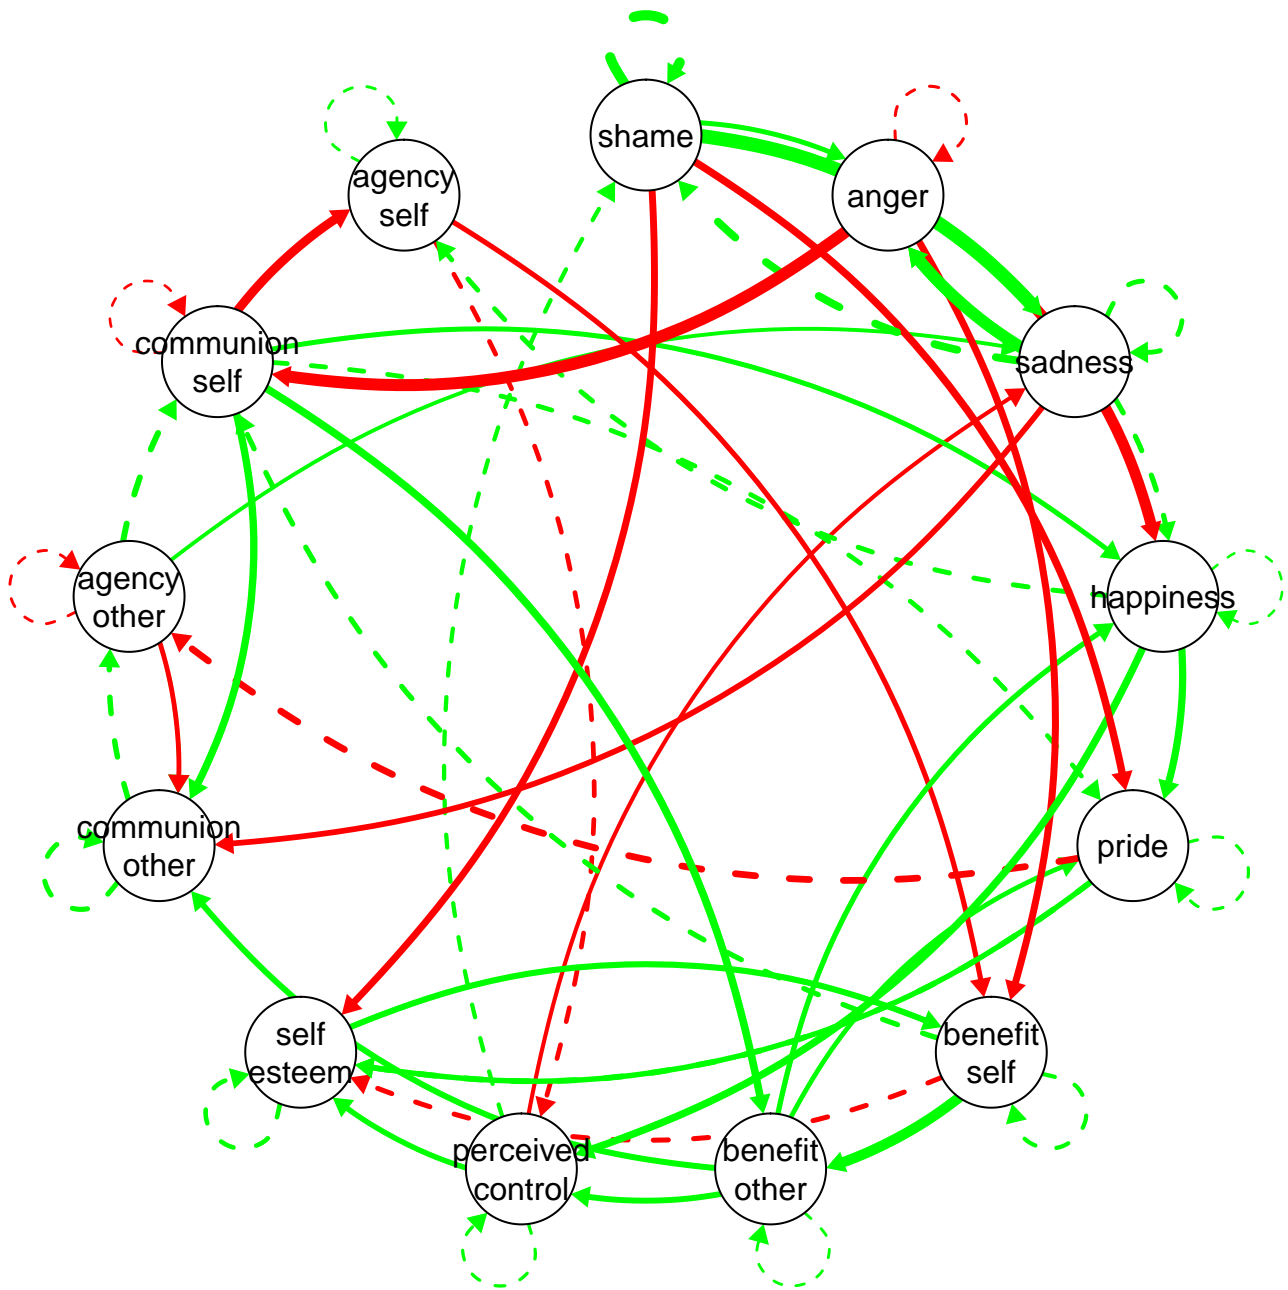



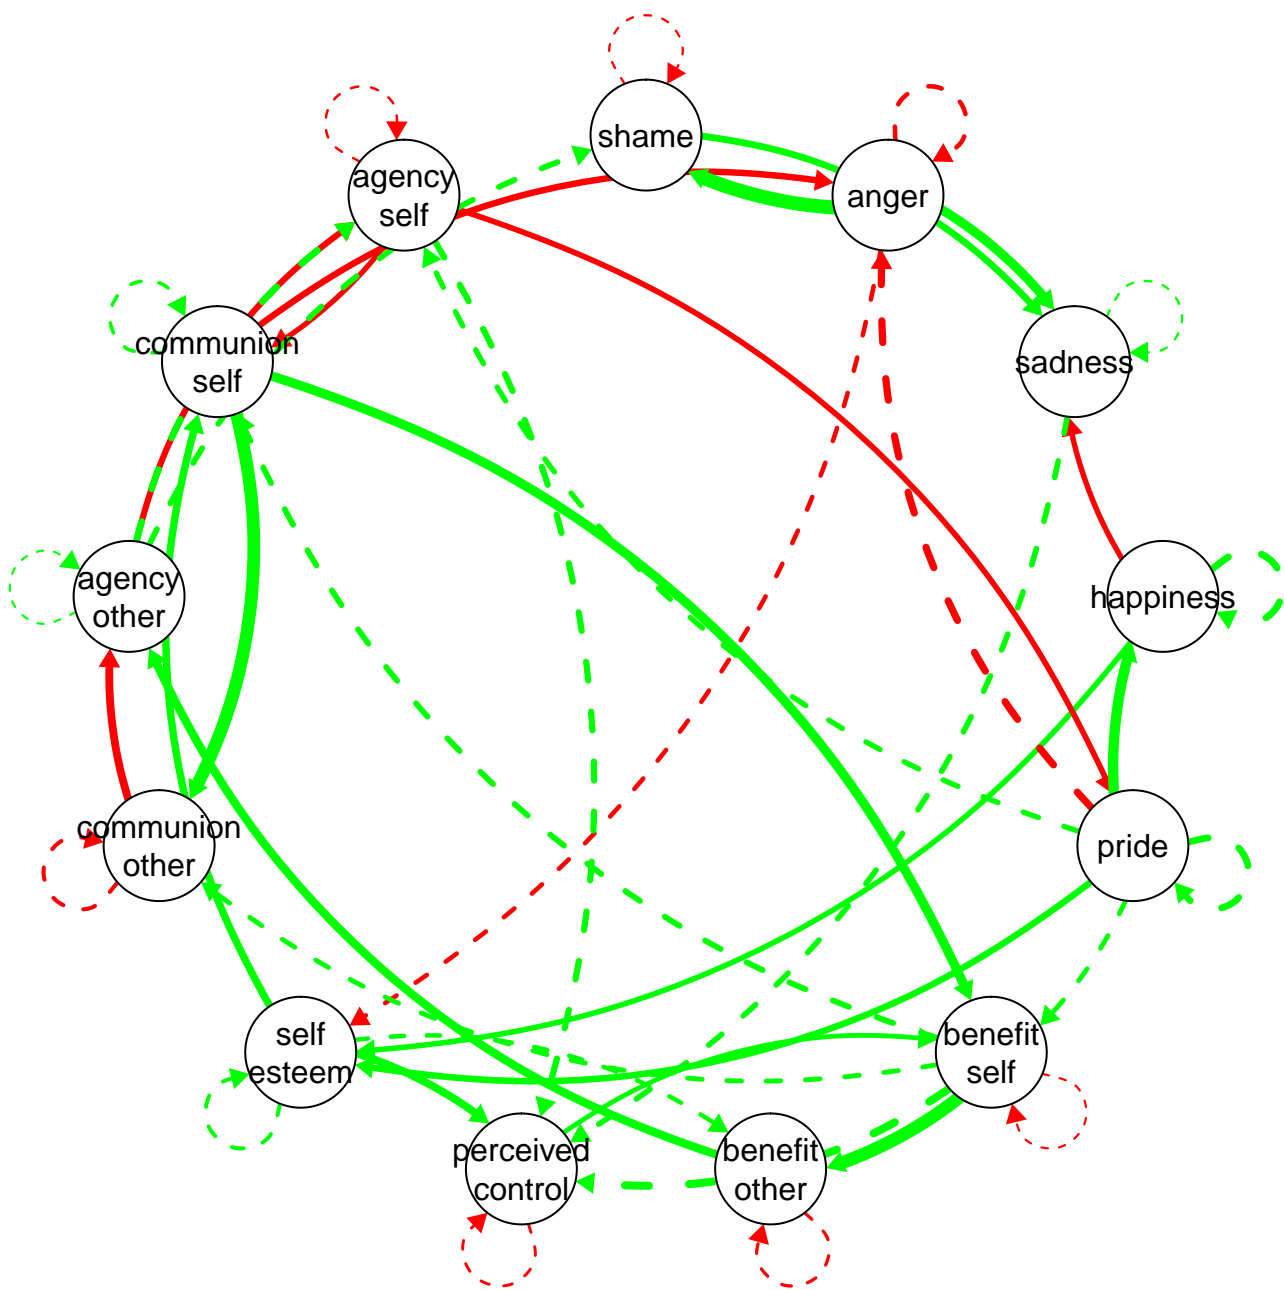

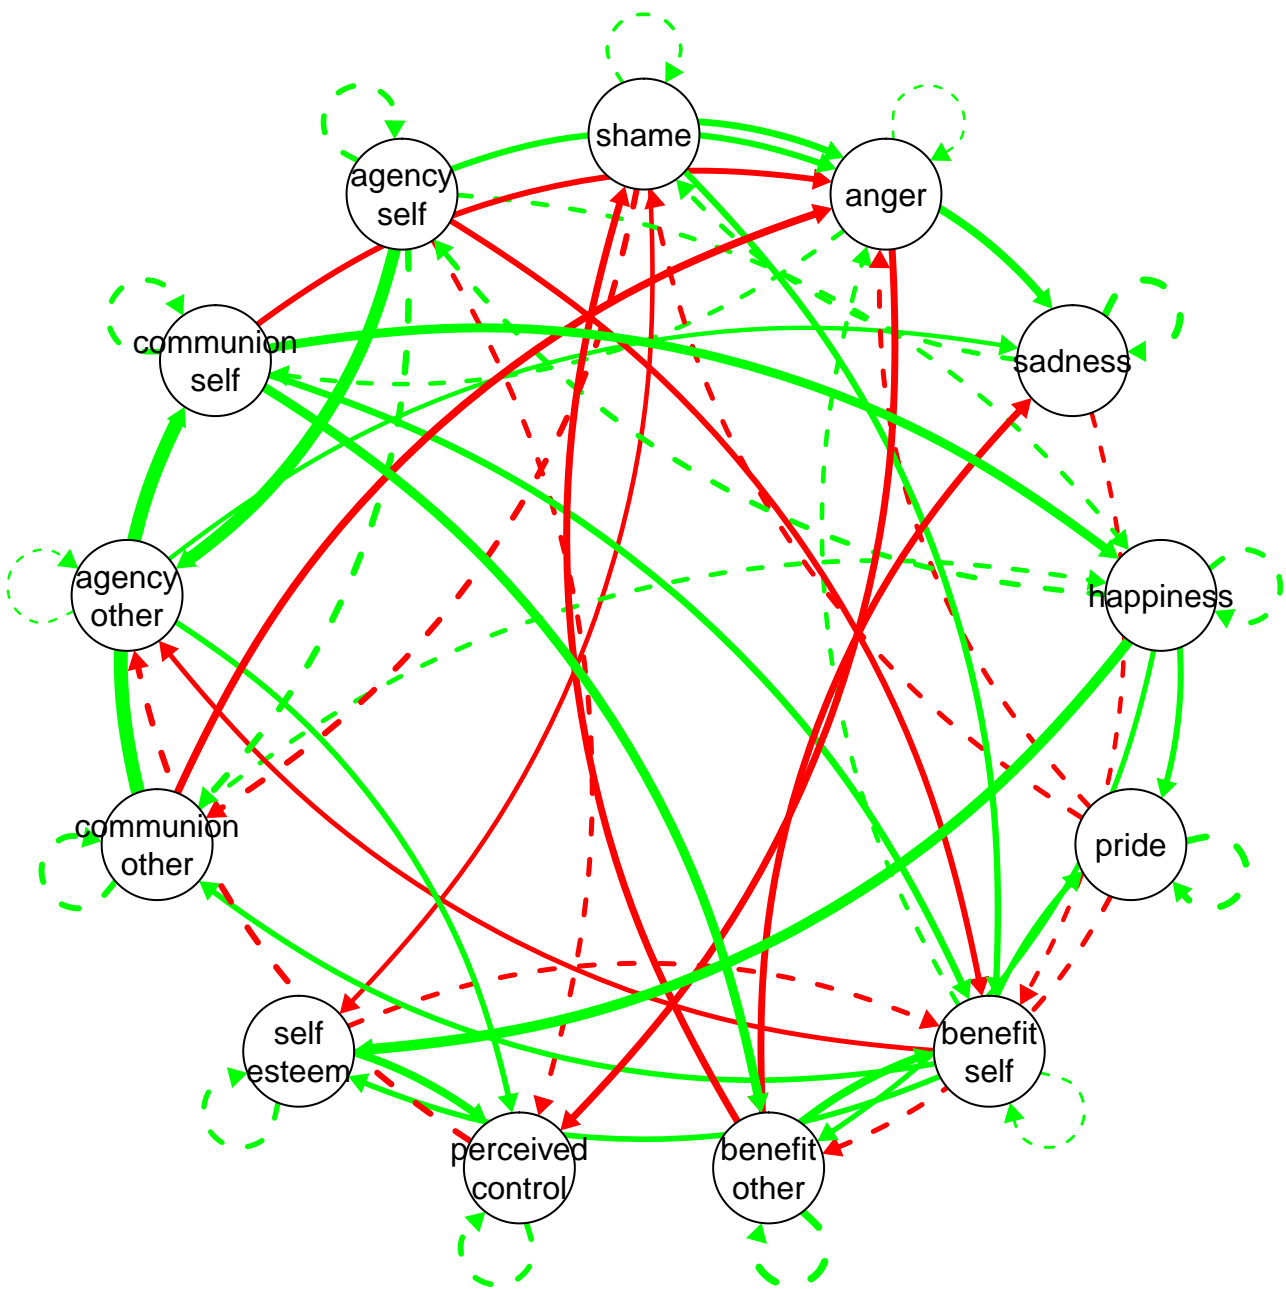

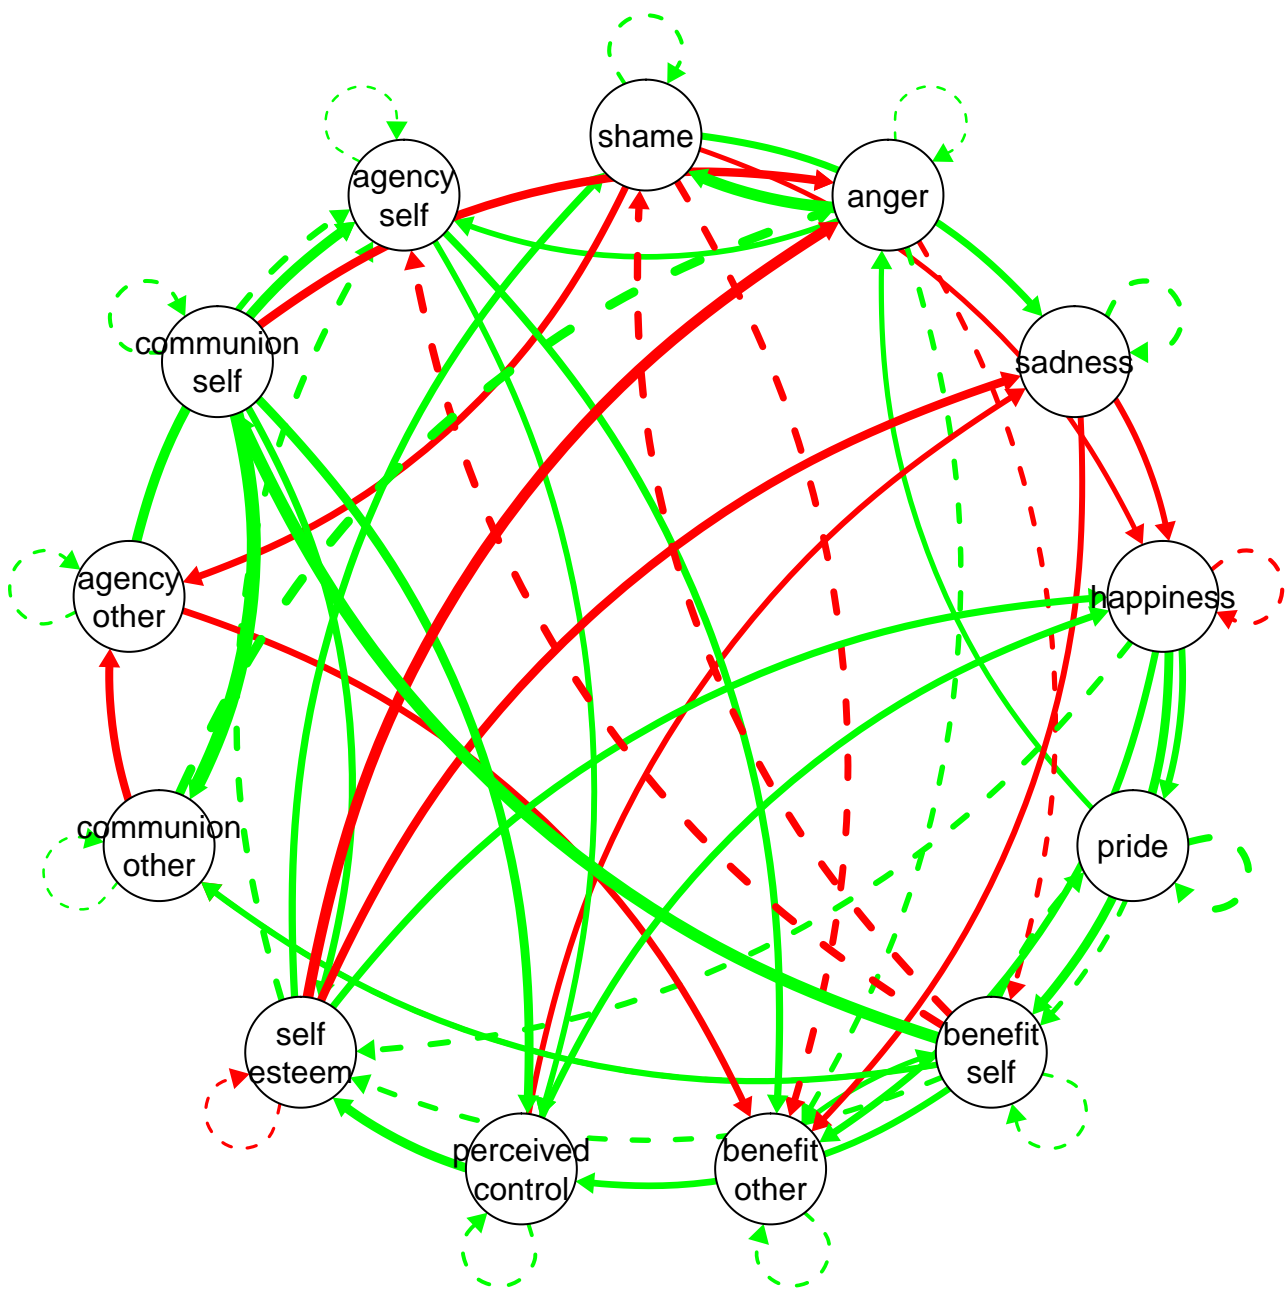







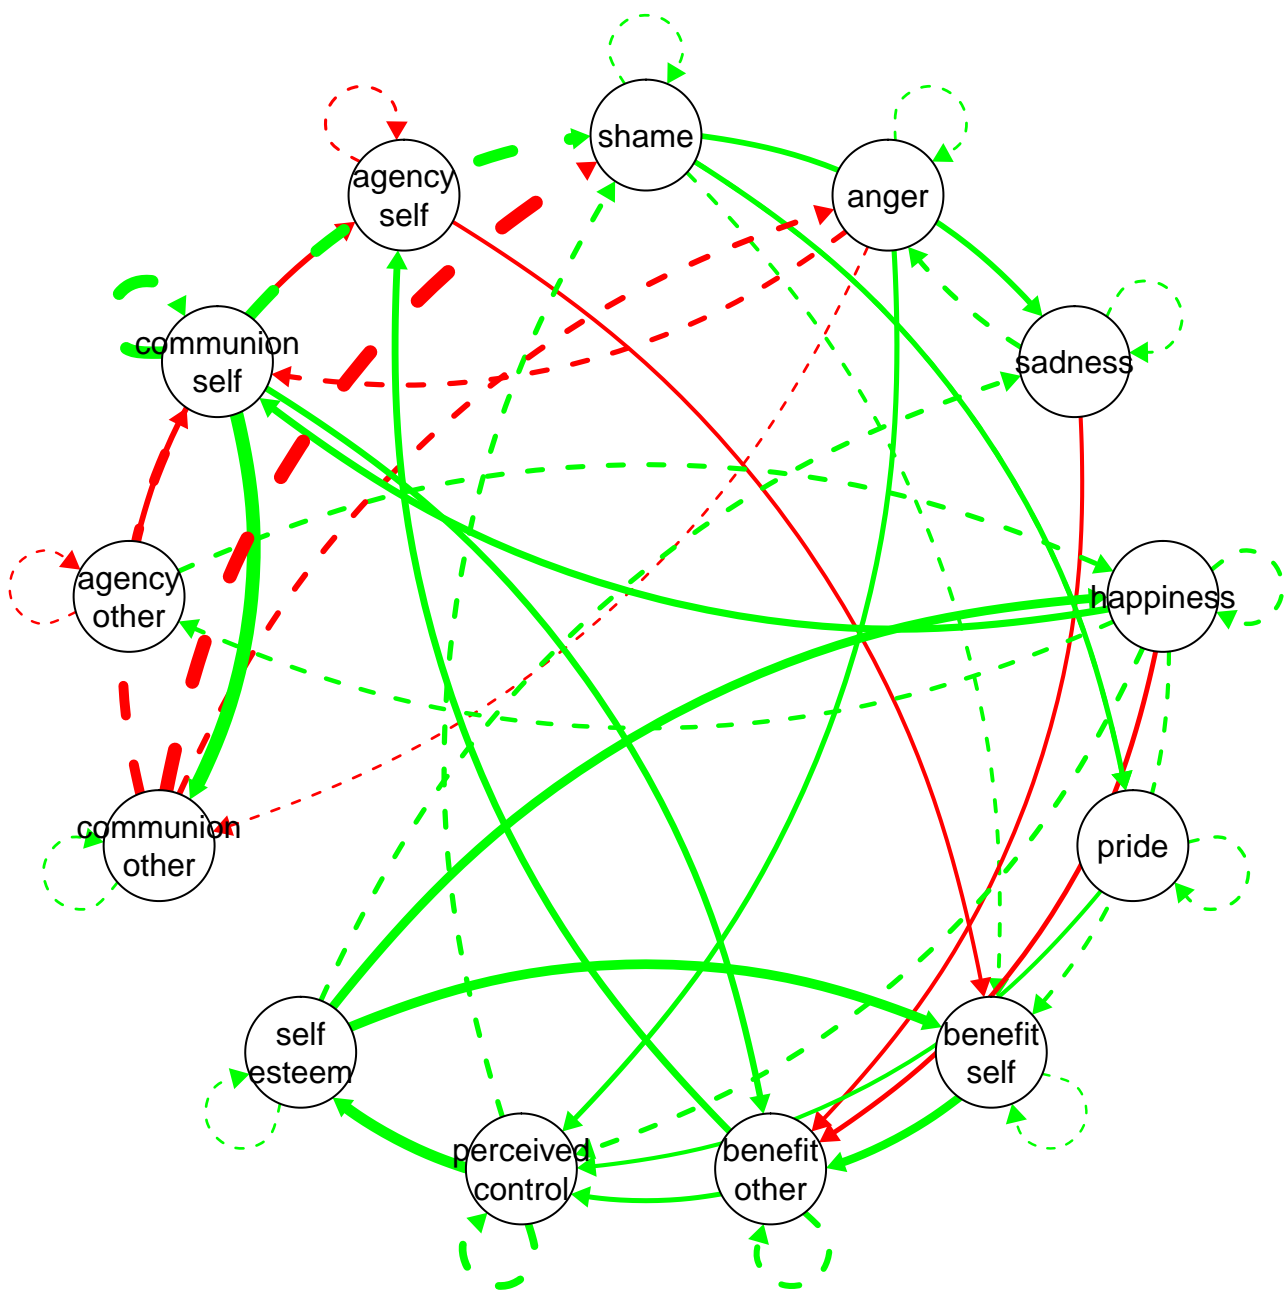

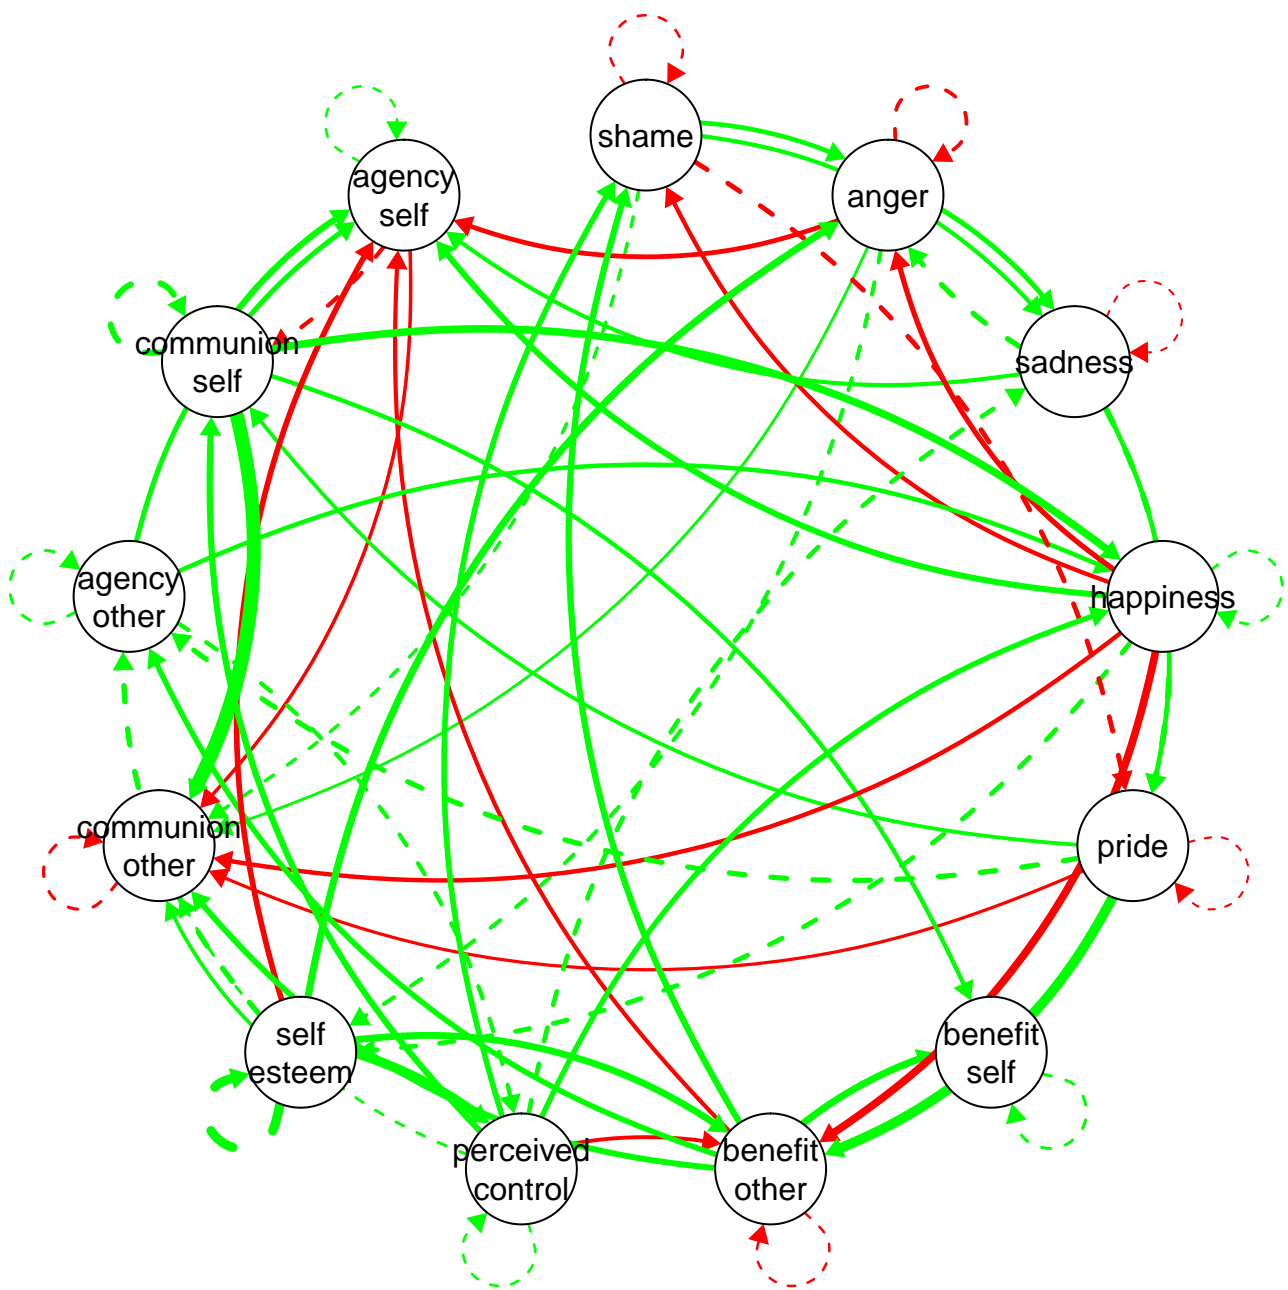

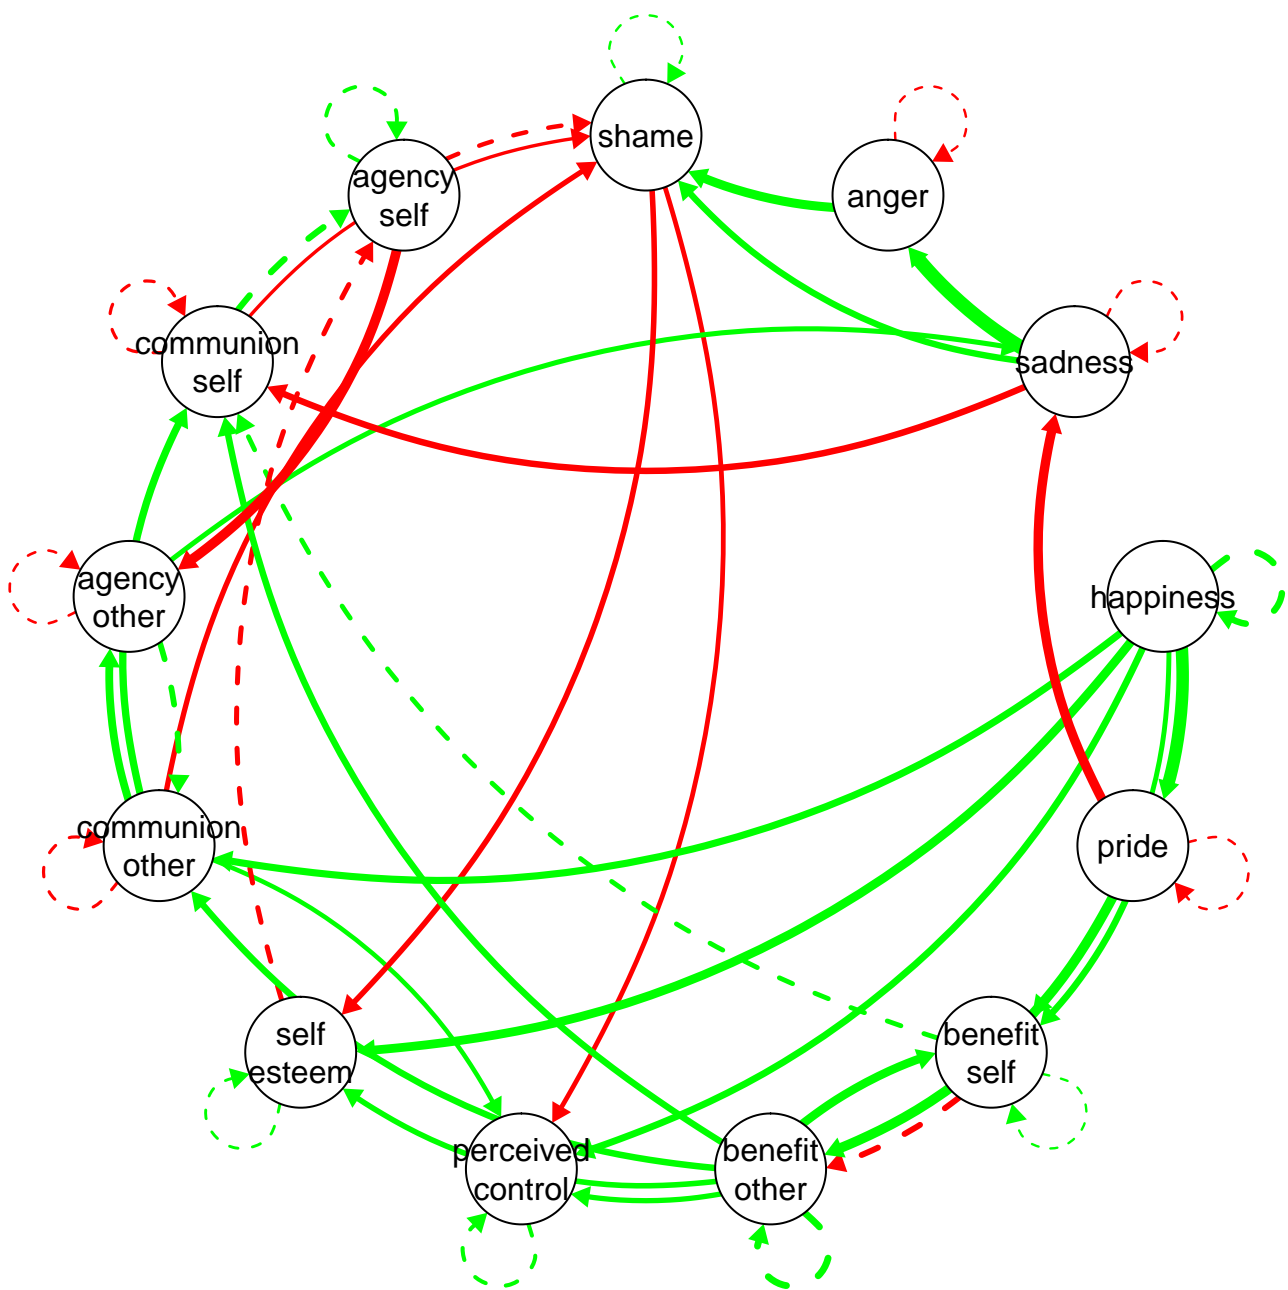

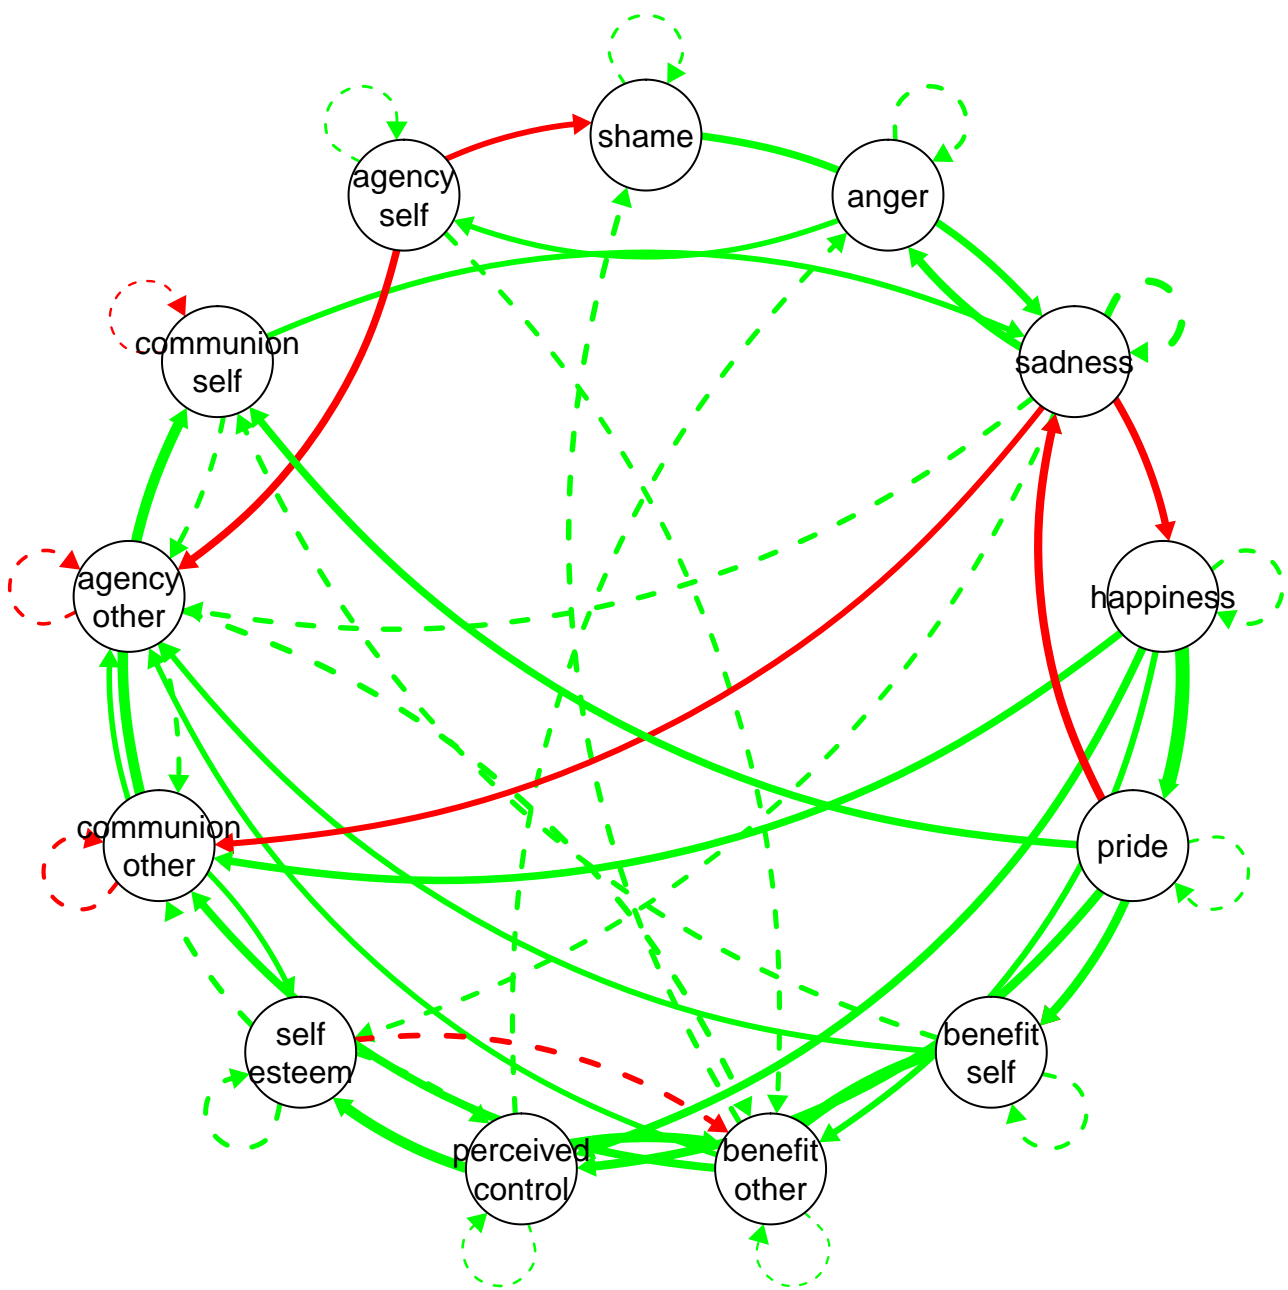

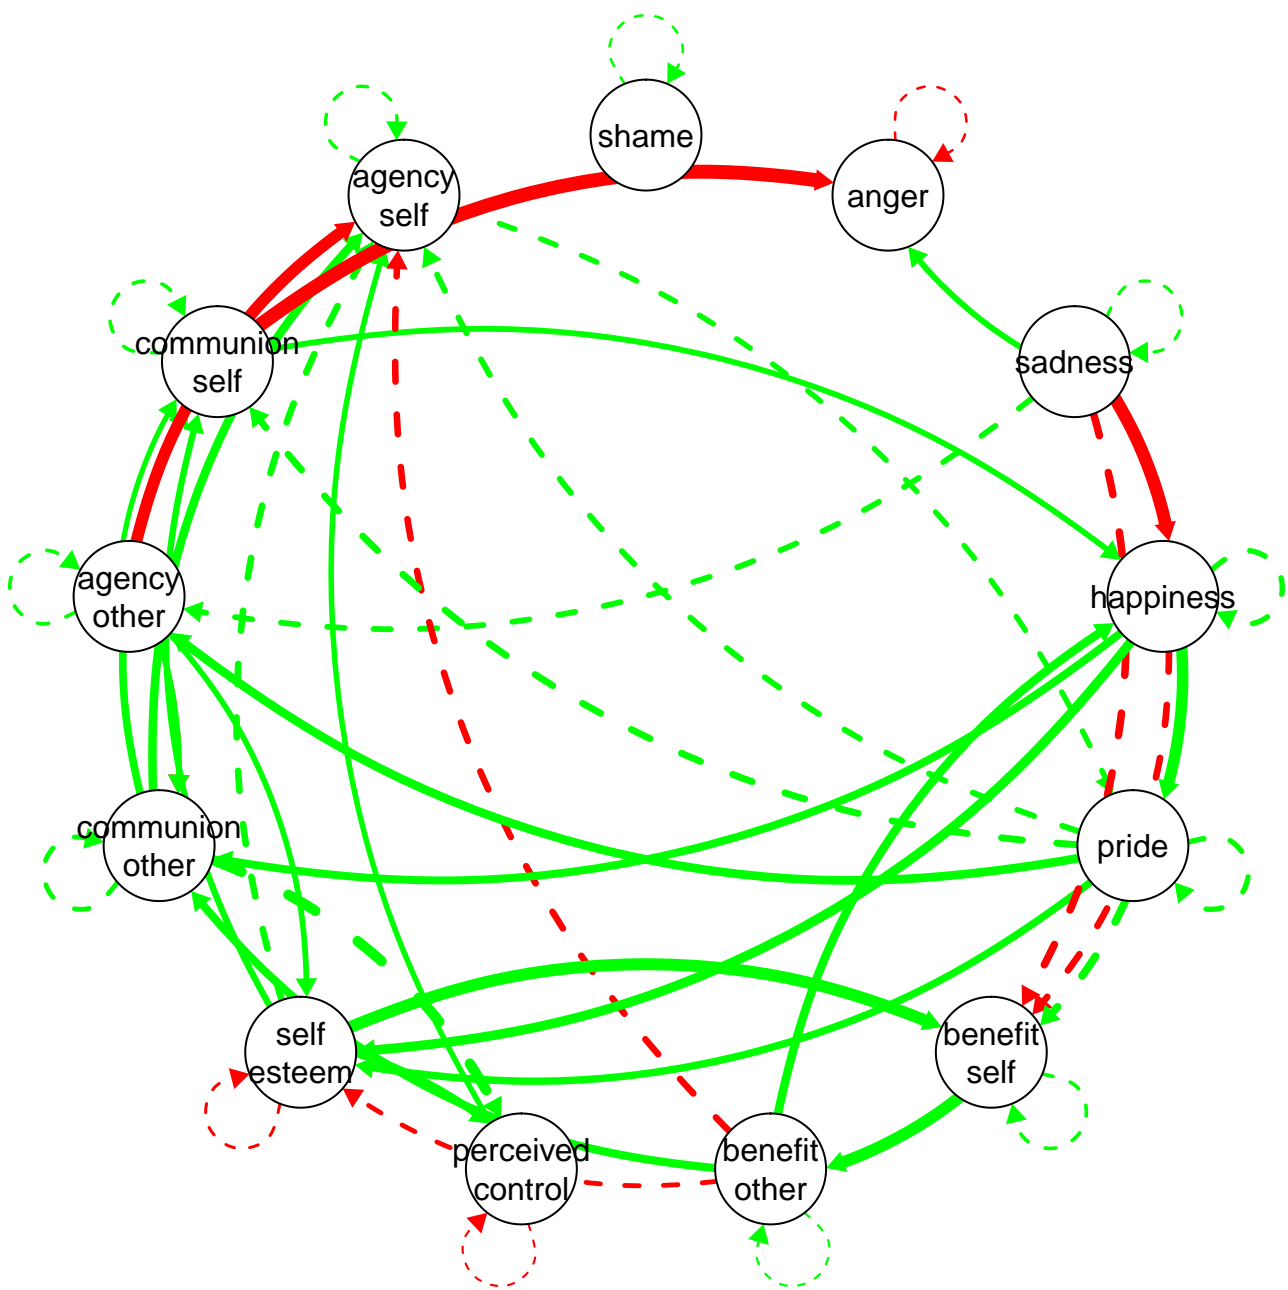

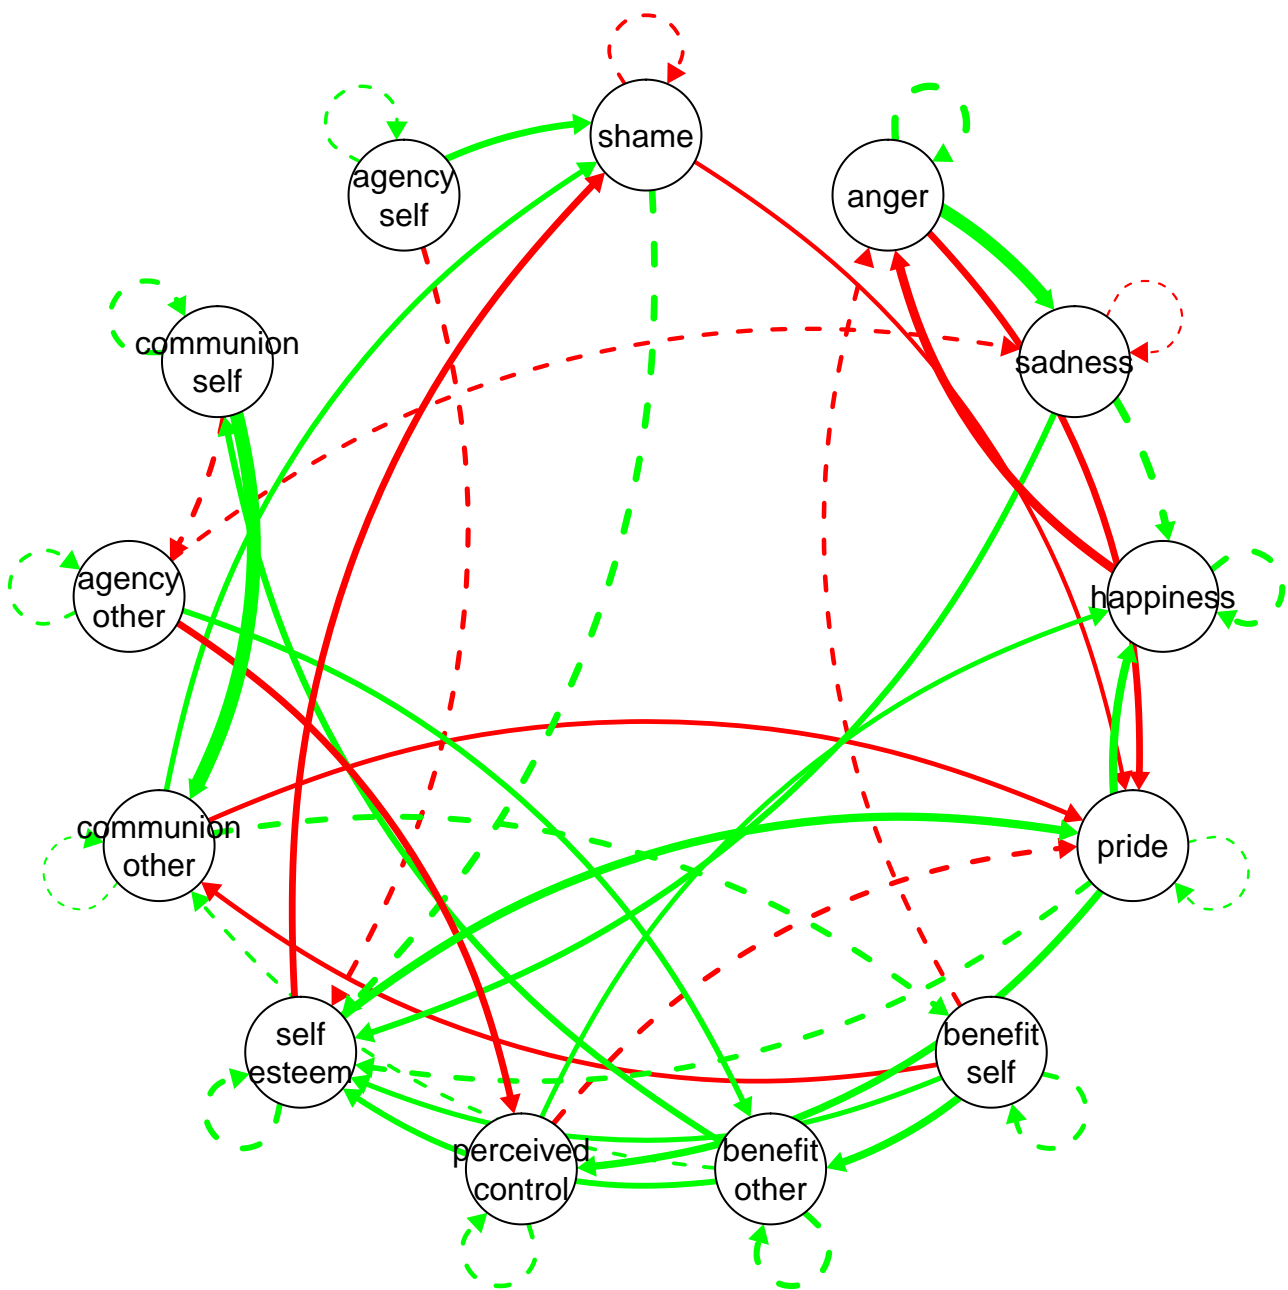

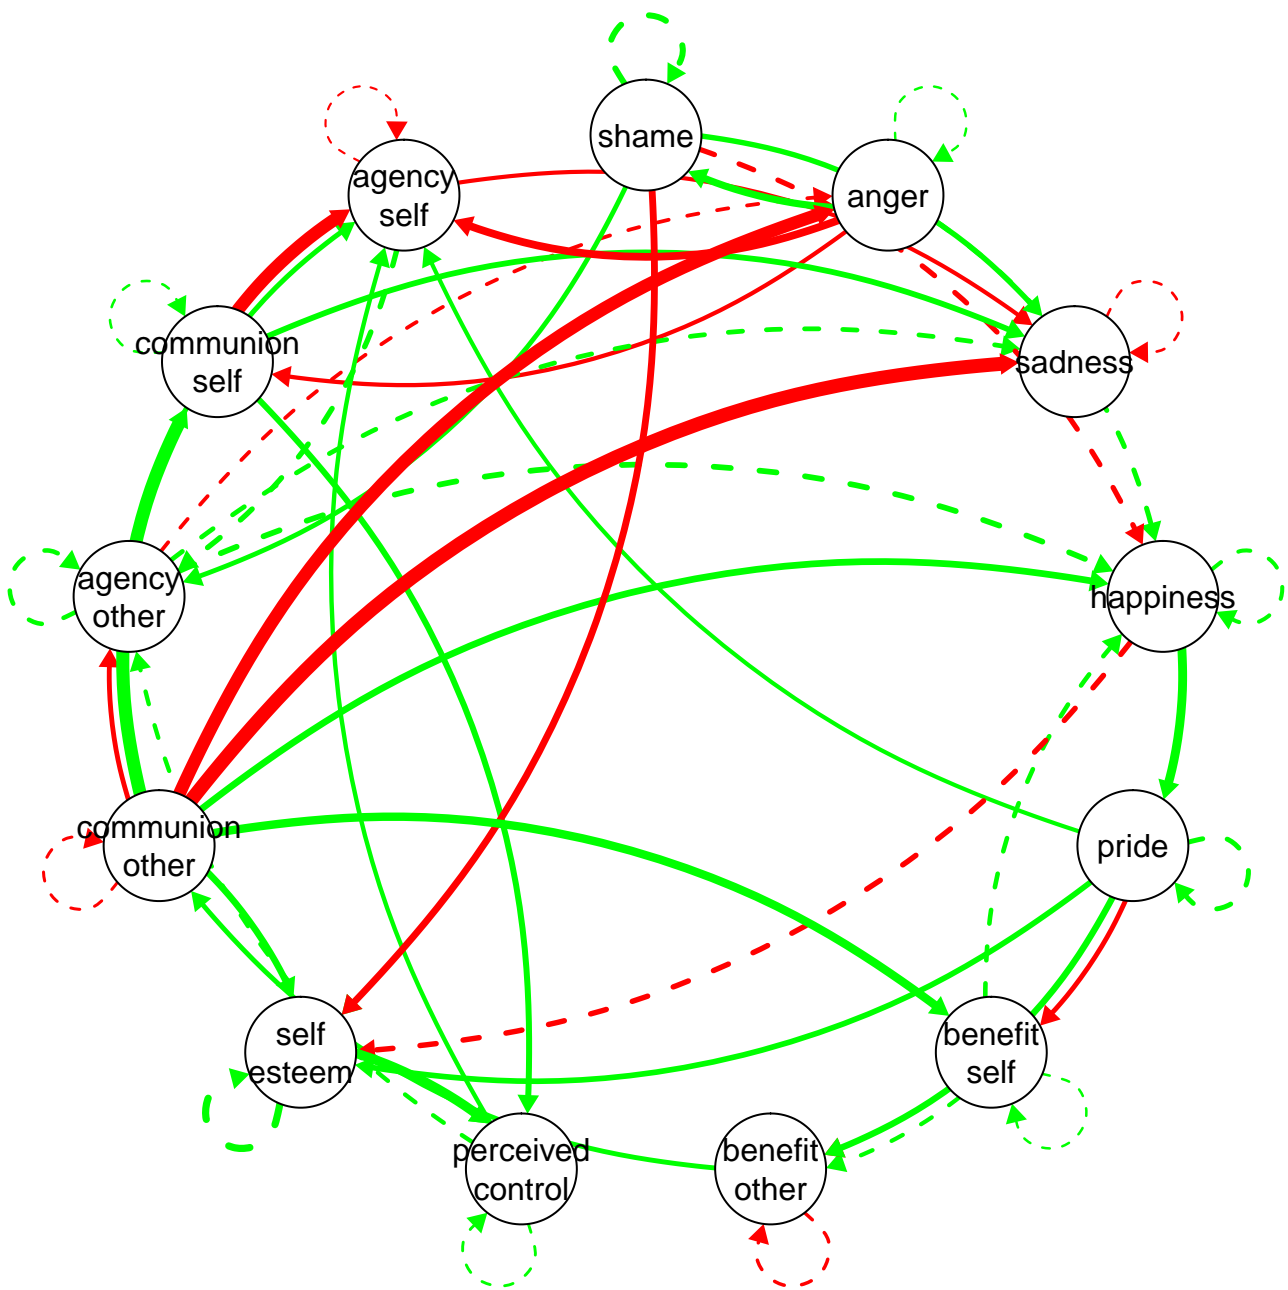

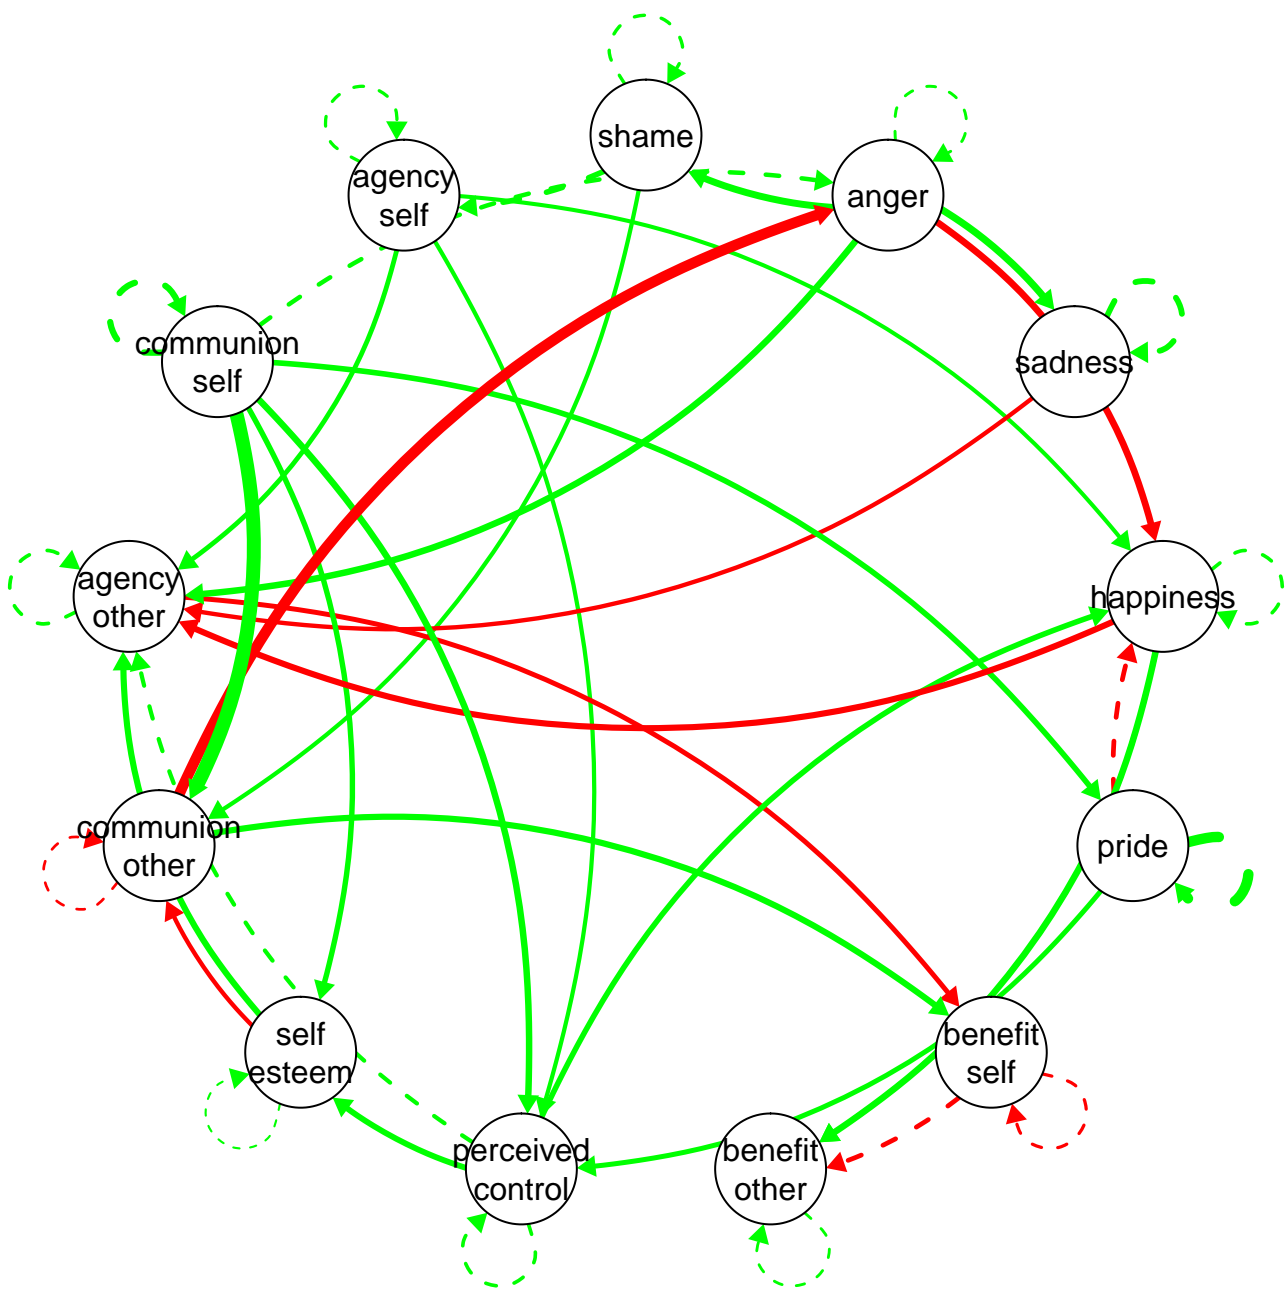



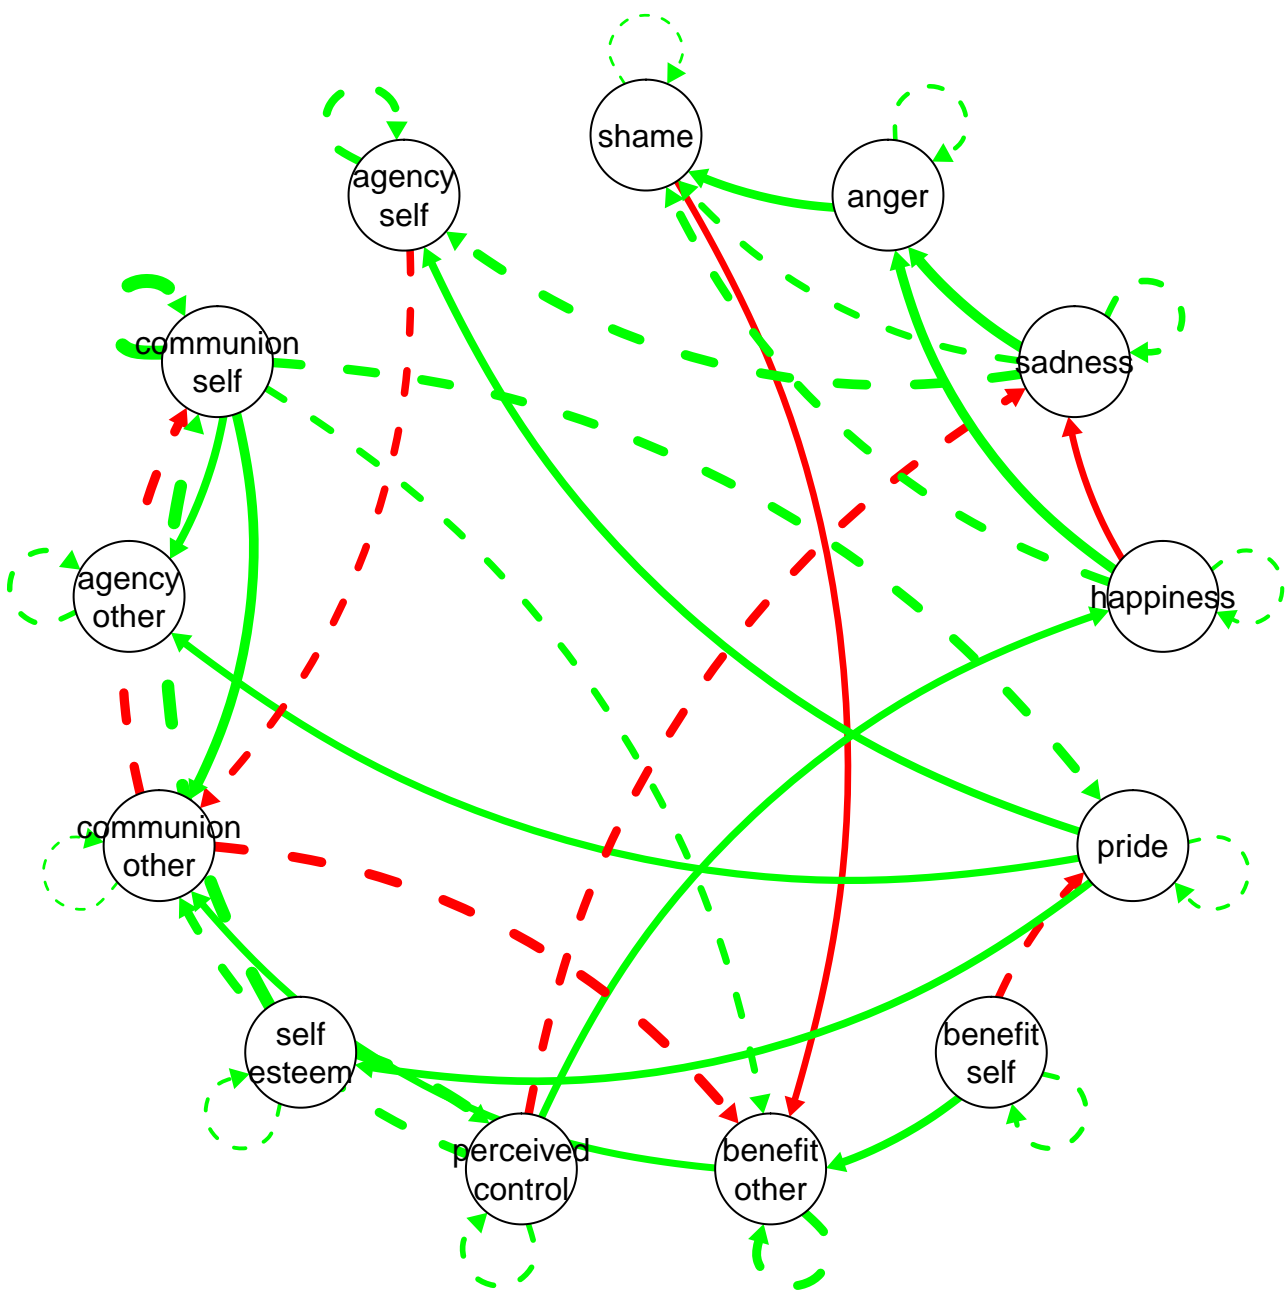

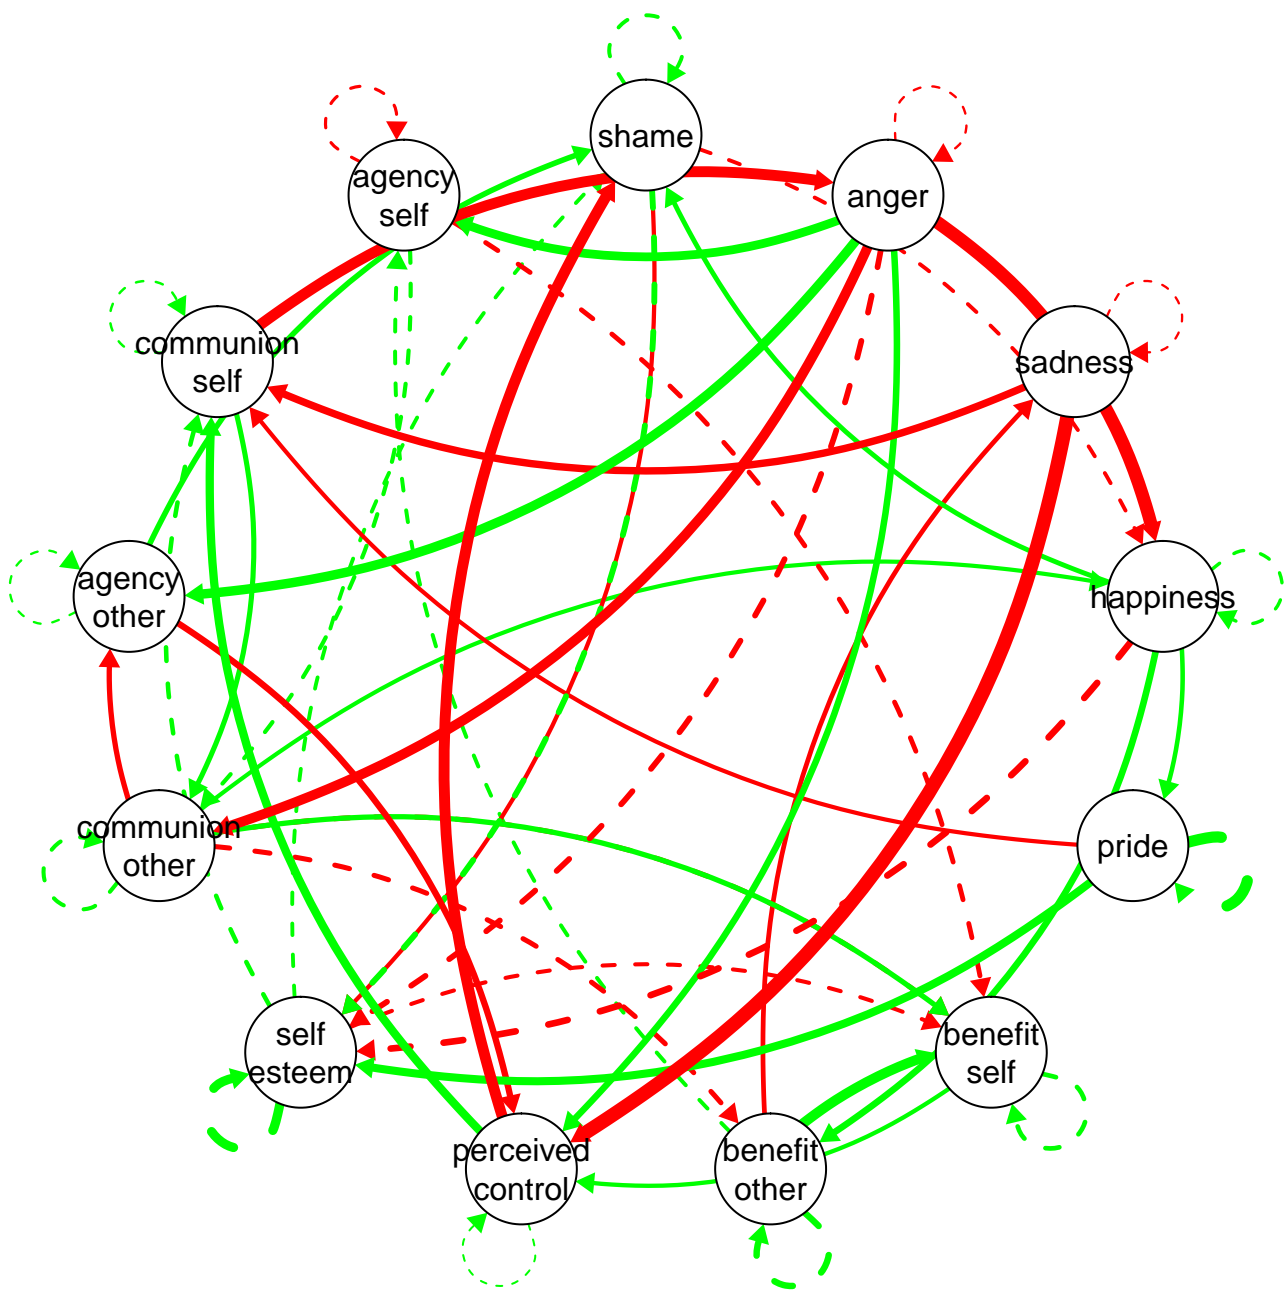

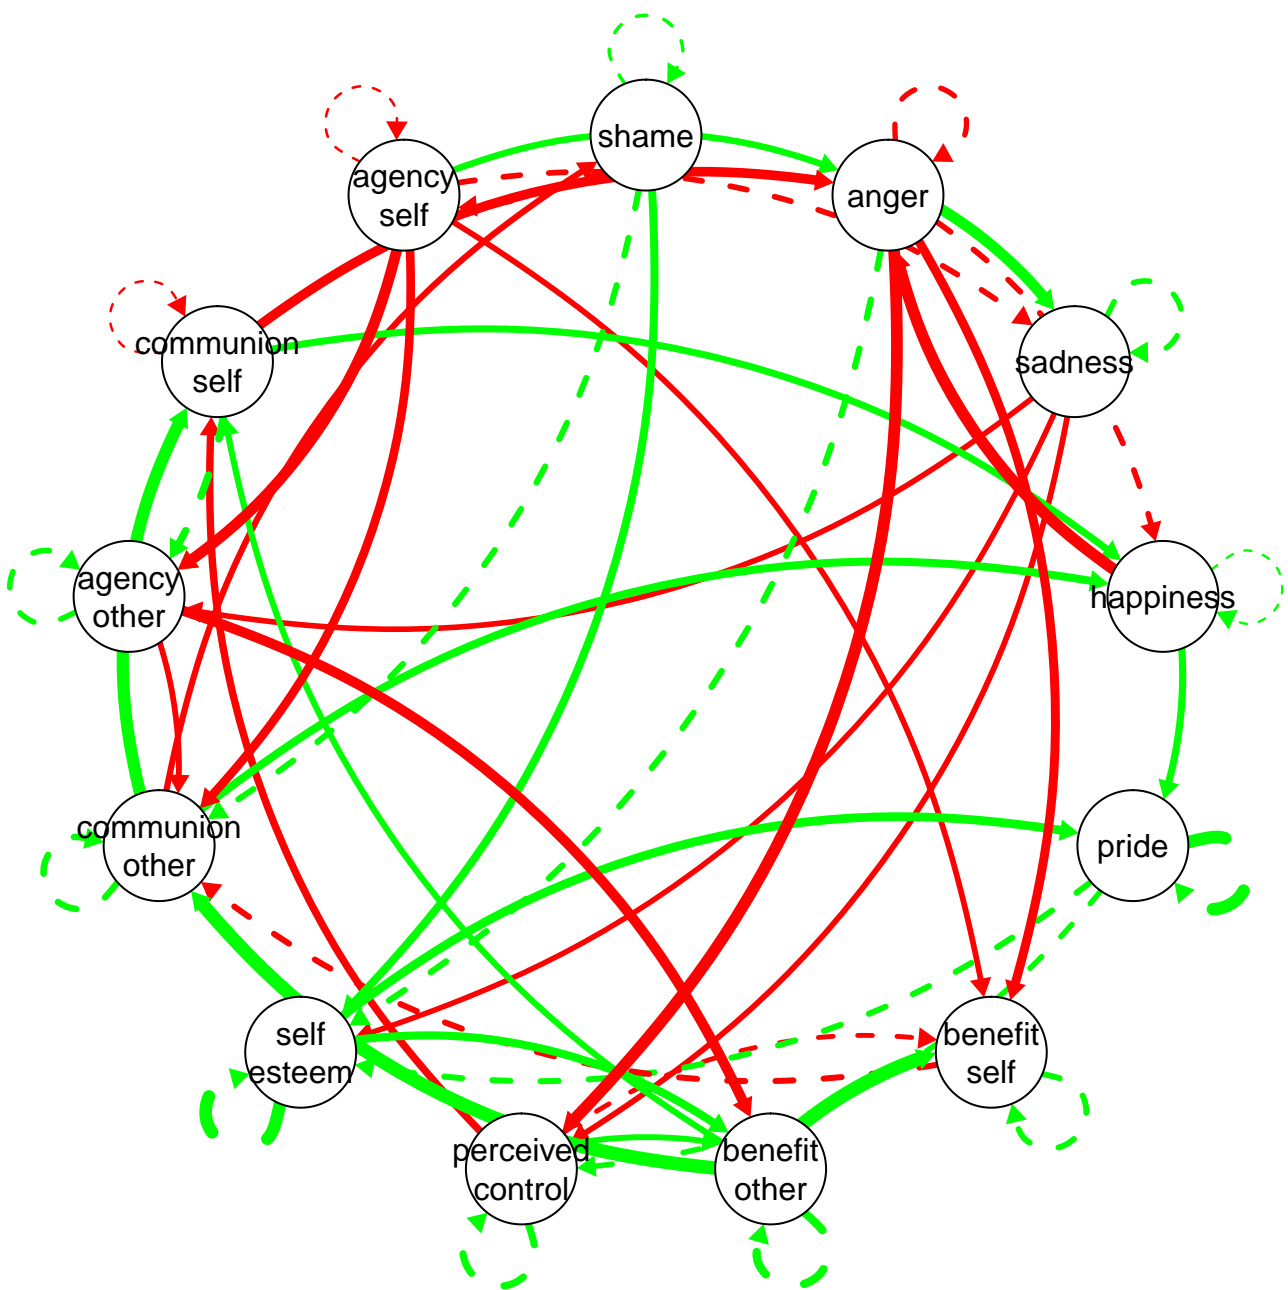

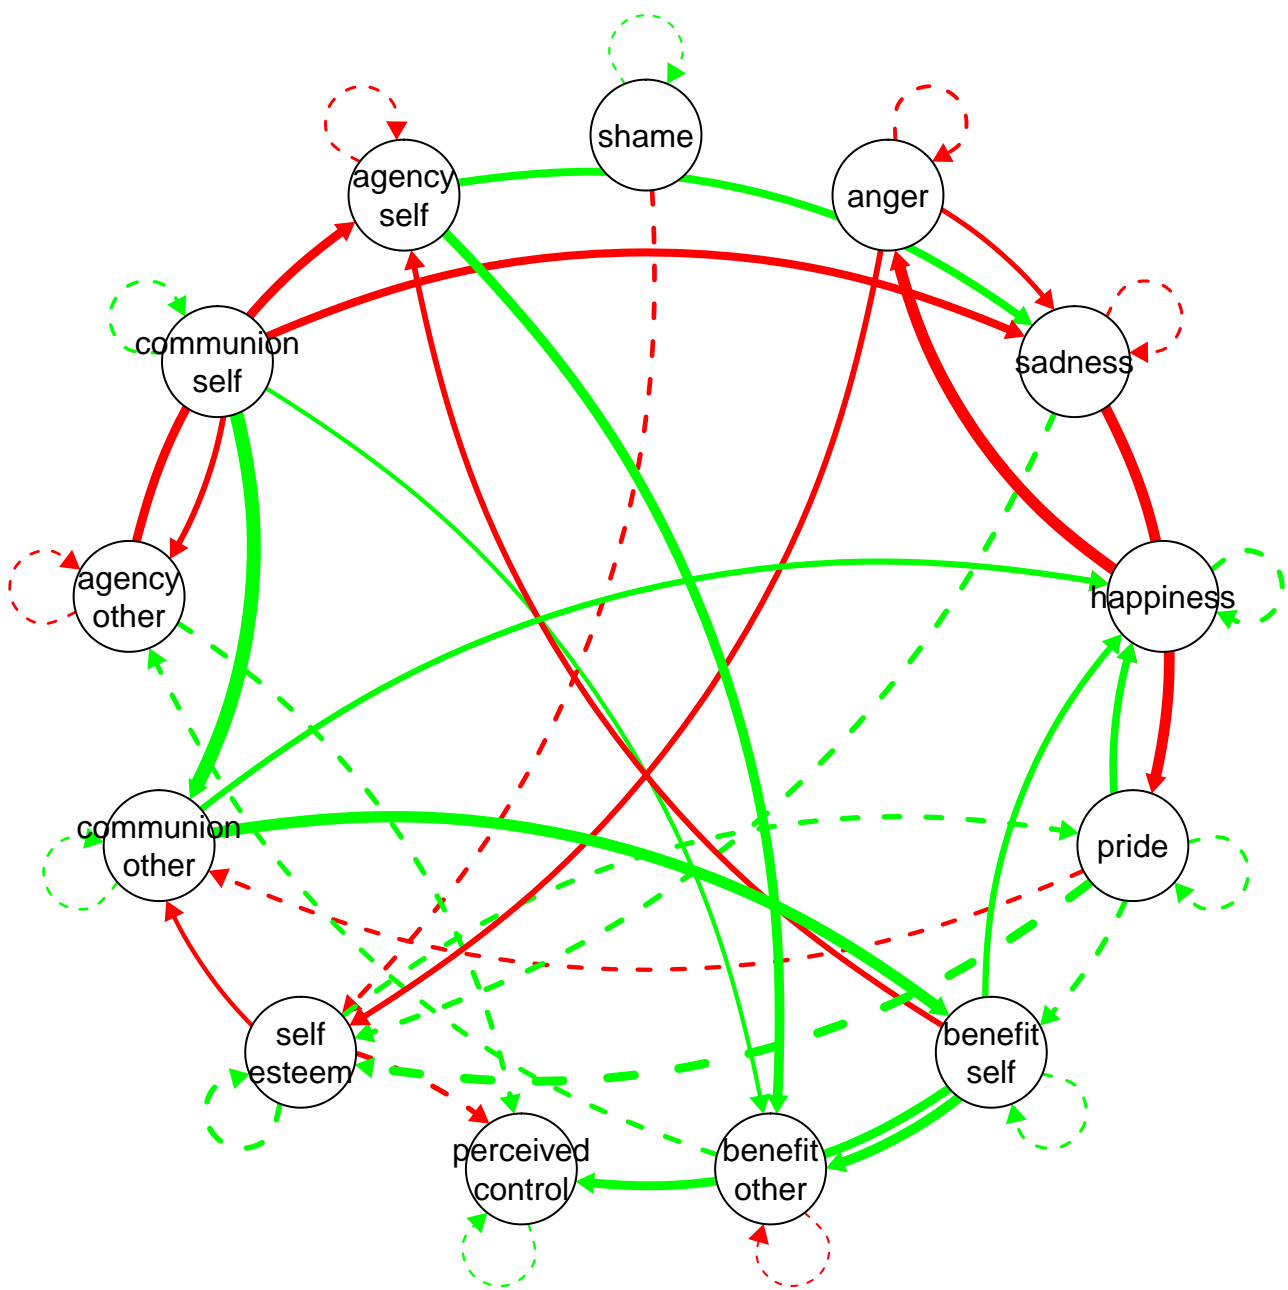

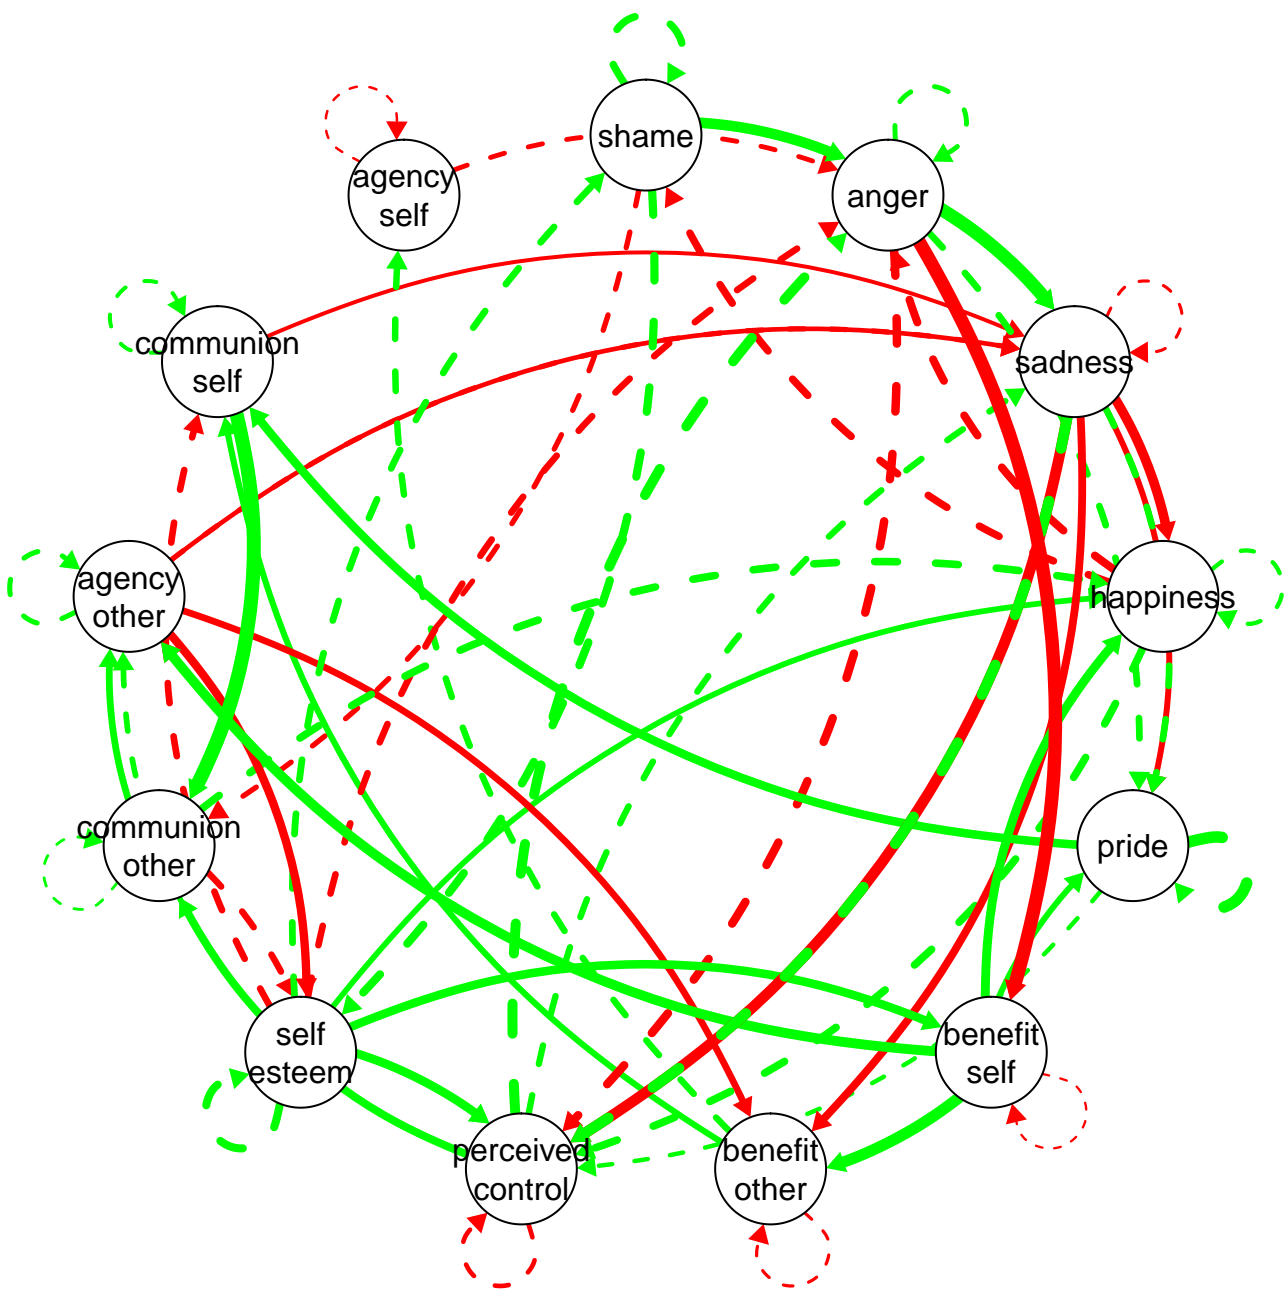



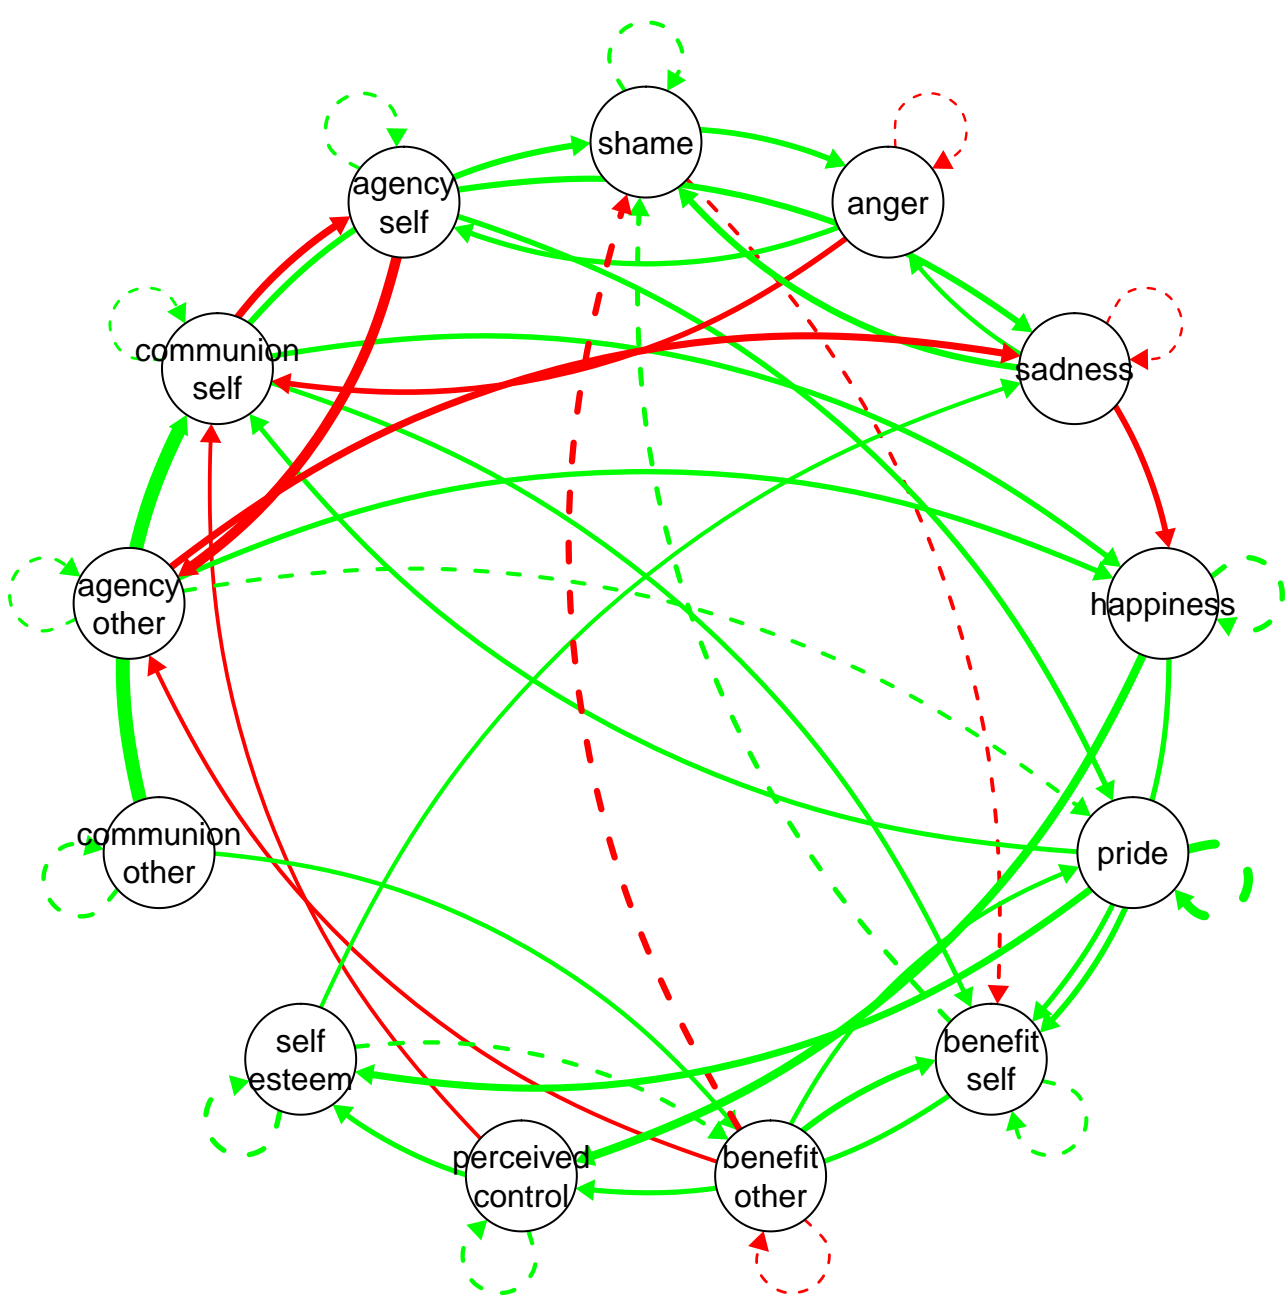

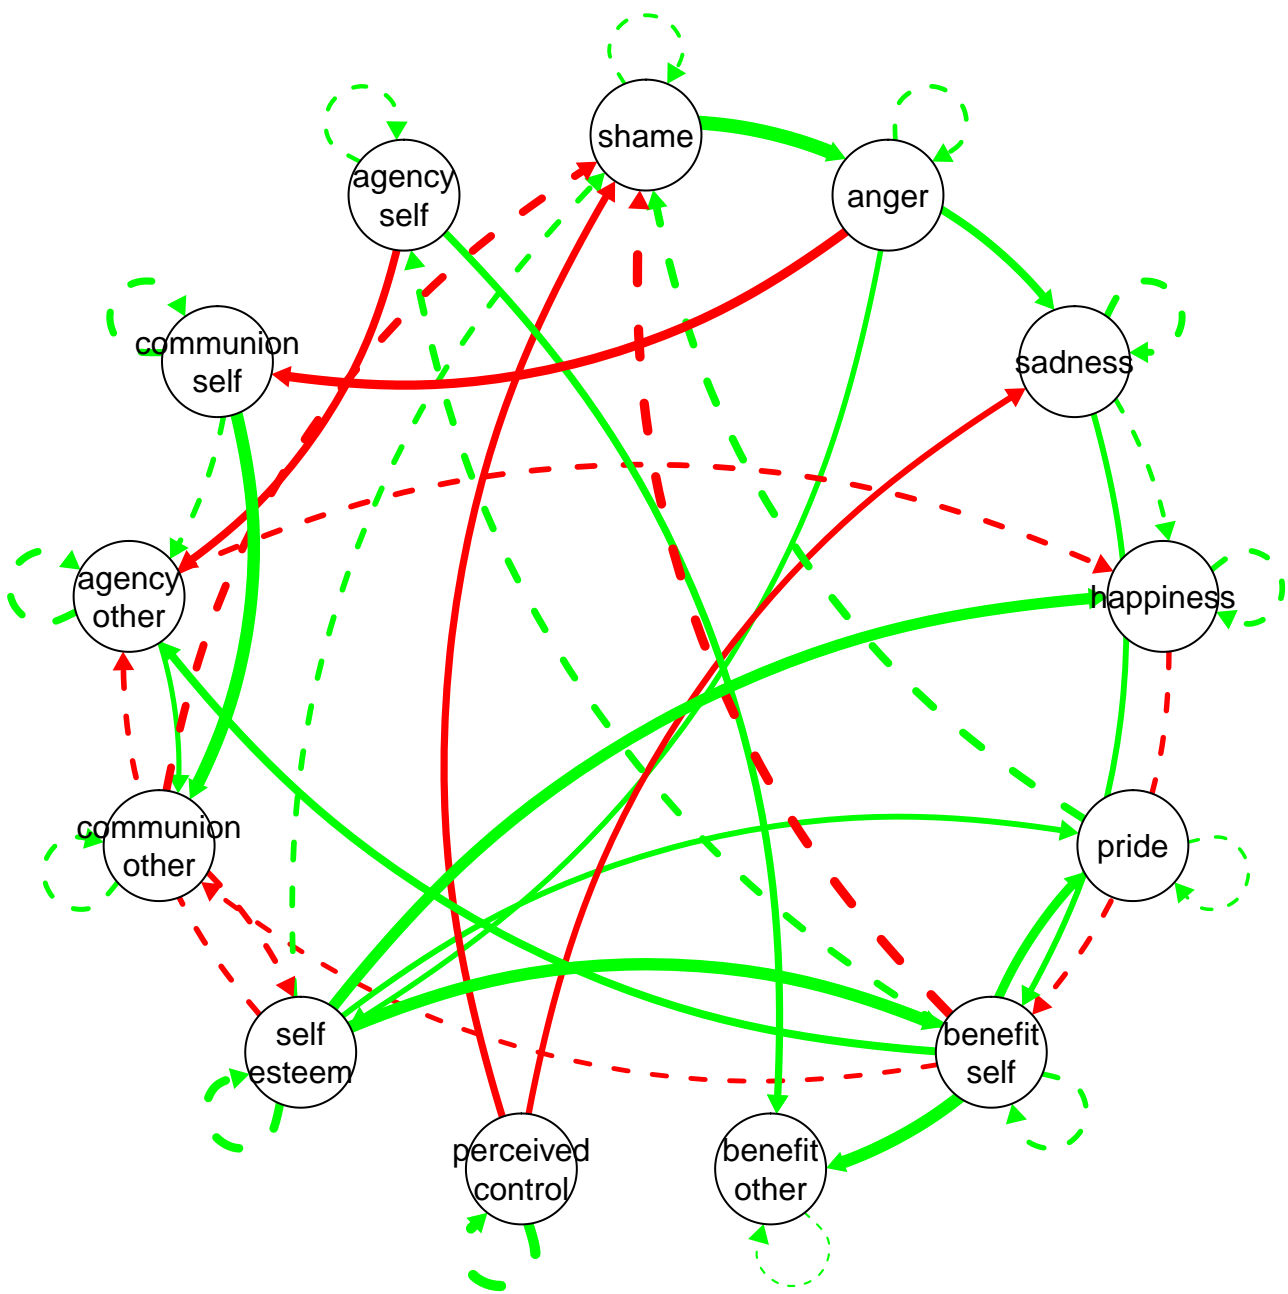



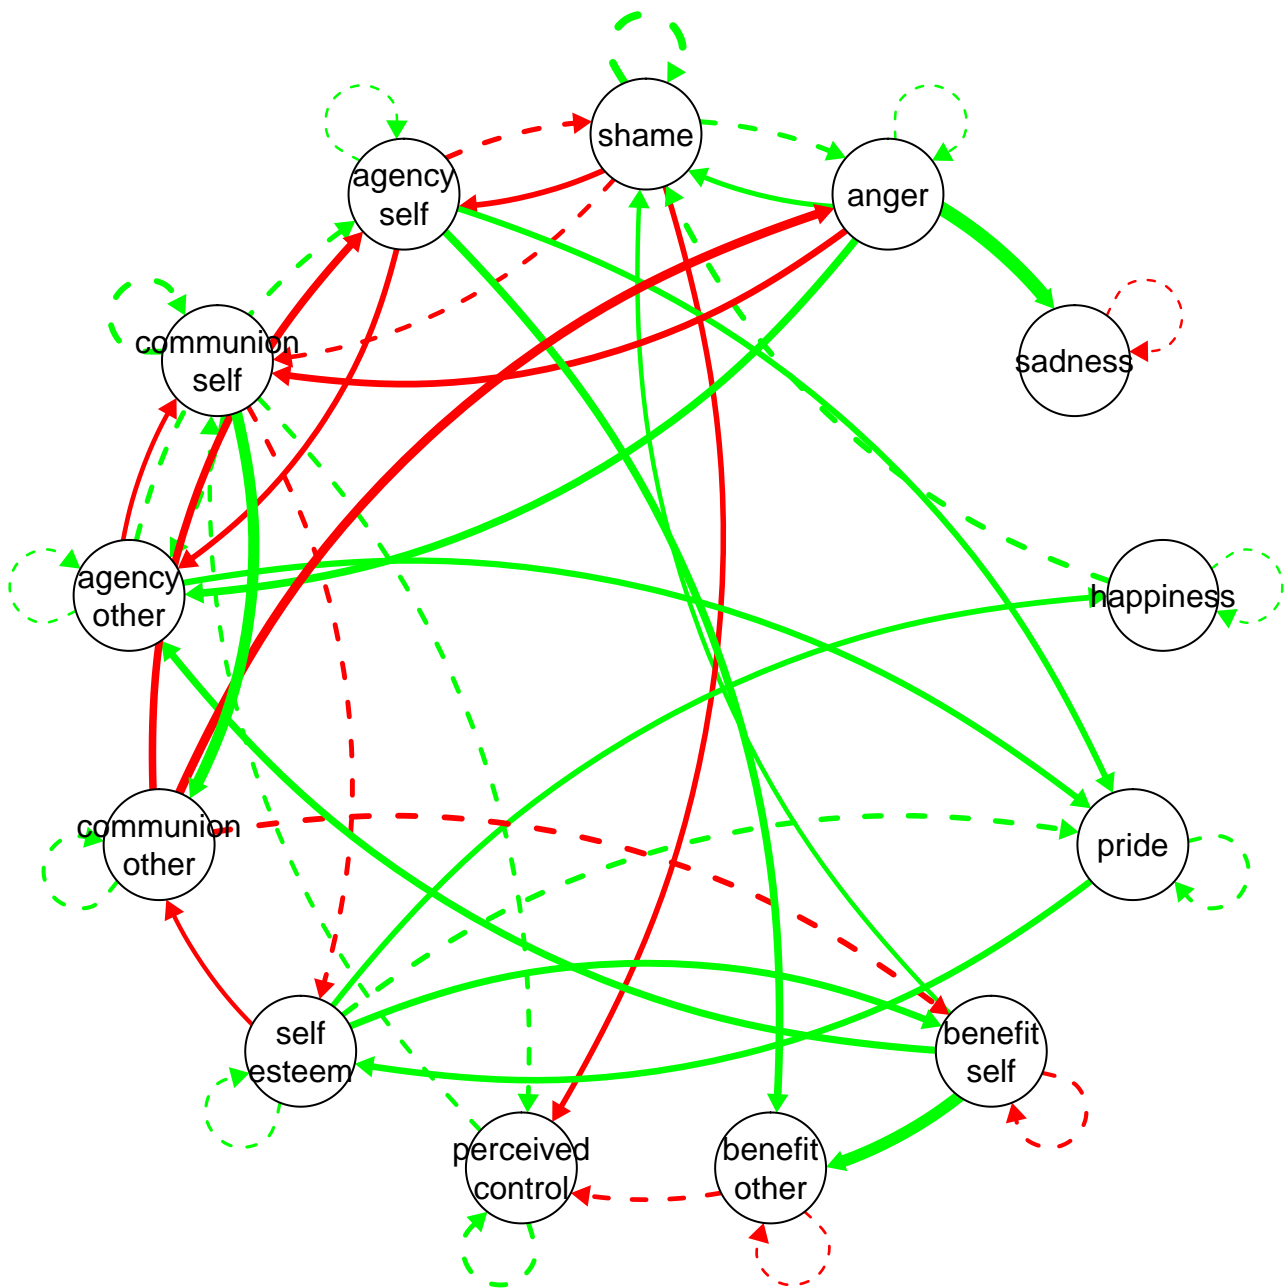

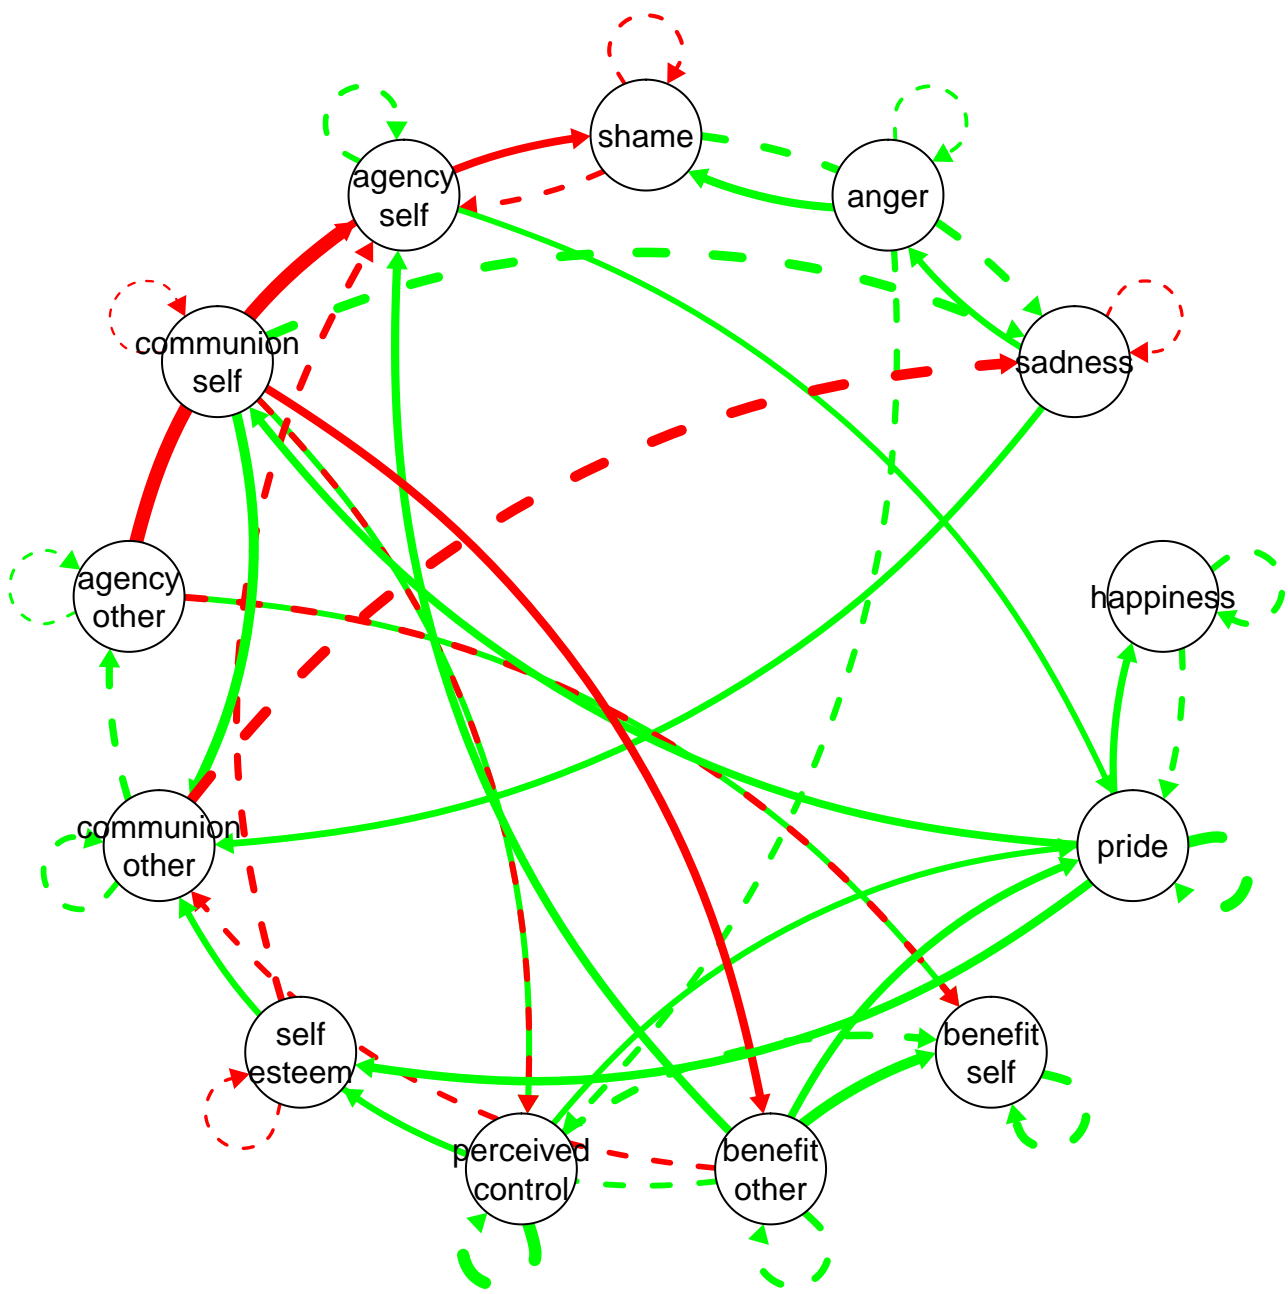

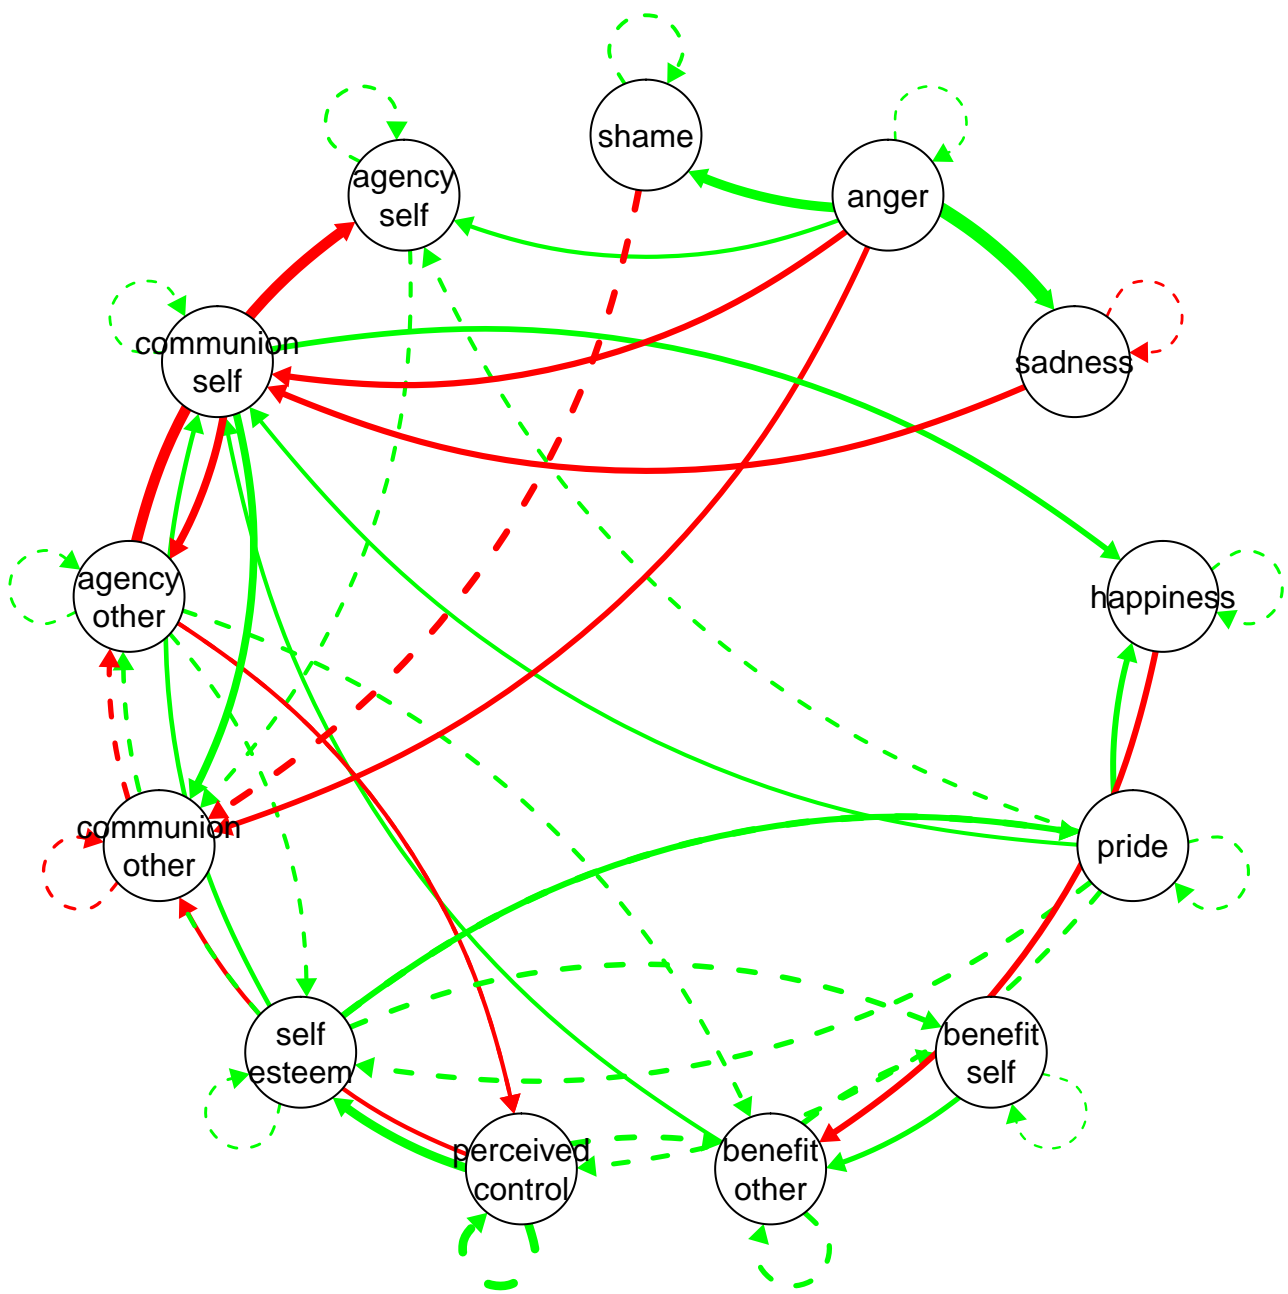



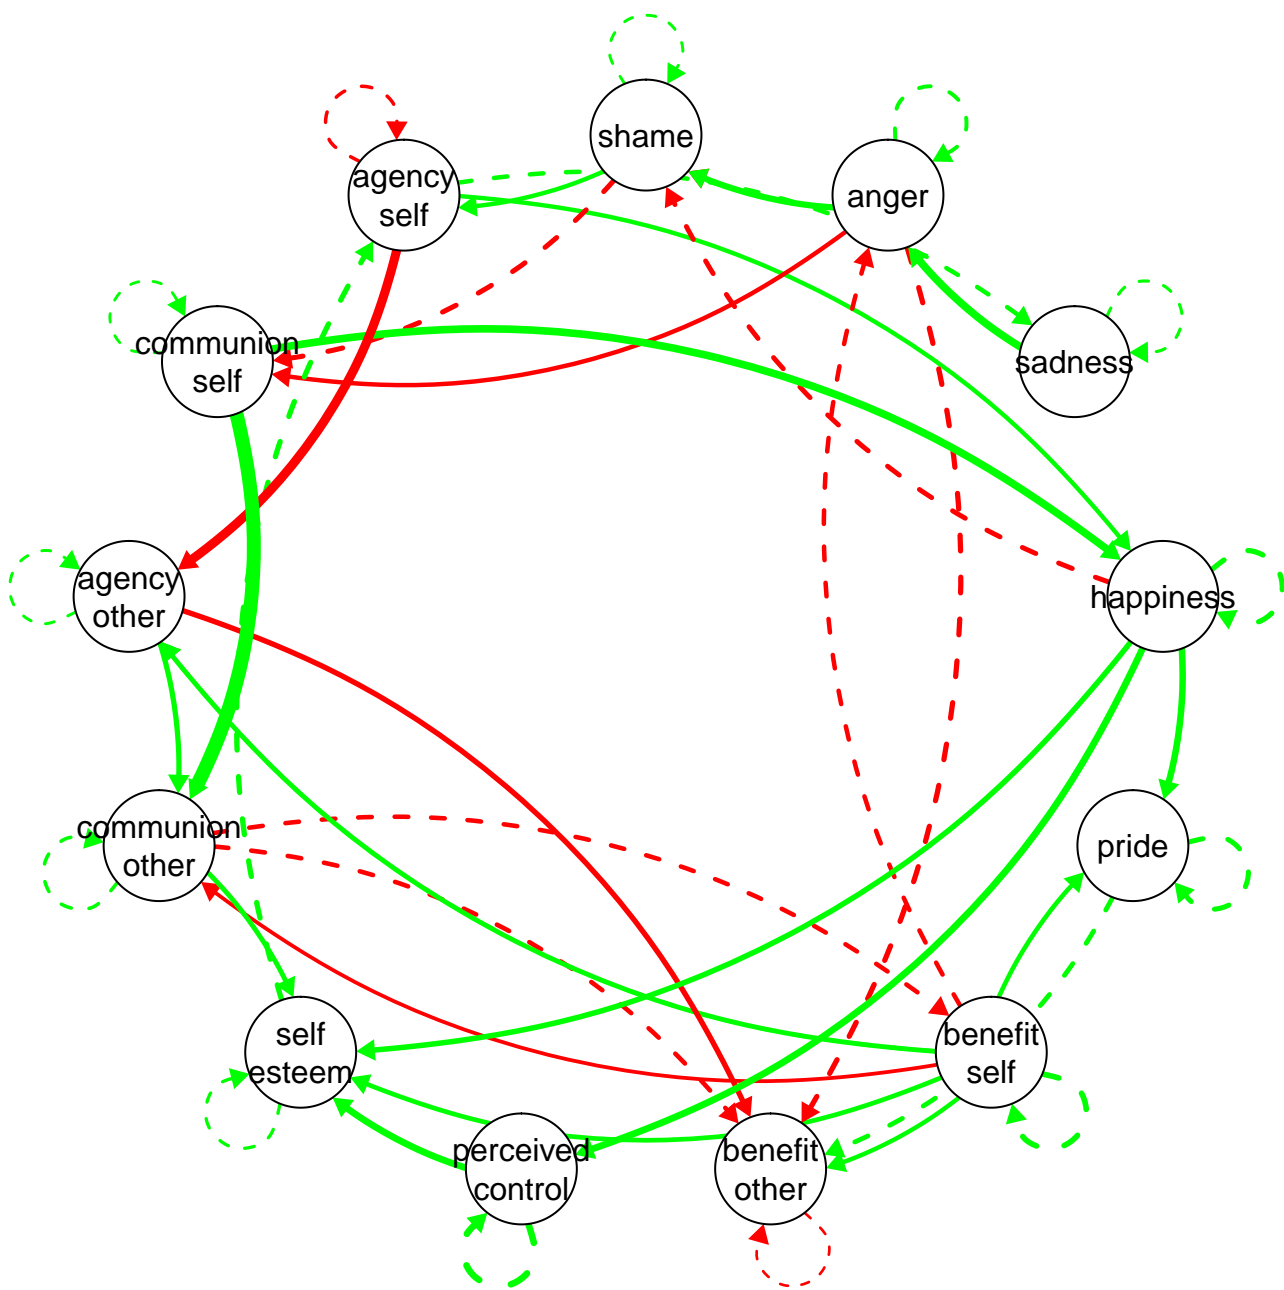



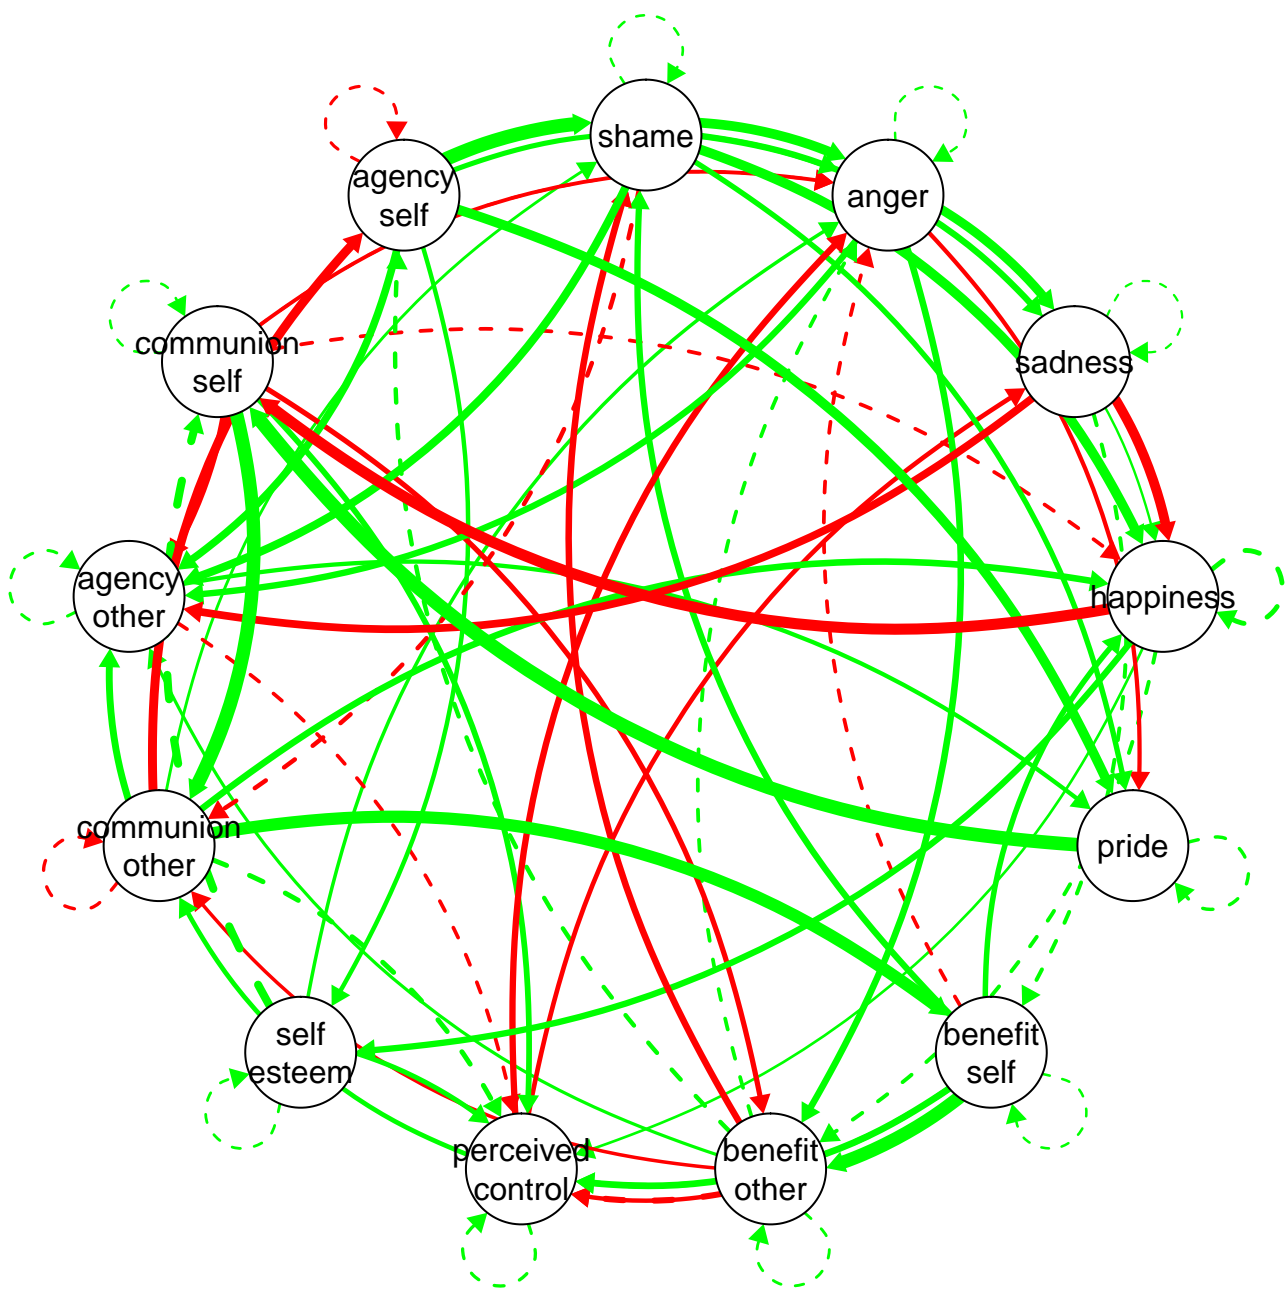

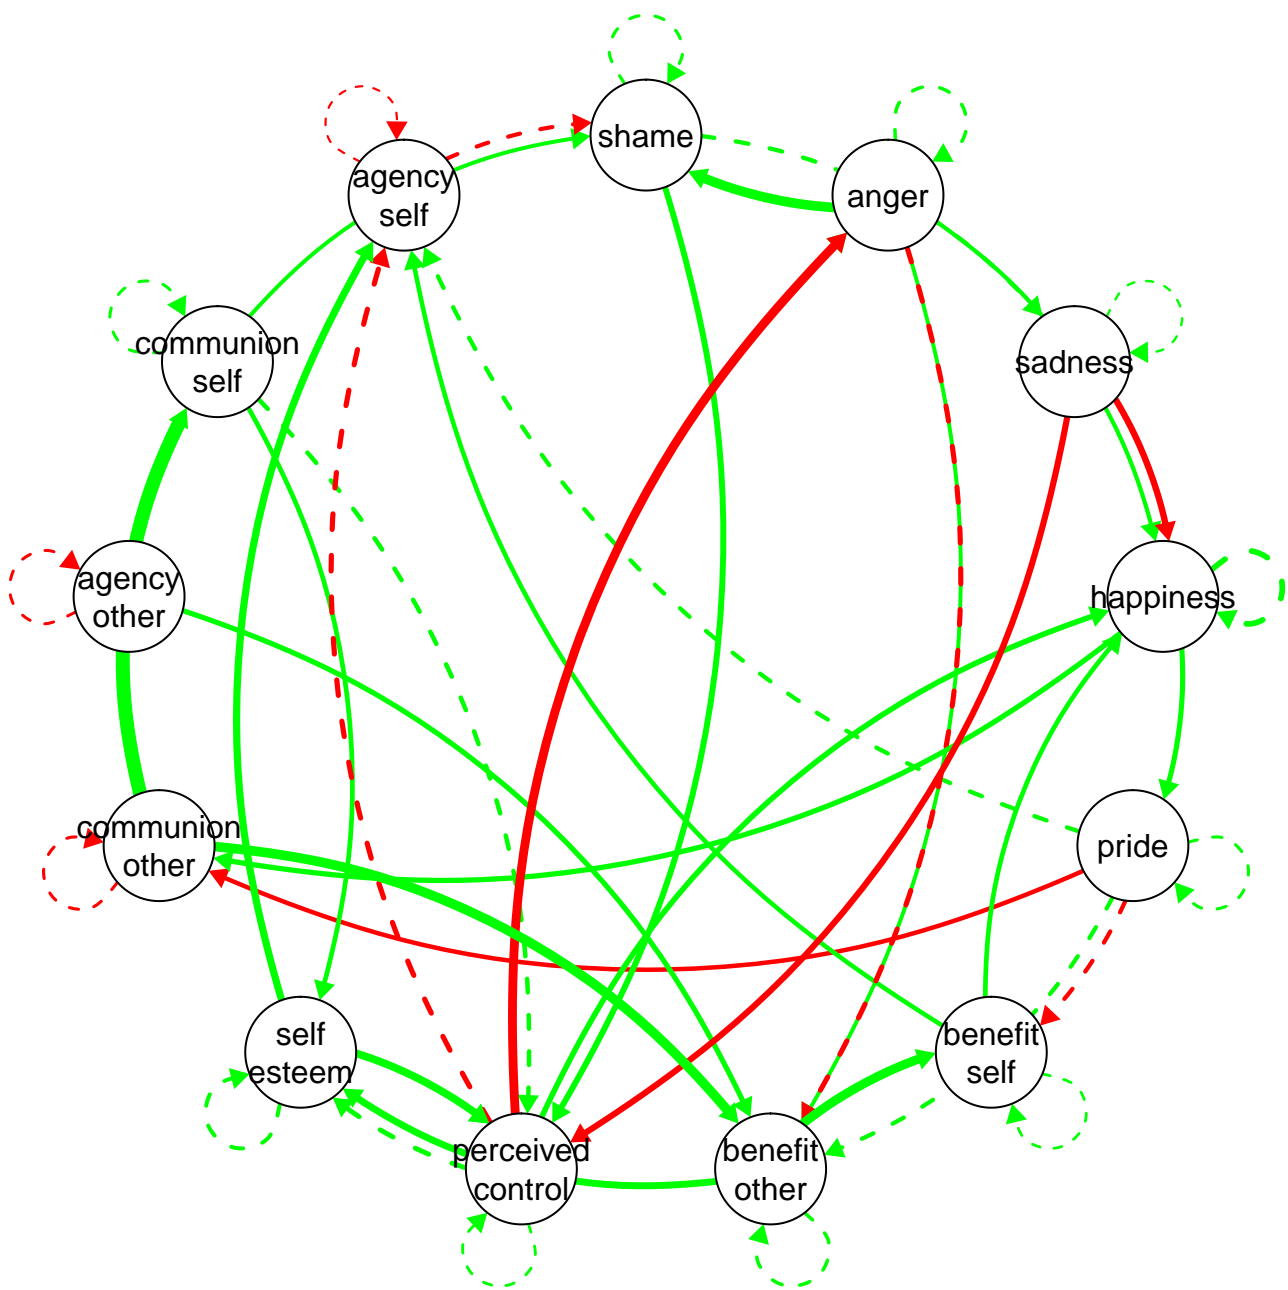



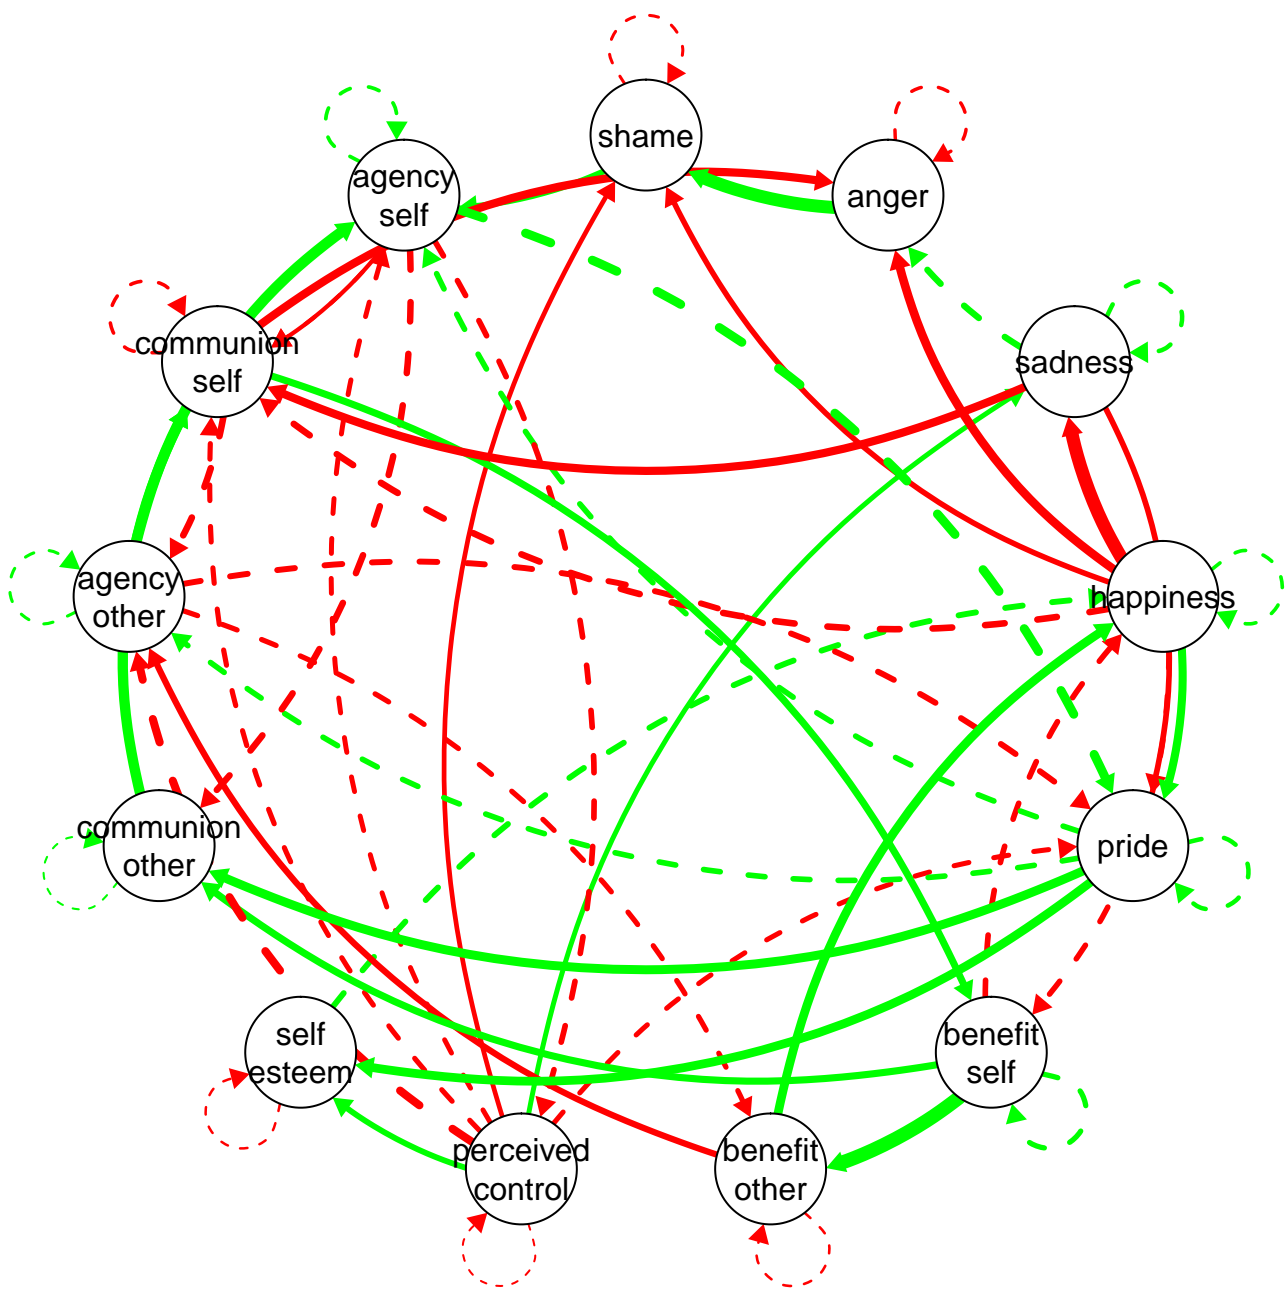

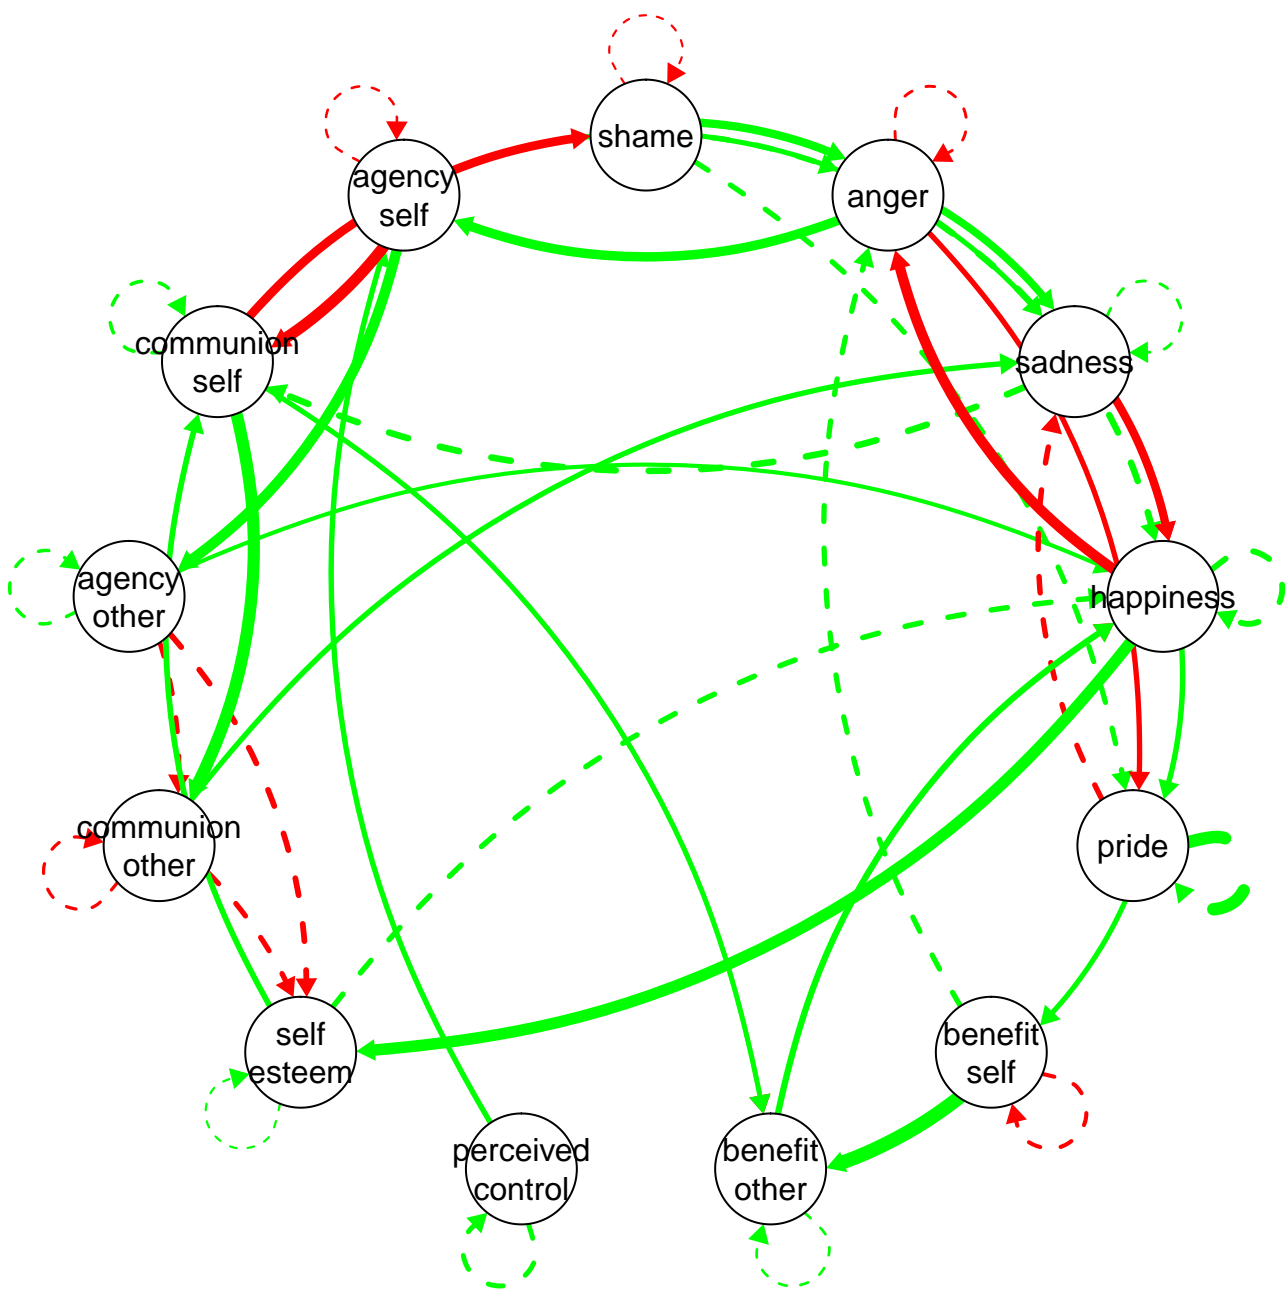

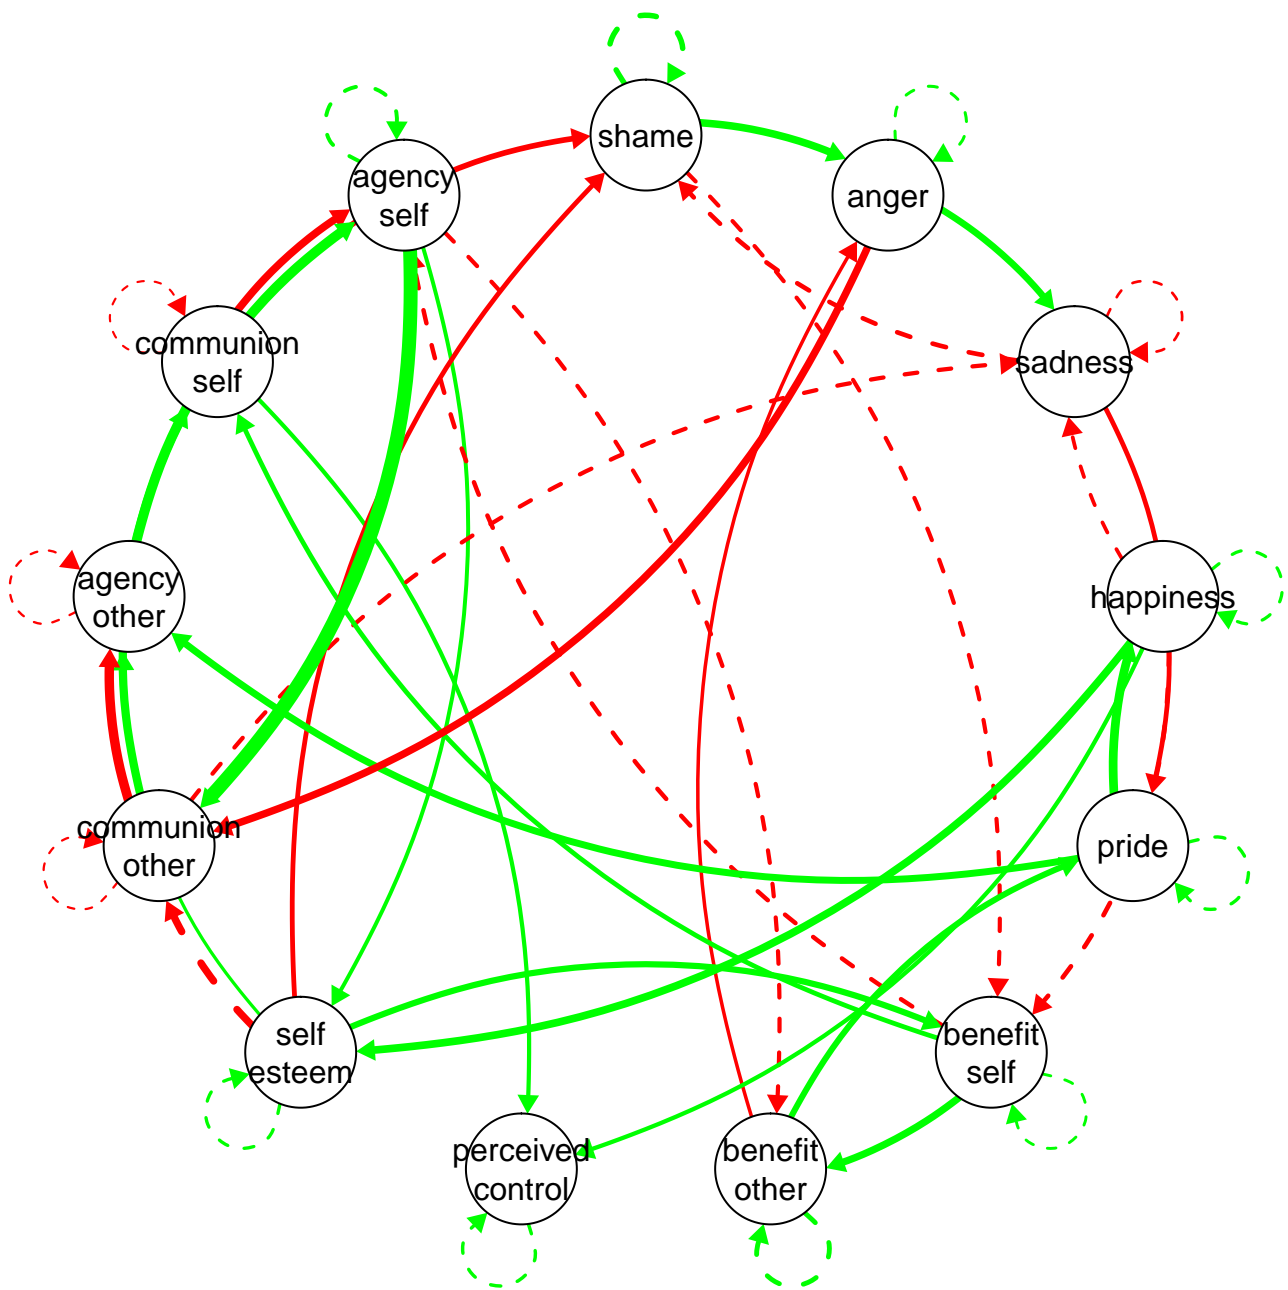



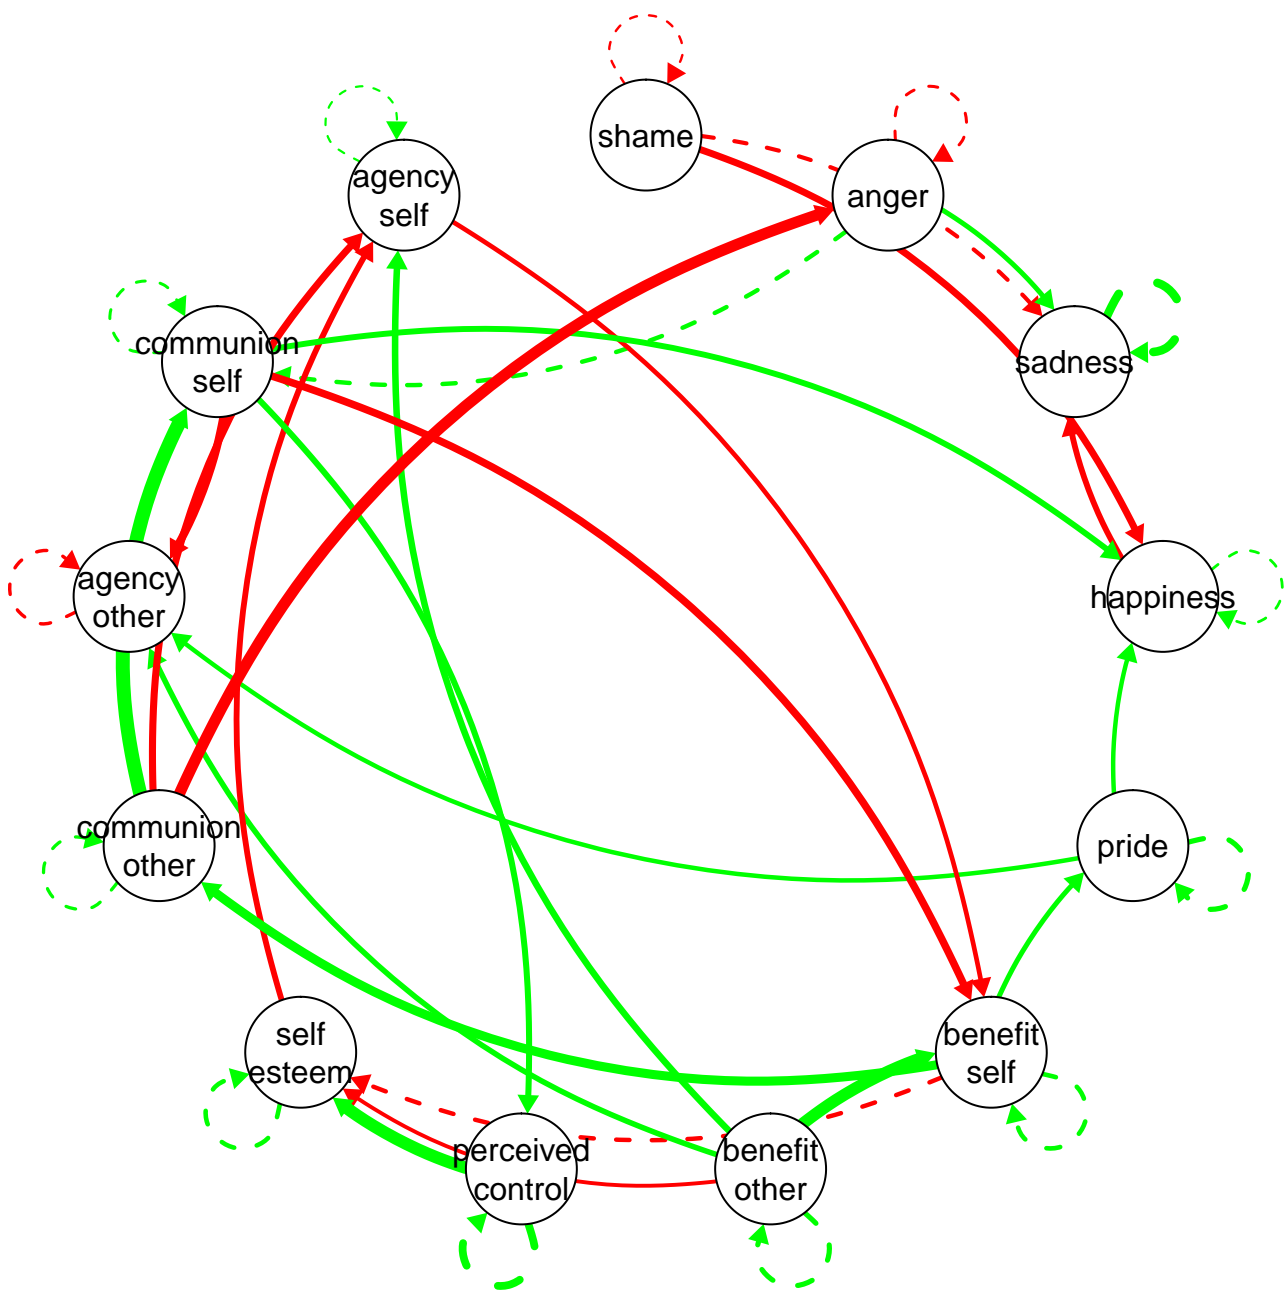

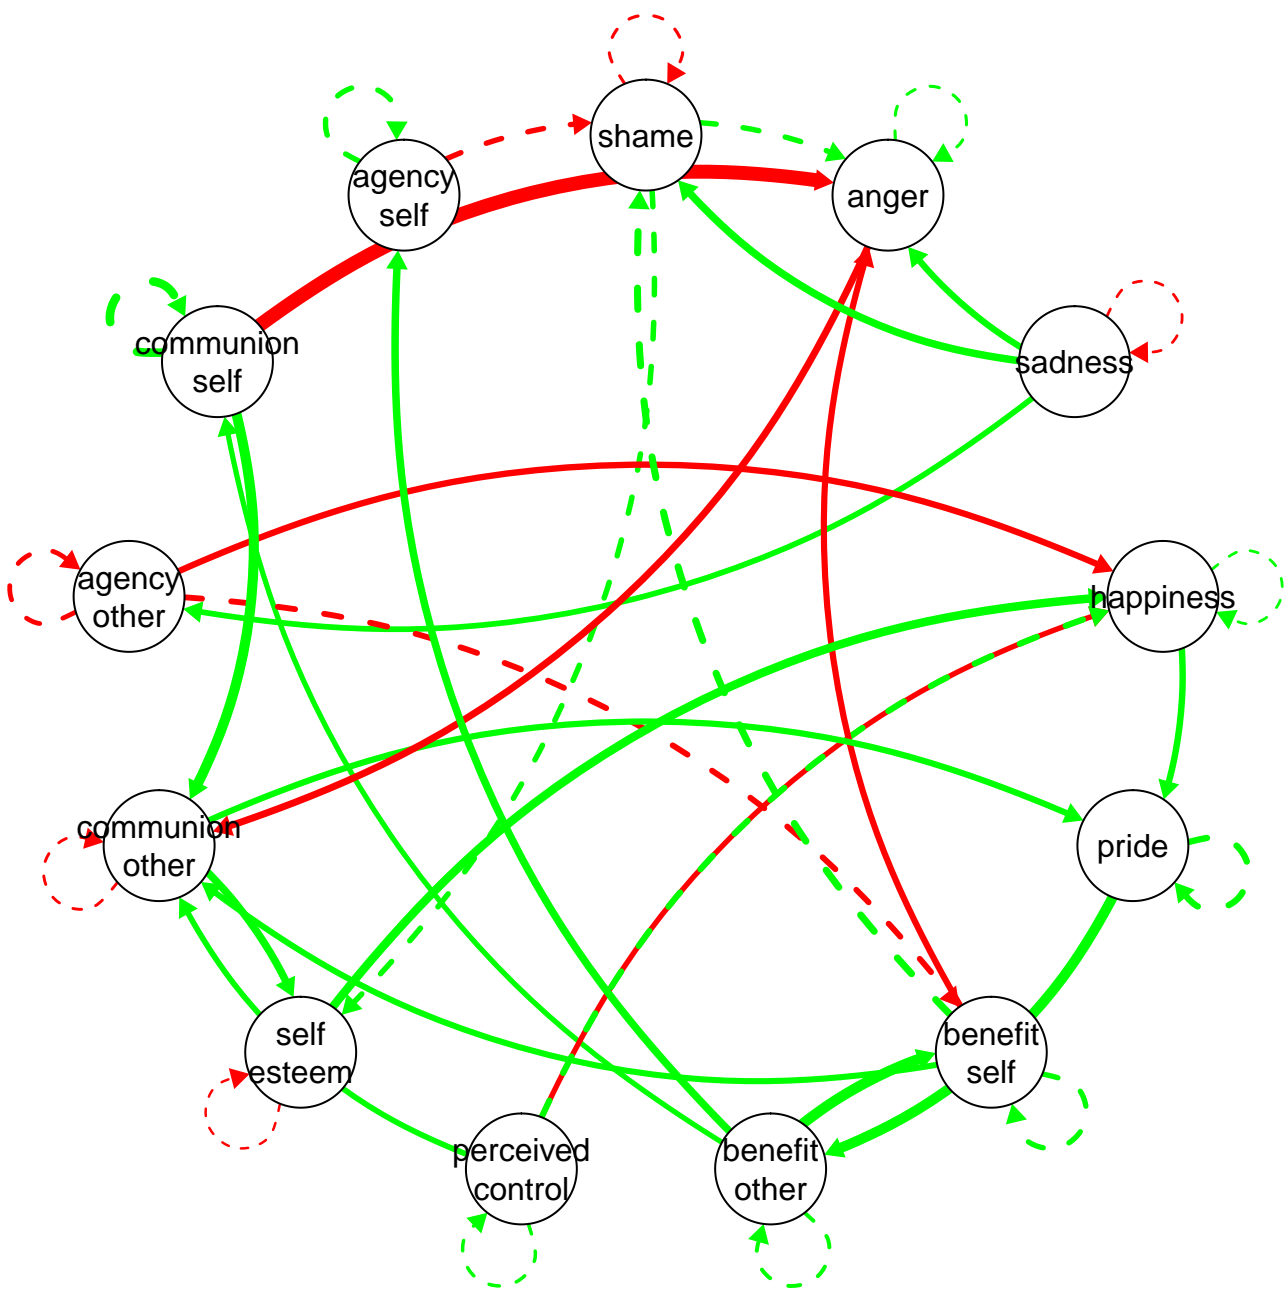



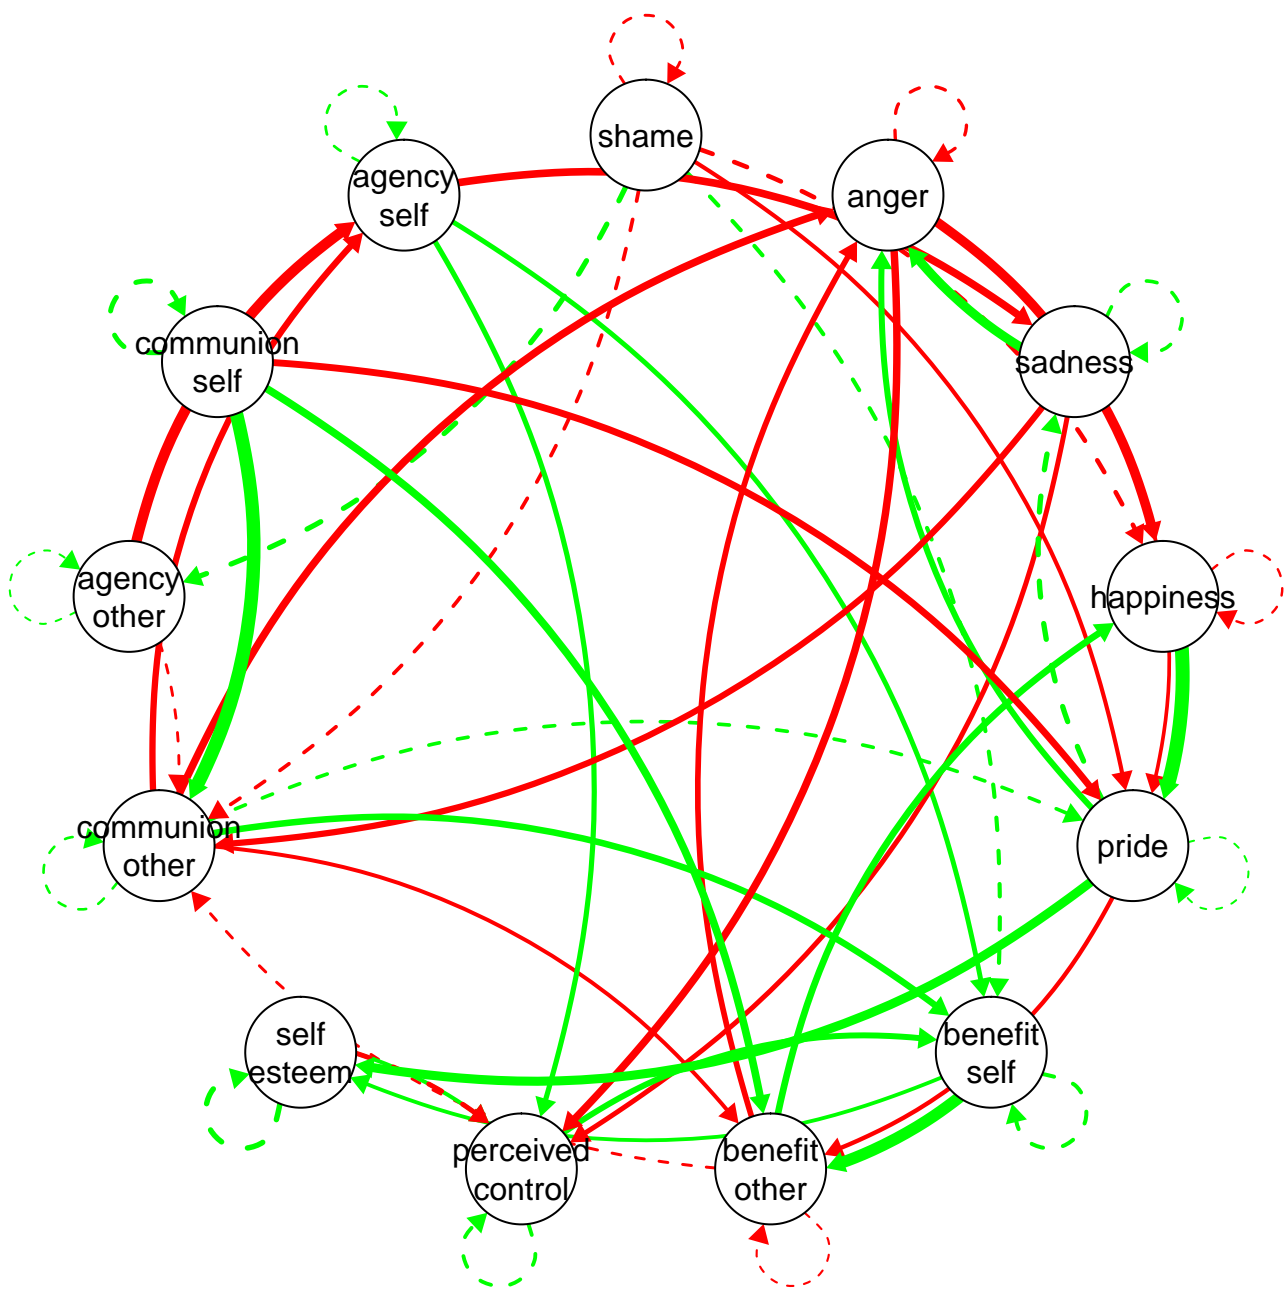





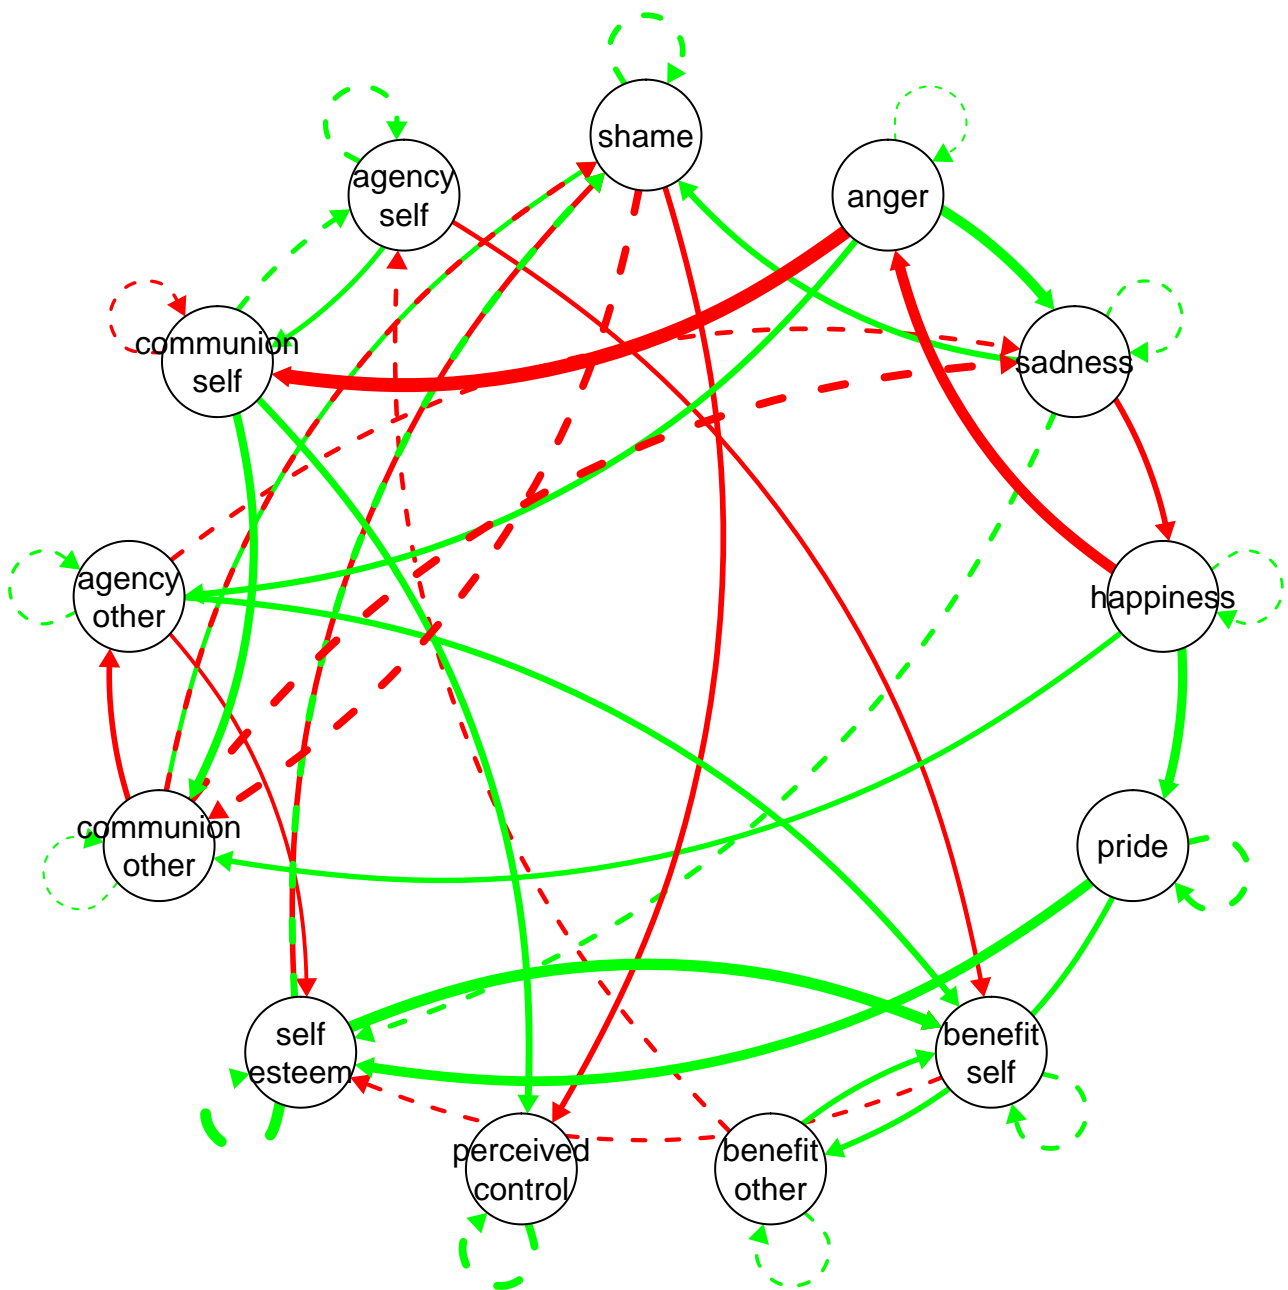

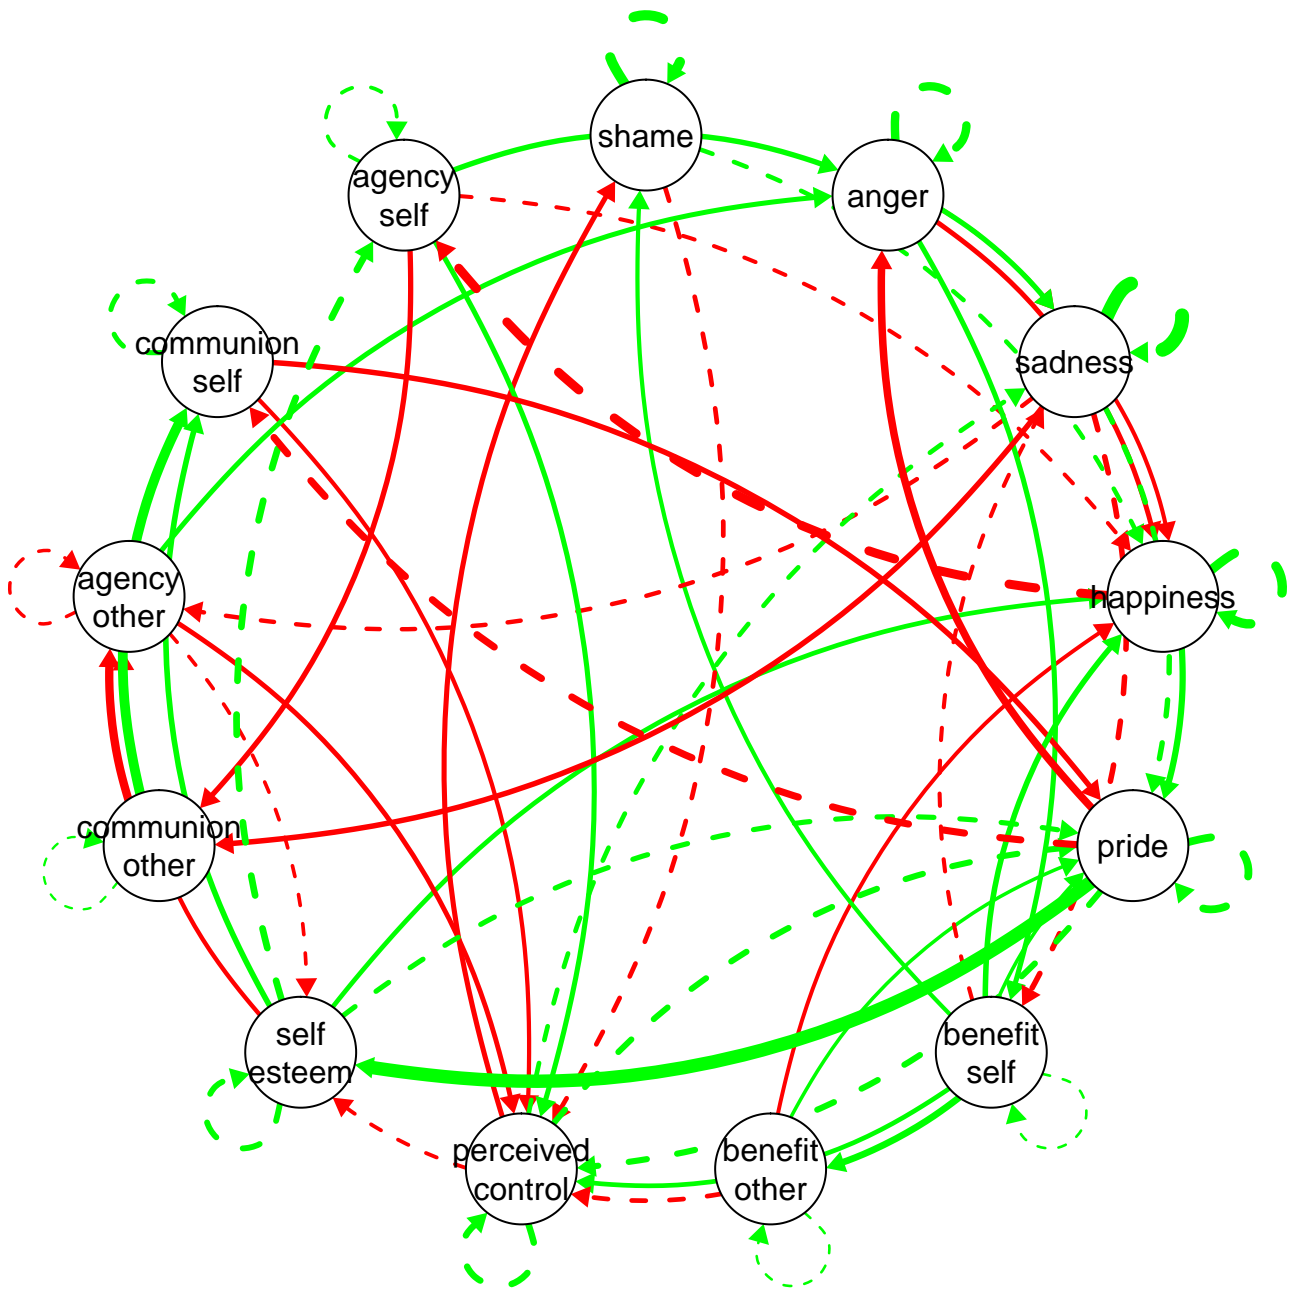

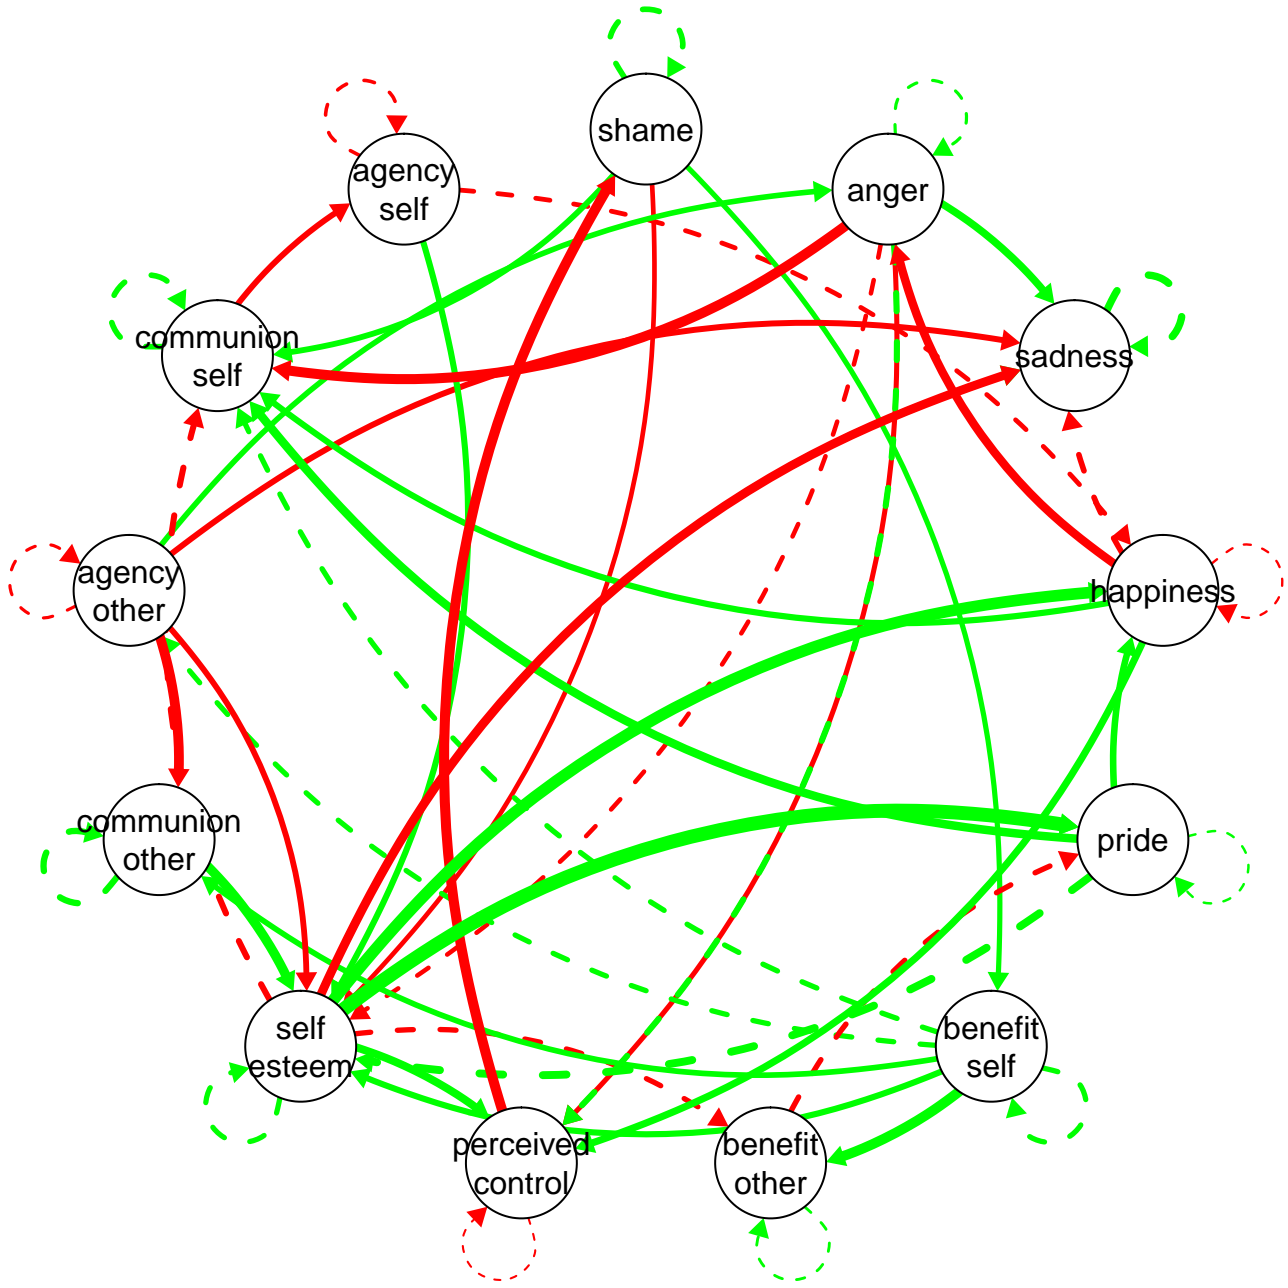

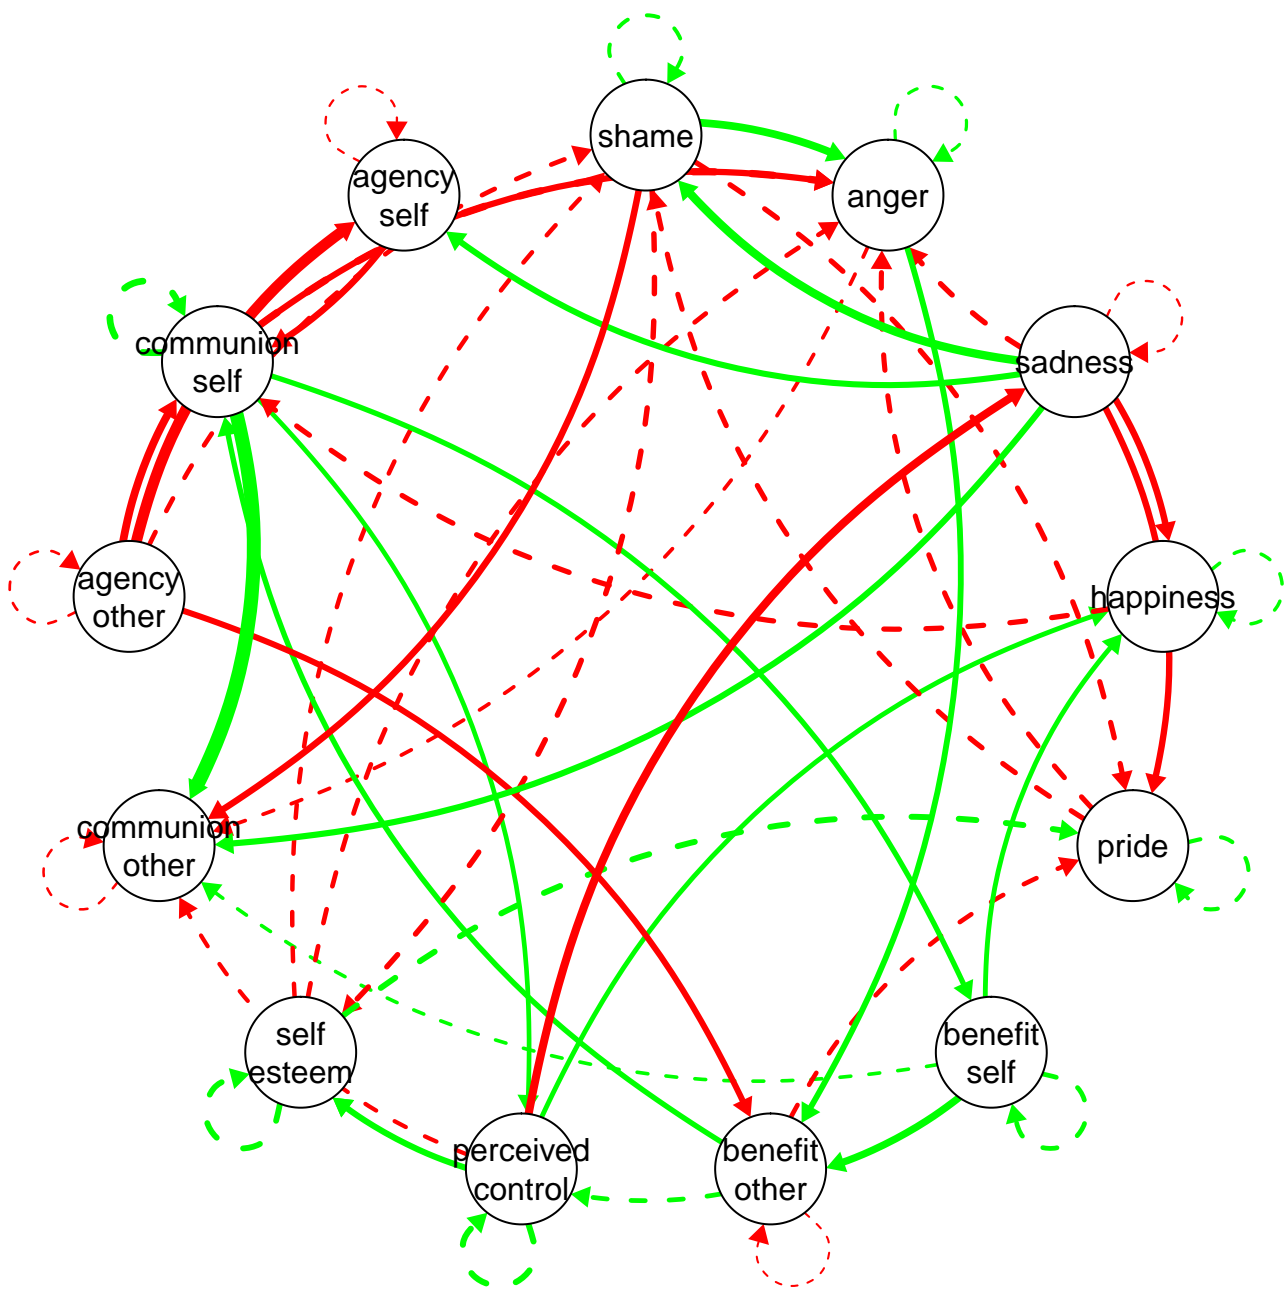

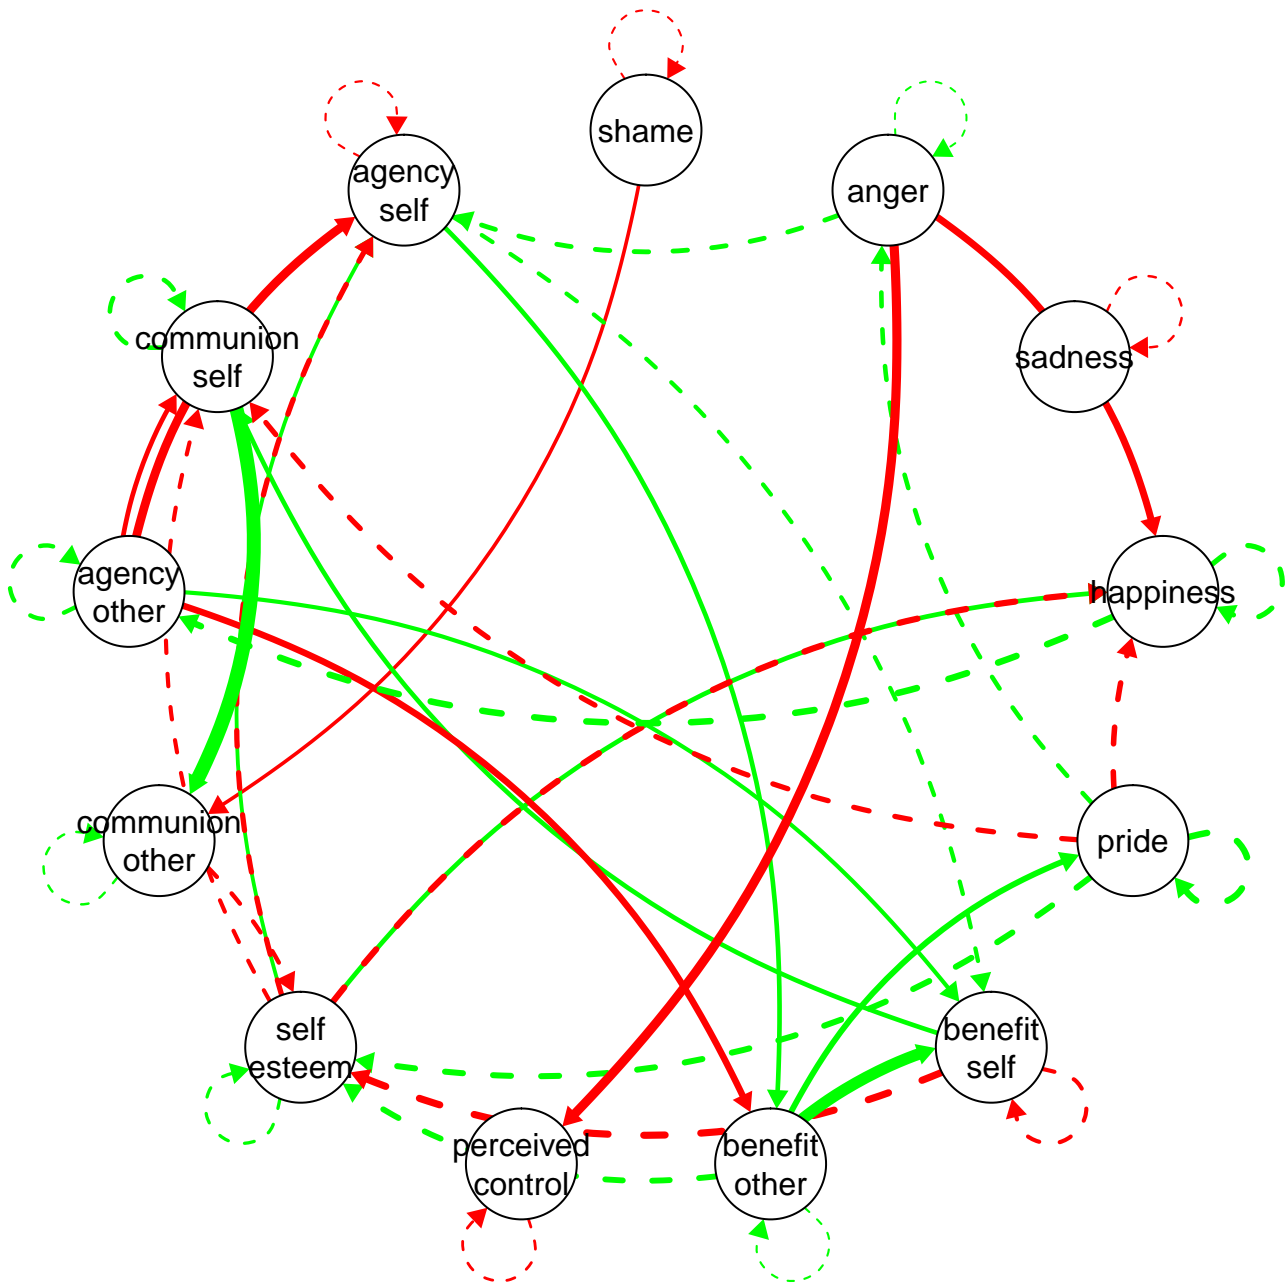

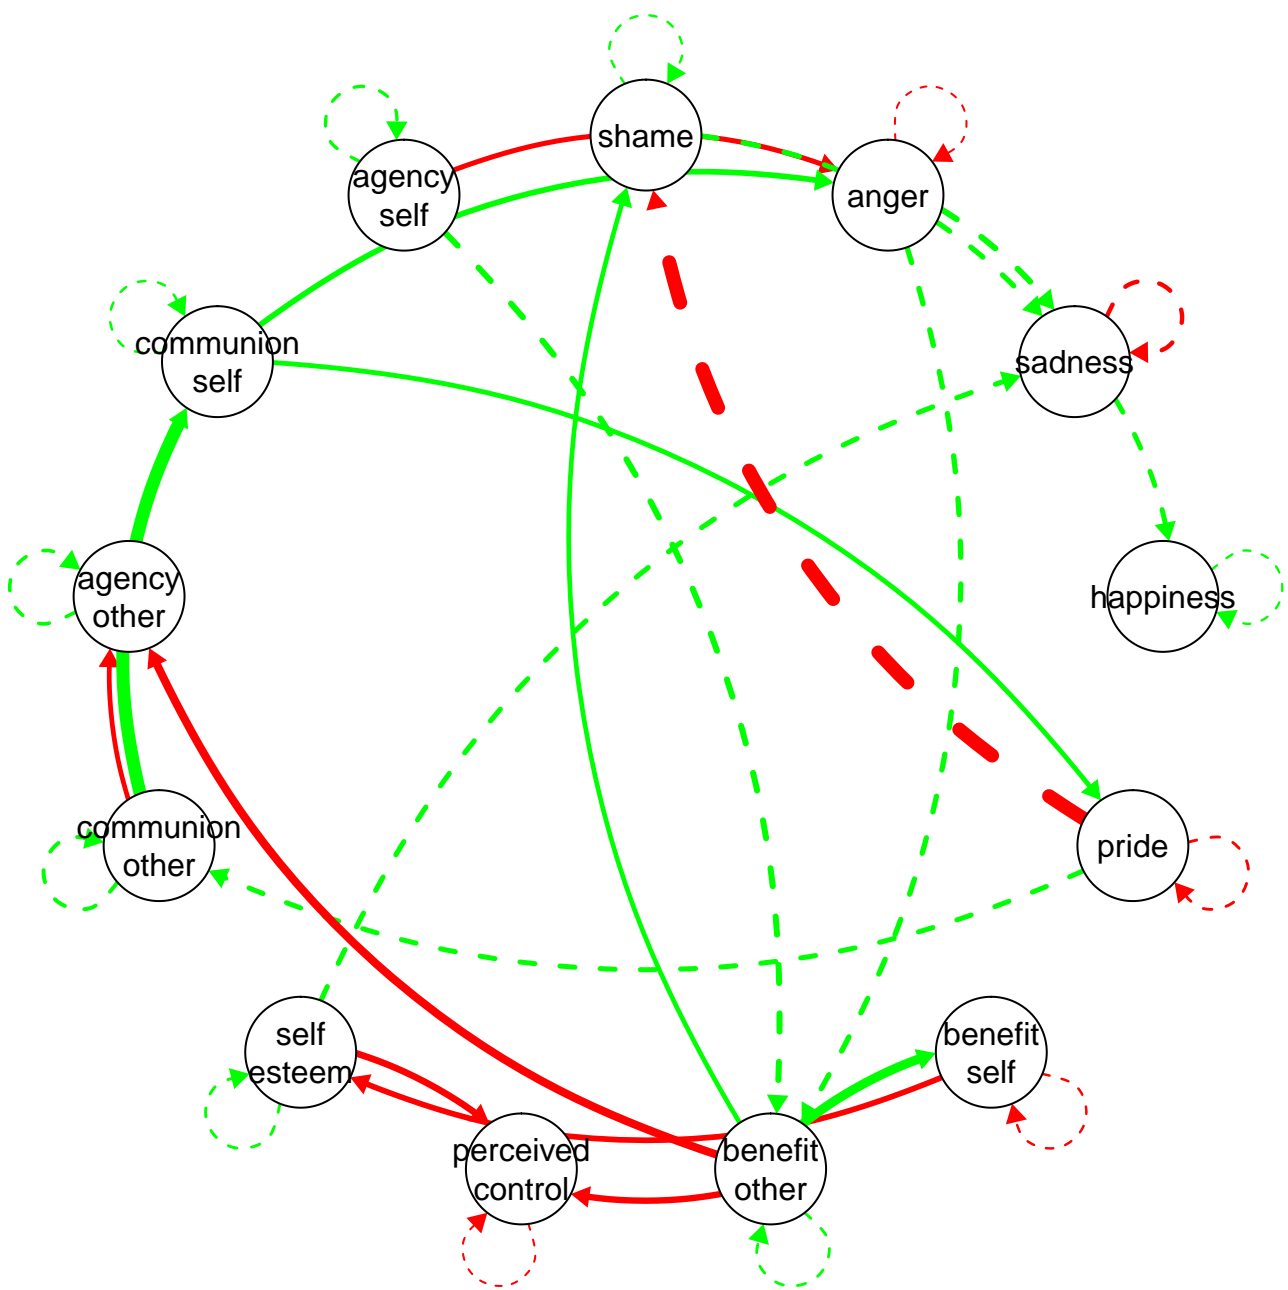

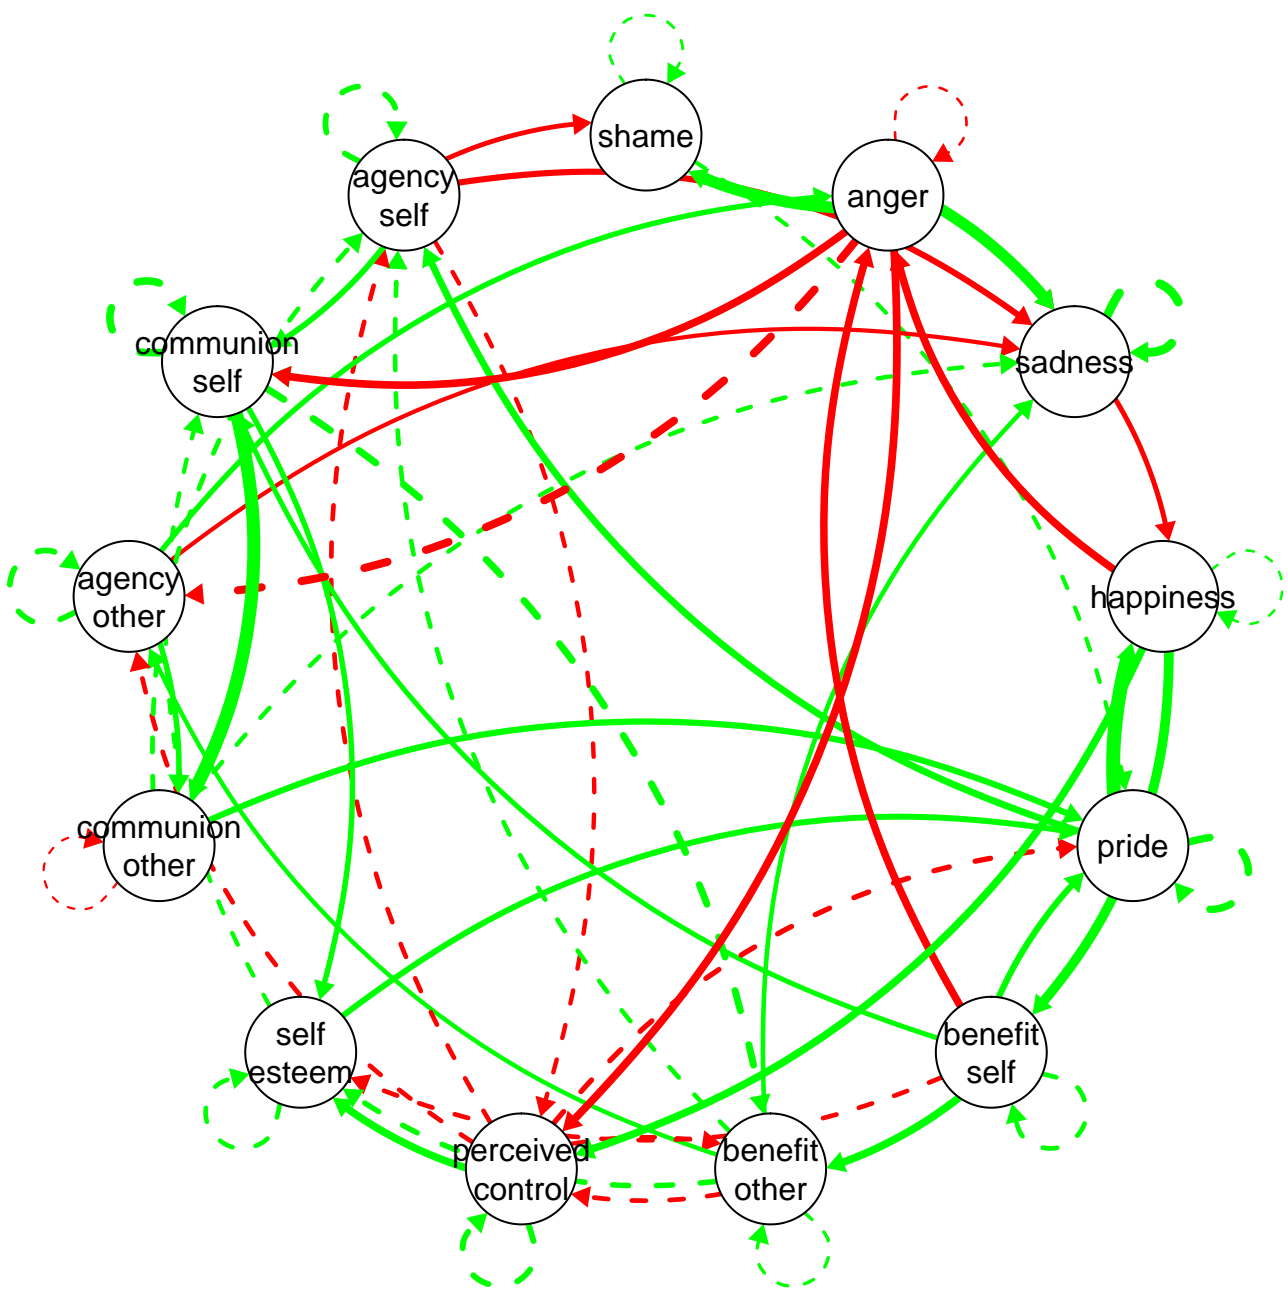



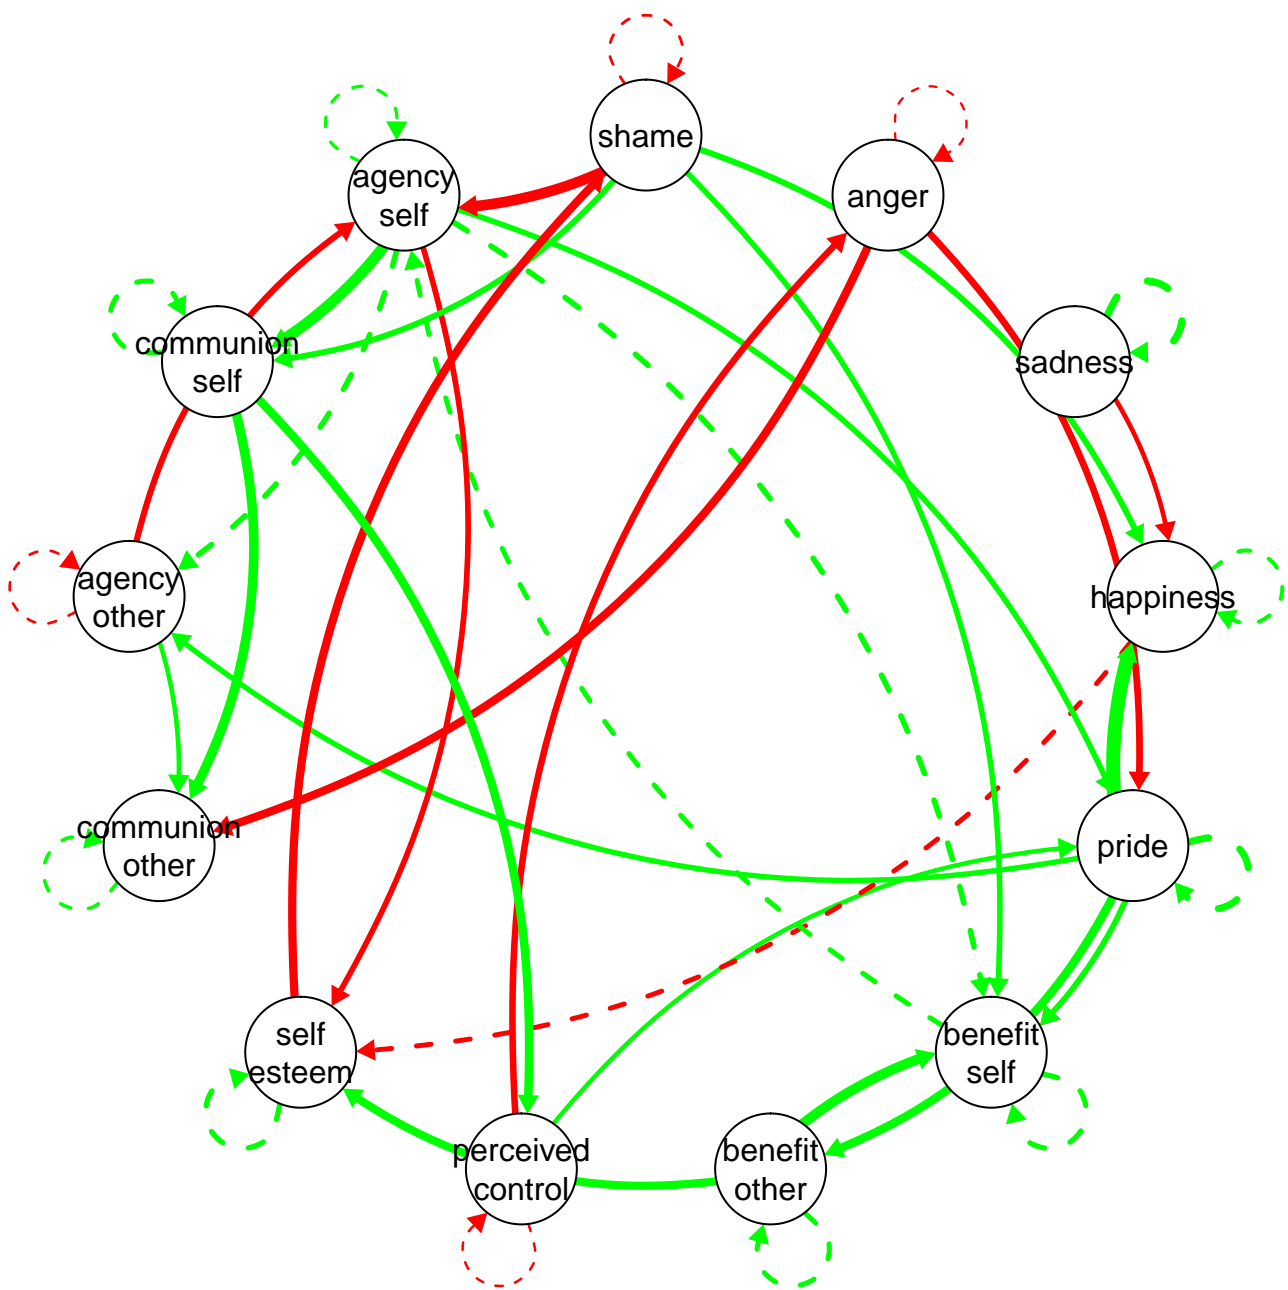

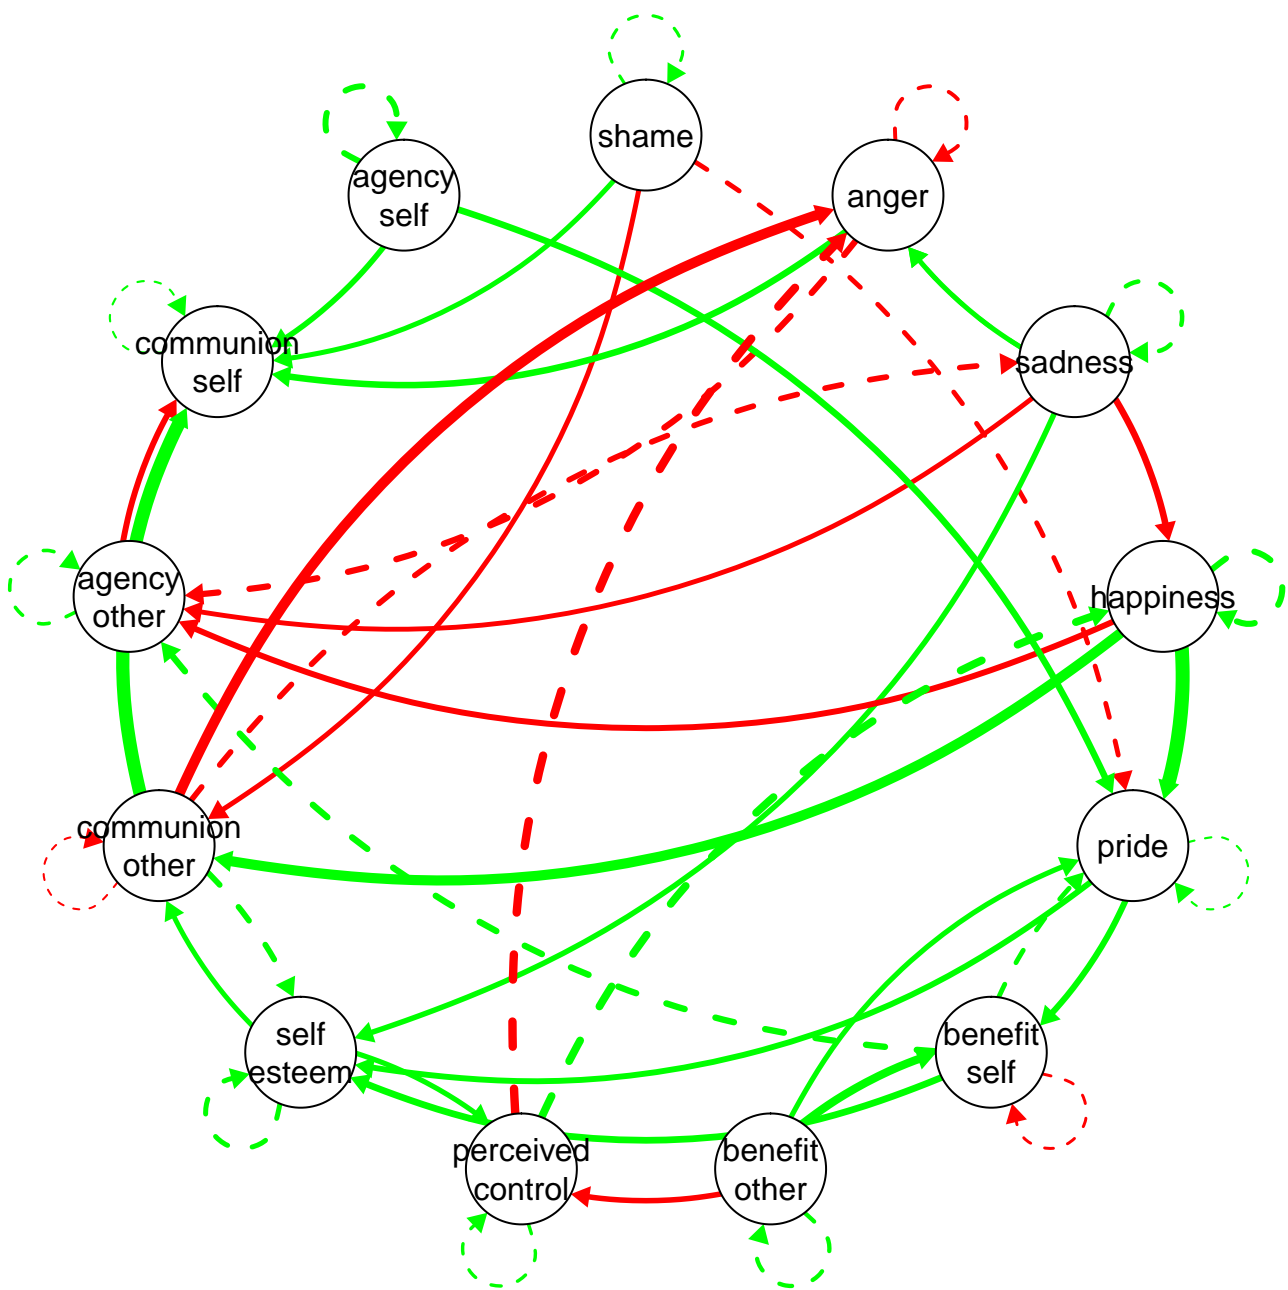

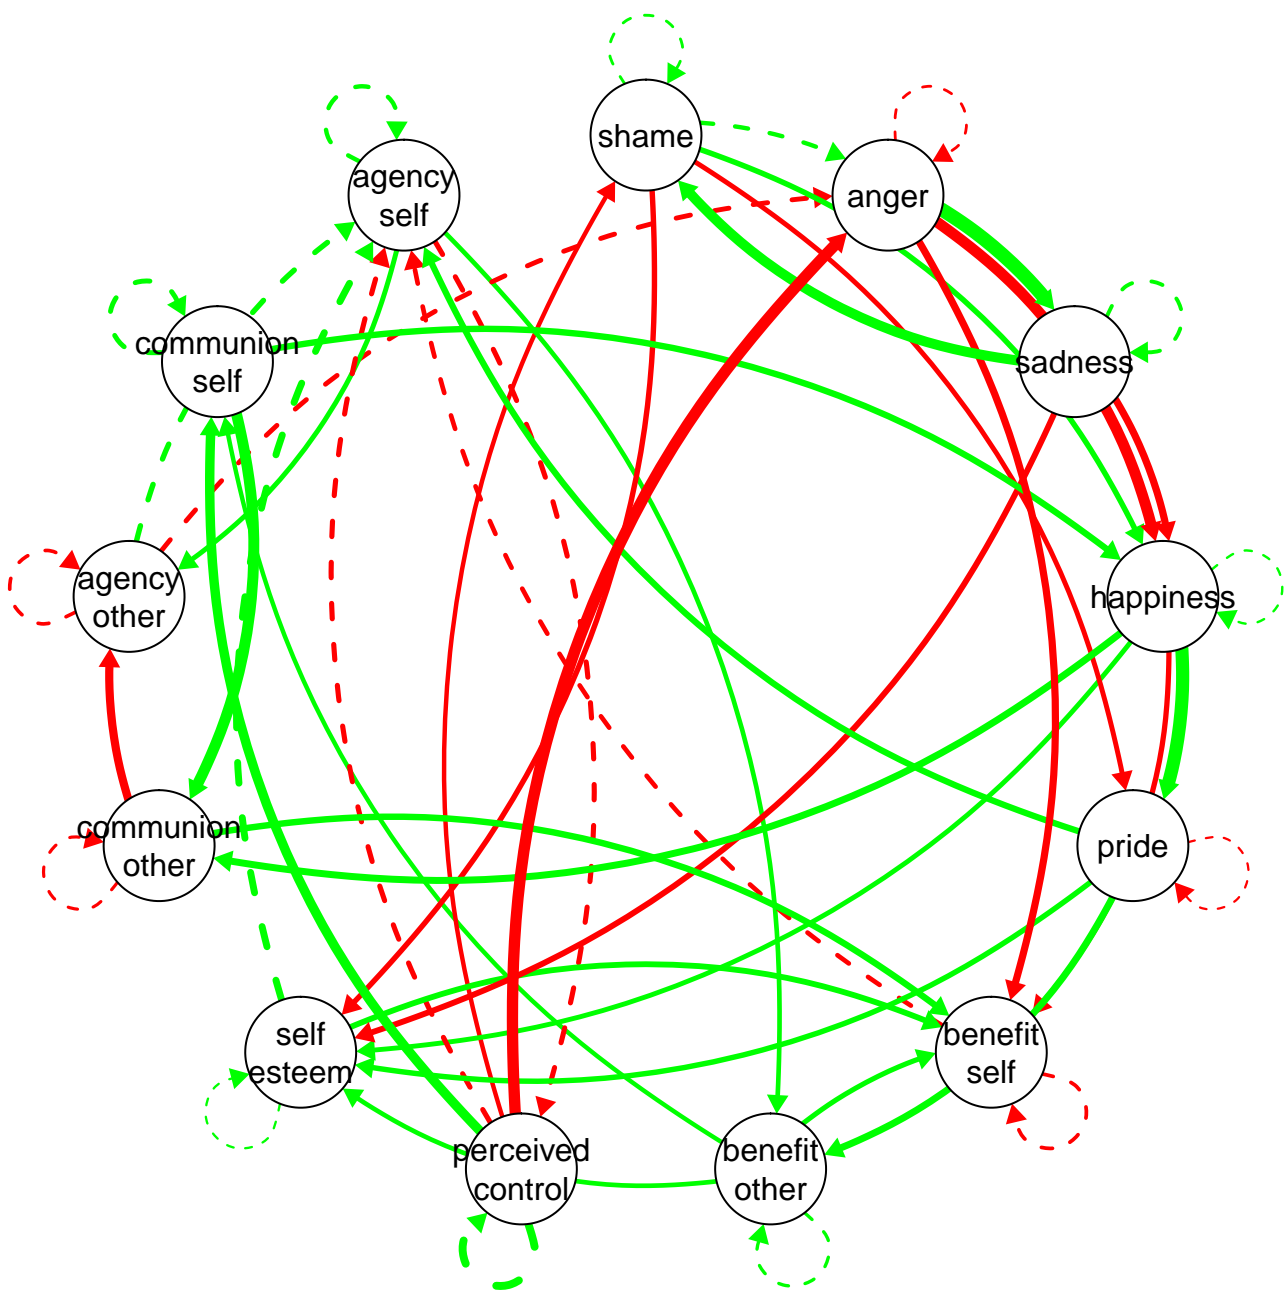

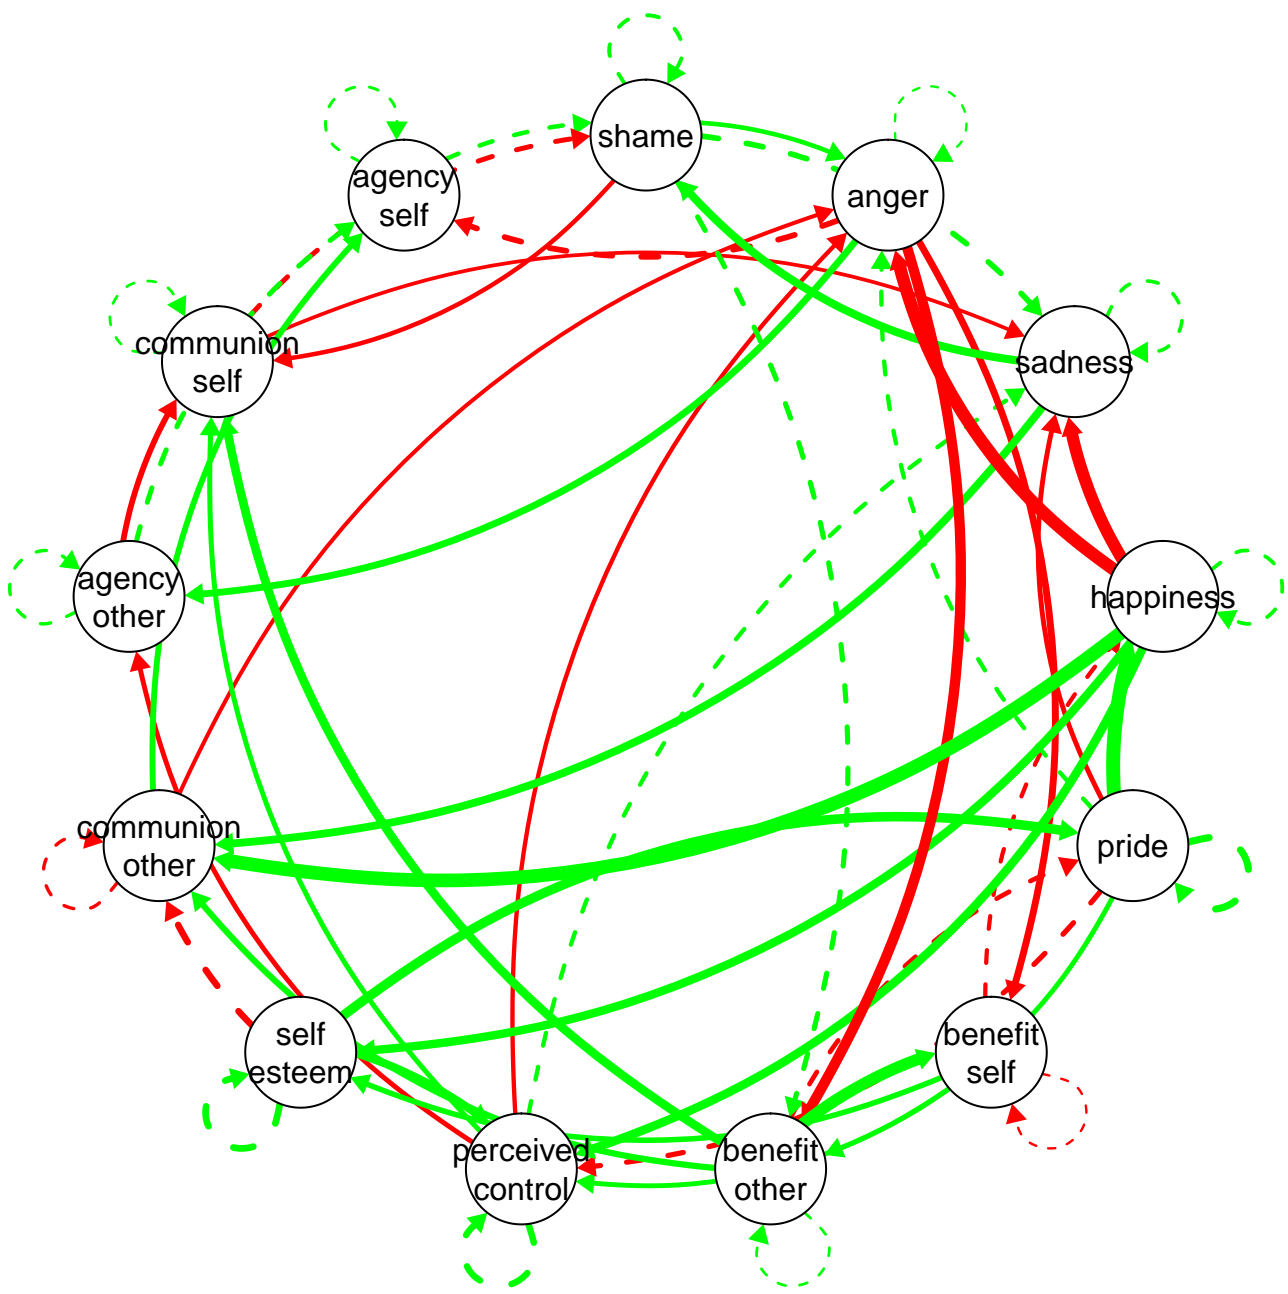

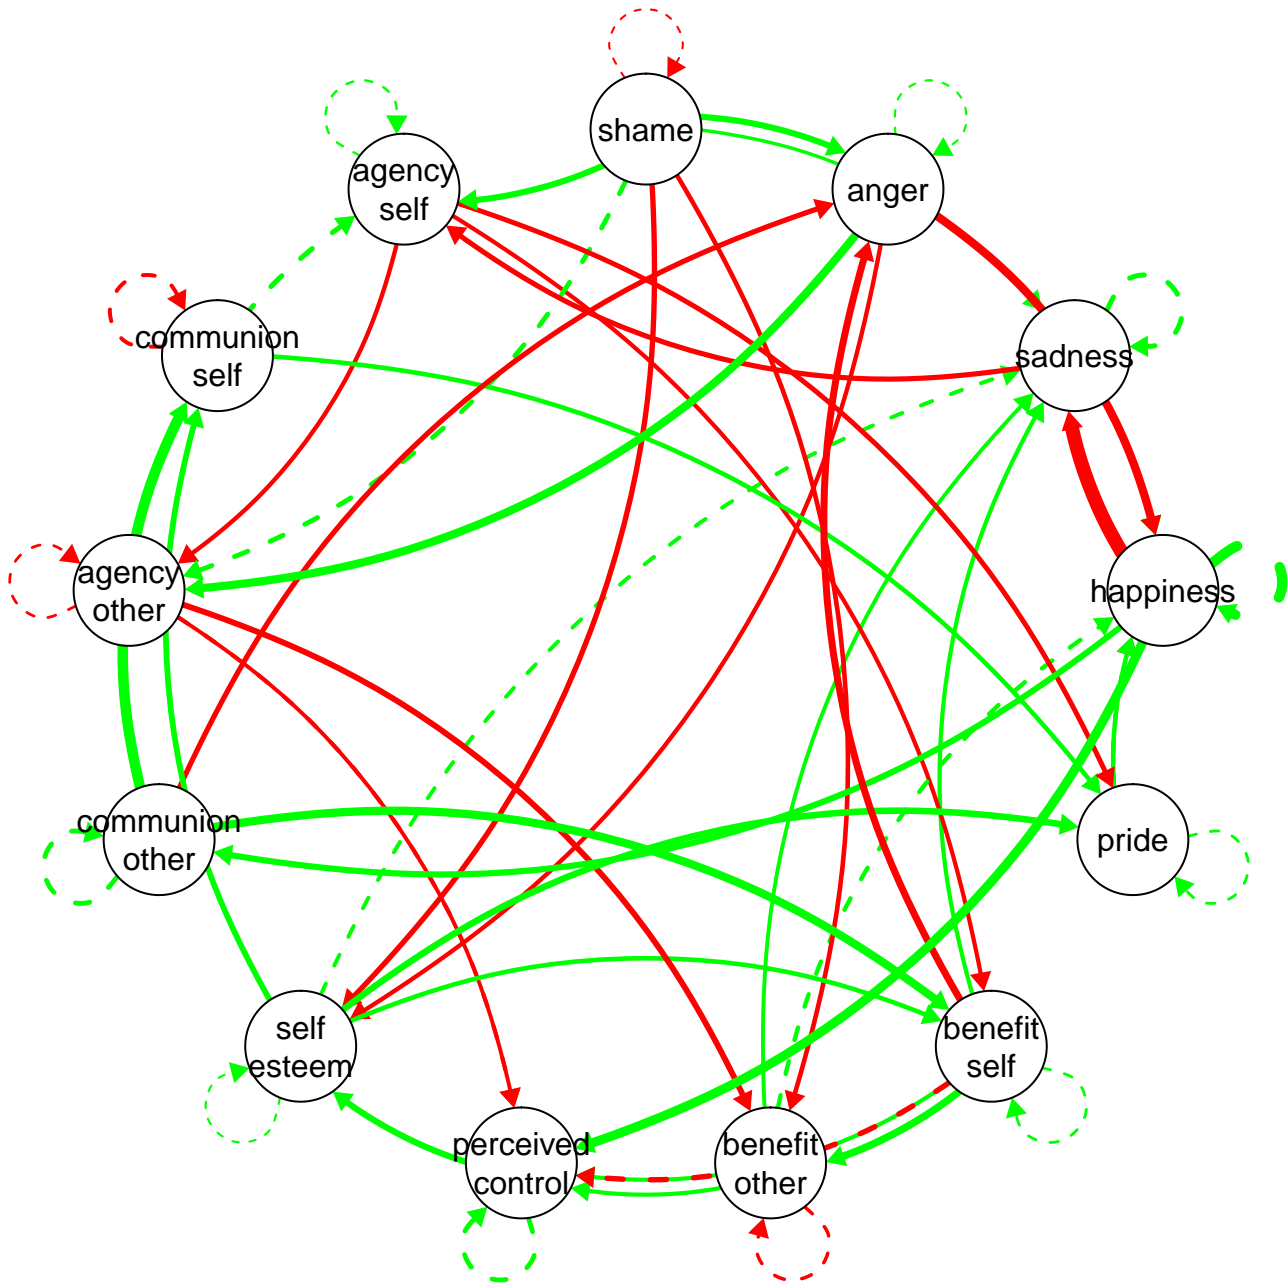

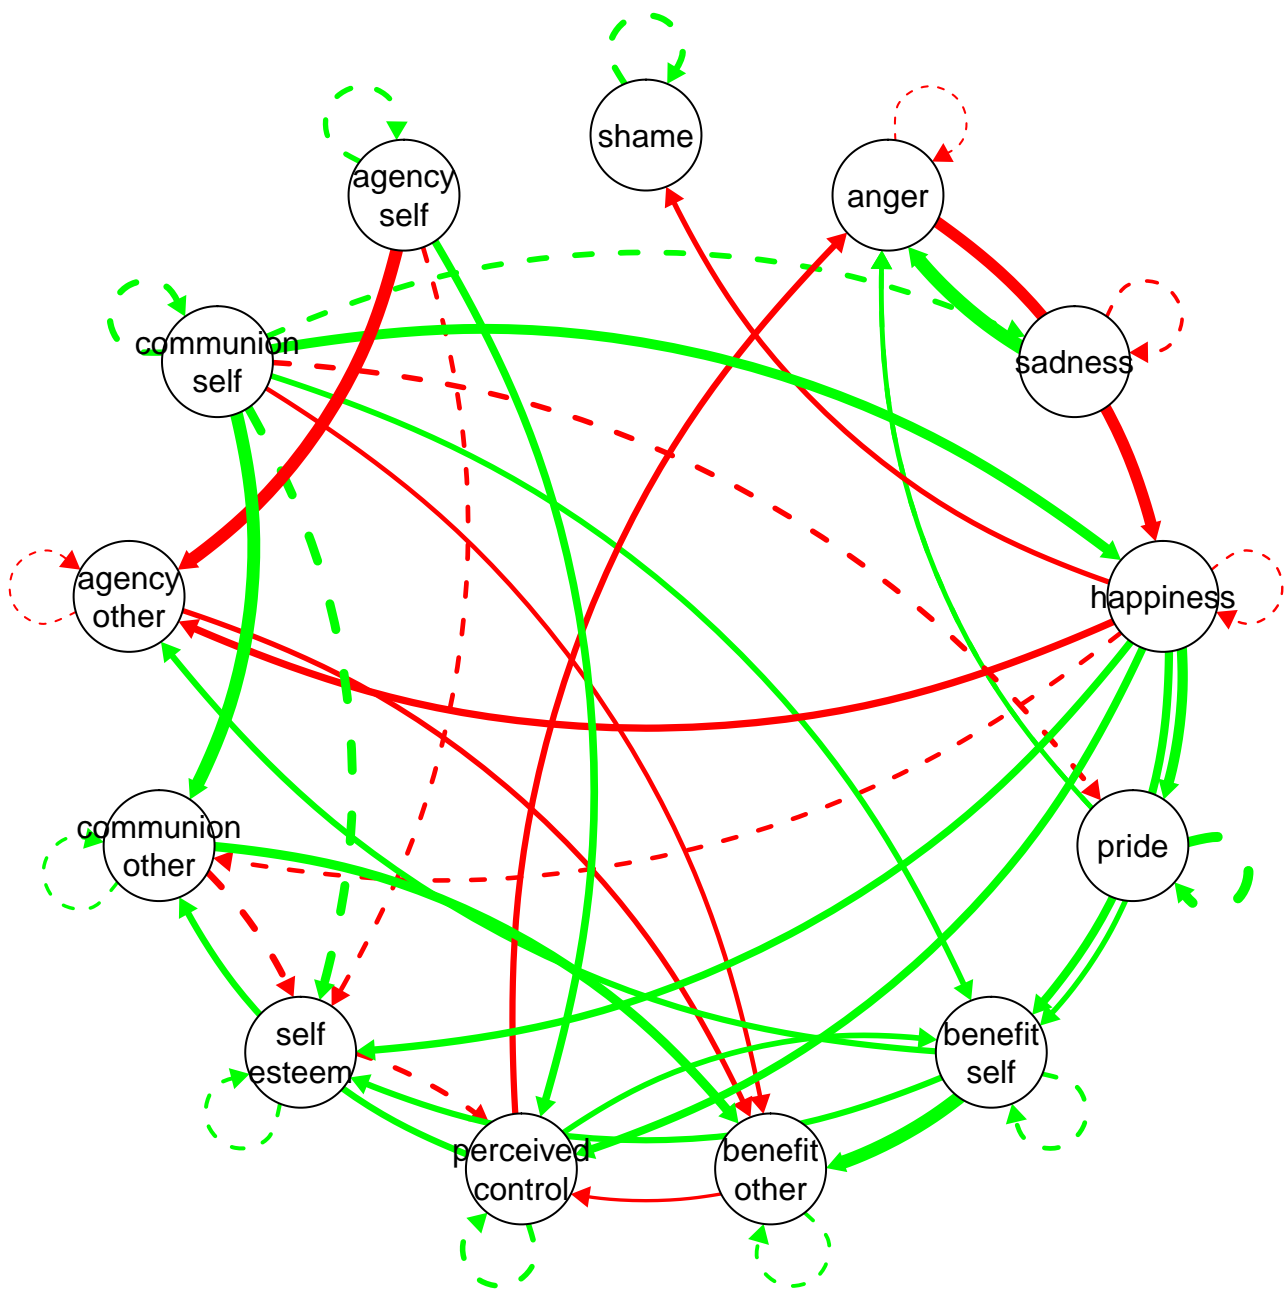



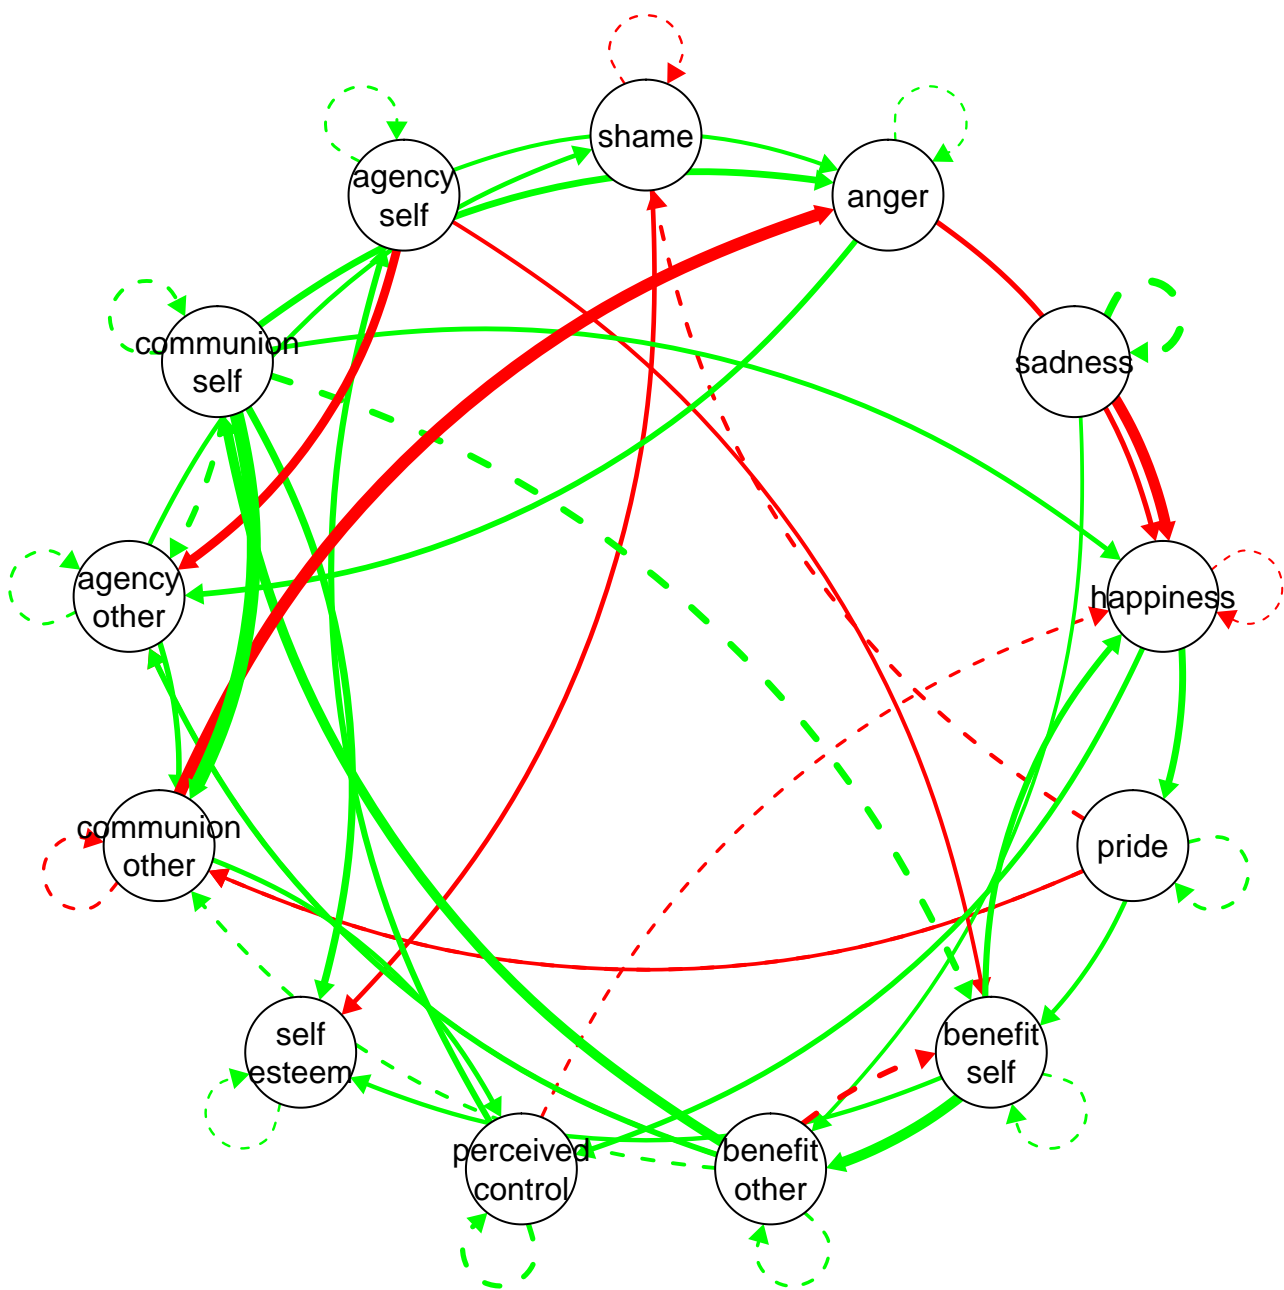

Supplement: NIHMS1001160-supplement-2.pdf [file NIHMS1001160-supplement-2.pdf]
